# Supplementary material for: A novel RAB5 binding site in human VPS34-CII that is likely the primordial site in eukaryotic evolution
Source: eLife. 2026 May 28;15:RP110040. doi: 10.7554/eLife.110040 (PMC13218723; doi:10.7554/eLife.110040)
Supplement: Figure 1—figure supplement 1—source data 1. [file elife-110040-fig1-figsupp1-data1.xlsx]

## Sheet: Fig1-S1A 330 nm
	Fluorescence counts at 330 nm
Temperature, °C	VPS34-CII WT	mCherry-VPS34-CII WT
15	11017.6	5053.94
15.0326	10995.1	5057.51
15.0653	10968.9	5061.56
15.0979	10952.9	5058.73
15.1305	10944.5	5060.4
15.1632	10932.3	5063.26
15.1958	10916.7	5060.83
15.2285	10915	5062.42
15.2611	10890.4	5061.68
15.2937	10887.1	5058.3
15.3264	10876.9	5062.79
15.359	10862.1	5056.21
15.3916	10860.7	5055.93
15.4243	10852.1	5058.68
15.4569	10839.4	5057.48
15.4896	10836.3	5054.85
15.5222	10832.3	5043.71
15.5548	10808.7	5047.46
15.5875	10807.4	5046.14
15.6201	10798.4	5044.79
15.6527	10792.9	5036.34
15.6854	10781.8	5041.21
15.718	10770.5	5038.06
15.7507	10760.8	5038.66
15.7833	10757.3	5032.36
15.8159	10752	5029.86
15.8486	10747.3	5037.4
15.8812	10740	5032.13
15.9138	10721.1	5024.22
15.9465	10724.7	5023.32
15.9791	10716.9	5019.85
16.0117	10708.8	5019.48
16.0444	10701.1	5018.45
16.077	10703.4	5021.95
16.1097	10692.6	5021
16.1423	10691.9	5019.71
16.1749	10680	5007.22
16.2076	10669.8	5001.34
16.2402	10657.4	5009.51
16.2728	10659.5	5005.26
16.3055	10648.8	5001.32
16.3381	10642	5003.76
16.3708	10634.5	4998.06
16.4034	10633.7	5000.14
16.436	10624.1	5003.08
16.4687	10616.6	5000.14
16.5013	10599.1	4986.27
16.5339	10602.6	4992.1
16.5666	10589	4988.11
16.5992	10589	4987.63
16.6319	10588.3	4988.73
16.6645	10581.3	4988.2
16.6971	10573.5	4988.17
16.7298	10579.1	4980
16.7624	10564.2	4983.44
16.795	10558.3	4979.85
16.8277	10543.2	4981.18
16.8603	10547.7	4980.26
16.893	10535.1	4979
16.9256	10534.5	4978.02
16.9582	10523.6	4970.85
16.9909	10523.8	4970.87
17.0235	10523.1	4971.68
17.0561	10511.5	4969.19
17.0888	10502.1	4962.92
17.1214	10498.2	4960.18
17.154	10494.2	4960.48
17.1867	10489.6	4956.73
17.2193	10473.4	4954.58
17.252	10473	4952.1
17.2846	10462.9	4950.79
17.3172	10455.3	4948.94
17.3499	10445.5	4949.81
17.3825	10447.9	4949.66
17.4151	10437.5	4944
17.4478	10441.3	4943.17
17.4804	10421.9	4938.16
17.5131	10419.6	4937.98
17.5457	10410.8	4930.14
17.5783	10412.3	4931.03
17.611	10412.3	4935.07
17.6436	10403.5	4927.46
17.6762	10379.6	4921.74
17.7089	10383.5	4920.73
17.7415	10389.3	4922.88
17.7742	10380.6	4916.24
17.8068	10367.7	4914.46
17.8394	10373.5	4911.8
17.8721	10360	4913.08
17.9047	10354.7	4910.78
17.9373	10347.2	4906.38
17.97	10339.9	4899.25
18.0026	10337.7	4895.25
18.0352	10333	4895.77
18.0679	10325.6	4891.92
18.1005	10312.8	4891.38
18.1332	10304.4	4895.63
18.1658	10302.5	4895.21
18.1984	10292.2	4891.6
18.2311	10286.5	4890.59
18.2637	10280.3	4890.6
18.2963	10275.5	4890.16
18.329	10272.4	4897.62
18.3616	10269.9	4883.06
18.3943	10268.6	4878.05
18.4269	10261	4877.26
18.4595	10261.1	4877.71
18.4922	10240.4	4877.81
18.5248	10237.7	4870.07
18.5574	10228	4873.42
18.5901	10229.2	4875.46
18.6227	10217.9	4867.6
18.6554	10208	4870.82
18.688	10218.5	4861.27
18.7206	10223.6	4860.1
18.7533	10199.4	4859.36
18.7859	10204.2	4854.65
18.8185	10179.2	4847.77
18.8512	10167.7	4841.94
18.8838	10178.7	4837.62
18.9164	10183.8	4835.08
18.9491	10165.7	4841.99
18.9817	10167.2	4834.75
19.0144	10151.5	4835.13
19.047	10140	4833.56
19.0796	10132.1	4833.83
19.1123	10129.9	4826.6
19.1449	10128.6	4829.51
19.1775	10124.7	4828.29
19.2102	10118.8	4817.42
19.2428	10117.4	4813.67
19.2755	10106.6	4814.36
19.3081	10101.7	4810.62
19.3407	10086.6	4814.53
19.3734	10089.6	4812.07
19.406	10084.3	4804.18
19.4386	10074.2	4804.73
19.4713	10073.6	4795.3
19.5039	10070.3	4797.92
19.5366	10057.6	4797.94
19.5692	10060.3	4799.94
19.6018	10048.6	4789.87
19.6345	10054.1	4790.07
19.6671	10036.1	4781.05
19.6997	10034.2	4776.42
19.7324	10029.7	4780.38
19.765	10030.6	4781.55
19.7977	10022.2	4779.88
19.8303	10019	4775.13
19.8629	10001.4	4777.75
19.8956	9993.56	4774.73
19.9282	9991.07	4767.35
19.9608	9988.5	4765.19
19.9935	9975.87	4767.01
20.0261	9967.11	4761.02
20.0587	9966.73	4756.42
20.0914	9960.14	4758.5
20.124	9956.32	4758.97
20.1567	9952.02	4756.77
20.1893	9938.59	4752.11
20.2219	9936.28	4750.27
20.2546	9935.54	4754.89
20.2872	9926.53	4750.49
20.3198	9920.99	4746.34
20.3525	9921.65	4753.66
20.3851	9910.11	4750.48
20.4178	9909.09	4744.58
20.4504	9899.21	4739.86
20.483	9895.36	4735.85
20.5157	9888.16	4739.69
20.5483	9895.41	4738.17
20.5809	9888.2	4731.87
20.6136	9880.61	4732.04
20.6462	9873.14	4733.07
20.6789	9868.12	4730.09
20.7115	9861.75	4718.13
20.7441	9858.73	4715.24
20.7768	9843.99	4720.43
20.8094	9848.34	4722.09
20.842	9827.98	4716.9
20.8747	9828.89	4711.28
20.9073	9821.81	4712.8
20.9399	9813.87	4705.74
20.9726	9819.87	4711.26
21.0052	9816.28	4703.93
21.0379	9811.24	4700.49
21.0705	9810.28	4697.79
21.1031	9808.07	4702.64
21.1358	9796.99	4699.59
21.1684	9789.24	4695.81
21.201	9784.52	4697.06
21.2337	9775.97	4691.56
21.2663	9769.79	4687.82
21.299	9751.08	4688
21.3316	9748.29	4685.82
21.3642	9755.01	4677.97
21.3969	9747.88	4671.74
21.4295	9743	4667.28
21.4621	9742.13	4666.13
21.4948	9735.27	4666.92
21.5274	9730.49	4664.68
21.5601	9720.36	4665.59
21.5927	9717.08	4663.96
21.6253	9717.12	4660.42
21.658	9708.86	4656.31
21.6906	9706.55	4653.81
21.7232	9697.62	4648.65
21.7559	9694.46	4652.28
21.7885	9688.47	4642.38
21.8211	9679.7	4641.78
21.8538	9681.8	4644.43
21.8864	9679.91	4637.79
21.9191	9665.42	4639.48
21.9517	9661.3	4638.56
21.9843	9653.39	4636.13
22.017	9650.64	4636.12
22.0496	9649.8	4636.64
22.0822	9650.63	4630.63
22.1149	9639.48	4630.53
22.1475	9628.74	4630.72
22.1802	9622.62	4624.65
22.2128	9618.35	4619.2
22.2454	9619.73	4616.44
22.2781	9605.85	4619.83
22.3107	9600.49	4611.58
22.3433	9603.42	4608.05
22.376	9592.48	4609.07
22.4086	9590.81	4607.51
22.4413	9584.49	4605.52
22.4739	9578.22	4604.07
22.5065	9569.84	4611.07
22.5392	9566.62	4603.21
22.5718	9564.58	4596.98
22.6044	9555.37	4596.95
22.6371	9551.8	4597.72
22.6697	9540.77	4598.58
22.7023	9545.18	4593.19
22.735	9537.15	4593.46
22.7676	9528.16	4594.09
22.8003	9520.76	4590.29
22.8329	9524.1	4584.45
22.8655	9523.95	4580.76
22.8982	9505.7	4574.11
22.9308	9510.66	4574.07
22.9634	9495.33	4577.5
22.9961	9491.58	4579.76
23.0287	9486.67	4577.28
23.0614	9487.59	4570.85
23.094	9480.67	4567.53
23.1266	9474.32	4568.42
23.1593	9480.93	4573.08
23.1919	9472.13	4571.87
23.2245	9466.8	4556.85
23.2572	9460.5	4552.18
23.2898	9445.6	4551.66
23.3225	9443.45	4550.57
23.3551	9437.53	4543.45
23.3877	9430.47	4544.68
23.4204	9431.43	4542.4
23.453	9428.45	4543.33
23.4856	9419.34	4546.42
23.5183	9414.58	4547.34
23.5509	9408.27	4542.22
23.5836	9402.95	4530.77
23.6162	9394.22	4529.8
23.6488	9390.45	4529.78
23.6815	9393.83	4524.89
23.7141	9389.52	4522.39
23.7467	9381.01	4521.77
23.7794	9368.04	4521.03
23.812	9367.53	4518.98
23.8446	9371.44	4513.95
23.8773	9364.9	4509.2
23.9099	9356.07	4509.25
23.9426	9359.51	4507.29
23.9752	9348.54	4509.12
24.0078	9345.12	4506.89
24.0405	9334.87	4505.52
24.0731	9336.73	4504.19
24.1057	9329.05	4499.24
24.1384	9324.08	4499.31
24.171	9315.02	4491.32
24.2037	9316.9	4493.23
24.2363	9314.32	4488.21
24.2689	9301.19	4485.01
24.3016	9300.43	4483.68
24.3342	9294.1	4485.88
24.3668	9291.04	4486.19
24.3995	9287.82	4481.29
24.4321	9280.54	4476.78
24.4648	9276.16	4479.44
24.4974	9272.21	4472.37
24.53	9266.8	4471.14
24.5627	9259.77	4469.75
24.5953	9255.95	4469.05
24.6279	9252.95	4466.97
24.6606	9248.93	4464.3
24.6932	9235.86	4461.8
24.7258	9234.44	4462.88
24.7585	9226.57	4453.82
24.7911	9229.4	4452.72
24.8238	9230.04	4454.43
24.8564	9217.26	4451.05
24.889	9217.56	4451.33
24.9217	9204.88	4449.43
24.9543	9201.14	4447.26
24.9869	9200.11	4443.02
25.0196	9194.4	4447.04
25.0522	9191.57	4443.74
25.0849	9180.62	4433.37
25.1175	9177.2	4433.17
25.1501	9178.45	4431.17
25.1828	9173.41	4426.86
25.2154	9163.92	4424.71
25.248	9166.67	4421.22
25.2807	9161.22	4422.9
25.3133	9156.78	4427.7
25.346	9146.01	4417.37
25.3786	9143.29	4420.88
25.4112	9140.16	4420.68
25.4439	9142.89	4414.97
25.4765	9131.1	4412.62
25.5091	9126.32	4408.5
25.5418	9116.09	4410.11
25.5744	9120.54	4406.05
25.607	9105.47	4406.38
25.6397	9108.4	4406
25.6723	9104.31	4400.22
25.705	9100.25	4395.94
25.7376	9092.25	4393.5
25.7702	9089.95	4392.38
25.8029	9077.21	4390.49
25.8355	9077.09	4391.5
25.8681	9065.54	4388.32
25.9008	9068.87	4385.77
25.9334	9063.09	4376.03
25.9661	9061.56	4376.23
25.9987	9055.1	4377.93
26.0313	9046.88	4377.6
26.064	9046.44	4376.65
26.0966	9047.31	4374.2
26.1292	9044.52	4371.6
26.1619	9032.44	4372.86
26.1945	9030.58	4372.23
26.2272	9022.63	4367.43
26.2598	9015.34	4367.36
26.2924	9012.28	4363.92
26.3251	9009.66	4362.47
26.3577	9002.19	4359.37
26.3903	9009.13	4353.18
26.423	8991.47	4355.03
26.4556	8996.3	4351.09
26.4883	8981.71	4352.81
26.5209	8973.87	4352.36
26.5535	8977.81	4347.92
26.5862	8971.74	4343.64
26.6188	8973.26	4340.75
26.6514	8975.32	4338.72
26.6841	8966.56	4330.01
26.7167	8967.73	4327.1
26.7493	8944.84	4333.03
26.782	8943.07	4327.4
26.8146	8936.28	4326.04
26.8473	8935.21	4318.13
26.8799	8920.01	4322.08
26.9125	8924.13	4320.08
26.9452	8920.76	4316.02
26.9778	8917.72	4314.91
27.0104	8914.14	4311.66
27.0431	8918.81	4312.38
27.0757	8900.15	4322.08
27.1084	8895.86	4314.18
27.141	8891.35	4311.02
27.1736	8886.56	4310.61
27.2063	8868.28	4311.01
27.2389	8874.48	4303.83
27.2715	8874.76	4301.08
27.3042	8869.79	4304.61
27.3368	8867.57	4298.31
27.3695	8863.35	4295.3
27.4021	8850.33	4294.61
27.4347	8846.13	4291.91
27.4674	8846.13	4289.82
27.5	8846.03	4289.71
27.5326	8830.28	4286.65
27.5653	8824.62	4287.53
27.5979	8828.37	4285.01
27.6305	8820.67	4284.35
27.6632	8821.52	4281.03
27.6958	8815.68	4272.4
27.7285	8810.61	4266.08
27.7611	8809.05	4265.83
27.7937	8808.15	4264.28
27.8264	8803.85	4264.51
27.859	8792.62	4258.28
27.8916	8797.68	4263.46
27.9243	8781.93	4264.03
27.9569	8776.49	4263.99
27.9896	8775.26	4262.56
28.0222	8770.65	4264.06
28.0548	8766.06	4263.87
28.0875	8763.78	4257.51
28.1201	8757.24	4258.18
28.1527	8751.96	4250.67
28.1854	8758.21	4253.97
28.218	8748	4251.16
28.2507	8740.81	4245.77
28.2833	8736.33	4244.53
28.3159	8727.72	4241.57
28.3486	8731.16	4243.25
28.3812	8720.07	4234.73
28.4138	8715.89	4237.64
28.4465	8717.85	4239.54
28.4791	8712.61	4233.61
28.5117	8705.42	4229.33
28.5444	8704.85	4225.64
28.577	8693.28	4221.11
28.6097	8692.41	4223.31
28.6423	8684.76	4222.39
28.6749	8681.49	4219.64
28.7076	8677.02	4214.31
28.7402	8673.52	4211.94
28.7728	8671.63	4212.98
28.8055	8664.4	4211.92
28.8381	8658.64	4204.4
28.8708	8656.46	4211.14
28.9034	8644.31	4211.82
28.936	8646.9	4208.34
28.9687	8646.63	4206.07
29.0013	8644.71	4203.67
29.0339	8641.9	4202.17
29.0666	8627.33	4200.82
29.0992	8627.8	4198.61
29.1319	8617.72	4196.31
29.1645	8624.47	4194.54
29.1971	8621.16	4189.22
29.2298	8618.88	4181.19
29.2624	8622.8	4178.39
29.295	8616.51	4178.48
29.3277	8605	4179.2
29.3603	8603.63	4180.16
29.393	8593.04	4171.72
29.4256	8590.84	4169.31
29.4582	8582.09	4168.98
29.4909	8588.91	4167.96
29.5235	8579.22	4163.2
29.5561	8579.71	4161.67
29.5888	8572.87	4161.25
29.6214	8571.3	4155.71
29.654	8556.62	4153.62
29.6867	8559.81	4155.66
29.7193	8553.3	4150.92
29.752	8556.82	4150.5
29.7846	8549.12	4148.4
29.8172	8548.58	4148.46
29.8499	8534.86	4147.41
29.8825	8534.27	4144.16
29.9151	8534.45	4143.7
29.9478	8523.23	4142.28
29.9804	8514.83	4138.08
30.0131	8509.91	4138.06
30.0457	8506.34	4135.37
30.0783	8510.55	4134.22
30.111	8511.88	4134.23
30.1436	8498.76	4133.57
30.1762	8499.46	4131.91
30.2089	8488.16	4135.84
30.2415	8483.56	4139.55
30.2742	8486.73	4132.87
30.3068	8484.4	4131.75
30.3394	8472.94	4130.69
30.3721	8471.33	4129.21
30.4047	8456.7	4123.76
30.4373	8457.11	4120.69
30.47	8454.83	4118.61
30.5026	8457.18	4114.83
30.5352	8446.97	4113.61
30.5679	8444.63	4116.61
30.6005	8435.5	4112.52
30.6332	8435.59	4114.12
30.6658	8430.33	4105.56
30.6984	8426.59	4105.91
30.7311	8424.93	4110.22
30.7637	8421.84	4108.22
30.7963	8412.21	4104.61
30.829	8414.04	4097.25
30.8616	8411.17	4097.8
30.8943	8406.65	4092.08
30.9269	8398.26	4099.25
30.9595	8396.14	4096.41
30.9922	8395.42	4091.63
31.0248	8388.71	4092.33
31.0574	8379.65	4095.03
31.0901	8376.32	4088.48
31.1227	8366.52	4091.03
31.1554	8362.39	4089.44
31.188	8354.35	4087.94
31.2206	8343.71	4084.55
31.2533	8348.84	4082.18
31.2859	8345.23	4073.92
31.3185	8339.52	4070.19
31.3512	8338.24	4065.45
31.3838	8329.73	4062.32
31.4164	8332.71	4065.61
31.4491	8328.56	4065.68
31.4817	8330	4060.73
31.5144	8315.69	4061.34
31.547	8307.95	4059.26
31.5796	8303.46	4052.39
31.6123	8307.6	4054.79
31.6449	8288.44	4048.24
31.6775	8283.05	4049.03
31.7102	8292.63	4043.34
31.7428	8284.59	4043.46
31.7755	8279.23	4043.73
31.8081	8276.47	4041.69
31.8407	8268.1	4040.91
31.8734	8269.42	4036.15
31.906	8264.33	4039.48
31.9386	8257.87	4040.16
31.9713	8253.41	4035
32.0039	8248.25	4025.94
32.0366	8247.97	4034.52
32.0692	8241.61	4033.36
32.1018	8231.34	4033.62
32.1345	8230.27	4026.55
32.1671	8218.81	4020.76
32.1997	8221.27	4020.76
32.2324	8215.79	4018.94
32.265	8214.75	4017.59
32.2977	8205.73	4011.49
32.3303	8203.57	4009.9
32.3629	8212.76	4011.29
32.3956	8197.71	4008.15
32.4282	8196.28	4002.58
32.4608	8190.44	3998.85
32.4935	8186.72	4008.03
32.5261	8182.25	4003.34
32.5587	8173.86	3995.85
32.5914	8175.09	3992.34
32.624	8165.64	3991.52
32.6567	8160.9	3989.53
32.6893	8157.32	3986.18
32.7219	8149.83	3988.05
32.7546	8142.84	3984.32
32.7872	8147.07	3979.64
32.8198	8151.28	3978.58
32.8525	8137.89	3982.71
32.8851	8131.25	3979.48
32.9178	8128.44	3972.62
32.9504	8131.22	3972.04
32.983	8129	3967.06
33.0157	8125.03	3966.91
33.0483	8115.22	3969.89
33.0809	8111.09	3963.81
33.1136	8107.66	3966.26
33.1462	8102.98	3960.63
33.1789	8100.82	3963.2
33.2115	8097.53	3957.8
33.2441	8095	3949.32
33.2768	8090.06	3945.63
33.3094	8078.22	3945.72
33.342	8078.29	3942.86
33.3747	8075.97	3942.31
33.4073	8078.14	3939.13
33.4399	8062.92	3945.79
33.4726	8055.5	3945.94
33.5052	8066.76	3938.73
33.5379	8066.47	3936.81
33.5705	8059.97	3940.67
33.6031	8052.49	3936.18
33.6358	8046.02	3926.77
33.6684	8040.1	3925.99
33.701	8033.68	3928.25
33.7337	8039.96	3932.98
33.7663	8023.78	3924.25
33.799	8025.84	3922.67
33.8316	8019.24	3919.15
33.8642	8020.69	3917.28
33.8969	8008.45	3916.57
33.9295	8006.96	3916.02
33.9621	7999.87	3914.01
33.9948	7995.52	3910.13
34.0274	7989.08	3911.77
34.0601	7993.39	3904.81
34.0927	7988.81	3908.86
34.1253	7986.71	3909.38
34.158	7979.9	3902.76
34.1906	7978.3	3903.14
34.2232	7979.59	3896.95
34.2559	7981.14	3887.54
34.2885	7973.16	3886.87
34.3211	7969.77	3886.53
34.3538	7955.22	3883.52
34.3864	7961.84	3885.9
34.4191	7957.83	3876.96
34.4517	7943.97	3880.61
34.4843	7951.6	3875.81
34.517	7954.16	3877.91
34.5496	7949.12	3879.25
34.5822	7943.54	3873.24
34.6149	7930.46	3871.74
34.6475	7921.85	3872.92
34.6802	7908.64	3872.45
34.7128	7900	3871.77
34.7454	7895.9	3866.46
34.7781	7893.25	3864.31
34.8107	7895.24	3866.43
34.8433	7884.57	3865.67
34.876	7888.03	3855.35
34.9086	7879.73	3854.3
34.9413	7874.96	3853.76
34.9739	7868.25	3854.16
35.0065	7863.25	3853.01
35.0392	7865.16	3848.43
35.0718	7866.22	3844.76
35.1044	7860.57	3847.76
35.1371	7853.26	3847.07
35.1697	7839.51	3844.79
35.2023	7840.41	3842.92
35.235	7837.74	3841.47
35.2676	7837.22	3838.19
35.3003	7828.79	3839.05
35.3329	7822	3835.86
35.3655	7818.66	3832.66
35.3982	7807.34	3830.54
35.4308	7822.91	3829.24
35.4634	7818.18	3827.54
35.4961	7808.86	3825.46
35.5287	7804.39	3821.42
35.5614	7793.91	3823.3
35.594	7800.6	3819.16
35.6266	7788.75	3827.23
35.6593	7792.96	3826.93
35.6919	7782.06	3816.18
35.7245	7782.46	3816.54
35.7572	7773.67	3814.96
35.7898	7774.87	3810.45
35.8225	7769.16	3809.92
35.8551	7766.75	3806.7
35.8877	7759.5	3807.9
35.9204	7757.03	3802.05
35.953	7750.57	3806.28
35.9856	7743.04	3802.54
36.0183	7739.04	3791.91
36.0509	7733.58	3792.24
36.0836	7726.56	3793.11
36.1162	7727.9	3787.13
36.1488	7711.73	3787.63
36.1815	7708.41	3788.04
36.2141	7705.62	3780.51
36.2467	7710.32	3782.74
36.2794	7722.88	3778.15
36.312	7721.07	3778.28
36.3446	7710.85	3782.19
36.3773	7706	3779.59
36.4099	7701.48	3778.33
36.4426	7704.7	3772.87
36.4752	7704.88	3773.55
36.5078	7701.76	3770.29
36.5405	7689.7	3768.63
36.5731	7687.34	3769.87
36.6057	7667.7	3764.45
36.6384	7675.29	3765.05
36.671	7676.91	3766.06
36.7037	7669.71	3762.23
36.7363	7666.78	3760.48
36.7689	7662.99	3754.51
36.8016	7655.41	3750.98
36.8342	7653.72	3751.74
36.8668	7659.78	3747.28
36.8995	7649.09	3748.38
36.9321	7637.99	3747.93
36.9648	7632.21	3741.86
36.9974	7619.26	3736.95
37.03	7615.07	3734.84
37.0627	7605.33	3735.03
37.0953	7603.92	3734.4
37.1279	7610.69	3732.42
37.1606	7610.79	3731.3
37.1932	7609.87	3730.28
37.2258	7606.57	3728.91
37.2585	7601.3	3727.58
37.2911	7597.46	3722.43
37.3238	7591.71	3721.31
37.3564	7590.64	3718.85
37.389	7585.88	3718.24
37.4217	7581.99	3721.46
37.4543	7576.86	3724.99
37.4869	7573.79	3716.88
37.5196	7571.39	3711.93
37.5522	7566.07	3709.85
37.5849	7566.77	3711.01
37.6175	7563.88	3712.25
37.6501	7562.2	3711.31
37.6828	7534.54	3706.11
37.7154	7527.58	3703.91
37.748	7526.08	3699.32
37.7807	7522.14	3690.18
37.8133	7519.37	3696.34
37.846	7517.57	3693.37
37.8786	7513.31	3693.01
37.9112	7514.95	3692.54
37.9439	7502.8	3688.16
37.9765	7500.76	3683.63
38.0091	7491.74	3688.39
38.0418	7496.3	3685.88
38.0744	7484.14	3681.41
38.107	7484.84	3682.33
38.1397	7470.9	3674.85
38.1723	7466.72	3672.84
38.205	7464.48	3670.63
38.2376	7466.08	3668.45
38.2702	7457.98	3673.56
38.3029	7450.54	3671.91
38.3355	7456.23	3670.77
38.3681	7447.65	3665.04
38.4008	7446.16	3661.08
38.4334	7446.35	3663.07
38.4661	7431.07	3658.94
38.4987	7433	3655.14
38.5313	7428.66	3658.71
38.564	7420.56	3658.59
38.5966	7419.32	3652.33
38.6292	7417.78	3656.82
38.6619	7408.89	3647.56
38.6945	7399.47	3644.79
38.7272	7403	3641.6
38.7598	7404.28	3643.86
38.7924	7395.3	3638.52
38.8251	7394.52	3636.54
38.8577	7394.39	3639.37
38.8903	7390.03	3635.97
38.923	7384.53	3630.77
38.9556	7379.1	3629.32
38.9883	7370.48	3634.91
39.0209	7369.1	3636.58
39.0535	7362.13	3629.22
39.0862	7358.85	3628.69
39.1188	7369	3619.39
39.1514	7367.15	3618.11
39.1841	7354.94	3611.1
39.2167	7350.19	3616.76
39.2493	7354.24	3615.84
39.282	7349.49	3612.16
39.3146	7353.66	3614.46
39.3473	7345.32	3608.87
39.3799	7333.63	3599.14
39.4125	7325.67	3599.67
39.4452	7319.43	3595.8
39.4778	7314.01	3594.06
39.5104	7304.98	3596.75
39.5431	7298.8	3593.62
39.5757	7298.25	3589.07
39.6084	7293.6	3587.67
39.641	7295.57	3590.26
39.6736	7285.57	3586.03
39.7063	7276.25	3580.59
39.7389	7278.62	3579.61
39.7715	7279.49	3577.8
39.8042	7276.56	3576.66
39.8368	7262.8	3575.07
39.8695	7261.27	3570.79
39.9021	7257.22	3566.27
39.9347	7253.37	3569.07
39.9674	7249.51	3569.9
40	7252.68	3561.48
40.0326	7251.36	3564.1
40.0653	7236.95	3557.99
40.0979	7225.61	3558.01
40.1305	7234.1	3556.21
40.1632	7228.15	3551.79
40.1958	7228.5	3552.85
40.2285	7225.38	3551.74
40.2611	7228.29	3553.45
40.2937	7224.61	3548.8
40.3264	7221.89	3553.24
40.359	7227.4	3549.76
40.3916	7212.54	3545.04
40.4243	7205.16	3540.92
40.4569	7194.89	3541.03
40.4896	7196.41	3540.19
40.5222	7187.6	3537.09
40.5548	7190.84	3537.73
40.5875	7178.17	3530.54
40.6201	7172.72	3534.08
40.6527	7169.69	3532.43
40.6854	7165.8	3529.77
40.718	7158.35	3525.89
40.7507	7161.86	3522.71
40.7833	7145.58	3529.89
40.8159	7146.91	3523.77
40.8486	7145.72	3525.32
40.8812	7144.14	3517.27
40.9138	7137.69	3515.68
40.9465	7137.16	3514.58
40.9791	7120.34	3509.67
41.0117	7117.56	3507.51
41.0444	7121.31	3508.01
41.077	7118.1	3505.57
41.1097	7114.12	3502.45
41.1423	7116.18	3502.34
41.1749	7111.85	3500.1
41.2076	7106.52	3502.65
41.2402	7104.77	3498.27
41.2728	7103.22	3490.38
41.3055	7099.89	3491.31
41.3381	7088.96	3486.57
41.3708	7088.02	3483.87
41.4034	7077.5	3483.14
41.436	7072.62	3473.85
41.4687	7076.77	3476.76
41.5013	7067.97	3473.46
41.5339	7051.61	3478.92
41.5666	7054.79	3469.29
41.5992	7042.18	3467.57
41.6319	7039.07	3465.19
41.6645	7037.33	3462.83
41.6971	7032.77	3461.88
41.7298	7027.22	3462.87
41.7624	7019.74	3462.75
41.795	7016.89	3456.01
41.8277	7010.51	3451.58
41.8603	7011.47	3456.69
41.893	7010.69	3450.48
41.9256	7005.2	3453.64
41.9582	7000.26	3452.28
41.9909	6999.2	3444.67
42.0235	6994.87	3443.2
42.0561	6986.04	3439.48
42.0888	6989.2	3437.47
42.1214	6977.7	3434.15
42.154	6976.56	3432.4
42.1867	6970.52	3431.48
42.2193	6970.1	3429.67
42.252	6970.47	3424.4
42.2846	6973.29	3423.43
42.3172	6971.8	3432.13
42.3499	6966.32	3428.74
42.3825	6965.53	3421.21
42.4151	6960.52	3423.58
42.4478	6962.67	3416.01
42.4804	6960.08	3416.93
42.5131	6947.21	3416.36
42.5457	6946.17	3412.25
42.5783	6941.76	3408.33
42.611	6940.95	3410.73
42.6436	6929.8	3402.15
42.6762	6928.12	3402.09
42.7089	6923.15	3405.71
42.7415	6918.78	3405.42
42.7742	6916.56	3401.49
42.8068	6905.05	3394.79
42.8394	6889.49	3393.11
42.8721	6886.75	3390.1
42.9047	6872.57	3386.45
42.9373	6873.72	3385.55
42.97	6865	3392.27
43.0026	6869.73	3387.13
43.0352	6863.62	3382.18
43.0679	6859.98	3381.88
43.1005	6853.78	3382.99
43.1332	6852.8	3374.62
43.1658	6844.48	3366.07
43.1984	6840.47	3366.74
43.2311	6839.39	3371.64
43.2637	6835.59	3364.47
43.2963	6827.12	3357.85
43.329	6822.85	3358.51
43.3616	6824.78	3360.34
43.3943	6820.26	3358.11
43.4269	6806.79	3355.4
43.4595	6806.81	3355.33
43.4922	6796.69	3351.45
43.5248	6795.61	3350.3
43.5574	6792.79	3353.05
43.5901	6789.94	3351.79
43.6227	6784.76	3346.13
43.6554	6783.07	3346.31
43.688	6781.2	3338.13
43.7206	6779.5	3338.63
43.7533	6771.38	3334.92
43.7859	6768.04	3333.86
43.8185	6757.93	3330.26
43.8512	6755.33	3326.11
43.8838	6743.85	3321.81
43.9164	6741.48	3320
43.9491	6743.61	3317.81
43.9817	6734.84	3316.94
44.0144	6736.02	3323.04
44.047	6733.17	3319.79
44.0796	6729.07	3313.33
44.1123	6722.6	3305.63
44.1449	6704.19	3302.93
44.1775	6707.59	3304.93
44.2102	6705.26	3306.28
44.2428	6697.62	3300.5
44.2755	6693.8	3290.93
44.3081	6692.71	3292.11
44.3407	6688.34	3285.09
44.3734	6681.41	3283.2
44.406	6672.98	3283.92
44.4386	6671.87	3283
44.4713	6669.78	3281.34
44.5039	6667.76	3279.92
44.5366	6667.94	3276.92
44.5692	6658.6	3275.57
44.6018	6650.55	3277.26
44.6345	6644.45	3265.88
44.6671	6637.34	3266.06
44.6997	6639.81	3265.22
44.7324	6635.94	3261.68
44.765	6627.3	3261.57
44.7977	6625.43	3254.87
44.8303	6623.86	3253.05
44.8629	6623.07	3246.06
44.8956	6614.78	3247.07
44.9282	6619.67	3243.39
44.9608	6607.08	3235.03
44.9935	6603.5	3234.91
45.0261	6604.28	3237.05
45.0587	6598.64	3230.16
45.0914	6589.68	3229.45
45.124	6587.41	3222.21
45.1567	6581.94	3228.82
45.1893	6581.18	3225.42
45.2219	6569.61	3221.54
45.2546	6566.22	3219.06
45.2872	6561.24	3210.35
45.3198	6563.98	3210.22
45.3525	6560.58	3211.94
45.3851	6557.24	3212.76
45.4178	6544.51	3208.06
45.4504	6534.3	3204.95
45.483	6534.9	3209.39
45.5157	6533.8	3205.77
45.5483	6526.06	3197.45
45.5809	6526.01	3194.93
45.6136	6520.57	3187.26
45.6462	6515.97	3184.78
45.6789	6508.76	3181.11
45.7115	6505.59	3181.79
45.7441	6494.25	3174.14
45.7768	6489.07	3177.52
45.8094	6493.9	3173.56
45.842	6494.77	3171.23
45.8747	6484.36	3166.25
45.9073	6479.64	3164.15
45.9399	6473.76	3163.49
45.9726	6468.44	3158.29
46.0052	6456.87	3163.08
46.0379	6458.75	3159.51
46.0705	6453.35	3151.18
46.1031	6452.41	3145.29
46.1358	6451.26	3145.83
46.1684	6445.38	3144.46
46.201	6425.78	3134.57
46.2337	6427.14	3134.55
46.2663	6421.55	3133.58
46.299	6420.83	3127.83
46.3316	6420.05	3126.17
46.3642	6409.35	3124.44
46.3969	6398.28	3120.68
46.4295	6396.29	3114.98
46.4621	6390.54	3113.3
46.4948	6386.31	3112.07
46.5274	6384.03	3109.76
46.5601	6379.7	3106.58
46.5927	6375.13	3100.28
46.6253	6364.58	3095.8
46.658	6357.61	3093.83
46.6906	6356.13	3096.13
46.7232	6351.14	3090.55
46.7559	6344.77	3088.31
46.7885	6341.98	3085.31
46.8211	6336.2	3082.79
46.8538	6340.18	3079.66
46.8864	6327.69	3069.57
46.9191	6323.67	3067.4
46.9517	6313.12	3066.71
46.9843	6309.43	3058.51
47.017	6314.14	3056.69
47.0496	6310.25	3054.49
47.0822	6303.83	3052.03
47.1149	6304.64	3050.91
47.1475	6292.07	3048.7
47.1802	6280.47	3044.49
47.2128	6280.6	3039.06
47.2454	6270.9	3035.88
47.2781	6277.94	3037.06
47.3107	6273.18	3033.78
47.3433	6265.87	3029.54
47.376	6257.07	3027.09
47.4086	6251.27	3026.79
47.4413	6244.1	3021.7
47.4739	6235.81	3025.56
47.5065	6229.04	3015.76
47.5392	6220.96	3013.86
47.5718	6220.6	3004.58
47.6044	6207.64	3007.83
47.6371	6201.8	3002.58
47.6697	6196.18	2996.94
47.7023	6187.25	2993.88
47.735	6193.72	2987.54
47.7676	6190.35	2987.39
47.8003	6183.08	2982.83
47.8329	6175.74	2976.31
47.8655	6170.76	2979.66
47.8982	6170.34	2974.6
47.9308	6170.53	2976.46
47.9634	6157.14	2967.93
47.9961	6154.3	2961.65
48.0287	6149.34	2959.58
48.0614	6151.75	2956.2
48.094	6149.53	2956.66
48.1266	6135.5	2954.27
48.1593	6123.8	2948.91
48.1919	6114.56	2945.26
48.2245	6112.8	2943.63
48.2572	6105.4	2939.21
48.2898	6106.04	2935.82
48.3225	6099.4	2933.66
48.3551	6096.69	2930.55
48.3877	6095.5	2926.54
48.4204	6088.92	2921.87
48.453	6092.22	2920.15
48.4856	6084.32	2915.75
48.5183	6074.1	2914.38
48.5509	6073.39	2914
48.5836	6074.16	2910.33
48.6162	6062.44	2907.64
48.6488	6057.8	2902.51
48.6815	6056.93	2893.11
48.7141	6050.86	2891.68
48.7467	6046.61	2896.63
48.7794	6043.35	2897.61
48.812	6037.89	2885.38
48.8446	6039.14	2884.84
48.8773	6042.11	2877.11
48.9099	6037.19	2877.28
48.9426	6038.54	2870.3
48.9752	6035.37	2865.56
49.0078	6033.72	2866.96
49.0405	6026.25	2865.6
49.0731	6021.52	2860.85
49.1057	6012.68	2861.28
49.1384	6008.15	2852.91
49.171	6007.96	2850.01
49.2037	6009.6	2845.45
49.2363	6011.93	2846
49.2689	5994.27	2840.97
49.3016	5976.97	2839.56
49.3342	5985.6	2833.4
49.3668	5981.01	2831.03
49.3995	5978.87	2834.67
49.4321	5970.57	2829.58
49.4648	5967.29	2822.55
49.4974	5962.87	2822.11
49.53	5954.95	2819.54
49.5627	5948.8	2814.92
49.5953	5956.2	2814.77
49.6279	5961.91	2810.85
49.6606	5948.42	2811.57
49.6932	5955.35	2808.61
49.7258	5950.42	2804.1
49.7585	5949.58	2797.7
49.7911	5946.94	2794.06
49.8238	5946.09	2785.94
49.8564	5935.37	2792.2
49.889	5934.26	2789.5
49.9217	5929.43	2785.82
49.9543	5932.29	2785.47
49.9869	5926.08	2785.7
50.0196	5919.59	2781.52
50.0522	5921.35	2778.07
50.0849	5926.84	2777.42
50.1175	5922.85	2773.43
50.1501	5926.85	2769.85
50.1828	5913.41	2767.61
50.2154	5915.05	2765.72
50.248	5917.69	2761.83
50.2807	5917.36	2758.88
50.3133	5911.68	2757.01
50.346	5910.66	2751.35
50.3786	5911.03	2757.63
50.4112	5916.57	2750.24
50.4439	5913.05	2750.34
50.4765	5917.55	2750.75
50.5091	5906.59	2746.16
50.5418	5913.25	2741.14
50.5744	5909.07	2742.89
50.607	5911.74	2739.56
50.6397	5906.43	2736.79
50.6723	5909.09	2732.44
50.705	5906.29	2729.94
50.7376	5905.39	2724.55
50.7702	5894.28	2730.85
50.8029	5900.07	2726.27
50.8355	5900.47	2725.51
50.8681	5906.44	2721.16
50.9008	5905.35	2721.94
50.9334	5906.48	2719.78
50.9661	5898.57	2723.46
50.9987	5901.92	2718.95
51.0313	5901.09	2718.59
51.064	5904.14	2710.1
51.0966	5900.37	2714.09
51.1292	5901.11	2709.44
51.1619	5905.4	2710.07
51.1945	5902.67	2706.16
51.2272	5893.6	2708.53
51.2598	5900.45	2705.43
51.2924	5904.94	2701.7
51.3251	5906.38	2697.22
51.3577	5896.46	2699.33
51.3903	5898.66	2698.78
51.423	5903.15	2696.09
51.4556	5906.56	2691.57
51.4883	5896.63	2692.79
51.5209	5898.59	2691.05
51.5535	5902.01	2687.7
51.5862	5906.4	2686.87
51.6188	5907.39	2687.49
51.6514	5904.33	2687.33
51.6841	5912.78	2685.95
51.7167	5914.69	2675.96
51.7493	5912.01	2674.89
51.782	5913.94	2673.76
51.8146	5912.81	2672.64
51.8473	5911.82	2672.9
51.8799	5916.15	2674.4
51.9125	5917.42	2671.53
51.9452	5908.81	2662.97
51.9778	5910.5	2666.94
52.0104	5911.67	2661.04
52.0431	5910.59	2661.35
52.0757	5917.6	2659.76
52.1084	5916.67	2663.89
52.141	5915.68	2663.21
52.1736	5916.08	2657.08
52.2063	5922.22	2652.35
52.2389	5918.97	2657.91
52.2715	5912.99	2657.18
52.3042	5919.27	2654.16
52.3368	5923.18	2652.27
52.3695	5919.28	2648.09
52.4021	5922.57	2646.14
52.4347	5919.8	2648.53
52.4674	5920.55	2649.63
52.5	5924.35	2641.05
52.5326	5932.53	2641.81
52.5653	5935.3	2641.43
52.5979	5937.42	2635.52
52.6305	5938.88	2637.15
52.6632	5942.62	2635.13
52.6958	5938.36	2639.19
52.7285	5935.66	2634.25
52.7611	5937.69	2633.33
52.7937	5939.43	2629.1
52.8264	5936.79	2628.1
52.859	5937.86	2623.63
52.8916	5941.53	2627.64
52.9243	5939.87	2623.8
52.9569	5940.61	2623.06
52.9896	5943.52	2620.88
53.0222	5934.86	2620.36
53.0548	5940.85	2618.33
53.0875	5940.27	2617.74
53.1201	5946.04	2612.73
53.1527	5944.26	2612.37
53.1854	5948.79	2609.48
53.218	5953.9	2608.28
53.2507	5951.84	2605.22
53.2833	5952.31	2605.5
53.3159	5956.17	2603.44
53.3486	5958.22	2603.7
53.3812	5960.91	2599.13
53.4138	5959.67	2602.75
53.4465	5962.34	2596.89
53.4791	5968.36	2599.76
53.5117	5968.67	2597.45
53.5444	5963.16	2596.48
53.577	5966.51	2593.4
53.6097	5964.59	2588.93
53.6423	5963.63	2591.16
53.6749	5975.74	2594.33
53.7076	5974.62	2595.14
53.7402	5976.76	2595.51
53.7728	5982.53	2590.43
53.8055	5983.11	2585.03
53.8381	5978.96	2586.6
53.8708	5984.5	2589.22
53.9034	5986.66	2585.35
53.936	5983.85	2580.48
53.9687	5985.26	2585.48
54.0013	5991.34	2579.77
54.0339	5993.35	2574.9
54.0666	5995.07	2573.61
54.0992	5998.58	2577.77
54.1319	5995.59	2577.07
54.1645	6007.48	2575.19
54.1971	6010.21	2571
54.2298	6006.98	2572.04
54.2624	6009.95	2570.28
54.295	6012.81	2570.69
54.3277	6010.6	2568.87
54.3603	6011.92	2568.86
54.393	6011.47	2565.39
54.4256	6013.31	2562.99
54.4582	6014.15	2563.13
54.4909	6013.36	2560.59
54.5235	6012.78	2557.43
54.5561	6015.1	2558.95
54.5888	6016.29	2554.81
54.6214	6023.54	2553.13
54.654	6027.05	2548.83
54.6867	6026.32	2555.07
54.7193	6026.93	2552.54
54.752	6027.73	2551.68
54.7846	6031.74	2549.39
54.8172	6035.84	2548.06
54.8499	6036.07	2543.2
54.8825	6037.59	2544.63
54.9151	6040.43	2541.84
54.9478	6036.06	2544.44
54.9804	6040.88	2541.12
55.0131	6041.24	2536.12
55.0457	6045.21	2537.77
55.0783	6047.24	2539.11
55.111	6053.57	2537.97
55.1436	6051.96	2535.15
55.1762	6052.23	2534.8
55.2089	6056.76	2532.18
55.2415	6059.76	2532.37
55.2742	6054.19	2530.16
55.3068	6056.43	2527.38
55.3394	6067.27	2528.62
55.3721	6066.09	2527.48
55.4047	6073.94	2522.86
55.4373	6069.45	2524.99
55.47	6064.31	2523
55.5026	6065.8	2523.4
55.5352	6078.84	2521.78
55.5679	6078.78	2519.05
55.6005	6076.76	2509.04
55.6332	6082.99	2512.3
55.6658	6084.79	2513.84
55.6984	6086.57	2514.59
55.7311	6085.92	2511.5
55.7637	6088.79	2508.61
55.7963	6092.05	2503.85
55.829	6095.21	2502.62
55.8616	6104.4	2504.54
55.8943	6105.77	2506.52
55.9269	6100.26	2507
55.9595	6107.22	2503.78
55.9922	6109.5	2504.12
56.0248	6110.89	2501.86
56.0574	6112.12	2498.13
56.0901	6116.7	2494.42
56.1227	6120.23	2491.22
56.1554	6119.65	2491.22
56.188	6123.45	2491.48
56.2206	6125.03	2494.11
56.2533	6124.81	2491.78
56.2859	6128.29	2486.38
56.3185	6127.84	2483.59
56.3512	6133.5	2488.15
56.3838	6141.33	2486.56
56.4164	6132.36	2484.83
56.4491	6138.49	2480.14
56.4817	6136.65	2482.46
56.5144	6145.17	2479.69
56.547	6149.06	2478.34
56.5796	6159.72	2476.64
56.6123	6150.87	2480.26
56.6449	6150.71	2472.7
56.6775	6160.1	2473.36
56.7102	6162.41	2471.69
56.7428	6159.6	2473.72
56.7755	6163.15	2469.51
56.8081	6156.01	2471.62
56.8407	6164.08	2469.38
56.8734	6162.63	2464.12
56.906	6166.02	2465.84
56.9386	6178.11	2464.71
56.9713	6180.26	2462.57
57.0039	6180.33	2459.98
57.0366	6184.25	2458.45
57.0692	6188.97	2458.48
57.1018	6194.52	2454.67
57.1345	6188.19	2458.38
57.1671	6189.19	2454.81
57.1997	6195.76	2453.19
57.2324	6201.74	2450.73
57.265	6203.54	2453.64
57.2977	6206.28	2450.59
57.3303	6207.58	2448.57
57.3629	6211.02	2447.34
57.3956	6217.35	2444.73
57.4282	6217.87	2443.79
57.4608	6222.99	2441.71
57.4935	6220.05	2440.55
57.5261	6223.24	2434.94
57.5587	6228.77	2438.46
57.5914	6228.67	2435.92
57.624	6225.64	2436.15
57.6567	6227.49	2435.27
57.6893	6233.31	2433.49
57.7219	6235.2	2433.56
57.7546	6238.15	2427.3
57.7872	6239.88	2425.52
57.8198	6244.88	2423.51
57.8525	6247.99	2419.4
57.8851	6245.04	2423.98
57.9178	6253.35	2421.55
57.9504	6249.19	2422.91
57.983	6257.3	2418.89
58.0157	6254.11	2421.62
58.0483	6261.99	2418.82
58.0809	6268.89	2412.87
58.1136	6271.63	2412.47
58.1462	6274.03	2411.27
58.1789	6277.3	2410.37
58.2115	6279.51	2412.38
58.2441	6283.35	2410.84
58.2768	6279.65	2406.54
58.3094	6289.89	2402.99
58.342	6284.89	2405.46
58.3747	6290.44	2407.51
58.4073	6300.16	2402.84
58.4399	6298.33	2400.05
58.4726	6303.51	2402.17
58.5052	6307.24	2396.37
58.5379	6306.49	2401.64
58.5705	6314.42	2397.84
58.6031	6315.21	2393.91
58.6358	6315.75	2392.65
58.6684	6319.67	2394.22
58.701	6321.51	2394.64
58.7337	6326.55	2392
58.7663	6331.74	2389.38
58.799	6339.53	2382.51
58.8316	6340.2	2382.88
58.8642	6336.68	2390.12
58.8969	6338.28	2384.84
58.9295	6326.74	2380.64
58.9621	6337.49	2380.65
58.9948	6343.75	2383.09
59.0274	6349.81	2381.6
59.0601	6348.13	2380.53
59.0927	6345.42	2375.36
59.1253	6349.19	2372.24
59.158	6352.03	2373.25
59.1906	6352.05	2371.47
59.2232	6351.06	2365.76
59.2559	6353.22	2367.68
59.2885	6355.84	2369.22
59.3211	6356.52	2366.24
59.3538	6358.05	2361.72
59.3864	6363.53	2362.22
59.4191	6365.86	2360.42
59.4517	6370.08	2359.84
59.4843	6373.02	2357.64
59.517	6373.92	2354.03
59.5496	6368.82	2353.97
59.5822	6368.79	2352.56
59.6149	6373.5	2350.56
59.6475	6372.65	2347.74
59.6802	6374.95	2345.81
59.7128	6381.99	2345.74
59.7454	6385.69	2349.23
59.7781	6388.92	2347.11
59.8107	6388.2	2344.92
59.8433	6386.81	2345.66
59.876	6385.29	2345.76
59.9086	6385.69	2342.14
59.9413	6398.98	2338.75
59.9739	6394.09	2338.47
60.0065	6403.66	2335.47
60.0392	6408.87	2336.51
60.0718	6407.76	2331.77
60.1044	6405.08	2330.62
60.1371	6419.22	2329.66
60.1697	6424.54	2327.48
60.2023	6422.07	2332.8
60.235	6421.66	2329.29
60.2676	6415.63	2326.15
60.3003	6412.34	2326.34
60.3329	6421.15	2324.37
60.3655	6422.13	2325.69
60.3982	6423.12	2320.59
60.4308	6424.66	2319.71
60.4634	6428.52	2318.62
60.4961	6437.87	2313.22
60.5287	6427.18	2316.93
60.5614	6429.93	2312.03
60.594	6439.51	2307.63
60.6266	6442.9	2306.4
60.6593	6444.39	2308.48
60.6919	6443.73	2305.15
60.7245	6448.06	2304.14
60.7572	6449.6	2305.56
60.7898	6447.45	2304.1
60.8225	6442.18	2297.23
60.8551	6453.11	2300.17
60.8877	6456.92	2302.5
60.9204	6456.76	2299.28
60.953	6460.75	2298.23
60.9856	6462.68	2300
61.0183	6459.07	2297.06
61.0509	6465.02	2293.02
61.0836	6462.99	2292.29
61.1162	6466.22	2294.71
61.1488	6467.18	2288.12
61.1815	6462.36	2289.19
61.2141	6468.15	2287.2
61.2467	6468.37	2283.52
61.2794	6470.01	2283.43
61.312	6475.5	2278.59
61.3446	6480.8	2275.71
61.3773	6484.45	2282.15
61.4099	6477.76	2275.86
61.4426	6480.57	2278.02
61.4752	6480.71	2273.79
61.5078	6480.29	2277.55
61.5405	6483.16	2274.65
61.5731	6478.23	2270.07
61.6057	6479.94	2268.07
61.6384	6480.83	2271.59
61.671	6486.21	2266.58
61.7037	6487.08	2266.21
61.7363	6486.1	2264.27
61.7689	6487.48	2267.66
61.8016	6491.57	2263.79
61.8342	6487.55	2262.18
61.8668	6485.03	2262.17
61.8995	6487.86	2258.7
61.9321	6492.63	2257.93
61.9648	6489.6	2255.17
61.9974	6489.14	2252.57
62.03	6493.87	2251.74
62.0627	6492.23	2250.45
62.0953	6497	2250.97
62.1279	6493.59	2247.04
62.1606	6488.72	2247.59
62.1932	6488.92	2242.96
62.2258	6489.74	2243.63
62.2585	6491.97	2243.7
62.2911	6493.18	2239.19
62.3238	6491.82	2239.21
62.3564	6489.55	2238.87
62.389	6491.8	2234.11
62.4217	6497.58	2231.34
62.4543	6490.83	2236.33
62.4869	6492.34	2231.64
62.5196	6494.9	2233.41
62.5522	6499.22	2228.53
62.5849	6491.07	2226.47
62.6175	6485.98	2228.12
62.6501	6491.69	2230.29
62.6828	6491.83	2227.61
62.7154	6491.72	2226.51
62.748	6491.77	2223.33
62.7807	6486.12	2221.6
62.8133	6488.27	2222.23
62.846	6492.21	2219.64
62.8786	6492.11	2218.54
62.9112	6493.4	2220.74
62.9439	6492.34	2216.63
62.9765	6485.89	2212.29
63.0091	6490.55	2208.92
63.0418	6492.85	2212.88
63.0744	6489.8	2209.82
63.107	6486.69	2214.35
63.1397	6490.88	2208.57
63.1723	6487.38	2204.38
63.205	6492.57	2203.68
63.2376	6491.43	2202.42
63.2702	6490.91	2200.3
63.3029	6486.75	2204.01
63.3355	6489.44	2197.81
63.3681	6486.41	2200.27
63.4008	6487.26	2196.71
63.4334	6477.34	2202.05
63.4661	6479.3	2195.96
63.4987	6476.54	2188.84
63.5313	6479.1	2187.67
63.564	6483.97	2192.6
63.5966	6480.9	2189.39
63.6292	6475.64	2185.81
63.6619	6475.82	2182.02
63.6945	6476.02	2179.41
63.7272	6477.34	2183.7
63.7598	6482.79	2182.84
63.7924	6474.81	2180.57
63.8251	6471.51	2179.24
63.8577	6471.09	2176
63.8903	6467.65	2177.05
63.923	6466.75	2175.43
63.9556	6467.8	2169.08
63.9883	6469.14	2172
64.0209	6473.71	2170.03
64.0535	6473.29	2167.89
64.0862	6472.55	2168.39
64.1188	6459.6	2169.59
64.1514	6463.22	2165.02
64.1841	6465.91	2161.49
64.2167	6461.5	2160.1
64.2493	6459.25	2162.57
64.282	6459.49	2160.03
64.3146	6451.79	2162.69
64.3473	6452.46	2158.72
64.3799	6461.34	2156.88
64.4125	6454.86	2156.25
64.4452	6447.1	2155.5
64.4778	6450.12	2149.87
64.5104	6452.43	2153.4
64.5431	6450.41	2151.12
64.5757	6446.39	2151.5
64.6084	6446.23	2147.5
64.641	6446.28	2147.23
64.6736	6449.7	2145.09
64.7063	6438.06	2143.16
64.7389	6441.63	2135.65
64.7715	6433.4	2140.4
64.8042	6431.55	2142.55
64.8368	6441.16	2139.74
64.8695	6436.42	2137.32
64.9021	6432.09	2133.04
64.9347	6430.48	2130.74
64.9674	6425.81	2131.1
65	6427.27	2127.14
65.0326	6418.22	2126.81
65.0653	6423.31	2124.8
65.0979	6408.79	2127.88
65.1305	6410.79	2125.16
65.1632	6412.71	2118.48
65.1958	6407.7	2118.01
65.2285	6418.76	2123.13
65.2611	6413.22	2122.58
65.2937	6404.64	2120.78
65.3264	6405.01	2117.18
65.359	6406.5	2113.32
65.3916	6406.88	2111.81
65.4243	6407.08	2112.04
65.4569	6395.88	2114.7
65.4896	6396.37	2113.79
65.5222	6393.95	2108.57
65.5548	6387.55	2106.24
65.5875	6388.95	2111.73
65.6201	6391.59	2108.03
65.6527	6380.12	2100.31
65.6854	6383.69	2097.63
65.718	6375.61	2102.72
65.7507	6372.57	2100.34
65.7833	6372.02	2097.6
65.8159	6369.33	2096.64
65.8486	6371.39	2095.12
65.8812	6369.59	2092.46
65.9138	6361.17	2093.63
65.9465	6358.63	2090.04
65.9791	6360.58	2089.16
66.0117	6356.4	2088.8
66.0444	6351.64	2088.7
66.077	6348.11	2087.71
66.1097	6357.41	2089.78
66.1423	6355.67	2085.18
66.1749	6350.8	2086.95
66.2076	6347.28	2085.3
66.2402	6337.49	2081.6
66.2728	6341.36	2077.87
66.3055	6339.9	2077.21
66.3381	6338.75	2073.99
66.3708	6321.41	2076.09
66.4034	6323.3	2073.65
66.436	6326.92	2072.8
66.4687	6327.02	2068.34
66.5013	6316.69	2071.68
66.5339	6313.55	2069.05
66.5666	6307.72	2072.06
66.5992	6310.85	2067.72
66.6319	6308.09	2066.92
66.6645	6310.96	2064.56
66.6971	6299.52	2061.06
66.7298	6297.45	2059.73
66.7624	6291.02	2058.48
66.795	6293.35	2056.45
66.8277	6285.61	2056.87
66.8603	6287.44	2053.41
66.893	6289.17	2053.54
66.9256	6290.53	2050.25
66.9582	6285.79	2053.13
66.9909	6284.43	2049.5
67.0235	6282.1	2049.47
67.0561	6275.12	2047.9
67.0888	6268.76	2046.99
67.1214	6268.84	2046.23
67.154	6265.72	2046.27
67.1867	6261.82	2044.69
67.2193	6258.78	2040.5
67.252	6257.13	2040.37
67.2846	6256.21	2039.96
67.3172	6251.91	2036.67
67.3499	6244.83	2036.31
67.3825	6247.06	2036.65
67.4151	6241.85	2034.32
67.4478	6237.47	2033.78
67.4804	6240.42	2033.45
67.5131	6234.14	2028.31
67.5457	6233.08	2028.27
67.5783	6234.1	2028.78
67.611	6236.21	2025.91
67.6436	6223.47	2024.18
67.6762	6223.48	2022.25
67.7089	6221.71	2020
67.7415	6223.52	2018.4
67.7742	6217.88	2020.14
67.8068	6212.81	2018.81
67.8394	6209.9	2021.66
67.8721	6207.44	2018.67
67.9047	6195.32	2014.27
67.9373	6194.02	2008.49
67.97	6193.16	2012.44
68.0026	6191.52	2009.67
68.0352	6193.68	2009.47
68.0679	6188.27	2006.19
68.1005	6183.97	2007.74
68.1332	6182.37	2006.02
68.1658	6181.19	2001.29
68.1984	6176.27	1999.61
68.2311	6163.58	2000.02
68.2637	6165.61	2000.96
68.2963	6161.5	1999
68.329	6168.75	1997.26
68.3616	6153.36	1994.85
68.3943	6154.47	1991.26
68.4269	6151.29	1991.18
68.4595	6145.67	1990.54
68.4922	6143.1	1995.63
68.5248	6146.62	1993.49
68.5574	6149.23	1988.41
68.5901	6142.29	1985.69
68.6227	6132.44	1985.64
68.6554	6136.28	1983.32
68.688	6129.28	1986.66
68.7206	6127.12	1983.76
68.7533	6117.4	1981.48
68.7859	6117.36	1979.1
68.8185	6112.39	1980.1
68.8512	6109.46	1977.68
68.8838	6108.77	1978.36
68.9164	6106.09	1976.08
68.9491	6103.87	1968.96
68.9817	6105.99	1967.06
69.0144	6093.9	1973.19
69.047	6093.88	1970.26
69.0796	6093.29	1972.85
69.1123	6088.69	1967.54
69.1449	6091.1	1970.67
69.1775	6082.26	1967.62
69.2102	6073.6	1961.48
69.2428	6072.48	1961.89
69.2755	6065.4	1963.37
69.3081	6071.24	1959.28
69.3407	6059.22	1954.14
69.3734	6060.97	1952.49
69.406	6060.33	1958.9
69.4386	6057.05	1954.29
69.4713	6053.1	1952.56
69.5039	6050.13	1952.95
69.5366	6043.83	1955.21
69.5692	6038.96	1951.18
69.6018	6039.14	1953.31
69.6345	6032.85	1946.21
69.6671	6032.16	1951.45
69.6997	6029.27	1945.57
69.7324	6032.37	1943.99
69.765	6026.82	1943.57
69.7977	6023.4	1936.69
69.8303	6024.62	1935.19
69.8629	6012.82	1939.76
69.8956	6010.17	1936.84
69.9282	6003.1	1937.76
69.9608	6006.98	1934.9
69.9935	6012.18	1930.5
70.0261	6008.32	1929.23
70.0587	5999.65	1928.94
70.0914	5996.1	1930.75
70.124	5976.06	1928.31
70.1567	5981.62	1928.22
70.1893	5985.57	1926.43
70.2219	5984.64	1924.37
70.2546	5975.96	1924.87
70.2872	5971.12	1924.09
70.3198	5969.57	1923.22
70.3525	5968.58	1922.18
70.3851	5965.44	1920.99
70.4178	5959.57	1919.33
70.4504	5955.44	1916.37
70.483	5953.97	1913.57
70.5157	5953.76	1913.82
70.5483	5946.03	1914.83
70.5809	5939.1	1913.82
70.6136	5938.22	1912.93
70.6462	5937.83	1909.78
70.6789	5934.12	1905.48
70.7115	5927.1	1902.45
70.7441	5919.65	1906.04
70.7768	5911.36	1905.16
70.8094	5922.29	1904.47
70.842	5926.5	1904.08
70.8747	5908.48	1900.18
70.9073	5907.86	1897.66
70.9399	5903.21	1899.11
70.9726	5895.15	1895.22
71.0052	5899.84	1894.18
71.0379	5893.59	1889.82
71.0705	5887.05	1892.79
71.1031	5887.58	1886.9
71.1358	5883.33	1890.4
71.1684	5880.33	1887.27
71.201	5875.44	1889.51
71.2337	5873.43	1885.03
71.2663	5868.11	1881.98
71.299	5863.15	1877.56
71.3316	5862.47	1882.6
71.3642	5859.87	1882.01
71.3969	5853.87	1880.16
71.4295	5852.08	1875.12
71.4621	5844.08	1874.46
71.4948	5846.11	1873.54
71.5274	5847.29	1875.21
71.5601	5837.17	1873.49
71.5927	5826.29	1877.27
71.6253	5822.39	1871.51
71.658	5827.71	1872.79
71.6906	5826.59	1867.89
71.7232	5818.68	1869.89
71.7559	5816.83	1870.35
71.7885	5806.14	1867.18
71.8211	5805.51	1864.56
71.8538	5806.97	1863.71
71.8864	5801.45	1863.44
71.9191	5784	1866.75
71.9517	5791.03	1861.42
71.9843	5795.48	1856.5
72.017	5788.72	1857.64
72.0496	5781.42	1860.12
72.0822	5781.32	1856.69
72.1149	5779.75	1853.82
72.1475	5775.75	1853.2
72.1802	5764.09	1856.78
72.2128	5761.81	1854.06
72.2454	5764.58	1848.76
72.2781	5764.8	1847.02
72.3107	5754.01	1845.63
72.3433	5753.71	1848.67
72.376	5751.67	1848.4
72.4086	5748.79	1841.85
72.4413	5749.9	1840.16
72.4739	5750.36	1840.95
72.5065	5749.62	1834.65
72.5392	5742.11	1837.81
72.5718	5741.52	1838.35
72.6044	5730	1838.37
72.6371	5726.46	1834.79
72.6697	5725.03	1835.34
72.7023	5720.54	1831.75
72.735	5720.84	1832.47
72.7676	5716.37	1833.31
72.8003	5712.93	1827.96
72.8329	5707.24	1827.35
72.8655	5699.93	1827.81
72.8982	5697.72	1821.56
72.9308	5695.69	1827.06
72.9634	5695.67	1827.25
72.9961	5691.01	1821.93
73.0287	5693.15	1820.07
73.0614	5684.55	1817.46
73.094	5684.86	1816.52
73.1266	5670.47	1819.04
73.1593	5666.31	1814.71
73.1919	5666.84	1815.68
73.2245	5661.18	1812.63
73.2572	5664.16	1813.3
73.2898	5654.78	1811.87
73.3225	5657.27	1812.42
73.3551	5647.8	1809.68
73.3877	5652.36	1808.85
73.4204	5651.18	1805.61
73.453	5641.35	1806
73.4856	5639.18	1802.47
73.5183	5632.19	1800.08
73.5509	5629.76	1801.45
73.5836	5620.24	1802.56
73.6162	5622.64	1799.01
73.6488	5616.08	1796.56
73.6815	5617.58	1793.38
73.7141	5619.16	1796.67
73.7467	5611.84	1794.35
73.7794	5610.15	1795.51
73.812	5608.1	1795.06
73.8446	5599.49	1791.01
73.8773	5596.9	1789.68
73.9099	5594.43	1789.54
73.9426	5592.12	1788.41
73.9752	5582.1	1785.5
74.0078	5580.07	1786.39
74.0405	5584.77	1786.95
74.0731	5580.6	1782.84
74.1057	5572.68	1778.73
74.1384	5567.23	1782.18
74.171	5563.61	1776.69
74.2037	5562.87	1777.26
74.2363	5563.59	1776.86
74.2689	5551.35	1775.27
74.3016	5553.71	1775.7
74.3342	5544.11	1770.67
74.3668	5540.67	1769.17
74.3995	5535.1	1773.03
74.4321	5532.46	1767.85
74.4648	5535.61	1766.93
74.4974	5534.87	1763.69
74.53	5528.86	1767.48
74.5627	5532.31	1765.5
74.5953	5517.1	1761.18
74.6279	5518.1	1762.5
74.6606	5513.66	1762.49
74.6932	5509.33	1760.95
74.7258	5500.03	1754.98
74.7585	5500.96	1756.04
74.7911	5494.62	1757.23
74.8238	5492.51	1758.1
74.8564	5490.92	1758.76
74.889	5492.11	1756.01
74.9217	5486.91	1749.38
74.9543	5485.11	1749.39
74.9869	5477.63	1751.16
75.0196	5475.4	1748.2
75.0522	5472.62	1748.79
75.0849	5469.26	1750.08
75.1175	5466.55	1747.38
75.1501	5452.52	1740.55
75.1828	5454.32	1740.33
75.2154	5454.26	1742.52
75.248	5454.65	1737.77
75.2807	5446.63	1741.81
75.3133	5442.91	1738.14
75.346	5439.01	1733.76
75.3786	5438.79	1732.38
75.4112	5428.63	1741.04
75.4439	5426.81	1737.81
75.4765	5417.19	1736.91
75.5091	5417.65	1734.75
75.5418	5410.66	1731.61
75.5744	5412.73	1726.38
75.607	5408.56	1729.06
75.6397	5410.34	1725.83
75.6723	5401.08	1728.53
75.705	5397.36	1725.7
75.7376	5393.13	1725.47
75.7702	5394.35	1723.6
75.8029	5385.79	1719.59
75.8355	5382.61	1719.5
75.8681	5379.05	1721.39
75.9008	5378.08	1718.8
75.9334	5377.86	1718.9
75.9661	5375.51	1716.16
75.9987	5373.28	1713.3
76.0313	5369.37	1711.96
76.064	5368.24	1712.61
76.0966	5365.19	1713.94
76.1292	5358.24	1713.15
76.1619	5348.65	1708.89
76.1945	5347.36	1707.35
76.2272	5343.65	1705.1
76.2598	5336.4	1702.21
76.2924	5338.63	1706.97
76.3251	5335.1	1706.32
76.3577	5325.99	1707.69
76.3903	5325.76	1705.9
76.423	5323.69	1706.33
76.4556	5320.38	1703.83
76.4883	5316.03	1706.7
76.5209	5310.43	1701.59
76.5535	5307.22	1701.4
76.5862	5306.27	1703
76.6188	5301.74	1702.89
76.6514	5298.08	1699.84
76.6841	5295.41	1697.61
76.7167	5290.96	1699.7
76.7493	5284.58	1700.92
76.782	5284	1697.14
76.8146	5280.74	1697.75
76.8473	5280.16	1693.03
76.8799	5273.52	1689.48
76.9125	5266.47	1695.9
76.9452	5264.06	1691.7
76.9778	5267.63	1689.33
77.0104	5261.48	1685.69
77.0431	5252.66	1680.78
77.0757	5250.57	1680.47
77.1084	5245.48	1686.81
77.141	5243.95	1682
77.1736	5243.23	1681.43
77.2063	5238.19	1680.01
77.2389	5229.14	1678.67
77.2715	5225.33	1677.85
77.3042	5227.44	1676.83
77.3368	5222.88	1674.53
77.3695	5218.43	1672.25
77.4021	5217.87	1670.3
77.4347	5215.82	1669.23
77.4674	5207.8	1666.82
77.5	5207.29	1666.49
77.5326	5201.99	1667.53
77.5653	5200.37	1666.41
77.5979	5197.82	1665.53
77.6305	5196.3	1662.09
77.6632	5188.45	1660.06
77.6958	5185.55	1654.55
77.7285	5174.74	1657.7
77.7611	5169.56	1657.09
77.7937	5177.75	1653.99
77.8264	5182.66	1655.32
77.859	5173.11	1654.09
77.8916	5173.38	1652.43
77.9243	5162.41	1650.62
77.9569	5160.61	1650.12
77.9896	5157.56	1649.06
78.0222	5154.65	1651.23
78.0548	5142	1646.35
78.0875	5142.7	1643.17
78.1201	5137.67	1645.62
78.1527	5136.69	1642.19
78.1854	5133.76	1644.04
78.218	5129.67	1644.63
78.2507	5124.4	1639.61
78.2833	5121.63	1641.56
78.3159	5117.98	1639.83
78.3486	5115.38	1635.42
78.3812	5113.67	1636.67
78.4138	5112.65	1635.75
78.4465	5104.99	1631.09
78.4791	5104.92	1629.92
78.5117	5098.37	1630.03
78.5444	5093.48	1631.41
78.577	5089.29	1629.26
78.6097	5092.61	1628.16
78.6423	5090.48	1629.49
78.6749	5084.89	1625.58
78.7076	5079.67	1620.86
78.7402	5067.49	1626.45
78.7728	5062.09	1623.97
78.8055	5068.6	1622.69
78.8381	5067.29	1621.58
78.8708	5061.62	1621.47
78.9034	5057.73	1617.75
78.936	5052.82	1619.62
78.9687	5051.67	1616.84
79.0013	5041.23	1618.9
79.0339	5041.86	1616.39
79.0666	5036.97	1617.9
79.0992	5035.27	1613.43
79.1319	5032.51	1610.21
79.1645	5030.29	1614.31
79.1971	5022.79	1613.23
79.2298	5022.3	1610.49
79.2624	5019.41	1612.58
79.295	5013.87	1608.09
79.3277	5008.22	1606.97
79.3603	5004.76	1607.02
79.393	5007.77	1605.1
79.4256	5002.63	1603.84
79.4582	4997.71	1603.51
79.4909	4996.71	1602.93
79.5235	4995.1	1600.83
79.5561	4984.22	1601.82
79.5888	4984.48	1601.42
79.6214	4984.6	1598.61
79.654	4981.72	1595.53
79.6867	4972.28	1596.32
79.7193	4976.09	1595.38
79.752	4965.2	1595.41
79.7846	4961.97	1591.98
79.8172	4958.65	1591.04
79.8499	4953.32	1588.08
79.8825	4950.43	1591.27
79.9151	4954.34	1588.83
79.9478	4946.59	1586.05
79.9804	4940.63	1586
80.0131	4940.35	1588.8
80.0457	4937.39	1585.97
80.0783	4934.58	1585.05
80.111	4928.4	1580.4
80.1436	4925.03	1586.43
80.1762	4921.87	1584.89
[truncated: 301 more rows]

## Sheet: Fig1-S1A 330 nm(1st derivative)
	First derivative of fluorescence counts at 330 nm
Temperature, °C	VPS34-CII WT	mCherry-VPS34-CII WT
15	-233.586	-47.6813
15.0326	-232.961	-47.8622
15.0653	-232.338	-48.0434
15.0979	-231.715	-48.2248
15.1305	-231.093	-48.4064
15.1632	-230.473	-48.5882
15.1958	-229.854	-48.7702
15.2285	-229.236	-48.9524
15.2611	-228.62	-49.1348
15.2937	-228.004	-49.3174
15.3264	-227.391	-49.5001
15.359	-226.778	-49.6831
15.3916	-226.168	-49.8663
15.4243	-225.558	-50.0496
15.4569	-224.95	-50.233
15.4896	-224.344	-50.4167
15.5222	-223.74	-50.6005
15.5548	-223.137	-50.7844
15.5875	-222.535	-50.9684
15.6201	-221.936	-51.1526
15.6527	-221.338	-51.3368
15.6854	-220.742	-51.5212
15.718	-220.147	-51.7057
15.7507	-219.554	-51.8902
15.7833	-218.964	-52.0748
15.8159	-218.375	-52.2594
15.8486	-217.787	-52.4442
15.8812	-217.202	-52.6289
15.9138	-216.618	-52.8137
15.9465	-216.037	-52.9985
15.9791	-215.457	-53.1833
16.0117	-214.879	-53.3681
16.0444	-214.302	-53.5529
16.077	-213.728	-53.7377
16.1097	-213.155	-53.9225
16.1423	-212.584	-54.1073
16.1749	-212.014	-54.292
16.2076	-211.446	-54.4767
16.2402	-210.88	-54.6613
16.2728	-210.315	-54.8459
16.3055	-209.752	-55.0304
16.3381	-209.19	-55.2149
16.3708	-208.629	-55.3993
16.4034	-208.07	-55.5836
16.436	-207.512	-55.7678
16.4687	-206.955	-55.952
16.5013	-206.4	-56.1361
16.5339	-205.845	-56.32
16.5666	-205.292	-56.5039
16.5992	-204.739	-56.6878
16.6319	-204.188	-56.8715
16.6645	-203.637	-57.0551
16.6971	-203.086	-57.2386
16.7298	-202.537	-57.4221
16.7624	-201.988	-57.6055
16.795	-201.439	-57.7888
16.8277	-200.89	-57.972
16.8603	-200.342	-58.1552
16.893	-199.794	-58.3384
16.9256	-199.246	-58.5216
16.9582	-198.697	-58.7047
16.9909	-198.149	-58.8879
17.0235	-197.599	-59.0711
17.0561	-197.049	-59.2545
17.0888	-196.499	-59.4379
17.1214	-195.947	-59.6215
17.154	-195.394	-59.8053
17.1867	-194.84	-59.9895
17.2193	-194.284	-60.174
17.252	-193.727	-60.3589
17.2846	-193.168	-60.5444
17.3172	-192.607	-60.7306
17.3499	-192.044	-60.9176
17.3825	-191.481	-61.1056
17.4151	-190.916	-61.2949
17.4478	-190.35	-61.4856
17.4804	-189.786	-61.678
17.5131	-189.223	-61.8723
17.5457	-188.664	-62.0688
17.5783	-188.117	-62.2667
17.611	-187.701	-62.4491
17.6436	-187.293	-62.6293
17.6762	-186.893	-62.8069
17.7089	-186.502	-62.9817
17.7415	-186.12	-63.1535
17.7742	-185.747	-63.3221
17.8068	-185.383	-63.4872
17.8394	-185.028	-63.6487
17.8721	-184.682	-63.8064
17.9047	-184.345	-63.96
17.9373	-184.017	-64.1095
17.97	-183.699	-64.2547
18.0026	-183.389	-64.3953
18.0352	-183.088	-64.5314
18.0679	-182.796	-64.6628
18.1005	-182.512	-64.7895
18.1332	-182.236	-64.9114
18.1658	-181.969	-65.0284
18.1984	-181.71	-65.1405
18.2311	-181.458	-65.2477
18.2637	-181.213	-65.3501
18.2963	-180.975	-65.4476
18.329	-180.743	-65.5404
18.3616	-180.517	-65.6285
18.3943	-180.297	-65.7121
18.4269	-180.081	-65.7911
18.4595	-179.871	-65.8658
18.4922	-179.664	-65.9363
18.5248	-179.46	-66.0027
18.5574	-179.26	-66.0651
18.5901	-179.062	-66.1238
18.6227	-178.867	-66.179
18.6554	-178.673	-66.2307
18.688	-178.481	-66.2792
18.7206	-178.29	-66.3246
18.7533	-178.099	-66.3671
18.7859	-177.91	-66.4069
18.8185	-177.72	-66.4442
18.8512	-177.531	-66.4791
18.8838	-177.341	-66.5118
18.9164	-177.151	-66.5425
18.9491	-176.961	-66.5714
18.9817	-176.77	-66.5985
19.0144	-176.578	-66.6242
19.047	-176.385	-66.6484
19.0796	-176.192	-66.6715
19.1123	-175.998	-66.6934
19.1449	-175.802	-66.7144
19.1775	-175.606	-66.7345
19.2102	-175.409	-66.7539
19.2428	-175.21	-66.7725
19.2755	-175.011	-66.7905
19.3081	-174.81	-66.8079
19.3407	-174.608	-66.8248
19.3734	-174.406	-66.841
19.406	-174.202	-66.8567
19.4386	-173.997	-66.8717
19.4713	-173.792	-66.8862
19.5039	-173.586	-66.8999
19.5366	-173.379	-66.9129
19.5692	-173.172	-66.925
19.6018	-172.964	-66.9363
19.6345	-172.756	-66.9465
19.6671	-172.548	-66.9555
19.6997	-172.339	-66.9632
19.7324	-172.131	-66.9696
19.765	-171.922	-66.9743
19.7977	-171.713	-66.9774
19.8303	-171.504	-66.9786
19.8629	-171.296	-66.9778
19.8956	-171.087	-66.9749
19.9282	-170.879	-66.9698
19.9608	-170.671	-66.9623
19.9935	-170.464	-66.9523
20.0261	-170.256	-66.9398
20.0587	-170.05	-66.9247
20.0914	-169.844	-66.9069
20.124	-169.638	-66.8863
20.1567	-169.433	-66.863
20.1893	-169.229	-66.8368
20.2219	-169.025	-66.8078
20.2546	-168.822	-66.7761
20.2872	-168.619	-66.7416
20.3198	-168.418	-66.7044
20.3525	-168.217	-66.6647
20.3851	-168.017	-66.6224
20.4178	-167.818	-66.5778
20.4504	-167.619	-66.5309
20.483	-167.422	-66.482
20.5157	-167.225	-66.4313
20.5483	-167.029	-66.3788
20.5809	-166.834	-66.3248
20.6136	-166.639	-66.2696
20.6462	-166.446	-66.2133
20.6789	-166.253	-66.1562
20.7115	-166.061	-66.0985
20.7441	-165.87	-66.0404
20.7768	-165.679	-65.9823
20.8094	-165.489	-65.9243
20.842	-165.3	-65.8667
20.8747	-165.111	-65.8099
20.9073	-164.923	-65.754
20.9399	-164.735	-65.6992
20.9726	-164.548	-65.646
21.0052	-164.361	-65.5944
21.0379	-164.175	-65.5447
21.0705	-163.989	-65.4972
21.1031	-163.803	-65.4521
21.1358	-163.617	-65.4095
21.1684	-163.432	-65.3696
21.201	-163.247	-65.3327
21.2337	-163.062	-65.2987
21.2663	-162.878	-65.268
21.299	-162.694	-65.2404
21.3316	-162.51	-65.2162
21.3642	-162.326	-65.1953
21.3969	-162.143	-65.1778
21.4295	-161.96	-65.1636
21.4621	-161.778	-65.1528
21.4948	-161.596	-65.1452
21.5274	-161.415	-65.1408
21.5601	-161.235	-65.1395
21.5927	-161.055	-65.1411
21.6253	-160.876	-65.1455
21.658	-160.698	-65.1524
21.6906	-160.521	-65.1618
21.7232	-160.345	-65.1732
21.7559	-160.17	-65.1866
21.7885	-159.996	-65.2017
21.8211	-159.823	-65.2182
21.8538	-159.651	-65.2358
21.8864	-159.48	-65.2543
21.9191	-159.311	-65.2735
21.9517	-159.142	-65.2931
21.9843	-158.975	-65.3129
22.017	-158.808	-65.3326
22.0496	-158.643	-65.3519
22.0822	-158.478	-65.3707
22.1149	-158.315	-65.3888
22.1475	-158.152	-65.4058
22.1802	-157.991	-65.4217
22.2128	-157.83	-65.4361
22.2454	-157.67	-65.4491
22.2781	-157.512	-65.4603
22.3107	-157.354	-65.4697
22.3433	-157.196	-65.4772
22.376	-157.04	-65.4826
22.4086	-156.885	-65.4859
22.4413	-156.73	-65.487
22.4739	-156.576	-65.4859
22.5065	-156.423	-65.4825
22.5392	-156.27	-65.4769
22.5718	-156.119	-65.469
22.6044	-155.968	-65.4589
22.6371	-155.817	-65.4467
22.6697	-155.667	-65.4323
22.7023	-155.518	-65.4159
22.735	-155.369	-65.3975
22.7676	-155.22	-65.3773
22.8003	-155.072	-65.3554
22.8329	-154.924	-65.332
22.8655	-154.776	-65.3071
22.8982	-154.629	-65.2809
22.9308	-154.481	-65.2535
22.9634	-154.334	-65.2253
22.9961	-154.186	-65.1961
23.0287	-154.038	-65.1663
23.0614	-153.89	-65.136
23.094	-153.742	-65.1054
23.1266	-153.593	-65.0745
23.1593	-153.443	-65.0435
23.1919	-153.293	-65.0125
23.2245	-153.142	-64.9818
23.2572	-152.991	-64.9513
23.2898	-152.839	-64.9213
23.3225	-152.686	-64.8918
23.3551	-152.532	-64.8629
23.3877	-152.377	-64.8348
23.4204	-152.222	-64.8075
23.453	-152.066	-64.7811
23.4856	-151.909	-64.7556
23.5183	-151.751	-64.7312
23.5509	-151.593	-64.7078
23.5836	-151.434	-64.6855
23.6162	-151.274	-64.6643
23.6488	-151.115	-64.6442
23.6815	-150.954	-64.6253
23.7141	-150.794	-64.6073
23.7467	-150.633	-64.5905
23.7794	-150.472	-64.5746
23.812	-150.31	-64.5596
23.8446	-150.149	-64.5455
23.8773	-149.988	-64.5321
23.9099	-149.828	-64.5195
23.9426	-149.667	-64.5073
23.9752	-149.508	-64.4957
24.0078	-149.348	-64.4843
24.0405	-149.19	-64.4732
24.0731	-149.032	-64.4622
24.1057	-148.875	-64.4511
24.1384	-148.719	-64.4397
24.171	-148.564	-64.4281
24.2037	-148.411	-64.416
24.2363	-148.258	-64.4032
24.2689	-148.107	-64.3897
24.3016	-147.958	-64.3753
24.3342	-147.81	-64.36
24.3668	-147.664	-64.3436
24.3995	-147.52	-64.326
24.4321	-147.378	-64.3071
24.4648	-147.237	-64.2869
24.4974	-147.099	-64.2652
24.53	-146.963	-64.2421
24.5627	-146.829	-64.2175
24.5953	-146.696	-64.1913
24.6279	-146.567	-64.1635
24.6606	-146.439	-64.1341
24.6932	-146.313	-64.103
24.7258	-146.19	-64.0702
24.7585	-146.069	-64.0358
24.7911	-145.951	-63.9997
24.8238	-145.835	-63.962
24.8564	-145.721	-63.9227
24.889	-145.609	-63.8817
24.9217	-145.5	-63.8392
24.9543	-145.393	-63.7951
24.9869	-145.288	-63.7495
25.0196	-145.185	-63.7025
25.0522	-145.085	-63.6539
25.0849	-144.986	-63.604
25.1175	-144.889	-63.5527
25.1501	-144.794	-63.5
25.1828	-144.701	-63.446
25.2154	-144.609	-63.3908
25.248	-144.519	-63.3344
25.2807	-144.43	-63.2769
25.3133	-144.342	-63.2183
25.346	-144.255	-63.1587
25.3786	-144.17	-63.0982
25.4112	-144.085	-63.0369
25.4439	-144	-62.9748
25.4765	-143.917	-62.9119
25.5091	-143.834	-62.8485
25.5418	-143.751	-62.7845
25.5744	-143.668	-62.72
25.607	-143.586	-62.6551
25.6397	-143.504	-62.5899
25.6723	-143.421	-62.5244
25.705	-143.339	-62.4588
25.7376	-143.256	-62.3931
25.7702	-143.173	-62.3273
25.8029	-143.09	-62.2616
25.8355	-143.006	-62.196
25.8681	-142.922	-62.1305
25.9008	-142.838	-62.0652
25.9334	-142.752	-62.0002
25.9661	-142.666	-61.9356
25.9987	-142.58	-61.8712
26.0313	-142.492	-61.8073
26.064	-142.404	-61.7438
26.0966	-142.315	-61.6809
26.1292	-142.225	-61.6184
26.1619	-142.133	-61.5565
26.1945	-142.041	-61.4953
26.2272	-141.948	-61.4347
26.2598	-141.853	-61.3748
26.2924	-141.757	-61.3157
26.3251	-141.66	-61.2574
26.3577	-141.562	-61.2
26.3903	-141.462	-61.1436
26.423	-141.361	-61.0882
26.4556	-141.258	-61.0339
26.4883	-141.153	-60.9809
26.5209	-141.047	-60.929
26.5535	-140.94	-60.8785
26.5862	-140.83	-60.8294
26.6188	-140.719	-60.7817
26.6514	-140.605	-60.7354
26.6841	-140.49	-60.6908
26.7167	-140.373	-60.6476
26.7493	-140.254	-60.6061
26.782	-140.133	-60.5662
26.8146	-140.009	-60.5279
26.8473	-139.884	-60.4912
26.8799	-139.756	-60.4561
26.9125	-139.627	-60.4225
26.9452	-139.495	-60.3904
26.9778	-139.361	-60.3596
27.0104	-139.225	-60.3302
27.0431	-139.087	-60.302
27.0757	-138.947	-60.2749
27.1084	-138.804	-60.2488
27.141	-138.66	-60.2237
27.1736	-138.514	-60.1994
27.2063	-138.366	-60.1757
27.2389	-138.216	-60.1527
27.2715	-138.064	-60.1301
27.3042	-137.91	-60.1078
27.3368	-137.755	-60.0857
27.3695	-137.598	-60.0636
27.4021	-137.44	-60.0415
27.4347	-137.28	-60.0191
27.4674	-137.118	-59.9964
27.5	-136.955	-59.9731
27.5326	-136.791	-59.9491
27.5653	-136.626	-59.9244
27.5979	-136.46	-59.8986
27.6305	-136.293	-59.8717
27.6632	-136.125	-59.8436
27.6958	-135.956	-59.814
27.7285	-135.787	-59.7828
27.7611	-135.618	-59.7499
27.7937	-135.448	-59.7152
27.8264	-135.278	-59.6785
27.859	-135.109	-59.6398
27.8916	-134.94	-59.5989
27.9243	-134.771	-59.5558
27.9569	-134.603	-59.5104
27.9896	-134.435	-59.4628
28.0222	-134.269	-59.4127
28.0548	-134.104	-59.3604
28.0875	-133.94	-59.3056
28.1201	-133.778	-59.2486
28.1527	-133.617	-59.1893
28.1854	-133.459	-59.1278
28.218	-133.302	-59.0641
28.2507	-133.148	-58.9984
28.2833	-132.996	-58.9308
28.3159	-132.847	-58.8614
28.3486	-132.7	-58.7903
28.3812	-132.557	-58.7177
28.4138	-132.417	-58.6438
28.4465	-132.279	-58.5687
28.4791	-132.146	-58.4925
28.5117	-132.015	-58.4156
28.5444	-131.889	-58.338
28.577	-131.766	-58.26
28.6097	-131.647	-58.1817
28.6423	-131.532	-58.1034
28.6749	-131.421	-58.0253
28.7076	-131.314	-57.9475
28.7402	-131.211	-57.8703
28.7728	-131.113	-57.7938
28.8055	-131.018	-57.7183
28.8381	-130.929	-57.6439
28.8708	-130.843	-57.5708
28.9034	-130.762	-57.4991
28.936	-130.686	-57.4291
28.9687	-130.614	-57.3607
29.0013	-130.547	-57.2942
29.0339	-130.484	-57.2297
29.0666	-130.425	-57.1672
29.0992	-130.371	-57.1069
29.1319	-130.322	-57.0488
29.1645	-130.277	-56.993
29.1971	-130.237	-56.9395
29.2298	-130.2	-56.8885
29.2624	-130.169	-56.8398
29.295	-130.141	-56.7936
29.3277	-130.118	-56.7498
29.3603	-130.099	-56.7084
29.393	-130.084	-56.6694
29.4256	-130.073	-56.6327
29.4582	-130.067	-56.5983
29.4909	-130.064	-56.5661
29.5235	-130.065	-56.5361
29.5561	-130.069	-56.5081
29.5888	-130.077	-56.4822
29.6214	-130.089	-56.4581
29.654	-130.104	-56.4358
29.6867	-130.122	-56.4153
29.7193	-130.143	-56.3963
29.752	-130.167	-56.3789
29.7846	-130.193	-56.3629
29.8172	-130.223	-56.3483
29.8499	-130.254	-56.3349
29.8825	-130.289	-56.3228
29.9151	-130.325	-56.3117
29.9478	-130.363	-56.3018
29.9804	-130.403	-56.2929
30.0131	-130.445	-56.285
30.0457	-130.488	-56.278
30.0783	-130.533	-56.272
30.111	-130.579	-56.2668
30.1436	-130.626	-56.2626
30.1762	-130.674	-56.2593
30.2089	-130.722	-56.2569
30.2415	-130.771	-56.2554
30.2742	-130.821	-56.2549
30.3068	-130.87	-56.2554
30.3394	-130.92	-56.2569
30.3721	-130.97	-56.2595
30.4047	-131.019	-56.2632
30.4373	-131.067	-56.2681
30.47	-131.115	-56.2744
30.5026	-131.163	-56.2819
30.5352	-131.209	-56.2909
30.5679	-131.254	-56.3014
30.6005	-131.297	-56.3135
30.6332	-131.339	-56.3273
30.6658	-131.379	-56.3428
30.6984	-131.418	-56.3603
30.7311	-131.454	-56.3797
30.7637	-131.488	-56.4011
30.7963	-131.52	-56.4247
30.829	-131.549	-56.4506
30.8616	-131.576	-56.4788
30.8943	-131.6	-56.5095
30.9269	-131.621	-56.5427
30.9595	-131.639	-56.5785
30.9922	-131.654	-56.617
31.0248	-131.665	-56.6583
31.0574	-131.673	-56.7024
31.0901	-131.677	-56.7493
31.1227	-131.677	-56.7991
31.1554	-131.674	-56.8519
31.188	-131.666	-56.9075
31.2206	-131.654	-56.966
31.2533	-131.638	-57.0275
31.2859	-131.617	-57.0917
31.3185	-131.592	-57.1587
31.3512	-131.562	-57.2284
31.3838	-131.527	-57.3007
31.4164	-131.488	-57.3753
31.4491	-131.444	-57.4523
31.4817	-131.396	-57.5314
31.5144	-131.343	-57.6125
31.547	-131.286	-57.6954
31.5796	-131.225	-57.7798
31.6123	-131.159	-57.8656
31.6449	-131.089	-57.9526
31.6775	-131.016	-58.0406
31.7102	-130.938	-58.1293
31.7428	-130.857	-58.2185
31.7755	-130.772	-58.308
31.8081	-130.684	-58.3976
31.8407	-130.593	-58.487
31.8734	-130.5	-58.576
31.906	-130.403	-58.6643
31.9386	-130.304	-58.7519
31.9713	-130.203	-58.8384
32.0039	-130.1	-58.9236
32.0366	-129.996	-59.0074
32.0692	-129.89	-59.0895
32.1018	-129.782	-59.1697
32.1345	-129.674	-59.2478
32.1671	-129.565	-59.3235
32.1997	-129.455	-59.3968
32.2324	-129.345	-59.4674
32.265	-129.235	-59.535
32.2977	-129.126	-59.5995
32.3303	-129.016	-59.6607
32.3629	-128.907	-59.7185
32.3956	-128.799	-59.7727
32.4282	-128.691	-59.8231
32.4608	-128.585	-59.8696
32.4935	-128.48	-59.912
32.5261	-128.376	-59.9503
32.5587	-128.273	-59.9844
32.5914	-128.173	-60.0142
32.624	-128.074	-60.0397
32.6567	-127.978	-60.0607
32.6893	-127.883	-60.0774
32.7219	-127.791	-60.0897
32.7546	-127.702	-60.0976
32.7872	-127.615	-60.1013
32.8198	-127.531	-60.1006
32.8525	-127.449	-60.0959
32.8851	-127.371	-60.087
32.9178	-127.295	-60.0742
32.9504	-127.223	-60.0575
32.983	-127.153	-60.0371
33.0157	-127.087	-60.0131
33.0483	-127.023	-59.9856
33.0809	-126.962	-59.9547
33.1136	-126.904	-59.9207
33.1462	-126.848	-59.8836
33.1789	-126.796	-59.8436
33.2115	-126.745	-59.8009
33.2441	-126.697	-59.7555
33.2768	-126.65	-59.7076
33.3094	-126.606	-59.6573
33.342	-126.563	-59.6048
33.3747	-126.522	-59.5502
33.4073	-126.482	-59.4936
33.4399	-126.443	-59.4352
33.4726	-126.405	-59.3751
33.5052	-126.367	-59.3133
33.5379	-126.331	-59.2501
33.5705	-126.294	-59.1856
33.6031	-126.258	-59.1198
33.6358	-126.222	-59.0529
33.6684	-126.186	-58.9851
33.701	-126.149	-58.9164
33.7337	-126.113	-58.847
33.7663	-126.076	-58.777
33.799	-126.039	-58.7066
33.8316	-126.001	-58.6358
33.8642	-125.963	-58.5649
33.8969	-125.925	-58.4938
33.9295	-125.885	-58.4228
33.9621	-125.846	-58.352
33.9948	-125.805	-58.2814
34.0274	-125.764	-58.2112
34.0601	-125.722	-58.1414
34.0927	-125.68	-58.0722
34.1253	-125.637	-58.0037
34.158	-125.593	-57.9358
34.1906	-125.548	-57.8687
34.2232	-125.503	-57.8025
34.2559	-125.457	-57.737
34.2885	-125.41	-57.6725
34.3211	-125.362	-57.6089
34.3538	-125.314	-57.5462
34.3864	-125.265	-57.4844
34.4191	-125.216	-57.4236
34.4517	-125.166	-57.3638
34.4843	-125.115	-57.3049
34.517	-125.065	-57.247
34.5496	-125.013	-57.1901
34.5822	-124.962	-57.134
34.6149	-124.91	-57.079
34.6475	-124.859	-57.0249
34.6802	-124.808	-56.9717
34.7128	-124.757	-56.9195
34.7454	-124.707	-56.8682
34.7781	-124.657	-56.8179
34.8107	-124.608	-56.7687
34.8433	-124.561	-56.7204
34.876	-124.515	-56.6732
34.9086	-124.47	-56.6271
34.9413	-124.427	-56.5821
34.9739	-124.386	-56.5382
35.0065	-124.346	-56.4953
35.0392	-124.309	-56.4536
35.0718	-124.274	-56.413
35.1044	-124.241	-56.3735
35.1371	-124.211	-56.3351
35.1697	-124.184	-56.2978
35.2023	-124.159	-56.2616
35.235	-124.136	-56.2265
35.2676	-124.117	-56.1925
35.3003	-124.1	-56.1596
35.3329	-124.085	-56.1278
35.3655	-124.074	-56.097
35.3982	-124.065	-56.0673
35.4308	-124.058	-56.0387
35.4634	-124.054	-56.0111
35.4961	-124.052	-55.9846
35.5287	-124.053	-55.9591
35.5614	-124.055	-55.9347
35.594	-124.059	-55.9113
35.6266	-124.065	-55.8891
35.6593	-124.073	-55.8679
35.6919	-124.082	-55.8479
35.7245	-124.092	-55.8291
35.7572	-124.103	-55.8114
35.7898	-124.116	-55.795
35.8225	-124.129	-55.7799
35.8551	-124.142	-55.7661
35.8877	-124.156	-55.7536
35.9204	-124.17	-55.7426
35.953	-124.185	-55.733
35.9856	-124.199	-55.7249
36.0183	-124.213	-55.7183
36.0509	-124.227	-55.7132
36.0836	-124.24	-55.7097
36.1162	-124.253	-55.7078
36.1488	-124.266	-55.7075
36.1815	-124.277	-55.7088
36.2141	-124.288	-55.7118
36.2467	-124.298	-55.7164
36.2794	-124.308	-55.7228
36.312	-124.316	-55.7308
36.3446	-124.324	-55.7405
36.3773	-124.33	-55.7519
36.4099	-124.336	-55.7651
36.4426	-124.341	-55.7799
36.4752	-124.345	-55.7966
36.5078	-124.349	-55.8149
36.5405	-124.351	-55.835
36.5731	-124.353	-55.8568
36.6057	-124.354	-55.8804
36.6384	-124.355	-55.9057
36.671	-124.355	-55.9326
36.7037	-124.355	-55.9613
36.7363	-124.354	-55.9916
36.7689	-124.354	-56.0235
36.8016	-124.353	-56.0571
36.8342	-124.353	-56.0923
36.8668	-124.353	-56.129
36.8995	-124.353	-56.1672
36.9321	-124.354	-56.2068
36.9648	-124.356	-56.2479
36.9974	-124.358	-56.2903
37.03	-124.361	-56.3339
37.0627	-124.366	-56.3787
37.0953	-124.371	-56.4246
37.1279	-124.378	-56.4715
37.1606	-124.386	-56.5193
37.1932	-124.396	-56.568
37.2258	-124.407	-56.6174
37.2585	-124.42	-56.6675
37.2911	-124.435	-56.7183
37.3238	-124.451	-56.7695
37.3564	-124.469	-56.8211
37.389	-124.49	-56.8731
37.4217	-124.512	-56.9253
37.4543	-124.536	-56.9777
37.4869	-124.562	-57.0302
37.5196	-124.59	-57.0826
37.5522	-124.62	-57.1349
37.5849	-124.652	-57.187
37.6175	-124.685	-57.2388
37.6501	-124.72	-57.2902
37.6828	-124.755	-57.3412
37.7154	-124.793	-57.3916
37.748	-124.83	-57.4414
37.7807	-124.869	-57.4904
37.8133	-124.908	-57.5387
37.846	-124.947	-57.5861
37.8786	-124.986	-57.6326
37.9112	-125.025	-57.678
37.9439	-125.062	-57.7224
37.9765	-125.099	-57.7656
38.0091	-125.134	-57.8077
38.0418	-125.168	-57.8485
38.0744	-125.199	-57.8882
38.107	-125.229	-57.9266
38.1397	-125.256	-57.9637
38.1723	-125.28	-57.9996
38.205	-125.302	-58.0343
38.2376	-125.321	-58.0678
38.2702	-125.337	-58.1001
38.3029	-125.35	-58.1314
38.3355	-125.36	-58.1617
38.3681	-125.366	-58.191
38.4008	-125.37	-58.2195
38.4334	-125.369	-58.2471
38.4661	-125.366	-58.2741
38.4987	-125.359	-58.3005
38.5313	-125.349	-58.3264
38.564	-125.336	-58.3519
38.5966	-125.319	-58.377
38.6292	-125.3	-58.402
38.6619	-125.277	-58.4268
38.6945	-125.252	-58.4516
38.7272	-125.224	-58.4766
38.7598	-125.194	-58.5017
38.7924	-125.161	-58.5271
38.8251	-125.126	-58.5529
38.8577	-125.089	-58.5792
38.8903	-125.05	-58.606
38.923	-125.009	-58.6336
38.9556	-124.967	-58.6618
38.9883	-124.924	-58.6908
39.0209	-124.879	-58.7208
39.0535	-124.833	-58.7516
39.0862	-124.787	-58.7834
39.1188	-124.74	-58.8163
39.1514	-124.693	-58.8502
39.1841	-124.645	-58.8852
39.2167	-124.597	-58.9213
39.2493	-124.55	-58.9586
39.282	-124.502	-58.997
39.3146	-124.455	-59.0365
39.3473	-124.408	-59.0772
39.3799	-124.362	-59.119
39.4125	-124.317	-59.1618
39.4452	-124.273	-59.2057
39.4778	-124.23	-59.2505
39.5104	-124.189	-59.2962
39.5431	-124.149	-59.3427
39.5757	-124.11	-59.39
39.6084	-124.073	-59.4379
39.641	-124.039	-59.4863
39.6736	-124.006	-59.5351
39.7063	-123.976	-59.5842
39.7389	-123.948	-59.6334
39.7715	-123.923	-59.6827
39.8042	-123.9	-59.7319
39.8368	-123.88	-59.7808
39.8695	-123.862	-59.8294
39.9021	-123.847	-59.8774
39.9347	-123.835	-59.9248
39.9674	-123.826	-59.9714
40	-123.82	-60.0172
40.0326	-123.816	-60.062
40.0653	-123.815	-60.1058
40.0979	-123.818	-60.1483
40.1305	-123.823	-60.1897
40.1632	-123.831	-60.2298
40.1958	-123.841	-60.2685
40.2285	-123.855	-60.3058
40.2611	-123.872	-60.3417
40.2937	-123.891	-60.3762
40.3264	-123.913	-60.4092
40.359	-123.938	-60.4408
40.3916	-123.966	-60.471
40.4243	-123.997	-60.4997
40.4569	-124.03	-60.5272
40.4896	-124.066	-60.5533
40.5222	-124.105	-60.5782
40.5548	-124.147	-60.602
40.5875	-124.192	-60.6247
40.6201	-124.24	-60.6465
40.6527	-124.291	-60.6674
40.6854	-124.345	-60.6877
40.718	-124.402	-60.7073
40.7507	-124.462	-60.7265
40.7833	-124.525	-60.7454
40.8159	-124.591	-60.7642
40.8486	-124.661	-60.7829
40.8812	-124.733	-60.8019
40.9138	-124.81	-60.8212
40.9465	-124.889	-60.841
40.9791	-124.972	-60.8616
41.0117	-125.059	-60.883
41.0444	-125.149	-60.9054
41.077	-125.243	-60.9291
41.1097	-125.34	-60.9541
41.1423	-125.44	-60.9807
41.1749	-125.544	-61.0091
41.2076	-125.652	-61.0393
41.2402	-125.763	-61.0716
41.2728	-125.877	-61.1061
41.3055	-125.993	-61.1429
41.3381	-126.113	-61.1821
41.3708	-126.236	-61.2239
41.4034	-126.36	-61.2684
41.436	-126.487	-61.3156
41.4687	-126.617	-61.3656
41.5013	-126.748	-61.4185
41.5339	-126.88	-61.4744
41.5666	-127.014	-61.5333
41.5992	-127.149	-61.5952
41.6319	-127.285	-61.6602
41.6645	-127.422	-61.7283
41.6971	-127.559	-61.7995
41.7298	-127.697	-61.8737
41.7624	-127.834	-61.951
41.795	-127.972	-62.0313
41.8277	-128.109	-62.1147
41.8603	-128.245	-62.201
41.893	-128.381	-62.2902
41.9256	-128.516	-62.3823
41.9582	-128.65	-62.4773
41.9909	-128.783	-62.575
42.0235	-128.915	-62.6755
42.0561	-129.045	-62.7786
42.0888	-129.174	-62.8842
42.1214	-129.302	-62.9923
42.154	-129.428	-63.1028
42.1867	-129.553	-63.2156
42.2193	-129.675	-63.3306
42.252	-129.797	-63.4477
42.2846	-129.916	-63.5668
42.3172	-130.033	-63.6879
42.3499	-130.149	-63.8108
42.3825	-130.263	-63.9355
42.4151	-130.374	-64.0619
42.4478	-130.484	-64.1899
42.4804	-130.592	-64.3194
42.5131	-130.697	-64.4505
42.5457	-130.801	-64.5831
42.5783	-130.902	-64.717
42.611	-131.002	-64.8524
42.6436	-131.1	-64.9891
42.6762	-131.196	-65.1271
42.7089	-131.29	-65.2664
42.7415	-131.382	-65.4071
42.7742	-131.473	-65.5491
42.8068	-131.562	-65.6925
42.8394	-131.65	-65.8372
42.8721	-131.736	-65.9833
42.9047	-131.822	-66.1309
42.9373	-131.907	-66.2799
42.97	-131.992	-66.4305
43.0026	-132.076	-66.5828
43.0352	-132.16	-66.7367
43.0679	-132.245	-66.8924
43.1005	-132.329	-67.0499
43.1332	-132.414	-67.2093
43.1658	-132.5	-67.3707
43.1984	-132.587	-67.5342
43.2311	-132.674	-67.6998
43.2637	-132.763	-67.8676
43.2963	-132.854	-68.0376
43.329	-132.946	-68.21
43.3616	-133.039	-68.3848
43.3943	-133.134	-68.5621
43.4269	-133.23	-68.7419
43.4595	-133.328	-68.9243
43.4922	-133.428	-69.1093
43.5248	-133.53	-69.297
43.5574	-133.633	-69.4875
43.5901	-133.738	-69.6808
43.6227	-133.844	-69.877
43.6554	-133.952	-70.0761
43.688	-134.061	-70.2781
43.7206	-134.171	-70.4831
43.7533	-134.282	-70.6912
43.7859	-134.394	-70.9022
43.8185	-134.507	-71.1163
43.8512	-134.62	-71.3335
43.8838	-134.734	-71.5537
43.9164	-134.849	-71.777
43.9491	-134.963	-72.0032
43.9817	-135.078	-72.2325
44.0144	-135.193	-72.4647
44.047	-135.308	-72.6998
44.0796	-135.423	-72.9378
44.1123	-135.538	-73.1785
44.1449	-135.653	-73.4219
44.1775	-135.769	-73.6678
44.2102	-135.884	-73.9163
44.2428	-136	-74.1671
44.2755	-136.115	-74.4202
44.3081	-136.232	-74.6754
44.3407	-136.348	-74.9327
44.3734	-136.466	-75.1919
44.406	-136.584	-75.4529
44.4386	-136.702	-75.7156
44.4713	-136.822	-75.9799
44.5039	-136.943	-76.2456
44.5366	-137.064	-76.5125
44.5692	-137.187	-76.7807
44.6018	-137.312	-77.0499
44.6345	-137.438	-77.3199
44.6671	-137.565	-77.5908
44.6997	-137.694	-77.8622
44.7324	-137.825	-78.1341
44.765	-137.957	-78.4064
44.7977	-138.092	-78.6789
44.8303	-138.228	-78.9514
44.8629	-138.367	-79.2239
44.8956	-138.508	-79.4961
44.9282	-138.652	-79.7681
44.9608	-138.798	-80.0395
44.9935	-138.947	-80.3104
45.0261	-139.098	-80.5806
45.0587	-139.253	-80.8499
45.0914	-139.411	-81.1183
45.124	-139.572	-81.3857
45.1567	-139.736	-81.6519
45.1893	-139.904	-81.9168
45.2219	-140.075	-82.1804
45.2546	-140.249	-82.4425
45.2872	-140.428	-82.7031
45.3198	-140.609	-82.9622
45.3525	-140.795	-83.2195
45.3851	-140.983	-83.4751
45.4178	-141.176	-83.729
45.4504	-141.371	-83.9809
45.483	-141.57	-84.231
45.5157	-141.773	-84.4791
45.5483	-141.978	-84.7253
45.5809	-142.185	-84.9694
45.6136	-142.396	-85.2115
45.6462	-142.608	-85.4516
45.6789	-142.822	-85.6896
45.7115	-143.038	-85.9256
45.7441	-143.254	-86.1595
45.7768	-143.471	-86.3914
45.8094	-143.689	-86.6212
45.842	-143.906	-86.849
45.8747	-144.122	-87.0747
45.9073	-144.336	-87.2984
45.9399	-144.549	-87.5202
45.9726	-144.759	-87.7399
46.0052	-144.966	-87.9576
46.0379	-145.169	-88.1734
46.0705	-145.368	-88.3872
46.1031	-145.563	-88.599
46.1358	-145.752	-88.8088
46.1684	-145.935	-89.0166
46.201	-146.113	-89.2224
46.2337	-146.283	-89.4261
46.2663	-146.446	-89.6278
46.299	-146.602	-89.8273
46.3316	-146.75	-90.0247
46.3642	-146.889	-90.2199
46.3969	-147.019	-90.4128
46.4295	-147.139	-90.6035
46.4621	-147.25	-90.7918
46.4948	-147.351	-90.9776
46.5274	-147.441	-91.161
46.5601	-147.52	-91.3417
46.5927	-147.588	-91.5196
46.6253	-147.644	-91.6948
46.658	-147.688	-91.8669
46.6906	-147.72	-92.036
46.7232	-147.739	-92.2019
46.7559	-147.744	-92.3644
46.7885	-147.736	-92.5234
46.8211	-147.715	-92.6787
46.8538	-147.679	-92.8302
46.8864	-147.629	-92.9777
46.9191	-147.564	-93.121
46.9517	-147.484	-93.2599
46.9843	-147.389	-93.3943
47.017	-147.278	-93.524
47.0496	-147.152	-93.6488
47.0822	-147.009	-93.7685
47.1149	-146.85	-93.8829
47.1475	-146.675	-93.9919
47.1802	-146.482	-94.0952
47.2128	-146.273	-94.1927
47.2454	-146.046	-94.2843
47.2781	-145.802	-94.3697
47.3107	-145.539	-94.4489
47.3433	-145.26	-94.5215
47.376	-144.961	-94.5875
47.4086	-144.645	-94.6468
47.4413	-144.31	-94.6991
47.4739	-143.957	-94.7443
47.5065	-143.584	-94.7823
47.5392	-143.193	-94.8129
47.5718	-142.782	-94.8361
47.6044	-142.352	-94.8516
47.6371	-141.903	-94.8594
47.6697	-141.434	-94.8594
47.7023	-140.944	-94.8514
47.735	-140.435	-94.8354
47.7676	-139.905	-94.8113
47.8003	-139.355	-94.779
47.8329	-138.784	-94.7385
47.8655	-138.192	-94.6897
47.8982	-137.579	-94.6325
47.9308	-136.945	-94.567
47.9634	-136.289	-94.4929
47.9961	-135.612	-94.4104
48.0287	-134.913	-94.3194
48.0614	-134.192	-94.2198
48.094	-133.449	-94.1117
48.1266	-132.684	-93.995
48.1593	-131.897	-93.8698
48.1919	-131.088	-93.736
48.2245	-130.256	-93.5936
48.2572	-129.402	-93.4428
48.2898	-128.525	-93.2834
48.3225	-127.627	-93.1155
48.3551	-126.705	-92.9391
48.3877	-125.762	-92.7544
48.4204	-124.796	-92.5613
48.453	-123.808	-92.3599
48.4856	-122.798	-92.1502
48.5183	-121.766	-91.9323
48.5509	-120.713	-91.7062
48.5836	-119.638	-91.4721
48.6162	-118.541	-91.2299
48.6488	-117.424	-90.9796
48.6815	-116.286	-90.7215
48.7141	-115.128	-90.4554
48.7467	-113.95	-90.1815
48.7794	-112.753	-89.8998
48.812	-111.537	-89.6104
48.8446	-110.302	-89.3133
48.8773	-109.05	-89.0087
48.9099	-107.78	-88.6965
48.9426	-106.493	-88.377
48.9752	-105.19	-88.0501
49.0078	-103.871	-87.716
49.0405	-102.538	-87.3747
49.0731	-101.19	-87.0264
49.1057	-99.8282	-86.6713
49.1384	-98.4536	-86.3094
49.171	-97.0665	-85.9408
49.2037	-95.6677	-85.5658
49.2363	-94.2578	-85.1844
49.2689	-92.8373	-84.7969
49.3016	-91.407	-84.4033
49.3342	-89.9675	-84.0038
49.3668	-88.5194	-83.5986
49.3995	-87.0633	-83.1879
49.4321	-85.5999	-82.7718
49.4648	-84.1298	-82.3504
49.4974	-82.6536	-81.9241
49.53	-81.1719	-81.4928
49.5627	-79.6854	-81.0569
49.5953	-78.1947	-80.6166
49.6279	-76.7004	-80.1719
49.6606	-75.203	-79.7232
49.6932	-73.7033	-79.2706
49.7258	-72.2018	-78.8144
49.7585	-70.699	-78.3548
49.7911	-69.1956	-77.892
49.8238	-67.6921	-77.4262
49.8564	-66.189	-76.9577
49.889	-64.6868	-76.4867
49.9217	-63.186	-76.0134
49.9543	-61.6871	-75.5382
49.9869	-60.1906	-75.0612
50.0196	-58.6968	-74.5826
50.0522	-57.2062	-74.1028
50.0849	-55.7192	-73.622
50.1175	-54.2361	-73.1405
50.1501	-52.7574	-72.6584
50.1828	-51.2833	-72.176
50.2154	-49.8143	-71.6936
50.248	-48.3505	-71.2114
50.2807	-46.8923	-70.7297
50.3133	-45.44	-70.2488
50.346	-43.9938	-69.7687
50.3786	-42.5541	-69.2898
50.4112	-41.1209	-68.8123
50.4439	-39.6946	-68.3364
50.4765	-38.2754	-67.8623
50.5091	-36.8636	-67.3903
50.5418	-35.4593	-66.9205
50.5744	-34.0629	-66.4531
50.607	-32.6745	-65.9882
50.6397	-31.2945	-65.5262
50.6723	-29.923	-65.0671
50.705	-28.5604	-64.611
50.7376	-27.2068	-64.1582
50.7702	-25.8626	-63.7087
50.8029	-24.528	-63.2627
50.8355	-23.2033	-62.8203
50.8681	-21.8888	-62.3817
50.9008	-20.5847	-61.9469
50.9334	-19.2913	-61.516
50.9661	-18.0088	-61.0891
50.9987	-16.7376	-60.6663
51.0313	-15.4778	-60.2477
51.064	-14.2299	-59.8334
51.0966	-12.994	-59.4234
51.1292	-11.7704	-59.0178
51.1619	-10.5593	-58.6168
51.1945	-9.36092	-58.2204
51.2272	-8.1755	-57.8285
51.2598	-7.00316	-57.4414
51.2924	-5.84415	-57.059
51.3251	-4.69861	-56.6815
51.3577	-3.5667	-56.3087
51.3903	-2.44859	-55.9409
51.423	-1.34435	-55.578
51.4556	-0.254189	-55.22
51.4883	0.821844	-54.867
51.5209	1.88358	-54.519
51.5535	2.93098	-54.1759
51.5862	3.9639	-53.8379
51.6188	4.98228	-53.5049
51.6514	5.98604	-53.177
51.6841	6.97512	-52.854
51.7167	7.94949	-52.5361
51.7493	8.90908	-52.2233
51.782	9.8539	-51.9155
51.8146	10.7839	-51.6128
51.8473	11.6991	-51.3151
51.8799	12.5995	-51.0224
51.9125	13.4852	-50.7348
51.9452	14.3562	-50.4523
51.9778	15.2126	-50.1747
52.0104	16.0545	-49.9022
52.0431	16.882	-49.6348
52.0757	17.6951	-49.3723
52.1084	18.4941	-49.1149
52.141	19.2791	-48.8624
52.1736	20.0502	-48.615
52.2063	20.8075	-48.3725
52.2389	21.5513	-48.135
52.2715	22.2818	-47.9024
52.3042	22.9992	-47.6748
52.3368	23.7036	-47.4521
52.3695	24.3954	-47.2343
52.4021	25.0748	-47.0213
52.4347	25.7419	-46.8132
52.4674	26.3973	-46.6099
52.5	27.0409	-46.4113
52.5326	27.6732	-46.2173
52.5653	28.2945	-46.0281
52.5979	28.9049	-45.8434
52.6305	29.5047	-45.6632
52.6632	30.0943	-45.4874
52.6958	30.6738	-45.3161
52.7285	31.2437	-45.1491
52.7611	31.8041	-44.9863
52.7937	32.3553	-44.8276
52.8264	32.8977	-44.6731
52.859	33.4314	-44.5225
52.8916	33.9569	-44.3759
52.9243	34.4745	-44.233
52.9569	34.9843	-44.0939
52.9896	35.4867	-43.9584
53.0222	35.982	-43.8264
53.0548	36.4704	-43.6979
53.0875	36.9523	-43.5727
53.1201	37.4279	-43.4507
53.1527	37.8976	-43.3319
53.1854	38.3615	-43.2162
53.218	38.8199	-43.1034
53.2507	39.2732	-42.9935
53.2833	39.7215	-42.8863
53.3159	40.165	-42.7819
53.3486	40.6041	-42.68
53.3812	41.0388	-42.5807
53.4138	41.4694	-42.4837
53.4465	41.896	-42.3891
53.4791	42.3188	-42.2967
53.5117	42.7379	-42.2064
53.5444	43.1535	-42.1182
53.577	43.5656	-42.032
53.6097	43.9745	-41.9477
53.6423	44.3801	-41.8652
53.6749	44.7827	-41.7845
53.7076	45.1824	-41.7055
53.7402	45.5792	-41.6282
53.7728	45.9733	-41.5524
53.8055	46.3646	-41.4783
53.8381	46.7534	-41.4056
53.8708	47.1397	-41.3345
53.9034	47.5236	-41.2649
53.936	47.905	-41.1967
53.9687	48.2842	-41.1299
54.0013	48.6611	-41.0645
54.0339	49.0358	-41.0005
54.0666	49.4083	-40.938
54.0992	49.7786	-40.8768
54.1319	50.1468	-40.8171
54.1645	50.5128	-40.7587
54.1971	50.8767	-40.7018
54.2298	51.2385	-40.6464
54.2624	51.598	-40.5923
54.295	51.9552	-40.5398
54.3277	52.3102	-40.4888
54.3603	52.6628	-40.4393
54.393	53.013	-40.3914
54.4256	53.3607	-40.3451
54.4582	53.706	-40.3005
54.4909	54.0486	-40.2575
54.5235	54.3887	-40.2163
54.5561	54.7262	-40.1768
54.5888	55.0609	-40.139
54.6214	55.3929	-40.1031
54.654	55.7222	-40.0691
54.6867	56.0486	-40.0369
54.7193	56.3724	-40.0067
54.752	56.6933	-39.9784
54.7846	57.0116	-39.952
54.8172	57.3271	-39.9276
54.8499	57.6399	-39.9053
54.8825	57.9501	-39.8849
54.9151	58.2578	-39.8665
54.9478	58.5629	-39.8501
54.9804	58.8656	-39.8357
55.0131	59.1659	-39.8233
55.0457	59.4639	-39.8129
55.0783	59.7598	-39.8043
55.111	60.0537	-39.7977
55.1436	60.3456	-39.7929
55.1762	60.6357	-39.79
55.2089	60.9241	-39.7888
55.2415	61.2111	-39.7893
55.2742	61.4966	-39.7916
55.3068	61.7809	-39.7954
55.3394	62.0641	-39.8007
55.3721	62.3463	-39.8076
55.4047	62.6278	-39.8158
55.4373	62.9085	-39.8253
55.47	63.1887	-39.8362
55.5026	63.4684	-39.8481
55.5352	63.7478	-39.8612
55.5679	64.0269	-39.8752
55.6005	64.3059	-39.8902
55.6332	64.5847	-39.9059
55.6658	64.8635	-39.9224
55.6984	65.1424	-39.9395
55.7311	65.4213	-39.9571
55.7637	65.7002	-39.9752
55.7963	65.9793	-39.9937
55.829	66.2583	-40.0124
55.8616	66.5373	-40.0313
55.8943	66.8163	-40.0503
55.9269	67.095	-40.0694
55.9595	67.3735	-40.0885
55.9922	67.6517	-40.1074
56.0248	67.9293	-40.1263
56.0574	68.2063	-40.145
56.0901	68.4825	-40.1634
56.1227	68.7578	-40.1816
56.1554	69.0319	-40.1995
56.188	69.3046	-40.2171
56.2206	69.5757	-40.2344
56.2533	69.845	-40.2512
56.2859	70.1122	-40.2677
56.3185	70.3769	-40.2839
56.3512	70.6389	-40.2996
56.3838	70.8979	-40.315
56.4164	71.1536	-40.3301
56.4491	71.4055	-40.3448
56.4817	71.6534	-40.3592
56.5144	71.8968	-40.3733
56.547	72.1355	-40.3871
56.5796	72.3691	-40.4006
56.6123	72.5972	-40.414
56.6449	72.8195	-40.4272
56.6775	73.0356	-40.4402
56.7102	73.2454	-40.4532
56.7428	73.4483	-40.466
56.7755	73.6443	-40.4789
56.8081	73.8329	-40.4918
56.8407	74.0139	-40.5047
56.8734	74.1872	-40.5178
56.906	74.3524	-40.5309
56.9386	74.5093	-40.5442
56.9713	74.6577	-40.5577
57.0039	74.7975	-40.5713
57.0366	74.9285	-40.5852
57.0692	75.0506	-40.5993
57.1018	75.1636	-40.6137
57.1345	75.2674	-40.6283
57.1671	75.3621	-40.6431
57.1997	75.4475	-40.6583
57.2324	75.5236	-40.6737
57.265	75.5905	-40.6894
57.2977	75.6482	-40.7053
57.3303	75.6968	-40.7216
57.3629	75.7363	-40.7381
57.3956	75.7669	-40.7548
57.4282	75.7887	-40.7719
57.4608	75.8018	-40.7892
57.4935	75.8064	-40.8067
57.5261	75.8027	-40.8244
57.5587	75.791	-40.8423
57.5914	75.7713	-40.8604
57.624	75.744	-40.8786
57.6567	75.7093	-40.8969
57.6893	75.6673	-40.9152
57.7219	75.6183	-40.9336
57.7546	75.5626	-40.9519
57.7872	75.5003	-40.9702
57.8198	75.4317	-40.9883
57.8525	75.3569	-41.0062
57.8851	75.2761	-41.024
57.9178	75.1896	-41.0414
57.9504	75.0975	-41.0586
57.983	74.9999	-41.0755
58.0157	74.897	-41.0919
58.0483	74.7889	-41.108
58.0809	74.6758	-41.1236
58.1136	74.5579	-41.1388
58.1462	74.4351	-41.1535
58.1789	74.3075	-41.1677
58.2115	74.1753	-41.1814
58.2441	74.0385	-41.1945
58.2768	73.8971	-41.2071
58.3094	73.7511	-41.2191
58.342	73.6004	-41.2306
58.3747	73.4452	-41.2415
58.4073	73.2853	-41.2519
58.4399	73.1206	-41.2616
58.4726	72.9512	-41.2708
58.5052	72.7769	-41.2794
58.5379	72.5976	-41.2875
58.5705	72.4133	-41.295
58.6031	72.2238	-41.3019
58.6358	72.0289	-41.3082
58.6684	71.8286	-41.3141
58.701	71.6227	-41.3194
58.7337	71.411	-41.3242
58.7663	71.1934	-41.3285
58.799	70.9697	-41.3324
58.8316	70.7398	-41.3358
58.8642	70.5035	-41.3388
58.8969	70.2606	-41.3415
58.9295	70.0109	-41.3438
58.9621	69.7543	-41.3459
58.9948	69.4905	-41.3476
59.0274	69.2194	-41.3492
59.0601	68.9409	-41.3506
59.0927	68.6547	-41.3518
59.1253	68.3607	-41.3529
59.158	68.0587	-41.354
59.1906	67.7487	-41.355
59.2232	67.4305	-41.3561
59.2559	67.1041	-41.3573
59.2885	66.7692	-41.3586
59.3211	66.4259	-41.36
59.3538	66.074	-41.3616
59.3864	65.7136	-41.3634
59.4191	65.3445	-41.3654
59.4517	64.9669	-41.3676
59.4843	64.5806	-41.3702
59.517	64.1857	-41.3729
59.5496	63.7823	-41.376
59.5822	63.3704	-41.3793
59.6149	62.9501	-41.3829
59.6475	62.5215	-41.3867
59.6802	62.0847	-41.3908
59.7128	61.6397	-41.395
59.7454	61.1868	-41.3995
59.7781	60.726	-41.4041
59.8107	60.2576	-41.4088
59.8433	59.7816	-41.4136
59.876	59.2982	-41.4184
59.9086	58.8077	-41.4232
59.9413	58.3101	-41.428
59.9739	57.8057	-41.4327
60.0065	57.2947	-41.4372
60.0392	56.7773	-41.4415
60.0718	56.2537	-41.4456
60.1044	55.724	-41.4495
60.1371	55.1884	-41.453
60.1697	54.6471	-41.4562
60.2023	54.1003	-41.459
60.235	53.5481	-41.4614
60.2676	52.9906	-41.4634
60.3003	52.4279	-41.4649
60.3329	51.8602	-41.466
60.3655	51.2876	-41.4665
60.3982	50.7101	-41.4666
60.4308	50.1279	-41.4662
60.4634	49.541	-41.4652
60.4961	48.9494	-41.4637
60.5287	48.3531	-41.4617
60.5614	47.7523	-41.4592
60.594	47.1469	-41.4562
60.6266	46.537	-41.4527
60.6593	45.9224	-41.4487
60.6919	45.3033	-41.4443
60.7245	44.6794	-41.4394
60.7572	44.0509	-41.4341
60.7898	43.4177	-41.4285
60.8225	42.7797	-41.4225
60.8551	42.1368	-41.4161
60.8877	41.489	-41.4095
60.9204	40.8361	-41.4027
60.953	40.1782	-41.3956
60.9856	39.5152	-41.3883
61.0183	38.8468	-41.381
61.0509	38.1732	-41.3735
61.0836	37.4941	-41.366
61.1162	36.8096	-41.3584
61.1488	36.1195	-41.3509
61.1815	35.4238	-41.3434
61.2141	34.7224	-41.336
61.2467	34.0152	-41.3286
61.2794	33.3023	-41.3214
61.312	32.5836	-41.3144
61.3446	31.8591	-41.3075
61.3773	31.1287	-41.3008
61.4099	30.3926	-41.2942
61.4426	29.6507	-41.2879
61.4752	28.9031	-41.2818
61.5078	28.1498	-41.2759
61.5405	27.3909	-41.2702
61.5731	26.6265	-41.2648
61.6057	25.8567	-41.2596
61.6384	25.0816	-41.2547
61.671	24.3014	-41.2501
61.7037	23.5161	-41.2457
61.7363	22.726	-41.2415
61.7689	21.9313	-41.2376
61.8016	21.132	-41.234
61.8342	20.3283	-41.2306
61.8668	19.5206	-41.2275
61.8995	18.709	-41.2246
61.9321	17.8937	-41.2219
61.9648	17.0749	-41.2195
61.9974	16.2531	-41.2173
62.03	15.4283	-41.2152
62.0627	14.601	-41.2134
62.0953	13.7713	-41.2117
62.1279	12.9396	-41.2101
62.1606	12.1062	-41.2086
62.1932	11.2714	-41.2072
62.2258	10.4354	-41.2059
62.2585	9.59852	-41.2047
62.2911	8.76105	-41.2035
62.3238	7.92325	-41.2022
62.3564	7.08537	-41.201
62.389	6.24766	-41.1997
62.4217	5.41036	-41.1984
62.4543	4.57367	-41.197
62.4869	3.73781	-41.1955
62.5196	2.90296	-41.1939
62.5522	2.0693	-41.1923
62.5849	1.23699	-41.1905
62.6175	0.406188	-41.1887
62.6501	-0.422963	-41.1868
62.6828	-1.25034	-41.1848
62.7154	-2.0758	-41.1828
62.748	-2.89924	-41.1807
62.7807	-3.72054	-41.1785
62.8133	-4.5396	-41.1763
62.846	-5.35634	-41.174
62.8786	-6.17066	-41.1717
62.9112	-6.98249	-41.1694
62.9439	-7.79176	-41.167
62.9765	-8.59843	-41.1646
63.0091	-9.40244	-41.1621
63.0418	-10.2038	-41.1595
63.0744	-11.0024	-41.1569
63.107	-11.7983	-41.1542
63.1397	-12.5915	-41.1514
63.1723	-13.3819	-41.1485
63.205	-14.1696	-41.1454
63.2376	-14.9545	-41.1423
63.2702	-15.7366	-41.1389
63.3029	-16.516	-41.1354
63.3355	-17.2926	-41.1317
63.3681	-18.0665	-41.1278
63.4008	-18.8377	-41.1236
63.4334	-19.6062	-41.1192
63.4661	-20.3719	-41.1146
63.4987	-21.135	-41.1098
63.5313	-21.8953	-41.1047
63.564	-22.653	-41.0994
63.5966	-23.4079	-41.0939
63.6292	-24.1602	-41.0882
63.6619	-24.9098	-41.0823
63.6945	-25.6567	-41.0762
63.7272	-26.401	-41.0699
63.7598	-27.1426	-41.0635
63.7924	-27.8817	-41.057
63.8251	-28.6182	-41.0503
63.8577	-29.3521	-41.0435
63.8903	-30.0834	-41.0366
63.923	-30.8122	-41.0295
63.9556	-31.5385	-41.0224
63.9883	-32.2622	-41.0152
64.0209	-32.9834	-41.008
64.0535	-33.7021	-41.0007
64.0862	-34.4181	-40.9933
64.1188	-35.1316	-40.9859
64.1514	-35.8424	-40.9784
64.1841	-36.5505	-40.9709
64.2167	-37.2559	-40.9633
64.2493	-37.9586	-40.9556
64.282	-38.6584	-40.9479
64.3146	-39.3553	-40.9401
64.3473	-40.0493	-40.9322
64.3799	-40.7402	-40.9241
64.4125	-41.4281	-40.916
64.4452	-42.1127	-40.9078
64.4778	-42.7942	-40.8994
64.5104	-43.4723	-40.8909
64.5431	-44.1469	-40.8823
64.5757	-44.8182	-40.8735
64.6084	-45.4858	-40.8646
64.641	-46.1499	-40.8555
64.6736	-46.8103	-40.8463
64.7063	-47.4668	-40.8369
64.7389	-48.1196	-40.8274
64.7715	-48.7684	-40.8178
64.8042	-49.4131	-40.808
64.8368	-50.0538	-40.798
64.8695	-50.6904	-40.7879
64.9021	-51.3227	-40.7777
64.9347	-51.9507	-40.7673
64.9674	-52.5745	-40.7568
65	-53.1938	-40.7461
65.0326	-53.8087	-40.7352
65.0653	-54.4192	-40.7242
65.0979	-55.0252	-40.713
65.1305	-55.6267	-40.7016
65.1632	-56.2235	-40.69
65.1958	-56.8158	-40.6782
65.2285	-57.4034	-40.6662
65.2611	-57.9863	-40.6539
65.2937	-58.5644	-40.6414
65.3264	-59.1379	-40.6286
65.359	-59.7065	-40.6155
65.3916	-60.2703	-40.6021
65.4243	-60.8293	-40.5885
65.4569	-61.3835	-40.5745
65.4896	-61.9329	-40.5602
65.5222	-62.4773	-40.5456
65.5548	-63.017	-40.5306
65.5875	-63.5517	-40.5154
65.6201	-64.0815	-40.4999
65.6527	-64.6063	-40.484
65.6854	-65.1262	-40.4678
65.718	-65.6412	-40.4514
65.7507	-66.1512	-40.4346
65.7833	-66.6561	-40.4175
65.8159	-67.1561	-40.4001
65.8486	-67.6511	-40.3824
65.8812	-68.141	-40.3644
65.9138	-68.6259	-40.3461
65.9465	-69.1058	-40.3275
65.9791	-69.5806	-40.3086
66.0117	-70.0504	-40.2895
66.0444	-70.5151	-40.27
66.077	-70.9747	-40.2503
66.1097	-71.4292	-40.2304
66.1423	-71.8788	-40.2102
66.1749	-72.3232	-40.1898
66.2076	-72.7626	-40.1692
66.2402	-73.197	-40.1484
66.2728	-73.6263	-40.1274
66.3055	-74.0506	-40.1063
66.3381	-74.4698	-40.085
66.3708	-74.884	-40.0636
66.4034	-75.2931	-40.0421
66.436	-75.697	-40.0205
66.4687	-76.0959	-39.9988
66.5013	-76.4897	-39.9771
66.5339	-76.8783	-39.9554
66.5666	-77.2617	-39.9336
66.5992	-77.64	-39.9119
66.6319	-78.0131	-39.8903
66.6645	-78.3809	-39.8687
66.6971	-78.7435	-39.8472
66.7298	-79.1008	-39.8258
66.7624	-79.4529	-39.8045
66.795	-79.7996	-39.7834
66.8277	-80.141	-39.7624
66.8603	-80.4772	-39.7416
66.893	-80.808	-39.721
66.9256	-81.1335	-39.7006
66.9582	-81.4539	-39.6804
66.9909	-81.7689	-39.6604
67.0235	-82.0789	-39.6407
67.0561	-82.3837	-39.6213
67.0888	-82.6835	-39.6021
67.1214	-82.9782	-39.5832
67.154	-83.268	-39.5646
67.1867	-83.553	-39.5463
67.2193	-83.8332	-39.5282
67.252	-84.1086	-39.5105
67.2846	-84.3794	-39.493
67.3172	-84.6457	-39.4757
67.3499	-84.9075	-39.4587
67.3825	-85.1651	-39.4419
67.4151	-85.4184	-39.4253
67.4478	-85.6676	-39.4089
67.4804	-85.9128	-39.3927
67.5131	-86.1541	-39.3766
67.5457	-86.3917	-39.3606
67.5783	-86.6257	-39.3446
67.611	-86.8562	-39.3287
67.6436	-87.0834	-39.3128
67.6762	-87.3073	-39.2969
67.7089	-87.5282	-39.281
67.7415	-87.7461	-39.265
67.7742	-87.9613	-39.2489
67.8068	-88.1738	-39.2327
67.8394	-88.3839	-39.2163
67.8721	-88.5916	-39.1999
67.9047	-88.7972	-39.1832
67.9373	-89.0007	-39.1665
67.97	-89.2024	-39.1496
68.0026	-89.4023	-39.1326
68.0352	-89.6006	-39.1154
68.0679	-89.7975	-39.0981
68.1005	-89.993	-39.0807
68.1332	-90.1873	-39.0633
68.1658	-90.3806	-39.0457
68.1984	-90.5728	-39.0281
68.2311	-90.7643	-39.0105
68.2637	-90.955	-38.9929
68.2963	-91.1451	-38.9752
68.329	-91.3347	-38.9576
68.3616	-91.5239	-38.94
68.3943	-91.7127	-38.9225
68.4269	-91.9013	-38.905
68.4595	-92.0898	-38.8877
68.4922	-92.2781	-38.8704
68.5248	-92.4664	-38.8532
68.5574	-92.6546	-38.8362
68.5901	-92.8429	-38.8192
68.6227	-93.0312	-38.8024
68.6554	-93.2196	-38.7858
68.688	-93.4081	-38.7693
68.7206	-93.5967	-38.7529
68.7533	-93.7853	-38.7366
68.7859	-93.974	-38.7205
68.8185	-94.1626	-38.7044
68.8512	-94.3512	-38.6885
68.8838	-94.5397	-38.6727
68.9164	-94.728	-38.657
68.9491	-94.916	-38.6413
68.9817	-95.1037	-38.6258
69.0144	-95.2909	-38.6102
69.047	-95.4776	-38.5948
69.0796	-95.6637	-38.5793
69.1123	-95.8489	-38.5639
69.1449	-96.0333	-38.5485
69.1775	-96.2167	-38.5331
69.2102	-96.399	-38.5176
69.2428	-96.58	-38.5022
69.2755	-96.7596	-38.4867
69.3081	-96.9378	-38.4711
69.3407	-97.1143	-38.4555
69.3734	-97.2891	-38.4398
69.406	-97.4621	-38.4239
69.4386	-97.6331	-38.408
69.4713	-97.8021	-38.3918
69.5039	-97.9689	-38.3756
69.5366	-98.1334	-38.3591
69.5692	-98.2957	-38.3424
69.6018	-98.4554	-38.3254
69.6345	-98.6127	-38.3083
69.6671	-98.7675	-38.2908
69.6997	-98.9195	-38.2731
69.7324	-99.069	-38.2551
69.765	-99.2157	-38.2368
69.7977	-99.3597	-38.2182
69.8303	-99.5009	-38.1993
69.8629	-99.6394	-38.1801
69.8956	-99.7752	-38.1606
69.9282	-99.9082	-38.1408
69.9608	-100.038	-38.1206
69.9935	-100.166	-38.1002
70.0261	-100.291	-38.0795
70.0587	-100.413	-38.0585
70.0914	-100.532	-38.0373
70.124	-100.649	-38.0158
70.1567	-100.764	-37.9941
70.1893	-100.875	-37.9722
70.2219	-100.985	-37.9501
70.2546	-101.092	-37.9279
70.2872	-101.197	-37.9056
70.3198	-101.299	-37.8833
70.3525	-101.399	-37.8608
70.3851	-101.498	-37.8383
70.4178	-101.594	-37.8159
70.4504	-101.688	-37.7934
70.483	-101.78	-37.771
70.5157	-101.871	-37.7486
70.5483	-101.96	-37.7264
70.5809	-102.047	-37.7041
70.6136	-102.132	-37.682
70.6462	-102.216	-37.6599
70.6789	-102.299	-37.638
70.7115	-102.38	-37.6161
70.7441	-102.46	-37.5943
70.7768	-102.539	-37.5727
70.8094	-102.616	-37.5511
70.842	-102.692	-37.5297
70.8747	-102.767	-37.5083
70.9073	-102.841	-37.4872
70.9399	-102.914	-37.4661
70.9726	-102.987	-37.4452
71.0052	-103.058	-37.4244
71.0379	-103.127	-37.4037
71.0705	-103.196	-37.3832
71.1031	-103.264	-37.3629
71.1358	-103.331	-37.3427
71.1684	-103.397	-37.3227
71.201	-103.462	-37.3029
71.2337	-103.525	-37.2833
71.2663	-103.587	-37.2638
71.299	-103.648	-37.2446
71.3316	-103.707	-37.2257
71.3642	-103.765	-37.2069
71.3969	-103.822	-37.1884
71.4295	-103.877	-37.1701
71.4621	-103.931	-37.152
71.4948	-103.982	-37.1342
71.5274	-104.032	-37.1166
71.5601	-104.081	-37.0992
71.5927	-104.127	-37.0821
71.6253	-104.172	-37.0651
71.658	-104.214	-37.0484
71.6906	-104.255	-37.0319
71.7232	-104.294	-37.0155
71.7559	-104.331	-36.9993
71.7885	-104.366	-36.9833
71.8211	-104.399	-36.9675
71.8538	-104.429	-36.9518
71.8864	-104.458	-36.9362
71.9191	-104.485	-36.9208
71.9517	-104.51	-36.9055
71.9843	-104.533	-36.8904
72.017	-104.555	-36.8753
72.0496	-104.574	-36.8603
72.0822	-104.592	-36.8454
72.1149	-104.608	-36.8305
72.1475	-104.622	-36.8157
72.1802	-104.636	-36.801
72.2128	-104.647	-36.7863
72.2454	-104.658	-36.7717
72.2781	-104.667	-36.7571
72.3107	-104.676	-36.7425
72.3433	-104.684	-36.728
72.376	-104.691	-36.7135
72.4086	-104.697	-36.6991
72.4413	-104.703	-36.6847
72.4739	-104.709	-36.6703
72.5065	-104.715	-36.656
72.5392	-104.72	-36.6418
72.5718	-104.726	-36.6276
72.6044	-104.733	-36.6135
72.6371	-104.739	-36.5994
72.6697	-104.746	-36.5854
72.7023	-104.754	-36.5714
72.735	-104.763	-36.5574
72.7676	-104.772	-36.5435
72.8003	-104.783	-36.5297
72.8329	-104.795	-36.5158
72.8655	-104.807	-36.502
72.8982	-104.821	-36.4882
72.9308	-104.837	-36.4744
72.9634	-104.854	-36.4606
72.9961	-104.872	-36.4467
73.0287	-104.892	-36.4328
73.0614	-104.914	-36.4187
73.094	-104.937	-36.4045
73.1266	-104.962	-36.3901
73.1593	-104.989	-36.3755
73.1919	-105.017	-36.3606
73.2245	-105.047	-36.3454
73.2572	-105.079	-36.3298
73.2898	-105.113	-36.3138
73.3225	-105.148	-36.2974
73.3551	-105.185	-36.2804
73.3877	-105.223	-36.2628
73.4204	-105.263	-36.2446
73.453	-105.305	-36.2256
73.4856	-105.348	-36.2058
73.5183	-105.392	-36.1852
73.5509	-105.438	-36.1636
73.5836	-105.485	-36.141
73.6162	-105.532	-36.1173
73.6488	-105.581	-36.0925
73.6815	-105.631	-36.0664
73.7141	-105.681	-36.039
73.7467	-105.731	-36.0103
73.7794	-105.783	-35.9802
73.812	-105.834	-35.9487
73.8446	-105.886	-35.9157
73.8773	-105.938	-35.8812
73.9099	-105.99	-35.8452
73.9426	-106.042	-35.8076
73.9752	-106.094	-35.7685
74.0078	-106.145	-35.7278
74.0405	-106.196	-35.6856
74.0731	-106.246	-35.6419
74.1057	-106.296	-35.5966
74.1384	-106.345	-35.5499
74.171	-106.394	-35.5016
74.2037	-106.442	-35.452
74.2363	-106.489	-35.401
74.2689	-106.535	-35.3486
74.3016	-106.58	-35.2951
74.3342	-106.625	-35.2403
74.3668	-106.669	-35.1845
74.3995	-106.712	-35.1277
74.4321	-106.754	-35.07
74.4648	-106.795	-35.0115
74.4974	-106.835	-34.9524
74.53	-106.875	-34.8927
74.5627	-106.913	-34.8325
74.5953	-106.951	-34.7721
74.6279	-106.988	-34.7115
74.6606	-107.024	-34.6508
74.6932	-107.059	-34.5903
74.7258	-107.093	-34.53
74.7585	-107.126	-34.4701
74.7911	-107.158	-34.4108
74.8238	-107.189	-34.3521
74.8564	-107.219	-34.2942
74.889	-107.248	-34.2372
74.9217	-107.277	-34.1814
74.9543	-107.304	-34.1267
74.9869	-107.331	-34.0733
75.0196	-107.356	-34.0214
75.0522	-107.381	-33.971
75.0849	-107.404	-33.9223
75.1175	-107.427	-33.8753
75.1501	-107.449	-33.8301
75.1828	-107.47	-33.7868
75.2154	-107.49	-33.7454
75.248	-107.508	-33.706
75.2807	-107.526	-33.6686
75.3133	-107.543	-33.6333
75.346	-107.559	-33.6001
75.3786	-107.574	-33.569
75.4112	-107.588	-33.54
75.4439	-107.601	-33.5131
75.4765	-107.614	-33.4882
75.5091	-107.625	-33.4653
75.5418	-107.635	-33.4444
75.5744	-107.644	-33.4255
75.607	-107.653	-33.4084
75.6397	-107.66	-33.3932
75.6723	-107.667	-33.3796
75.705	-107.673	-33.3678
75.7376	-107.677	-33.3575
75.7702	-107.681	-33.3488
75.8029	-107.684	-33.3414
75.8355	-107.686	-33.3354
75.8681	-107.688	-33.3306
75.9008	-107.688	-33.3268
75.9334	-107.688	-33.3241
75.9661	-107.686	-33.3223
75.9987	-107.684	-33.3213
76.0313	-107.681	-33.321
76.064	-107.677	-33.3212
76.0966	-107.673	-33.322
76.1292	-107.667	-33.3231
76.1619	-107.661	-33.3246
76.1945	-107.654	-33.3263
76.2272	-107.647	-33.328
76.2598	-107.639	-33.3298
76.2924	-107.63	-33.3316
76.3251	-107.621	-33.3333
76.3577	-107.611	-33.3347
76.3903	-107.601	-33.336
76.423	-107.59	-33.337
76.4556	-107.579	-33.3377
76.4883	-107.568	-33.338
76.5209	-107.557	-33.338
76.5535	-107.545	-33.3376
76.5862	-107.533	-33.3368
76.6188	-107.521	-33.3356
76.6514	-107.509	-33.334
76.6841	-107.497	-33.332
76.7167	-107.484	-33.3296
76.7493	-107.472	-33.3268
76.782	-107.46	-33.3237
76.8146	-107.448	-33.3202
76.8473	-107.436	-33.3163
76.8799	-107.425	-33.3121
76.9125	-107.413	-33.3077
76.9452	-107.402	-33.3029
76.9778	-107.39	-33.2979
77.0104	-107.379	-33.2927
77.0431	-107.368	-33.2872
77.0757	-107.358	-33.2816
77.1084	-107.347	-33.2759
77.141	-107.337	-33.27
77.1736	-107.326	-33.2641
77.2063	-107.316	-33.2581
77.2389	-107.305	-33.252
77.2715	-107.295	-33.2459
77.3042	-107.285	-33.2398
77.3368	-107.274	-33.2336
77.3695	-107.263	-33.2275
77.4021	-107.252	-33.2213
77.4347	-107.241	-33.215
77.4674	-107.23	-33.2088
77.5	-107.218	-33.2024
77.5326	-107.206	-33.196
77.5653	-107.193	-33.1894
77.5979	-107.18	-33.1826
77.6305	-107.167	-33.1756
77.6632	-107.153	-33.1684
77.6958	-107.139	-33.1608
77.7285	-107.124	-33.1529
77.7611	-107.109	-33.1445
77.7937	-107.093	-33.1356
77.8264	-107.076	-33.126
77.859	-107.06	-33.1158
77.8916	-107.042	-33.1048
77.9243	-107.024	-33.0929
77.9569	-107.006	-33.08
77.9896	-106.987	-33.0661
78.0222	-106.968	-33.051
78.0548	-106.948	-33.0347
78.0875	-106.927	-33.017
78.1201	-106.906	-32.9978
78.1527	-106.885	-32.9772
78.1854	-106.863	-32.955
78.218	-106.841	-32.9311
78.2507	-106.818	-32.9055
78.2833	-106.795	-32.8781
78.3159	-106.771	-32.8489
78.3486	-106.747	-32.8177
78.3812	-106.723	-32.7847
78.4138	-106.698	-32.7497
78.4465	-106.672	-32.7128
78.4791	-106.647	-32.6739
78.5117	-106.621	-32.633
78.5444	-106.595	-32.5902
78.577	-106.568	-32.5455
78.6097	-106.541	-32.499
78.6423	-106.514	-32.4506
78.6749	-106.487	-32.4004
78.7076	-106.46	-32.3485
78.7402	-106.432	-32.2949
78.7728	-106.404	-32.2398
78.8055	-106.376	-32.1831
78.8381	-106.348	-32.1249
78.8708	-106.32	-32.0654
78.9034	-106.292	-32.0046
78.936	-106.263	-31.9426
78.9687	-106.235	-31.8794
79.0013	-106.206	-31.8153
79.0339	-106.177	-31.7501
79.0666	-106.148	-31.6842
79.0992	-106.119	-31.6175
79.1319	-106.09	-31.5502
79.1645	-106.06	-31.4824
79.1971	-106.03	-31.4141
79.2298	-106	-31.3455
79.2624	-105.97	-31.2766
79.295	-105.94	-31.2076
79.3277	-105.909	-31.1386
79.3603	-105.878	-31.0696
79.393	-105.846	-31.0007
79.4256	-105.814	-30.9321
79.4582	-105.782	-30.8637
79.4909	-105.749	-30.7957
79.5235	-105.716	-30.7281
79.5561	-105.682	-30.661
79.5888	-105.648	-30.5945
79.6214	-105.613	-30.5285
79.654	-105.577	-30.4632
79.6867	-105.541	-30.3986
79.7193	-105.504	-30.3346
79.752	-105.467	-30.2714
79.7846	-105.428	-30.2088
79.8172	-105.39	-30.1471
79.8499	-105.35	-30.086
79.8825	-105.31	-30.0257
79.9151	-105.27	-29.9661
79.9478	-105.228	-29.9072
79.9804	-105.187	-29.8489
80.0131	-105.144	-29.7913
80.0457	-105.101	-29.7343
80.0783	-105.058	-29.6779
80.111	-105.014	-29.622
80.1436	-104.969	-29.5666
80.1762	-104.925	-29.5117
[truncated: 301 more rows]

## Sheet: Fig1-S1A-350 nm
	Fluorescence counts at 350 nm
Temperature, °C	VPS34-CII WT	mCherry-VPS34-CII WT
15	8317.76	3820.55
15.0326	8298.73	3826.92
15.0653	8282.58	3828.1
15.0979	8273.95	3827.09
15.1305	8265.44	3827.65
15.1632	8259.01	3828.61
15.1958	8242.34	3823.63
15.2285	8241.29	3819.99
15.2611	8232.28	3824.69
15.2937	8227.87	3827.79
15.3264	8218.27	3824.77
15.359	8211.42	3825.38
15.3916	8208.88	3823.74
15.4243	8197.07	3825.12
15.4569	8180.19	3824.21
15.4896	8180.16	3823.88
15.5222	8173.22	3821.2
15.5548	8164.92	3818.9
15.5875	8162.28	3816
15.6201	8151.9	3808.03
15.6527	8143.86	3812.21
15.6854	8134.86	3810.96
15.718	8134.92	3807.58
15.7507	8122.08	3808.16
15.7833	8121.68	3812.06
15.8159	8125.62	3811.08
15.8486	8113.55	3804.88
15.8812	8112.91	3801.24
15.9138	8103.3	3804.75
15.9465	8104.74	3804.23
15.9791	8094.64	3801.24
16.0117	8095.66	3798.37
16.0444	8089.4	3795.63
16.077	8084.03	3798.15
16.1097	8080.76	3796.73
16.1423	8075.25	3793.64
16.1749	8072.62	3793.49
16.2076	8064.28	3792.7
16.2402	8051.63	3790.5
16.2728	8051.77	3790.71
16.3055	8042.68	3784.81
16.3381	8039.33	3784.42
16.3708	8042.77	3783.17
16.4034	8040.89	3781.38
16.436	8026.81	3777.55
16.4687	8022.22	3775.12
16.5013	8005.1	3777.7
16.5339	8010.35	3778.39
16.5666	8007.34	3772.97
16.5992	8004.76	3773.28
16.6319	7997.76	3772.26
16.6645	7994.59	3776.35
16.6971	7980.49	3773.27
16.7298	7981.49	3772.07
16.7624	7979.55	3773.85
16.795	7979.91	3774.13
16.8277	7976.52	3770.28
16.8603	7964.9	3770.3
16.893	7967.22	3768.99
16.9256	7962.7	3767.9
16.9582	7950.2	3763.9
16.9909	7949.86	3766.3
17.0235	7955.4	3762.07
17.0561	7952.6	3760.51
17.0888	7938.65	3758.53
17.1214	7937.11	3761.18
17.154	7930.61	3757.74
17.1867	7927.14	3756.49
17.2193	7925.07	3754.4
17.252	7922.49	3758.47
17.2846	7905.59	3748.77
17.3172	7906.48	3750.45
17.3499	7902.58	3749.82
17.3825	7906.31	3748.66
17.4151	7891.58	3749.34
17.4478	7893.69	3747.77
17.4804	7885.58	3741.23
17.5131	7883.64	3742.13
17.5457	7881.05	3739.12
17.5783	7874.59	3737.43
17.611	7861.93	3733.63
17.6436	7857.89	3728.95
17.6762	7854.25	3722.71
17.7089	7855.01	3724.41
17.7415	7849.67	3727.4
17.7742	7841.85	3721.61
17.8068	7842.3	3724.07
17.8394	7840.41	3719.45
17.8721	7837.5	3724.94
17.9047	7836.11	3718.91
17.9373	7828.99	3711.51
17.97	7817.38	3712.81
18.0026	7815.74	3714.11
18.0352	7809.01	3710.58
18.0679	7802.82	3706.2
18.1005	7801.16	3704.62
18.1332	7795.02	3707.24
18.1658	7787.96	3710.39
18.1984	7780.03	3708.73
18.2311	7772.67	3707.46
18.2637	7774.94	3704.52
18.2963	7770.34	3706.5
18.329	7767.44	3706.82
18.3616	7765.76	3703.39
18.3943	7762.73	3703.22
18.4269	7761.62	3699.14
18.4595	7757	3695.16
18.4922	7747.23	3697.03
18.5248	7748.94	3692.05
18.5574	7744.05	3693.18
18.5901	7738.64	3689.1
18.6227	7734.27	3692.78
18.6554	7734.63	3688.82
18.688	7728.16	3684.73
18.7206	7729.41	3689.37
18.7533	7713.91	3680.46
18.7859	7705.89	3672.12
18.8185	7703.43	3675.14
18.8512	7696.99	3672.04
18.8838	7687.76	3667.33
18.9164	7687.75	3664.52
18.9491	7688.73	3665.87
18.9817	7682.29	3667.07
19.0144	7677.79	3664.01
19.047	7673.88	3662.6
19.0796	7670.56	3672.88
19.1123	7660.35	3670.28
19.1449	7660.88	3665.19
19.1775	7657.99	3663.43
19.2102	7650.66	3658.33
19.2428	7653.12	3652.11
19.2755	7644.04	3652.99
19.3081	7637.35	3650.03
19.3407	7632.14	3646.72
19.3734	7640.17	3649.47
19.406	7628.38	3643.37
19.4386	7618.73	3643.83
19.4713	7611.28	3642.84
19.5039	7616.47	3637.51
19.5366	7607.5	3639.55
19.5692	7608	3640.8
19.6018	7602.08	3634.52
19.6345	7604.3	3629.02
19.6671	7596.22	3628.77
19.6997	7592.53	3623.61
19.7324	7585.09	3627.84
19.765	7578.94	3625.35
19.7977	7577.76	3623.85
19.8303	7579.43	3619.29
19.8629	7557.16	3621.07
19.8956	7560.73	3619.79
19.9282	7552.95	3616.91
19.9608	7555.38	3617.99
19.9935	7548.16	3619.76
20.0261	7543.76	3619.09
20.0587	7539.14	3613.94
20.0914	7536.19	3609.78
20.124	7535.14	3609.39
20.1567	7536.9	3606.7
20.1893	7525.18	3606.28
20.2219	7523.03	3607.44
20.2546	7510.08	3604.03
20.2872	7511.24	3602.14
20.3198	7506.92	3606.93
20.3525	7511.43	3603.5
20.3851	7503.18	3603.81
20.4178	7501.72	3605.37
20.4504	7491.48	3593.36
20.483	7488.58	3593.67
20.5157	7485.38	3596.47
20.5483	7483.48	3596.69
20.5809	7473.97	3594.27
20.6136	7477.81	3592.35
20.6462	7474.12	3588.77
20.6789	7471.19	3588.01
20.7115	7470.06	3587.2
20.7441	7466.33	3587.02
20.7768	7458.32	3583.85
20.8094	7456.22	3586.1
20.842	7446.93	3581.9
20.8747	7446.43	3580.8
20.9073	7436.06	3577.62
20.9399	7431.41	3575.65
20.9726	7435.48	3574.84
21.0052	7436.85	3568.29
21.0379	7420.1	3567.74
21.0705	7415.83	3565.79
21.1031	7422.69	3568.55
21.1358	7416.35	3566.53
21.1684	7410.86	3567.85
21.201	7407.14	3564.07
21.2337	7399.54	3563.78
21.2663	7396.15	3558.89
21.299	7384.21	3561.35
21.3316	7382.3	3556.52
21.3642	7375.26	3551.29
21.3969	7373.64	3551.32
21.4295	7373.08	3546.91
21.4621	7372.86	3543.61
21.4948	7374.45	3543.87
21.5274	7357.6	3537.92
21.5601	7363.39	3537.43
21.5927	7357.98	3538.52
21.6253	7352.59	3536.23
21.658	7352.25	3534.25
21.6906	7351.2	3531.92
21.7232	7341.78	3530.98
21.7559	7331.78	3529.86
21.7885	7331.48	3526.21
21.8211	7332.58	3526.22
21.8538	7327.68	3525.59
21.8864	7322.89	3531.6
21.9191	7320.01	3524.89
21.9517	7323.06	3521.69
21.9843	7308.37	3520.81
22.017	7313.9	3518.17
22.0496	7304.01	3519.07
22.0822	7306.73	3517.48
22.1149	7296.58	3516.32
22.1475	7296.43	3514.82
22.1802	7284.49	3512.41
22.2128	7286.51	3513.13
22.2454	7285.26	3510.65
22.2781	7279.38	3507.28
22.3107	7273.21	3503.52
22.3433	7275.19	3501.44
22.376	7269.54	3503.19
22.4086	7262.81	3501.89
22.4413	7260.29	3503.26
22.4739	7249.45	3500.24
22.5065	7247.53	3497.75
22.5392	7243.63	3499.42
22.5718	7236.73	3491.56
22.6044	7234.24	3492.26
22.6371	7232.15	3492.87
22.6697	7232.98	3490.89
22.7023	7231.68	3485.45
22.735	7225.13	3486.79
22.7676	7218.38	3485.78
22.8003	7215.34	3482.94
22.8329	7210.43	3474.46
22.8655	7209.63	3481.96
22.8982	7204.61	3479.15
22.9308	7198.61	3478.53
22.9634	7189.51	3477.35
22.9961	7185.27	3480.46
23.0287	7182.68	3476.2
23.0614	7184.1	3477.05
23.094	7181.47	3474.72
23.1266	7178.34	3475.24
23.1593	7175.75	3477.3
23.1919	7176.96	3470.62
23.2245	7165.03	3457.64
23.2572	7162.7	3457.71
23.2898	7165.22	3456.66
23.3225	7156.25	3460.1
23.3551	7144.52	3459.26
23.3877	7145.62	3455.12
23.4204	7141.97	3454.63
23.453	7137.96	3454.95
23.4856	7140.36	3452.01
23.5183	7134.95	3451.99
23.5509	7122.99	3446.77
23.5836	7124.63	3444.66
23.6162	7119.54	3441.18
23.6488	7115.65	3442.11
23.6815	7113.62	3443.13
23.7141	7106.71	3438.15
23.7467	7100.6	3434.22
23.7794	7098.78	3431.7
23.812	7094.58	3430.15
23.8446	7093.7	3432.16
23.8773	7094.67	3431.55
23.9099	7089.59	3429.38
23.9426	7082.86	3428.59
23.9752	7080.23	3424.05
24.0078	7078.67	3421.06
24.0405	7073.83	3422.68
24.0731	7076.59	3425.02
24.1057	7067.63	3423.98
24.1384	7065.08	3420.25
24.171	7060.49	3415.02
24.2037	7061.37	3413.97
24.2363	7046.4	3413.74
24.2689	7047.03	3412.32
24.3016	7043.4	3410.88
24.3342	7044.56	3409.49
24.3668	7039.96	3407.88
24.3995	7038.65	3402.78
24.4321	7039.11	3401.82
24.4648	7032.48	3402.06
24.4974	7022.87	3402.18
24.53	7022.98	3399.22
24.5627	7020.16	3398.95
24.5953	7020.84	3399.03
24.6279	7012.78	3398.09
24.6606	7011.96	3398.33
24.6932	7000.72	3391.73
24.7258	6996.69	3388.41
24.7585	6993.37	3389.37
24.7911	6989.81	3384.63
24.8238	6988.74	3393.48
24.8564	6992.48	3390.56
24.889	6979.58	3377.78
24.9217	6981.05	3380.25
24.9543	6972.03	3381.31
24.9869	6975.41	3378.82
25.0196	6971.18	3376.84
25.0522	6969.92	3376.73
25.0849	6962.01	3374.84
25.1175	6966.01	3370.03
25.1501	6957.81	3366.62
25.1828	6958.97	3368.15
25.2154	6948.2	3369.58
25.248	6950.48	3365.98
25.2807	6941.61	3362.84
25.3133	6940.55	3363.25
25.346	6930.32	3365.62
25.3786	6931.69	3362.81
25.4112	6919.4	3365.77
25.4439	6927.03	3362.11
25.4765	6923.23	3360.06
25.5091	6923.23	3357.97
25.5418	6914.16	3352.51
25.5744	6914.34	3353.16
25.607	6902.87	3351.56
25.6397	6906.78	3351.5
25.6723	6903.65	3351.2
25.705	6901.35	3341.48
25.7376	6893.22	3343.28
25.7702	6891.91	3340.24
25.8029	6881.78	3341.93
25.8355	6884.81	3341.97
25.8681	6880.71	3334.93
25.9008	6879.33	3335.44
25.9334	6866.66	3333.61
25.9661	6870.07	3332.98
25.9987	6866.7	3336.25
26.0313	6864.91	3334.63
26.064	6861.62	3332.35
26.0966	6857.08	3331.53
26.1292	6852.81	3329.97
26.1619	6848.68	3328.97
26.1945	6848	3327.93
26.2272	6841.74	3326.68
26.2598	6839.89	3325.21
26.2924	6836.38	3325.31
26.3251	6835.6	3327.13
26.3577	6834.24	3321.29
26.3903	6834.15	3324.34
26.423	6823.89	3315.44
26.4556	6821.08	3315.46
26.4883	6812.31	3315.39
26.5209	6814.2	3312.03
26.5535	6806.44	3311.76
26.5862	6807.24	3307.62
26.6188	6803.67	3307.77
26.6514	6802.92	3299.3
26.6841	6795.05	3300.68
26.7167	6792.63	3298.29
26.7493	6787.39	3295.49
26.782	6788.47	3293.06
26.8146	6786.41	3293.08
26.8473	6785.12	3290.61
26.8799	6771.06	3290.85
26.9125	6776.22	3290.47
26.9452	6763.37	3286.7
26.9778	6764.73	3285.69
27.0104	6765.7	3287.87
27.0431	6767.57	3289.56
27.0757	6749.25	3285.27
27.1084	6747.15	3286.02
27.141	6743.41	3283.74
27.1736	6739.48	3287.3
27.2063	6745.06	3278.4
27.2389	6740.54	3276.78
27.2715	6733.02	3279.75
27.3042	6728.8	3276.34
27.3368	6724.6	3273.98
27.3695	6723.51	3273.69
27.4021	6720.86	3271.93
27.4347	6719.48	3270.42
27.4674	6715.07	3272.48
27.5	6715.32	3270.11
27.5326	6711.2	3266.75
27.5653	6703.38	3267.65
27.5979	6699.58	3265
27.6305	6697.28	3264.37
27.6632	6698	3261.23
27.6958	6698.57	3256.37
27.7285	6685.59	3251.93
27.7611	6684.37	3251.44
27.7937	6677.81	3248.19
27.8264	6682.5	3248.01
27.859	6681.39	3246.94
27.8916	6675.94	3253.08
27.9243	6666.94	3253.22
27.9569	6660.78	3251.56
27.9896	6660.61	3247.02
28.0222	6654.4	3246.61
28.0548	6651.49	3251.07
28.0875	6652.84	3241.1
28.1201	6650.09	3245
28.1527	6649.14	3240.97
28.1854	6645.81	3242.31
28.218	6645.17	3241.85
28.2507	6626.26	3240.76
28.2833	6629.75	3240.19
28.3159	6627.5	3232.35
28.3486	6627.81	3232.11
28.3812	6623.45	3238.23
28.4138	6615.93	3232.63
28.4465	6613.97	3231
28.4791	6610.32	3228.9
28.5117	6613.39	3226.2
28.5444	6606.92	3227.29
28.577	6601.78	3221.7
28.6097	6599.74	3219.51
28.6423	6589.33	3220.42
28.6749	6591.62	3216.72
28.7076	6592.31	3213.82
28.7402	6584.05	3217.3
28.7728	6576.99	3220.74
28.8055	6581.05	3209.9
28.8381	6581.42	3205.63
28.8708	6577.5	3213.15
28.9034	6573.77	3212.92
28.936	6566.7	3208.78
28.9687	6564.43	3207.74
29.0013	6556.77	3201.6
29.0339	6560.43	3200.65
29.0666	6552.94	3201.79
29.0992	6550.89	3197.01
29.1319	6551.41	3197.11
29.1645	6546.36	3195.32
29.1971	6547.52	3193.78
29.2298	6546.44	3191.42
29.2624	6544.19	3189.81
29.295	6541.59	3191.25
29.3277	6536.37	3188.04
29.3603	6533.14	3187.99
29.393	6530.59	3187.07
29.4256	6526.3	3182.55
29.4582	6525.27	3178.28
29.4909	6523.17	3180.78
29.5235	6511.84	3175.86
29.5561	6518.72	3173.32
29.5888	6511.95	3171.2
29.6214	6507.81	3173.12
29.654	6498.66	3170.26
29.6867	6498.87	3168.17
29.7193	6500.11	3167.91
29.752	6502.5	3170.19
29.7846	6486.33	3162.51
29.8172	6487.33	3164.53
29.8499	6486.51	3164.84
29.8825	6485.49	3160.99
29.9151	6482.41	3161.28
29.9478	6478.23	3161.83
29.9804	6477.2	3155.53
30.0131	6466.6	3152.37
30.0457	6461.68	3156.16
30.0783	6462.68	3157.84
30.111	6462.13	3155.61
30.1436	6455.05	3153.44
30.1762	6449.87	3154.56
30.2089	6452.5	3153.12
30.2415	6456.36	3157.72
30.2742	6444.73	3152.79
30.3068	6438.54	3152.53
30.3394	6442.37	3150.62
30.3721	6437.24	3156.82
30.4047	6436.1	3144.77
30.4373	6430.8	3142.8
30.47	6423.23	3146.66
30.5026	6417.37	3143.25
30.5352	6422.21	3139.97
30.5679	6414.5	3143.85
30.6005	6407.56	3142.6
30.6332	6407.29	3142.81
30.6658	6404.96	3143.14
30.6984	6403.83	3141.34
30.7311	6399.89	3137.67
30.7637	6397.62	3137.92
30.7963	6397.42	3132.86
30.829	6394.74	3128.36
30.8616	6386.93	3131.41
30.8943	6388.69	3128.13
30.9269	6377.38	3128.45
30.9595	6382.1	3127.56
30.9922	6371.57	3126.8
31.0248	6371.63	3126.92
31.0574	6366.38	3128.78
31.0901	6366.38	3127.55
31.1227	6357.96	3122.33
31.1554	6353.59	3122.64
31.188	6347.46	3116.89
31.2206	6342.76	3117.35
31.2533	6341.02	3113.17
31.2859	6342.24	3109.63
31.3185	6345.54	3112.36
31.3512	6342.23	3109.04
31.3838	6327.46	3104.3
31.4164	6327.97	3109.12
31.4491	6322.03	3106.52
31.4817	6318.09	3106.88
31.5144	6322.77	3102.34
31.547	6315.86	3096.89
31.5796	6310.42	3095.36
31.6123	6310.53	3098.98
31.6449	6301.69	3087.45
31.6775	6300.72	3091.27
31.7102	6298.44	3091.19
31.7428	6295.47	3091.72
31.7755	6290.93	3093.08
31.8081	6291.88	3089.66
31.8407	6288.02	3088.08
31.8734	6284.92	3084.11
31.906	6286.07	3083.32
31.9386	6283.55	3084.61
31.9713	6274.78	3085.81
32.0039	6277.76	3082.49
32.0366	6272.38	3081.35
32.0692	6273.28	3080.25
32.1018	6260.56	3076.12
32.1345	6261.09	3077.18
32.1671	6259.63	3074.13
32.1997	6256.73	3074.41
32.2324	6254.23	3071.56
32.265	6248.91	3065.57
32.2977	6243.04	3071.01
32.3303	6241.53	3070.02
32.3629	6243.97	3067.89
32.3956	6234.27	3065.52
32.4282	6232.83	3064.93
32.4608	6233.81	3059.5
32.4935	6230.73	3056.73
32.5261	6228.01	3056.61
32.5587	6222.72	3054.97
32.5914	6219.47	3050.91
32.624	6215.18	3052.12
32.6567	6215.54	3050.72
32.6893	6209.83	3051.6
32.7219	6206.26	3050.93
32.7546	6204.99	3047.59
32.7872	6198.72	3047.02
32.8198	6192.39	3047.44
32.8525	6195.24	3046.72
32.8851	6192.77	3044.42
32.9178	6193.82	3040.71
32.9504	6190.07	3035.65
32.983	6185.69	3037.83
33.0157	6188.3	3036.81
33.0483	6177.57	3036.75
33.0809	6177.66	3034.83
33.1136	6171.99	3034.7
33.1462	6171.63	3030.45
33.1789	6165.73	3028.8
33.2115	6166.51	3028.49
33.2441	6162.96	3027.35
33.2768	6160.1	3024.3
33.3094	6156.92	3024.83
33.342	6148.62	3025.75
33.3747	6142.42	3021.11
33.4073	6136.34	3017.89
33.4399	6139.62	3019.4
33.4726	6135.75	3017.69
33.5052	6142.34	3014.92
33.5379	6139.44	3013.97
33.5705	6131.71	3011.17
33.6031	6124.32	3008.35
33.6358	6128.23	3004.38
33.6684	6123.3	3004.24
33.701	6116.66	3002.92
33.7337	6113.11	3002.64
33.7663	6109.33	3002.94
33.799	6107.42	3005.42
33.8316	6105.83	3000.55
33.8642	6101.64	2997.83
33.8969	6102.73	2998.51
33.9295	6097.78	2996
33.9621	6097.09	2998.71
33.9948	6091.87	2997.42
34.0274	6089.98	2991.86
34.0601	6090.2	2993.63
34.0927	6092.82	2993.09
34.1253	6084.36	2993.9
34.158	6081.82	2988.57
34.1906	6081.06	2985.77
34.2232	6082.14	2988.07
34.2559	6081.78	2982.84
34.2885	6072.32	2978.62
34.3211	6062.02	2979.41
34.3538	6067.51	2973.42
34.3864	6066.46	2977.61
34.4191	6065.32	2971.7
34.4517	6062.82	2976.17
34.4843	6054.48	2976.06
34.517	6056.62	2974.17
34.5496	6050.31	2963.1
34.5822	6045.76	2968.11
34.6149	6045.19	2967.31
34.6475	6043.42	2968.18
34.6802	6019.8	2964.81
34.7128	6022.06	2966.44
34.7454	6019.39	2968.23
34.7781	6022.72	2965.26
34.8107	6015.65	2963.16
34.8433	6015.66	2962.47
34.876	6003.19	2960.15
34.9086	6007.88	2960.17
34.9413	6004.78	2956.31
34.9739	6002.87	2954.05
35.0065	6002.44	2951.82
35.0392	5995.67	2950.4
35.0718	5987.75	2949.79
35.1044	5985.85	2948.28
35.1371	5992.34	2943.9
35.1697	5989.27	2942.93
35.2023	5984.44	2942.07
35.235	5983.23	2946.48
35.2676	5984.6	2942.93
35.3003	5967.09	2940.04
35.3329	5960.36	2940.03
35.3655	5965.71	2936.43
35.3982	5965.07	2936.63
35.4308	5966.18	2937.43
35.4634	5958.63	2939.16
35.4961	5950	2931.05
35.5287	5945.08	2931.67
35.5614	5947.06	2931.53
35.594	5947.99	2929.77
35.6266	5938.12	2928.26
35.6593	5938	2923.66
35.6919	5937.39	2930.86
35.7245	5931.96	2929.26
35.7572	5928.53	2925.33
35.7898	5925.26	2924.05
35.8225	5930.09	2920.21
35.8551	5931.88	2925.07
35.8877	5924.61	2916.72
35.9204	5923.47	2913.58
35.953	5914.64	2913.63
35.9856	5911.12	2913.71
36.0183	5901.3	2907.93
36.0509	5902.46	2906.88
36.0836	5903.05	2913.38
36.1162	5899.52	2912.17
36.1488	5896.06	2906.83
36.1815	5891.05	2906.33
36.2141	5885.29	2905.09
36.2467	5888.55	2905.12
36.2794	5889.23	2897.6
36.312	5888.86	2900.29
36.3446	5886.37	2901.8
36.3773	5878.78	2902.55
36.4099	5874.52	2902.22
36.4426	5880.18	2896.92
36.4752	5877.96	2893.87
36.5078	5873.58	2895.23
36.5405	5869.79	2892.15
36.5731	5864.93	2892.94
36.6057	5856.16	2888.23
36.6384	5857.42	2891.27
36.671	5857.92	2889.95
36.7037	5858.66	2888.02
36.7363	5853.25	2886.95
36.7689	5849.94	2886.2
36.8016	5840.17	2886.73
36.8342	5842.19	2882.93
36.8668	5844.81	2879.6
36.8995	5843.56	2878.04
36.9321	5838.03	2876.6
36.9648	5829.26	2874.06
36.9974	5827.12	2872.13
37.03	5819.42	2870.69
37.0627	5813.45	2868.69
37.0953	5816.47	2872.32
37.1279	5817.57	2873.63
37.1606	5817.26	2870.41
37.1932	5814.7	2868.75
37.2258	5809.94	2864.9
37.2585	5809.88	2863.25
37.2911	5805.55	2863.08
37.3238	5801.05	2863.74
37.3564	5800.59	2860.08
37.389	5798.59	2856.75
37.4217	5791.62	2861.01
37.4543	5790.29	2860.38
37.4869	5790.6	2856.43
37.5196	5790.44	2854.49
37.5522	5779.63	2855.48
37.5849	5779.44	2853.55
37.6175	5771.79	2851.66
37.6501	5765.85	2848.58
37.6828	5757.04	2849.7
37.7154	5757.23	2847.91
37.748	5753.86	2850.2
37.7807	5746.29	2846.08
37.8133	5749.28	2843.4
37.846	5743.7	2843.56
37.8786	5742.71	2836.13
37.9112	5739.3	2834.75
37.9439	5735.47	2834.75
37.9765	5736.12	2835.13
38.0091	5733.66	2833.32
38.0418	5736.89	2833.66
38.0744	5725.22	2828.37
38.107	5729.67	2827.72
38.1397	5722.65	2829.82
38.1723	5716.54	2830.08
38.205	5710.91	2830.73
38.2376	5707	2825.87
38.2702	5705.83	2820.63
38.3029	5702.69	2818.49
38.3355	5699.92	2822.57
38.3681	5694.47	2822.05
38.4008	5695.13	2822.12
38.4334	5693.99	2819.01
38.4661	5684.91	2814.68
38.4987	5685.3	2816.84
38.5313	5688.65	2813.97
38.564	5684.8	2813.74
38.5966	5673.46	2809.1
38.6292	5677.51	2809.89
38.6619	5671.8	2808.83
38.6945	5671.22	2808.16
38.7272	5673.36	2803.54
38.7598	5670.18	2799.62
38.7924	5660.37	2802.92
38.8251	5658.2	2801.7
38.8577	5652.08	2801.39
38.8903	5649.7	2798.72
38.923	5647.49	2799.88
38.9556	5649.19	2801.09
38.9883	5645.64	2796.39
39.0209	5643.96	2795.29
39.0535	5640.21	2794.4
39.0862	5637.35	2793.19
39.1188	5638.63	2790.19
39.1514	5641.65	2793.4
39.1841	5633.94	2792.08
39.2167	5633.66	2788.61
39.2493	5633.94	2787.46
39.282	5629.03	2784.84
39.3146	5628.07	2782.12
39.3473	5627.4	2778.78
39.3799	5616.84	2778.24
39.4125	5614.96	2776.57
39.4452	5615.16	2772.65
39.4778	5609.61	2774.66
39.5104	5601.64	2773.44
39.5431	5604	2770.51
39.5757	5589.86	2769.56
39.6084	5593.27	2766.17
39.641	5589.77	2766.62
39.6736	5590.24	2766.08
39.7063	5590.38	2764.25
39.7389	5584.2	2763.23
39.7715	5582.01	2760.22
39.8042	5580.56	2757.83
39.8368	5570.7	2754.96
39.8695	5572.58	2753.74
39.9021	5570.09	2746.33
39.9347	5567.95	2751.84
39.9674	5565.81	2757.34
40	5558.29	2750.33
40.0326	5558.91	2748.34
40.0653	5545.94	2747.62
40.0979	5538.38	2746.74
40.1305	5550.35	2745.19
40.1632	5555.06	2746.57
40.1958	5549.93	2745.48
40.2285	5550.84	2745.68
40.2611	5553.32	2745.39
40.2937	5552.63	2746.19
40.3264	5541.27	2741.5
40.359	5540.61	2737.62
40.3916	5536.73	2738.72
40.4243	5530.23	2739.78
40.4569	5520.21	2736.91
40.4896	5522.61	2736.28
40.5222	5518.47	2735.44
40.5548	5517.09	2735
40.5875	5507.78	2734.87
40.6201	5508.52	2734.47
40.6527	5503.78	2728.06
40.6854	5504.66	2727.62
40.718	5492.46	2724.62
40.7507	5493.31	2727.06
40.7833	5496.77	2724.03
40.8159	5493.29	2720
40.8486	5486.57	2724.9
40.8812	5487.27	2721.05
40.9138	5480.03	2720.6
40.9465	5479.17	2720.95
40.9791	5475.72	2718.05
41.0117	5475.12	2713.53
41.0444	5464.8	2709.31
41.077	5467.44	2705.1
41.1097	5471.82	2701.04
41.1423	5463.57	2707.08
41.1749	5458.14	2704.83
41.2076	5463.83	2703.45
41.2402	5460.43	2703.82
41.2728	5455.69	2708.28
41.3055	5458.76	2703.57
41.3381	5452.88	2699.33
41.3708	5454.1	2698.14
41.4034	5449.06	2697.38
41.436	5441.64	2697.32
41.4687	5431.96	2695.15
41.5013	5423.65	2697.01
41.5339	5425.77	2691.09
41.5666	5422.1	2690.08
41.5992	5422.59	2686.62
41.6319	5420.62	2686.87
41.6645	5412.06	2684.22
41.6971	5410.29	2685.37
41.7298	5404.37	2680.31
41.7624	5407.14	2679.91
41.795	5402.19	2679.12
41.8277	5403.6	2672.9
41.8603	5396.78	2678.09
41.893	5396.16	2670.2
41.9256	5398.13	2672.47
41.9582	5390.54	2671.71
41.9909	5385.3	2668.37
42.0235	5381.07	2664.66
42.0561	5380.34	2669.77
42.0888	5380.26	2671.05
42.1214	5378.14	2665.84
42.154	5376.32	2663.2
42.1867	5371.72	2661.08
42.2193	5372.53	2663.54
42.252	5368.15	2659.92
42.2846	5365.2	2659.7
42.3172	5371.09	2654.58
42.3499	5373.33	2655.47
42.3825	5368.39	2656.36
42.4151	5361.11	2655.96
42.4478	5362.67	2651.38
42.4804	5361.14	2651.53
42.5131	5357.42	2648.72
42.5457	5350.13	2648.17
42.5783	5356.64	2648.66
42.611	5354.07	2647.33
42.6436	5348.7	2648.17
42.6762	5347.64	2647.09
42.7089	5341.81	2646.33
42.7415	5337.44	2644.23
42.7742	5334.22	2644.07
42.8068	5329.12	2641.39
42.8394	5324.08	2643.85
42.8721	5317.88	2640.68
42.9047	5306.57	2639.24
42.9373	5307.7	2636.03
42.97	5303.98	2633.95
43.0026	5299.62	2631.53
43.0352	5296.16	2627.93
43.0679	5292.02	2627.21
43.1005	5294.58	2622.43
43.1332	5292.67	2620.84
43.1658	5292.95	2623.94
43.1984	5287.43	2623.9
43.2311	5292.7	2623.48
43.2637	5287.12	2623.1
43.2963	5279.15	2618.59
43.329	5279.75	2614.96
43.3616	5281.73	2616.08
43.3943	5273.52	2615.14
43.4269	5270.85	2608.12
43.4595	5270	2608.63
43.4922	5263.52	2615.6
43.5248	5264.26	2613.64
43.5574	5263.36	2608.82
43.5901	5261.56	2607
43.6227	5254.38	2608.28
43.6554	5253.78	2606.22
43.688	5251.75	2605.16
43.7206	5255.22	2602.43
43.7533	5243.21	2602.5
43.7859	5244.19	2599.89
43.8185	5236.45	2598.04
43.8512	5236.2	2594.39
43.8838	5234.9	2588.75
43.9164	5232.22	2587.44
43.9491	5228.25	2585.05
43.9817	5223.05	2584.67
44.0144	5222.39	2587.56
44.047	5219.4	2589.39
44.0796	5218.33	2588.89
44.1123	5212.07	2585.18
44.1449	5208.48	2579.48
44.1775	5206.93	2580.47
44.2102	5208.64	2579.61
44.2428	5203.95	2577.68
44.2755	5200.44	2575.2
44.3081	5197.93	2575.14
44.3407	5197.25	2572.69
44.3734	5193.36	2572.56
44.406	5191.12	2570.4
44.4386	5193.53	2567
44.4713	5186.19	2567.61
44.5039	5182.64	2564.64
44.5366	5187.11	2563.61
44.5692	5182.76	2565.45
44.6018	5177.01	2563.49
44.6345	5176.32	2561.91
44.6671	5173.98	2558.34
44.6997	5166.95	2557.97
44.7324	5165.41	2552.71
44.765	5167.7	2557.89
44.7977	5162.16	2554.78
44.8303	5154.43	2554.07
44.8629	5161.59	2552.29
44.8956	5151.2	2547.75
44.9282	5156.21	2543.11
44.9608	5158.87	2548.99
44.9935	5159.99	2543.72
45.0261	5144.72	2545.17
45.0587	5143.16	2544.44
45.0914	5146.17	2538.51
45.124	5138.57	2540.13
45.1567	5139.36	2534.42
45.1893	5138.39	2535.48
45.2219	5131.37	2534.52
45.2546	5133.75	2531.16
45.2872	5128.45	2529.95
45.3198	5133.98	2529.24
45.3525	5127.25	2530.02
45.3851	5124.97	2528.89
45.4178	5119.94	2527.8
45.4504	5120.47	2524.69
45.483	5121.69	2526.6
45.5157	5123.39	2525.95
45.5483	5108.95	2520.8
45.5809	5110.19	2522.94
45.6136	5107.17	2517.75
45.6462	5105.77	2516.84
45.6789	5105.76	2509.83
45.7115	5099.99	2513.82
45.7441	5102.49	2511.88
45.7768	5099.7	2510.27
45.8094	5096.27	2513.59
45.842	5094.31	2508.33
45.8747	5089.43	2509.28
45.9073	5085.36	2506.15
45.9399	5082.29	2499.96
45.9726	5083.87	2498.89
46.0052	5081.12	2498.87
46.0379	5083.17	2496.8
46.0705	5072.36	2497.22
46.1031	5076.13	2493.38
46.1358	5068.57	2499.03
46.1684	5068.43	2494.11
46.201	5071.26	2492.46
46.2337	5071.3	2489.07
46.2663	5066.72	2485.12
46.299	5066.27	2485.28
46.3316	5060.5	2484.45
46.3642	5054.13	2478.62
46.3969	5050.49	2475.24
46.4295	5047.23	2477.94
46.4621	5052.76	2475.58
46.4948	5049.61	2472.81
46.5274	5044.54	2471.34
46.5601	5045.97	2469.64
46.5927	5043.08	2471.33
46.6253	5042.3	2470.51
46.658	5047.45	2466.19
46.6906	5035.64	2463.46
46.7232	5030.2	2458.76
46.7559	5032.13	2461.97
46.7885	5031.99	2460.75
46.8211	5031.03	2459.88
46.8538	5027.41	2457.67
46.8864	5019.1	2454.6
46.9191	5024.87	2452.87
46.9517	5019.24	2451.5
46.9843	5011.54	2449.16
47.017	5021.03	2446.56
47.0496	5020.96	2441.9
47.0822	5020.43	2443.24
47.1149	5022.67	2444.21
47.1475	5012.92	2442.26
47.1802	5010.52	2440.3
47.2128	5002.21	2441.57
47.2454	4999.09	2440.3
47.2781	5002.88	2437.72
47.3107	5004.99	2437.36
47.3433	5003.86	2435.04
47.376	5004.79	2429.97
47.4086	4992.69	2433.38
47.4413	4990.68	2430.51
47.4739	4980.6	2429.85
47.5065	4981.29	2427.87
47.5392	4978.36	2425.72
47.5718	4976.33	2420.9
47.6044	4973.3	2419.32
47.6371	4968.37	2416.36
47.6697	4972.88	2416.05
47.7023	4968.52	2414.36
47.735	4968.56	2412.31
47.7676	4962.99	2407.31
47.8003	4969.9	2411.67
47.8329	4968.37	2409.41
47.8655	4963.42	2404.53
47.8982	4961.11	2405.17
47.9308	4956.02	2406.71
47.9634	4951.11	2402.8
47.9961	4953.79	2402.65
48.0287	4947.84	2399.35
48.0614	4949.6	2399.49
48.094	4952.8	2396.76
48.1266	4961.71	2396.28
48.1593	4951.66	2394.22
48.1919	4947.18	2391.59
48.2245	4945.74	2389.7
48.2572	4934.86	2393.98
48.2898	4940.02	2391.27
48.3225	4936.48	2384.14
48.3551	4934.7	2383.78
48.3877	4931.45	2385.43
48.4204	4934.92	2384.01
48.453	4934.13	2386.86
48.4856	4936.88	2381.08
48.5183	4933.36	2380.75
48.5509	4930.17	2380.6
48.5836	4929.04	2376.83
48.6162	4929.77	2373.87
48.6488	4925.97	2373.43
48.6815	4925.32	2369.83
48.7141	4928.78	2368.68
48.7467	4929.72	2370.61
48.7794	4927.62	2370.31
48.812	4926.6	2363.27
48.8446	4926.26	2361.05
48.8773	4920.17	2362.03
48.9099	4929.09	2357.37
48.9426	4930.86	2355.97
48.9752	4934.3	2355.89
49.0078	4929.17	2352.63
49.0405	4926.55	2347.64
49.0731	4929.36	2353.65
49.1057	4927.76	2353.49
49.1384	4922.01	2348.1
49.171	4921.11	2348
49.2037	4919.44	2344.24
49.2363	4921.99	2347.25
49.2689	4914.73	2340.72
49.3016	4907.95	2341.39
49.3342	4909.04	2339.95
49.3668	4909.16	2332.27
49.3995	4908.29	2336.78
49.4321	4906.34	2338.37
49.4648	4907.89	2334.33
49.4974	4910.66	2330.85
49.53	4901.2	2331.66
49.5627	4895.21	2329.71
49.5953	4906.49	2331.62
49.6279	4911.34	2328.87
49.6606	4902.79	2328.15
49.6932	4910.5	2323.75
49.7258	4901.84	2323.68
49.7585	4904.42	2322.56
49.7911	4905.56	2321.16
49.8238	4908.67	2319.47
49.8564	4904.21	2318.37
49.889	4902.63	2316.77
49.9217	4901.94	2317.14
49.9543	4902.59	2313.71
49.9869	4900.61	2320.51
50.0196	4903.72	2315.54
50.0522	4896.2	2310.85
50.0849	4904.21	2307.65
50.1175	4903.66	2312.73
50.1501	4903.64	2309.27
50.1828	4900.29	2304.3
50.2154	4899.95	2304.22
50.248	4903.51	2305.18
50.2807	4905.48	2304.88
50.3133	4906.03	2299.82
50.346	4902.31	2300.35
50.3786	4902.43	2304.34
50.4112	4904.82	2301.61
50.4439	4904.72	2300.55
50.4765	4910.49	2296.47
50.5091	4913.52	2300.15
50.5418	4910.4	2295.04
50.5744	4900.9	2299.76
50.607	4908.79	2293.39
50.6397	4906.06	2293.74
50.6723	4912.07	2289.28
50.705	4914.02	2290.65
50.7376	4912.77	2288.85
50.7702	4905.41	2284.8
50.8029	4909.95	2284.19
50.8355	4910.92	2282.66
50.8681	4911.1	2281.23
50.9008	4902.66	2285.21
50.9334	4911.48	2283.02
50.9661	4908.61	2286.44
50.9987	4914.21	2282.03
51.0313	4911.23	2281.68
51.064	4915.23	2277.87
51.0966	4906.2	2280.56
51.1292	4915.23	2275.45
51.1619	4917.68	2278.12
51.1945	4917.63	2273.92
51.2272	4920.65	2272.72
51.2598	4921.96	2270.65
51.2924	4910.68	2272.21
51.3251	4917.03	2267.43
51.3577	4914.52	2268.26
51.3903	4913.68	2265.72
51.423	4912.06	2264.16
51.4556	4921.38	2261.97
51.4883	4916.79	2266.24
51.5209	4917.58	2264.24
51.5535	4919.78	2260.26
51.5862	4923.95	2260.37
51.6188	4926.72	2258.9
51.6514	4925.63	2260.27
51.6841	4933.93	2257.99
51.7167	4934.02	2252.97
51.7493	4934.48	2251.33
51.782	4933.15	2250.82
51.8146	4934.5	2247.41
51.8473	4929.36	2245.28
51.8799	4930.86	2245.72
51.9125	4931.15	2244.61
51.9452	4927.21	2242.63
51.9778	4931.94	2244.74
52.0104	4935.85	2242.34
52.0431	4929.46	2236.92
52.0757	4931.32	2239.98
52.1084	4939.68	2240.81
52.141	4938.32	2241.05
52.1736	4939.59	2235.01
52.2063	4944.67	2233.46
52.2389	4932.94	2232.51
52.2715	4940.24	2233.77
52.3042	4938.35	2236
52.3368	4943.44	2234.4
52.3695	4936.75	2235.75
52.4021	4937.16	2234.11
52.4347	4935.36	2230.68
52.4674	4937.02	2230.96
52.5	4940.83	2229.8
52.5326	4945.27	2229.5
52.5653	4943.3	2226.21
52.5979	4947.34	2219.75
52.6305	4947.77	2223.28
52.6632	4951.4	2220.45
52.6958	4956.02	2219.52
52.7285	4958.63	2213.67
52.7611	4952.95	2214.17
52.7937	4951.97	2211.37
52.8264	4957.09	2212.45
52.859	4952.21	2214.28
52.8916	4953.55	2211.18
52.9243	4951.46	2210.12
52.9569	4955.46	2211.14
52.9896	4950.9	2208.22
53.0222	4952	2207.48
53.0548	4954.41	2207.12
53.0875	4954.32	2205.07
53.1201	4958.07	2201.37
53.1527	4960.3	2202.5
53.1854	4957.32	2200.13
53.218	4963.43	2199.09
53.2507	4965.67	2194.06
53.2833	4968.32	2197.33
53.3159	4965.34	2194.43
53.3486	4967.3	2193.28
53.3812	4965.66	2192.51
53.4138	4970.65	2188.57
53.4465	4967.18	2185.55
53.4791	4979.41	2190.11
53.5117	4974.38	2190.15
53.5444	4973.77	2188.54
53.577	4970.1	2185.67
53.6097	4976.78	2184.9
53.6423	4975.94	2181.42
53.6749	4975.32	2185.13
53.7076	4975.47	2181.81
53.7402	4974.73	2179.83
53.7728	4978.48	2179.74
53.8055	4983.77	2177.44
53.8381	4982.24	2177.92
53.8708	4979.06	2177.88
53.9034	4984.06	2175.01
53.936	4991.1	2173.19
53.9687	4984.01	2172.69
54.0013	4987.42	2169.4
54.0339	4993.31	2171.56
54.0666	4999.56	2174.53
54.0992	5001.49	2168.2
54.1319	4997.94	2166.99
54.1645	5003.9	2168.17
54.1971	5007.01	2168.5
54.2298	5001.09	2165.53
54.2624	5002.07	2165.93
54.295	5006.05	2165.06
54.3277	5004.2	2165.66
54.3603	5006.5	2168.97
54.393	5011.48	2166.96
54.4256	5006.95	2160.46
54.4582	5010.12	2158.28
54.4909	5006.78	2157.28
54.5235	5008.28	2154.33
54.5561	5011.58	2154.94
54.5888	5011.15	2152.58
54.6214	5010.46	2149
54.654	5017.84	2151.26
54.6867	5013.22	2152.81
54.7193	5025.24	2153.4
54.752	5022.2	2149.32
54.7846	5021.82	2148.19
54.8172	5023.38	2149.39
54.8499	5026.43	2145.95
54.8825	5032.8	2147.2
54.9151	5028.47	2143.63
54.9478	5027.92	2139.85
54.9804	5032.09	2139.02
55.0131	5030.74	2137.33
55.0457	5030.96	2136.59
55.0783	5039.67	2137.33
55.111	5039.47	2139.84
55.1436	5037.03	2135.76
55.1762	5043.67	2135.45
55.2089	5047.64	2130.99
55.2415	5044.15	2129.71
55.2742	5043.49	2131.1
55.3068	5043.82	2134.06
55.3394	5049.86	2128.45
55.3721	5050.42	2129.7
55.4047	5047.53	2126.42
55.4373	5054.71	2123.91
55.47	5056.96	2120.79
55.5026	5057.4	2120.33
55.5352	5059	2123.6
55.5679	5059.05	2122.41
55.6005	5064.82	2120.02
55.6332	5063.97	2117.98
55.6658	5060.3	2120.78
55.6984	5065.62	2117.7
55.7311	5069.53	2115.08
55.7637	5069.48	2114.92
55.7963	5070.51	2112.72
55.829	5072.42	2109.6
55.8616	5078.9	2108.8
55.8943	5083.6	2110.74
55.9269	5083.13	2111.87
55.9595	5079.22	2107.39
55.9922	5083.72	2105.02
56.0248	5084.72	2104.66
56.0574	5087.06	2103.12
56.0901	5090.56	2106.09
56.1227	5092.35	2105.37
56.1554	5092.76	2101.47
56.188	5096.31	2096.33
56.2206	5096.85	2099.75
56.2533	5099.74	2096.88
56.2859	5101.78	2097.15
56.3185	5105.64	2091.94
56.3512	5107.3	2098.07
56.3838	5111.58	2093.19
56.4164	5105.23	2092.59
56.4491	5106.97	2094.35
56.4817	5113.19	2093.52
56.5144	5115.93	2091.74
56.547	5115.47	2088.96
56.5796	5124.04	2091.16
56.6123	5116.77	2088.74
56.6449	5116.56	2087.23
56.6775	5129.16	2086.8
56.7102	5125.48	2083.55
56.7428	5132.3	2085.31
56.7755	5130.58	2085.04
56.8081	5126.81	2080.78
56.8407	5134.12	2078.13
56.8734	5136.26	2079.92
56.906	5132.77	2078.72
56.9386	5141.22	2073
56.9713	5147.52	2075.9
57.0039	5143.38	2074.88
57.0366	5145.21	2077.04
57.0692	5143.24	2073.05
57.1018	5146.26	2071.04
57.1345	5159.29	2073.14
57.1671	5159.42	2070.84
57.1997	5161.05	2071.99
57.2324	5166.03	2067.51
57.265	5155.8	2066.82
57.2977	5163.88	2064.27
57.3303	5170.71	2062.65
57.3629	5168.36	2066.45
57.3956	5169.35	2067.06
57.4282	5174.48	2062.45
57.4608	5176.94	2061.77
57.4935	5176.38	2057.62
57.5261	5183.61	2058.38
57.5587	5181.37	2058.75
57.5914	5185.4	2053.93
57.624	5184.29	2053.97
57.6567	5184.17	2049.74
57.6893	5183.6	2054.86
57.7219	5187.26	2056.06
57.7546	5190.09	2052.76
57.7872	5195.22	2050.38
57.8198	5199.76	2049.61
57.8525	5203.53	2054.04
57.8851	5204.89	2046.34
57.9178	5207.98	2045.17
57.9504	5205.35	2046.26
57.983	5208.52	2043.84
58.0157	5210.03	2040.2
58.0483	5214.22	2039.26
58.0809	5220.14	2040.84
58.1136	5221.43	2040.29
58.1462	5218.95	2037.3
58.1789	5223.94	2034.52
58.2115	5222.06	2035.92
58.2441	5228.05	2034.28
58.2768	5232.79	2032.6
58.3094	5232.83	2032.36
58.342	5230.26	2028.38
58.3747	5233.87	2030.22
58.4073	5240.7	2030.5
58.4399	5246.3	2025.25
58.4726	5248.98	2030.19
58.5052	5247.26	2028.03
58.5379	5251.1	2021.33
58.5705	5255.98	2022.18
58.6031	5264.65	2024.17
58.6358	5260.57	2026.83
58.6684	5261.19	2023.75
58.701	5261.16	2018.95
58.7337	5262.1	2024.18
58.7663	5265.78	2020.95
58.799	5264.42	2021.47
58.8316	5269.14	2018.25
58.8642	5276.33	2011.36
58.8969	5272.56	2009.85
58.9295	5270.34	2011.96
58.9621	5275.47	2012.06
58.9948	5281.08	2013.61
59.0274	5279.47	2009.59
59.0601	5285.11	2009.08
59.0927	5284.1	2008.81
59.1253	5283.12	2005.7
59.158	5284.23	2002.71
59.1906	5284.97	2004.99
59.2232	5288.87	2004.87
59.2559	5290.46	2002.53
59.2885	5291.32	1999.42
59.3211	5290.57	1997.99
59.3538	5290.21	2000.88
59.3864	5295.19	1999.05
59.4191	5299.16	1996.05
59.4517	5299.79	1994.86
59.4843	5298.45	1992.21
59.517	5300.15	1990.72
59.5496	5304.8	1992.28
59.5822	5304.34	1989.49
59.6149	5308.17	1986.63
59.6475	5310.22	1983.54
59.6802	5308.86	1982.34
59.7128	5314.16	1985.29
59.7454	5314.91	1987.77
59.7781	5320.77	1985.2
59.8107	5318.43	1983
59.8433	5321.44	1982.73
59.876	5320.46	1984.12
59.9086	5320.47	1982.53
59.9413	5326.92	1980.68
59.9739	5331.11	1980.75
60.0065	5323.88	1980.45
60.0392	5325.19	1975.75
60.0718	5332.06	1975.81
60.1044	5335.35	1971.82
60.1371	5337.89	1973.21
60.1697	5342.07	1973.16
60.2023	5343.84	1970.52
60.235	5351.75	1969.33
60.2676	5340.93	1968.41
60.3003	5343.08	1965.22
60.3329	5345.8	1962.33
60.3655	5345.63	1960.14
60.3982	5345.65	1965.1
60.4308	5346.06	1964.03
60.4634	5346.7	1960.99
60.4961	5348.27	1958.9
60.5287	5357.68	1958.64
60.5614	5364.44	1954.45
60.594	5350.37	1957.48
60.6266	5353.24	1955.41
60.6593	5364.62	1956.23
60.6919	5369.1	1952.02
60.7245	5367.37	1955.12
60.7572	5368.42	1954.23
60.7898	5366.53	1952.71
60.8225	5369.64	1951.95
60.8551	5363.86	1949
60.8877	5366.24	1947.3
60.9204	5376.76	1944.34
60.953	5378.84	1946.73
60.9856	5377.39	1943.53
61.0183	5380.12	1940
61.0509	5383.75	1942.8
61.0836	5387.12	1939.67
61.1162	5384.87	1940.47
61.1488	5385.72	1936.48
61.1815	5386.47	1938.68
61.2141	5387.94	1936.43
61.2467	5382.35	1936.26
61.2794	5379.95	1931.11
61.312	5389.19	1932.28
61.3446	5395.2	1929.19
61.3773	5384.84	1932.35
61.4099	5386.94	1929.39
61.4426	5388.25	1924.17
61.4752	5392.92	1921.66
61.5078	5389.58	1929.44
61.5405	5387.53	1929.84
61.5731	5394.8	1926.35
61.6057	5394.89	1921.1
61.6384	5399.11	1922.49
61.671	5392.95	1922.84
61.7037	5391.12	1921.99
61.7363	5392.03	1922.28
61.7689	5402.83	1918.44
61.8016	5400.4	1917.43
61.8342	5399.22	1915.88
61.8668	5402.45	1914.97
61.8995	5398.47	1916.44
61.9321	5398.62	1913.3
61.9648	5401.9	1914.42
61.9974	5406.33	1909.65
62.03	5405.16	1914.58
62.0627	5404.14	1914.27
62.0953	5402.85	1908.68
62.1279	5404.69	1906.39
62.1606	5404.07	1912.08
62.1932	5402.55	1906.64
62.2258	5402.74	1901.22
62.2585	5404.23	1901.93
62.2911	5404.09	1903.46
62.3238	5402.94	1901.64
62.3564	5401.97	1899.24
62.389	5402.65	1898.57
62.4217	5403.38	1896.91
62.4543	5395.64	1895.46
62.4869	5401.23	1896.51
62.5196	5409.15	1900.14
62.5522	5405.11	1899.13
62.5849	5405.92	1895.55
62.6175	5403.18	1893.15
62.6501	5404.26	1893.37
62.6828	5403.42	1887.35
62.7154	5402.82	1888.19
62.748	5405.59	1882.47
62.7807	5401.77	1887.31
62.8133	5404.37	1884.29
62.846	5402.51	1882.73
62.8786	5404.39	1882.09
62.9112	5406.45	1883.5
62.9439	5406.99	1882.49
62.9765	5405.22	1881.63
63.0091	5407.23	1878.74
63.0418	5403.33	1877.03
63.0744	5408.49	1875.98
63.107	5396.78	1875.79
63.1397	5395.87	1875.6
63.1723	5400.45	1873.94
63.205	5404.57	1872.27
63.2376	5407.59	1871.09
63.2702	5402.7	1870.84
63.3029	5405.25	1870.05
63.3355	5404.37	1867
63.3681	5399.2	1868.37
63.4008	5399.19	1867.35
63.4334	5403.28	1863.55
63.4661	5401.57	1863.8
63.4987	5394.99	1865.53
63.5313	5403.37	1862.07
63.564	5397.36	1855.92
63.5966	5399.57	1856.93
63.6292	5403.1	1857.83
63.6619	5398.03	1857.45
63.6945	5391.85	1857.03
63.7272	5395.75	1855.77
63.7598	5397.49	1855.1
63.7924	5393.22	1852.14
63.8251	5389.34	1851.01
63.8577	5389.1	1851.44
63.8903	5388.76	1850.07
63.923	5388.29	1849.06
63.9556	5389.7	1848.43
63.9883	5388.64	1846.12
64.0209	5398.06	1842.76
64.0535	5390.02	1844.5
64.0862	5389.27	1844.29
64.1188	5379.13	1840.91
64.1514	5381.39	1839.12
64.1841	5383.23	1844.43
64.2167	5380.88	1843.61
64.2493	5381.31	1841.11
64.282	5383.89	1838.13
64.3146	5382.44	1839.11
64.3473	5378.53	1838.27
64.3799	5380.17	1838.25
64.4125	5378.55	1836.41
64.4452	5368.78	1837.2
64.4778	5371.61	1835.96
64.5104	5379.3	1831.78
64.5431	5376.49	1830.01
64.5757	5371.23	1826.12
64.6084	5369.45	1826.13
64.641	5371.23	1826.72
64.6736	5370.96	1823
64.7063	5370.41	1825.34
64.7389	5365.11	1823.52
64.7715	5359.2	1822.02
64.8042	5363.27	1817.58
64.8368	5355.12	1820.89
64.8695	5355.41	1816.96
64.9021	5356.63	1820.64
64.9347	5349.66	1817.49
64.9674	5354.41	1816.94
65	5352.63	1812.03
65.0326	5352.56	1812.88
65.0653	5348.59	1808.68
65.0979	5345.8	1805.59
65.1305	5348.4	1803.98
65.1632	5342.72	1811
65.1958	5345.99	1808.46
65.2285	5345.51	1807.11
65.2611	5343.48	1805.77
65.2937	5339	1807.29
65.3264	5336.91	1806.32
65.359	5335.95	1803.51
65.3916	5335.29	1801.11
65.4243	5335.18	1799.6
65.4569	5336.13	1799.85
65.4896	5335.4	1795.45
65.5222	5331.94	1796.25
65.5548	5329.58	1797.86
65.5875	5323.52	1795.72
65.6201	5322.44	1795.83
65.6527	5320.47	1792.59
65.6854	5317.73	1789.47
65.718	5320.91	1788.49
65.7507	5318.43	1790.53
65.7833	5312.45	1790.04
65.8159	5316.62	1786.16
65.8486	5309.14	1789.67
65.8812	5312.81	1784.51
65.9138	5309.96	1783.44
65.9465	5310.34	1783.42
65.9791	5300.2	1781.85
66.0117	5300.23	1782.16
66.0444	5292.69	1781.07
66.077	5295.57	1781.01
66.1097	5298.05	1777.43
66.1423	5293.87	1776.73
66.1749	5297.99	1778.46
66.2076	5293.28	1774.72
66.2402	5288.72	1776.25
66.2728	5292.25	1774.51
66.3055	5285.88	1773.63
66.3381	5284.02	1773.05
66.3708	5282.07	1767.4
66.4034	5283.39	1764.86
66.436	5268.15	1769.27
66.4687	5271.98	1765.78
66.5013	5274.93	1764.85
66.5339	5272.57	1764.6
66.5666	5264.66	1763.86
66.5992	5266.05	1762.47
66.6319	5261.29	1760.87
66.6645	5262.23	1760.03
66.6971	5261.26	1762.59
66.7298	5263.98	1761.18
66.7624	5253.09	1755.8
66.795	5250.93	1754.8
66.8277	5247.16	1755.06
66.8603	5252.61	1753.73
66.893	5250.31	1753.14
66.9256	5246	1753.35
66.9582	5239.47	1753.16
66.9909	5236.34	1750.75
67.0235	5238.76	1748.33
67.0561	5235.8	1745.42
67.0888	5230.68	1743.82
67.1214	5226.85	1744.58
67.154	5226.89	1744.5
67.1867	5230.07	1742.79
67.2193	5220.64	1744.14
67.252	5221	1743.81
67.2846	5224.57	1742.12
67.3172	5218.97	1739.94
67.3499	5213.91	1735.76
67.3825	5212.25	1736.22
67.4151	5211.36	1737.08
67.4478	5209.7	1734.09
67.4804	5207.23	1729.73
67.5131	5204.23	1733.18
67.5457	5200.53	1733.87
67.5783	5201.24	1733.09
67.611	5200.11	1731.87
67.6436	5195.51	1730.31
67.6762	5196.17	1730.41
67.7089	5196.39	1728.07
67.7415	5192.19	1726.24
67.7742	5188.65	1724.28
67.8068	5186.28	1721.93
67.8394	5181.97	1722.74
67.8721	5182.82	1722.05
67.9047	5176.69	1718.76
67.9373	5174.89	1719.72
67.97	5172.92	1717.53
68.0026	5173.16	1714.25
68.0352	5168.43	1713.67
68.0679	5163.65	1712.04
68.1005	5164.63	1711.89
68.1332	5159.2	1708.01
68.1658	5157.26	1712.33
68.1984	5149.11	1709.95
68.2311	5158.75	1708.15
68.2637	5155.61	1704.46
68.2963	5152.6	1705.08
68.329	5153.84	1704.83
68.3616	5143.75	1706.22
68.3943	5140.93	1704.25
68.4269	5140.86	1705.52
68.4595	5142.73	1704.68
68.4922	5142.25	1699.42
68.5248	5137.34	1698.38
68.5574	5134.75	1699.36
68.5901	5128.51	1700.21
68.6227	5125.25	1699.07
68.6554	5125.84	1697.1
68.688	5121.11	1695.94
68.7206	5122.47	1693.74
68.7533	5118.56	1693.28
68.7859	5116.85	1689.67
68.8185	5113.27	1691.24
68.8512	5112.87	1691.59
68.8838	5107.7	1690
68.9164	5106.57	1689.23
68.9491	5104.32	1687.54
68.9817	5102.98	1685.09
69.0144	5093.95	1687.02
69.047	5091.81	1685.83
69.0796	5087.52	1685.43
69.1123	5086.75	1682.86
69.1449	5086.89	1687.48
69.1775	5076.31	1684.08
69.2102	5076.72	1680.76
69.2428	5078.85	1679.82
69.2755	5073.12	1679.13
69.3081	5068.17	1677.34
69.3407	5069.73	1673.3
69.3734	5073.3	1669.16
69.406	5070.91	1672.66
69.4386	5071.44	1672.82
69.4713	5060.83	1674.7
69.5039	5060.69	1670.81
69.5366	5054.93	1670.41
69.5692	5054.32	1668.62
69.6018	5050.2	1667.17
69.6345	5050.92	1664.02
69.6671	5037.34	1669.04
69.6997	5040.58	1665.63
69.7324	5043.37	1662.98
69.765	5039.69	1661.83
69.7977	5036.98	1659.71
69.8303	5034.61	1657.1
69.8629	5030.93	1661.29
69.8956	5030.75	1659.34
69.9282	5022.45	1661.17
69.9608	5022.65	1659.5
69.9935	5025.29	1658.8
70.0261	5028.04	1655.17
70.0587	5023.71	1653.67
70.0914	5019.17	1654.63
70.124	5003.76	1652.21
70.1567	5002.14	1650.14
70.1893	5008.78	1651.59
70.2219	5006.85	1647.84
70.2546	4996.69	1645.51
70.2872	4996.88	1645.08
70.3198	4996.44	1646.61
70.3525	4993.43	1645.43
70.3851	4994.29	1641.55
70.4178	4990.11	1641.75
70.4504	4977.95	1642.76
70.483	4977.62	1642.69
70.5157	4977.97	1640.92
70.5483	4976.37	1640.28
70.5809	4973.53	1639.1
70.6136	4968.31	1635.09
70.6462	4967.12	1633.22
70.6789	4967.49	1630.89
70.7115	4963.9	1626.1
70.7441	4956.94	1631.29
70.7768	4955.03	1630.64
70.8094	4950.12	1629.89
70.842	4949.83	1628.24
70.8747	4946.31	1627.47
70.9073	4944.04	1625.26
70.9399	4938.71	1627.28
70.9726	4936.81	1626.05
71.0052	4932.7	1625.48
71.0379	4932.05	1622.11
71.0705	4932.7	1625.03
71.1031	4936.78	1621.72
71.1358	4926.61	1622.68
71.1684	4919.97	1619.08
71.201	4915.29	1618.64
71.2337	4913.26	1616.86
71.2663	4913.58	1614.16
71.299	4912.43	1614.7
71.3316	4912.23	1611.95
71.3642	4910.31	1611.34
71.3969	4902.19	1612.9
71.4295	4899.15	1609.76
71.4621	4894.27	1608.6
71.4948	4894.42	1607.78
71.5274	4893.63	1608.23
71.5601	4890.33	1607.69
71.5927	4884.08	1611.43
71.6253	4887.08	1606.32
71.658	4884.4	1607.33
71.6906	4883.09	1604.02
71.7232	4875.65	1602.56
71.7559	4871.27	1601.15
71.7885	4867.53	1602.46
71.8211	4866.9	1600.47
71.8538	4864.27	1596.76
71.8864	4857.41	1598.04
71.9191	4851.12	1593.48
71.9517	4853.78	1595.09
71.9843	4857.17	1596.72
72.017	4850.14	1594.72
72.0496	4850.32	1595.3
72.0822	4845.86	1592.76
72.1149	4839.03	1592.24
72.1475	4839.76	1591.74
72.1802	4834.46	1590.43
72.2128	4833.22	1587.92
72.2454	4826.75	1584.03
72.2781	4825.08	1585.58
72.3107	4826.58	1585.04
72.3433	4821.14	1585.06
72.376	4818.47	1584.78
72.4086	4819.57	1581.36
72.4413	4814.8	1577.9
72.4739	4820.82	1581.68
72.5065	4822.48	1578.98
72.5392	4808.52	1579.54
72.5718	4805.86	1579.49
72.6044	4809.12	1577.55
72.6371	4803.86	1573.11
72.6697	4805.87	1574.44
72.7023	4800.5	1569.45
72.735	4796.43	1573.1
72.7676	4791.32	1572.57
72.8003	4787.15	1571.3
72.8329	4785.31	1568.04
72.8655	4782.84	1568.95
72.8982	4780.96	1567.89
72.9308	4774.83	1566.15
72.9634	4776.79	1567.42
72.9961	4777.24	1567.19
73.0287	4775.59	1565.84
73.0614	4767.6	1562.51
73.094	4764.56	1561.3
73.1266	4758.23	1562.05
73.1593	4757.61	1560.15
73.1919	4752.85	1562.53
73.2245	4750.96	1559.54
73.2572	4749.2	1560.09
73.2898	4743.6	1556.7
73.3225	4742.09	1556.48
73.3551	4740.92	1556.19
73.3877	4739.54	1553.67
73.4204	4741.68	1553.65
73.453	4729.81	1555.34
73.4856	4733.24	1551.13
73.5183	4726.74	1552.19
73.5509	4722.48	1550.49
73.5836	4709.71	1548.38
73.6162	4713.52	1547.02
73.6488	4717.13	1548.23
73.6815	4710.78	1545.42
73.7141	4708.08	1544.64
73.7467	4707.06	1540.98
73.7794	4701.83	1543.98
73.812	4700.44	1540.35
73.8446	4697.41	1542.21
73.8773	4698.44	1540.69
73.9099	4694.8	1541.42
73.9426	4696.05	1539.04
73.9752	4687.74	1534.91
74.0078	4683.31	1534.93
74.0405	4680.23	1537.66
74.0731	4678.18	1537.93
74.1057	4676.45	1536.52
74.1384	4671.69	1531.77
74.171	4671.47	1527.24
74.2037	4670.79	1529.57
74.2363	4667.5	1530.43
74.2689	4662.27	1527.71
74.3016	4663.53	1523.6
74.3342	4656.7	1526.15
74.3668	4659.69	1525.26
74.3995	4653.67	1527.7
74.4321	4646.84	1521.93
74.4648	4646.95	1522.37
74.4974	4644.26	1522.11
74.53	4640.21	1516.93
74.5627	4637.81	1517.54
74.5953	4634.09	1516.35
74.6279	4634.85	1512.2
74.6606	4629	1517.21
74.6932	4626.15	1514.34
74.7258	4619.63	1513.32
74.7585	4620.35	1515.84
74.7911	4612.98	1516.13
74.8238	4612.3	1512.27
74.8564	4619.3	1511.78
74.889	4615.04	1507.99
74.9217	4609.55	1508.49
74.9543	4607.51	1506.32
74.9869	4596.43	1508.36
75.0196	4593.66	1505.48
75.0522	4592.17	1504.3
75.0849	4591.64	1504.81
75.1175	4589.5	1503.57
75.1501	4586.4	1500.89
75.1828	4585.21	1499.86
75.2154	4581.08	1500.13
75.248	4580.77	1497.86
75.2807	4578.17	1496.22
75.3133	4572.01	1494.09
75.346	4572.93	1494.16
75.3786	4567.54	1495.25
75.4112	4566.86	1497.3
75.4439	4561.99	1492.31
75.4765	4553.71	1493.1
75.5091	4553.65	1493.58
75.5418	4556	1494.72
75.5744	4554.69	1489.74
75.607	4547.54	1489.25
75.6397	4547	1487.5
75.6723	4543.71	1484.55
75.705	4540.72	1485.68
75.7376	4532.57	1488.44
75.7702	4529.75	1484.66
75.8029	4524.59	1484.6
75.8355	4525.68	1482.38
75.8681	4522.74	1481.93
75.9008	4522.42	1479.87
75.9334	4518.7	1476.86
75.9661	4515.11	1476.15
75.9987	4510.08	1475.86
76.0313	4507.45	1473.68
76.064	4508.35	1474.29
76.0966	4505.56	1475.72
76.1292	4501.73	1475.14
76.1619	4494.08	1476.42
76.1945	4492.5	1475.45
76.2272	4497	1470.08
76.2598	4488.82	1466.55
76.2924	4486.5	1470.69
76.3251	4481.46	1471
76.3577	4485.07	1472.39
76.3903	4480.49	1470.4
76.423	4478.62	1469.36
76.4556	4475.61	1467.76
76.4883	4472.45	1469.04
76.5209	4469.38	1466.71
76.5535	4469.75	1469.41
76.5862	4466.38	1467.99
76.6188	4460.57	1465.72
76.6514	4457.76	1463.99
76.6841	4452.82	1462.26
76.7167	4449.26	1463.16
76.7493	4449.56	1464.48
76.782	4443.5	1460.49
76.8146	4443.21	1454.42
76.8473	4438.68	1460.09
76.8799	4437.05	1457.82
76.9125	4432.68	1459.2
76.9452	4433.27	1457.57
76.9778	4427.81	1455.41
77.0104	4425.15	1451.29
77.0431	4420.31	1454.78
77.0757	4417.74	1453.54
77.1084	4411.69	1448.76
77.141	4413.68	1449.21
77.1736	4403.92	1452.55
77.2063	4403.31	1449.77
77.2389	4402.58	1448.51
77.2715	4398.64	1449.11
77.3042	4394.5	1446.98
77.3368	4393	1442.33
77.3695	4392.82	1441.82
77.4021	4391.15	1441.88
77.4347	4388.52	1442.18
77.4674	4385.2	1438.73
77.5	4380.16	1437.07
77.5326	4379.45	1437.77
77.5653	4376.94	1432.71
77.5979	4375.2	1437.51
77.6305	4371	1434.08
77.6632	4366.53	1433.66
77.6958	4362.69	1431.74
77.7285	4363.24	1432.29
77.7611	4362.51	1430.58
77.7937	4353.36	1429.93
77.8264	4351.02	1426.23
77.859	4346.54	1428.01
77.8916	4345.25	1430.42
77.9243	4346.77	1426.4
77.9569	4349.86	1424.31
77.9896	4342.81	1426.74
78.0222	4340.75	1425.27
78.0548	4330.33	1419.03
78.0875	4323.9	1418.78
78.1201	4324.84	1419.08
78.1527	4324.65	1417.26
78.1854	4326.12	1416.6
78.218	4322.13	1417.05
78.2507	4314.28	1416.28
78.2833	4310.3	1414.81
78.3159	4305.95	1413.56
78.3486	4301.83	1415.97
78.3812	4305.43	1412.73
78.4138	4300.38	1410.73
78.4465	4292.71	1411.64
78.4791	4294.05	1411.15
78.5117	4291.99	1410.07
78.5444	4290.71	1409.45
78.577	4288.79	1407.66
78.6097	4288.69	1406.84
78.6423	4283.14	1406.02
78.6749	4280.1	1403.05
78.7076	4277.53	1399.97
78.7402	4271.17	1406.31
78.7728	4274.02	1406.01
78.8055	4267.92	1402.16
78.8381	4271.09	1401.65
78.8708	4257.87	1398.37
78.9034	4260.55	1399.37
78.936	4255.65	1399.55
78.9687	4255.36	1399.85
79.0013	4253.69	1396.08
79.0339	4252.49	1395.43
79.0666	4245.81	1397.56
79.0992	4245.16	1396.16
79.1319	4240.82	1396.37
79.1645	4239.38	1393.81
79.1971	4226.18	1391.04
79.2298	4230.31	1391.74
79.2624	4232.02	1391.52
79.295	4226.7	1391.07
79.3277	4226.28	1391.9
79.3603	4223.16	1391.59
79.393	4213.95	1390.51
79.4256	4208.53	1386.51
79.4582	4205.29	1385.19
79.4909	4208.05	1386.16
79.5235	4204.47	1382.43
79.5561	4207.64	1383.74
79.5888	4200.25	1381.89
79.6214	4196.78	1381.36
79.654	4193.84	1382.49
79.6867	4191.42	1381.3
79.7193	4191.52	1378.28
79.752	4182.74	1377.8
79.7846	4177.02	1377.61
79.8172	4184	1379.24
79.8499	4180.49	1378.67
79.8825	4174.43	1374.51
79.9151	4167.78	1372.31
79.9478	4165.36	1373.13
79.9804	4167.37	1372.03
80.0131	4166.22	1373.12
80.0457	4162.52	1372.69
80.0783	4154.76	1372.78
80.111	4155.42	1370.43
80.1436	4149.64	1367.57
80.1762	4146.4	1365.21
[truncated: 301 more rows]

## Sheet: Fig1-S1A-350 nm(1st derivative)
	First derivative of fluorescence counts at 350 nm
Temperature, °C	VPS34-CII WT	mCherry-VPS34-CII WT
15	-172.455	-33.0292
15.0326	-171.99	-33.1696
15.0653	-171.525	-33.3102
15.0979	-171.062	-33.451
15.1305	-170.599	-33.5921
15.1632	-170.138	-33.7333
15.1958	-169.678	-33.8747
15.2285	-169.219	-34.0163
15.2611	-168.762	-34.1581
15.2937	-168.306	-34.3001
15.3264	-167.851	-34.4423
15.359	-167.397	-34.5846
15.3916	-166.945	-34.7272
15.4243	-166.494	-34.8698
15.4569	-166.045	-35.0127
15.4896	-165.597	-35.1556
15.5222	-165.15	-35.2988
15.5548	-164.705	-35.442
15.5875	-164.262	-35.5854
15.6201	-163.82	-35.7289
15.6527	-163.38	-35.8725
15.6854	-162.941	-36.0162
15.718	-162.504	-36.16
15.7507	-162.068	-36.3039
15.7833	-161.634	-36.4478
15.8159	-161.202	-36.5918
15.8486	-160.771	-36.7359
15.8812	-160.342	-36.88
15.9138	-159.914	-37.0241
15.9465	-159.488	-37.1682
15.9791	-159.064	-37.3124
16.0117	-158.641	-37.4565
16.0444	-158.22	-37.6007
16.077	-157.8	-37.7448
16.1097	-157.382	-37.8889
16.1423	-156.965	-38.033
16.1749	-156.549	-38.177
16.2076	-156.135	-38.321
16.2402	-155.723	-38.4649
16.2728	-155.311	-38.6087
16.3055	-154.901	-38.7525
16.3381	-154.492	-38.8962
16.3708	-154.084	-39.0397
16.4034	-153.678	-39.1832
16.436	-153.272	-39.3266
16.4687	-152.867	-39.4699
16.5013	-152.464	-39.613
16.5339	-152.061	-39.756
16.5666	-151.659	-39.8989
16.5992	-151.257	-40.0416
16.6319	-150.857	-40.1843
16.6645	-150.456	-40.3267
16.6971	-150.057	-40.4691
16.7298	-149.658	-40.6113
16.7624	-149.259	-40.7533
16.795	-148.86	-40.8953
16.8277	-148.462	-41.0371
16.8603	-148.064	-41.1788
16.893	-147.665	-41.3204
16.9256	-147.267	-41.462
16.9582	-146.868	-41.6034
16.9909	-146.469	-41.7448
17.0235	-146.07	-41.8862
17.0561	-145.67	-42.0276
17.0888	-145.269	-42.169
17.1214	-144.868	-42.3106
17.154	-144.465	-42.4522
17.1867	-144.061	-42.594
17.2193	-143.656	-42.7361
17.252	-143.25	-42.8785
17.2846	-142.843	-43.0213
17.3172	-142.434	-43.1647
17.3499	-142.024	-43.3087
17.3825	-141.614	-43.4537
17.4151	-141.203	-43.5997
17.4478	-140.792	-43.7469
17.4804	-140.382	-43.8957
17.5131	-139.975	-44.0462
17.5457	-139.572	-44.1988
17.5783	-139.18	-44.3528
17.611	-138.891	-44.4953
17.6436	-138.608	-44.6364
17.6762	-138.331	-44.7759
17.7089	-138.061	-44.9138
17.7415	-137.796	-45.0497
17.7742	-137.538	-45.1836
17.8068	-137.286	-45.3153
17.8394	-137.041	-45.4446
17.8721	-136.802	-45.5714
17.9047	-136.569	-45.6956
17.9373	-136.343	-45.8169
17.97	-136.123	-45.9353
18.0026	-135.909	-46.0506
18.0352	-135.701	-46.1627
18.0679	-135.499	-46.2716
18.1005	-135.302	-46.3771
18.1332	-135.111	-46.4793
18.1658	-134.926	-46.5779
18.1984	-134.746	-46.673
18.2311	-134.571	-46.7646
18.2637	-134.4	-46.8526
18.2963	-134.234	-46.9371
18.329	-134.072	-47.018
18.3616	-133.913	-47.0954
18.3943	-133.758	-47.1695
18.4269	-133.606	-47.2401
18.4595	-133.456	-47.3075
18.4922	-133.309	-47.3716
18.5248	-133.164	-47.4326
18.5574	-133.02	-47.4906
18.5901	-132.877	-47.5457
18.6227	-132.736	-47.598
18.6554	-132.595	-47.6476
18.688	-132.454	-47.6946
18.7206	-132.314	-47.7392
18.7533	-132.174	-47.7815
18.7859	-132.034	-47.8217
18.8185	-131.893	-47.8599
18.8512	-131.752	-47.8961
18.8838	-131.61	-47.9306
18.9164	-131.468	-47.9635
18.9491	-131.324	-47.9949
18.9817	-131.18	-48.025
19.0144	-131.036	-48.0539
19.047	-130.89	-48.0817
19.0796	-130.743	-48.1085
19.1123	-130.596	-48.1345
19.1449	-130.447	-48.1598
19.1775	-130.298	-48.1845
19.2102	-130.148	-48.2087
19.2428	-129.997	-48.2324
19.2755	-129.845	-48.2557
19.3081	-129.692	-48.2787
19.3407	-129.538	-48.3014
19.3734	-129.383	-48.3237
19.406	-129.228	-48.3458
19.4386	-129.071	-48.3676
19.4713	-128.914	-48.3891
19.5039	-128.756	-48.4103
19.5366	-128.597	-48.4311
19.5692	-128.438	-48.4515
19.6018	-128.277	-48.4714
19.6345	-128.117	-48.4908
19.6671	-127.955	-48.5095
19.6997	-127.793	-48.5276
19.7324	-127.631	-48.5448
19.765	-127.468	-48.5611
19.7977	-127.305	-48.5764
19.8303	-127.141	-48.5906
19.8629	-126.977	-48.6035
19.8956	-126.813	-48.6152
19.9282	-126.648	-48.6254
19.9608	-126.484	-48.6342
19.9935	-126.319	-48.6413
20.0261	-126.155	-48.6469
20.0587	-125.99	-48.6506
20.0914	-125.826	-48.6526
20.124	-125.662	-48.6528
20.1567	-125.498	-48.651
20.1893	-125.335	-48.6472
20.2219	-125.172	-48.6415
20.2546	-125.009	-48.6338
20.2872	-124.848	-48.6242
20.3198	-124.687	-48.6125
20.3525	-124.526	-48.5989
20.3851	-124.367	-48.5835
20.4178	-124.209	-48.5662
20.4504	-124.051	-48.5472
20.483	-123.895	-48.5265
20.5157	-123.74	-48.5043
20.5483	-123.586	-48.4806
20.5809	-123.433	-48.4555
20.6136	-123.281	-48.4293
20.6462	-123.131	-48.402
20.6789	-122.983	-48.3738
20.7115	-122.835	-48.3449
20.7441	-122.689	-48.3153
20.7768	-122.545	-48.2854
20.8094	-122.402	-48.2553
20.842	-122.26	-48.2251
20.8747	-122.12	-48.1951
20.9073	-121.981	-48.1655
20.9399	-121.844	-48.1365
20.9726	-121.709	-48.1082
21.0052	-121.574	-48.0808
21.0379	-121.442	-48.0546
21.0705	-121.31	-48.0296
21.1031	-121.18	-48.0061
21.1358	-121.052	-47.9842
21.1684	-120.925	-47.9641
21.201	-120.799	-47.9459
21.2337	-120.675	-47.9296
21.2663	-120.551	-47.9154
21.299	-120.429	-47.9034
21.3316	-120.309	-47.8936
21.3642	-120.189	-47.886
21.3969	-120.071	-47.8807
21.4295	-119.953	-47.8777
21.4621	-119.837	-47.8769
21.4948	-119.722	-47.8783
21.5274	-119.607	-47.8818
21.5601	-119.494	-47.8875
21.5927	-119.381	-47.8951
21.6253	-119.27	-47.9045
21.658	-119.159	-47.9157
21.6906	-119.049	-47.9285
21.7232	-118.939	-47.9427
21.7559	-118.831	-47.9582
21.7885	-118.722	-47.9747
21.8211	-118.614	-47.9922
21.8538	-118.507	-48.0103
21.8864	-118.399	-48.029
21.9191	-118.292	-48.048
21.9517	-118.185	-48.0671
21.9843	-118.078	-48.0862
22.017	-117.97	-48.105
22.0496	-117.863	-48.1234
22.0822	-117.755	-48.1411
22.1149	-117.646	-48.158
22.1475	-117.538	-48.1739
22.1802	-117.428	-48.1887
22.2128	-117.318	-48.2021
22.2454	-117.208	-48.2141
22.2781	-117.097	-48.2245
22.3107	-116.985	-48.2332
22.3433	-116.872	-48.2402
22.376	-116.759	-48.2452
22.4086	-116.645	-48.2483
22.4413	-116.53	-48.2494
22.4739	-116.415	-48.2485
22.5065	-116.299	-48.2455
22.5392	-116.182	-48.2404
22.5718	-116.065	-48.2333
22.6044	-115.947	-48.2241
22.6371	-115.828	-48.2129
22.6697	-115.709	-48.1997
22.7023	-115.589	-48.1846
22.735	-115.469	-48.1676
22.7676	-115.348	-48.1488
22.8003	-115.227	-48.1284
22.8329	-115.105	-48.1064
22.8655	-114.983	-48.0829
22.8982	-114.86	-48.0581
22.9308	-114.737	-48.032
22.9634	-114.614	-48.0048
22.9961	-114.49	-47.9765
23.0287	-114.365	-47.9474
23.0614	-114.241	-47.9175
23.094	-114.115	-47.8869
23.1266	-113.989	-47.8558
23.1593	-113.863	-47.8242
23.1919	-113.736	-47.7923
23.2245	-113.609	-47.76
23.2572	-113.481	-47.7276
23.2898	-113.353	-47.6952
23.3225	-113.224	-47.6627
23.3551	-113.095	-47.6302
23.3877	-112.965	-47.5979
23.4204	-112.835	-47.5659
23.453	-112.704	-47.534
23.4856	-112.573	-47.5025
23.5183	-112.441	-47.4714
23.5509	-112.309	-47.4407
23.5836	-112.177	-47.4105
23.6162	-112.044	-47.3807
23.6488	-111.911	-47.3515
23.6815	-111.778	-47.3228
23.7141	-111.644	-47.2947
23.7467	-111.51	-47.2672
23.7794	-111.376	-47.2402
23.812	-111.242	-47.2138
23.8446	-111.108	-47.188
23.8773	-110.974	-47.1627
23.9099	-110.839	-47.1378
23.9426	-110.705	-47.1134
23.9752	-110.571	-47.0895
24.0078	-110.437	-47.0658
24.0405	-110.304	-47.0425
24.0731	-110.17	-47.0193
24.1057	-110.037	-46.9962
24.1384	-109.905	-46.9733
24.171	-109.773	-46.9502
24.2037	-109.641	-46.927
24.2363	-109.51	-46.9036
24.2689	-109.38	-46.8799
24.3016	-109.251	-46.8558
24.3342	-109.122	-46.8313
24.3668	-108.994	-46.8062
24.3995	-108.867	-46.7806
24.4321	-108.741	-46.7542
24.4648	-108.616	-46.7272
24.4974	-108.493	-46.6995
24.53	-108.37	-46.6709
24.5627	-108.249	-46.6416
24.5953	-108.129	-46.6114
24.6279	-108.011	-46.5804
24.6606	-107.894	-46.5484
24.6932	-107.779	-46.5157
24.7258	-107.665	-46.482
24.7585	-107.553	-46.4475
24.7911	-107.443	-46.4121
24.8238	-107.335	-46.3759
24.8564	-107.228	-46.3388
24.889	-107.124	-46.301
24.9217	-107.021	-46.2623
24.9543	-106.921	-46.2228
24.9869	-106.822	-46.1825
25.0196	-106.726	-46.1414
25.0522	-106.631	-46.0995
25.0849	-106.539	-46.0568
25.1175	-106.448	-46.0134
25.1501	-106.36	-45.9691
25.1828	-106.273	-45.9241
25.2154	-106.189	-45.8783
25.248	-106.106	-45.8317
25.2807	-106.026	-45.7844
25.3133	-105.947	-45.7363
25.346	-105.87	-45.6875
25.3786	-105.795	-45.6379
25.4112	-105.721	-45.5877
25.4439	-105.649	-45.5368
25.4765	-105.579	-45.4853
25.5091	-105.51	-45.4332
25.5418	-105.442	-45.3805
25.5744	-105.375	-45.3274
25.607	-105.31	-45.2738
25.6397	-105.246	-45.2199
25.6723	-105.183	-45.1657
25.705	-105.121	-45.1113
25.7376	-105.059	-45.0567
25.7702	-104.999	-45.0021
25.8029	-104.939	-44.9475
25.8355	-104.88	-44.893
25.8681	-104.822	-44.8387
25.9008	-104.764	-44.7847
25.9334	-104.706	-44.7311
25.9661	-104.648	-44.6779
25.9987	-104.591	-44.6252
26.0313	-104.534	-44.5732
26.064	-104.477	-44.5218
26.0966	-104.42	-44.4712
26.1292	-104.363	-44.4215
26.1619	-104.306	-44.3727
26.1945	-104.249	-44.3248
26.2272	-104.191	-44.2781
26.2598	-104.132	-44.2324
26.2924	-104.073	-44.188
26.3251	-104.013	-44.1449
26.3577	-103.953	-44.1032
26.3903	-103.892	-44.0629
26.423	-103.83	-44.0241
26.4556	-103.767	-43.9868
26.4883	-103.702	-43.9512
26.5209	-103.637	-43.9173
26.5535	-103.57	-43.8851
26.5862	-103.502	-43.8548
26.6188	-103.432	-43.8262
26.6514	-103.361	-43.7995
26.6841	-103.289	-43.7747
26.7167	-103.215	-43.7518
26.7493	-103.139	-43.7308
26.782	-103.061	-43.7118
26.8146	-102.982	-43.6947
26.8473	-102.901	-43.6794
26.8799	-102.818	-43.666
26.9125	-102.734	-43.6545
26.9452	-102.647	-43.6446
26.9778	-102.559	-43.6364
27.0104	-102.469	-43.6297
27.0431	-102.378	-43.6245
27.0757	-102.284	-43.6207
27.1084	-102.189	-43.6181
27.141	-102.093	-43.6165
27.1736	-101.994	-43.616
27.2063	-101.895	-43.6162
27.2389	-101.793	-43.6172
27.2715	-101.691	-43.6186
27.3042	-101.587	-43.6203
27.3368	-101.481	-43.6221
27.3695	-101.375	-43.6239
27.4021	-101.267	-43.6255
27.4347	-101.158	-43.6266
27.4674	-101.049	-43.6271
27.5	-100.938	-43.6267
27.5326	-100.827	-43.6254
27.5653	-100.715	-43.6228
27.5979	-100.602	-43.6188
27.6305	-100.489	-43.6133
27.6632	-100.376	-43.606
27.6958	-100.262	-43.5968
27.7285	-100.148	-43.5856
27.7611	-100.035	-43.5722
27.7937	-99.9212	-43.5565
27.8264	-99.808	-43.5385
27.859	-99.6952	-43.518
27.8916	-99.5829	-43.4949
27.9243	-99.4713	-43.4693
27.9569	-99.3606	-43.441
27.9896	-99.2507	-43.4102
28.0222	-99.142	-43.3767
28.0548	-99.0345	-43.3406
28.0875	-98.9283	-43.3019
28.1201	-98.8235	-43.2606
28.1527	-98.7204	-43.217
28.1854	-98.619	-43.1709
28.218	-98.5194	-43.1226
28.2507	-98.4218	-43.0722
28.2833	-98.3262	-43.0198
28.3159	-98.2329	-42.9654
28.3486	-98.1417	-42.9094
28.3812	-98.053	-42.8518
28.4138	-97.9666	-42.7928
28.4465	-97.8828	-42.7326
28.4791	-97.8016	-42.6713
28.5117	-97.7229	-42.6092
28.5444	-97.647	-42.5465
28.577	-97.5737	-42.4833
28.6097	-97.5032	-42.4198
28.6423	-97.4354	-42.3562
28.6749	-97.3703	-42.2927
28.7076	-97.308	-42.2296
28.7402	-97.2485	-42.1669
28.7728	-97.1918	-42.105
28.8055	-97.1378	-42.0439
28.8381	-97.0864	-41.9838
28.8708	-97.0378	-41.9249
28.9034	-96.9918	-41.8674
28.936	-96.9484	-41.8113
28.9687	-96.9076	-41.7569
29.0013	-96.8692	-41.7042
29.0339	-96.8333	-41.6533
29.0666	-96.7997	-41.6043
29.0992	-96.7684	-41.5573
29.1319	-96.7393	-41.5125
29.1645	-96.7123	-41.4697
29.1971	-96.6874	-41.4292
29.2298	-96.6645	-41.3908
29.2624	-96.6434	-41.3547
29.295	-96.6242	-41.3208
29.3277	-96.6068	-41.2891
29.3603	-96.591	-41.2594
29.393	-96.5768	-41.2319
29.4256	-96.5641	-41.2063
29.4582	-96.5528	-41.1826
29.4909	-96.5429	-41.1607
29.5235	-96.5342	-41.1404
29.5561	-96.5266	-41.1217
29.5888	-96.5201	-41.1045
29.6214	-96.5145	-41.0884
29.654	-96.5098	-41.0736
29.6867	-96.5059	-41.0597
29.7193	-96.5027	-41.0467
29.752	-96.5001	-41.0345
29.7846	-96.498	-41.0228
29.8172	-96.4964	-41.0116
29.8499	-96.4951	-41.0008
29.8825	-96.4942	-40.9903
29.9151	-96.4934	-40.9799
29.9478	-96.4929	-40.9696
29.9804	-96.4924	-40.9593
30.0131	-96.4921	-40.949
30.0457	-96.4917	-40.9385
30.0783	-96.4913	-40.928
30.111	-96.4909	-40.9172
30.1436	-96.4903	-40.9064
30.1762	-96.4896	-40.8954
30.2089	-96.4887	-40.8842
30.2415	-96.4876	-40.873
30.2742	-96.4862	-40.8618
30.3068	-96.4846	-40.8506
30.3394	-96.4826	-40.8395
30.3721	-96.4804	-40.8286
30.4047	-96.4777	-40.8179
30.4373	-96.4747	-40.8077
30.47	-96.4712	-40.7979
30.5026	-96.4673	-40.7887
30.5352	-96.4629	-40.7802
30.5679	-96.4579	-40.7725
30.6005	-96.4524	-40.7658
30.6332	-96.4462	-40.7602
30.6658	-96.4392	-40.7557
30.6984	-96.4315	-40.7526
30.7311	-96.4229	-40.7509
30.7637	-96.4133	-40.7509
30.7963	-96.4026	-40.7525
30.829	-96.3907	-40.756
30.8616	-96.3776	-40.7614
30.8943	-96.363	-40.7689
30.9269	-96.3469	-40.7785
30.9595	-96.3292	-40.7905
30.9922	-96.3097	-40.8048
31.0248	-96.2882	-40.8215
31.0574	-96.2647	-40.8409
31.0901	-96.2391	-40.8628
31.1227	-96.2111	-40.8874
31.1554	-96.1808	-40.9148
31.188	-96.1478	-40.9449
31.2206	-96.1122	-40.9778
31.2533	-96.0738	-41.0135
31.2859	-96.0326	-41.052
31.3185	-95.9883	-41.0932
31.3512	-95.9411	-41.1371
31.3838	-95.8908	-41.1836
31.4164	-95.8373	-41.2326
31.4491	-95.7807	-41.2839
31.4817	-95.7209	-41.3375
31.5144	-95.658	-41.3931
31.547	-95.5919	-41.4507
31.5796	-95.5227	-41.51
31.6123	-95.4503	-41.5709
31.6449	-95.375	-41.6331
31.6775	-95.2966	-41.6965
31.7102	-95.2154	-41.7607
31.7428	-95.1313	-41.8257
31.7755	-95.0444	-41.8911
31.8081	-94.9549	-41.9569
31.8407	-94.8629	-42.0226
31.8734	-94.7685	-42.0881
31.906	-94.6719	-42.1532
31.9386	-94.5731	-42.2177
31.9713	-94.4724	-42.2813
32.0039	-94.3699	-42.3439
32.0366	-94.2659	-42.4051
32.0692	-94.1604	-42.4649
32.1018	-94.0538	-42.523
32.1345	-93.9462	-42.5792
32.1671	-93.8379	-42.6334
32.1997	-93.729	-42.6853
32.2324	-93.6198	-42.7349
32.265	-93.5105	-42.7819
32.2977	-93.4014	-42.8262
32.3303	-93.2927	-42.8678
32.3629	-93.1847	-42.9065
32.3956	-93.0775	-42.9422
32.4282	-92.9714	-42.9748
32.4608	-92.8666	-43.0043
32.4935	-92.7635	-43.0306
32.5261	-92.6621	-43.0537
32.5587	-92.5628	-43.0736
32.5914	-92.4657	-43.0902
32.624	-92.3711	-43.1036
32.6567	-92.279	-43.1138
32.6893	-92.1898	-43.1209
32.7219	-92.1036	-43.1248
32.7546	-92.0204	-43.1257
32.7872	-91.9405	-43.1236
32.8198	-91.8639	-43.1186
32.8525	-91.7908	-43.1108
32.8851	-91.7211	-43.1003
32.9178	-91.6551	-43.0872
32.9504	-91.5926	-43.0716
32.983	-91.5337	-43.0537
33.0157	-91.4783	-43.0335
33.0483	-91.4265	-43.0111
33.0809	-91.3782	-42.9868
33.1136	-91.3332	-42.9606
33.1462	-91.2914	-42.9326
33.1789	-91.2528	-42.903
33.2115	-91.2172	-42.8719
33.2441	-91.1843	-42.8394
33.2768	-91.1541	-42.8056
33.3094	-91.1264	-42.7706
33.342	-91.1009	-42.7345
33.3747	-91.0774	-42.6974
33.4073	-91.0558	-42.6593
33.4399	-91.0358	-42.6204
33.4726	-91.0172	-42.5807
33.5052	-90.9998	-42.5402
33.5379	-90.9833	-42.4991
33.5705	-90.9676	-42.4573
33.6031	-90.9524	-42.4149
33.6358	-90.9377	-42.372
33.6684	-90.923	-42.3287
33.701	-90.9084	-42.2848
33.7337	-90.8936	-42.2405
33.7663	-90.8784	-42.1958
33.799	-90.8627	-42.1508
33.8316	-90.8462	-42.1053
33.8642	-90.829	-42.0596
33.8969	-90.8107	-42.0135
33.9295	-90.7913	-41.9672
33.9621	-90.7707	-41.9206
33.9948	-90.7487	-41.8737
34.0274	-90.7252	-41.8267
34.0601	-90.7002	-41.7794
34.0927	-90.6736	-41.7319
34.1253	-90.6452	-41.6842
34.158	-90.6151	-41.6363
34.1906	-90.5832	-41.5882
34.2232	-90.5496	-41.5399
34.2559	-90.5141	-41.4915
34.2885	-90.4768	-41.4428
34.3211	-90.4378	-41.394
34.3538	-90.3971	-41.3449
34.3864	-90.3548	-41.2957
34.4191	-90.311	-41.2463
34.4517	-90.2658	-41.1967
34.4843	-90.2193	-41.1469
34.517	-90.1717	-41.097
34.5496	-90.1231	-41.047
34.5822	-90.0737	-40.9968
34.6149	-90.0236	-40.9467
34.6475	-89.9731	-40.8965
34.6802	-89.9224	-40.8464
34.7128	-89.8715	-40.7963
34.7454	-89.8208	-40.7465
34.7781	-89.7705	-40.6969
34.8107	-89.7207	-40.6476
34.8433	-89.6717	-40.5986
34.876	-89.6236	-40.5501
34.9086	-89.5767	-40.5022
34.9413	-89.5311	-40.4549
34.9739	-89.487	-40.4082
35.0065	-89.4446	-40.3622
35.0392	-89.4041	-40.3171
35.0718	-89.3656	-40.2729
35.1044	-89.3291	-40.2295
35.1371	-89.2948	-40.1872
35.1697	-89.2629	-40.1459
35.2023	-89.2333	-40.1057
35.235	-89.2061	-40.0666
35.2676	-89.1813	-40.0286
35.3003	-89.1591	-39.9918
35.3329	-89.1392	-39.9562
35.3655	-89.1218	-39.9218
35.3982	-89.1067	-39.8886
35.4308	-89.0939	-39.8567
35.4634	-89.0834	-39.8259
35.4961	-89.0749	-39.7964
35.5287	-89.0684	-39.7681
35.5614	-89.0639	-39.741
35.594	-89.0611	-39.7152
35.6266	-89.06	-39.6906
35.6593	-89.0603	-39.6673
35.6919	-89.0621	-39.6451
35.7245	-89.0651	-39.6242
35.7572	-89.0692	-39.6045
35.7898	-89.0743	-39.5859
35.8225	-89.0801	-39.5685
35.8551	-89.0865	-39.5523
35.8877	-89.0934	-39.5372
35.9204	-89.1006	-39.5233
35.953	-89.1079	-39.5104
35.9856	-89.1152	-39.4985
36.0183	-89.1223	-39.4878
36.0509	-89.1289	-39.478
36.0836	-89.1351	-39.4692
36.1162	-89.1405	-39.4613
36.1488	-89.1451	-39.4544
36.1815	-89.1488	-39.4483
36.2141	-89.1514	-39.4431
36.2467	-89.1528	-39.4388
36.2794	-89.1529	-39.4352
36.312	-89.1517	-39.4324
36.3446	-89.149	-39.4303
36.3773	-89.1448	-39.4289
36.4099	-89.139	-39.4283
36.4426	-89.1317	-39.4284
36.4752	-89.1227	-39.4291
36.5078	-89.112	-39.4306
36.5405	-89.0998	-39.4327
36.5731	-89.0859	-39.4356
36.6057	-89.0705	-39.4393
36.6384	-89.0536	-39.4437
36.671	-89.0353	-39.4489
36.7037	-89.0157	-39.4548
36.7363	-88.9948	-39.4616
36.7689	-88.9728	-39.4692
36.8016	-88.9498	-39.4777
36.8342	-88.9259	-39.487
36.8668	-88.9012	-39.4972
36.8995	-88.8759	-39.5083
36.9321	-88.85	-39.5203
36.9648	-88.8237	-39.5332
36.9974	-88.7971	-39.547
37.03	-88.7704	-39.5617
37.0627	-88.7435	-39.5773
37.0953	-88.7167	-39.5938
37.1279	-88.69	-39.6111
37.1606	-88.6635	-39.6293
37.1932	-88.6374	-39.6484
37.2258	-88.6117	-39.6682
37.2585	-88.5865	-39.6888
37.2911	-88.562	-39.7101
37.3238	-88.5381	-39.7321
37.3564	-88.5149	-39.7547
37.389	-88.4925	-39.7779
37.4217	-88.4709	-39.8016
37.4543	-88.4502	-39.8258
37.4869	-88.4303	-39.8504
37.5196	-88.4114	-39.8754
37.5522	-88.3934	-39.9006
37.5849	-88.3762	-39.9261
37.6175	-88.36	-39.9516
37.6501	-88.3446	-39.9773
37.6828	-88.33	-40.0029
37.7154	-88.3161	-40.0285
37.748	-88.3029	-40.054
37.7807	-88.2903	-40.0792
37.8133	-88.2782	-40.1041
37.846	-88.2664	-40.1287
37.8786	-88.2548	-40.1529
37.9112	-88.2434	-40.1765
37.9439	-88.2318	-40.1996
37.9765	-88.22	-40.222
38.0091	-88.2078	-40.2437
38.0418	-88.1951	-40.2647
38.0744	-88.1817	-40.2847
38.107	-88.1675	-40.3039
38.1397	-88.1523	-40.3221
38.1723	-88.1361	-40.3394
38.205	-88.1186	-40.3555
38.2376	-88.0998	-40.3706
38.2702	-88.0795	-40.3846
38.3029	-88.0577	-40.3975
38.3355	-88.0343	-40.4092
38.3681	-88.0091	-40.4198
38.4008	-87.9822	-40.4294
38.4334	-87.9533	-40.4378
38.4661	-87.9226	-40.4453
38.4987	-87.89	-40.4518
38.5313	-87.8553	-40.4574
38.564	-87.8187	-40.4622
38.5966	-87.7802	-40.4662
38.6292	-87.7397	-40.4695
38.6619	-87.6974	-40.4723
38.6945	-87.6533	-40.4745
38.7272	-87.6074	-40.4763
38.7598	-87.5598	-40.4778
38.7924	-87.5107	-40.479
38.8251	-87.4601	-40.4801
38.8577	-87.4081	-40.4811
38.8903	-87.3549	-40.4822
38.923	-87.3005	-40.4834
38.9556	-87.2451	-40.4848
38.9883	-87.1887	-40.4865
39.0209	-87.1315	-40.4885
39.0535	-87.0735	-40.4911
39.0862	-87.015	-40.4941
39.1188	-86.9559	-40.4978
39.1514	-86.8964	-40.5021
39.1841	-86.8365	-40.507
39.2167	-86.7764	-40.5128
39.2493	-86.7161	-40.5192
39.282	-86.6558	-40.5265
39.3146	-86.5954	-40.5346
39.3473	-86.535	-40.5435
39.3799	-86.4748	-40.5532
39.4125	-86.4148	-40.5637
39.4452	-86.355	-40.5749
39.4778	-86.2956	-40.5869
39.5104	-86.2367	-40.5995
39.5431	-86.1782	-40.6127
39.5757	-86.1204	-40.6265
39.6084	-86.0634	-40.6408
39.641	-86.0072	-40.6554
39.6736	-85.952	-40.6704
39.7063	-85.8979	-40.6856
39.7389	-85.845	-40.701
39.7715	-85.7933	-40.7164
39.8042	-85.743	-40.7319
39.8368	-85.6942	-40.7472
39.8695	-85.6469	-40.7624
39.9021	-85.6011	-40.7773
39.9347	-85.557	-40.7919
39.9674	-85.5144	-40.8061
40	-85.4736	-40.8197
40.0326	-85.4343	-40.8328
40.0653	-85.3968	-40.8453
40.0979	-85.3609	-40.857
40.1305	-85.3266	-40.868
40.1632	-85.294	-40.8782
40.1958	-85.2629	-40.8874
40.2285	-85.2334	-40.8958
40.2611	-85.2053	-40.9031
40.2937	-85.1787	-40.9094
40.3264	-85.1534	-40.9147
40.359	-85.1294	-40.9189
40.3916	-85.1067	-40.9221
40.4243	-85.0851	-40.9241
40.4569	-85.0646	-40.9251
40.4896	-85.0452	-40.925
40.5222	-85.0266	-40.9239
40.5548	-85.009	-40.9219
40.5875	-84.9922	-40.9189
40.6201	-84.9762	-40.9151
40.6527	-84.9609	-40.9104
40.6854	-84.9462	-40.9051
40.718	-84.9322	-40.8992
40.7507	-84.9188	-40.8927
40.7833	-84.906	-40.8859
40.8159	-84.8937	-40.8787
40.8486	-84.882	-40.8713
40.8812	-84.8708	-40.8639
40.9138	-84.8603	-40.8566
40.9465	-84.8502	-40.8495
40.9791	-84.8408	-40.8426
41.0117	-84.8318	-40.8363
41.0444	-84.8235	-40.8305
41.077	-84.8156	-40.8254
41.1097	-84.8082	-40.8212
41.1423	-84.8013	-40.8179
41.1749	-84.7948	-40.8157
41.2076	-84.7885	-40.8147
41.2402	-84.7825	-40.8149
41.2728	-84.7766	-40.8164
41.3055	-84.7706	-40.8195
41.3381	-84.7645	-40.8239
41.3708	-84.7581	-40.83
41.4034	-84.7512	-40.8376
41.436	-84.7436	-40.8468
41.4687	-84.7354	-40.8577
41.5013	-84.7261	-40.8701
41.5339	-84.7158	-40.8841
41.5666	-84.7042	-40.8997
41.5992	-84.6913	-40.9168
41.6319	-84.6768	-40.9353
41.6645	-84.6607	-40.9552
41.6971	-84.6428	-40.9765
41.7298	-84.6231	-40.9989
41.7624	-84.6013	-41.0226
41.795	-84.5775	-41.0473
41.8277	-84.5516	-41.073
41.8603	-84.5234	-41.0997
41.893	-84.4931	-41.1271
41.9256	-84.4604	-41.1553
41.9582	-84.4254	-41.1841
41.9909	-84.3881	-41.2134
42.0235	-84.3484	-41.2432
42.0561	-84.3063	-41.2733
42.0888	-84.2619	-41.3037
42.1214	-84.215	-41.3343
42.154	-84.1657	-41.365
42.1867	-84.114	-41.3957
42.2193	-84.0599	-41.4263
42.252	-84.0033	-41.4567
42.2846	-83.9442	-41.4869
42.3172	-83.8826	-41.5168
42.3499	-83.8184	-41.5463
42.3825	-83.7517	-41.5754
42.4151	-83.6824	-41.6039
42.4478	-83.6104	-41.6318
42.4804	-83.5357	-41.6592
42.5131	-83.4584	-41.6858
42.5457	-83.3784	-41.7118
42.5783	-83.2957	-41.7371
42.611	-83.2103	-41.7616
42.6436	-83.1222	-41.7855
42.6762	-83.0314	-41.8087
42.7089	-82.938	-41.8312
42.7415	-82.8421	-41.853
42.7742	-82.7436	-41.8743
42.8068	-82.6426	-41.8949
42.8394	-82.5393	-41.9151
42.8721	-82.4337	-41.9347
42.9047	-82.3259	-41.954
42.9373	-82.2161	-41.9731
42.97	-82.1044	-41.9919
43.0026	-81.9908	-42.0106
43.0352	-81.8756	-42.0293
43.0679	-81.7589	-42.0482
43.1005	-81.6407	-42.0673
43.1332	-81.5213	-42.0868
43.1658	-81.4006	-42.1067
43.1984	-81.2788	-42.1273
43.2311	-81.156	-42.1486
43.2637	-81.0322	-42.1708
43.2963	-80.9074	-42.1939
43.329	-80.7818	-42.2181
43.3616	-80.6553	-42.2435
43.3943	-80.5279	-42.2701
43.4269	-80.3996	-42.2982
43.4595	-80.2704	-42.3277
43.4922	-80.1403	-42.3588
43.5248	-80.0093	-42.3914
43.5574	-79.8772	-42.4257
43.5901	-79.744	-42.4618
43.6227	-79.6096	-42.4995
43.6554	-79.474	-42.5391
43.688	-79.3369	-42.5804
43.7206	-79.1983	-42.6235
43.7533	-79.0581	-42.6685
43.7859	-78.9161	-42.7152
43.8185	-78.7723	-42.7637
43.8512	-78.6264	-42.814
43.8838	-78.4785	-42.8661
43.9164	-78.3284	-42.9198
43.9491	-78.1761	-42.9752
43.9817	-78.0214	-43.0321
44.0144	-77.8644	-43.0906
44.047	-77.705	-43.1506
44.0796	-77.5432	-43.2119
44.1123	-77.379	-43.2745
44.1449	-77.2124	-43.3384
44.1775	-77.0434	-43.4034
44.2102	-76.8721	-43.4694
44.2428	-76.6985	-43.5365
44.2755	-76.5227	-43.6044
44.3081	-76.3448	-43.6731
44.3407	-76.1647	-43.7426
44.3734	-75.9827	-43.8128
44.406	-75.7988	-43.8835
44.4386	-75.6131	-43.9547
44.4713	-75.4256	-44.0264
44.5039	-75.2365	-44.0985
44.5366	-75.046	-44.1708
44.5692	-74.854	-44.2434
44.6018	-74.6607	-44.3162
44.6345	-74.4661	-44.389
44.6671	-74.2705	-44.4619
44.6997	-74.0739	-44.5347
44.7324	-73.8764	-44.6073
44.765	-73.678	-44.6798
44.7977	-73.479	-44.7519
44.8303	-73.2795	-44.8237
44.8629	-73.0795	-44.8951
44.8956	-72.8792	-44.9659
44.9282	-72.6787	-45.0362
44.9608	-72.4783	-45.1059
44.9935	-72.2779	-45.1749
45.0261	-72.0778	-45.2431
45.0587	-71.8782	-45.3106
45.0914	-71.6791	-45.3773
45.124	-71.4807	-45.4431
45.1567	-71.2831	-45.5081
45.1893	-71.0865	-45.5722
45.2219	-70.8909	-45.6353
45.2546	-70.6965	-45.6976
45.2872	-70.5034	-45.7588
45.3198	-70.3115	-45.8192
45.3525	-70.1211	-45.8785
45.3851	-69.932	-45.937
45.4178	-69.7443	-45.9944
45.4504	-69.5581	-46.0509
45.483	-69.3733	-46.1065
45.5157	-69.1898	-46.1611
45.5483	-69.0076	-46.2148
45.5809	-68.8265	-46.2676
45.6136	-68.6465	-46.3195
45.6462	-68.4673	-46.3705
45.6789	-68.2888	-46.4206
45.7115	-68.1107	-46.4699
45.7441	-67.9328	-46.5183
45.7768	-67.7548	-46.5659
45.8094	-67.5764	-46.6127
45.842	-67.3973	-46.6587
45.8747	-67.2173	-46.7039
45.9073	-67.036	-46.7484
45.9399	-66.853	-46.7921
45.9726	-66.6681	-46.8351
46.0052	-66.481	-46.8773
46.0379	-66.2913	-46.9188
46.0705	-66.0988	-46.9595
46.1031	-65.9032	-46.9994
46.1358	-65.7042	-47.0384
46.1684	-65.5016	-47.0767
46.201	-65.2951	-47.1141
46.2337	-65.0847	-47.1506
46.2663	-64.8699	-47.1862
46.299	-64.6508	-47.2209
46.3316	-64.4271	-47.2547
46.3642	-64.1987	-47.2874
46.3969	-63.9654	-47.3191
46.4295	-63.7272	-47.3498
46.4621	-63.4838	-47.3795
46.4948	-63.2352	-47.408
46.5274	-62.9812	-47.4354
46.5601	-62.7218	-47.4617
46.5927	-62.457	-47.4867
46.6253	-62.1865	-47.5105
46.658	-61.9104	-47.5329
46.6906	-61.6285	-47.5541
46.7232	-61.3408	-47.5738
46.7559	-61.0473	-47.592
46.7885	-60.7479	-47.6087
46.8211	-60.4425	-47.6238
46.8538	-60.1311	-47.6371
46.8864	-59.8136	-47.6488
46.9191	-59.4902	-47.6586
46.9517	-59.1606	-47.6664
46.9843	-58.825	-47.6723
47.017	-58.4833	-47.6761
47.0496	-58.1355	-47.6777
47.0822	-57.7816	-47.6771
47.1149	-57.4216	-47.6741
47.1475	-57.0556	-47.6687
47.1802	-56.6835	-47.6607
47.2128	-56.3053	-47.6501
47.2454	-55.9212	-47.6369
47.2781	-55.531	-47.6208
47.3107	-55.1349	-47.6019
47.3433	-54.7328	-47.5801
47.376	-54.3248	-47.5553
47.4086	-53.9109	-47.5275
47.4413	-53.4912	-47.4965
47.4739	-53.0656	-47.4625
47.5065	-52.6341	-47.4251
47.5392	-52.1968	-47.3846
47.5718	-51.7537	-47.3408
47.6044	-51.3046	-47.2937
47.6371	-50.8496	-47.2433
47.6697	-50.3887	-47.1895
47.7023	-49.9217	-47.1324
47.735	-49.4486	-47.0719
47.7676	-48.9693	-47.0081
47.8003	-48.4837	-46.941
47.8329	-47.9918	-46.8707
47.8655	-47.4933	-46.7971
47.8982	-46.9883	-46.7203
47.9308	-46.4766	-46.6403
47.9634	-45.9581	-46.5573
47.9961	-45.4329	-46.4714
48.0287	-44.9007	-46.3824
48.0614	-44.3616	-46.2907
48.094	-43.8154	-46.1961
48.1266	-43.2622	-46.0989
48.1593	-42.7018	-45.9991
48.1919	-42.1344	-45.8968
48.2245	-41.5598	-45.7921
48.2572	-40.9781	-45.6851
48.2898	-40.3893	-45.5759
48.3225	-39.7935	-45.4646
48.3551	-39.1906	-45.3512
48.3877	-38.5808	-45.236
48.4204	-37.964	-45.119
48.453	-37.3405	-45.0004
48.4856	-36.7103	-44.8802
48.5183	-36.0735	-44.7585
48.5509	-35.4304	-44.6356
48.5836	-34.7811	-44.5115
48.6162	-34.1257	-44.3863
48.6488	-33.4646	-44.2601
48.6815	-32.798	-44.1331
48.7141	-32.1261	-44.0054
48.7467	-31.4493	-43.877
48.7794	-30.7678	-43.7481
48.812	-30.082	-43.6188
48.8446	-29.3923	-43.4891
48.8773	-28.6989	-43.3593
48.9099	-28.0023	-43.2293
48.9426	-27.3028	-43.0993
48.9752	-26.6008	-42.9693
49.0078	-25.8969	-42.8395
49.0405	-25.1913	-42.7098
49.0731	-24.4845	-42.5804
49.1057	-23.7769	-42.4513
49.1384	-23.069	-42.3225
49.171	-22.3611	-42.1941
49.2037	-21.6537	-42.0662
49.2363	-20.9472	-41.9387
49.2689	-20.2419	-41.8117
49.3016	-19.5382	-41.6852
49.3342	-18.8366	-41.5592
49.3668	-18.1372	-41.4338
49.3995	-17.4406	-41.309
49.4321	-16.747	-41.1847
49.4648	-16.0567	-41.061
49.4974	-15.3701	-40.9379
49.53	-14.6875	-40.8153
49.5627	-14.009	-40.6934
49.5953	-13.335	-40.5721
49.6279	-12.6658	-40.4514
49.6606	-12.0015	-40.3313
49.6932	-11.3423	-40.2119
49.7258	-10.6885	-40.0931
49.7585	-10.0402	-39.975
49.7911	-9.39754	-39.8575
49.8238	-8.7607	-39.7407
49.8564	-8.12978	-39.6247
49.889	-7.50487	-39.5094
49.9217	-6.88606	-39.3949
49.9543	-6.2734	-39.2813
49.9869	-5.66693	-39.1686
50.0196	-5.06668	-39.0568
50.0522	-4.47263	-38.9459
50.0849	-3.8848	-38.8362
50.1175	-3.30314	-38.7275
50.1501	-2.72764	-38.6201
50.1828	-2.15823	-38.5139
50.2154	-1.59485	-38.409
50.248	-1.03746	-38.3055
50.2807	-0.485964	-38.2035
50.3133	0.0597087	-38.103
50.346	0.599644	-38.0042
50.3786	1.13393	-37.9071
50.4112	1.66264	-37.8118
50.4439	2.18589	-37.7183
50.4765	2.70373	-37.6268
50.5091	3.21625	-37.5374
50.5418	3.72351	-37.45
50.5744	4.22558	-37.3649
50.607	4.72252	-37.282
50.6397	5.21437	-37.2014
50.6723	5.70118	-37.1232
50.705	6.18298	-37.0475
50.7376	6.65981	-36.9742
50.7702	7.13168	-36.9035
50.8029	7.59864	-36.8353
50.8355	8.06067	-36.7698
50.8681	8.5178	-36.7069
50.9008	8.97003	-36.6467
50.9334	9.41735	-36.5891
50.9661	9.85979	-36.5342
50.9987	10.2973	-36.482
51.0313	10.7299	-36.4324
51.064	11.1575	-36.3853
51.0966	11.5802	-36.3409
51.1292	11.9979	-36.2989
51.1619	12.4105	-36.2594
51.1945	12.8182	-36.2222
51.2272	13.2208	-36.1874
51.2598	13.6184	-36.1548
51.2924	14.011	-36.1243
51.3251	14.3985	-36.0958
51.3577	14.781	-36.0693
51.3903	15.1585	-36.0446
51.423	15.5309	-36.0217
51.4556	15.8984	-36.0002
51.4883	16.261	-35.9803
51.5209	16.6186	-35.9616
51.5535	16.9713	-35.9441
51.5862	17.3192	-35.9276
51.6188	17.6623	-35.9121
51.6514	18.0007	-35.8973
51.6841	18.3344	-35.8832
51.7167	18.6636	-35.8696
51.7493	18.9882	-35.8563
51.782	19.3084	-35.8433
51.8146	19.6243	-35.8304
51.8473	19.936	-35.8175
51.8799	20.2436	-35.8045
51.9125	20.5472	-35.7912
51.9452	20.847	-35.7776
51.9778	21.143	-35.7636
52.0104	21.4355	-35.7491
52.0431	21.7245	-35.7339
52.0757	22.0103	-35.7181
52.1084	22.2929	-35.7016
52.141	22.5727	-35.6844
52.1736	22.8496	-35.6663
52.2063	23.124	-35.6474
52.2389	23.3959	-35.6277
52.2715	23.6656	-35.6071
52.3042	23.9331	-35.5857
52.3368	24.1988	-35.5634
52.3695	24.4627	-35.5404
52.4021	24.725	-35.5165
52.4347	24.9858	-35.4919
52.4674	25.2454	-35.4665
52.5	25.5039	-35.4405
52.5326	25.7614	-35.4138
52.5653	26.0181	-35.3864
52.5979	26.274	-35.3586
52.6305	26.5294	-35.3302
52.6632	26.7843	-35.3014
52.6958	27.0389	-35.2722
52.7285	27.2933	-35.2428
52.7611	27.5475	-35.213
52.7937	27.8018	-35.1831
52.8264	28.0562	-35.153
52.859	28.3107	-35.1229
52.8916	28.5656	-35.0928
52.9243	28.821	-35.0627
52.9569	29.0768	-35.0326
52.9896	29.3333	-35.0027
53.0222	29.5906	-34.9729
53.0548	29.8487	-34.9433
53.0875	30.1078	-34.9138
53.1201	30.3679	-34.8846
53.1527	30.6292	-34.8556
53.1854	30.8917	-34.8268
53.218	31.1555	-34.7982
53.2507	31.4207	-34.7699
53.2833	31.6873	-34.7418
53.3159	31.9554	-34.7139
53.3486	32.225	-34.6862
53.3812	32.4961	-34.6586
53.4138	32.7687	-34.6312
53.4465	33.043	-34.6039
53.4791	33.3187	-34.5765
53.5117	33.596	-34.5492
53.5444	33.8748	-34.5218
53.577	34.1551	-34.4943
53.6097	34.4369	-34.4667
53.6423	34.7201	-34.4388
53.6749	35.0047	-34.4106
53.7076	35.2907	-34.3822
53.7402	35.578	-34.3533
53.7728	35.8667	-34.3241
53.8055	36.1566	-34.2943
53.8381	36.4478	-34.2641
53.8708	36.7401	-34.2333
53.9034	37.0336	-34.2019
53.936	37.3282	-34.1699
53.9687	37.6238	-34.1372
54.0013	37.9205	-34.1039
54.0339	38.2181	-34.0699
54.0666	38.5167	-34.0353
54.0992	38.8161	-33.9999
54.1319	39.1163	-33.964
54.1645	39.4173	-33.9274
54.1971	39.7189	-33.8903
54.2298	40.0211	-33.8525
54.2624	40.3238	-33.8143
54.295	40.6269	-33.7756
54.3277	40.9303	-33.7365
54.3603	41.234	-33.697
54.393	41.5377	-33.6572
54.4256	41.8414	-33.6171
54.4582	42.1449	-33.5768
54.4909	42.4483	-33.5363
54.5235	42.7513	-33.4957
54.5561	43.0538	-33.4551
54.5888	43.3559	-33.4145
54.6214	43.6572	-33.3741
54.654	43.9579	-33.3338
54.6867	44.2578	-33.2938
54.7193	44.5568	-33.2542
54.752	44.8548	-33.215
54.7846	45.1517	-33.1764
54.8172	45.4476	-33.1384
54.8499	45.7423	-33.1011
54.8825	46.0358	-33.0645
54.9151	46.328	-33.0289
54.9478	46.6189	-32.9941
54.9804	46.9084	-32.9604
55.0131	47.1966	-32.9278
55.0457	47.4834	-32.8963
55.0783	47.7688	-32.866
55.111	48.0528	-32.837
55.1436	48.3355	-32.8092
55.1762	48.6168	-32.7828
55.2089	48.8968	-32.7577
55.2415	49.1756	-32.7339
55.2742	49.4531	-32.7116
55.3068	49.7295	-32.6905
55.3394	50.0047	-32.6709
55.3721	50.2788	-32.6525
55.4047	50.5519	-32.6355
55.4373	50.8241	-32.6197
55.47	51.0952	-32.6051
55.5026	51.3654	-32.5917
55.5352	51.6348	-32.5794
55.5679	51.9032	-32.5682
55.6005	52.1708	-32.5579
55.6332	52.4375	-32.5485
55.6658	52.7034	-32.54
55.6984	52.9684	-32.5322
55.7311	53.2325	-32.525
55.7637	53.4956	-32.5185
55.7963	53.7577	-32.5124
55.829	54.0188	-32.5068
55.8616	54.2787	-32.5015
55.8943	54.5374	-32.4965
55.9269	54.7948	-32.4917
55.9595	55.0509	-32.487
55.9922	55.3055	-32.4824
56.0248	55.5584	-32.4779
56.0574	55.8097	-32.4733
56.0901	56.0592	-32.4687
56.1227	56.3068	-32.4641
56.1554	56.5523	-32.4593
56.188	56.7956	-32.4544
56.2206	57.0365	-32.4494
56.2533	57.275	-32.4443
56.2859	57.5108	-32.439
56.3185	57.7438	-32.4336
56.3512	57.9738	-32.4281
56.3838	58.2005	-32.4224
56.4164	58.4239	-32.4166
56.4491	58.6436	-32.4106
56.4817	58.8595	-32.4046
56.5144	59.0714	-32.3985
56.547	59.279	-32.3923
56.5796	59.4821	-32.3861
56.6123	59.6806	-32.3799
56.6449	59.8741	-32.3737
56.6775	60.0626	-32.3675
56.7102	60.2458	-32.3614
56.7428	60.4234	-32.3553
56.7755	60.5954	-32.3494
56.8081	60.7615	-32.3437
56.8407	60.9216	-32.3383
56.8734	61.0755	-32.333
56.906	61.2229	-32.3281
56.9386	61.3638	-32.3236
56.9713	61.4981	-32.3195
57.0039	61.6255	-32.3158
57.0366	61.746	-32.3126
57.0692	61.8594	-32.31
57.1018	61.9656	-32.308
57.1345	62.0646	-32.3067
57.1671	62.1563	-32.306
57.1997	62.2407	-32.306
57.2324	62.3177	-32.3068
57.265	62.3874	-32.3084
57.2977	62.4497	-32.3107
57.3303	62.5046	-32.3138
57.3629	62.5523	-32.3178
57.3956	62.5927	-32.3225
57.4282	62.626	-32.328
57.4608	62.6523	-32.3344
57.4935	62.6716	-32.3415
57.5261	62.684	-32.3493
57.5587	62.6897	-32.3579
57.5914	62.6889	-32.3672
57.624	62.6816	-32.3772
57.6567	62.668	-32.3878
57.6893	62.6482	-32.399
57.7219	62.6225	-32.4107
57.7546	62.5909	-32.423
57.7872	62.5535	-32.4357
57.8198	62.5106	-32.4488
57.8525	62.4622	-32.4624
57.8851	62.4085	-32.4763
57.9178	62.3496	-32.4904
57.9504	62.2856	-32.5049
57.983	62.2165	-32.5195
58.0157	62.1425	-32.5344
58.0483	62.0637	-32.5494
58.0809	61.98	-32.5645
58.1136	61.8917	-32.5798
58.1462	61.7986	-32.5951
58.1789	61.701	-32.6105
58.2115	61.5987	-32.6259
58.2441	61.4918	-32.6413
58.2768	61.3804	-32.6566
58.3094	61.2644	-32.672
58.342	61.1439	-32.6873
58.3747	61.0188	-32.7026
58.4073	60.8892	-32.7178
58.4399	60.7549	-32.7329
58.4726	60.616	-32.7478
58.5052	60.4723	-32.7627
58.5379	60.324	-32.7774
58.5705	60.1708	-32.792
58.6031	60.0128	-32.8064
58.6358	59.8498	-32.8206
58.6684	59.6819	-32.8346
58.701	59.5089	-32.8483
58.7337	59.3308	-32.8617
58.7663	59.1474	-32.8748
58.799	58.9587	-32.8877
58.8316	58.7647	-32.9001
58.8642	58.5652	-32.9122
58.8969	58.36	-32.9239
58.9295	58.1493	-32.9351
58.9621	57.9327	-32.946
58.9948	57.7103	-32.9564
59.0274	57.4818	-32.9663
59.0601	57.2473	-32.9757
59.0927	57.0067	-32.9846
59.1253	56.7597	-32.9931
59.158	56.5064	-33.001
59.1906	56.2467	-33.0083
59.2232	55.9804	-33.0151
59.2559	55.7076	-33.0214
59.2885	55.4282	-33.0271
59.3211	55.142	-33.0322
59.3538	54.8492	-33.0367
59.3864	54.5497	-33.0406
59.4191	54.2434	-33.0439
59.4517	53.9305	-33.0467
59.4843	53.6107	-33.0488
59.517	53.2843	-33.0503
59.5496	52.9512	-33.0513
59.5822	52.6115	-33.0516
59.6149	52.2652	-33.0514
59.6475	51.9125	-33.0505
59.6802	51.5533	-33.049
59.7128	51.1879	-33.047
59.7454	50.8162	-33.0443
59.7781	50.4384	-33.041
59.8107	50.0547	-33.0371
59.8433	49.6651	-33.0327
59.876	49.2699	-33.0276
59.9086	48.869	-33.022
59.9413	48.4628	-33.0157
59.9739	48.0513	-33.0089
60.0065	47.6347	-33.0015
60.0392	47.213	-32.9936
60.0718	46.7866	-32.9851
60.1044	46.3554	-32.9762
60.1371	45.9197	-32.9667
60.1697	45.4795	-32.9568
60.2023	45.035	-32.9465
60.235	44.5863	-32.9358
60.2676	44.1335	-32.9247
60.3003	43.6767	-32.9134
60.3329	43.216	-32.9017
60.3655	42.7515	-32.8898
60.3982	42.2832	-32.8777
60.4308	41.8113	-32.8655
60.4634	41.3357	-32.8532
60.4961	40.8564	-32.8409
60.5287	40.3737	-32.8285
60.5614	39.8874	-32.8161
60.594	39.3976	-32.8039
60.6266	38.9043	-32.7917
60.6593	38.4076	-32.7797
60.6919	37.9074	-32.7679
60.7245	37.4037	-32.7563
60.7572	36.8966	-32.7449
60.7898	36.386	-32.7337
60.8225	35.8719	-32.7229
60.8551	35.3543	-32.7123
60.8877	34.8331	-32.7021
60.9204	34.3083	-32.6921
60.953	33.7798	-32.6825
60.9856	33.2477	-32.6732
61.0183	32.7118	-32.6642
61.0509	32.1721	-32.6554
61.0836	31.6286	-32.6469
61.1162	31.0812	-32.6387
61.1488	30.5298	-32.6307
61.1815	29.9744	-32.6229
61.2141	29.415	-32.6152
61.2467	28.8515	-32.6077
61.2794	28.2839	-32.6002
61.312	27.7122	-32.5928
61.3446	27.1363	-32.5854
61.3773	26.5563	-32.578
61.4099	25.972	-32.5706
61.4426	25.3836	-32.5631
61.4752	24.7909	-32.5555
61.5078	24.194	-32.5478
61.5405	23.5929	-32.54
61.5731	22.9876	-32.5321
61.6057	22.3782	-32.524
61.6384	21.7647	-32.5157
61.671	21.147	-32.5074
61.7037	20.5253	-32.4989
61.7363	19.8997	-32.4902
61.7689	19.2701	-32.4815
61.8016	18.6367	-32.4726
61.8342	17.9997	-32.4636
61.8668	17.359	-32.4545
61.8995	16.7148	-32.4454
61.9321	16.0673	-32.4361
61.9648	15.4167	-32.4269
61.9974	14.7629	-32.4175
62.03	14.1064	-32.4082
62.0627	13.4471	-32.3988
62.0953	12.7854	-32.3894
62.1279	12.1215	-32.3801
62.1606	11.4555	-32.3708
62.1932	10.7877	-32.3615
62.2258	10.1183	-32.3524
62.2585	9.44756	-32.3434
62.2911	8.77563	-32.3345
62.3238	8.10277	-32.3259
62.3564	7.4292	-32.3174
62.389	6.75513	-32.3093
62.4217	6.08076	-32.3015
62.4543	5.4063	-32.2941
62.4869	4.73196	-32.2871
62.5196	4.05791	-32.2805
62.5522	3.38434	-32.2745
62.5849	2.71143	-32.269
62.6175	2.03933	-32.2641
62.6501	1.3682	-32.2598
62.6828	0.698159	-32.2562
62.7154	0.0293533	-32.2533
62.748	-0.638104	-32.2511
62.7807	-1.3041	-32.2496
62.8133	-1.96853	-32.249
62.846	-2.6313	-32.2491
62.8786	-3.29231	-32.2499
62.9112	-3.95147	-32.2516
62.9439	-4.6087	-32.254
62.9765	-5.26394	-32.2572
63.0091	-5.9171	-32.2612
63.0418	-6.56813	-32.2658
63.0744	-7.21695	-32.2712
63.107	-7.86353	-32.2772
63.1397	-8.5078	-32.2838
63.1723	-9.14971	-32.291
63.205	-9.78923	-32.2987
63.2376	-10.4263	-32.3068
63.2702	-11.0609	-32.3154
63.3029	-11.693	-32.3242
63.3355	-12.3227	-32.3334
63.3681	-12.9497	-32.3428
63.4008	-13.5743	-32.3523
63.4334	-14.1963	-32.3619
63.4661	-14.8159	-32.3715
63.4987	-15.4329	-32.3811
63.5313	-16.0474	-32.3906
63.564	-16.6596	-32.3999
63.5966	-17.2693	-32.4089
63.6292	-17.8767	-32.4178
63.6619	-18.4818	-32.4263
63.6945	-19.0846	-32.4345
63.7272	-19.6853	-32.4423
63.7598	-20.2839	-32.4497
63.7924	-20.8804	-32.4567
63.8251	-21.475	-32.4632
63.8577	-22.0676	-32.4693
63.8903	-22.6584	-32.475
63.923	-23.2473	-32.4801
63.9556	-23.8345	-32.4848
63.9883	-24.42	-32.489
64.0209	-25.0038	-32.4926
64.0535	-25.5859	-32.4958
64.0862	-26.1663	-32.4985
64.1188	-26.7451	-32.5007
64.1514	-27.3222	-32.5024
64.1841	-27.8975	-32.5037
64.2167	-28.4711	-32.5045
64.2493	-29.0429	-32.5049
64.282	-29.6129	-32.5049
64.3146	-30.181	-32.5046
64.3473	-30.7472	-32.5039
64.3799	-31.3113	-32.5028
64.4125	-31.8733	-32.5015
64.4452	-32.4331	-32.4999
64.4778	-32.9906	-32.4981
64.5104	-33.5457	-32.4961
64.5431	-34.0983	-32.494
64.5757	-34.6483	-32.4917
64.6084	-35.1956	-32.4893
64.641	-35.7401	-32.4869
64.6736	-36.2818	-32.4845
64.7063	-36.8205	-32.4821
64.7389	-37.356	-32.4798
64.7715	-37.8885	-32.4776
64.8042	-38.4176	-32.4755
64.8368	-38.9434	-32.4737
64.8695	-39.4657	-32.472
64.9021	-39.9844	-32.4706
64.9347	-40.4994	-32.4695
64.9674	-41.0107	-32.4686
65	-41.5181	-32.4681
65.0326	-42.0215	-32.4679
65.0653	-42.5209	-32.468
65.0979	-43.0162	-32.4685
65.1305	-43.5072	-32.4693
65.1632	-43.9939	-32.4705
65.1958	-44.4762	-32.472
65.2285	-44.954	-32.4738
65.2611	-45.4272	-32.476
65.2937	-45.8958	-32.4784
65.3264	-46.3597	-32.4811
65.359	-46.8189	-32.484
65.3916	-47.2732	-32.4871
65.4243	-47.7226	-32.4904
65.4569	-48.167	-32.4938
65.4896	-48.6065	-32.4973
65.5222	-49.0409	-32.5008
65.5548	-49.4702	-32.5043
65.5875	-49.8945	-32.5078
65.6201	-50.3136	-32.5111
65.6527	-50.7277	-32.5142
65.6854	-51.1366	-32.5171
65.718	-51.5405	-32.5196
65.7507	-51.9394	-32.5219
65.7833	-52.3333	-32.5237
65.8159	-52.7222	-32.5251
65.8486	-53.1063	-32.526
65.8812	-53.4856	-32.5263
65.9138	-53.8601	-32.526
65.9465	-54.23	-32.5251
65.9791	-54.5953	-32.5236
66.0117	-54.9561	-32.5213
66.0444	-55.3125	-32.5184
66.077	-55.6645	-32.5147
66.1097	-56.0124	-32.5103
66.1423	-56.3561	-32.5051
66.1749	-56.6958	-32.4992
66.2076	-57.0315	-32.4926
66.2402	-57.3634	-32.4852
66.2728	-57.6915	-32.4771
66.3055	-58.0159	-32.4683
66.3381	-58.3367	-32.4588
66.3708	-58.654	-32.4485
66.4034	-58.9679	-32.4376
66.436	-59.2783	-32.426
66.4687	-59.5854	-32.4138
66.5013	-59.8893	-32.4009
66.5339	-60.1898	-32.3874
66.5666	-60.4871	-32.3733
66.5992	-60.7813	-32.3587
66.6319	-61.0722	-32.3436
66.6645	-61.36	-32.328
66.6971	-61.6446	-32.3119
66.7298	-61.9261	-32.2953
66.7624	-62.2043	-32.2784
66.795	-62.4795	-32.2611
66.8277	-62.7514	-32.2434
66.8603	-63.0202	-32.2255
66.893	-63.2859	-32.2073
66.9256	-63.5483	-32.1888
66.9582	-63.8076	-32.1703
66.9909	-64.0637	-32.1515
67.0235	-64.3167	-32.1327
67.0561	-64.5665	-32.1139
67.0888	-64.8131	-32.0951
67.1214	-65.0565	-32.0762
67.154	-65.2969	-32.0575
67.1867	-65.5341	-32.0389
67.2193	-65.7681	-32.0204
67.252	-65.9991	-32.002
67.2846	-66.2271	-31.9839
67.3172	-66.4519	-31.966
67.3499	-66.6738	-31.9483
67.3825	-66.8927	-31.9309
67.4151	-67.1086	-31.9137
67.4478	-67.3215	-31.8968
67.4804	-67.5316	-31.8803
67.5131	-67.7388	-31.864
67.5457	-67.9432	-31.848
67.5783	-68.1448	-31.8323
67.611	-68.3437	-31.8169
67.6436	-68.5399	-31.8018
67.6762	-68.7335	-31.7869
67.7089	-68.9246	-31.7723
67.7415	-69.1133	-31.7578
67.7742	-69.2995	-31.7436
67.8068	-69.4835	-31.7294
67.8394	-69.6652	-31.7154
67.8721	-69.8449	-31.7014
67.9047	-70.0225	-31.6875
67.9373	-70.1983	-31.6737
67.97	-70.3723	-31.6598
68.0026	-70.5447	-31.646
68.0352	-70.7155	-31.6321
68.0679	-70.8849	-31.6182
68.1005	-71.053	-31.6043
68.1332	-71.2199	-31.5902
68.1658	-71.3858	-31.5761
68.1984	-71.5508	-31.5619
68.2311	-71.7149	-31.5475
68.2637	-71.8783	-31.533
68.2963	-72.0411	-31.5184
68.329	-72.2035	-31.5036
68.3616	-72.3655	-31.4887
68.3943	-72.5273	-31.4736
68.4269	-72.6889	-31.4584
68.4595	-72.8505	-31.4429
68.4922	-73.012	-31.4274
68.5248	-73.1737	-31.4116
68.5574	-73.3355	-31.3957
68.5901	-73.4974	-31.3796
68.6227	-73.6596	-31.3634
68.6554	-73.822	-31.3471
68.688	-73.9847	-31.3305
68.7206	-74.1477	-31.3138
68.7533	-74.3109	-31.297
68.7859	-74.4743	-31.2799
68.8185	-74.638	-31.2627
68.8512	-74.8018	-31.2453
68.8838	-74.9658	-31.2278
68.9164	-75.1299	-31.2101
68.9491	-75.294	-31.1922
68.9817	-75.4581	-31.1742
69.0144	-75.6222	-31.1561
69.047	-75.7861	-31.1378
69.0796	-75.9498	-31.1195
69.1123	-76.1131	-31.1011
69.1449	-76.276	-31.0826
69.1775	-76.4384	-31.064
69.2102	-76.6002	-31.0455
69.2428	-76.7612	-31.0269
69.2755	-76.9213	-31.0083
69.3081	-77.0804	-30.9898
69.3407	-77.2384	-30.9714
69.3734	-77.3951	-30.9531
69.406	-77.5504	-30.935
69.4386	-77.7042	-30.9171
69.4713	-77.8564	-30.8993
69.5039	-78.0068	-30.8819
69.5366	-78.1554	-30.8646
69.5692	-78.3019	-30.8477
69.6018	-78.4463	-30.8311
69.6345	-78.5885	-30.8148
69.6671	-78.7284	-30.7988
69.6997	-78.8658	-30.7832
69.7324	-79.0007	-30.7679
69.765	-79.1329	-30.7529
69.7977	-79.2624	-30.7382
69.8303	-79.3892	-30.7239
69.8629	-79.5131	-30.7099
69.8956	-79.6342	-30.6962
69.9282	-79.7524	-30.6828
69.9608	-79.8677	-30.6697
69.9935	-79.98	-30.6567
70.0261	-80.0894	-30.6441
70.0587	-80.1958	-30.6316
70.0914	-80.2994	-30.6193
70.124	-80.4	-30.6071
70.1567	-80.4979	-30.595
70.1893	-80.593	-30.583
70.2219	-80.6853	-30.571
70.2546	-80.7751	-30.559
70.2872	-80.8622	-30.5469
70.3198	-80.9469	-30.5348
70.3525	-81.0291	-30.5226
70.3851	-81.1091	-30.5102
70.4178	-81.1869	-30.4977
70.4504	-81.2625	-30.4849
70.483	-81.3362	-30.472
70.5157	-81.4079	-30.4587
70.5483	-81.4779	-30.4452
70.5809	-81.5461	-30.4314
70.6136	-81.6128	-30.4173
70.6462	-81.6779	-30.4028
70.6789	-81.7417	-30.388
70.7115	-81.804	-30.3727
70.7441	-81.8652	-30.3571
70.7768	-81.9251	-30.341
70.8094	-81.984	-30.3245
70.842	-82.0418	-30.3076
70.8747	-82.0986	-30.2903
70.9073	-82.1545	-30.2725
70.9399	-82.2095	-30.2544
70.9726	-82.2637	-30.2358
71.0052	-82.3171	-30.2168
71.0379	-82.3698	-30.1974
71.0705	-82.4217	-30.1776
71.1031	-82.4729	-30.1574
71.1358	-82.5234	-30.1369
71.1684	-82.5731	-30.116
71.201	-82.6222	-30.0949
71.2337	-82.6705	-30.0735
71.2663	-82.7181	-30.0519
71.299	-82.7649	-30.0301
71.3316	-82.8109	-30.0081
71.3642	-82.856	-29.9861
71.3969	-82.9003	-29.9641
71.4295	-82.9437	-29.942
71.4621	-82.9861	-29.92
71.4948	-83.0275	-29.8982
71.5274	-83.0679	-29.8765
71.5601	-83.1071	-29.8551
71.5927	-83.1452	-29.8339
71.6253	-83.1821	-29.8131
71.658	-83.2178	-29.7927
71.6906	-83.2521	-29.7727
71.7232	-83.2852	-29.7532
71.7559	-83.3169	-29.7343
71.7885	-83.3472	-29.7159
71.8211	-83.3761	-29.6982
71.8538	-83.4037	-29.6812
71.8864	-83.4297	-29.6649
71.9191	-83.4544	-29.6493
71.9517	-83.4777	-29.6345
71.9843	-83.4995	-29.6204
72.017	-83.5199	-29.6071
72.0496	-83.539	-29.5947
72.0822	-83.5568	-29.583
72.1149	-83.5732	-29.5721
72.1475	-83.5885	-29.562
72.1802	-83.6026	-29.5527
72.2128	-83.6156	-29.5442
72.2454	-83.6277	-29.5364
72.2781	-83.6388	-29.5294
72.3107	-83.6491	-29.523
72.3433	-83.6588	-29.5174
72.376	-83.6679	-29.5123
72.4086	-83.6765	-29.5079
72.4413	-83.6848	-29.5041
72.4739	-83.6928	-29.5008
72.5065	-83.7008	-29.498
72.5392	-83.7088	-29.4957
72.5718	-83.7169	-29.4939
72.6044	-83.7253	-29.4924
72.6371	-83.7341	-29.4913
72.6697	-83.7434	-29.4906
72.7023	-83.7533	-29.4901
72.735	-83.764	-29.4899
72.7676	-83.7755	-29.49
72.8003	-83.7879	-29.4903
72.8329	-83.8014	-29.4908
72.8655	-83.8159	-29.4914
72.8982	-83.8317	-29.4922
72.9308	-83.8487	-29.4931
72.9634	-83.867	-29.4939
72.9961	-83.8867	-29.4948
73.0287	-83.9078	-29.4956
73.0614	-83.9303	-29.4964
73.094	-83.9544	-29.4969
73.1266	-83.9799	-29.4973
73.1593	-84.0069	-29.4974
73.1919	-84.0355	-29.4971
73.2245	-84.0655	-29.4965
73.2572	-84.097	-29.4955
73.2898	-84.13	-29.494
73.3225	-84.1645	-29.4919
73.3551	-84.2003	-29.4893
73.3877	-84.2375	-29.486
73.4204	-84.276	-29.4821
73.453	-84.3157	-29.4774
73.4856	-84.3566	-29.4718
73.5183	-84.3986	-29.4655
73.5509	-84.4416	-29.4582
73.5836	-84.4855	-29.4499
73.6162	-84.5303	-29.4407
73.6488	-84.5758	-29.4305
73.6815	-84.622	-29.4192
73.7141	-84.6688	-29.4068
73.7467	-84.7161	-29.3933
73.7794	-84.7639	-29.3787
73.812	-84.8119	-29.3629
73.8446	-84.8602	-29.346
73.8773	-84.9087	-29.3279
73.9099	-84.9572	-29.3086
73.9426	-85.0057	-29.2881
73.9752	-85.0542	-29.2665
74.0078	-85.1024	-29.2437
74.0405	-85.1504	-29.2197
74.0731	-85.1981	-29.1946
74.1057	-85.2454	-29.1683
74.1384	-85.2923	-29.1409
74.171	-85.3386	-29.1125
74.2037	-85.3844	-29.083
74.2363	-85.4296	-29.0524
74.2689	-85.4742	-29.0209
74.3016	-85.5181	-28.9884
74.3342	-85.5613	-28.955
74.3668	-85.6038	-28.9207
74.3995	-85.6456	-28.8856
74.4321	-85.6867	-28.8496
74.4648	-85.7271	-28.8129
74.4974	-85.7667	-28.7755
74.53	-85.8055	-28.7374
74.5627	-85.8437	-28.6987
74.5953	-85.8811	-28.6595
74.6279	-85.9178	-28.6198
74.6606	-85.9538	-28.5798
74.6932	-85.9892	-28.5394
74.7258	-86.0239	-28.4988
74.7585	-86.0581	-28.458
74.7911	-86.0917	-28.4172
74.8238	-86.1247	-28.3765
74.8564	-86.1573	-28.3358
74.889	-86.1894	-28.2954
74.9217	-86.2211	-28.2553
74.9543	-86.2525	-28.2157
74.9869	-86.2835	-28.1764
75.0196	-86.3142	-28.1378
75.0522	-86.3446	-28.0998
75.0849	-86.3748	-28.0625
75.1175	-86.4049	-28.026
75.1501	-86.4347	-27.9903
75.1828	-86.4644	-27.9555
75.2154	-86.494	-27.9217
75.248	-86.5234	-27.8888
75.2807	-86.5527	-27.857
75.3133	-86.5819	-27.8263
75.346	-86.611	-27.7967
75.3786	-86.6399	-27.7682
75.4112	-86.6687	-27.7408
75.4439	-86.6973	-27.7145
75.4765	-86.7258	-27.6894
75.5091	-86.7542	-27.6655
75.5418	-86.7823	-27.6426
75.5744	-86.8102	-27.6209
75.607	-86.8379	-27.6002
75.6397	-86.8654	-27.5806
75.6723	-86.8925	-27.5621
75.705	-86.9193	-27.5445
75.7376	-86.9458	-27.528
75.7702	-86.9718	-27.5123
75.8029	-86.9974	-27.4976
75.8355	-87.0226	-27.4837
75.8681	-87.0472	-27.4706
75.9008	-87.0713	-27.4583
75.9334	-87.0948	-27.4466
75.9661	-87.1177	-27.4357
75.9987	-87.1399	-27.4253
76.0313	-87.1614	-27.4154
76.064	-87.1822	-27.4061
76.0966	-87.2022	-27.3972
76.1292	-87.2214	-27.3887
76.1619	-87.2398	-27.3805
76.1945	-87.2573	-27.3727
76.2272	-87.274	-27.3651
76.2598	-87.2898	-27.3577
76.2924	-87.3047	-27.3505
76.3251	-87.3187	-27.3435
76.3577	-87.3318	-27.3365
76.3903	-87.3441	-27.3296
76.423	-87.3554	-27.3228
76.4556	-87.3658	-27.316
76.4883	-87.3754	-27.3091
76.5209	-87.384	-27.3023
76.5535	-87.3918	-27.2953
76.5862	-87.3987	-27.2883
76.6188	-87.4048	-27.2813
76.6514	-87.4101	-27.2741
76.6841	-87.4146	-27.2668
76.7167	-87.4183	-27.2595
76.7493	-87.4213	-27.252
76.782	-87.4235	-27.2444
76.8146	-87.4251	-27.2368
76.8473	-87.426	-27.229
76.8799	-87.4264	-27.2212
76.9125	-87.4261	-27.2134
76.9452	-87.4253	-27.2055
76.9778	-87.424	-27.1976
77.0104	-87.4222	-27.1897
77.0431	-87.4201	-27.1819
77.0757	-87.4175	-27.1741
77.1084	-87.4147	-27.1663
77.141	-87.4116	-27.1587
77.1736	-87.4082	-27.1512
77.2063	-87.4046	-27.1438
77.2389	-87.4008	-27.1366
77.2715	-87.3968	-27.1295
77.3042	-87.3926	-27.1225
77.3368	-87.3882	-27.1157
77.3695	-87.3836	-27.109
77.4021	-87.3789	-27.1024
77.4347	-87.3739	-27.0958
77.4674	-87.3688	-27.0894
77.5	-87.3634	-27.0829
77.5326	-87.3577	-27.0765
77.5653	-87.3518	-27.07
77.5979	-87.3457	-27.0634
77.6305	-87.3392	-27.0567
77.6632	-87.3323	-27.0497
77.6958	-87.3251	-27.0425
77.7285	-87.3176	-27.035
77.7611	-87.3096	-27.027
77.7937	-87.3012	-27.0186
77.8264	-87.2923	-27.0096
77.859	-87.283	-27.0001
77.8916	-87.2731	-26.9898
77.9243	-87.2628	-26.9788
77.9569	-87.2519	-26.9669
77.9896	-87.2406	-26.9541
78.0222	-87.2287	-26.9404
78.0548	-87.2162	-26.9255
78.0875	-87.2033	-26.9096
78.1201	-87.1898	-26.8925
78.1527	-87.1758	-26.8741
78.1854	-87.1613	-26.8544
78.218	-87.1462	-26.8333
78.2507	-87.1307	-26.8108
78.2833	-87.1147	-26.7869
78.3159	-87.0982	-26.7614
78.3486	-87.0812	-26.7344
78.3812	-87.0637	-26.7058
78.4138	-87.0458	-26.6756
78.4465	-87.0274	-26.6438
78.4791	-87.0086	-26.6104
78.5117	-86.9893	-26.5754
78.5444	-86.9697	-26.5388
78.577	-86.9496	-26.5006
78.6097	-86.9292	-26.4609
78.6423	-86.9083	-26.4197
78.6749	-86.8872	-26.377
78.7076	-86.8657	-26.3329
78.7402	-86.8438	-26.2874
78.7728	-86.8217	-26.2407
78.8055	-86.7992	-26.1927
78.8381	-86.7765	-26.1436
78.8708	-86.7534	-26.0935
78.9034	-86.7301	-26.0423
78.936	-86.7065	-25.9902
78.9687	-86.6826	-25.9373
79.0013	-86.6585	-25.8837
79.0339	-86.6342	-25.8295
79.0666	-86.6096	-25.7747
79.0992	-86.5848	-25.7195
79.1319	-86.5599	-25.6639
79.1645	-86.5347	-25.6081
79.1971	-86.5094	-25.5521
79.2298	-86.4839	-25.4961
79.2624	-86.4583	-25.4401
79.295	-86.4326	-25.3842
79.3277	-86.4068	-25.3286
79.3603	-86.3809	-25.2732
79.393	-86.355	-25.2183
79.4256	-86.3289	-25.1639
79.4582	-86.3028	-25.11
79.4909	-86.2766	-25.0567
79.5235	-86.2503	-25.0042
79.5561	-86.2239	-24.9524
79.5888	-86.1974	-24.9015
79.6214	-86.1708	-24.8515
79.654	-86.1442	-24.8023
79.6867	-86.1174	-24.7541
79.7193	-86.0904	-24.7069
79.752	-86.0633	-24.6606
79.7846	-86.036	-24.6154
79.8172	-86.0085	-24.5711
79.8499	-85.9808	-24.5279
79.8825	-85.9529	-24.4856
79.9151	-85.9247	-24.4443
79.9478	-85.8962	-24.404
79.9804	-85.8673	-24.3646
80.0131	-85.8382	-24.3261
80.0457	-85.8087	-24.2886
80.0783	-85.7788	-24.2519
80.111	-85.7486	-24.216
80.1436	-85.7179	-24.1809
80.1762	-85.6869	-24.1465
[truncated: 301 more rows]

## Sheet: Fig1-S1A-350nm to 330 nm ratio
	Fluorescence ratio Em350 / Em330
Temperature, °C	VPS34-CII WT	mCherry-VPS34-CII WT
15	0.754955	0.755955
15.0326	0.75477	0.756682
15.0653	0.7551	0.756309
15.0979	0.755412	0.756532
15.1305	0.755212	0.756394
15.1632	0.755469	0.756155
15.1958	0.755022	0.755535
15.2285	0.755044	0.754578
15.2611	0.755923	0.755617
15.2937	0.755747	0.756734
15.3264	0.755569	0.755467
15.359	0.75597	0.756571
15.3916	0.755831	0.756289
15.4243	0.755342	0.75615
15.4569	0.754674	0.75615
15.4896	0.754888	0.756477
15.5222	0.754522	0.757618
15.5548	0.755406	0.756599
15.5875	0.755249	0.756221
15.6201	0.754917	0.754846
15.6527	0.754557	0.756941
15.6854	0.754497	0.755961
15.718	0.755296	0.755764
15.7507	0.754782	0.755787
15.7833	0.75499	0.757509
15.8159	0.75573	0.757691
15.8486	0.754936	0.755326
15.8812	0.755392	0.755394
15.9138	0.755829	0.757282
15.9465	0.755707	0.757313
15.9791	0.755313	0.757242
16.0117	0.755984	0.756726
16.0444	0.755942	0.756336
16.077	0.755275	0.756309
16.1097	0.755733	0.75617
16.1423	0.755269	0.755749
16.1749	0.755864	0.757605
16.2076	0.755804	0.758337
16.2402	0.755493	0.75666
16.2728	0.755364	0.757346
16.3055	0.755265	0.756762
16.3381	0.755432	0.756316
16.3708	0.756287	0.756928
16.4034	0.756173	0.756255
16.436	0.755529	0.755046
16.4687	0.75563	0.755003
16.5013	0.755265	0.757621
16.5339	0.75551	0.756873
16.5666	0.756192	0.756393
16.5992	0.755952	0.756528
16.6319	0.75534	0.756157
16.6645	0.75554	0.757058
16.6971	0.754763	0.756445
16.7298	0.754461	0.757444
16.7624	0.755338	0.757279
16.795	0.755795	0.757879
16.8277	0.756555	0.756906
16.8603	0.755129	0.75705
16.893	0.756251	0.756977
16.9256	0.755865	0.756907
16.9582	0.755462	0.757193
16.9909	0.755415	0.757675
17.0235	0.755997	0.756699
17.0561	0.756561	0.756765
17.0888	0.755908	0.757323
17.1214	0.756048	0.758277
17.154	0.755713	0.757537
17.1867	0.755714	0.757857
17.2193	0.756684	0.757765
17.252	0.756469	0.758966
17.2846	0.755586	0.757206
17.3172	0.756219	0.757829
17.3499	0.756552	0.757569
17.3825	0.756738	0.757357
17.4151	0.756078	0.758362
17.4478	0.756006	0.758171
17.4804	0.756637	0.757615
17.5131	0.756617	0.757826
17.5457	0.757009	0.75842
17.5783	0.756279	0.757942
17.611	0.755062	0.756549
17.6436	0.755313	0.756769
17.6762	0.756703	0.756381
17.7089	0.75649	0.756882
17.7415	0.755551	0.757158
17.7742	0.75543	0.757003
17.8068	0.756416	0.757778
17.8394	0.755808	0.757248
17.8721	0.756516	0.758169
17.9047	0.756772	0.757294
17.9373	0.756625	0.756466
17.97	0.756037	0.757834
18.0026	0.756043	0.758716
18.0352	0.755736	0.757915
18.0679	0.755678	0.757617
18.1005	0.756453	0.757376
18.1332	0.756478	0.757254
18.1658	0.755929	0.757962
18.1984	0.755911	0.758184
18.2311	0.755621	0.758081
18.2637	0.756295	0.757478
18.2963	0.756204	0.757952
18.329	0.756146	0.756862
18.3616	0.756167	0.758418
18.3943	0.755968	0.75916
18.4269	0.756422	0.758447
18.4595	0.755962	0.757561
18.4922	0.756533	0.757929
18.5248	0.756903	0.75811
18.5574	0.757144	0.757821
18.5901	0.75652	0.756666
18.6227	0.756932	0.758647
18.6554	0.757703	0.757329
18.688	0.756292	0.757977
18.7206	0.756034	0.759114
18.7533	0.756313	0.757395
18.7859	0.755166	0.756414
18.8185	0.756779	0.75811
18.8512	0.757001	0.758383
18.8838	0.755278	0.758085
18.9164	0.7549	0.757902
18.9491	0.756339	0.757101
18.9817	0.755599	0.758481
19.0144	0.756321	0.75779
19.047	0.756794	0.757743
19.0796	0.757052	0.75983
19.1123	0.756211	0.760428
19.1449	0.756361	0.758916
19.1775	0.756366	0.758743
19.2102	0.756088	0.759395
19.2428	0.756429	0.758695
19.2755	0.756342	0.758768
19.3081	0.756045	0.758744
19.3407	0.756664	0.757441
19.3734	0.757229	0.7584
19.406	0.756464	0.758376
19.4386	0.756262	0.758384
19.4713	0.755566	0.759669
19.5039	0.75633	0.758143
19.5366	0.756396	0.758565
19.5692	0.756236	0.758509
19.6018	0.756529	0.758792
19.6345	0.756338	0.757613
19.6671	0.756887	0.758991
19.6997	0.756668	0.758644
19.7324	0.756266	0.758903
19.765	0.755579	0.758196
19.7977	0.756098	0.758147
19.8303	0.756504	0.757946
19.8629	0.75561	0.757902
19.8956	0.756561	0.758114
19.9282	0.75597	0.758683
19.9608	0.756408	0.759253
19.9935	0.756642	0.759335
20.0261	0.756865	0.760151
20.0587	0.756431	0.759802
20.0914	0.756635	0.758598
20.124	0.756821	0.758439
20.1567	0.757324	0.758224
20.1893	0.757168	0.75888
20.2219	0.757127	0.759418
20.2546	0.75588	0.757964
20.2872	0.756684	0.758267
20.3198	0.75667	0.759941
20.3525	0.757075	0.758049
20.3851	0.757124	0.75862
20.4178	0.757054	0.759893
20.4504	0.756776	0.758116
20.483	0.756777	0.758822
20.5157	0.757005	0.758799
20.5483	0.756258	0.759088
20.5809	0.755847	0.759588
20.6136	0.756817	0.759155
20.6462	0.757015	0.758233
20.6789	0.757104	0.758549
20.7115	0.757478	0.7603
20.7441	0.757332	0.76073
20.7768	0.757652	0.75922
20.8094	0.757104	0.75943
20.842	0.757727	0.759377
20.8747	0.757607	0.76005
20.9073	0.757097	0.75913
20.9399	0.757236	0.75985
20.9726	0.757187	0.758786
21.0052	0.757603	0.758577
21.0379	0.756285	0.759015
21.0705	0.755925	0.759035
21.1031	0.756795	0.75884
21.1358	0.757002	0.758903
21.1684	0.757042	0.759795
21.201	0.757026	0.758788
21.2337	0.756911	0.759614
21.2663	0.757043	0.759178
21.299	0.757272	0.759674
21.3316	0.757292	0.758995
21.3642	0.756049	0.759151
21.3969	0.756437	0.76017
21.4295	0.756756	0.759954
21.4621	0.756802	0.759433
21.4948	0.757498	0.75936
21.5274	0.756139	0.758448
21.5601	0.757522	0.758196
21.5927	0.757221	0.758694
21.6253	0.756663	0.75878
21.658	0.757272	0.759024
21.6906	0.757344	0.75893
21.7232	0.757069	0.759573
21.7559	0.756285	0.758738
21.7885	0.756722	0.759571
21.8211	0.757522	0.759671
21.8538	0.756851	0.759103
21.8864	0.756504	0.761484
21.9191	0.75734	0.759758
21.9517	0.757978	0.759221
21.9843	0.757078	0.759428
22.017	0.757867	0.758861
22.0496	0.756908	0.75897
22.0822	0.757125	0.759612
22.1149	0.756948	0.759377
22.1475	0.757777	0.759021
22.1802	0.757017	0.759498
22.2128	0.757563	0.760549
22.2454	0.757325	0.760468
22.2781	0.757807	0.759181
22.3107	0.757587	0.759722
22.3433	0.757562	0.759854
22.376	0.757837	0.760064
22.4086	0.757268	0.760039
22.4413	0.757504	0.760664
22.4739	0.756868	0.760249
22.5065	0.757331	0.758557
22.5392	0.757178	0.760213
22.5718	0.756618	0.759533
22.6044	0.757086	0.759692
22.6371	0.757152	0.759695
22.6697	0.758114	0.759124
22.7023	0.757627	0.758831
22.735	0.757578	0.759078
22.7676	0.757584	0.758753
22.8003	0.757853	0.758763
22.8329	0.757072	0.75788
22.8655	0.757	0.760127
22.8982	0.757926	0.760618
22.9308	0.7569	0.760489
22.9634	0.757162	0.759662
22.9961	0.757015	0.759967
23.0287	0.757134	0.759447
23.0614	0.75721	0.760701
23.094	0.757485	0.760743
23.1266	0.757662	0.760709
23.1593	0.756861	0.760385
23.1919	0.757693	0.759124
23.2245	0.756858	0.758777
23.2572	0.757117	0.759574
23.2898	0.758578	0.759429
23.3225	0.7578	0.760367
23.3551	0.757033	0.761375
23.3877	0.757717	0.760256
23.4204	0.757252	0.76053
23.453	0.757066	0.760445
23.4856	0.758053	0.759282
23.5183	0.757861	0.759123
23.5509	0.757099	0.75883
23.5836	0.757702	0.760284
23.6162	0.757864	0.759677
23.6488	0.757754	0.759885
23.6815	0.757265	0.76093
23.7141	0.756876	0.76025
23.7467	0.756912	0.759486
23.7794	0.757765	0.759053
23.812	0.75736	0.759053
23.8446	0.756949	0.760347
23.8773	0.757581	0.76101
23.9099	0.757753	0.760522
23.9426	0.756756	0.760677
23.9752	0.757362	0.759362
24.0078	0.757473	0.759073
24.0405	0.757785	0.759664
24.0731	0.75793	0.760408
24.1057	0.757593	0.761014
24.1384	0.757724	0.760172
24.171	0.757968	0.76036
24.2037	0.75791	0.759804
24.2363	0.756514	0.760602
24.2689	0.757649	0.760829
24.3016	0.75732	0.760733
24.3342	0.75796	0.760049
24.3668	0.757715	0.759637
24.3995	0.757837	0.75933
24.4321	0.75848	0.75988
24.4648	0.758124	0.759483
24.4974	0.75741	0.76071
24.53	0.757864	0.760258
24.5627	0.758136	0.760433
24.5953	0.758522	0.760572
24.6279	0.757897	0.760715
24.6606	0.758137	0.761223
24.6932	0.757993	0.760172
24.7258	0.757673	0.759244
24.7585	0.75796	0.761004
24.7911	0.757342	0.760125
24.8238	0.757174	0.761822
24.8564	0.758631	0.761745
24.889	0.757206	0.758824
24.9217	0.758409	0.759704
24.9543	0.757736	0.760312
24.9869	0.758187	0.760477
25.0196	0.758198	0.759346
25.0522	0.758295	0.759884
25.0849	0.758338	0.761235
25.1175	0.759056	0.760185
25.1501	0.75806	0.759758
25.1828	0.758602	0.760844
25.2154	0.758213	0.761537
25.248	0.758234	0.761324
25.2807	0.757717	0.760325
25.3133	0.757969	0.759595
25.346	0.757743	0.761906
25.3786	0.758118	0.760667
25.4112	0.757033	0.761369
25.4439	0.757642	0.761526
25.4765	0.758203	0.761466
25.5091	0.7586	0.761704
25.5418	0.758457	0.760189
25.5744	0.758106	0.761035
25.607	0.758102	0.760615
25.6397	0.758287	0.760668
25.6723	0.758283	0.761599
25.705	0.758369	0.760126
25.7376	0.758142	0.76096
25.7702	0.75819	0.760462
25.8029	0.758138	0.761174
25.8355	0.758482	0.761009
25.8681	0.758996	0.759957
25.9008	0.758565	0.760513
25.9334	0.757651	0.761788
25.9661	0.758156	0.76161
25.9987	0.758324	0.762059
26.0313	0.758815	0.761749
26.064	0.758489	0.761394
26.0966	0.757914	0.761634
26.1292	0.757676	0.761727
26.1619	0.758231	0.76128
26.1945	0.758312	0.761152
26.2272	0.758288	0.761702
26.2598	0.758694	0.761377
26.2924	0.758563	0.762002
26.3251	0.758696	0.762672
26.3577	0.759176	0.761874
26.3903	0.75858	0.763659
26.423	0.75893	0.76129
26.4556	0.75821	0.761983
26.4883	0.758465	0.761666
26.5209	0.759338	0.760974
26.5535	0.758141	0.761687
26.5862	0.758743	0.761486
26.6188	0.758216	0.762027
26.6514	0.757959	0.760432
26.6841	0.757821	0.76228
26.7167	0.757452	0.762241
26.7493	0.758805	0.76055
26.782	0.759076	0.760979
26.8146	0.759422	0.761224
26.8473	0.759369	0.762046
26.8799	0.759087	0.761405
26.9125	0.759314	0.76167
26.9452	0.758161	0.761512
26.9778	0.758572	0.761473
27.0104	0.758986	0.762553
27.0431	0.758797	0.762817
27.0757	0.758331	0.760114
27.1084	0.758459	0.761679
27.141	0.758424	0.761709
27.1736	0.75839	0.762606
27.2063	0.760583	0.760472
27.2389	0.759542	0.761363
27.2715	0.75867	0.762543
27.3042	0.75862	0.761125
27.3368	0.758336	0.761691
27.3695	0.758574	0.762158
27.4021	0.759391	0.761869
27.4347	0.759596	0.761995
27.4674	0.759097	0.762848
27.5	0.759133	0.762317
27.5326	0.760021	0.762075
27.5653	0.759623	0.76213
27.5979	0.75887	0.76196
27.6305	0.759272	0.761929
27.6632	0.759279	0.761785
27.6958	0.759848	0.762187
27.7285	0.758811	0.762275
27.7611	0.758807	0.762206
27.7937	0.75814	0.761721
27.8264	0.759043	0.761637
27.859	0.759887	0.7625
27.8916	0.758829	0.763014
27.9243	0.759165	0.762944
27.9569	0.758935	0.762564
27.9896	0.759021	0.761753
28.0222	0.758712	0.761389
28.0548	0.758779	0.76247
28.0875	0.759129	0.761266
28.1201	0.759382	0.762064
28.1527	0.759731	0.76246
28.1854	0.758809	0.762183
28.218	0.759623	0.76258
28.2507	0.758083	0.76329
28.2833	0.758871	0.76338
28.3159	0.759363	0.762065
28.3486	0.759099	0.761706
28.3812	0.759564	0.764684
28.4138	0.759065	0.762839
28.4465	0.75867	0.76211
28.4791	0.758707	0.762684
28.5117	0.759687	0.762815
28.5444	0.758993	0.76374
28.577	0.759412	0.763235
28.6097	0.759253	0.762318
28.6423	0.758724	0.7627
28.6749	0.759273	0.762322
28.7076	0.759743	0.762598
28.7402	0.759098	0.763852
28.7728	0.758449	0.764479
28.8055	0.759551	0.7621
28.8381	0.760099	0.762446
28.8708	0.759837	0.763012
28.9034	0.760474	0.762835
28.936	0.759427	0.762479
28.9687	0.759189	0.762647
29.0013	0.758472	0.761619
29.0339	0.759143	0.761666
29.0666	0.759557	0.762183
29.0992	0.759278	0.761444
29.1319	0.760226	0.761886
29.1645	0.759046	0.761781
29.1971	0.759471	0.762381
29.2298	0.759546	0.763281
29.2624	0.75894	0.763405
29.295	0.759192	0.763734
29.3277	0.759601	0.762834
29.3603	0.759347	0.762647
29.393	0.759986	0.763969
29.4256	0.759681	0.763326
29.4582	0.760336	0.762363
29.4909	0.759488	0.763151
29.5235	0.759025	0.76284
29.5561	0.759783	0.76251
29.5888	0.7596	0.76208
29.6214	0.759256	0.763558
29.654	0.759489	0.763253
29.6867	0.759231	0.762375
29.7193	0.759954	0.763182
29.752	0.75992	0.763811
29.7846	0.758713	0.762346
29.8172	0.758878	0.762821
29.8499	0.760003	0.76309
29.8825	0.759935	0.762758
29.9151	0.759558	0.76291
29.9478	0.760068	0.763308
29.9804	0.760697	0.76256
30.0131	0.759891	0.761801
30.0457	0.759631	0.763212
30.0783	0.759373	0.763828
30.111	0.75919	0.763289
30.1436	0.759529	0.762887
30.1762	0.758856	0.763462
30.2089	0.760177	0.762388
30.2415	0.761044	0.762817
30.2742	0.759389	0.762859
30.3068	0.758868	0.763003
30.3394	0.760347	0.762736
30.3721	0.759886	0.764509
30.4047	0.761065	0.762597
30.4373	0.760402	0.762687
30.47	0.759711	0.764009
30.5026	0.758808	0.763884
30.5352	0.760298	0.763311
30.5679	0.759595	0.763699
30.6005	0.759595	0.764153
30.6332	0.759554	0.763908
30.6658	0.759752	0.765581
30.6984	0.759955	0.765077
30.7311	0.759637	0.763383
30.7637	0.759647	0.763814
30.7963	0.760493	0.763254
30.829	0.760008	0.763527
30.8616	0.759339	0.76417
30.8943	0.759957	0.764435
30.9269	0.75937	0.763176
30.9595	0.760123	0.763489
30.9922	0.758934	0.764194
31.0248	0.759548	0.764093
31.0574	0.759743	0.764043
31.0901	0.760045	0.764967
31.1227	0.759928	0.763213
31.1554	0.759782	0.763586
31.188	0.75978	0.762462
31.2206	0.760186	0.763207
31.2533	0.75951	0.762625
31.2859	0.759984	0.763303
31.3185	0.7609	0.764671
31.3512	0.76062	0.764747
31.3838	0.759623	0.764169
31.4164	0.759413	0.764736
31.4491	0.759079	0.764085
31.4817	0.758475	0.765105
31.5144	0.760342	0.763871
31.547	0.760219	0.762919
31.5796	0.759975	0.763835
31.6123	0.75961	0.764276
31.6449	0.760299	0.762664
31.6775	0.760676	0.763459
31.7102	0.759523	0.764513
31.7428	0.759901	0.764623
31.7755	0.759845	0.764907
31.8081	0.760213	0.764448
31.8407	0.760516	0.764204
31.8734	0.76002	0.764122
31.906	0.760627	0.763295
31.9386	0.760916	0.763489
31.9713	0.760266	0.76476
32.0039	0.761103	0.765659
32.0366	0.760476	0.763747
32.0692	0.761173	0.763693
32.1018	0.760576	0.76262
32.1345	0.76074	0.764224
32.1671	0.761623	0.764566
32.1997	0.761042	0.764633
32.2324	0.761245	0.76427
32.265	0.760694	0.763037
32.2977	0.760814	0.765554
32.3303	0.760831	0.765611
32.3629	0.760277	0.764814
32.3956	0.76049	0.764821
32.4282	0.760447	0.765739
32.4608	0.761109	0.765094
32.4935	0.761078	0.762651
32.5261	0.761161	0.763515
32.5587	0.761296	0.764534
32.5914	0.760783	0.764191
32.624	0.761138	0.764651
32.6567	0.761625	0.764681
32.6893	0.761258	0.765545
32.7219	0.76152	0.765018
32.7546	0.762018	0.764898
32.7872	0.760854	0.765653
32.8198	0.759683	0.765962
32.8525	0.761284	0.764985
32.8851	0.761602	0.765031
32.9178	0.761994	0.765417
32.9504	0.761272	0.764254
32.983	0.760942	0.765763
33.0157	0.761635	0.765535
33.0483	0.761232	0.764945
33.0809	0.761631	0.765636
33.1136	0.761254	0.765129
33.1462	0.76165	0.765144
33.1789	0.761125	0.764232
33.2115	0.76153	0.765197
33.2441	0.761329	0.766548
33.2768	0.761441	0.766492
33.3094	0.762163	0.766611
33.342	0.761129	0.767401
33.3747	0.76058	0.766328
33.4073	0.759623	0.76613
33.4399	0.761464	0.76522
33.4726	0.761684	0.764757
33.5052	0.761438	0.765456
33.5379	0.761106	0.765587
33.5705	0.760761	0.764126
33.6031	0.760551	0.764283
33.6358	0.761648	0.765102
33.6684	0.761595	0.765219
33.701	0.761378	0.764444
33.7337	0.760341	0.763452
33.7663	0.761402	0.765229
33.799	0.760969	0.766167
33.8316	0.761398	0.765612
33.8642	0.760737	0.765283
33.8969	0.762036	0.765596
33.9295	0.76156	0.765063
33.9621	0.762148	0.766147
33.9948	0.761911	0.76658
34.0274	0.762288	0.764839
34.0601	0.761905	0.766655
34.0927	0.762669	0.765719
34.1253	0.76181	0.765825
34.158	0.762142	0.765758
34.1906	0.7622	0.764966
34.2232	0.762213	0.766771
34.2559	0.762019	0.767281
34.2885	0.761594	0.766328
34.3211	0.760626	0.766599
34.3538	0.762709	0.765652
34.3864	0.761943	0.766259
34.4191	0.762183	0.766503
34.4517	0.763199	0.766933
34.4843	0.761418	0.767855
34.517	0.76144	0.766952
34.5496	0.761129	0.763833
34.5822	0.761092	0.766315
34.6149	0.762275	0.766401
34.6475	0.76288	0.766394
34.6802	0.761167	0.765614
34.7128	0.762288	0.76617
34.7454	0.762344	0.767687
34.7781	0.763022	0.767345
34.8107	0.761933	0.766381
34.8433	0.762968	0.766352
34.876	0.761051	0.767804
34.9086	0.762449	0.768018
34.9413	0.762515	0.767124
34.9739	0.762923	0.766457
35.0065	0.763353	0.766107
35.0392	0.762307	0.766652
35.0718	0.761197	0.767222
35.1044	0.761504	0.766232
35.1371	0.763038	0.765232
35.1697	0.763985	0.765433
35.2023	0.763282	0.765582
35.235	0.763387	0.767018
35.2676	0.763613	0.766749
35.3003	0.762199	0.765825
35.3329	0.761999	0.766458
35.3655	0.76301	0.76616
35.3982	0.764034	0.766638
35.4308	0.762655	0.767106
35.4634	0.76215	0.767898
35.4961	0.761955	0.766196
35.5287	0.761761	0.767168
35.5614	0.76304	0.766754
35.594	0.762505	0.767125
35.6266	0.762397	0.765112
35.6593	0.76197	0.76397
35.6919	0.762959	0.768008
35.7245	0.762221	0.767517
35.7572	0.762643	0.766805
35.7898	0.762104	0.767378
35.8225	0.763286	0.766475
35.8551	0.763753	0.7684
35.8877	0.763529	0.765965
35.9204	0.763626	0.76632
35.953	0.763123	0.765482
35.9856	0.763411	0.766253
36.0183	0.762537	0.766879
36.0509	0.763226	0.766536
36.0836	0.763995	0.768073
36.1162	0.763405	0.768966
36.1488	0.764557	0.767452
36.1815	0.764237	0.767239
36.2141	0.763767	0.768438
36.2467	0.763723	0.767994
36.2794	0.76257	0.766936
36.312	0.7627	0.76762
36.3446	0.763388	0.767228
36.3773	0.762883	0.767953
36.4099	0.762778	0.768121
36.4426	0.763193	0.767829
36.4752	0.762888	0.766884
36.5078	0.762628	0.767906
36.5405	0.763332	0.767428
36.5731	0.762934	0.767386
36.6057	0.763744	0.767239
36.6384	0.763154	0.767923
36.671	0.763057	0.767369
36.7037	0.76387	0.767636
36.7363	0.763456	0.76771
36.7689	0.763401	0.768729
36.8016	0.762882	0.769595
36.8342	0.763314	0.768425
36.8668	0.763053	0.768453
36.8995	0.763956	0.767808
36.9321	0.76434	0.767518
36.9648	0.763771	0.768081
36.9974	0.764788	0.768578
37.03	0.764198	0.768625
37.0627	0.764393	0.768051
37.0953	0.76493	0.769154
37.1279	0.764395	0.769909
37.1606	0.764344	0.769278
37.1932	0.7641	0.769042
37.2258	0.763805	0.768295
37.2585	0.764328	0.768126
37.2911	0.764144	0.769142
37.3238	0.764129	0.769552
37.3564	0.764177	0.769078
37.389	0.764392	0.768307
37.4217	0.763865	0.76879
37.4543	0.764207	0.767891
37.4869	0.764558	0.768501
37.5196	0.76478	0.769004
37.5522	0.763888	0.769703
37.5849	0.763792	0.76894
37.6175	0.763073	0.768176
37.6501	0.762457	0.767542
37.6828	0.764087	0.768919
37.7154	0.764818	0.768894
37.748	0.764522	0.770467
37.7807	0.763916	0.771258
37.8133	0.764596	0.769248
37.846	0.764036	0.769909
37.8786	0.764338	0.767972
37.9112	0.763717	0.767698
37.9439	0.764444	0.768609
37.9765	0.764739	0.769657
38.0091	0.765331	0.768174
38.0418	0.765297	0.768786
38.0744	0.76498	0.768283
38.107	0.765503	0.767915
38.1397	0.765992	0.770051
38.1723	0.765603	0.770543
38.205	0.765078	0.771185
38.2376	0.764391	0.770319
38.2702	0.765065	0.767818
38.3029	0.765406	0.767582
38.3355	0.764451	0.768932
38.3681	0.764599	0.769991
38.4008	0.764842	0.770844
38.4334	0.764667	0.769576
38.4661	0.76502	0.769262
38.4987	0.764874	0.770651
38.5313	0.76577	0.769117
38.564	0.766089	0.769076
38.5966	0.764686	0.769127
38.6292	0.765392	0.768398
38.6619	0.765541	0.770057
38.6945	0.766437	0.770459
38.7272	0.76636	0.769866
38.7598	0.765798	0.768312
38.7924	0.765402	0.770345
38.8251	0.765188	0.770431
38.8577	0.764374	0.769746
38.8903	0.764504	0.769731
38.923	0.764773	0.771153
38.9556	0.765567	0.771796
38.9883	0.76598	0.769316
39.0209	0.765896	0.768661
39.0535	0.76611	0.769971
39.0862	0.766064	0.769752
39.1188	0.765184	0.770902
39.1514	0.765785	0.772061
39.1841	0.766009	0.773196
39.2167	0.766464	0.771026
39.2493	0.766081	0.770902
39.282	0.765908	0.770962
39.3146	0.765343	0.769721
39.3473	0.766121	0.769987
39.3799	0.765902	0.771918
39.4125	0.766477	0.77134
39.4452	0.767158	0.771079
39.4778	0.766968	0.772014
39.5104	0.766825	0.771097
39.5431	0.767798	0.770952
39.5757	0.765918	0.771665
39.6084	0.766874	0.771021
39.641	0.766188	0.77059
39.6736	0.767304	0.771349
39.7063	0.768306	0.772008
39.7389	0.767206	0.771937
39.7715	0.766814	0.771487
39.8042	0.766923	0.771063
39.8368	0.767018	0.770605
39.8695	0.767439	0.771186
39.9021	0.767524	0.770086
39.9347	0.767637	0.771023
39.9674	0.76775	0.772388
40	0.766377	0.772245
40.0326	0.766602	0.771119
40.0653	0.766337	0.772239
40.0979	0.766494	0.771989
40.1305	0.767249	0.771944
40.1632	0.768532	0.773294
40.1958	0.767784	0.772752
40.2285	0.768242	0.773053
40.2611	0.768275	0.772599
40.2937	0.768572	0.773837
40.3264	0.767288	0.77155
40.359	0.766613	0.771211
40.3916	0.767653	0.772551
40.4243	0.767537	0.773747
40.4569	0.76724	0.772915
40.4896	0.767413	0.772919
40.5222	0.767777	0.773358
40.5548	0.767239	0.773093
40.5875	0.767296	0.774633
40.6201	0.767983	0.773743
40.6527	0.767646	0.772291
40.6854	0.768185	0.772748
40.718	0.767281	0.772747
40.7507	0.767023	0.774138
40.7833	0.769254	0.771703
40.8159	0.768625	0.771901
40.8486	0.767813	0.772952
40.8812	0.76808	0.773627
40.9138	0.767759	0.773849
40.9465	0.767696	0.774189
40.9791	0.769025	0.774444
41.0117	0.769241	0.773634
41.0444	0.767388	0.77232
41.077	0.768104	0.771659
41.1097	0.769149	0.771186
41.1423	0.767767	0.772937
41.1749	0.767472	0.772787
41.2076	0.768847	0.771831
41.2402	0.768559	0.772903
41.2728	0.76806	0.775926
41.3055	0.768851	0.774371
41.3381	0.769207	0.774207
41.3708	0.769482	0.774466
41.4034	0.769913	0.774415
41.436	0.769394	0.776467
41.4687	0.767576	0.775192
41.5013	0.767356	0.776461
41.5339	0.769437	0.773545
41.5666	0.76857	0.7754
41.5992	0.770015	0.774785
41.6319	0.770077	0.775389
41.6645	0.769049	0.775152
41.6971	0.769298	0.775695
41.7298	0.769063	0.774013
41.7624	0.770277	0.773925
41.795	0.769885	0.775205
41.8277	0.770786	0.774398
41.8603	0.769708	0.774757
41.893	0.769704	0.773865
41.9256	0.770588	0.773813
41.9582	0.770049	0.773895
41.9909	0.769416	0.774637
42.0235	0.769287	0.77389
42.0561	0.770155	0.776214
42.0888	0.769796	0.77704
42.1214	0.770762	0.776274
42.154	0.770626	0.7759
42.1867	0.770634	0.775491
42.2193	0.770796	0.776617
42.252	0.770129	0.776755
42.2846	0.769392	0.776909
42.3172	0.770403	0.77345
42.3499	0.771331	0.774475
42.3825	0.770708	0.776439
42.4151	0.770217	0.775785
42.4478	0.770203	0.776162
42.4804	0.77027	0.775997
42.5131	0.771161	0.775304
42.5457	0.770227	0.776078
42.5783	0.771654	0.777113
42.611	0.771375	0.776178
42.6436	0.771841	0.778381
42.6762	0.771876	0.778079
42.7089	0.771588	0.777026
42.7415	0.771443	0.776477
42.7742	0.771226	0.777329
42.8068	0.771771	0.778071
42.8394	0.772783	0.779182
42.8721	0.77219	0.77894
42.9047	0.772138	0.779354
42.9373	0.772173	0.77861
42.97	0.772612	0.776456
43.0026	0.771445	0.776922
43.0352	0.771628	0.776993
43.0679	0.771434	0.776849
43.1005	0.772505	0.775183
43.1332	0.772337	0.776638
43.1658	0.773317	0.779525
43.1984	0.772963	0.779359
43.2311	0.773855	0.778102
43.2637	0.773469	0.779649
43.2963	0.773261	0.779843
43.329	0.773833	0.778605
43.3616	0.773906	0.778517
43.3943	0.773214	0.778752
43.4269	0.774352	0.77729
43.4595	0.774225	0.777459
43.4922	0.774424	0.780436
43.5248	0.774655	0.780122
43.5574	0.774845	0.778044
43.5901	0.774906	0.777793
43.6227	0.774439	0.779493
43.6554	0.774544	0.778832
43.688	0.774457	0.780423
43.7206	0.775164	0.779492
43.7533	0.774319	0.780379
43.7859	0.774846	0.779844
43.8185	0.77486	0.780131
43.8512	0.775122	0.780008
43.8838	0.776248	0.779319
43.9164	0.776123	0.779351
43.9491	0.775289	0.779144
43.9817	0.775528	0.779232
44.0144	0.775293	0.778674
44.047	0.775178	0.779989
44.0796	0.77549	0.781357
44.1123	0.775305	0.782054
44.1449	0.776898	0.780968
44.1775	0.776275	0.780795
44.2102	0.7768	0.780214
44.2428	0.776986	0.780999
44.2755	0.776904	0.782516
44.3081	0.776654	0.782216
44.3407	0.777061	0.783143
44.3734	0.777285	0.783551
44.406	0.777931	0.782724
44.4386	0.778421	0.781905
44.4713	0.777566	0.782488
44.5039	0.777269	0.781923
44.5366	0.777918	0.782322
44.5692	0.778355	0.783208
44.6018	0.778434	0.782206
44.6345	0.779044	0.784449
44.6671	0.779527	0.783313
44.6997	0.778177	0.783399
44.7324	0.778399	0.782635
44.765	0.77976	0.784252
44.7977	0.779143	0.78491
44.8303	0.778161	0.785133
44.8629	0.779334	0.786274
44.8956	0.778742	0.78463
44.9282	0.778924	0.78409
44.9608	0.78081	0.787934
44.9935	0.781403	0.786336
45.0261	0.778998	0.786263
45.0587	0.779428	0.787713
45.0914	0.780943	0.786053
45.124	0.78006	0.788324
45.1567	0.780827	0.784939
45.1893	0.78077	0.786094
45.2219	0.781077	0.786742
45.2546	0.781842	0.786304
45.2872	0.781629	0.78806
45.3198	0.782144	0.78787
45.3525	0.781524	0.787692
45.3851	0.781574	0.787138
45.4178	0.782327	0.787953
45.4504	0.783631	0.787748
45.483	0.783744	0.787255
45.5157	0.784136	0.787938
45.5483	0.782853	0.788381
45.5809	0.783049	0.789673
45.6136	0.78324	0.789941
45.6462	0.783578	0.790272
45.6789	0.784444	0.788979
45.7115	0.783939	0.790065
45.7441	0.785694	0.791359
45.7768	0.785892	0.79001
45.8094	0.784778	0.792044
45.842	0.784372	0.790965
45.8747	0.784877	0.792509
45.9073	0.78482	0.792045
45.9399	0.785061	0.790253
45.9726	0.785951	0.791215
46.0052	0.786933	0.790012
46.0379	0.78702	0.79025
46.0705	0.786004	0.792472
46.1031	0.786702	0.792735
46.1358	0.785671	0.794394
46.1684	0.786367	0.793175
46.201	0.789205	0.795153
46.2337	0.789045	0.794076
46.2663	0.789019	0.793059
46.299	0.789037	0.794574
46.3316	0.788234	0.794726
46.3642	0.788557	0.793299
46.3969	0.789351	0.793173
46.4295	0.789087	0.795497
46.4621	0.790663	0.795163
46.4948	0.790693	0.794587
46.5274	0.790182	0.794706
46.5601	0.790942	0.794971
46.5927	0.791055	0.79713
46.6253	0.792245	0.798021
46.658	0.793922	0.797131
46.6906	0.79225	0.795658
46.7232	0.792014	0.795574
46.7559	0.793115	0.797191
46.7885	0.793442	0.797572
46.8211	0.794014	0.79794
46.8538	0.792945	0.798033
46.8864	0.793197	0.799657
46.9191	0.794612	0.799658
46.9517	0.795049	0.799396
46.9843	0.794292	0.800768
47.017	0.795205	0.800394
47.0496	0.795684	0.799446
47.0822	0.796409	0.800529
47.1149	0.796662	0.80114
47.1475	0.796706	0.801084
47.1802	0.797794	0.801546
47.2128	0.796456	0.8034
47.2454	0.797188	0.803819
47.2781	0.796898	0.802658
47.3107	0.797839	0.803408
47.3433	0.798592	0.803764
47.376	0.799862	0.802741
47.4086	0.798669	0.80395
47.4413	0.799264	0.804353
47.4739	0.798709	0.803113
47.5065	0.799689	0.805065
47.5392	0.800256	0.804856
47.5718	0.799975	0.805736
47.6044	0.801158	0.804341
47.6371	0.801117	0.804762
47.6697	0.802572	0.806174
47.7023	0.803026	0.806432
47.735	0.802193	0.807457
47.7676	0.801729	0.805824
47.8003	0.803792	0.808518
47.8329	0.804498	0.809533
47.8655	0.804344	0.806983
47.8982	0.804025	0.80857
47.9308	0.803177	0.808583
47.9634	0.804127	0.809588
47.9961	0.804931	0.811253
48.0287	0.804612	0.810704
48.0614	0.804585	0.811682
48.094	0.805396	0.810631
48.1266	0.808689	0.811125
48.1593	0.808592	0.811901
48.1919	0.809083	0.812013
48.2245	0.80908	0.811818
48.2572	0.808278	0.814499
48.2898	0.809038	0.814515
48.3225	0.809338	0.812686
48.3551	0.809407	0.813424
48.3877	0.80903	0.815102
48.4204	0.810477	0.81592
48.453	0.809907	0.817377
48.4856	0.811413	0.816627
48.5183	0.812196	0.816897
48.5509	0.811767	0.816952
48.5836	0.811477	0.816689
48.6162	0.813168	0.816425
48.6488	0.813163	0.817719
48.6815	0.813171	0.81913
48.7141	0.814559	0.819139
48.7467	0.815286	0.818404
48.7794	0.815378	0.818023
48.812	0.815947	0.81905
48.8446	0.815721	0.818434
48.8773	0.814315	0.820975
48.9099	0.816455	0.819305
48.9426	0.816566	0.820812
48.9752	0.817564	0.822141
49.0078	0.816937	0.8206
49.0405	0.817515	0.819249
49.0731	0.818625	0.82271
49.1057	0.819562	0.822529
49.1384	0.819222	0.823058
49.171	0.819098	0.823859
49.2037	0.818597	0.823857
49.2363	0.818704	0.824753
49.2689	0.819908	0.823918
49.3016	0.821145	0.82456
49.3342	0.820141	0.825843
49.3668	0.820791	0.823821
49.3995	0.82094	0.82436
49.4321	0.821755	0.826406
49.4648	0.822465	0.827029
49.4974	0.82354	0.825924
49.53	0.823047	0.826966
49.5627	0.82289	0.82763
49.5953	0.823763	0.828353
49.6279	0.823786	0.828531
49.6606	0.824216	0.82806
49.6932	0.824553	0.827366
49.7258	0.823781	0.828675
49.7585	0.82433	0.830169
49.7911	0.824889	0.83075
49.8238	0.825529	0.832565
49.8564	0.826268	0.830304
49.889	0.826157	0.830534
49.9217	0.826712	0.83176
49.9543	0.826424	0.830636
49.9869	0.826957	0.833006
50.0196	0.828389	0.832475
50.0522	0.826871	0.831819
50.0849	0.827458	0.83086
50.1175	0.827923	0.83389
50.1501	0.827361	0.833715
50.1828	0.828675	0.832594
50.2154	0.828387	0.833137
50.248	0.828619	0.834657
50.2807	0.828998	0.835442
50.3133	0.829887	0.83417
50.346	0.829402	0.836081
50.3786	0.829369	0.835625
50.4112	0.828999	0.836881
50.4439	0.829473	0.836459
50.4765	0.829817	0.834851
50.5091	0.831872	0.837586
50.5418	0.830408	0.837258
50.5744	0.829386	0.838443
50.607	0.830346	0.837137
50.6397	0.830631	0.838113
50.6723	0.831273	0.837814
50.705	0.831999	0.839085
50.7376	0.831912	0.840086
50.7702	0.832233	0.836662
50.8029	0.832185	0.837849
50.8355	0.832294	0.837518
50.8681	0.831483	0.83833
50.9008	0.830206	0.839552
50.9334	0.83154	0.839414
50.9661	0.832169	0.839534
50.9987	0.832645	0.839303
51.0313	0.832257	0.83929
51.064	0.832505	0.840516
51.0966	0.831507	0.84027
51.1292	0.832932	0.839823
51.1619	0.832743	0.840614
51.1945	0.83312	0.840275
51.2272	0.834914	0.839095
51.2598	0.834167	0.839293
51.2924	0.831623	0.84103
51.3251	0.832494	0.840653
51.3577	0.83347	0.840306
51.3903	0.833015	0.839537
51.423	0.832109	0.839792
51.4556	0.833206	0.840393
51.4883	0.833831	0.841593
51.5209	0.833689	0.841395
51.5535	0.833577	0.840965
51.5862	0.833663	0.841264
51.6188	0.833993	0.840525
51.6514	0.834239	0.841084
51.6841	0.834452	0.840668
51.7167	0.834198	0.841928
51.7493	0.834653	0.841652
51.782	0.834156	0.841816
51.8146	0.834545	0.840895
51.8473	0.833815	0.840017
51.8799	0.833458	0.839709
51.9125	0.833328	0.840202
51.9452	0.833875	0.842154
51.9778	0.834436	0.841693
52.0104	0.834934	0.842653
52.0431	0.834005	0.840522
52.0757	0.833332	0.842173
52.1084	0.834875	0.841181
52.141	0.834785	0.841482
52.1736	0.834943	0.841153
52.2063	0.834936	0.842069
52.2389	0.833415	0.839949
52.2715	0.83549	0.840656
52.3042	0.834285	0.842452
52.3368	0.834591	0.842447
52.3695	0.834011	0.844286
52.4021	0.833617	0.844292
52.4347	0.833703	0.842233
52.4674	0.833878	0.841991
52.5	0.833987	0.844287
52.5326	0.833586	0.843928
52.5653	0.832864	0.842806
52.5979	0.833248	0.842243
52.6305	0.833115	0.843061
52.6632	0.833202	0.842631
52.6958	0.834577	0.840987
52.7285	0.835396	0.840342
52.7611	0.834154	0.840828
52.7937	0.833746	0.841111
52.8264	0.834979	0.841847
52.859	0.834006	0.843979
52.8916	0.833716	0.84151
52.9243	0.833598	0.842339
52.9569	0.834167	0.84296
52.9896	0.832993	0.84255
53.0222	0.834393	0.842435
53.0548	0.833956	0.842949
53.0875	0.834022	0.842357
53.1201	0.833844	0.842554
53.1527	0.83447	0.843106
53.1854	0.833333	0.843129
53.218	0.833644	0.843117
53.2507	0.834308	0.842179
53.2833	0.834688	0.84334
53.3159	0.833647	0.842896
53.3486	0.833689	0.842372
53.3812	0.833037	0.843557
53.4138	0.834047	0.840869
53.4465	0.833093	0.841601
53.4791	0.834301	0.842427
53.5117	0.833414	0.843191
53.5444	0.834083	0.842888
53.577	0.833	0.842782
53.6097	0.834388	0.843939
53.6423	0.834381	0.84187
53.6749	0.832586	0.842271
53.7076	0.832768	0.840729
53.7402	0.832346	0.839846
53.7728	0.832169	0.841457
53.8055	0.832973	0.84233
53.8381	0.833296	0.842003
53.8708	0.831992	0.841136
53.9034	0.832528	0.841283
53.936	0.834095	0.842163
53.9687	0.832714	0.840342
54.0013	0.832439	0.840926
54.0339	0.833142	0.843359
54.0666	0.833946	0.844933
54.0992	0.83378	0.841113
54.1319	0.833602	0.840871
54.1645	0.832945	0.841946
54.1971	0.833083	0.843447
54.2298	0.832546	0.84195
54.2624	0.832299	0.842681
54.295	0.832565	0.842209
54.3277	0.832563	0.843039
54.3603	0.832763	0.844335
54.393	0.833654	0.844688
54.4256	0.832644	0.842947
54.4582	0.833056	0.842047
54.4909	0.832609	0.842493
54.5235	0.832938	0.842382
54.5561	0.833167	0.84212
54.5888	0.83293	0.842561
54.6214	0.831813	0.841717
54.654	0.832553	0.84402
54.6867	0.831888	0.842565
54.7193	0.833798	0.843631
54.752	0.833183	0.842317
54.7846	0.832566	0.84263
54.8172	0.832258	0.843538
54.8499	0.832732	0.843798
54.8825	0.833578	0.843816
54.9151	0.832469	0.843337
54.9478	0.83298	0.840992
54.9804	0.833005	0.841766
55.0131	0.832734	0.842757
55.0457	0.832223	0.841917
55.0783	0.833385	0.841765
55.111	0.832479	0.843132
55.1436	0.832298	0.842461
55.1762	0.833358	0.842452
55.2089	0.83339	0.841564
55.2415	0.832401	0.840996
55.2742	0.833059	0.842282
55.3068	0.832804	0.844379
55.3394	0.832311	0.841741
55.3721	0.832566	0.842618
55.4047	0.831015	0.842861
55.4373	0.832814	0.841157
55.47	0.83389	0.840585
55.5026	0.833756	0.840268
55.5352	0.832233	0.842102
55.5679	0.832248	0.842545
55.6005	0.833474	0.844954
55.6332	0.832482	0.843048
55.6658	0.831631	0.843642
55.6984	0.832261	0.842166
55.7311	0.832993	0.842159
55.7637	0.832593	0.843062
55.7963	0.832316	0.843789
55.829	0.832199	0.842956
55.8616	0.832006	0.84199
55.8943	0.83259	0.842102
55.9269	0.833264	0.842387
55.9595	0.831675	0.841685
55.9922	0.8321	0.840624
56.0248	0.832075	0.841237
56.0574	0.83229	0.841876
56.0901	0.83224	0.844323
56.1227	0.832053	0.845119
56.1554	0.832198	0.843551
56.188	0.832262	0.841397
56.2206	0.832136	0.841885
56.2533	0.832636	0.841519
56.2859	0.832497	0.843455
56.3185	0.833186	0.842307
56.3512	0.83269	0.843223
56.3838	0.832326	0.841801
56.4164	0.832508	0.842152
56.4491	0.831958	0.844451
56.4817	0.833222	0.843325
56.5144	0.832512	0.84355
56.547	0.83191	0.842887
56.5796	0.831862	0.844357
56.6123	0.831878	0.842148
56.6449	0.831865	0.844111
56.6775	0.832643	0.843709
56.7102	0.831733	0.842967
56.7428	0.83322	0.842989
56.7755	0.83246	0.844316
56.8081	0.832813	0.841869
56.8407	0.832908	0.841559
56.8734	0.833453	0.844083
56.906	0.832429	0.843008
56.9386	0.832166	0.841073
56.9713	0.832898	0.842983
57.0039	0.832218	0.843453
57.0366	0.831986	0.844859
57.0692	0.831034	0.843223
57.1018	0.830777	0.843715
57.1345	0.833731	0.843292
57.1671	0.833618	0.843586
57.1997	0.832997	0.844611
57.2324	0.832997	0.843629
57.265	0.831106	0.842349
57.2977	0.83204	0.842357
57.3303	0.832968	0.842389
57.3629	0.832129	0.84437
57.3956	0.83144	0.845517
57.4282	0.832195	0.843955
57.4608	0.831905	0.844398
57.4935	0.832209	0.8431
57.5261	0.832945	0.845353
57.5587	0.831845	0.844283
57.5914	0.832505	0.843184
57.624	0.832732	0.843121
57.6567	0.832466	0.841689
57.6893	0.831597	0.844409
57.7219	0.831931	0.844877
57.7546	0.831992	0.845699
57.7872	0.832583	0.845334
57.8198	0.832644	0.845724
57.8525	0.832834	0.848989
57.8851	0.833444	0.84421
57.9178	0.83283	0.844574
57.9504	0.832965	0.844549
57.983	0.832393	0.844948
58.0157	0.833057	0.842492
58.0483	0.832678	0.843084
58.0809	0.832706	0.845817
58.1136	0.832547	0.845725
58.1462	0.831833	0.844907
58.1789	0.832196	0.844067
58.2115	0.831603	0.843947
58.2441	0.832049	0.843807
58.2768	0.833293	0.844618
58.3094	0.831944	0.845766
58.342	0.832197	0.84324
58.3747	0.832035	0.843284
58.4073	0.831835	0.845041
58.4399	0.832966	0.843834
58.4726	0.832708	0.845146
58.5052	0.831943	0.846296
58.5379	0.832651	0.841645
58.5705	0.832378	0.843336
58.6031	0.833647	0.84555
58.6358	0.832929	0.847106
58.6684	0.832511	0.845265
58.701	0.832263	0.843116
58.7337	0.831748	0.846228
58.7663	0.831648	0.845803
58.799	0.830412	0.848462
58.8316	0.831068	0.846977
58.8642	0.832664	0.841533
58.8969	0.831861	0.842762
58.9295	0.833026	0.845133
58.9621	0.832424	0.845175
58.9948	0.832485	0.844956
59.0274	0.831438	0.843798
59.0601	0.832547	0.843963
59.0927	0.832741	0.845689
59.1253	0.832095	0.845489
59.158	0.831897	0.843871
59.1906	0.83201	0.845467
59.2232	0.832754	0.847455
59.2559	0.83272	0.845779
59.2885	0.832513	0.843912
59.3211	0.832307	0.844374
59.3538	0.832049	0.847215
59.3864	0.832116	0.846259
59.4191	0.832435	0.845633
59.4517	0.831983	0.845341
59.4843	0.831388	0.845004
59.517	0.831538	0.845663
59.5496	0.832934	0.846348
59.5822	0.832864	0.845669
59.6149	0.83285	0.845177
59.6475	0.833282	0.844872
59.6802	0.832769	0.845058
59.7128	0.832681	0.846339
59.7454	0.832317	0.846135
59.7781	0.832813	0.845807
59.8107	0.832539	0.845658
59.8433	0.833192	0.845275
59.876	0.833236	0.845834
59.9086	0.833185	0.846461
59.9413	0.832464	0.846898
59.9739	0.833757	0.847031
60.0065	0.831381	0.847988
60.0392	0.83091	0.845601
60.0718	0.832127	0.847339
60.1044	0.832987	0.846051
60.1371	0.831548	0.846997
60.1697	0.831511	0.847767
60.2023	0.832105	0.844701
60.235	0.83339	0.845461
60.2676	0.832488	0.846207
60.3003	0.83325	0.84477
60.3329	0.83253	0.844245
60.3655	0.832376	0.842822
60.3982	0.832251	0.84681
60.4308	0.832117	0.846672
60.4634	0.831717	0.845759
60.4961	0.830752	0.846832
60.5287	0.833597	0.845359
60.5614	0.834292	0.845341
60.594	0.830866	0.848266
60.6266	0.830874	0.847817
60.6593	0.832448	0.84741
60.6919	0.833228	0.846808
60.7245	0.8324	0.848524
60.7572	0.832366	0.847618
60.7898	0.83235	0.847498
60.8225	0.833514	0.849703
60.8551	0.831205	0.847333
60.8877	0.831083	0.845734
60.9204	0.832733	0.845631
60.953	0.832541	0.847057
60.9856	0.832068	0.845011
61.0183	0.832956	0.844555
61.0509	0.832751	0.847266
61.0836	0.833534	0.84617
61.1162	0.832768	0.845629
61.1488	0.832777	0.846321
61.1815	0.833515	0.846884
61.2141	0.832995	0.846639
61.2467	0.832103	0.847924
61.2794	0.831521	0.845703
61.312	0.832243	0.848013
61.3446	0.832489	0.847731
61.3773	0.830424	0.846726
61.4099	0.831606	0.847766
61.4426	0.831448	0.844671
61.4752	0.832149	0.845134
61.5078	0.831688	0.847157
61.5405	0.831004	0.848414
61.5731	0.832758	0.848586
61.6057	0.832552	0.84702
61.6384	0.83309	0.846322
61.671	0.831451	0.848347
61.7037	0.831055	0.848108
61.7363	0.831321	0.84896
61.7689	0.832809	0.845998
61.8016	0.831909	0.847
61.8342	0.832243	0.84692
61.8668	0.833066	0.84652
61.8995	0.832087	0.84847
61.9321	0.8315	0.847368
61.9648	0.832393	0.848902
61.9974	0.833135	0.847764
62.03	0.832348	0.850267
62.0627	0.832402	0.850614
62.0953	0.831592	0.847936
62.1279	0.832312	0.848401
62.1606	0.83284	0.850722
62.1932	0.832581	0.850057
62.2258	0.832506	0.847391
62.2585	0.832448	0.847678
62.2911	0.832272	0.850066
62.3238	0.832268	0.849246
62.3564	0.832412	0.848302
62.389	0.832227	0.849814
62.4217	0.831599	0.850124
62.4543	0.83127	0.847582
62.4869	0.831939	0.849827
62.5196	0.832831	0.850782
62.5522	0.831656	0.852192
62.5849	0.832824	0.851369
62.6175	0.833056	0.849661
62.6501	0.832488	0.848929
62.6828	0.83234	0.847254
62.7154	0.832263	0.848046
62.748	0.832683	0.846689
62.7807	0.832819	0.849528
62.8133	0.832944	0.847926
62.846	0.832153	0.848216
62.8786	0.832455	0.848347
62.9112	0.832607	0.848142
62.9439	0.832825	0.849259
62.9765	0.833381	0.850537
63.0091	0.833094	0.850524
63.0418	0.832197	0.848232
63.0744	0.833384	0.848928
63.107	0.831978	0.847108
63.1397	0.831301	0.849239
63.1723	0.832454	0.850101
63.205	0.832423	0.84961
63.2376	0.833035	0.84956
63.2702	0.832348	0.850266
63.3029	0.833275	0.84848
63.3355	0.832794	0.849485
63.3681	0.832386	0.849154
63.4008	0.832276	0.850069
63.4334	0.834183	0.846277
63.4661	0.833666	0.848747
63.4987	0.833005	0.852288
63.5313	0.833969	0.851164
63.564	0.832416	0.846447
63.5966	0.833151	0.84815
63.6292	0.834373	0.849951
63.6619	0.833567	0.851253
63.6945	0.832587	0.852081
63.7272	0.833019	0.849829
63.7598	0.832587	0.849855
63.7924	0.832955	0.84938
63.8251	0.832779	0.849384
63.8577	0.832797	0.850845
63.8903	0.833186	0.849808
63.923	0.833231	0.849981
63.9556	0.833312	0.852176
63.9883	0.832976	0.849963
64.0209	0.833843	0.849184
64.0535	0.832655	0.850827
64.0862	0.832635	0.850534
64.1188	0.832734	0.848506
64.1514	0.832617	0.849473
64.1841	0.832557	0.853314
64.2167	0.832759	0.853485
64.2493	0.833118	0.851355
64.282	0.833485	0.850974
64.3146	0.834255	0.850384
64.3473	0.833562	0.851559
64.3799	0.832672	0.852272
64.4125	0.833256	0.851668
64.4452	0.832742	0.852333
64.4778	0.832792	0.853988
64.5104	0.833686	0.850647
64.5431	0.83351	0.850725
64.5757	0.833215	0.848767
64.6084	0.832959	0.850353
64.641	0.833229	0.850733
64.6736	0.832746	0.849849
64.7063	0.834166	0.851704
64.7389	0.832882	0.853851
64.7715	0.833029	0.851251
64.8042	0.8339	0.848331
64.8368	0.831391	0.850984
64.8695	0.832048	0.850111
64.9021	0.832798	0.85354
64.9347	0.831922	0.852983
64.9674	0.833267	0.852587
65	0.8328	0.851859
65.0326	0.833963	0.852391
65.0653	0.832684	0.851226
65.0979	0.834136	0.848539
65.1305	0.834281	0.84887
65.1632	0.833146	0.85486
65.1958	0.834309	0.853851
65.2285	0.832795	0.851155
65.2611	0.833199	0.850739
65.2937	0.833614	0.852184
65.3264	0.83324	0.85317
65.359	0.832896	0.853404
65.3916	0.832743	0.852879
65.4243	0.832701	0.852069
65.4569	0.834307	0.851116
65.4896	0.834129	0.849396
65.5222	0.833904	0.851881
65.5548	0.83437	0.853589
65.5875	0.833238	0.850355
65.6201	0.832726	0.851903
65.6527	0.833914	0.853487
65.6854	0.833018	0.853091
65.718	0.834572	0.850559
65.7507	0.834582	0.852494
65.7833	0.833715	0.853375
65.8159	0.834722	0.851915
65.8486	0.833278	0.854207
65.8812	0.834089	0.852828
65.9138	0.834746	0.851847
65.9465	0.83514	0.853297
65.9791	0.833289	0.8529
66.0117	0.833842	0.853198
66.0444	0.833279	0.852721
66.077	0.834196	0.85309
66.1097	0.833366	0.850536
66.1423	0.832935	0.852078
66.1749	0.834224	0.852178
66.2076	0.833944	0.851061
66.2402	0.834514	0.853309
66.2728	0.834561	0.854003
66.3055	0.833748	0.853855
66.3381	0.833606	0.8549
66.3708	0.835584	0.851312
66.4034	0.835543	0.851085
66.436	0.832657	0.853567
66.4687	0.833248	0.853717
66.5013	0.835078	0.851892
66.5339	0.835119	0.85286
66.5666	0.834638	0.851259
66.5992	0.834445	0.852372
66.6319	0.834055	0.851929
66.6645	0.833824	0.852493
66.6971	0.835184	0.855185
66.7298	0.83589	0.855051
66.7624	0.835014	0.852958
66.795	0.834362	0.853315
66.8277	0.834789	0.853267
66.8603	0.835413	0.854057
66.893	0.834817	0.853713
66.9256	0.833952	0.85519
66.9582	0.833542	0.853897
66.9909	0.833223	0.854233
67.0235	0.833918	0.853063
67.0561	0.834374	0.852297
67.0888	0.834404	0.851897
67.1214	0.833782	0.852583
67.154	0.834206	0.852528
67.1867	0.835231	0.852354
67.2193	0.83413	0.854759
67.252	0.834407	0.854654
67.2846	0.835102	0.853999
67.3172	0.83478	0.854301
67.3499	0.834915	0.852405
67.3825	0.834352	0.852485
67.4151	0.834907	0.85389
67.4478	0.835226	0.852644
67.4804	0.834435	0.85064
67.5131	0.834794	0.854495
67.5457	0.834343	0.85485
67.5783	0.834321	0.854253
67.611	0.833858	0.85486
67.6436	0.834825	0.854823
67.6762	0.834929	0.855686
67.7089	0.835204	0.855479
67.7415	0.834285	0.855253
67.7742	0.834473	0.853544
67.8068	0.834772	0.852942
67.8394	0.834469	0.852144
67.8721	0.834936	0.853066
67.9047	0.835581	0.8533
67.9373	0.835466	0.856229
67.97	0.835263	0.853456
68.0026	0.835523	0.853
68.0352	0.834469	0.852801
68.0679	0.834426	0.85338
68.1005	0.835164	0.852644
68.1332	0.834502	0.851439
68.1658	0.834347	0.85561
68.1984	0.833692	0.855141
68.2311	0.836973	0.854069
68.2637	0.836189	0.851822
68.2963	0.836259	0.852969
68.329	0.835476	0.853582
68.3616	0.835926	0.855312
68.3943	0.835317	0.855866
68.4269	0.835738	0.856537
68.4595	0.836806	0.856391
68.4922	0.837077	0.851569
68.5248	0.8358	0.851966
68.5574	0.835023	0.854637
68.5901	0.834951	0.856231
68.6227	0.835762	0.85568
68.6554	0.835333	0.855685
68.688	0.835515	0.853664
68.7206	0.836031	0.853804
68.7533	0.836721	0.854556
68.7859	0.836447	0.853753
68.8185	0.836542	0.854122
68.8512	0.836878	0.855341
68.8838	0.836125	0.854242
68.9164	0.836307	0.854843
68.9491	0.836243	0.857075
68.9817	0.835733	0.856654
69.0144	0.83591	0.85497
69.047	0.835561	0.855642
69.0796	0.834938	0.854313
69.1123	0.835442	0.855315
69.1449	0.835134	0.856297
69.1775	0.834609	0.855899
69.2102	0.835866	0.856883
69.2428	0.836372	0.856223
69.2755	0.836404	0.855228
69.3081	0.834784	0.856102
69.3407	0.836696	0.856286
69.3734	0.837045	0.854887
69.406	0.836738	0.853879
69.4386	0.837279	0.855976
69.4713	0.836073	0.857698
69.5039	0.83646	0.855532
69.5366	0.836379	0.854337
69.5692	0.836951	0.855187
69.6018	0.836245	0.85351
69.6345	0.837238	0.85501
69.6671	0.835081	0.855281
69.6997	0.836019	0.856118
69.7324	0.836051	0.855449
69.765	0.83621	0.855042
69.7977	0.836235	0.856984
69.8303	0.835673	0.856296
69.8629	0.8367	0.85644
69.8956	0.837041	0.856725
69.9282	0.836642	0.857264
69.9608	0.836137	0.857665
69.9935	0.835852	0.85926
70.0261	0.836846	0.857946
70.0587	0.837334	0.857294
70.0914	0.837072	0.85699
70.124	0.8373	0.856819
70.1567	0.836252	0.855785
70.1893	0.836809	0.857334
70.2219	0.836617	0.856298
70.2546	0.836131	0.854867
70.2872	0.836841	0.85499
70.3198	0.836985	0.85617
70.3525	0.836619	0.856025
70.3851	0.837205	0.85453
70.4178	0.837328	0.855377
70.4504	0.835865	0.857222
70.483	0.836016	0.858445
70.5157	0.836105	0.857411
70.5483	0.836924	0.85662
70.5809	0.837422	0.856458
70.6136	0.836667	0.854756
70.6462	0.836521	0.855189
70.6789	0.837107	0.855893
70.7115	0.837491	0.854739
70.7441	0.837371	0.85585
70.7768	0.838222	0.855908
70.8094	0.835846	0.855826
70.842	0.835203	0.855132
70.8747	0.837155	0.856479
70.9073	0.836857	0.856454
70.9399	0.836615	0.856869
70.9726	0.837438	0.857978
71.0052	0.836074	0.858145
71.0379	0.83685	0.858343
71.0705	0.83789	0.858535
71.1031	0.838507	0.859467
71.1358	0.837385	0.858381
71.1684	0.836683	0.857896
71.201	0.836583	0.856645
71.2337	0.836524	0.85774
71.2663	0.837337	0.857694
71.299	0.837848	0.859999
71.3316	0.837912	0.856235
71.3642	0.837956	0.856181
71.3969	0.837427	0.857852
71.4295	0.837164	0.858487
71.4621	0.837475	0.858166
71.4948	0.83721	0.858149
71.5274	0.836906	0.857627
71.5601	0.837792	0.858126
71.5927	0.838284	0.858388
71.6253	0.83936	0.858301
71.658	0.838134	0.858254
71.6906	0.83807	0.858732
71.7232	0.83793	0.857038
71.7559	0.837444	0.85607
71.7885	0.838342	0.858228
71.8211	0.838324	0.858361
71.8538	0.837661	0.856763
71.8864	0.837275	0.857577
71.9191	0.838713	0.853613
71.9517	0.838156	0.856929
71.9843	0.838095	0.860071
72.017	0.83786	0.858467
72.0496	0.838949	0.857632
72.0822	0.838192	0.857846
72.1149	0.837238	0.858893
72.1475	0.837946	0.858915
72.1802	0.838721	0.856555
72.2128	0.838837	0.856456
72.2454	0.837311	0.856805
72.2781	0.83699	0.858455
72.3107	0.83882	0.858808
72.3433	0.837918	0.857408
72.376	0.837752	0.857383
72.4086	0.838364	0.858573
72.4413	0.837371	0.857479
72.4739	0.838351	0.859172
72.5065	0.838748	0.860642
72.5392	0.837414	0.859468
72.5718	0.837036	0.85919
72.6044	0.839289	0.858126
72.6371	0.838887	0.85738
72.6697	0.83945	0.857846
72.7023	0.839169	0.856805
72.735	0.838412	0.858457
72.7676	0.838175	0.857777
72.8003	0.837952	0.859595
72.8329	0.838464	0.858095
72.8655	0.839105	0.858382
72.8982	0.839102	0.860742
72.9308	0.838324	0.857197
72.9634	0.83867	0.857801
72.9961	0.839436	0.860181
73.0287	0.838831	0.860319
73.0614	0.838694	0.85972
73.094	0.838114	0.859501
73.1266	0.839124	0.858727
73.1593	0.83963	0.859723
73.1919	0.838712	0.860577
73.2245	0.839217	0.860372
73.2572	0.838466	0.860362
73.2898	0.838866	0.859164
73.3225	0.838231	0.858784
73.3551	0.839428	0.859926
73.3877	0.838506	0.858926
73.4204	0.83906	0.860459
73.453	0.838418	0.861206
73.4856	0.839348	0.860558
73.5183	0.839236	0.86229
73.5509	0.838842	0.86069
73.5836	0.837991	0.858987
73.6162	0.83831	0.859929
73.6488	0.839934	0.861776
73.6815	0.838578	0.861738
73.7141	0.837862	0.859724
73.7467	0.838773	0.85879
73.7794	0.838094	0.859913
73.812	0.838152	0.858108
73.8446	0.838899	0.861084
73.8773	0.839473	0.860879
73.9099	0.839192	0.861348
73.9426	0.839763	0.860563
73.9752	0.83978	0.859652
74.0078	0.839294	0.859232
74.0405	0.838034	0.860497
74.0731	0.838294	0.862632
74.1057	0.839173	0.863831
74.1384	0.83914	0.859493
74.171	0.839646	0.8596
74.2037	0.839638	0.860636
74.2363	0.838936	0.861313
74.2689	0.839843	0.860552
74.3016	0.839713	0.858028
74.3342	0.839937	0.861901
74.3668	0.840998	0.862134
74.3995	0.840756	0.861633
74.4321	0.839923	0.860892
74.4648	0.839464	0.861589
74.4974	0.839091	0.863023
74.53	0.83927	0.858246
74.5627	0.838315	0.859552
74.5953	0.839951	0.86099
74.6279	0.839936	0.857986
74.6606	0.839551	0.860833
74.6932	0.839693	0.859954
74.7258	0.839928	0.862303
74.7585	0.839917	0.863215
74.7911	0.839545	0.862796
74.8238	0.839742	0.860173
74.8564	0.841261	0.859575
74.889	0.840305	0.858761
74.9217	0.840099	0.862301
74.9543	0.840004	0.861055
74.9869	0.839126	0.861348
75.0196	0.838964	0.861158
75.0522	0.839117	0.8602
75.0849	0.839535	0.85985
75.1175	0.839561	0.860468
75.1501	0.841153	0.862311
75.1828	0.840656	0.861823
75.2154	0.839908	0.860899
75.248	0.839792	0.861942
75.2807	0.84055	0.859004
75.3133	0.839993	0.859589
75.346	0.840764	0.861799
75.3786	0.839808	0.863118
75.4112	0.841255	0.859997
75.4439	0.840639	0.85873
75.4765	0.840604	0.859631
75.5091	0.840521	0.860978
75.5418	0.842041	0.863194
75.5744	0.841477	0.862923
75.607	0.840804	0.861306
75.6397	0.840428	0.861902
75.6723	0.841261	0.858848
75.705	0.841286	0.860914
75.7376	0.840434	0.862629
75.7702	0.839722	0.86137
75.8029	0.840098	0.863344
75.8355	0.840796	0.862099
75.8681	0.840806	0.860887
75.9008	0.840899	0.860992
75.9334	0.840242	0.859187
75.9661	0.839941	0.860149
75.9987	0.839354	0.861412
76.0313	0.839475	0.860814
76.064	0.839818	0.860842
76.0966	0.839777	0.861008
76.1292	0.84015	0.861071
76.1619	0.840226	0.863967
76.1945	0.840134	0.864172
76.2272	0.84156	0.86217
76.2598	0.841171	0.861559
76.2924	0.840384	0.861578
76.3251	0.839996	0.862086
76.3577	0.842109	0.862211
76.3903	0.841285	0.86195
76.423	0.841262	0.861128
76.4556	0.84122	0.861448
76.4883	0.841314	0.86075
76.5209	0.841624	0.861971
76.5535	0.842202	0.86365
76.5862	0.841716	0.862003
76.6188	0.84134	0.860726
76.6514	0.841391	0.861248
76.6841	0.840882	0.861362
76.7167	0.84092	0.86083
76.7493	0.84199	0.860993
76.782	0.840935	0.860565
76.8146	0.8414	0.856678
76.8473	0.840635	0.862412
76.8799	0.841383	0.862882
76.9125	0.841679	0.860429
76.9452	0.842177	0.861603
76.9778	0.840571	0.861534
77.0104	0.841048	0.860951
77.0431	0.841537	0.865538
77.0757	0.841383	0.864963
77.1084	0.841047	0.858879
77.141	0.84167	0.861606
77.1736	0.839926	0.86388
77.2063	0.840616	0.862952
77.2389	0.841933	0.862888
77.2715	0.841793	0.863674
77.3042	0.840661	0.862923
77.3368	0.841106	0.861337
77.3695	0.84179	0.862204
77.4021	0.84156	0.863248
77.4347	0.841386	0.863976
77.4674	0.842043	0.863158
77.5	0.841158	0.862334
77.5326	0.841878	0.862216
77.5653	0.84166	0.859758
77.5979	0.841737	0.863096
77.6305	0.841175	0.862817
77.6632	0.841586	0.863621
77.6958	0.841316	0.865331
77.7285	0.843182	0.864027
77.7611	0.843884	0.863307
77.7937	0.840783	0.864534
77.8264	0.839534	0.861607
77.859	0.840217	0.863327
77.8916	0.839926	0.86565
77.9243	0.842005	0.864162
77.9569	0.842895	0.863154
77.9896	0.842028	0.865184
78.0222	0.842103	0.86316
78.0548	0.842149	0.861924
78.0875	0.840785	0.863447
78.1201	0.84179	0.862339
78.1527	0.841915	0.86303
78.1854	0.842682	0.861657
78.218	0.842574	0.861624
78.2507	0.84191	0.863787
78.2833	0.841586	0.861869
78.3159	0.841338	0.862024
78.3486	0.84096	0.865817
78.3812	0.841945	0.863173
78.4138	0.841126	0.862437
78.4465	0.840885	0.865455
78.4791	0.84116	0.86578
78.5117	0.841836	0.865059
78.5444	0.842392	0.863947
78.577	0.842709	0.863983
78.6097	0.842142	0.86407
78.6423	0.841402	0.86286
78.6749	0.841729	0.863111
78.7076	0.842089	0.86372
78.7402	0.842859	0.864651
78.7728	0.844319	0.86579
78.8055	0.842032	0.864094
78.8381	0.842875	0.864374
78.8708	0.841208	0.862414
78.9034	0.842384	0.865012
78.936	0.842233	0.864126
78.9687	0.842369	0.865792
79.0013	0.843781	0.862369
79.0339	0.843436	0.863302
79.0666	0.842928	0.863815
79.0992	0.843086	0.865335
79.1319	0.842686	0.867207
79.1645	0.842772	0.863417
79.1971	0.841401	0.862271
79.2298	0.842305	0.864178
79.2624	0.843131	0.862921
79.295	0.843	0.865054
79.3277	0.84387	0.866164
79.3603	0.843828	0.865941
79.393	0.841483	0.866308
79.4256	0.841262	0.864494
79.4582	0.841442	0.863848
79.4909	0.842165	0.864763
79.5235	0.841719	0.863573
79.5561	0.844191	0.863855
79.5888	0.842666	0.862919
79.6214	0.841949	0.864105
79.654	0.841846	0.866474
79.6867	0.842959	0.865306
79.7193	0.842331	0.863922
79.752	0.842411	0.863606
79.7846	0.841807	0.865344
79.8172	0.843779	0.866881
79.8499	0.843978	0.868137
79.8825	0.843247	0.863779
79.9151	0.841239	0.863722
79.9478	0.842068	0.865755
79.9804	0.843489	0.865093
80.0131	0.843305	0.864252
80.0457	0.84306	0.865523
80.0783	0.84197	0.866084
80.111	0.843159	0.867148
80.1436	0.842561	0.862039
80.1762	0.842446	0.861386
[truncated: 301 more rows]

## Sheet: Fig1-S1A- 1st deriv. of ratio
Temperature, °C	First derivative: d(Em350/Em330)/dT
	VPS34-CII WT	mCherry-VPS34-CII WT
15	0.000428	0.000779
15.033	0.000426	0.000777
15.065	0.000425	0.000775
15.098	0.000423	0.000772
15.131	0.000422	0.00077
15.163	0.00042	0.000767
15.196	0.000419	0.000765
15.228	0.000417	0.000763
15.261	0.000416	0.00076
15.294	0.000414	0.000758
15.326	0.000413	0.000756
15.359	0.000411	0.000753
15.392	0.00041	0.000751
15.424	0.000408	0.000749
15.457	0.000407	0.000746
15.49	0.000405	0.000744
15.522	0.000404	0.000742
15.555	0.000402	0.000739
15.587	0.000401	0.000737
15.62	0.000399	0.000735
15.653	0.000398	0.000732
15.685	0.000396	0.00073
15.718	0.000395	0.000728
15.751	0.000394	0.000725
15.783	0.000392	0.000723
15.816	0.000391	0.000721
15.849	0.000389	0.000719
15.881	0.000388	0.000716
15.914	0.000386	0.000714
15.946	0.000385	0.000712
15.979	0.000383	0.000709
16.012	0.000382	0.000707
16.044	0.000381	0.000705
16.077	0.000379	0.000703
16.11	0.000378	0.0007
16.142	0.000376	0.000698
16.175	0.000375	0.000696
16.208	0.000374	0.000694
16.24	0.000372	0.000691
16.273	0.000371	0.000689
16.305	0.00037	0.000687
16.338	0.000368	0.000684
16.371	0.000367	0.000682
16.403	0.000366	0.00068
16.436	0.000364	0.000678
16.469	0.000363	0.000676
16.501	0.000362	0.000673
16.534	0.00036	0.000671
16.567	0.000359	0.000669
16.599	0.000358	0.000667
16.632	0.000356	0.000664
16.664	0.000355	0.000662
16.697	0.000354	0.00066
16.73	0.000353	0.000658
16.762	0.000351	0.000655
16.795	0.00035	0.000653
16.828	0.000349	0.000651
16.86	0.000348	0.000649
16.893	0.000346	0.000646
16.926	0.000345	0.000644
16.958	0.000344	0.000642
16.991	0.000343	0.00064
17.023	0.000342	0.000637
17.056	0.000341	0.000635
17.089	0.000339	0.000633
17.121	0.000338	0.000631
17.154	0.000337	0.000628
17.187	0.000336	0.000626
17.219	0.000335	0.000624
17.252	0.000334	0.000622
17.285	0.000333	0.000619
17.317	0.000331	0.000617
17.35	0.00033	0.000615
17.383	0.000329	0.000613
17.415	0.000328	0.00061
17.448	0.000327	0.000608
17.48	0.000326	0.000606
17.513	0.000325	0.000604
17.546	0.000324	0.000601
17.578	0.000323	0.000599
17.611	0.000322	0.000597
17.644	0.000321	0.000594
17.676	0.00032	0.000592
17.709	0.000319	0.00059
17.742	0.000318	0.000588
17.774	0.000317	0.000585
17.807	0.000316	0.000583
17.839	0.000315	0.000581
17.872	0.000314	0.000578
17.905	0.000313	0.000576
17.937	0.000312	0.000574
17.97	0.000311	0.000571
18.003	0.00031	0.000569
18.035	0.000309	0.000566
18.068	0.000308	0.000564
18.101	0.000307	0.000562
18.133	0.000306	0.000559
18.166	0.000305	0.000557
18.198	0.000304	0.000555
18.231	0.000303	0.000552
18.264	0.000302	0.00055
18.296	0.000301	0.000547
18.329	0.000299	0.000545
18.362	0.000298	0.000543
18.394	0.000297	0.00054
18.427	0.000296	0.000538
18.46	0.000295	0.000535
18.492	0.000294	0.000533
18.525	0.000292	0.000531
18.557	0.000291	0.000528
18.59	0.00029	0.000526
18.623	0.000289	0.000524
18.655	0.000287	0.000521
18.688	0.000286	0.000519
18.721	0.000285	0.000517
18.753	0.000284	0.000514
18.786	0.000283	0.000512
18.819	0.000282	0.00051
18.851	0.000281	0.000508
18.884	0.00028	0.000505
18.916	0.000279	0.000503
18.949	0.000279	0.000501
18.982	0.000278	0.000499
19.014	0.000277	0.000497
19.047	0.000276	0.000494
19.08	0.000275	0.000492
19.112	0.000274	0.00049
19.145	0.000273	0.000488
19.178	0.000272	0.000486
19.21	0.000272	0.000484
19.243	0.000271	0.000482
19.275	0.00027	0.00048
19.308	0.000269	0.000478
19.341	0.000268	0.000476
19.373	0.000267	0.000474
19.406	0.000267	0.000472
19.439	0.000266	0.00047
19.471	0.000265	0.000468
19.504	0.000264	0.000467
19.537	0.000264	0.000465
19.569	0.000263	0.000463
19.602	0.000262	0.000461
19.634	0.000262	0.000459
19.667	0.000261	0.000458
19.7	0.00026	0.000456
19.732	0.00026	0.000454
19.765	0.000259	0.000452
19.798	0.000259	0.000451
19.83	0.000258	0.000449
19.863	0.000258	0.000447
19.896	0.000257	0.000446
19.928	0.000257	0.000444
19.961	0.000256	0.000442
19.993	0.000256	0.000441
20.026	0.000256	0.000439
20.059	0.000255	0.000438
20.091	0.000255	0.000436
20.124	0.000255	0.000434
20.157	0.000255	0.000433
20.189	0.000254	0.000431
20.222	0.000254	0.000429
20.255	0.000254	0.000428
20.287	0.000254	0.000426
20.32	0.000254	0.000425
20.352	0.000254	0.000423
20.385	0.000254	0.000421
20.418	0.000254	0.00042
20.45	0.000253	0.000418
20.483	0.000253	0.000417
20.516	0.000253	0.000415
20.548	0.000254	0.000413
20.581	0.000254	0.000412
20.614	0.000254	0.00041
20.646	0.000254	0.000409
20.679	0.000254	0.000407
20.711	0.000254	0.000405
20.744	0.000254	0.000404
20.777	0.000254	0.000402
20.809	0.000254	0.000401
20.842	0.000255	0.000399
20.875	0.000255	0.000398
20.907	0.000255	0.000396
20.94	0.000255	0.000394
20.973	0.000256	0.000393
21.005	0.000256	0.000391
21.038	0.000256	0.00039
21.07	0.000256	0.000388
21.103	0.000257	0.000387
21.136	0.000257	0.000385
21.168	0.000257	0.000384
21.201	0.000258	0.000383
21.234	0.000258	0.000381
21.266	0.000258	0.00038
21.299	0.000259	0.000378
21.332	0.000259	0.000377
21.364	0.000259	0.000376
21.397	0.000259	0.000374
21.43	0.00026	0.000373
21.462	0.00026	0.000372
21.495	0.00026	0.000371
21.527	0.000261	0.000369
21.56	0.000261	0.000368
21.593	0.000261	0.000367
21.625	0.000261	0.000366
21.658	0.000261	0.000365
21.691	0.000262	0.000364
21.723	0.000262	0.000363
21.756	0.000262	0.000362
21.789	0.000262	0.000361
21.821	0.000263	0.000361
21.854	0.000263	0.00036
21.886	0.000263	0.000359
21.919	0.000263	0.000359
21.952	0.000263	0.000358
21.984	0.000263	0.000358
22.017	0.000264	0.000357
22.05	0.000264	0.000357
22.082	0.000264	0.000357
22.115	0.000264	0.000357
22.148	0.000264	0.000357
22.18	0.000264	0.000357
22.213	0.000264	0.000357
22.245	0.000265	0.000357
22.278	0.000265	0.000357
22.311	0.000265	0.000357
22.343	0.000265	0.000358
22.376	0.000265	0.000358
22.409	0.000265	0.000358
22.441	0.000265	0.000359
22.474	0.000265	0.00036
22.507	0.000266	0.00036
22.539	0.000266	0.000361
22.572	0.000266	0.000362
22.604	0.000266	0.000363
22.637	0.000266	0.000364
22.67	0.000267	0.000365
22.702	0.000267	0.000366
22.735	0.000267	0.000368
22.768	0.000267	0.000369
22.8	0.000268	0.00037
22.833	0.000268	0.000372
22.866	0.000268	0.000373
22.898	0.000269	0.000374
22.931	0.000269	0.000376
22.963	0.000269	0.000378
22.996	0.00027	0.000379
23.029	0.00027	0.000381
23.061	0.000271	0.000383
23.094	0.000271	0.000384
23.127	0.000272	0.000386
23.159	0.000273	0.000388
23.192	0.000273	0.00039
23.225	0.000274	0.000392
23.257	0.000275	0.000394
23.29	0.000275	0.000396
23.322	0.000276	0.000397
23.355	0.000277	0.000399
23.388	0.000278	0.000401
23.42	0.000279	0.000403
23.453	0.00028	0.000405
23.486	0.00028	0.000407
23.518	0.000281	0.000409
23.551	0.000283	0.000411
23.584	0.000284	0.000413
23.616	0.000285	0.000415
23.649	0.000286	0.000417
23.681	0.000287	0.000419
23.714	0.000288	0.000421
23.747	0.000289	0.000423
23.779	0.000291	0.000425
23.812	0.000292	0.000427
23.845	0.000293	0.000429
23.877	0.000294	0.000431
23.91	0.000296	0.000433
23.943	0.000297	0.000435
23.975	0.000298	0.000437
24.008	0.0003	0.000439
24.04	0.000301	0.000441
24.073	0.000303	0.000443
24.106	0.000304	0.000444
24.138	0.000305	0.000446
24.171	0.000307	0.000448
24.204	0.000308	0.00045
24.236	0.00031	0.000452
24.269	0.000311	0.000453
24.302	0.000312	0.000455
24.334	0.000314	0.000457
24.367	0.000315	0.000459
24.399	0.000317	0.00046
24.432	0.000318	0.000462
24.465	0.000319	0.000464
24.497	0.000321	0.000466
24.53	0.000322	0.000467
24.563	0.000324	0.000469
24.595	0.000325	0.000471
24.628	0.000326	0.000472
24.661	0.000328	0.000474
24.693	0.000329	0.000475
24.726	0.00033	0.000477
24.758	0.000331	0.000479
24.791	0.000333	0.00048
24.824	0.000334	0.000482
24.856	0.000335	0.000483
24.889	0.000336	0.000485
24.922	0.000337	0.000486
24.954	0.000338	0.000488
24.987	0.00034	0.000489
25.02	0.000341	0.000491
25.052	0.000342	0.000492
25.085	0.000343	0.000493
25.117	0.000344	0.000495
25.15	0.000344	0.000496
25.183	0.000345	0.000497
25.215	0.000346	0.000499
25.248	0.000347	0.0005
25.281	0.000348	0.000501
25.313	0.000349	0.000503
25.346	0.000349	0.000504
25.379	0.00035	0.000505
25.411	0.000351	0.000506
25.444	0.000351	0.000507
25.477	0.000352	0.000508
25.509	0.000353	0.00051
25.542	0.000353	0.000511
25.574	0.000354	0.000512
25.607	0.000354	0.000513
25.64	0.000355	0.000514
25.672	0.000355	0.000515
25.705	0.000355	0.000515
25.738	0.000356	0.000516
25.77	0.000356	0.000517
25.803	0.000356	0.000518
25.836	0.000357	0.000519
25.868	0.000357	0.000519
25.901	0.000357	0.00052
25.933	0.000357	0.000521
25.966	0.000357	0.000521
25.999	0.000357	0.000522
26.031	0.000358	0.000522
26.064	0.000358	0.000523
26.097	0.000358	0.000523
26.129	0.000358	0.000523
26.162	0.000358	0.000523
26.195	0.000358	0.000524
26.227	0.000357	0.000524
26.26	0.000357	0.000524
26.292	0.000357	0.000524
26.325	0.000357	0.000524
26.358	0.000357	0.000524
26.39	0.000356	0.000524
26.423	0.000356	0.000524
26.456	0.000356	0.000524
26.488	0.000356	0.000523
26.521	0.000355	0.000523
26.554	0.000355	0.000523
26.586	0.000354	0.000522
26.619	0.000354	0.000522
26.651	0.000354	0.000522
26.684	0.000353	0.000521
26.717	0.000353	0.000521
26.749	0.000352	0.00052
26.782	0.000351	0.00052
26.815	0.000351	0.000519
26.847	0.00035	0.000518
26.88	0.00035	0.000518
26.913	0.000349	0.000517
26.945	0.000348	0.000516
26.978	0.000348	0.000516
27.01	0.000347	0.000515
27.043	0.000346	0.000514
27.076	0.000345	0.000514
27.108	0.000345	0.000513
27.141	0.000344	0.000512
27.174	0.000343	0.000511
27.206	0.000342	0.000511
27.239	0.000341	0.00051
27.272	0.00034	0.000509
27.304	0.000339	0.000508
27.337	0.000338	0.000507
27.369	0.000337	0.000507
27.402	0.000336	0.000506
27.435	0.000335	0.000505
27.467	0.000334	0.000504
27.5	0.000333	0.000504
27.533	0.000332	0.000503
27.565	0.000331	0.000502
27.598	0.00033	0.000501
27.631	0.000329	0.0005
27.663	0.000328	0.0005
27.696	0.000327	0.000499
27.728	0.000326	0.000498
27.761	0.000325	0.000498
27.794	0.000324	0.000497
27.826	0.000323	0.000496
27.859	0.000322	0.000496
27.892	0.00032	0.000495
27.924	0.000319	0.000494
27.957	0.000318	0.000494
27.99	0.000317	0.000493
28.022	0.000316	0.000493
28.055	0.000315	0.000492
28.087	0.000314	0.000492
28.12	0.000313	0.000491
28.153	0.000312	0.000491
28.185	0.000311	0.000491
28.218	0.000311	0.00049
28.251	0.00031	0.00049
28.283	0.000309	0.00049
28.316	0.000308	0.000489
28.349	0.000307	0.000489
28.381	0.000307	0.000489
28.414	0.000306	0.000489
28.446	0.000306	0.000488
28.479	0.000305	0.000488
28.512	0.000305	0.000488
28.544	0.000304	0.000488
28.577	0.000304	0.000488
28.61	0.000304	0.000488
28.642	0.000304	0.000488
28.675	0.000303	0.000488
28.708	0.000303	0.000488
28.74	0.000304	0.000488
28.773	0.000304	0.000488
28.805	0.000304	0.000489
28.838	0.000304	0.000489
28.871	0.000305	0.000489
28.903	0.000305	0.000489
28.936	0.000306	0.00049
28.969	0.000306	0.00049
29.001	0.000307	0.000491
29.034	0.000308	0.000491
29.067	0.000309	0.000492
29.099	0.00031	0.000492
29.132	0.000311	0.000493
29.164	0.000312	0.000493
29.197	0.000313	0.000494
29.23	0.000314	0.000495
29.262	0.000316	0.000495
29.295	0.000317	0.000496
29.328	0.000319	0.000497
29.36	0.00032	0.000498
29.393	0.000322	0.000499
29.426	0.000324	0.0005
29.458	0.000325	0.000501
29.491	0.000327	0.000501
29.523	0.000329	0.000503
29.556	0.000331	0.000504
29.589	0.000333	0.000505
29.621	0.000336	0.000506
29.654	0.000338	0.000507
29.687	0.00034	0.000508
29.719	0.000342	0.000509
29.752	0.000345	0.000511
29.785	0.000347	0.000512
29.817	0.000349	0.000513
29.85	0.000352	0.000515
29.883	0.000354	0.000516
29.915	0.000357	0.000518
29.948	0.000359	0.000519
29.98	0.000362	0.000521
30.013	0.000364	0.000522
30.046	0.000367	0.000524
30.078	0.00037	0.000525
30.111	0.000372	0.000527
30.144	0.000375	0.000529
30.176	0.000377	0.000531
30.209	0.00038	0.000532
30.242	0.000383	0.000534
30.274	0.000385	0.000536
30.307	0.000388	0.000538
30.339	0.000391	0.00054
30.372	0.000393	0.000542
30.405	0.000396	0.000544
30.437	0.000399	0.000546
30.47	0.000401	0.000549
30.503	0.000404	0.000551
30.535	0.000406	0.000553
30.568	0.000409	0.000555
30.601	0.000411	0.000558
30.633	0.000414	0.00056
30.666	0.000416	0.000562
30.698	0.000419	0.000565
30.731	0.000422	0.000567
30.764	0.000424	0.00057
30.796	0.000427	0.000572
30.829	0.000429	0.000574
30.862	0.000432	0.000577
30.894	0.000434	0.000579
30.927	0.000437	0.000582
30.96	0.000439	0.000585
30.992	0.000442	0.000587
31.025	0.000444	0.00059
31.057	0.000447	0.000592
31.09	0.000449	0.000595
31.123	0.000452	0.000597
31.155	0.000454	0.0006
31.188	0.000457	0.000602
31.221	0.000459	0.000605
31.253	0.000462	0.000607
31.286	0.000464	0.00061
31.319	0.000467	0.000612
31.351	0.000469	0.000615
31.384	0.000472	0.000617
31.416	0.000475	0.00062
31.449	0.000477	0.000622
31.482	0.00048	0.000624
31.514	0.000483	0.000627
31.547	0.000485	0.000629
31.58	0.000488	0.000631
31.612	0.000491	0.000633
31.645	0.000493	0.000635
31.678	0.000496	0.000637
31.71	0.000499	0.000639
31.743	0.000502	0.000641
31.775	0.000504	0.000643
31.808	0.000507	0.000645
31.841	0.00051	0.000647
31.873	0.000513	0.000649
31.906	0.000516	0.000651
31.939	0.000519	0.000652
31.971	0.000522	0.000654
32.004	0.000525	0.000656
32.037	0.000528	0.000657
32.069	0.000531	0.000659
32.102	0.000534	0.00066
32.134	0.000537	0.000661
32.167	0.00054	0.000663
32.2	0.000543	0.000664
32.232	0.000546	0.000665
32.265	0.000549	0.000666
32.298	0.000552	0.000667
32.33	0.000555	0.000669
32.363	0.000558	0.00067
32.396	0.000561	0.000671
32.428	0.000564	0.000671
32.461	0.000567	0.000672
32.493	0.00057	0.000673
32.526	0.000573	0.000674
32.559	0.000576	0.000675
32.591	0.000578	0.000676
32.624	0.000581	0.000677
32.657	0.000584	0.000677
32.689	0.000587	0.000678
32.722	0.00059	0.000679
32.755	0.000593	0.00068
32.787	0.000595	0.000681
32.82	0.000598	0.000681
32.852	0.000601	0.000682
32.885	0.000603	0.000683
32.918	0.000606	0.000684
32.95	0.000608	0.000685
32.983	0.000611	0.000686
33.016	0.000613	0.000687
33.048	0.000616	0.000688
33.081	0.000618	0.000689
33.114	0.00062	0.00069
33.146	0.000623	0.000691
33.179	0.000625	0.000692
33.211	0.000627	0.000693
33.244	0.000629	0.000694
33.277	0.000631	0.000696
33.309	0.000633	0.000697
33.342	0.000634	0.000698
33.375	0.000636	0.0007
33.407	0.000638	0.000701
33.44	0.00064	0.000703
33.473	0.000641	0.000704
33.505	0.000643	0.000706
33.538	0.000644	0.000708
33.57	0.000645	0.00071
33.603	0.000647	0.000712
33.636	0.000648	0.000713
33.668	0.000649	0.000715
33.701	0.00065	0.000717
33.734	0.000651	0.000719
33.766	0.000652	0.000721
33.799	0.000653	0.000723
33.832	0.000654	0.000726
33.864	0.000655	0.000728
33.897	0.000656	0.00073
33.93	0.000657	0.000732
33.962	0.000657	0.000734
33.995	0.000658	0.000737
34.027	0.000659	0.000739
34.06	0.00066	0.000741
34.093	0.00066	0.000744
34.125	0.000661	0.000746
34.158	0.000661	0.000748
34.191	0.000662	0.00075
34.223	0.000663	0.000753
34.256	0.000663	0.000755
34.289	0.000664	0.000757
34.321	0.000664	0.00076
34.354	0.000665	0.000762
34.386	0.000666	0.000764
34.419	0.000666	0.000766
34.452	0.000667	0.000769
34.484	0.000668	0.000771
34.517	0.000668	0.000773
34.55	0.000669	0.000775
34.582	0.00067	0.000777
34.615	0.000671	0.000779
34.648	0.000672	0.000781
34.68	0.000672	0.000783
34.713	0.000673	0.000785
34.745	0.000674	0.000787
34.778	0.000675	0.000789
34.811	0.000676	0.000791
34.843	0.000677	0.000793
34.876	0.000679	0.000795
34.909	0.00068	0.000797
34.941	0.000681	0.000799
34.974	0.000682	0.000801
35.007	0.000684	0.000803
35.039	0.000685	0.000805
35.072	0.000686	0.000806
35.104	0.000688	0.000808
35.137	0.00069	0.00081
35.17	0.000691	0.000812
35.202	0.000693	0.000814
35.235	0.000695	0.000815
35.268	0.000697	0.000817
35.3	0.000699	0.000819
35.333	0.0007	0.000821
35.366	0.000703	0.000823
35.398	0.000705	0.000825
35.431	0.000707	0.000827
35.463	0.000709	0.000828
35.496	0.000711	0.00083
35.529	0.000714	0.000832
35.561	0.000716	0.000835
35.594	0.000719	0.000837
35.627	0.000721	0.000839
35.659	0.000724	0.000841
35.692	0.000727	0.000843
35.725	0.000729	0.000845
35.757	0.000732	0.000848
35.79	0.000735	0.00085
35.822	0.000738	0.000853
35.855	0.000741	0.000855
35.888	0.000744	0.000858
35.92	0.000747	0.000861
35.953	0.00075	0.000863
35.986	0.000753	0.000866
36.018	0.000756	0.000869
36.051	0.00076	0.000872
36.084	0.000763	0.000875
36.116	0.000766	0.000878
36.149	0.000769	0.000882
36.181	0.000773	0.000885
36.214	0.000776	0.000888
36.247	0.00078	0.000892
36.279	0.000783	0.000896
36.312	0.000787	0.000899
36.345	0.00079	0.000903
36.377	0.000794	0.000907
36.41	0.000797	0.000911
36.443	0.000801	0.000915
36.475	0.000805	0.000919
36.508	0.000808	0.000924
36.54	0.000812	0.000928
36.573	0.000816	0.000933
36.606	0.000819	0.000937
36.638	0.000823	0.000942
36.671	0.000827	0.000947
36.704	0.000831	0.000951
36.736	0.000835	0.000956
36.769	0.000838	0.000961
36.802	0.000842	0.000966
36.834	0.000846	0.000971
36.867	0.00085	0.000976
36.899	0.000854	0.000982
36.932	0.000858	0.000987
36.965	0.000862	0.000992
36.997	0.000866	0.000998
37.03	0.00087	0.001003
37.063	0.000874	0.001009
37.095	0.000878	0.001014
37.128	0.000882	0.00102
37.161	0.000886	0.001025
37.193	0.00089	0.001031
37.226	0.000894	0.001037
37.258	0.000898	0.001042
37.291	0.000902	0.001048
37.324	0.000906	0.001054
37.356	0.00091	0.001059
37.389	0.000915	0.001065
37.422	0.000919	0.001071
37.454	0.000923	0.001077
37.487	0.000927	0.001082
37.52	0.000931	0.001088
37.552	0.000935	0.001094
37.585	0.000939	0.001099
37.617	0.000944	0.001105
37.65	0.000948	0.001111
37.683	0.000952	0.001116
37.715	0.000956	0.001122
37.748	0.000961	0.001128
37.781	0.000965	0.001133
37.813	0.000969	0.001139
37.846	0.000973	0.001144
37.879	0.000978	0.00115
37.911	0.000982	0.001155
37.944	0.000986	0.001161
37.977	0.000991	0.001166
38.009	0.000995	0.001172
38.042	0.001	0.001177
38.074	0.001004	0.001182
38.107	0.001009	0.001188
38.14	0.001013	0.001193
38.172	0.001018	0.001198
38.205	0.001022	0.001204
38.238	0.001027	0.001209
38.27	0.001031	0.001214
38.303	0.001036	0.001219
38.336	0.001041	0.001224
38.368	0.001045	0.00123
38.401	0.00105	0.001235
38.433	0.001055	0.00124
38.466	0.00106	0.001245
38.499	0.001064	0.00125
38.531	0.001069	0.001256
38.564	0.001074	0.001261
38.597	0.001079	0.001266
38.629	0.001085	0.001271
38.662	0.00109	0.001277
38.695	0.001095	0.001282
38.727	0.0011	0.001287
38.76	0.001105	0.001293
38.792	0.001111	0.001298
38.825	0.001116	0.001303
38.858	0.001122	0.001309
38.89	0.001127	0.001315
38.923	0.001133	0.00132
38.956	0.001139	0.001326
38.988	0.001145	0.001332
39.021	0.001151	0.001337
39.054	0.001157	0.001343
39.086	0.001163	0.001349
39.119	0.001169	0.001355
39.151	0.001175	0.001361
39.184	0.001182	0.001368
39.217	0.001188	0.001374
39.249	0.001195	0.00138
39.282	0.001202	0.001387
39.315	0.001209	0.001393
39.347	0.001215	0.0014
39.38	0.001223	0.001406
39.413	0.00123	0.001413
39.445	0.001237	0.00142
39.478	0.001244	0.001427
39.51	0.001252	0.001434
39.543	0.00126	0.001442
39.576	0.001267	0.001449
39.608	0.001275	0.001456
39.641	0.001283	0.001464
39.674	0.001292	0.001471
39.706	0.0013	0.001479
39.739	0.001308	0.001487
39.772	0.001317	0.001495
39.804	0.001326	0.001503
39.837	0.001334	0.001511
39.869	0.001343	0.001519
39.902	0.001353	0.001527
39.935	0.001362	0.001535
39.967	0.001371	0.001544
40	0.001381	0.001552
40.033	0.00139	0.001561
40.065	0.0014	0.00157
40.098	0.00141	0.001579
40.131	0.00142	0.001587
40.163	0.001431	0.001596
40.196	0.001441	0.001606
40.228	0.001452	0.001615
40.261	0.001462	0.001624
40.294	0.001473	0.001633
40.326	0.001484	0.001643
40.359	0.001495	0.001652
40.392	0.001506	0.001662
40.424	0.001518	0.001671
40.457	0.001529	0.001681
40.49	0.001541	0.001691
40.522	0.001553	0.001701
40.555	0.001565	0.001711
40.587	0.001577	0.001722
40.62	0.00159	0.001732
40.653	0.001602	0.001742
40.685	0.001615	0.001753
40.718	0.001628	0.001764
40.751	0.001641	0.001774
40.783	0.001654	0.001785
40.816	0.001667	0.001797
40.849	0.00168	0.001808
40.881	0.001694	0.001819
40.914	0.001708	0.001831
40.946	0.001722	0.001843
40.979	0.001736	0.001854
41.012	0.00175	0.001867
41.044	0.001765	0.001879
41.077	0.001779	0.001891
41.11	0.001794	0.001904
41.142	0.001809	0.001917
41.175	0.001824	0.00193
41.208	0.00184	0.001943
41.24	0.001855	0.001957
41.273	0.001871	0.001971
41.305	0.001887	0.001985
41.338	0.001903	0.001999
41.371	0.001919	0.002014
41.403	0.001936	0.002028
41.436	0.001952	0.002043
41.469	0.001969	0.002059
41.501	0.001986	0.002075
41.534	0.002004	0.00209
41.567	0.002021	0.002107
41.599	0.002039	0.002123
41.632	0.002057	0.00214
41.664	0.002076	0.002157
41.697	0.002094	0.002175
41.73	0.002113	0.002193
41.762	0.002132	0.002211
41.795	0.002152	0.00223
41.828	0.002171	0.002249
41.86	0.002191	0.002268
41.893	0.002211	0.002287
41.926	0.002232	0.002307
41.958	0.002253	0.002328
41.991	0.002274	0.002348
42.023	0.002295	0.002369
42.056	0.002317	0.002391
42.089	0.002339	0.002413
42.121	0.002361	0.002435
42.154	0.002384	0.002457
42.187	0.002407	0.00248
42.219	0.00243	0.002503
42.252	0.002454	0.002527
42.285	0.002478	0.002551
42.317	0.002502	0.002575
42.35	0.002527	0.0026
42.383	0.002552	0.002625
42.415	0.002577	0.00265
42.448	0.002603	0.002676
42.48	0.002629	0.002702
42.513	0.002655	0.002729
42.546	0.002682	0.002756
42.578	0.002709	0.002783
42.611	0.002737	0.00281
42.644	0.002765	0.002838
42.676	0.002793	0.002867
42.709	0.002822	0.002895
42.742	0.002851	0.002924
42.774	0.002881	0.002953
42.807	0.002911	0.002983
42.839	0.002941	0.003013
42.872	0.002972	0.003043
42.905	0.003003	0.003074
42.937	0.003034	0.003105
42.97	0.003066	0.003136
43.003	0.003098	0.003168
43.035	0.003131	0.0032
43.068	0.003164	0.003232
43.101	0.003198	0.003265
43.133	0.003232	0.003297
43.166	0.003266	0.003331
43.198	0.003301	0.003364
43.231	0.003336	0.003398
43.264	0.003371	0.003432
43.296	0.003407	0.003466
43.329	0.003443	0.003501
43.362	0.00348	0.003536
43.394	0.003517	0.003571
43.427	0.003554	0.003607
43.46	0.003592	0.003643
43.492	0.00363	0.003679
43.525	0.003669	0.003716
43.557	0.003708	0.003752
43.59	0.003747	0.00379
43.623	0.003787	0.003827
43.655	0.003827	0.003865
43.688	0.003868	0.003903
43.721	0.003909	0.003941
43.753	0.00395	0.00398
43.786	0.003991	0.004019
43.819	0.004033	0.004058
43.851	0.004076	0.004097
43.884	0.004118	0.004137
43.916	0.004161	0.004178
43.949	0.004204	0.004218
43.982	0.004248	0.004259
44.014	0.004292	0.0043
44.047	0.004337	0.004341
44.08	0.004381	0.004383
44.112	0.004426	0.004425
44.145	0.004472	0.004468
44.178	0.004517	0.004511
44.21	0.004563	0.004554
44.243	0.00461	0.004597
44.275	0.004656	0.004641
44.308	0.004703	0.004685
44.341	0.004751	0.004729
44.373	0.004798	0.004774
44.406	0.004846	0.004819
44.439	0.004894	0.004864
44.471	0.004943	0.00491
44.504	0.004992	0.004956
44.537	0.005041	0.005002
44.569	0.00509	0.005049
44.602	0.00514	0.005095
44.634	0.00519	0.005143
44.667	0.00524	0.00519
44.7	0.005291	0.005238
44.732	0.005342	0.005286
44.765	0.005393	0.005334
44.798	0.005444	0.005383
44.83	0.005495	0.005432
44.863	0.005547	0.005481
44.896	0.005599	0.00553
44.928	0.005651	0.00558
44.961	0.005704	0.00563
44.993	0.005757	0.00568
45.026	0.005809	0.005731
45.059	0.005862	0.005781
45.091	0.005916	0.005832
45.124	0.005969	0.005883
45.157	0.006023	0.005934
45.189	0.006077	0.005986
45.222	0.006131	0.006037
45.255	0.006185	0.006089
45.287	0.006239	0.006141
45.32	0.006293	0.006193
45.352	0.006348	0.006245
45.385	0.006402	0.006297
45.418	0.006457	0.00635
45.45	0.006512	0.006402
45.483	0.006566	0.006455
45.516	0.006621	0.006507
45.548	0.006676	0.00656
45.581	0.006731	0.006612
45.614	0.006786	0.006665
45.646	0.006841	0.006718
45.679	0.006896	0.00677
45.711	0.006951	0.006823
45.744	0.007005	0.006875
45.777	0.00706	0.006927
45.809	0.007115	0.00698
45.842	0.007169	0.007032
45.875	0.007224	0.007084
45.907	0.007278	0.007136
45.94	0.007332	0.007188
45.973	0.007386	0.007239
46.005	0.007439	0.007291
46.038	0.007493	0.007342
46.07	0.007546	0.007393
46.103	0.007599	0.007443
46.136	0.007652	0.007494
46.168	0.007704	0.007544
46.201	0.007756	0.007594
46.234	0.007808	0.007643
46.266	0.007859	0.007693
46.299	0.00791	0.007742
46.332	0.00796	0.00779
46.364	0.00801	0.007838
46.397	0.00806	0.007886
46.43	0.008109	0.007933
46.462	0.008157	0.00798
46.495	0.008205	0.008027
46.527	0.008252	0.008073
46.56	0.008299	0.008119
46.593	0.008345	0.008164
46.625	0.00839	0.008209
46.658	0.008435	0.008253
46.691	0.008479	0.008296
46.723	0.008522	0.008339
46.756	0.008565	0.008382
46.789	0.008607	0.008424
46.821	0.008648	0.008465
46.854	0.008688	0.008506
46.886	0.008727	0.008546
46.919	0.008765	0.008586
46.952	0.008803	0.008624
46.984	0.00884	0.008662
47.017	0.008875	0.0087
47.05	0.00891	0.008737
47.082	0.008944	0.008773
47.115	0.008976	0.008808
47.148	0.009008	0.008842
47.18	0.009039	0.008876
47.213	0.009068	0.008909
47.245	0.009096	0.008941
47.278	0.009124	0.008972
47.311	0.00915	0.009003
47.343	0.009175	0.009032
47.376	0.009199	0.009061
47.409	0.009221	0.009089
47.441	0.009243	0.009115
47.474	0.009263	0.009141
47.507	0.009282	0.009166
47.539	0.0093	0.00919
47.572	0.009316	0.009213
47.604	0.009331	0.009235
47.637	0.009345	0.009256
47.67	0.009358	0.009276
47.702	0.009369	0.009295
47.735	0.009379	0.009312
47.768	0.009387	0.009329
47.8	0.009394	0.009344
47.833	0.0094	0.009359
47.866	0.009404	0.009372
47.898	0.009407	0.009384
47.931	0.009409	0.009395
47.963	0.009409	0.009405
47.996	0.009408	0.009413
48.029	0.009405	0.009421
48.061	0.009401	0.009427
48.094	0.009396	0.009432
48.127	0.009389	0.009435
48.159	0.00938	0.009438
48.192	0.009371	0.009439
48.225	0.009359	0.009439
48.257	0.009347	0.009437
48.29	0.009333	0.009435
48.322	0.009317	0.009431
48.355	0.0093	0.009425
48.388	0.009282	0.009418
48.42	0.009262	0.00941
48.453	0.009241	0.009401
48.486	0.009218	0.00939
48.518	0.009194	0.009378
48.551	0.009169	0.009365
48.584	0.009142	0.00935
48.616	0.009114	0.009334
48.649	0.009084	0.009317
48.681	0.009053	0.009298
48.714	0.009021	0.009278
48.747	0.008987	0.009256
48.779	0.008952	0.009234
48.812	0.008915	0.00921
48.845	0.008877	0.009184
48.877	0.008838	0.009157
48.91	0.008798	0.009129
48.943	0.008756	0.0091
48.975	0.008713	0.009069
49.008	0.008669	0.009037
49.04	0.008624	0.009004
49.073	0.008577	0.008969
49.106	0.008529	0.008933
49.138	0.00848	0.008896
49.171	0.008429	0.008858
49.204	0.008378	0.008819
49.236	0.008325	0.008778
49.269	0.008271	0.008736
49.302	0.008216	0.008693
49.334	0.00816	0.008648
49.367	0.008103	0.008603
49.399	0.008045	0.008556
49.432	0.007985	0.008508
49.465	0.007925	0.008459
49.497	0.007864	0.008409
49.53	0.007801	0.008358
49.563	0.007738	0.008306
49.595	0.007674	0.008253
49.628	0.007608	0.008199
49.661	0.007542	0.008144
49.693	0.007475	0.008087
49.726	0.007407	0.00803
49.758	0.007338	0.007972
49.791	0.007269	0.007913
49.824	0.007198	0.007853
49.856	0.007127	0.007792
49.889	0.007055	0.007731
49.922	0.006982	0.007668
49.954	0.006909	0.007605
49.987	0.006834	0.007541
50.02	0.00676	0.007476
50.052	0.006684	0.00741
50.085	0.006608	0.007344
50.117	0.006531	0.007277
50.15	0.006454	0.007209
50.183	0.006376	0.007141
50.215	0.006298	0.007071
50.248	0.006219	0.007002
50.281	0.00614	0.006932
50.313	0.00606	0.006861
50.346	0.00598	0.006789
50.379	0.0059	0.006717
50.411	0.005819	0.006645
50.444	0.005738	0.006572
50.477	0.005656	0.006499
50.509	0.005575	0.006425
50.542	0.005493	0.006351
50.574	0.005411	0.006277
50.607	0.005329	0.006202
50.64	0.005246	0.006127
50.672	0.005164	0.006052
50.705	0.005081	0.005976
50.738	0.004999	0.0059
50.77	0.004916	0.005824
50.803	0.004833	0.005748
50.836	0.004751	0.005672
50.868	0.004668	0.005595
50.901	0.004586	0.005518
50.933	0.004503	0.005442
50.966	0.004421	0.005365
50.999	0.004339	0.005288
51.031	0.004257	0.005211
51.064	0.004176	0.005134
51.097	0.004095	0.005057
51.129	0.004014	0.00498
51.162	0.003933	0.004903
51.195	0.003853	0.004827
51.227	0.003773	0.00475
51.26	0.003693	0.004673
51.292	0.003614	0.004597
51.325	0.003536	0.004521
51.358	0.003458	0.004445
51.39	0.00338	0.004369
51.423	0.003303	0.004294
51.456	0.003226	0.004218
51.488	0.00315	0.004143
51.521	0.003075	0.004069
51.554	0.003	0.003995
51.586	0.002926	0.003921
51.619	0.002853	0.003847
51.651	0.00278	0.003774
51.684	0.002708	0.003701
51.717	0.002637	0.003629
51.749	0.002566	0.003557
51.782	0.002496	0.003486
51.815	0.002427	0.003415
51.847	0.002359	0.003345
51.88	0.002291	0.003275
51.913	0.002225	0.003206
51.945	0.002159	0.003138
51.978	0.002094	0.00307
52.01	0.00203	0.003002
52.043	0.001966	0.002936
52.076	0.001904	0.00287
52.108	0.001842	0.002804
52.141	0.001782	0.00274
52.174	0.001722	0.002676
52.206	0.001663	0.002613
52.239	0.001605	0.00255
52.272	0.001548	0.002489
52.304	0.001492	0.002428
52.337	0.001437	0.002368
52.369	0.001383	0.002309
52.402	0.00133	0.00225
52.435	0.001277	0.002193
52.467	0.001226	0.002136
52.5	0.001176	0.00208
52.533	0.001126	0.002025
52.565	0.001078	0.001971
52.598	0.00103	0.001918
52.631	0.000983	0.001865
52.663	0.000938	0.001814
52.696	0.000893	0.001763
52.728	0.000849	0.001714
52.761	0.000807	0.001665
52.794	0.000765	0.001617
52.826	0.000724	0.001571
52.859	0.000684	0.001525
52.892	0.000645	0.00148
52.924	0.000607	0.001436
52.957	0.00057	0.001394
52.99	0.000533	0.001352
53.022	0.000498	0.001311
53.055	0.000464	0.001271
53.087	0.00043	0.001232
53.12	0.000398	0.001194
53.153	0.000366	0.001157
53.185	0.000335	0.001122
53.218	0.000305	0.001087
53.251	0.000276	0.001053
53.283	0.000248	0.00102
53.316	0.00022	0.000988
53.349	0.000194	0.000957
53.381	0.000168	0.000927
53.414	0.000143	0.000898
53.446	0.000119	0.00087
53.479	9.6e-05	0.000843
53.512	7.4e-05	0.000817
53.544	5.2e-05	0.000791
53.577	3.1e-05	0.000767
53.61	1.1e-05	0.000744
53.642	-8e-06	0.000721
53.675	-2.7e-05	0.000699
53.708	-4.5e-05	0.000679
53.74	-6.2e-05	0.000659
53.773	-7.8e-05	0.00064
53.805	-9.4e-05	0.000621
53.838	-0.000109	0.000604
53.871	-0.000123	0.000587
53.903	-0.000137	0.000572
53.936	-0.00015	0.000557
53.969	-0.000163	0.000542
54.001	-0.000174	0.000529
54.034	-0.000186	0.000516
54.067	-0.000196	0.000504
54.099	-0.000206	0.000492
54.132	-0.000216	0.000482
54.164	-0.000225	0.000472
54.197	-0.000233	0.000462
54.23	-0.000241	0.000453
54.262	-0.000248	0.000445
54.295	-0.000255	0.000438
54.328	-0.000261	0.000431
54.36	-0.000267	0.000424
54.393	-0.000272	0.000418
54.426	-0.000277	0.000413
54.458	-0.000282	0.000408
54.491	-0.000286	0.000403
54.523	-0.00029	0.0004
54.556	-0.000293	0.000396
54.589	-0.000296	0.000393
54.621	-0.000298	0.000391
54.654	-0.000301	0.000388
54.687	-0.000302	0.000387
54.719	-0.000304	0.000385
54.752	-0.000305	0.000384
54.785	-0.000306	0.000384
54.817	-0.000307	0.000383
54.85	-0.000307	0.000383
54.883	-0.000307	0.000384
54.915	-0.000307	0.000385
54.948	-0.000307	0.000386
54.98	-0.000306	0.000387
55.013	-0.000305	0.000388
55.046	-0.000304	0.00039
55.078	-0.000303	0.000392
55.111	-0.000302	0.000395
55.144	-0.0003	0.000397
55.176	-0.000298	0.0004
55.209	-0.000296	0.000403
55.242	-0.000294	0.000406
55.274	-0.000292	0.000409
55.307	-0.000289	0.000413
55.339	-0.000287	0.000416
55.372	-0.000284	0.00042
55.405	-0.000281	0.000424
55.437	-0.000278	0.000428
55.47	-0.000275	0.000433
55.503	-0.000272	0.000437
55.535	-0.000269	0.000441
55.568	-0.000266	0.000446
55.601	-0.000263	0.000451
55.633	-0.000259	0.000456
55.666	-0.000256	0.00046
55.698	-0.000252	0.000465
55.731	-0.000249	0.00047
55.764	-0.000245	0.000476
55.796	-0.000242	0.000481
55.829	-0.000238	0.000486
55.862	-0.000234	0.000491
55.894	-0.000231	0.000497
55.927	-0.000227	0.000502
55.96	-0.000223	0.000507
55.992	-0.000219	0.000513
56.025	-0.000216	0.000518
56.057	-0.000212	0.000524
56.09	-0.000208	0.000529
56.123	-0.000204	0.000535
56.155	-0.000201	0.000541
56.188	-0.000197	0.000546
56.221	-0.000193	0.000552
56.253	-0.00019	0.000558
56.286	-0.000186	0.000563
56.319	-0.000182	0.000569
56.351	-0.000179	0.000574
56.384	-0.000175	0.00058
56.416	-0.000172	0.000586
56.449	-0.000168	0.000591
56.482	-0.000165	0.000597
56.514	-0.000161	0.000603
56.547	-0.000158	0.000608
56.58	-0.000154	0.000614
56.612	-0.000151	0.00062
56.645	-0.000148	0.000625
56.678	-0.000144	0.000631
56.71	-0.000141	0.000637
56.743	-0.000138	0.000642
56.775	-0.000134	0.000648
56.808	-0.000131	0.000653
56.841	-0.000128	0.000659
56.873	-0.000125	0.000664
56.906	-0.000122	0.00067
56.939	-0.000119	0.000675
56.971	-0.000116	0.000681
57.004	-0.000113	0.000686
57.037	-0.00011	0.000691
57.069	-0.000108	0.000696
57.102	-0.000105	0.000702
57.134	-0.000102	0.000707
57.167	-0.0001	0.000712
57.2	-9.7e-05	0.000717
57.232	-9.4e-05	0.000722
57.265	-9.2e-05	0.000727
57.298	-9e-05	0.000731
57.33	-8.7e-05	0.000736
57.363	-8.5e-05	0.000741
57.396	-8.3e-05	0.000745
57.428	-8e-05	0.00075
57.461	-7.8e-05	0.000754
57.493	-7.6e-05	0.000758
57.526	-7.4e-05	0.000763
57.559	-7.2e-05	0.000767
57.591	-7e-05	0.000771
57.624	-6.9e-05	0.000775
57.657	-6.7e-05	0.000779
57.689	-6.5e-05	0.000783
57.722	-6.3e-05	0.000786
57.755	-6.2e-05	0.00079
57.787	-6e-05	0.000793
57.82	-5.9e-05	0.000797
57.852	-5.7e-05	0.0008
57.885	-5.6e-05	0.000803
57.918	-5.4e-05	0.000807
57.95	-5.3e-05	0.00081
57.983	-5.2e-05	0.000813
58.016	-5.1e-05	0.000816
58.048	-4.9e-05	0.000819
58.081	-4.8e-05	0.000821
58.114	-4.7e-05	0.000824
58.146	-4.6e-05	0.000827
58.179	-4.5e-05	0.000829
58.211	-4.4e-05	0.000832
58.244	-4.3e-05	0.000835
58.277	-4.2e-05	0.000837
58.309	-4.1e-05	0.000839
58.342	-4e-05	0.000842
58.375	-4e-05	0.000844
58.407	-3.9e-05	0.000846
58.44	-3.8e-05	0.000849
58.473	-3.7e-05	0.000851
58.505	-3.7e-05	0.000853
58.538	-3.6e-05	0.000855
58.57	-3.5e-05	0.000857
58.603	-3.5e-05	0.000859
58.636	-3.4e-05	0.000861
58.668	-3.3e-05	0.000863
58.701	-3.3e-05	0.000865
58.734	-3.2e-05	0.000867
58.766	-3.1e-05	0.000869
58.799	-3.1e-05	0.00087
58.832	-3e-05	0.000872
58.864	-3e-05	0.000874
58.897	-2.9e-05	0.000876
58.93	-2.8e-05	0.000877
58.962	-2.8e-05	0.000879
58.995	-2.7e-05	0.000881
59.027	-2.7e-05	0.000883
59.06	-2.6e-05	0.000884
59.093	-2.5e-05	0.000886
59.125	-2.4e-05	0.000888
59.158	-2.4e-05	0.000889
59.191	-2.3e-05	0.000891
59.223	-2.2e-05	0.000893
59.256	-2.1e-05	0.000895
59.289	-2e-05	0.000897
59.321	-1.9e-05	0.000898
59.354	-1.8e-05	0.0009
59.386	-1.7e-05	0.000902
59.419	-1.6e-05	0.000904
59.452	-1.4e-05	0.000906
59.484	-1.3e-05	0.000908
59.517	-1.2e-05	0.00091
59.55	-1e-05	0.000912
59.582	-9e-06	0.000914
59.615	-7e-06	0.000916
59.648	-6e-06	0.000918
59.68	-4e-06	0.00092
59.713	-2e-06	0.000922
59.745	-1e-06	0.000924
59.778	1e-06	0.000926
59.811	3e-06	0.000929
59.843	5e-06	0.000931
59.876	7e-06	0.000933
59.909	9e-06	0.000936
59.941	1.2e-05	0.000938
59.974	1.4e-05	0.00094
60.007	1.6e-05	0.000943
60.039	1.9e-05	0.000945
60.072	2.1e-05	0.000948
60.104	2.4e-05	0.00095
60.137	2.6e-05	0.000953
60.17	2.9e-05	0.000955
60.202	3.2e-05	0.000958
60.235	3.4e-05	0.00096
60.268	3.7e-05	0.000963
60.3	4e-05	0.000965
60.333	4.3e-05	0.000968
60.366	4.6e-05	0.00097
60.398	4.9e-05	0.000973
60.431	5.2e-05	0.000975
60.463	5.5e-05	0.000978
60.496	5.8e-05	0.00098
60.529	6.1e-05	0.000983
60.561	6.4e-05	0.000985
60.594	6.7e-05	0.000988
60.627	7e-05	0.00099
60.659	7.3e-05	0.000993
60.692	7.6e-05	0.000995
60.725	7.9e-05	0.000998
60.757	8.2e-05	0.001
60.79	8.5e-05	0.001003
60.822	8.8e-05	0.001005
60.855	9.1e-05	0.001008
60.888	9.4e-05	0.00101
60.92	9.7e-05	0.001013
60.953	0.0001	0.001015
60.986	0.000103	0.001018
61.018	0.000105	0.001021
61.051	0.000108	0.001023
61.084	0.000111	0.001026
61.116	0.000114	0.001028
61.149	0.000116	0.001031
61.181	0.000119	0.001033
61.214	0.000121	0.001036
61.247	0.000124	0.001038
61.279	0.000126	0.001041
61.312	0.000129	0.001043
61.345	0.000131	0.001046
61.377	0.000134	0.001048
61.41	0.000136	0.001051
61.443	0.000138	0.001053
61.475	0.000141	0.001056
61.508	0.000143	0.001058
61.54	0.000145	0.001061
61.573	0.000148	0.001063
61.606	0.00015	0.001066
61.638	0.000152	0.001068
61.671	0.000154	0.001071
61.704	0.000156	0.001073
61.736	0.000158	0.001076
61.769	0.000161	0.001078
61.802	0.000163	0.001081
61.834	0.000165	0.001083
61.867	0.000167	0.001085
61.899	0.000169	0.001088
61.932	0.000172	0.00109
61.965	0.000174	0.001092
61.997	0.000176	0.001094
62.03	0.000178	0.001096
62.063	0.000181	0.001099
62.095	0.000183	0.001101
62.128	0.000185	0.001103
62.161	0.000188	0.001105
62.193	0.00019	0.001107
62.226	0.000193	0.001109
62.258	0.000195	0.00111
62.291	0.000198	0.001112
62.324	0.000201	0.001114
62.356	0.000203	0.001116
62.389	0.000206	0.001117
62.422	0.000209	0.001119
62.454	0.000212	0.00112
62.487	0.000215	0.001122
62.52	0.000218	0.001123
62.552	0.000221	0.001125
62.585	0.000224	0.001126
62.617	0.000227	0.001127
62.65	0.000231	0.001129
62.683	0.000234	0.00113
62.715	0.000237	0.001131
62.748	0.000241	0.001132
62.781	0.000244	0.001133
62.813	0.000248	0.001134
62.846	0.000252	0.001134
62.879	0.000255	0.001135
62.911	0.000259	0.001136
62.944	0.000263	0.001136
62.977	0.000267	0.001137
63.009	0.000271	0.001137
63.042	0.000274	0.001137
63.074	0.000278	0.001138
63.107	0.000282	0.001138
63.14	0.000286	0.001138
63.172	0.00029	0.001138
63.205	0.000294	0.001138
63.238	0.000298	0.001137
63.27	0.000302	0.001137
63.303	0.000306	0.001137
63.336	0.000311	0.001136
63.368	0.000315	0.001136
63.401	0.000319	0.001135
63.433	0.000323	0.001134
63.466	0.000327	0.001133
63.499	0.00033	0.001132
63.531	0.000334	0.001131
63.564	0.000338	0.00113
63.597	0.000342	0.001128
63.629	0.000346	0.001127
63.662	0.00035	0.001125
63.695	0.000353	0.001123
63.727	0.000357	0.001122
63.76	0.000361	0.00112
63.792	0.000364	0.001118
63.825	0.000368	0.001116
63.858	0.000371	0.001114
63.89	0.000374	0.001111
63.923	0.000378	0.001109
63.956	0.000381	0.001106
63.988	0.000384	0.001104
64.021	0.000387	0.001101
64.054	0.00039	0.001099
64.086	0.000393	0.001096
64.119	0.000396	0.001093
64.151	0.000399	0.00109
64.184	0.000402	0.001087
64.217	0.000405	0.001084
64.249	0.000407	0.001081
64.282	0.00041	0.001078
64.315	0.000413	0.001074
64.347	0.000415	0.001071
64.38	0.000418	0.001068
64.413	0.00042	0.001065
64.445	0.000423	0.001061
64.478	0.000425	0.001058
64.51	0.000428	0.001055
64.543	0.00043	0.001051
64.576	0.000432	0.001048
64.608	0.000435	0.001044
64.641	0.000437	0.001041
64.674	0.000439	0.001037
64.706	0.000442	0.001034
64.739	0.000444	0.001031
64.772	0.000446	0.001027
64.804	0.000448	0.001024
64.837	0.000451	0.00102
64.869	0.000453	0.001017
64.902	0.000455	0.001014
64.935	0.000457	0.00101
64.967	0.00046	0.001007
65	0.000462	0.001004
65.033	0.000464	0.001001
65.065	0.000467	0.000997
65.098	0.000469	0.000994
65.131	0.000471	0.000991
65.163	0.000474	0.000988
65.196	0.000476	0.000985
65.228	0.000478	0.000982
65.261	0.000481	0.000979
65.294	0.000483	0.000976
65.326	0.000486	0.000973
65.359	0.000488	0.00097
65.392	0.000491	0.000967
65.424	0.000493	0.000964
65.457	0.000496	0.000962
65.49	0.000499	0.000959
65.522	0.000501	0.000956
65.555	0.000504	0.000954
65.587	0.000507	0.000951
65.62	0.00051	0.000949
65.653	0.000512	0.000947
65.685	0.000515	0.000944
65.718	0.000518	0.000942
65.751	0.000521	0.00094
65.783	0.000524	0.000938
65.816	0.000527	0.000936
65.849	0.00053	0.000934
65.881	0.000533	0.000932
65.914	0.000536	0.00093
65.946	0.000539	0.000928
65.979	0.000542	0.000927
66.012	0.000545	0.000925
66.044	0.000548	0.000923
66.077	0.000551	0.000922
66.11	0.000554	0.00092
66.142	0.000557	0.000919
66.175	0.00056	0.000917
66.208	0.000563	0.000916
66.24	0.000566	0.000915
66.273	0.000569	0.000913
66.305	0.000572	0.000912
66.338	0.000575	0.000911
66.371	0.000578	0.00091
66.403	0.000581	0.000909
66.436	0.000584	0.000908
66.469	0.000586	0.000907
66.501	0.000589	0.000906
66.534	0.000592	0.000905
66.567	0.000594	0.000904
66.599	0.000597	0.000903
66.632	0.000599	0.000902
66.664	0.000602	0.000901
66.697	0.000604	0.0009
66.73	0.000606	0.000899
66.762	0.000609	0.000899
66.795	0.000611	0.000898
66.828	0.000613	0.000897
66.86	0.000615	0.000896
66.893	0.000617	0.000896
66.926	0.000619	0.000895
66.958	0.00062	0.000894
66.991	0.000622	0.000894
67.023	0.000624	0.000893
67.056	0.000625	0.000893
67.089	0.000627	0.000892
67.121	0.000628	0.000892
67.154	0.000629	0.000891
67.187	0.000631	0.000891
67.219	0.000632	0.000891
67.252	0.000633	0.00089
67.285	0.000634	0.00089
67.317	0.000635	0.00089
67.35	0.000636	0.00089
67.383	0.000637	0.00089
67.415	0.000637	0.000889
67.448	0.000638	0.000889
67.48	0.000639	0.000889
67.513	0.000639	0.000889
67.546	0.00064	0.000889
67.578	0.00064	0.00089
67.611	0.000641	0.00089
67.644	0.000641	0.00089
67.676	0.000642	0.00089
67.709	0.000642	0.00089
67.742	0.000642	0.000891
67.774	0.000643	0.000891
67.807	0.000643	0.000891
67.839	0.000643	0.000892
67.872	0.000643	0.000892
67.905	0.000644	0.000892
67.937	0.000644	0.000893
67.97	0.000644	0.000893
68.003	0.000644	0.000894
68.035	0.000644	0.000895
68.068	0.000645	0.000895
68.101	0.000645	0.000896
68.133	0.000645	0.000896
68.166	0.000645	0.000897
68.198	0.000645	0.000898
68.231	0.000646	0.000898
68.264	0.000646	0.000899
68.296	0.000646	0.0009
68.329	0.000646	0.000901
68.362	0.000647	0.000902
68.394	0.000647	0.000903
68.427	0.000647	0.000904
68.46	0.000648	0.000905
68.492	0.000648	0.000906
68.525	0.000649	0.000907
68.557	0.000649	0.000908
68.59	0.00065	0.000909
68.623	0.00065	0.00091
68.655	0.000651	0.000911
68.688	0.000652	0.000912
68.721	0.000652	0.000913
68.753	0.000653	0.000915
68.786	0.000654	0.000916
68.819	0.000654	0.000917
68.851	0.000655	0.000919
68.884	0.000656	0.00092
68.916	0.000657	0.000921
68.949	0.000657	0.000923
68.982	0.000658	0.000924
69.014	0.000659	0.000926
69.047	0.00066	0.000927
69.08	0.000661	0.000929
69.112	0.000662	0.000931
69.145	0.000663	0.000932
69.178	0.000663	0.000934
69.21	0.000664	0.000936
69.243	0.000665	0.000937
69.275	0.000666	0.000939
69.308	0.000667	0.000941
69.341	0.000668	0.000943
69.373	0.000668	0.000945
69.406	0.000669	0.000947
69.439	0.00067	0.000948
69.471	0.00067	0.00095
69.504	0.000671	0.000952
69.537	0.000672	0.000954
69.569	0.000672	0.000956
69.602	0.000673	0.000958
69.634	0.000673	0.00096
69.667	0.000674	0.000962
69.7	0.000674	0.000964
69.732	0.000674	0.000966
69.765	0.000674	0.000969
69.798	0.000675	0.000971
69.83	0.000675	0.000973
69.863	0.000675	0.000975
69.896	0.000675	0.000977
69.928	0.000675	0.000979
69.961	0.000675	0.000981
69.993	0.000675	0.000983
70.026	0.000675	0.000985
70.059	0.000675	0.000987
70.091	0.000675	0.000989
70.124	0.000675	0.000991
70.157	0.000674	0.000993
70.189	0.000674	0.000995
70.222	0.000674	0.000997
70.255	0.000673	0.000999
70.287	0.000673	0.001001
70.32	0.000673	0.001003
70.352	0.000672	0.001005
70.385	0.000672	0.001007
70.418	0.000672	0.001009
70.45	0.000671	0.00101
70.483	0.000671	0.001012
70.516	0.00067	0.001014
70.548	0.00067	0.001015
70.581	0.000669	0.001017
70.614	0.000669	0.001018
70.646	0.000669	0.00102
70.679	0.000668	0.001021
70.711	0.000668	0.001023
70.744	0.000667	0.001024
70.777	0.000667	0.001025
70.809	0.000667	0.001026
70.842	0.000667	0.001027
70.875	0.000666	0.001028
70.907	0.000666	0.001029
70.94	0.000666	0.00103
70.973	0.000666	0.00103
71.005	0.000666	0.001031
71.038	0.000666	0.001031
71.07	0.000666	0.001032
71.103	0.000666	0.001032
71.136	0.000666	0.001032
71.168	0.000666	0.001032
71.201	0.000666	0.001032
71.234	0.000666	0.001032
71.266	0.000667	0.001032
71.299	0.000667	0.001032
71.332	0.000668	0.001032
71.364	0.000668	0.001031
71.397	0.000669	0.001031
71.43	0.000669	0.00103
71.462	0.00067	0.001029
71.495	0.000671	0.001029
71.527	0.000672	0.001028
71.56	0.000673	0.001027
71.593	0.000674	0.001026
71.625	0.000674	0.001025
71.658	0.000675	0.001023
71.691	0.000677	0.001022
71.723	0.000678	0.001021
71.756	0.000679	0.001019
71.789	0.00068	0.001018
71.821	0.000681	0.001016
71.854	0.000682	0.001015
71.886	0.000684	0.001013
71.919	0.000685	0.001011
71.952	0.000686	0.00101
71.984	0.000687	0.001008
72.017	0.000689	0.001006
72.05	0.00069	0.001004
72.082	0.000691	0.001002
72.115	0.000693	0.001
72.148	0.000694	0.000997
72.18	0.000695	0.000995
72.213	0.000697	0.000993
72.245	0.000698	0.000991
72.278	0.000699	0.000988
72.311	0.0007	0.000986
72.343	0.000702	0.000983
72.376	0.000703	0.000981
72.409	0.000704	0.000978
72.441	0.000705	0.000976
72.474	0.000706	0.000973
72.507	0.000707	0.00097
72.539	0.000708	0.000968
72.572	0.000709	0.000965
72.604	0.00071	0.000962
72.637	0.000711	0.000959
72.67	0.000712	0.000956
72.702	0.000713	0.000953
72.735	0.000714	0.000951
72.768	0.000715	0.000948
72.8	0.000715	0.000945
72.833	0.000716	0.000942
72.866	0.000717	0.000939
72.898	0.000717	0.000936
72.931	0.000718	0.000933
72.963	0.000718	0.000929
72.996	0.000718	0.000926
73.029	0.000719	0.000923
73.061	0.000719	0.00092
73.094	0.000719	0.000917
73.127	0.000719	0.000914
73.159	0.000719	0.000911
73.192	0.000719	0.000908
73.225	0.000719	0.000905
73.257	0.000719	0.000902
73.29	0.000719	0.000899
73.322	0.000719	0.000896
73.355	0.000718	0.000893
73.388	0.000718	0.00089
73.42	0.000718	0.000888
73.453	0.000717	0.000885
73.486	0.000717	0.000882
73.518	0.000716	0.000879
73.551	0.000716	0.000877
73.584	0.000715	0.000874
73.616	0.000715	0.000871
73.649	0.000714	0.000869
73.681	0.000713	0.000866
73.714	0.000713	0.000864
73.747	0.000712	0.000861
73.779	0.000711	0.000859
73.812	0.00071	0.000857
73.845	0.000709	0.000854
73.877	0.000708	0.000852
73.91	0.000707	0.00085
73.943	0.000707	0.000848
73.975	0.000706	0.000846
74.008	0.000705	0.000844
74.04	0.000703	0.000842
74.073	0.000702	0.00084
74.106	0.000701	0.000838
74.138	0.0007	0.000836
74.171	0.000699	0.000834
74.204	0.000698	0.000832
74.236	0.000697	0.00083
74.269	0.000695	0.000829
74.302	0.000694	0.000827
74.334	0.000693	0.000825
74.367	0.000692	0.000824
74.399	0.000691	0.000822
74.432	0.000689	0.000821
74.465	0.000688	0.000819
74.497	0.000687	0.000818
74.53	0.000685	0.000816
74.563	0.000684	0.000815
74.595	0.000683	0.000814
74.628	0.000681	0.000812
74.661	0.00068	0.000811
74.693	0.000679	0.00081
74.726	0.000677	0.000809
74.758	0.000676	0.000807
74.791	0.000675	0.000806
74.824	0.000673	0.000805
74.856	0.000672	0.000804
74.889	0.000671	0.000803
74.922	0.000669	0.000802
74.954	0.000668	0.000801
74.987	0.000667	0.0008
75.02	0.000666	0.000799
75.052	0.000664	0.000798
75.085	0.000663	0.000798
75.117	0.000662	0.000797
75.15	0.000661	0.000796
75.183	0.000659	0.000795
75.215	0.000658	0.000794
75.248	0.000657	0.000794
75.281	0.000656	0.000793
75.313	0.000655	0.000792
75.346	0.000653	0.000792
75.379	0.000652	0.000791
75.411	0.000651	0.000791
75.444	0.00065	0.00079
75.477	0.000649	0.00079
75.509	0.000648	0.000789
75.542	0.000647	0.000789
75.574	0.000645	0.000788
75.607	0.000644	0.000788
75.64	0.000643	0.000788
75.672	0.000642	0.000787
75.705	0.000641	0.000787
75.738	0.00064	0.000787
75.77	0.000639	0.000787
75.803	0.000638	0.000787
75.836	0.000637	0.000787
75.868	0.000635	0.000787
75.901	0.000634	0.000787
75.933	0.000633	0.000788
75.966	0.000632	0.000788
75.999	0.000631	0.000788
76.031	0.00063	0.000789
76.064	0.000629	0.000789
76.097	0.000627	0.00079
76.129	0.000626	0.000791
76.162	0.000625	0.000791
76.195	0.000624	0.000792
76.227	0.000623	0.000793
76.26	0.000621	0.000794
76.292	0.00062	0.000795
76.325	0.000619	0.000797
76.358	0.000618	0.000798
76.39	0.000617	0.0008
76.423	0.000615	0.000801
76.456	0.000614	0.000803
76.488	0.000613	0.000804
76.521	0.000612	0.000806
76.554	0.00061	0.000808
76.586	0.000609	0.00081
76.619	0.000608	0.000813
76.651	0.000607	0.000815
76.684	0.000605	0.000817
76.717	0.000604	0.00082
76.749	0.000603	0.000822
76.782	0.000601	0.000825
76.815	0.0006	0.000827
76.847	0.000599	0.00083
76.88	0.000598	0.000833
76.913	0.000596	0.000836
76.945	0.000595	0.000839
76.978	0.000594	0.000842
77.01	0.000592	0.000845
77.043	0.000591	0.000848
77.076	0.00059	0.000851
77.108	0.000588	0.000855
77.141	0.000587	0.000858
77.174	0.000586	0.000861
77.206	0.000584	0.000865
77.239	0.000583	0.000868
77.272	0.000582	0.000872
77.304	0.00058	0.000875
77.337	0.000579	0.000878
77.369	0.000578	0.000882
77.402	0.000577	0.000885
77.435	0.000575	0.000889
77.467	0.000574	0.000892
77.5	0.000573	0.000896
77.533	0.000572	0.000899
77.565	0.000571	0.000902
77.598	0.000569	0.000906
77.631	0.000568	0.000909
77.663	0.000567	0.000912
77.696	0.000566	0.000916
77.728	0.000565	0.000919
77.761	0.000564	0.000922
77.794	0.000563	0.000925
77.826	0.000562	0.000928
77.859	0.000561	0.000931
77.892	0.00056	0.000934
77.924	0.00056	0.000936
77.957	0.000559	0.000939
77.99	0.000558	0.000941
78.022	0.000557	0.000944
78.055	0.000557	0.000946
78.087	0.000556	0.000948
78.12	0.000556	0.000951
78.153	0.000555	0.000953
78.185	0.000554	0.000954
78.218	0.000554	0.000956
78.251	0.000553	0.000958
78.283	0.000553	0.000959
78.316	0.000553	0.00096
78.349	0.000552	0.000962
78.381	0.000552	0.000963
78.414	0.000551	0.000963
78.446	0.000551	0.000964
78.479	0.000551	0.000964
78.512	0.00055	0.000965
78.544	0.00055	0.000965
78.577	0.00055	0.000965
78.61	0.00055	0.000964
78.642	0.00055	0.000964
78.675	0.000549	0.000963
78.708	0.000549	0.000962
78.74	0.000549	0.000961
78.773	0.000549	0.00096
78.805	0.000549	0.000958
78.838	0.000549	0.000957
78.871	0.000549	0.000955
78.903	0.000549	0.000953
78.936	0.000549	0.00095
78.969	0.00055	0.000948
79.001	0.00055	0.000945
79.034	0.00055	0.000942
79.067	0.00055	0.000939
79.099	0.000551	0.000936
79.132	0.000551	0.000933
79.164	0.000551	0.000929
79.197	0.000552	0.000926
79.23	0.000552	0.000922
79.262	0.000553	0.000918
79.295	0.000553	0.000914
79.328	0.000554	0.000909
79.36	0.000555	0.000905
79.393	0.000555	0.0009
79.426	0.000556	0.000896
79.458	0.000556	0.000891
79.491	0.000557	0.000886
79.523	0.000558	0.000881
79.556	0.000559	0.000877
79.589	0.000559	0.000872
79.621	0.00056	0.000867
79.654	0.000561	0.000861
79.687	0.000562	0.000856
79.719	0.000563	0.000851
79.752	0.000563	0.000846
79.785	0.000564	0.000841
79.817	0.000565	0.000836
79.85	0.000566	0.000831
79.883	0.000567	0.000825
79.915	0.000567	0.00082
79.948	0.000568	0.000815
79.98	0.000569	0.00081
80.013	0.00057	0.000805
80.046	0.000571	0.0008
80.078	0.000571	0.000795
80.111	0.000572	0.00079
80.144	0.000573	0.000786
80.176	0.000574	0.000781
[truncated: 301 more rows]

## Sheet: Fig1-S1-Prometheus overview
Capillary	Sample ID	Excitation Power	Start Temperature	End Temperature	Temperature Slope	Start Time	Duration	Onset #1 for Ratio	Inflection Point #1 for Ratio	Inflection Point #2 for Ratio
1	VPS34-CII WT	0.27	15	90	1	2024-05-16 15:32:35	1:15:00	42.4267	47.885
2	mCherry-VPS34-CII WT	0.27	15	90	1	2024-05-16 15:32:35	1:15:00	42.4255	48.1165
