# Supplementary material for: A novel RAB5 binding site in human VPS34-CII that is likely the primordial site in eukaryotic evolution
Source: eLife. 2026 May 28;15:RP110040. doi: 10.7554/eLife.110040 (PMC13218723; doi:10.7554/eLife.110040)
Supplement: Figure 1—figure supplement 1—source data 2. [file elife-110040-fig1-figsupp1-data2.xlsx]

## Sheet: Fig1-S1D-Raw (CII WT + RAB1A)
Sample	mCherry channel intensity	AF488 channel intensity	AF488 channel background	averaged AF488 channel background	corrected AF488 channel intensity	AF488 channel intensity normalised by mCherry channel intensity
CII WT	105.469	0.04	0.01	0.0113	0.0287	0.000272118
0 µM RAB1A	83.8	0.018	0.007		0.0067	7.99523e-05
	97.601	0.054	0.02		0.0427	0.000437496
	80.513	0.046	0.01		0.0347	0.000430986
	75.706	0.031	0.017		0.0197	0.000260217
	105.486	0.05	0.007		0.0387	0.000366873
	104.71	0.047	0.02		0.0357	0.000340942
	102.366	0.015	0.007		0.0037	3.61448e-05
	85.018	0.028	0.01		0.0167	0.000196429
	103.353	0.034	0.005		0.0227	0.000219636
	69.747	0.024			0.0127	0.000182087
	88.176	0.077			0.0657	0.000745101
	114.885	0.01			-0.0013	-1.13157e-05
	89.063	0.059			0.0477	0.000535576
	66.314	0.039			0.0277	0.00041771
	152.548	0.052			0.0407	0.000266801
CII WT	120.37	9.017	10.657	10.0412	-1.0242	-0.00850876
4 µM RAB1A	100.529	9.378	10.764		-0.6632	-0.0065971
	106.086	9.72	10.079		-0.3212	-0.00302773
	122.973	10.054	9.815		0.0128	0.000104088
	97.525	9.062	9.157		-0.9792	-0.0100405
	110.771	9.285	9.541		-0.7562	-0.0068267
	179.376	9.298	8.977		-0.7432	-0.00414325
	97.003	9.112	9.881		-0.9292	-0.00957909
	104.023	10.084	10.551		0.0428	0.000411447
	69.738	7.94	10.99		-2.1012	-0.0301299
	102.716	7.321			-2.7202	-0.0264827
	66.72	8.429			-1.6122	-0.0241637
	63.815	10.085			0.0438	0.000686359
	71.498	8.839			-1.2022	-0.0168145
	66.712	8.912			-1.1292	-0.0169265
	64.667	8.998			-1.0432	-0.0161319
	65.776	8.426			-1.6152	-0.0245561
	59.478	9.654			-0.3872	-0.00650997
	116.452	10.078			0.0368	0.00031601
CII WT	79.751	37.715	42.868	41.1181	-5.153	-0.0646136
8 µM RAB1A	57.515	37.475	42.927		-5.393	-0.0937668
	114.38	40.286	41.817		-2.582	-0.0225739
	80.291	38.966	42.188		-3.902	-0.0485982
	127.772	41.228	41.612		-1.64	-0.0128354
	91.565	39.1	40.871		-3.768	-0.0411511
	81.753	39.972	39.199		-2.896	-0.0354238
	105.649	36.777	40.843		-6.091	-0.0576532
	52.429	35.956	40.112		-6.912	-0.131835
	60.646	39.213	38.744		-3.655	-0.0602678
	53.43	39.283			-3.585	-0.0670971
	95.117	39.907			-2.961	-0.0311301
	91.653	39.629			-3.239	-0.0353398
	82.146	37.716			-5.152	-0.0627176
	58.972	36.644			-6.224	-0.105542
	65.541	37.114			-5.754	-0.0877924
	50.229	38.251			-4.617	-0.091919
	60.703	37.604			-5.264	-0.0867173
	62.315	38.596			-4.272	-0.0685549
CII WT	109.898	66.033	69.293	66.6049	-0.5719	-0.00520392
12 µM RAB1A	109.404	63.636	68.276		-2.9689	-0.027137
	89.412	60.011	67.679		-6.5939	-0.0737474
	91.28	61.233	67.195		-5.3719	-0.0588508
	145.056	63.968	65.171		-2.6369	-0.0181785
	88.857	63.027	65.962		-3.5779	-0.0402658
	69.263	65.177	66.04		-1.4279	-0.0206156
	82.149	60.034	66.788		-6.5709	-0.0799876
	75.829	64.287	64.326		-2.3179	-0.0305675
	74.154	61.466	65.319		-5.1389	-0.0693004
	80.555	60.641			-5.9639	-0.0740351
	68.728	62.166			-4.4389	-0.0645865
	63.961	63.474			-3.1309	-0.0489501
	69.022	64.27			-2.3349	-0.0338283
	69.174	58.036			-8.5689	-0.123875
	66.211	60.282			-6.3229	-0.0954962
CII WT	91.337	90.525	99.323	96.8295	-6.3045	-0.0690246
16 µM RAB1A	104.249	91.272	96.983		-5.5575	-0.0533099
	110.063	89.749	98.434		-7.0805	-0.0643313
	84.779	90.604	97.196		-6.2255	-0.0734321
	77.318	89.842	95.315		-6.9875	-0.0903735
	93.195	88.417	97.235		-8.4125	-0.0902677
	95.889	87.826	93.986		-9.0035	-0.093895
	66.379	88.751	97.249		-8.0785	-0.121703
	72.777	92.064	97.555		-4.7655	-0.0654809
	81.008	88.987	95.019		-7.8425	-0.0968114
	69.638	87.594			-9.2355	-0.132622
	79.594	85.61			-11.2195	-0.140959
	66.312	89.65			-7.1795	-0.108268
	66.284	88.917			-7.9125	-0.119373
	65.785	92.09			-4.7395	-0.0720453
	61.073	92.739			-4.0905	-0.0669772
	65.367	92.477			-4.3525	-0.0665856
	58.865	86.7			-10.1295	-0.17208
CII WT	82.641	97.293	102.286	102.326	-5.0332	-0.0609044
20 µM RAB1A	82.731	94.72	104.235		-7.6062	-0.0919389
	58.585	100.449	106.982		-1.8772	-0.0320423
	56.086	99.143	104.116		-3.1832	-0.0567557
	43.976	92.635	102.988		-9.6912	-0.220375
	53.228	94.329	106.357		-7.9972	-0.150244
	60.022	99.908	106.134		-2.4182	-0.0402886
	50.813	99.661	101.268		-2.6652	-0.0524511
	93.172	101.534	94.336		-0.7922	-0.00850255
	75.401	93.026	94.56		-9.3002	-0.123343
	51.084	88.496			-13.8302	-0.270734
	57.805	101.262			-1.0642	-0.0184102
	50.897	103.905			1.5788	0.0310195
	51.144	101.113			-1.2132	-0.0237213
CII WT	137.209	152.407	161.053	155.829	-3.4217	-0.0249379
25 µM RAB1A	137.5	155.47	159.788		-0.3587	-0.00260873
	95.821	147.947	153.011		-7.8817	-0.0822544
	93.107	146.836	152.186		-8.9927	-0.0965846
	104.366	149.057	158.874		-6.7717	-0.0648842
	102.222	142.942	155.799		-12.8867	-0.126066
	105.831	151.787	153.686		-4.0417	-0.0381901
	93.399	143.896	149.529		-11.9327	-0.12776
	88.687	145.328	156.082		-10.5007	-0.118402
	73.949	148.514	158.279		-7.3147	-0.0989155

## Sheet: Fig1-S1D-analysis(CII WT+RAB1A)
	Raw data for non-linear fit (one site-specific binding)
	µM RAB1A-AF488
	0	0.00027212	7.9952e-05	0.0004375	0.00043099	0.00026022	0.00036687	0.00034094	3.6145e-05	0.00019643	0.00021964	0.00018209	0.0007451	-1.132e-05	0.00053558	0.00041771	0.0002668				0.0391384	0.0386567
	4	-0.0085088	-0.0065971	-0.0030277	0.00010409*	-0.0100405	-0.0068267	-0.0041433	-0.0095791	0.00041145*	-0.0301299*	-0.0264827*	-0.0241637*	0.00068636*	-0.0168145	-0.0169265	-0.0161319	-0.0245561*	-0.00651	0.00031601*
	8	-0.0646136	-0.0937668*	-0.0225739*	-0.0485982	-0.0128354*	-0.0411511	-0.0354238	-0.0576532	-0.1318354*	-0.0602678	-0.0670971	-0.0311301*	-0.0353398	-0.0627176	-0.1055416*	-0.0877924	-0.091919*	-0.0867173	-0.0685549
	12	-0.0052039*	-0.027137	-0.0737474	-0.0588508	-0.0181785*	-0.0402658	-0.0206156*	-0.0799876*	-0.0305675	-0.0693004	-0.0740351	-0.0645865	-0.0489501	-0.0338283	-0.1238746*	-0.0954962*
	16	-0.0690246	-0.0533099*	-0.0643313*	-0.0734321	-0.0903735	-0.0902677	-0.093895	-0.1217026*	-0.0654809*	-0.0968114	-0.1326216*	-0.1409591*	-0.108269	-0.119373	-0.0720453	-0.0669772	-0.0665856	-0.1720802*
	20	-0.0609044	-0.0919389	-0.0320423	-0.0567557	-0.2203747*	-0.1502442*	-0.0402886	-0.0524511	-0.0085026*	-0.123343	-0.2707345*	-0.0184102*	0.03101951*	-0.0237213
	25	-0.0249379*	-0.0026087*	-0.0822544	-0.0965846	-0.0648842	-0.1260658*	-0.0381901	-0.1277605*	-0.118402	-0.0989155
