# Supplementary material for: A novel RAB5 binding site in human VPS34-CII that is likely the primordial site in eukaryotic evolution
Source: eLife. 2026 May 28;15:RP110040. doi: 10.7554/eLife.110040 (PMC13218723; doi:10.7554/eLife.110040)
Supplement: Figure 1—source data 1. [file elife-110040-fig1-data1.xlsx]

## Sheet: Fig1C-curves
Time, min	100 nM VPS34-CII WT																											100 nM VPS34-CII (VPS34 199-REIE-202 > ERIR)
0	0.05	0.11	0.16	0.08	0.07		0.19	0.12*	0.18*	0.25*	0.19	0.14	0.09*	0.12*	0.28	0.21	0.09	0.18	0.35*	0.3	0.05	0.15	0.1	0.19	0.15	0.23		0.37	0.21		0.22	0.26	0.28	0.22	0.32	0.45	0.38	0.08	0.62	0.11	0.24	0.14	0.2*	0.44	0.13	0.12	0.11	0.1	0.11
2	0.06	0.16	0.19	0.09	0.07		0.17	0.12*	0.22*	0.27*	0.27	0.11	0.12*	0.13*	-0.01	0.47	0.09	0.21	0.48*	0.47	0.06	0.15	0.08	0.08	0.1	0.21	0.16	0.22	0.26	0.18	0.2	0.23	0.22	0.23	0.16	0.8	0.33	0.05	0.56	0.1	0.18	0.09	0.29*	0.17	0.13	0.11	0.08	0.1	0.1
4	0.07	0.14	0.18	0.11	0.11	0.26	0.2	0.15*	0.18*	0.28*	0.28	0.11	0.12*	0.13*		0.43	0.08	0.21	0.57*	0.51	0.1	0.2	0.11	0.08	0.16	0.25	0.16	0.24	0.24	0.15	0.17	0.22	0.28	0.18	0.3	0.39	0.36	0.08	0.61	0.14	0.39	0.08	0.24*	0.17	0.13	0.12	0.1	0.09	0.15
6	0.11	0.16	0.19	0.12	0.11	0.32	0.19	0.17*	0.23*	0.43*	0.42	0.13	0.14*	0.14*	0.31	0.53	0.06	0.21	0.69*	0.52	0.07	0.2	0.11	0.12	0.11	0.26	0.14	0.21	0.25	0.17	0.27	0.26	0.32	0.24	0.15	0.8	0.29	0.07	0.34	0.12	0.18	0.11	0.31*	0.18	0.16	0.11	0.11	0.14	0.1
8	0.13	0.17	0.21	0.06	0.08	0.46	0.16	0.18*	0.17*	0.52*	0.15	0.1	0.12*	0.16*	0.48	0.39	0.05	0.24	0.75*	0.32	0.05	0.21	0.07	0.09	0.21	0.2	0.27	0.2	0.23	0.15	0.23	0.26	0.2	0.16	0.17	0.5	0.31	0.07	0.24	0.15	0.28	0.09	0.26*	0.18	0.1	0.14	0.09	0.11	0.11
10	0.18	0.28	0.21	0.07	0.11	0.48	0.21	0.18*	0.19*	0.47*	0.27	0.11	0.15*	0.14*	2.98*	0.68	0.08	0.26	0.74*	0.52	0.07	0.29	0.09	0.14	0.12	0.17	0.17	0.24	0.28	0.16	0.27	0.24	0.24	-0.01	0.19	0.19	0.32	0.09	0.56	0.12	0.27	0.11	0.3*	0.18	0.13	0.11	0.12	0.13	0.13
12	0.09	0.3	0.2	0.02	0.01	0.51	0.11	0.16*	0.09*	0.4*	0.14	0.1	0.14*	0.17*	4.14*	0.67	0.07	0.24	0.88*	0.44	0.08	0.39	0.06	0.09	0.12	0.2	0.29	0.19	0.23	0.11	0.2	0.29	0.23	0.1	0.19	0.26	0.24	0.07	0.25	0.14	0.15	0.11	0.24*	0.16	0.12	0.11	0.14	0.08	0.13
14	-0.1	0.28	0.11	-0.16	-0.06	0.47	-0.08	-0.01*	-0.04*	0.21*	0.08	0.1	0.12*	0.11*	1.87*	0.67	0.01	0.23	0.91*	0.31	0.02	0.34	0.07	0.06	0.22	0.26	0.28	0.23	0.19	0.18	0.31	0.28	0.23	0.16	0.29	0.49	0.37	0.1	0.72	0.17	0.21	0.1	0.34*	0.2	0.16	0.12	0.12	0.11	0.14
16	-0.34	0.11	-0.13	-0.35	-0.38	0.73	-0.42	-0.34*	-0.38*	-0.06*	-0.36	0.11	0.08*	0.03*	0.82*	1.15	-0.08	0.17	0.94*	0.38	-0.07	0.43	-0.02	0.1	0.05	0.37	0.21	0.22	0.26	0.14	0.28	0.32	0.21	0.22		0.51	0.33	0.09	0.28	0.1	0.12	0.13	0.18*	0.35	0.15	0.12	0.14	0.13	0.18
18	-0.8	0.04	-0.47	-0.82	-0.73	0.56	-0.92	-1*	-0.85*	-0.47*	-0.74	-0.03	-0.02*	-0.1*	0.17	1.09	-0.19	0.19	1*	0.03	-0.19	0.33	-0.18	-0.21	-0.09	0.13	0.24	0.27	0.29	0.21	0.23	0.47	0.3	0.3	0.25	0.3	0.4	0.12	0.56	0.17	0.31	0.14	0.34*	0.27	0.16	0.39	0.13	0.07	0.17
20	-1.28	-0.6	-0.94	-1.23	-1.05	0.29	-1.58	-1.34*	-1.38*	-0.88*	-1.2	-0.15	-0.07*	-0.26*	-0.05	0.32	-0.39	0.01	0.94*	-0.22	-0.58	0.12	-0.32	-0.57	-0.32	0.05	0.09	0.23	0.21	0.24	0.18	0.54	0.17	0.14	0.14		0.37	0.06	0.48	0.06	0.19	0.19	0.19*	0.12	0.14	0.11	-0.13	-0.01	0
22	-1.89	-0.83	-1.47	-1.75	-1.46	-0.21	-2.21	-2.28*	-1.97*	-2.02*	-1.9	-0.26	-0.36*	-0.67*	1.05	0.85	-0.7	-0.17	0.5*	-0.51	-0.61	-0.04	-0.64	-0.55	-0.53	-0.13	0.16	0.08	0.07	0.16	-0.05	0.45	-0.03	-0.2	-0.01	0.37	0.21	0.07	0.2	-0.06	0.11	0.05	0.22*	0	0.18	0.09	-0.43	-0.16	-0.13
24	-2.27	-1.28	-1.77	-2.48	-2.26	-0.55	-2.83	-2.83*	-2.66*	-2.42*	-2.49	-0.59	-0.54*	-0.75*	4.96*	-0.38	-1.03	-0.39	0.12*	-0.94	-1.06	-0.44	-0.97	-1.14	-1	-0.4	-0.21	-0.13	-0.22	-0.02	-0.24	0.44	-0.3	-0.27	-0.22	-0.01	0.27	-0.23	-0.2	-0.28	-0.02	-0.1	0.17*	0	-0.14	-0.08	-0.76	-0.52	-0.41
26	-3.11	-2.08	-2.52	-2.96	-2.41	-1.35	-4.05	-3.92*	-3.5*	-2.86*	-3.07	-0.84	-0.72*	-1.44*	-0.15	-0.01	-1.15	-0.65	-0.46*	-1.35	-1.33	-0.74	-1.31	-1.51	-1.19	-0.6	-0.43	-0.41	-0.49	-0.24	-0.59	0.35	-0.76	-0.85	-0.27	0.1	-0.41	-0.53	-0.44	-0.51	-0.43	-0.31	-0.15*	-0.75	-0.39	-0.37	-1.14	-0.82	-0.73
28	-3.29	-2.58	-2.87	-3.45	-3.7	-1.96	-4.16	-4.69*	-4.12*	-3.14*	-3.5	-1.1	-1.31*	-1.38*	-0.48	-0.14	-1.83	-0.94	-0.88*	-2.14	-1.89	-1.07	-1.75	-2.02	-1.84	-0.66	-0.81	-0.83	-0.97	-0.61	-0.84	0.01	-0.87	-1.07	-0.63	-0.9	-0.5	-0.82	-0.92	-0.79	-0.67	-0.56	-0.74*	-0.87	-0.63	-0.46	-2.38	-1.16	-0.9
30	-4.59	-3.61	-3.25	-4.11	-3.88	-2.16	-5.5	-5.8*	-4.68*	-4.14*	-4.65	-1.61	-1.52*	-2.46*	-0.47	0.33*	-2.59	-1.47	-1.05*	-3.2	-2.45	-1.85	-2.46	-2.64	-2.25	-2.07	-0.88	-1.15	-1.37	-0.87	-0.94	-0.19	-1.67	-1.62	-1.66	-0.64	-0.94	-1.5	-1.42	-1.44	-0.94	-0.83	-1.43*	-0.77	-1.07	-0.78	-2.08	-1.61	-1.19
32	-5.11	-3.71	-3.97	-4.43	-4.11	-3.12	-5.35	-6.33*	-5.51*	-5.11*	-5.41	-2.09	-2.13*	-4.21*	-0.95	0.96*	-3.18	-2.33	-1.96*	-4.16	-3.51	-2.15	-3.28	-3.41	-3.11	-2.3	-1.43	-1.42	-1.88	-1.34	-1.65	-0.55	-1.91	-2.26	-1.81	-0.83	-1.52	-1.82	-2.01	-1.89	-1.39	-1.21	-1.42*	-1.58	-1.33	-1.11	-3.35	-2.01	-1.45
34	-5.74	-4.42	-4.43	-5.48	-5.23	-3.41	-6.98	-7.88*	-6.08*	-5.42*	-5.73	-2.52	-2.69*	-3.21*	-2.03	1.89*	-3.63	-2.52	-2.57*	-4.59	-3.99	-2.4	-3.56	-4.55	-3.18		-2.51	-1.94	-2.12	-1.58	-1.87	-0.93	-2.25	-2.62	-1.98	-1.89	-1.74	-1.88	-2.36	-2.32	-1.72	-1.37	-1.67*	-1.38	-1.44	-0.86	-3.78	-2.32	-1.72
36	-7.63	-5.82	-5.33	-6.02	-5.84	-4.07	-7.61	-8.58*	-7.5*	-7.1*	-5.82	-3.29	-3.31*	-3.58*	-1.48	1.67*	-4.61	-2.99	-3.13*	-5.15	-4.62	-3.09	-4.43	-5.56	-4.91	-4.38	-2.7	-2.27	-2.59	-1.94	-2.61	-0.95	-2.57	-3.48	-2.82	-1.85	-1.9	-2.36	-2.72	-2.69	-2.23	-1.79	-2.24*	-2.33	-1.66	-1.5	-3.15	-2.73	-1.87
38	-7.89	-6.5	-6.3	-6.7	-6.33	-4.71	-8.9	-9.59*	-7.89*	-5.33*	-6.44	-3.97	-3.97*	-7.07*	-2.81	-1.02*	-5.47	-3.44	-3.03*	-6.47	-5.61	-4.39	-5.13	-5.66	-5.49	-5.01	-2.95	-2.59	-2.9	-2.06	-2.53	-1.52	-2.89	-4.2	-2.88	-2.05	-2.61	-2.64	-2.91	-3.66	-2.08	-2.01	-1.64*	-3.28	-2.01	-1.55	-3.57	-2.88	-2.08
40	-7.78	-6.86	-6.15	-7.39	-6.98	-5.41	-8.64	-10.61*	-8.49*	-7.02*	-7.45	-4.58	-4.34*	-5.67*	-3.55	-1.42*	-6.39	-4.39	-4.26*	-7.64	-6.36	-5.15	-5.82	-6.71	-6.61	-4.75	-3.54	-2.72	-3	-2.56	-3.33	-1.59	-3.29	-3.56	-3.25	-2.25	-2.66	-2.83	-3.2	-3.92	-2.69	-2.22	-3.16*	-3.31	-2.14	-1.57	-4.32	-3.67	-1.85
42	-7.88	-7.56	-7.5	-7.93	-6.36	-5.96	-9.43	-10.93*	-9.57*	-8.16*	-7.37	-5.53	-4.55*	-10.15*	-4.65	0.7*	-7.7	-5.14	-5.36*	-8.94	-7.16	-4.43	-7.82	-7.75	-7.68	-6.5	-3.84	-3.16	-3.56	-2.87	-4.09	-1.93	-3.86	-5.25	-3.69	-1.23	-3.23	-2.81	-3.72	-3.84	-3.05	-2.99	-2.73*	-3.33	-2.37	-1.73	-3.82	-4	-2.53
44	-9.61	-9.15	-7.61	-9.01	-6.99	-5.85	-10.29	-11.39*	-9.75*	-8.79*	-7.87	-6.96	-5.62*	-12.67*	-5.41	-2.43*	-8.77	-6.4	-5.21*	-9.47	-8.13	-5.33	-8.14	-9.13	-8.15	-6.45	-4.87	-3.35	-4.25	-2.57	-4.06	-2.07	-4	-5.69	-3.87	-2.88	-2.97	-3.18	-4.24	-4.39	-3.24	-3.82	-3.08*	-3.98	-2.93	-1.46	-4.29	-4.16	-2.6
46	-8.8	-8.67	-8.22	-7.7	-7.36	-5.94	-10.55	-11.84*	-10.17*	-7.4*	-5.61	-7.96	-5.32*	-9.96*	-7.03	-5.64	-9.77	-6.91	-5.47*	-11.04	-8.69	-6.52	-9.33	-11.82	-9.44	-7.15	-4.96	-3.56	-4.71	-3.55	-4.88	-2.88	-4.43	-4.07	-5.21	-2.54	-3.63	-3.37	-3.71	-5.35	-4.16	-3.28	-3.97*	-5.57	-2.82	-1.76	-5.46	-4.47	-2.79
48	-8.92	-8.99	-7.73	-9.2	-7.25	-6.43	-9.18	-12.44*	-10.52*	-8*	-4.73	-8.86	-5.46*	-18.75*	-7.35	-5.24	-9.35	-8.33	-5.49*	-10.86	-9.43	-7	-9.96	-9.96	-9.41	-7.8	-5.24	-4.15	-5.38	-4.08	-5.32	-3	-4.74	-5.11	-5.38	-2.01	-4.87	-3.6	-6.66	10.71*	-3.79	-3.69	-3.79*	-4.47	-3.36	-0.95	-4.8	-5.25	-3.56
50	-11.55	-9.31	-8.41	-7.74	-7.5	-6.18	-9.99	-13.26*	-10.45*	-8.07*	-6.01	-9.68	-5.31*	-14.83*	-5.96	-8.1	-9.77	-7.69	-5.32*	-10.75	-9.48	-7.4	-10.34	-10.39	-10.6	-9.81	-5.79	-5.31	-6.43	4.56*	-6.15	-4.26	-6.24	-5.98	-6.46	-3.53	-6.05	-4.83	-7.71	-6.81	-4.85	-7.31	-5.49*	-7.53	-4.38	-2.39	-7.24	-6.72	-5.2
52	-9.6	-8.24	-7.96	-6.56	-6.85	-5.89	-8.36	-12.41*	-10.01*	-6.72*	-5.69	-9.05	-2.29*	-17.2*	-5.91	-4.72	-6.94	-7.06	-3.13*	-9.69	-7.57	-6.91	-8.78	-8.17	-8.47	-8.38	-5.27	-8.85	-11.27	-8.63	-10.87	-8.23	-10.43	-8.63	-10.89	-6	-9.73	-7.23	-11.85	-11	-9.99	-13.02	-9.56*	-13.23	-7.4	-4.64	-16.01*	-10.29	-8.19
54	-6.01	-4.5	-4.89	-3.03	-3.35	-5.29	-7.38	-9.59*	-6.39*	-5.16*	-4.24	-8.02	0.23*	-11.43*	-4.56	-4.19	-8.33	-4.2	-0.35*	-6.77	-5.99	-5.3	-8	-8.06	-7.2	-7.27	-4.68	-8.13	-12.84	-11.2	-13.6	-9.34	-10.76	-14.49	-11.58	-6.46	-11.35	-9.2	-12.5	-13.79	-10.12	-14.04	-12.44*	-19.02*	-8.83	-4.64	-12.32	-10.38	-8.83
56	-2.09	-1.65	-1.45	0.25	-0.2	-3.62	-1.78	-5.01*	-3.06*	-1.01*	-0.22	-6.73	2.09*	-15.18*	-4.29	-5.17	-6.01	-4.32	0.72*	-5.7	-5.44	-4.09	-8.04*	-3.84	-7.13	-4.35	-3.23	-4.9	-6.93	-4.82	-5.62	-2.73	-6.44	-5.33	-6.42	4.78*	-6.51	-5.95	-6.65	-9.79	-5.39	-6.05	-7.15*	-9.42*	-4.83	-1.77	-5.58	-5.78	-3.4
58	-2.05	-0.53	-1.75	0.89	0.3	-0.51	-0.84	-4.93*	-2.4*	-0.44*	1.12	-6.35	2.45*	-15.16*	-4.13	-1.86	-6.29	-4.66	2.17*	-5.05	-4.68	-3.78	-7.87*	-4.76	-6.66	-5.14	-2.87	-3.19	-6.24	-4.78	-2.32	-2.73	-4.06	-4.65	-4.86	-0.62	-4.38	-3.27	-4.34	-6.15	-4.08	-5.52	-5.86*	-10.27*	-3.55	0.42	-2.74	-5.45	-2.41
60	-2.33	-0.99	-1.52	1.54	0.13	2.42	-1.02	-5.23*	-3.32*	-0.26*	1.38	-3.45	5.99*	-6.62*	-1.27	-3.17	-5.27	-3.01	3.83*	-3.65	-2.76	-1	-4.92	-2.2	-4.41	-1.34	-1.54	-2.71	-5.78	-3.7	-3.36	-2.49	-3.48	-4.3		-1.83	-3.63	-3.22	-5.62	-6.44	-3.47	-5.04	-5.09*	-4.37	-3.5	1.16	-4.72	-5.11	-1.98
62	-3.49	-1.03	-2.28	0.87	-0.44	2.59	-1.2	-5.44*	-0.41*		0.96	-2.78	7.04*	-4.95*	0.6	-0.5	-1.77	-1.91	6.09*	-0.93	-0.61	0.12	-3.66	0.5	-3.41	-0.83	-0.5	-0.75	-6.36	-3.27	-2.65	-2.46	-3.89	-4.74	-4.83	1.7	-3.33	-3.11	-4.5	0.31	-2.91	-3.99	-5.69*	-5.77	-2.89	2.45	-2.74	-5.82	-1.75
64	-1.7	-0.52	-0.84	1.46	-0.02	2.97	-0.08	-4.29*	-4.26*	-4.56*	2.6	-2.85	7.8*	-10.53*	2.84	-2.38	-2.36	-0.13	6.7*	-0.43	0.34	0.72	-2.55	3.1	-1.72	0.33	2.22	0.35	-5.71	-3.99	-0.71	-1.81	-4.61	-3.92	-5.52	0.1	-3.13	-3.29	-2.78	-6.69	-2.64	-4.26	-5.54*	-4.96	-2.86	1.64	-4.78	-5.43	-2.18
66	0.37	0.14	-0.66	2.48	0.31	3.15	-0.19	-4.37*	-3.12*	-5.43*	2.45	-2.14	10.58*	-8.22*	5.2*	1.88	0.19	0.81	7.61*	0.38	0.66	1.22	-3.1	1.41	-2.41	0.46	2.84	-1.55	-5.46	-3.38	0.27	-1.44	-4.03	-5.99	-5.77	-2.42	-2.79	-4.4	-4.94	-7.27	-2.19	-3.77	-7.88*	-3.83	-2.9	2.29	-1.75	-5.65	-1.5
68	-1.76	1.22	-0.64	2.57	1.63	4.27	-0.36	-4.75*	-2.78*	-5.36*	4.46	-1.49	8.96*	-10.32*	3.28	-3.62*	-0.35	1.23	7.72*	-0.25	1.31	3.77	-2.24	3.03	-0.23	2.73	4.22	-0.29	-5.98	-2.48	1.38	-1.01	-3.42	-3.73*		-1.26	-1.89	-2.22	-2.46	-6.52	0.41	-3.56	-6.82*	-2.13	-2	3.8	-2.2	-3.57	-0.49
70	-0.93	1	-1.4	2.3	1.62	4.77	0.73	-4.22*	-2.16*	-4.67*	4.55	-1.65	10.06*	-10.16*	3.18	-2.22	2.33	1.44	8.85*	1.78	1.75	3.19	-0.53	3.06	-0.07	1.23	5.05	1.64	-5.07	-3.12	1.3	-2.1	-1.84	-2.42*	-2.91		0.05	-1.19	-0.08	-5.34	-0.21	-3.28	-5.99*	-0.58	-2.52	4.67	-1.33	-4.17	0.01
72	-0.14	1.89	0.26	3.42	1.36	4.85	1.27	-3.47*	-2.32*	-7.2*	3.86	-2.34	11.92*	-9.43*	4.29	3.35	0.48	3.36	8.54*	0.55	1.41	2.81	-1.72	4.2	-0.62	2	4.91	1.99	-4.75	-3.39	3.08	-0.61	-1.79	-2.26*	-2.51	5.02	0.68	-0.25	-1.2	-4.18	-0.54	-2.2	-5.64*	-0.47	-1.59	5.05	-1.76	-3.42	0.87
74	0.39	2.62	0.78	5.57	3.01	6.49	0.6	-3.49*	2.21*	-7.14*	7.49	-0.33	11.73*	-11.01*	4.14	3.71	1.45	3.37	10.91*	4.42	1.52	3.93	1.03	2.83	1.85	1.1	5.67	1.89	-4.84	-2.4	3.67	-0.3	-0.86	-5.15*	-2.43	5.26	1.4	0.68	1.21	-3.38	1.03	-1.7	-5.31*	0.34	-0.79	6.49	0.3	-3.99	0.56
76	1.93	4.04	0.9	5.27	3.04	7.46	1.33	-3.26*	-2.19*	-3.05*	5.3	-0.32	13.62*	-8.86*	5.24	5.24	1.68	3	10.16*	3.52	1.46	6.09	-1.15	4.48	0.63	0.72	7.57	1.55	-5.8	-4.06	4.11	-1.2	-1.16	-6.67*	-3.88	6.83	0.57	-1.33	4.5	-6.3	2.95	-3.44	-7.7*	-1.43	-1.71	4.57	1.01	-0.59	0.28
78	0.8	4.38	1.17	4.62	3.19	7.96	3.49	-2.55*	0.68*	-2.6*	7.69	-0.06	12.79*	-9.29*	5.36	6.18	1.36	3.77	10.86*	5.37	3.2	5.49	0.58	5.16	1.21	2.51	7.19	2.87	-4.64	-2.18	4.83	0.45	-0.91	-6.51*	-1.38	6.95	2.37	0.91	5.15	-4.29	5.25	-2.76	-6.16*	1.44	-0.19	6.27	0.24	-3.22	1.97
80	2.5	5.12	1.22	8.17	5.94	6.57	3.8	-2.29*	-0.71*	-2.35*	9.9*	0.49*	13.09*	-3.7*	6.23	6.38	4.75	2.96	12.72*	7.35	3.49	5.9	0.03	5.35	2.72	7.48	7.55	2.6	-4.13	-2.11	6.83	1.13	-0.33	-0.77*	-0.52	9.33	2.38	0.9	-3.97*	-4.53	2.76	0.32	-5.35*	1.33	0.25	7.4	1.47	-1.13	2.43
82	3.2	6.63	1.59	7.69	3.3	7.34	5.08	-3.25*	-0.99*	-2.24*	7.72	-1.24*	13.33*	-6.42*	4.86	5.55	2.29	3.9	11.88*	6.99	3.37	6.43	-0.21	3.7	1.13	1.89	9.7	4.97	-3.64	-1.33	8.32	2.13	0.65	0.72*	-0.56	8.52	3.2	1.6	7.26	-1.96	3.05	-0.36	-4.5*	2.05	1.18	7.55	2.31	-1.88	3.42
84	3.8	7.7	2.11	9.01	3.63	7.95	5.06	-2.01*	3.78*	-0.68*	7.06	0.33*	13.66*	-1.4*	5.92	7.25	5.16	4.37	14.12*	7.28	4.45	11.02	0.77	4.01	1.22	2.93	8.33	4.86	-3.74	-1.5	8.36	2.25	1.7	1.13	0.16		3.85	3.39	1.35	-3.25	3.21	-0.4	-3.82*	1	1.83	8.71	2.19	-1.72	3.69
86	5.51	8.47	2.48	8.7	5.3	7.62	5.05	-1.62*	-1.14*	2.23*	8.76	0.34*	14.59*	-0.3*	6.97	6.76	4.11	3.34	13.67*	7.2	5.17	7.96	2.03	8.02	7.15	3.05	10.08	5.68	-3.27	0.76	9.63	3.01	2.56	1.04		10.08	5.94	3.09	8.64	-2.64	1.85	1.05	-4.35*	4.4	2.28	8.95	3.36	-0.32	4.76
88	5.06	9.89	3.89	9.09	5.51	8	4.42	-2.32*	-0.77*	0.01*	9.88	1.04*	14.5*	-8.82*	11.5	8.37	4.49	5.4	14.5*	5.83	4.2	7.4	2.45	8.23	3.08	3.89	10.6	6.15	-2.84	-0.7	11.13	3.63	3.35	1.71	0.01	10.71	8.17	4.96	11.77*	-1.9	5.29	0.96	-3.71*	4.49	2.29	9.42	4.03	-0.01	5.32
90	4.88	10.65*	3.74	9.59	5.25	11.07	5.22	-1.32*	0.68*	0.4*	11.2*	0.67*	14.85*	-5.77*	13.29	6.45	4.73	6.48	17.04*	8.49	5.41	7.34	2.13	7.08	5.65	4.52	12.1	9.72	-1.85	-1.14	13.19*	4.17	3.67	2.07	1.47	14.12*	6.96	5.01	14.75*	-1.84		1.2	-5.49*	5.3	2.79	11.22	3.79	0.75	5.51
92	5.25	13.04*	5.46	9.42	7.17	10.25	6.01	-0.43*	0.73*	3.32*	13.63*	0.72*	15.26*	-11.2*	11.03	8.03	5.72	7.76	15.86*	15.99*	5.45	11.79	2.44	8.05	3.58	4.01	10.19	9.02	-1.94	0.42	13.95*	5.24	4.25	2.82	0.94	15.51*	7.12	5.38	6.92*	0.91	5.63	2.28	-5.03*	5.92	2.99	10.48	4.1	0.44	6.51
94	6.83	14.57*	4.28	10.67	5.45	12.17	7.7	-0.25*	0.23*	4.56*	13.9*	2.49	16.04*	-0.04*	12.38	10.69	5.61	5.93	16.9*	18.7*	6.45	9.38	3.43	9.38	6.91	4.3	11.17	8.28	-1.38	0	16.41*	4.73	5.15	1.67*	1.73		8.92	4.97	17.35*	-0.88	6.07	2.25	-4.92*	6.68	4.15	10.99	5.3	0.92	7.64
96	5.56	15.98*	5.39	9.84	7.22	11.73	8.08	-0.05*	0.5*	4.59*	17.58*	3.24	17.14*	-1.63*	12.15	10.35	5.79	5.95	17.63*	13.31*	7.13	10.95	3.74	7.86	6.19	5.28	12.91	8.38	-1.59	-0.05	14.94*	6.24	5.63	-2.97*	1.08	13.85*	12.05*	7.68	18.28*	-0.8	6.58	-0.32	-4.43*	6.93	3.35	10.92	5.51	2.12	7.95
98	6.13	17.11*	6.06	11.23	8.83	11.95	6.86	0.27*	0.6*	4.85*	16.98*	2.91*	16.89*	-1.32*	12.93	11.44	7.16	5.05	18.06*	19.15*	7.56	10.58	3.58	9.17	6.72	5.14	15.13*	10.18	-1.57	1.39	17.98*	6.03	6.33	-4*	2.59	10.73*	17.89*	7.86	6.16*	0.51	9.24	3.11	-4.33*	6.83	3.94	11.83	5.24	1.02	8.56
100	8.28	18.44*	6.33	12.27	8.35	12.17	8.95	0.4*	2.63*	-1.59*		2.92*	18.41*	3.32*	14.49	12.49	6.32	6.63	22.19*	18.53*	7.19	13	4.63	10.69	5.86	4.71	18.13*	11.33	-0.76	0.81	18.39*	6.54	7.69	4.6*	5.66	19.24*	13.57*	8.76	18.64*	-1.98	9.69	3.83	-3.77*	9.15	3.25	11.29	7.51	3.17	8.33
102	9.03	18.99*	6.19	12.84	7.3	12.44	9.82	0.51*	1.9*	0.43*	7.93	2.47*	19.48*	2.23*	14.84	15.6	7.09	7.77	20.69*	26.55*	8.05	13.77	7.61	8.59	9.21	9.11	14.92*	10.61	-1.86	1.49	20*	9	8.56	4.9	3.72	21.63*	14.05*	8.12	19.9*	0.64	11.13	4.52	-2.67*	9.24	3.37	12.21	7.22	4.06	8.5
104	8.69	19.86*	6.15	13.09	8.03	15.57*	8.74	0.93*	1.99*	1.63*	10.68	4.28*	18.97*	3.77*	20.51*	14.32	7.07	8.39	22.48*	26*	8.57	12.83	5.37	14.32	8.3	4.97	14	12.43	-0.92	0.55	20.92*	9.88	8.67	5.76	5.43	20.66*	16.44*	9.66	23.33*	1.05	10.95	3.15	-1.99*	10.75	4.69	13.89	8.41	4.61	10.58
106	10.19	22.06*	7.02	13.65	8.73	13.22	11	0.57*	3.24*	0.16*	8.39	3.78*	19.54*	0.82*	17.33*	12.41	8.36	6.77	24.39*	23.91*	8.46	12.35	4.37	9.62	5.71	5.71	15.37	12.55	0.71	0.92	23.88*	8.35	9.81		4.51	24.1*	18.18*	10.04	14.55*	2	13.02	4.27	-3.03*	11.95	4.3	13.18	8.39	4.48	10.93
108	11.83	22.19*	7.97	14.37	9.66	13.11	11.57	0.32*	2.54*	2.77*	7.68	4.03*	19.47*	1.14*	24.57*	13.63	8.21	7.5	22.27*	14.17*	10.1	13.45	4.55	9.4	8.81	6.74	16.56	12.41	1.14	1.36	24.56*	10.98	10.06	5.89	4.36	23.77*	20.08*	9.36	25.51*	5.44	14.1	5.71	-3.93*	12.39	4.96	14.77	11.09	5.49	11.18
110	12.29	23.54*	7.59	14.55	9.97	14.13	12.5	0.23*	3.15*	0.93*	11.97	3.95*	20.02*	5.37*	22.82*	14.63	8.8	8.24	24.29*	20.18*	8.72	14.68	6.8	12	9.68	8.74	16.07	13.74	-0.33	2.34	26.53*	11.03	9.88	6.36	5.99	24.74*	20.05*	10.11	17.91*	3.3	13.83		-3.46*	11.5	6.03	13.88	11.93	7.13	10.95
112	9.55	24.8*	8.43	15.64	9.52	15.84	11.6	1.26*	3.64*	-0.67*		3.4*	20.91*	-2.57*	26.74*	15.34	9	9.23	18.43*	17.71*	10.22	18.74	5.76	12.46	13.42	7.56	16.24	12.1	0.74	2.62	25.83*	10.61	10.74	1.02	6.43		22.62*	9.18	19.59*	1.1	13.52	4.9	-3.21*	12.9	6.03	14.91	11.14	6.52	12.56
114	11.31	24.96*	8.43	16.29	10.02	13.94	12.05	0.9*	5.02*	2.48*	11.74	4.38*	21.01*	-2.49*	19.67*	11.45	8.73	8.57	22.81*	33.1*	10	18.04	7.67	11.72	13.64	8.71	16.98	16.51	-0.67	3.04	26.8*	9.98	12.43	1.5	3.98	49.02*	24.06*	9.87	20.68*	-0.44	15.11	5.84	-3.57*	12.45	5.81	15.73	14.83	7.57	12.53
116	13.79	25.5*	8.26	17.04	11.09	15.2	13.75	2.27*	5.36*	4.1*		5.47*	20.87*	7.1*	24.81*	14.9	10	9.32	21.19*	23.72*	11.39	17.21	7.19	11.05	11.81	7.12	18.28	16.94	2.1	5.56	29.63*	12.13	14.03	7.4	6.89	24.97*	25.2*	11.58	26.89*	1.47	15.85	9.08	-0.73*	13.69	5.19	17.28	13.61	7.99	14.44
118	13.38	23.58*	8.07	17.68	9.78	17.18	14.12	1.96*	4.63*	2.01*	11.67	3.62*	21.28*	-2.59*	19.46*	11.98	10.14	9.33	24.74*	22.28*	10.33	14.15	7.2	10.35	10.21	10.49	19.86	15.8	2.32	6.13	30.66*	15.99	13.52	8.57	7.02	58.59*	23.67*	11.95	18.53*	2.06	15.64	7.67	-0.72*	14.26	5.96	16.28	13.74	9.3	13.73
120	14.97	26.93*	8.37	17.38	9.02	17.08	13.72	1.26*	4.75*	4.23*		3.96*	21.35*	-2.98*	22.18*	15.85	10.06	9.35	22.19*	26.85*	11.1	17.56	7.66	12.64	13	8.08	20.63	22.09*	3.46	5.56	31.82*	13.1	13.96	12.42*	7.91	48.45*	27.85*	11.85	26.34*	4.83	15.78	3.97	-0.57*	15.26	5.9	16.41	14.47	10.45	14.36
122	13.4	27.51*	10.3	21.2*	11.14	18.01	14.62	3.54*	6.31*	5.77*		4.5*	21.62*	1.04*	21.03*	13.32	11.45	9.68	30.93*	19.83*	10.6	18.33	7.58	12.92	12.06	8.34	21.25	23.77*	3.16	6.7	34.15*	13.04	14.15	9.5	9.24	44.1*	27.02*	12.9	25.98*	2.33	19.25	7.71	-1.2*	14.91	8.45	18.65	13.6	9.99	15.14
124	15.54	28.75*	9.7	17.51	11.39	17.13	15.14	2.05*	4.98*	4.36*	12.81	4.13*	20.74*	0.94*	26.37*	15.84	10.57	10.86	32.26*	27.83*	12.54	17.11	6.89	13.53	16.71	9.44	21.64	17.65*	4.01	5.86	37.29*	13.39	14.38	2.28	8.97	29.25*	26.33*	13.47	22.27*	2.05	16.82	9.13	-0.16*	15.19	7.09	16.91	15.33	10.34	14.2
126	15.9	28.29*	8.92	18.56	10.95	18.97	14.54	1.16*	5.26*	2.5*	10.22	4.23*	20.85*	0.72*	24.84*	14.99	10.43	12.15	25.28*	44.98*	12.14	18.09	8.27	14.81	13.47	7.94	23.62*	22.93*	3.79	7.75	35.93*	12.97	18.09	-2.1*	10.08		25.58*	14.85	32.98*	1.58	18.49	9.35	0.92*	16.13	8.39	18.13	15.12	10.05	14.89
128	15.39	27.5*	10.19	17.44	11.07	18.21	15.98	-0.9*	6.15*	2.11*	15.29	3.58*	22.44*	-0.08*	30.1*	14.81	9.6	12.36	26.6*	23.37*	11.79	20.68	8.49	13.36	12.98	8.79	24.25*	19.31*	4.48	8.68	37.56*	12.67	17.11	5.78	9.1		25.74*	15.33	12.28*	8.12	17.52	11.41	0.46*	17.08	7.35	17.17	20.22	10.77	16.54
130	17.2	29.63*	9.79	19.55	12.34	19.24	16.29	3.55*	6.95*	4.87*	13.5	5.43*	22.49*	0.92*	22.53*	16.25	10.86	10.15	29.32*	34.28*	12.82	17.38	8.83	13.31	15.77	9.25	23.46*	22.09*	3.8	8.37	40.13*	15.23	16.18	9.95	8.35	26.17*	29.51*	15.34	33.45*	4.17	18.94	7.61	3.43*	17.63	7.21	16.86	16.88	10.79	15.49
132	16.75	30.81*	10.56	23.58*	12.41	19.37	13.05	2.94*	9.9*	4.74*	17.52	4.89*	23.58*	4.28*	26.83*	16.22	10.49	10.6	25.11*	29.39*	12.03	22.05	8.49	16.38	12.79	8.9	23.91*	20.31*	4.55	7.17	42.27*	13.16	18.17	10.72	9.35	32.98*	26.82*	15.35	27.4*	6.32	19.27	9.39	1.2*	17.85	7.83	19.51	21	12.38	17.86
134	16.15	29.32*	11.34	20.88	10.94	19.67	13.99	3.48*	5.71*	4.58*		17.64*	22.33*	0.82*	26.99*	18.84	10.5	9.74	27.85*	25.66*	14.31	17.29	9.69	18.57	14.24	8.82	24.15*	19.94*	4.69	7.99	44.41*	15.02	16.09	11.06	11.09	54.01*	29.73*	14.98	29.58*	5.01	17.86	10.92	1.6*	17.57	9.3	19.51	18.19	11.27	25.16*
136	19.32	30.01*	9.84	20.38	10.99	19.9	17.09	3.36*	9.49*	2.79*	18.06	4.75*	24.59*	3.32*	26.68*	16.7	11.46	12.38	24.71*	43.59*	13.06	21.72	9.04	15.91	11.18	9.66	21.76*	22.17*	3.67	7.51	42.57*	16.5	16.84	11.6	9.16	41.58*	32.06*	14.69	29.76*	5.01	19.95	11.45	2.36*	15.31	8.58	17.96	20.85	13.83	17.85
138	20.29	31.24*	10.49	19.02	11.73	18.26	16.43	2.38*	6.81*	4.95*	17.42	4.86*	22.69*	8.36*	30.89*	20.28	12.19	12.36	25.24*	33.8*	9.85	21.67	8.76	14.28	16.7	9.92	27.72*	25.34*	5.53	6.66	47.41*	16.63	16.35	11.68	6.88	70.77*	34.13*	14.82	32.68*	6.25	18.61	11	1.86*	19.12	7.34	18.97	22.19	13.16	18.11
140						19.36																					29.07*
142						18.33
	Rows highlighted in green represent the linear part of the reaction, and were used to calculate initial reaction rates.
[truncated: 82 more columns]

## Sheet: Fig1C-linear_regression
	100 nM VPS34-CII WT	100 nM VPS34-CII (VPS34 199-REIE-202 > ERIR)	100 nM VPS34-CII WT + RAB5A	100 nM VPS34-CII (VPS34 199-REIE-202 > ERIR) + RAB5A
Best-fit values
Slope	0.3326	0.254	8.653	3.397
Y-intercept	-21.79	-18.85	-204.7	-122.4
X-intercept	65.49	74.22	23.66	36.05
1/slope	3.006	3.937	0.1156	0.2944
Std. Error
Slope	0.0175	0.01471	0.3622	0.1802
Y-intercept	1.197	1.022	10.15	9.04
95% Confidence Intervals
Slope	0.2982 to 0.3671	0.2251 to 0.2829	7.933 to 9.373	3.042 to 3.752
Y-intercept	-24.14 to -19.43	-20.86 to -16.84	-224.9 to -184.6	-140.3 to -104.6
X-intercept	64.65 to 66.28	73.19 to 75.39	23.25 to 24.02	34.36 to 37.43
Goodness of Fit
R squared	0.5769	0.4017	0.8717	0.623
Sy.x	2.126	2.498	5.469	10.62
Is slope significantly non-zero?
F	361.3	298.1	570.7	355.2
DFn, DFd	1, 265	1, 444	1, 84	1, 215
P value	<0.0001	<0.0001	<0.0001	<0.0001
Deviation from zero?	Significant	Significant	Significant	Significant
Equation	Y = 0.3326*X - 21.79	Y = 0.2540*X - 18.85	Y = 8.653*X - 204.7	Y = 3.397*X - 122.4
Data
Number of X values	10496	10752	4096	7424
Maximum number of Y replicates	27	38	29	32
Total number of values	267	446	86	217
Number of missing values	10229	10306	4010	7207

## Sheet: Fig1C-one-wayANOVA
One-way ANOVA
Column D = 100 nM VPS34-CII (VPS34 199-REIE-202 > ERIR) + RAB5A
Number of families	1
Number of comparisons per family	6
Alpha	0.05
Tukey's multiple comparisons test	Mean Diff.	95.00% CI of diff.	Below threshold?	Summary	Adjusted P Value
100nM Complex II WT vs. 100nM Complex II + Rab5	-8.32	-8.483 to -8.158	Yes	****	<0.0001	A-B
100nM Complex II WT vs. 100nM Complex II REIE-->ERIR	0.0786	-0.08069 to 0.2379	No	ns	0.5718	A-C
100nM Complex II WT vs. Column D	-3.064	-3.231 to -2.898	Yes	****	<0.0001	A-D
100nM Complex II + Rab5 vs. 100nM Complex II REIE-->ERIR	8.399	8.256 to 8.542	Yes	****	<0.0001	B-C
100nM Complex II + Rab5 vs. Column D	5.256	5.106 to 5.406	Yes	****	<0.0001	B-D
100nM Complex II REIE-->ERIR vs. Column D	-3.143	-3.290 to -2.996	Yes	****	<0.0001	C-D
Test details	Mean 1	Mean 2	Mean Diff.	SE of diff.	n1	n2	q	DF
100nM Complex II WT vs. 100nM Complex II + Rab5	0.3326	8.653	-8.32	0.06219	19	28	189.2	99
100nM Complex II WT vs. 100nM Complex II REIE-->ERIR	0.3326	0.254	0.0786	0.06096	19	31	1.824	99
100nM Complex II WT vs. Column D	0.3326	3.397	-3.064	0.06368	19	25	68.06	99
100nM Complex II + Rab5 vs. 100nM Complex II REIE-->ERIR	8.653	0.254	8.399	0.05455	28	31	217.8	99
100nM Complex II + Rab5 vs. Column D	8.653	3.397	5.256	0.05757	28	25	129.1	99
100nM Complex II REIE-->ERIR vs. Column D	0.254	3.397	-3.143	0.05624	31	25	79.03	99
Compact letter display
100nM Complex II + Rab5	A
Column D	B
100nM Complex II WT	C
100nM Complex II REIE-->ERIR	C

## Sheet: Fig1B,D-Raw(CII+RAB5A)
Sample	mCherry channel intensity	AF488 channel intensity	AF488 channel background	averaged AF488 channel background	corrected AF488 channel intensity	AF488 channel intensity normalised by mCherry channel intensity
CII WT	23.335	0	0.002	0.0002	-0.0002	-8.57082e-06
0 µM RAB5A	15.297	0	0		-0.0002	-1.30745e-05
	22.202	0	0		-0.0002	-9.0082e-06
	56.78	0	0		-0.0002	-3.52237e-06
	18.232	0	0		-0.0002	-1.09697e-05
	34.553	0	0		-0.0002	-5.78821e-06
	77.576	0	0		-0.0002	-2.57812e-06
	41.919	0	0		-0.0002	-4.77111e-06
	8.043	0	0		-0.0002	-2.48663e-05
	9.761	0.004	0		0.0038	0.000389304
	4.829	0			-0.0002	-4.14164e-05
	10.235	0			-0.0002	-1.95408e-05
	18.726	0			-0.0002	-1.06803e-05
	16.041	0			-0.0002	-1.24681e-05
CII WT	102.767	18.991	3.52	3.69818	15.2928	0.148811
1 µM RAB5A	67.71	15.06	3.76		11.3618	0.167801
	96.861	19.19	3.81		15.4918	0.159939
	87.755	16.725	3.817		13.0268	0.148445
	33.645	9.997	3.828		6.29882	0.187214
			3.704
			3.633
			3.706
			3.597
			3.599
			3.706
CII WT	109.393	45.638	10.027	9.881	35.611	0.325533
4 µM RAB5A	107.643	44.11	9.789		34.083	0.31663
	93.821	43.565	9.696		33.538	0.357468
	178.77	68.716	10.044		58.689	0.328293
	76.859	33.887	10.05		23.86	0.310439
	68.807	30.644	9.951		20.617	0.299635
			9.727
			9.606
			9.807
			10.113
CII WT	75.869	65.062	22.535	21.9535	43.1085	0.568196
8 µM RAB5A	84.079	64.931	21.584		42.9775	0.511156
	28.559	38.319	21.666		16.3655	0.573042
	45.637	45.19	22.266		23.2365	0.509159
	15.925	30.149	22.424		8.1955	0.514631
			22.459
			21.951
			21.837
			21.53
			21.283
CII WT	122.811	113.72	38.737	38.1114	75.6086	0.61565
14 µM RAB5A	33.748	58.545	38.249		20.4336	0.605476
	41.053	59.331	37.802		21.2196	0.516883
	183.377	138.225	37.361		100.114	0.545944
	67.76	80.835	37.024		42.7236	0.630514
	38.7	62.669	37.417		24.5576	0.634563
	27.026	54.706	38.183		16.5946	0.614024
	12.916	44.517	38.728		6.4056	0.495943
	18.014	46.22	38.536		8.1086	0.450128
			39.077
CII WT	85.919	123.226	61.465	62.6338	60.5922	0.705225
20 µM RAB5A	144.904	135.71	61.417		73.0762	0.504308
	69.974	108.415	62.354		45.7812	0.65426
	75.781	115.223	62.093		52.5892	0.693963
	49.823	98.773	63.42		36.1392	0.725352
	59.845	103.513	64.186		40.8792	0.683085
	51.495	102.606	62.615		39.9722	0.776235
	65.397	105.411	63.66		42.7772	0.654116
	42.674	91.192	62.724		28.5582	0.669218
			62.404
CII WT	132.698	188.819	87.164	85.5871	103.232	0.777946
30 µM RAB5A	132.949	184.248	87.79		98.6609	0.742096
	91.444	151.009	85.843		65.4219	0.715431
	40.788	115.882	85.17		30.2949	0.742741
	38.935	116.184	85.157		30.5969	0.785846
	68.28	127.963	82.198		42.3759	0.62062
			83.762
			83.269
			84.133
			83.793
			85.023
			85.234
			86.081
			86.137
			86.873
			87.35
			88.102
			86.084
			86.84
			85.739

## Sheet: Fig1B,D-Analysis(CII+RAB5A)
	Raw data for non-linear fit (one site-specific binding)
	µM RAB5A-AF488
	0	0	0	0	0	0	0	0	0	0	0	0	0	0
	1	0.148811	0.167801	0.159939	0.148445	0.187214
	4	0.325533	0.31663	0.357468	0.328293	0.310439	0.299635
	8	0.568196	0.511156	0.573042	0.509159	0.514631
	14	0.61565	0.605476	0.516883	0.545944	0.630514	0.634563	0.614024	0.495943	0.45012768*
	20	0.705225	0.50430768*	0.65426	0.693963	0.725352	0.683085	0.77623459*	0.654116	0.669218
	30	0.777946	0.742096	0.715431	0.742741	0.785846	0.62061951*
	One site -- Specific binding
	Best-fit values
	Bmax	0.8896	Normalize in Prism with these settings:			Subcolumns: Average the subcolumns, and normalize the means
	Kd	6.267				How is 0% defined?: Smallest mean in each data set
	95% CI (profile likelihood)					How is 100% defined? : Y = 0.8896 becomes 100% for all data sets
	Bmax	0.8338 to 0.9543				Present results as: percentages
	Kd	5.066 to 7.749
	Goodness of Fit
	Degrees of Freedom	36
	R squared	0.9667
	Sum of Squares	0.06351
	Sy.x	0.042
	Number of points
	# of X values	350
	# Y values analyzed	38
	Normalized data for non-linear fit (one site-specific binding)
	µM RAB5A-AF488
	0	0	0	0	0	0	0	0	0	0	0	0	0	0
	1	16.7278	18.8625	17.9787	16.6867	21.0447
	4	36.5932	35.5924	40.183	36.9035	34.8964	33.682
	8	63.871	57.4591	64.4157	57.2346	57.8497
	14	69.2053	68.0616	58.1029	61.3696	70.8761	71.3313	69.0224	55.749
	20	79.2744		73.5454	78.0084	81.5368	76.7856		73.5292	75.2268
	30	87.449	83.419	80.4217	83.4915	88.337
	One site -- Specific binding			In nonlinear regression parameters, select Range > Maximum X value > end curve at 50 µM
	Best-fit values
	Bmax	100
	Kd	6.267
	95% CI (profile likelihood)
	Bmax	93.72 to 107.3
	Kd	5.066 to 7.749
	Goodness of Fit
	Degrees of Freedom	36
	R squared	0.9667
	Sum of Squares	802.5
	Sy.x	4.721
	Number of points
	# of X values	350
	# Y values analyzed	38

## Sheet: Fig1B-Raw(CII-AAAA+RAB5A)
Sample	mCherry channel intensity	AF488 channel intensity	AF488 channel background	averaged AF488 channel background	corrected AF488 channel intensity	AF488 channel intensity normalised by mCherry channel intensity
CII REIE>AAAA	119.061	5.353	0.587	0.5889	4.7641	0.0400139
300 nM RAB5A	114.446	5.512	0.681		4.9231	0.0430168
	105.482	4.801	0.665		4.2121	0.0399319
	157.607	7.02	0.54		6.4311	0.0408047
	117	4.942	0.475		4.3531	0.037206
	59.537	3.168	0.631		2.5791	0.0433193
	129.673	5.829	0.596		5.2401	0.0404101
	37.156	2.274	0.627		1.6851	0.045352
	87.525	4.376	0.556		3.7871	0.0432688
	51.02	2.777	0.531		2.1881	0.0428871
	41.027	2.234			1.6451	0.040098
	78.636	3.882			3.2931	0.0418778
	112.681	4.621			4.0321	0.0357833
	109.384	4.503			3.9141	0.0357831
	70.02	3.48			2.8911	0.0412896
	98.555	4.307			3.7181	0.0377261
	161.068	6.521			5.9321	0.0368298
	76.588	3.655			3.0661	0.0400337
	41.678	2.281			1.6921	0.0405994
	36.233	2.007			1.4181	0.0391384
	101.615	4.517			3.9281	0.0386567
CII REIE>AAAA	134.121	19.98	2.269	1.9878	17.9922	0.134149
750 nM RAB5A	122.416	18.101	1.99		16.1132	0.131627
	125.244	18.105	2.188		16.1172	0.128686
	170.384	23.175	1.807		21.1872	0.12435
	144.418	22.67	2.332		20.6822	0.143211
	166.597	26.141	1.977		24.1532	0.14498
	120.755	19.251	1.871		17.2632	0.142961
	74.812	12.893	1.792		10.9052	0.145768
	108.737	18.349	1.799		16.3612	0.150466
	97.013	14.739	1.853		12.7512	0.131438
	48.239	8.521			6.5332	0.135434
	86.116	13.814			11.8262	0.137329
	231.727	43.36			41.3722	0.178539
	163.019	23.278			21.2902	0.1306
	39.898	7.605			5.6172	0.140789
	67.445	10.996			9.0082	0.133564
	71.113	12.122			10.1342	0.142508
	79.243	12.673			10.6852	0.134841
CII REIE>AAAA	180.488	41.296	3.815	3.5189	37.7771	0.209305
1 µM RAB5A	174.638	40.49	3.561		36.9711	0.211701
	100.383	23.525	3.617		20.0061	0.199298
	161.278	36.5	3.695		32.9811	0.204498
	89.478	20.985	3.556		17.4661	0.1952
	171.763	39.008	3.538		35.4891	0.206617
	69.556	18.428	3.503		14.9091	0.214347
	135.452	31.699	3.272		28.1801	0.208045
	115.375	26.776	3.112		23.2571	0.201578
	68.613	18.263	3.52		14.7441	0.214888
	59.958	14.752			11.2331	0.187349
	83.583	22.116			18.5971	0.222499
	28.003	9.461			5.9421	0.212195
	34.958	10.836			7.3171	0.209311
	45.028	12.792			9.2731	0.205941
	118.19	27.714			24.1951	0.204714
	151.917	33.346			29.8271	0.196338
CII REIE>AAAA	153.627	63.519	6.721	6.8151	56.7039	0.369101
2 µM RAB5A	183.063	70.578	6.897		63.7629	0.348311
	93.414	36.909	6.98		30.0939	0.322156
	103.94	38.355	6.996		31.5399	0.303443
	56.505	27.049	6.622		20.2339	0.35809
	58.665	26.626	6.585		19.8109	0.337695
	50.057	24.09	6.736		17.2749	0.345105
	103.63	39.82	6.985		33.0049	0.318488
	58.398	25.968	6.782		19.1529	0.327972
	82.046	32.613	6.847		25.7979	0.314432
	215.666	93.502			86.6869	0.40195
CII REIE>AAAA	169.533	68.245	8.341	8.3806	59.8644	0.353114
3 µM RAB5A	139.852	55.4	8.493		47.0194	0.336208
	98.539	44.803	8.419		36.4224	0.369624
	89.792	41.18	8.6		32.7994	0.365282
	98.886	44.011	8.369		35.6304	0.360318
	81.737	36.936	8.321		28.5554	0.349357
	65.575	31.384	8.21		23.0034	0.350795
	116.241	46.238	8.285		37.8574	0.32568
	75.208	33.263	8.505		24.8824	0.330848
	51.078	24.814	8.263		16.4334	0.321731
	86.462	39.062			30.6814	0.354854
	76.252	36.857			28.4764	0.373451
CII REIE>AAAA	217.692	118.958	19.031	18.5675	99.927	0.459029
5 µM RAB5A	163.24	99.539	18.649		80.508	0.493188
	129.745	81.889	18.448		62.858	0.484473
	86.333	61.195	18.415		42.164	0.488388
	140.33	93.438	18.312		74.407	0.530229
	73.177	56.587	18.505		37.556	0.513221
	26.109	32.569	18.088		13.538	0.518519
	30.485	34.82	18.433		15.789	0.517927
	27.189	34.108	19.034		15.077	0.554526
	43.709	38.118	18.76		19.087	0.436684
	37.909	35.97			16.939	0.446833
	31.654	33.654			14.623	0.461964
	101.962	63.44			44.409	0.435545
	28.898	31.843			12.812	0.443352
	26.3	32.023			12.992	0.493992
CII REIE>AAAA	238.324	219.179	30.975	30.6919	188.487	0.790886
8 µM RAB5A	190.577	152.778	31.188		122.086	0.640613
	131.428	114.964	31.367		84.2721	0.641204
	131.678	115.355	30.762		84.6631	0.642956
	137.103	112.344	30.591		81.6521	0.595553
	98.595	87.095	30.412		56.4031	0.572069
	175.368	156.182	29.928		125.49	0.715582
	96.343	92.531	30.649		61.8391	0.641864
	142.835	117.792	30.591		87.1001	0.609795
	79.954	81.408	30.456		50.7161	0.634316
	105.183	93.125			62.4331	0.593566
	68.028	71.223			40.5311	0.5958
	85.826	77.894			47.2021	0.549974
	120.409	99.144			68.4521	0.568497
	91.34	80.992			50.3001	0.550691
	138.137	109.634			78.9421	0.571477
	69.971	74.434			43.7421	0.625146
	124.039	110.213			79.5211	0.641098
	86.936	81.671			50.9791	0.586398
CII REIE>AAAA	116.043	111.902	42.374	41.6484	70.2536	0.60541
15 µM RAB5A	143.76	138.593	41.868		96.9446	0.67435
	187.475	164.964	42.332		123.316	0.657771
	75.042	89.488	41.617		47.8396	0.637504
	44.108	70.383	40.968		28.7346	0.65146
	121.657	123.841	40.506		82.1926	0.675609
	34.136	62.382	40.817		20.7336	0.607382
	65.868	89.154	41.502		47.5056	0.721224
	69.118	90.758	42.643		49.1096	0.710518
	61.315	80.14	41.857		38.4916	0.627768

## Sheet: Fig1B-Analysis(CII-AAAA+RAB5A)
	Raw data for non-linear fit (one site-specific binding)
	µM RAB5A-AF488
	0.3	0.0400139	0.0430168	0.0399319	0.0408047	0.037206	0.0433193	0.0404101	0.045352	0.0432688	0.0428871	0.040098	0.0418778	0.0357833	0.0357831	0.0412896	0.0377261	0.0368298	0.0400337	0.0405994	0.0391384	0.0386567
	0.75	0.134149	0.131627	0.128686	0.12435	0.143211	0.14498	0.142961	0.145768	0.150466	0.131438	0.135434	0.137329	0.178539	0.1306	0.140789	0.133564	0.142508	0.134841
	1	0.209305	0.211701	0.199298	0.204498	0.1952	0.206617	0.214347	0.208045	0.201578	0.214888	0.187349	0.222499	0.212195	0.209311	0.205941	0.204714	0.196338
	2	0.369101	0.348311	0.322156	0.303443	0.35809	0.337695	0.345105	0.318488	0.327972	0.314432	0.40195
	3*	0.35311355*	0.33620828*	0.36962421*	0.36528199*	0.36031794*	0.34935708*	0.35079527*	0.32568027*	0.33084778*	0.32173147*	0.35485416*	0.37345119*
	5	0.459029	0.493188	0.484473	0.488388	0.530229	0.513221	0.518519	0.517927	0.554526	0.436684	0.446833	0.461964	0.435545	0.443352	0.493992
	8	0.79088594*	0.640613	0.641204	0.642956	0.595553	0.572069	0.71558152*	0.641864	0.609795	0.634316	0.593566	0.5958	0.549974	0.568497	0.550691	0.571477	0.625146	0.641098	0.586398
	15	0.60541	0.67435	0.657771	0.637504	0.65146	0.675609	0.607382	0.721224	0.710518	0.627768
	One site -- Specific binding
	Best-fit values
	Bmax	0.8196
	Kd	3.212	Normalize in Prism with these settings:			Subcolumns: Average the subcolumns, and normalize the means
	95% CI (profile likelihood)					How is 0% defined?: Smallest mean in each data set
	Bmax	0.7928 to 0.8483				How is 100% defined? : Y = 0.8196 becomes 100% for all data sets
	Kd	2.941 to 3.512				Present results as: percentages
	Goodness of Fit
	Degrees of Freedom	107
	R squared	0.9801
	Sum of Squares	0.1081
	Sy.x	0.03178
	Number of points
	# of X values	550
	# Y values analyzed	109
	Normalized data for non-linear fit (one site-specific binding)
	µM RAB5A-AF488
	0.3	-0.0228115	0.362462	-0.0333336	0.0786398	-0.38308	0.401272	0.0280181	0.662079	0.394792	0.345822	-0.012029	0.216322	-0.56561	-0.565637	0.140863	-0.316342	-0.431346	-0.0202775	0.0522993	-0.135152	-0.19695
	0.75	12.0549	11.7313	11.3541	10.7977	13.2176	13.4446	13.1855	13.5457	14.1484	11.7071	12.2198	12.4629	17.7502	11.5995	12.9069	11.9798	13.1275	12.1437
	1	21.6977	22.0051	20.4137	21.081	19.8879	21.3527	22.3445	21.536	20.7063	22.4139	18.8807	23.3904	22.0685	21.6984	21.266	21.1086	20.034
	2	42.1999	39.5325	36.1767	33.7758	40.7872	38.1705	39.1211	35.7061	36.9229	35.1857	46.4144
	5	53.7379	58.1205	57.0024	57.5047	62.873	60.6909	61.3705	61.2946	65.9903	50.8709	52.1731	54.1144	50.7247	51.7265	58.2237
	8		77.0355	77.1113	77.3361	71.2542	68.2411		77.196	73.0815	76.2276	70.9993	71.2859	65.4064	67.7828	65.4983	68.1652	75.0511	77.0977	70.0796
	15	72.5189	81.3641	79.2369	76.6367	78.4272	81.5256	72.7719	87.3782	86.0045	75.3875
	One site -- Specific binding			In nonlinear regression parameters, select Range > Maximum X value > end curve at 50 µM
	Best-fit values
	Bmax	106.3
	Kd	4.243
	95% CI (profile likelihood)
	Bmax	101.1 to 112.0
	Kd	3.755 to 4.809
	Goodness of Fit
	Degrees of Freedom	107
	R squared	0.9689
	Sum of Squares	2777
	Sy.x	5.094
	Number of points
	# of X values	550
	# Y values analyzed	109

## Sheet: Fig1D-Raw(CII-ERIR+RAB5A)
Sample	mCherry channel intensity	AF488 channel intensity	AF488 channel background	averaged AF488 channel background	corrected AF488 channel intensity	AF488 channel intensity normalised by mCherry channel intensity
CII REIE>ERIR	189.983	3.484	1.519	1.4626	2.0214	0.0106399
1 µM RAB5A	194.29	3.286	1.558		1.8234	0.00938494
	197.41	3.184	1.485		1.7214	0.00871992
	186.045	3.018	1.464		1.5554	0.00836034
	144.214	2.694	1.427		1.2314	0.0085387
	125.577	2.616	1.459		1.1534	0.0091848
	139.579	2.564	1.415		1.1014	0.00789087
	183.274	3.088	1.413
	211.668	3.35	1.393
			1.493
CII REIE>ERIR	115.264	4.66	2.59	2.6137	2.0463	0.0177532
2 µM RAB5A	99.494	4.511	2.477		1.8973	0.0190695
	102.166	4.621	2.693		2.0073	0.0196474
	126.257	4.529	2.563		1.9153	0.0151699
	145.216	4.425	2.6		1.8113	0.0124731
	82.509	3.741	2.633		1.1273	0.0136628
	69.75	3.727	2.627		1.1133	0.0159613
			2.587
			2.697
			2.67
CII REIE>ERIR	197.997	10.564	5.778	5.4493	5.1147	0.0258322
4 µM RAB5A	147.397	9.491	5.428		4.0417	0.0274205
	135.095	8.31	5.502		2.8607	0.0211755
	96.28	7.817	5.507		2.3677	0.0245918
	131.185	8.179	5.271		2.7297	0.020808
	127.315	8.92	5.338		3.4707	0.0272607
	122.741	8.327	5.454		2.8777	0.0234453
			5.256
			5.459
			5.5
CII REIE>ERIR	188.856	35.043	15.162	15.8718	19.881	0.105271
8 µM RAB5A	210.956	40.648	15.178		25.486	0.120812
	161.393	32.605	15.754		17.443	0.108078
	137.757	29.987	15.257		14.825	0.107617
	190.801	30.625	15.903		15.463	0.0810426
	150.668	28.454	16.154		13.292	0.0882205
	140.098	29.074	16.257		13.912	0.0993019
	118.29	28.576	16.864		13.414	0.113399
	126.609	28.306	16.723		13.144	0.103816
	139.529	28.834	15.466		13.672	0.0979868
	127.591	27.224			12.062	0.0945364
	125.148	29.656			14.494	0.115815
	99.59	24.811			9.649	0.0968872
CII REIE>ERIR	220.031	85.403	36.892	36.9328	48.4702	0.220288
15 µM RAB5A	188.697	66.229	37.487		29.2962	0.155255
	165.849	61.247	37.033		24.3142	0.146604
	173.502	62.178	37.918		25.2452	0.145504
	228.77	92.38	36.927		55.4472	0.242371
	169.74	59.613	36.232		22.6802	0.133617
	169.879	62.335	37.235		25.4022	0.149531
	181.34	67.96	36.093		31.0272	0.1711
	164.046	57.758	36.228		20.8252	0.126947
	163.705	58.478	37.283		21.5452	0.13161
	166.493	61.373			24.4402	0.146794
	204.085	65.063			28.1302	0.137836
CII REIE>ERIR	154.342	63.805	42.494	42.2935	21.5115	0.139376
20 µM RAB5A	234.592	76.22	42.154		33.9265	0.144619
	233.708	80.495	41.651		38.2015	0.163458
	218.909	77.07	42.003		34.7765	0.158863
	148.273	61.794	42.08		19.5005	0.131518
	161.457	63.682	41.83		21.3885	0.132472
	176.407	63.868	42.554		21.5745	0.1223
	222.353	74.641	42.317		32.3475	0.145478
			43.064
			42.788
CII REIE>ERIR	208.897	137.04	91.607	91.8383	45.2017	0.216383
40 µM RAB5A	213.572	130.219	91.531		38.3807	0.179708
	234.924	167.254	94.05		75.4157	0.321022
	191.647	134.91	93.789		43.0717	0.224745
	167.248	126.165	92.236		34.3267	0.205244
	163.698	122.087	90.28		30.2487	0.184784
	182.85	125.992	89.893		34.1537	0.186785
	203.384	138.915	90.912		47.0767	0.231467
	173.315	127.423	91.145		35.5847	0.205318
			92.94
CII REIE>ERIR	186.538	158.185	115.216	114.41	43.775	0.234671
50 µM RAB5A	185.237	158.192	114.529		43.782	0.236357
	187.065	155.352	113.534		40.942	0.218865
	195.161	157.56	117.01		43.15	0.2211
	149.914	147.417	114.694		33.007	0.220173
	162.452	154.25	115.017		39.84	0.245242
			115.265
			112.563
			112.595
			113.677

## Sheet: Fig1D-Analysis(CII-ERIR+RAB5A)
	Raw data for non-linear fit (one site-specific binding)
	µM RAB5A-AF488
	2	0.0177532	0.0190695	0.0196474	0.0151699	0.0124731	0.0136627	0.0159613
	4	0.0258322	0.0274205	0.0211755	0.0245918	0.020808	0.0272607	0.0234453
	8	0.105271	0.12081192*	0.108078	0.107617	0.08104255*	0.08822046*	0.0993019	0.113399	0.103816	0.0979868	0.0945364	0.115814875*	0.0968872
	15	0.22028805*	0.155255	0.146604	0.145504	0.24237094*	0.133617	0.149531	0.17109959*	0.12694732*	0.131609908*	0.146794	0.137836
	20	0.139376	0.144619	0.16345825*	0.15886282*	0.131518	0.132472	0.12229957*	0.145478
	40	0.216383	0.17970848*	0.32102169*	0.224745	0.205244	0.184784	0.186785	0.23146708*	0.205318
	50	0.234671	0.236357	0.218865	0.2211	0.220173	0.245242
	One site -- Specific binding
	Best-fit values
	Bmax	0.3253
	Kd	22.1	Normalize in Prism with these settings:			Subcolumns: Average the subcolumns, and normalize the means
	95% CI (profile likelihood)					How is 0% defined?: Smallest mean in each data set
	Bmax	0.2946 to 0.3634				How is 100% defined? : Y = 0.3253 becomes 100% for all data sets
	Kd	17.72 to 27.87				Present results as: percentages
	Goodness of Fit
	Degrees of Freedom	48
	R squared	0.956
	Sum of Squares	0.01335
	Sy.x	0.01668
	Number of points
	# of X values	650
	# Y values analyzed	50
	Raw data for non-linear fit (one site-specific binding)
	µM RAB5A-AF488
	2	5.45747	5.86212	6.03979	4.66334	3.83435	4.20005	4.90664
	4	7.94104	8.4293	6.50952	7.55974	6.39656	8.38018	7.20729
	8	32.3611		33.224	33.0824			30.5263	34.8599	31.9138	30.122	29.0613		29.784
	15		47.7268	45.0675	44.7291		41.0751	45.9672				45.1258	42.3719
	20	42.8452	44.4572			40.4296	40.723		44.7212
	40	66.5179			69.0885	63.0939	56.804	57.4194		63.1165
	50	72.1398	72.6581	67.281	67.9679	67.683	75.3894
	One site -- Specific binding			In nonlinear regression parameters, select Range > Maximum X value > end curve at 50 µM
	Best-fit values
	Bmax	100
	Kd	22.1
	95% CI (profile likelihood)
	Bmax	90.55 to 111.7
	Kd	17.72 to 27.87
	Goodness of Fit
	Degrees of Freedom	48
	R squared	0.956
	Sum of Squares	1262
	Sy.x	5.127
	Number of points
	# of X values	650
	# Y values analyzed	50
