# Supplementary material for: A novel RAB5 binding site in human VPS34-CII that is likely the primordial site in eukaryotic evolution
Source: eLife. 2026 May 28;15:RP110040. doi: 10.7554/eLife.110040 (PMC13218723; doi:10.7554/eLife.110040)
Supplement: Figure 2—figure supplement 3—source data 1. [file elife-110040-fig2-figsupp3-data1.xlsx]

## Sheet: 330 nm
	Fluorescence counts at 330 nm
Temperature, °C	mCherry-VPS34-CII WT	mCherry-VPS34-CII (VPS34 199-REIE-202 > AAAA)	mCherry-VPS34-CII (VPS34 199-REIE-202 > ERIR)	mCherry-VPS34-CII (VPS15 579-SHMIT-583 > DDMIE)	mCherry-VPS34-CII (VPS34 199-REIE-202 > ERIR and VPS15 579-SHMIT-583 > DDMIE)
15	5053.94	4416.65	3141.02	3957.36	3580.94
15.0326	5057.51	4388.63	3142.13	3937.72	3573.71
15.0653	5061.56	4386.88	3132.48	3935.77	3565.53
15.0979	5058.73	4375.47	3132.53	3929.33	3563.29
15.1305	5060.4	4371.76	3125.06	3917.39	3562.83
15.1632	5063.26	4366.86	3124.48	3912.48	3559.87
15.1958	5060.83	4355.82	3123.77	3912.49	3563.33
15.2285	5062.42	4344.91	3118.86	3909.86	3555.37
15.2611	5061.68	4346.83	3116.65	3904.6	3554.41
15.2937	5058.3	4342.58	3114.06	3905.61	3551.32
15.3264	5062.79	4343.4	3111.26	3904.01	3544.14
15.359	5056.21	4334.85	3108.21	3894.95	3547.23
15.3916	5055.93	4332.55	3108.68	3895.5	3542.7
15.4243	5058.68	4328.13	3106.3	3888.48	3545.98
15.4569	5057.48	4318.93	3106.81	3886.66	3541.17
15.4896	5054.85	4321.96	3106.79	3880.27	3538.49
15.5222	5043.71	4315.21	3102.21	3882.81	3533.13
15.5548	5047.46	4315.03	3100.79	3881.48	3531.95
15.5875	5046.14	4312.68	3095.04	3870.47	3530.65
15.6201	5044.79	4305.92	3093.32	3875.58	3531.62
15.6527	5036.34	4305	3094.4	3868.66	3531.18
15.6854	5041.21	4297.74	3089.33	3862.33	3526.82
15.718	5038.06	4294.27	3091.5	3859.07	3523.3
15.7507	5038.66	4290.08	3091.19	3861.02	3524.94
15.7833	5032.36	4287.59	3085.15	3852.95	3520.46
15.8159	5029.86	4292.6	3081.14	3850.55	3517.24
15.8486	5037.4	4280.47	3079.42	3845.73	3519.45
15.8812	5032.13	4279.52	3078.19	3849.52	3520.4
15.9138	5024.22	4274.33	3079.22	3845.83	3520.03
15.9465	5023.32	4275.02	3075.54	3839.69	3515.14
15.9791	5019.85	4271.56	3074.47	3840.07	3512.19
16.0117	5019.48	4271.58	3077.39	3835.33	3509.19
16.0444	5018.45	4262.38	3073.85	3830.27	3512.81
16.077	5021.95	4256.88	3071.94	3830.72	3509.62
16.1097	5021	4259.92	3076.23	3827.76	3506.23
16.1423	5019.71	4254.32	3071.76	3825.86	3501.42
16.1749	5007.22	4252.72	3063.08	3819.28	3503.1
16.2076	5001.34	4247.65	3064.52	3820.4	3498.08
16.2402	5009.51	4247.61	3061.91	3817.56	3501.83
16.2728	5005.26	4244.23	3060.13	3812.3	3496
16.3055	5001.32	4244.74	3063.46	3805.82	3494.23
16.3381	5003.76	4240.93	3059.35	3807.92	3498.4
16.3708	4998.06	4235.97	3056.16	3800.62	3494.3
16.4034	5000.14	4232.87	3055.74	3801.37	3492.91
16.436	5003.08	4231.54	3059.91	3799.37	3487.95
16.4687	5000.14	4231.6	3055.35	3798.66	3490.14
16.5013	4986.27	4219.24	3042.86	3792.78	3482.88
16.5339	4992.1	4219.52	3047.84	3788.98	3489.03
16.5666	4988.11	4211.73	3046.65	3793.07	3484.34
16.5992	4987.63	4207.46	3048.45	3787.96	3481.68
16.6319	4988.73	4208.44	3046.31	3792.25	3480.8
16.6645	4988.2	4210.15	3040.03	3786.48	3479.23
16.6971	4988.17	4202.95	3038.98	3782.01	3476.21
16.7298	4980	4204.07	3036.57	3777.71	3476.24
16.7624	4983.44	4197.1	3039.02	3780.35	3472.31
16.795	4979.85	4196.66	3030.24	3773.44	3469.81
16.8277	4981.18	4196.53	3027.93	3770.96	3467.59
16.8603	4980.26	4193.93	3028.16	3767.88	3472.5
16.893	4979	4186.69	3024.4	3762.24	3468.61
16.9256	4978.02	4189.64	3021.1	3762.2	3470.89
16.9582	4970.85	4181.53	3024.96	3763.29	3470.05
16.9909	4970.87	4178.07	3018.67	3759.37	3467.88
17.0235	4971.68	4178.84	3019.32	3749.04	3466.24
17.0561	4969.19	4172.12	3015.43	3749.16	3461.65
17.0888	4962.92	4171.26	3009.13	3739.54	3462.89
17.1214	4960.18	4163.74	3010.24	3742.21	3462.22
17.154	4960.48	4166.66	3009.11	3743.35	3451.11
17.1867	4956.73	4166.9	3009.46	3743.46	3455.27
17.2193	4954.58	4153.93	3005.96	3741.98	3445.61
17.252	4952.1	4146.55	3003.3	3733.04	3448.15
17.2846	4950.79	4152.57	3003.5	3727.26	3453.38
17.3172	4948.94	4143.67	3002.09	3723.48	3449.31
17.3499	4949.81	4140.73	2998.87	3721.25	3445.11
17.3825	4949.66	4141.61	2998.56	3717.46	3448.28
17.4151	4944	4135.1	2995.32	3717.36	3444.06
17.4478	4943.17	4132.89	2998.48	3714.86	3441.74
17.4804	4938.16	4129.95	2992.96	3711.94	3441.58
17.5131	4937.98	4129.62	2992.31	3705.73	3439.65
17.5457	4930.14	4125.64	2988.59	3705.16	3435.78
17.5783	4931.03	4127.26	2987.38	3704.03	3431.1
17.611	4935.07	4114.53	2984.28	3701.7	3432.18
17.6436	4927.46	4119.79	2985.95	3699	3434.67
17.6762	4921.74	4113.11	2986.03	3696.1	3434.29
17.7089	4920.73	4111.6	2981.87	3692.15	3431.52
17.7415	4922.88	4109.45	2981.65	3691.42	3428.73
17.7742	4916.24	4108.02	2979.37	3686.91	3426.76
17.8068	4914.46	4101.55	2977.7	3682.69	3421.24
17.8394	4911.8	4096.85	2976.72	3681.85	3420.84
17.8721	4913.08	4097.2	2974.47	3675.48	3421.68
17.9047	4910.78	4093.88	2976.15	3676.71	3420.92
17.9373	4906.38	4091.4	2976.41	3674.41	3420.87
17.97	4899.25	4088.7	2974.66	3669.06	3416.24
18.0026	4895.25	4082.36	2973.02	3670.41	3412.02
18.0352	4895.77	4080.64	2968.54	3669.35	3416.23
18.0679	4891.92	4079.18	2966.47	3666.72	3412.58
18.1005	4891.38	4076.23	2968.14	3664.18	3408.59
18.1332	4895.63	4076.37	2967.37	3662.79	3411.79
18.1658	4895.21	4077.36	2959.81	3658.1	3408.74
18.1984	4891.6	4072.99	2959.13	3653.6	3405.49
18.2311	4890.59	4068.5	2959.08	3648.16	3404.86
18.2637	4890.6	4071.71	2958.2	3650.05	3404.85
18.2963	4890.16	4069.32	2959.31	3650.11	3404.26
18.329	4897.62	4065.91	2961.94	3646.61	3403.96
18.3616	4883.06	4055.07	2956.54	3645.89	3398.13
18.3943	4878.05	4050.32	2954.3	3641.6	3393.97
18.4269	4877.26	4053.3	2951.91	3640.41	3389.34
18.4595	4877.71	4052.05	2949.79	3639.94	3388.91
18.4922	4877.81	4044.78	2941.82	3632.45	3391.25
18.5248	4870.07	4044.77	2941.57	3633.62	3392.4
18.5574	4873.42	4044.28	2939.62	3630.41	3386.6
18.5901	4875.46	4048.2	2936.14	3630.98	3386.55
18.6227	4867.6	4039.09	2936.89	3628.68	3386.85
18.6554	4870.82	4035.12	2935.39	3626.17	3383.91
18.688	4861.27	4024.43	2935.4	3622.43	3379.29
18.7206	4860.1	4024.88	2930.88	3620.16	3378.58
18.7533	4859.36	4025.59	2930.15	3615.45	3379.58
18.7859	4854.65	4021.42	2928.28	3618.03	3379
18.8185	4847.77	4013.91	2922.14	3610.26	3380.29
18.8512	4841.94	4007.12	2921.79	3605.61	3377.45
18.8838	4837.62	4011.55	2924.22	3607.64	3375.89
18.9164	4835.08	4011.46	2927.13	3601	3376.47
18.9491	4841.99	4007.24	2921.98	3600.4	3375.47
18.9817	4834.75	4003.47	2922.1	3597.76	3372.88
19.0144	4835.13	4000.48	2915.35	3596.86	3374.35
19.047	4833.56	3995.33	2916.75	3591.23	3370.77
19.0796	4833.83	3996.45	2915.81	3587.5	3369.97
19.1123	4826.6	3998.99	2914.66	3578.76	3369.68
19.1449	4829.51	3992.58	2908.22	3585.3	3364
19.1775	4828.29	3994.01	2902.76	3579.17	3364.75
19.2102	4817.42	3990.63	2911.32	3581.55	3364.8
19.2428	4813.67	3989.7	2909.43	3581.44	3364.36
19.2755	4814.36	3992.89	2904.44	3583.25	3358.05
19.3081	4810.62	3989.13	2905.44	3574.54	3358.23
19.3407	4814.53	3982.71	2906.49	3571.99	3357.28
19.3734	4812.07	3978.95	2904.14	3567.89	3350.22
19.406	4804.18	3978.25	2897.49	3567.22	3354.41
19.4386	4804.73	3973.53	2893.44	3567.09	3351.35
19.4713	4795.3	3972.19	2893.56	3563.52	3352.46
19.5039	4797.92	3971.61	2894.62	3560.71	3352.33
19.5366	4797.94	3964.37	2898.11	3555.64	3347.33
19.5692	4799.94	3959.06	2896.78	3557	3340.41
19.6018	4789.87	3959.37	2883.08	3552.55	3346.28
19.6345	4790.07	3960.13	2882.86	3548.65	3344.3
19.6671	4781.05	3955.23	2885.02	3551.97	3346.27
19.6997	4776.42	3952.14	2885.37	3543.6	3343.89
19.7324	4780.38	3950.6	2879.27	3546.18	3338.52
19.765	4781.55	3952.12	2875.46	3544.55	3338.1
19.7977	4779.88	3944.07	2877.61	3539.13	3337.96
19.8303	4775.13	3942.48	2873.46	3534.37	3338.42
19.8629	4777.75	3946.72	2878.27	3537.39	3335.73
19.8956	4774.73	3943.71	2877.47	3536.21	3334.08
19.9282	4767.35	3936.44	2872.44	3525.65	3331.84
19.9608	4765.19	3938.95	2873.98	3532.82	3328.94
19.9935	4767.01	3927.38	2869.03	3528.54	3327.81
20.0261	4761.02	3925.56	2867.45	3526.27	3325.31
20.0587	4756.42	3928.46	2864.21	3517.38	3326.01
20.0914	4758.5	3925.98	2863.37	3517.81	3324.99
20.124	4758.97	3916.44	2862.98	3517.66	3324.47
20.1567	4756.77	3917.84	2862.15	3513.36	3322.49
20.1893	4752.11	3917.48	2858.8	3513.36	3316.91
20.2219	4750.27	3913	2859.76	3509.82	3317.99
20.2546	4754.89	3917.4	2857.1	3507.63	3317.43
20.2872	4750.49	3913.79	2854.42	3501.88	3317.49
20.3198	4746.34	3908.33	2854.44	3502.1	3319.19
20.3525	4753.66	3906.81	2852.69	3495.99	3315.8
20.3851	4750.48	3904.82	2858.15	3495.98	3313.62
20.4178	4744.58	3902.26	2854.04	3495.26	3314.37
20.4504	4739.86	3901.66	2851.06	3489.83	3308.85
20.483	4735.85	3896.8	2854.1	3488.13	3307.75
20.5157	4739.69	3893.98	2840.57	3486.17	3303.7
20.5483	4738.17	3890.94	2843.55	3486.68	3306.33
20.5809	4731.87	3889.93	2842.38	3488.78	3300.18
20.6136	4732.04	3889.12	2843.03	3487.85	3303.64
20.6462	4733.07	3879.81	2836.82	3480.81	3301.92
20.6789	4730.09	3878.63	2838.5	3476.7	3300.77
20.7115	4718.13	3876.82	2837.37	3472.77	3298.83
20.7441	4715.24	3879.53	2832.83	3472.44	3297.9
20.7768	4720.43	3870.2	2831.23	3471.22	3292.98
20.8094	4722.09	3868.88	2829.66	3473.89	3293.36
20.842	4716.9	3858.8	2829.83	3469.28	3287.98
20.8747	4711.28	3861.01	2833.74	3462.41	3289.26
20.9073	4712.8	3860.52	2829.76	3463.55	3286.18
20.9399	4705.74	3859.34	2827.96	3461.53	3289.88
20.9726	4711.26	3857.04	2826.77	3452.31	3282.14
21.0052	4703.93	3859.54	2828.02	3454.25	3285.91
21.0379	4700.49	3842.89	2820.64	3454.87	3286.47
21.0705	4697.79	3846.89	2821	3450.85	3280.08
21.1031	4702.64	3851.66	2823.45	3445.71	3283.19
21.1358	4699.59	3848.25	2824.74	3443.98	3281.48
21.1684	4695.81	3842.06	2817.17	3441.04	3277.11
21.201	4697.06	3842.87	2815.45	3438.83	3275.25
21.2337	4691.56	3838.21	2815.95	3435.25	3274.11
21.2663	4687.82	3837.24	2815.02	3430.16	3276.32
21.299	4688	3837	2812.03	3431.18	3273.06
21.3316	4685.82	3836.06	2810.94	3425.36	3269.19
21.3642	4677.97	3834.94	2810.15	3424.43	3266.23
21.3969	4671.74	3825.67	2811.46	3428.93	3264.56
21.4295	4667.28	3820.49	2807.34	3424.4	3265.44
21.4621	4666.13	3823.36	2803.73	3421.55	3266.41
21.4948	4666.92	3823.37	2804.67	3419.31	3267.55
21.5274	4664.68	3819.29	2803.52	3414.38	3267.27
21.5601	4665.59	3815.78	2802.37	3415.89	3266.65
21.5927	4663.96	3813.92	2799.81	3415.37	3265.59
21.6253	4660.42	3807.3	2802.2	3414.27	3260.48
21.658	4656.31	3801.83	2801.48	3407.32	3259.46
21.6906	4653.81	3801.5	2799.43	3407.11	3257.99
21.7232	4648.65	3801.64	2797.36	3411.33	3259.84
21.7559	4652.28	3794.43	2791.93	3408.26	3259.08
21.7885	4642.38	3796.06	2788.87	3401.29	3260.36
21.8211	4641.78	3795.32	2784.49	3400.5	3255.82
21.8538	4644.43	3792.95	2786.75	3395.38	3252.58
21.8864	4637.79	3787.31	2784.42	3393.47	3250.12
21.9191	4639.48	3785.4	2783.82	3397.16	3249.72
21.9517	4638.56	3780.16	2783.3	3398	3245.5
21.9843	4636.13	3784.46	2783.99	3392.4	3245.9
22.017	4636.12	3781.49	2781.85	3390.93	3240.55
22.0496	4636.64	3779.72	2780.26	3391.31	3239.11
22.0822	4630.63	3777.76	2778.45	3388.01	3237.94
22.1149	4630.53	3767.65	2773.45	3386.27	3242.33
22.1475	4630.72	3774.06	2773.89	3385.79	3240.95
22.1802	4624.65	3770.38	2771.54	3379.19	3238.14
22.2128	4619.2	3770.24	2770.43	3378.86	3239.31
22.2454	4616.44	3763.45	2769.88	3378.19	3236.11
22.2781	4619.83	3763.05	2768.14	3374.64	3236.59
22.3107	4611.58	3764.66	2769.18	3370.8	3231.36
22.3433	4608.05	3761.34	2768.28	3367.04	3233.33
22.376	4609.07	3760.12	2766.2	3364.04	3228.3
22.4086	4607.51	3759.62	2760.84	3363.76	3226.42
22.4413	4605.52	3754.42	2762.75	3358.96	3225.42
22.4739	4604.07	3755.79	2762.95	3360.41	3223.9
22.5065	4611.07	3750.04	2759.14	3358.19	3229.3
22.5392	4603.21	3748.44	2756.33	3354.13	3223.08
22.5718	4596.98	3747.32	2761.69	3355.68	3227.56
22.6044	4596.95	3739.04	2760.1	3353.8	3227.54
22.6371	4597.72	3742.74	2756.98	3348.5	3221.32
22.6697	4598.58	3739.17	2754.45	3351.18	3226.77
22.7023	4593.19	3740.78	2756.26	3344.66	3221.45
22.735	4593.46	3736.29	2757.11	3341.11	3218.54
22.7676	4594.09	3732.61	2750.62	3338.36	3217.87
22.8003	4590.29	3730.66	2745.67	3334.78	3220.1
22.8329	4584.45	3733.23	2743.97	3331.51	3214.96
22.8655	4580.76	3727.84	2742.62	3331.51	3214.58
22.8982	4574.11	3728.86	2743.27	3333.13	3207.4
22.9308	4574.07	3725.89	2743.25	3335.24	3213.59
22.9634	4577.5	3725.11	2740.05	3325.79	3208.93
22.9961	4579.76	3720.65	2742.36	3326.34	3209.29
23.0287	4577.28	3712.93	2738.37	3329.34	3207
23.0614	4570.85	3707.04	2733.49	3319.89	3212.54
23.094	4567.53	3711.76	2733.8	3325.52	3202.84
23.1266	4568.42	3705.51	2739.56	3321.9	3206.3
23.1593	4573.08	3708.12	2735.98	3324.51	3207.57
23.1919	4571.87	3706.19	2731.42	3317.94	3203.81
23.2245	4556.85	3701.43	2733.18	3312.61	3203.06
23.2572	4552.18	3698.79	2729.18	3315.26	3199.85
23.2898	4551.66	3701.14	2722.74	3315.17	3199.66
23.3225	4550.57	3698.47	2723.25	3311.29	3200.1
23.3551	4543.45	3693.73	2723.78	3311.16	3197.93
23.3877	4544.68	3693.72	2719.22	3309.8	3193.37
23.4204	4542.4	3688.82	2718.64	3308.4	3191.3
23.453	4543.33	3684.16	2718.52	3305.92	3190.46
23.4856	4546.42	3688.47	2711.9	3301.11	3186.47
23.5183	4547.34	3684.28	2710.4	3298.92	3187.28
23.5509	4542.22	3678.95	2711.58	3295.13	3184.34
23.5836	4530.77	3678.55	2711.77	3295.31	3178.11
23.6162	4529.8	3675.06	2708.05	3294.45	3180.58
23.6488	4529.78	3672.11	2706.6	3290.02	3181.9
23.6815	4524.89	3669.68	2706.21	3286.83	3180.97
23.7141	4522.39	3667.03	2704.62	3284.2	3178.03
23.7467	4521.77	3664.99	2702.64	3279.59	3174.28
23.7794	4521.03	3667.19	2699.54	3277.38	3171.88
23.812	4518.98	3667.8	2701.67	3277.93	3172.87
23.8446	4513.95	3661.62	2701.59	3275.82	3173.86
23.8773	4509.2	3658.22	2697.99	3276.62	3170.14
23.9099	4509.25	3656.82	2696.44	3272.56	3170.83
23.9426	4507.29	3654.22	2693.7	3266.44	3173.37
23.9752	4509.12	3655.75	2695.13	3269.11	3170.74
24.0078	4506.89	3654.48	2693.5	3268.64	3167.31
24.0405	4505.52	3649.93	2689.76	3267.74	3165.77
24.0731	4504.19	3650.99	2688.56	3266.79	3164.09
24.1057	4499.24	3647.04	2687.95	3262.76	3163.8
24.1384	4499.31	3646.8	2684.5	3262.49	3160.03
24.171	4491.32	3642.57	2684.03	3256.73	3158.89
24.2037	4493.23	3633.66	2685.39	3258.03	3162.14
24.2363	4488.21	3637.64	2678.44	3260.37	3153.59
24.2689	4485.01	3636.88	2681.34	3255.4	3153.46
24.3016	4483.68	3637.14	2679.19	3251.07	3154.27
24.3342	4485.88	3632.41	2677.61	3247.45	3151.71
24.3668	4486.19	3631.34	2680.22	3243.15	3151.73
24.3995	4481.29	3624.49	2680.17	3242.75	3149.66
24.4321	4476.78	3625.64	2677.31	3245.63	3147.97
24.4648	4479.44	3624.41	2673.34	3245.21	3143.56
24.4974	4472.37	3621.98	2678.13	3242.41	3143.81
24.53	4471.14	3622.38	2679.32	3242.87	3144.22
24.5627	4469.75	3620.76	2674.93	3240.89	3142.95
24.5953	4469.05	3620.16	2677.46	3234.09	3139.45
24.6279	4466.97	3618.64	2670.28	3231.25	3136.8
24.6606	4464.3	3618.45	2670.79	3232.84	3138.14
24.6932	4461.8	3608.7	2673.78	3234	3142.12
24.7258	4462.88	3604.34	2669.24	3233.35	3137.82
24.7585	4453.82	3599.86	2666.18	3227.94	3134.5
24.7911	4452.72	3600.72	2669.67	3225.91	3130.72
24.8238	4454.43	3600	2670.09	3222.42	3136.09
24.8564	4451.05	3597.56	2665.7	3221.62	3129.97
24.889	4451.33	3598.99	2665.36	3216.35	3133.4
24.9217	4449.43	3597.07	2661.57	3215.86	3131.84
24.9543	4447.26	3598.31	2655.68	3210.08	3134.81
24.9869	4443.02	3592.96	2657.29	3208.88	3130.34
25.0196	4447.04	3590.94	2659.94	3209.49	3128.76
25.0522	4443.74	3589.25	2654.95	3204.85	3130.49
25.0849	4433.37	3582.07	2654.68	3196.57	3127.1
25.1175	4433.17	3585.04	2654.26	3200.26	3123.25
25.1501	4431.17	3586.89	2652.08	3196.64	3125.09
25.1828	4426.86	3584.62	2651.81	3197.71	3120.62
25.2154	4424.71	3584.14	2656.79	3193.8	3121.65
25.248	4421.22	3584.05	2651.93	3192.99	3117.99
25.2807	4422.9	3575.13	2648.45	3189.43	3114.47
25.3133	4427.7	3574.66	2643.48	3185.49	3118.95
25.346	4417.37	3576.31	2643.27	3194.06	3115.99
25.3786	4420.88	3573.42	2642.08	3189.62	3113.45
25.4112	4420.68	3573.01	2641.31	3188.9	3118.22
25.4439	4414.97	3571.32	2640.35	3187.06	3114.06
25.4765	4412.62	3558.5	2637.56	3183.73	3114.59
25.5091	4408.5	3555.03	2637.03	3185.76	3109.06
25.5418	4410.11	3562	2635.45	3181.7	3108.63
25.5744	4406.05	3559.89	2636.88	3178.95	3105.83
25.607	4406.38	3560.45	2628.86	3175.11	3109.1
25.6397	4406	3555.61	2630.38	3174.41	3105.81
25.6723	4400.22	3551.41	2634.1	3171.54	3105.83
25.705	4395.94	3549.09	2628.99	3167.86	3103.75
25.7376	4393.5	3544.46	2632.71	3170.84	3099.41
25.7702	4392.38	3544.87	2629.53	3171.8	3097.77
25.8029	4390.49	3542.93	2626.59	3162.29	3101.06
25.8355	4391.5	3533.45	2625.98	3162.95	3097.96
25.8681	4388.32	3540.57	2625.24	3158.36	3092.3
25.9008	4385.77	3535.99	2621.48	3157.86	3093.2
25.9334	4376.03	3525.2	2617.17	3154.37	3096.09
25.9661	4376.23	3530.43	2614.86	3156.37	3090.39
25.9987	4377.93	3530.93	2616.15	3158.22	3088.36
26.0313	4377.6	3527.64	2617.28	3155.16	3087.25
26.064	4376.65	3525.8	2615.05	3148.76	3088.22
26.0966	4374.2	3523.13	2611.85	3148.13	3088.01
26.1292	4371.6	3520.64	2609.82	3146.92	3085.33
26.1619	4372.86	3522.11	2611.4	3142.3	3083.09
26.1945	4372.23	3522.51	2613.56	3140.61	3081.59
26.2272	4367.43	3517.05	2612.01	3140.9	3080.27
26.2598	4367.36	3516.41	2608.5	3140.85	3080.4
26.2924	4363.92	3513.6	2608.58	3138.5	3082.25
26.3251	4362.47	3509.6	2608.84	3138.65	3078.57
26.3577	4359.37	3507.65	2608.12	3128.75	3079.28
26.3903	4353.18	3508.62	2605.38	3127.72	3075.33
26.423	4355.03	3503.13	2604.83	3127.3	3072.97
26.4556	4351.09	3501.35	2602.78	3126.72	3071.43
26.4883	4352.81	3501.53	2601.28	3125.51	3065.77
26.5209	4352.36	3501.97	2602.27	3118.54	3062.9
26.5535	4347.92	3498.6	2596.78	3119.16	3068.67
26.5862	4343.64	3498.14	2595.2	3116.5	3063.72
26.6188	4340.75	3495.28	2595.05	3113.88	3064.96
26.6514	4338.72	3492.18	2594.17	3113.73	3062.65
26.6841	4330.01	3487.96	2592.85	3111.86	3065.73
26.7167	4327.1	3488.37	2591.39	3107.75	3065.19
26.7493	4333.03	3480.65	2589.72	3107.67	3064.42
26.782	4327.4	3474.09	2589.55	3113.17	3063.37
26.8146	4326.04	3481.26	2582.73	3107.82	3064.41
26.8473	4318.13	3479.16	2583.57	3109.69	3058.14
26.8799	4322.08	3473.64	2585.67	3106.63	3056.24
26.9125	4320.08	3473.69	2583.26	3107	3058.5
26.9452	4316.02	3468.41	2583.48	3098.7	3057.81
26.9778	4314.91	3465.77	2583.01	3099.99	3060.27
27.0104	4311.66	3467.52	2580.32	3099.67	3060.93
27.0431	4312.38	3468.82	2577.36	3099.1	3056.57
27.0757	4322.08	3468.68	2577.95	3095.19	3063.37
27.1084	4314.18	3463.42	2575.89	3094.19	3059.91
27.141	4311.02	3462.45	2573.04	3090.71	3057.16
27.1736	4310.61	3458.19	2573.47	3092.73	3055.67
27.2063	4311.01	3461.99	2569.72	3087.08	3057.61
27.2389	4303.83	3459.87	2565.51	3086.76	3053.77
27.2715	4301.08	3451.6	2572.82	3084.82	3052.21
27.3042	4304.61	3450.02	2568.06	3083.04	3049.51
27.3368	4298.31	3447.21	2570.64	3089.32	3045.28
27.3695	4295.3	3448.04	2568.09	3083.85	3039.72
27.4021	4294.61	3446.6	2566	3076.11	3043.94
27.4347	4291.91	3450.12	2559.88	3078.54	3042.21
27.4674	4289.82	3443.63	2555.42	3077.74	3042.04
27.5	4289.71	3436.43	2554.13	3073.63	3034.54
27.5326	4286.65	3444.85	2559.32	3068.15	3034.79
27.5653	4287.53	3444.73	2560.28	3072.58	3037.37
27.5979	4285.01	3439.27	2552.64	3066.54	3037.82
27.6305	4284.35	3437.73	2552.84	3066.76	3028.86
27.6632	4281.03	3436.35	2550.56	3064.1	3031.81
27.6958	4272.4	3437.54	2550.36	3060.2	3028.13
27.7285	4266.08	3431.6	2551.4	3056.97	3028.41
27.7611	4265.83	3426.58	2545.03	3055.27	3027.45
27.7937	4264.28	3425.17	2555.48	3061.18	3024.3
27.8264	4264.51	3425.41	2545.18	3057.75	3025.05
27.859	4258.28	3419.95	2547.59	3055.22	3024.22
27.8916	4263.46	3422.51	2545.25	3052.12	3026.84
27.9243	4264.03	3418.68	2539.03	3053.59	3022.44
27.9569	4263.99	3415.28	2535.6	3047.68	3019.22
27.9896	4262.56	3417.79	2543.01	3045.06	3018.05
28.0222	4264.06	3410.95	2538.57	3046.37	3013.71
28.0548	4263.87	3413.03	2537.09	3043.88	3014.54
28.0875	4257.51	3407.14	2536.51	3040.34	3013.48
28.1201	4258.18	3408.08	2534.91	3042.28	3012.34
28.1527	4250.67	3404.63	2535.89	3042.86	3010.36
28.1854	4253.97	3409.63	2530.07	3035.9	3009.23
28.218	4251.16	3407.97	2529.52	3030.68	3010.13
28.2507	4245.77	3397.81	2525.55	3026.52	3009.2
28.2833	4244.53	3400.3	2528.51	3030.47	3004.33
28.3159	4241.57	3395.53	2524.89	3031.62	3002.67
28.3486	4243.25	3392.84	2528.82	3025.94	3001.6
28.3812	4234.73	3398.26	2526.55	3020.86	3003.88
28.4138	4237.64	3393.35	2525.27	3023.55	3002.58
28.4465	4239.54	3386.81	2522.9	3019.82	3001.17
28.4791	4233.61	3386.66	2522.84	3022.06	3001.56
28.5117	4229.33	3387.8	2522.85	3022.37	2995.39
28.5444	4225.64	3383.34	2517.88	3020.47	2999.5
28.577	4221.11	3371.21	2517.03	3017.9	2997.31
28.6097	4223.31	3376.23	2518.3	3015.13	2995.94
28.6423	4222.39	3373.76	2517.25	3012.3	2990.82
28.6749	4219.64	3375.7	2513.54	3007.89	2986.06
28.7076	4214.31	3378.76	2513.57	3004.78	2984.97
28.7402	4211.94	3375.25	2513.08	3007.6	2986.73
28.7728	4212.98	3369.96	2509.01	3010.04	2986.88
28.8055	4211.92	3365.83	2509.78	3008.14	2985.77
28.8381	4204.4	3364.13	2508.4	3010.73	2988.44
28.8708	4211.14	3369.9	2510.8	3005.39	2981.04
28.9034	4211.82	3368.25	2505.18	3001.71	2983.47
28.936	4208.34	3357.08	2505.92	3003.83	2984.4
28.9687	4206.07	3357.48	2502.44	3002.4	2981.26
29.0013	4203.67	3355.58	2507.66	2997.01	2979.43
29.0339	4202.17	3352.71	2504.23	2996.44	2977.64
29.0666	4200.82	3351.31	2503.25	2997.37	2979.06
29.0992	4198.61	3347.2	2501.24	2996.16	2977.81
29.1319	4196.31	3349.21	2502.17	2985.85	2974.19
29.1645	4194.54	3348.13	2500.08	2986.55	2972.55
29.1971	4189.22	3348.73	2499.65	2982.17	2977.05
29.2298	4181.19	3344.97	2496.87	2983.33	2968.16
29.2624	4178.39	3343.31	2498.01	2981.57	2975.75
29.295	4178.48	3345.43	2494.73	2982.19	2972.73
29.3277	4179.2	3340.57	2489.63	2973.47	2971.71
29.3603	4180.16	3337.73	2486.21	2978.56	2974.55
29.393	4171.72	3335.74	2489.99	2973	2967.43
29.4256	4169.31	3335.12	2482.07	2965.95	2968.8
29.4582	4168.98	3333.07	2486.67	2973.15	2967.29
29.4909	4167.96	3334.37	2485.53	2973.04	2966.01
29.5235	4163.2	3327.61	2491.54	2970.29	2965.62
29.5561	4161.67	3325.75	2485.47	2968.62	2961.73
29.5888	4161.25	3323.67	2481.33	2970.05	2962.67
29.6214	4155.71	3322.5	2480.07	2966.34	2960.23
29.654	4153.62	3328.35	2484.15	2962.69	2958.96
29.6867	4155.66	3322.29	2481.4	2961.51	2953.53
29.7193	4150.92	3321.63	2481.17	2960.63	2956.97
29.752	4150.5	3316.91	2476.83	2955.17	2952.73
29.7846	4148.4	3310.63	2478.61	2960.74	2950.5
29.8172	4148.46	3311.73	2476.59	2960.63	2949.47
29.8499	4147.41	3315.02	2475.06	2958.37	2950.33
29.8825	4144.16	3308.44	2473.32	2955.55	2948.15
29.9151	4143.7	3301.56	2473.81	2951.49	2945.96
29.9478	4142.28	3302.78	2472.49	2947.27	2944.07
29.9804	4138.08	3302.29	2469.74	2945.68	2943.5
30.0131	4138.06	3297.72	2471.53	2942.63	2939.19
30.0457	4135.37	3295.98	2471.81	2940.17	2936.53
30.0783	4134.22	3297.61	2467.97	2938.32	2939.71
30.111	4134.23	3298.72	2467.01	2936.14	2939.53
30.1436	4133.57	3298.4	2468.58	2936.76	2939.05
30.1762	4131.91	3295.82	2464.46	2936.31	2937.7
30.2089	4135.84	3290.57	2464.77	2932.11	2936.97
30.2415	4139.55	3287.72	2464.37	2926.34	2934.99
30.2742	4132.87	3288.62	2462.24	2923.86	2930.95
30.3068	4131.75	3286.95	2458.13	2924.27	2933.05
30.3394	4130.69	3283.19	2459.38	2929.73	2930.44
30.3721	4129.21	3277.37	2462.15	2923.23	2924.75
30.4047	4123.76	3278.92	2463.81	2919.31	2926.02
30.4373	4120.69	3282.24	2459.64	2916.26	2927.05
30.47	4118.61	3279.03	2458.85	2920.4	2926.53
30.5026	4114.83	3277.97	2457.71	2921.73	2922.91
30.5352	4113.61	3278.53	2453.75	2918.69	2923.42
30.5679	4116.61	3274.45	2452.77	2914.32	2924.34
30.6005	4112.52	3271.8	2449.49	2913.44	2922.92
30.6332	4114.12	3272.95	2448.31	2913.17	2921.87
30.6658	4105.56	3269.47	2446.67	2912.11	2913.11
30.6984	4105.91	3264.63	2447.47	2908.85	2918.63
30.7311	4110.22	3268.33	2438.64	2910.23	2917.67
30.7637	4108.22	3264.66	2446.76	2909.16	2915.11
30.7963	4104.61	3264.84	2443.05	2910.7	2914.67
30.829	4097.25	3265.34	2442.16	2905.39	2909.49
30.8616	4097.8	3258.7	2439.59	2901.47	2910.59
30.8943	4092.08	3253.61	2439.53	2897.64	2913.61
30.9269	4099.25	3255.95	2437.52	2899.54	2910.11
30.9595	4096.41	3254.89	2435.93	2893.79	2907.88
30.9922	4091.63	3250.43	2437.23	2896.66	2907.43
31.0248	4092.33	3245.58	2434.06	2890.86	2910.97
31.0574	4095.03	3244.86	2433.7	2891.93	2900.69
31.0901	4088.48	3243.6	2435.16	2889.54	2902.11
31.1227	4091.03	3249.31	2435.54	2888.25	2902.56
31.1554	4089.44	3243.18	2433.33	2888.24	2902.32
31.188	4087.94	3239.83	2428.68	2886.62	2894.73
31.2206	4084.55	3238.5	2427.93	2884.87	2894.71
31.2533	4082.18	3236.25	2433.44	2883.05	2894.05
31.2859	4073.92	3232.59	2429.22	2877.27	2894.98
31.3185	4070.19	3232.89	2429.57	2880.08	2892.14
31.3512	4065.45	3231.53	2425.51	2878.74	2891.3
31.3838	4062.32	3228.02	2423.41	2877.66	2894.9
31.4164	4065.61	3231.15	2424.89	2879.15	2890.22
31.4491	4065.68	3227.32	2420.97	2872.82	2891.46
31.4817	4060.73	3223.71	2421.26	2868.98	2887.08
31.5144	4061.34	3225.11	2417.05	2873.15	2889.38
31.547	4059.26	3224.12	2418.3	2869.58	2884.12
31.5796	4052.39	3218.18	2415.23	2871.11	2883.54
31.6123	4054.79	3216.45	2413.67	2867.06	2882.89
31.6449	4048.24	3218.67	2418.23	2865.76	2884.48
31.6775	4049.03	3214.52	2417.23	2864.33	2878.74
31.7102	4043.34	3215.98	2411.08	2862.88	2880.59
31.7428	4043.46	3217.24	2408.73	2862.04	2877.81
31.7755	4043.73	3208.99	2406.9	2861.26	2879.15
31.8081	4041.69	3204.17	2408.67	2857.78	2880.43
31.8407	4040.91	3208.07	2410.13	2860.8	2886
31.8734	4036.15	3204.69	2407.91	2858.23	2874.44
31.906	4039.48	3203.38	2401.13	2857.34	2878.05
31.9386	4040.16	3203.12	2400.91	2853.88	2874.95
31.9713	4035	3198.72	2402.64	2852.56	2869.7
32.0039	4025.94	3197.05	2402.74	2851.2	2872.7
32.0366	4034.52	3192.01	2400.31	2849.95	2876.41
32.0692	4033.36	3191.6	2399.51	2847.08	2876.38
32.1018	4033.62	3188.99	2397.3	2841.48	2872.66
32.1345	4026.55	3190.01	2396.09	2840.7	2870.8
32.1671	4020.76	3196.22	2398.78	2837.39	2872.13
32.1997	4020.76	3188.31	2396.56	2838.8	2868.28
32.2324	4018.94	3187.6	2391.58	2832.07	2873.98
32.265	4017.59	3184.62	2390.53	2838.33	2868.8
32.2977	4011.49	3185.36	2389.29	2836.21	2862.93
32.3303	4009.9	3179.51	2388.62	2832.39	2860.91
32.3629	4011.29	3179.4	2390.07	2828	2857.13
32.3956	4008.15	3176.8	2388.36	2827.91	2860.02
32.4282	4002.58	3176.2	2380.54	2824.89	2860.07
32.4608	3998.85	3172.74	2379.28	2827.93	2856.48
32.4935	4008.03	3171.86	2382.91	2819.67	2856.63
32.5261	4003.34	3165.83	2381.84	2822.26	2856.07
32.5587	3995.85	3166.62	2376.73	2824.47	2857.97
32.5914	3992.34	3164.78	2374.22	2821.68	2860.34
32.624	3991.52	3165.1	2371.67	2820.27	2857.94
32.6567	3989.53	3162.68	2370.75	2823.28	2858.35
32.6893	3986.18	3164.7	2371.85	2821.37	2852.54
32.7219	3988.05	3161.99	2369.48	2814.72	2848.22
32.7546	3984.32	3160.49	2363.86	2810.47	2846.11
32.7872	3979.64	3159.54	2365.26	2810.18	2846.53
32.8198	3978.58	3155.84	2367.15	2811.38	2845.15
32.8525	3982.71	3154.89	2365.71	2807.73	2841.13
32.8851	3979.48	3154.6	2364.28	2802.37	2845.93
32.9178	3972.62	3152.26	2360.05	2804.56	2847.02
32.9504	3972.04	3152.59	2359.98	2806.02	2842.64
32.983	3967.06	3147.7	2360.02	2801.1	2834.64
33.0157	3966.91	3142.91	2360.69	2797.71	2838.32
33.0483	3969.89	3144.61	2359.13	2802.89	2838.49
33.0809	3963.81	3142.12	2359.2	2801.7	2833.54
33.1136	3966.26	3142.63	2354.45	2800.79	2831.6
33.1462	3960.63	3137.67	2355.75	2795.98	2834.8
33.1789	3963.2	3137.23	2358.26	2797.17	2824.42
33.2115	3957.8	3136.35	2357.45	2794.24	2823.08
33.2441	3949.32	3134.75	2352.95	2793.45	2828.53
33.2768	3945.63	3133.79	2354.85	2792.2	2825.48
33.3094	3945.72	3129.88	2354.92	2796.06	2823.91
33.342	3942.86	3130.25	2355.47	2791.66	2821.68
33.3747	3942.31	3130.46	2356.34	2789.04	2818.37
33.4073	3939.13	3131.86	2351.15	2783.9	2817.95
33.4399	3945.79	3126.79	2354.11	2786.66	2822.04
33.4726	3945.94	3125.04	2353.54	2784.48	2823.01
33.5052	3938.73	3117.74	2349.76	2776.07	2820.9
33.5379	3936.81	3113.47	2344.88	2775.4	2818.79
33.5705	3940.67	3116.94	2347.17	2774.03	2812.8
33.6031	3936.18	3116.71	2349.98	2772.05	2816.46
33.6358	3926.77	3112.01	2346.22	2776.01	2816.21
33.6684	3925.99	3110.05	2346.08	2774.81	2814.99
33.701	3928.25	3111.15	2344.84	2766.68	2814.32
33.7337	3932.98	3105.67	2343.81	2771.75	2814.3
33.7663	3924.25	3109.3	2343.28	2764.42	2813.96
33.799	3922.67	3108.08	2342.94	2767.28	2811.6
33.8316	3919.15	3104.99	2338.79	2762.2	2811.88
33.8642	3917.28	3102.93	2340.93	2762.84	2809.11
33.8969	3916.57	3104.61	2335.13	2762.35	2809.25
33.9295	3916.02	3106.48	2338.9	2760.7	2804.75
33.9621	3914.01	3101.64	2333.85	2762.23	2803.34
33.9948	3910.13	3097.39	2333.27	2757.17	2800.9
34.0274	3911.77	3095.13	2335.5	2754.71	2801.52
34.0601	3904.81	3093.18	2330.13	2752.28	2798.74
34.0927	3908.86	3093.32	2330.99	2753.61	2795.25
34.1253	3909.38	3091.22	2330.28	2752.47	2798.3
34.158	3902.76	3090.21	2329.22	2754.12	2803.88
34.1906	3903.14	3087.29	2326.94	2753.16	2796.07
34.2232	3896.95	3091.59	2325.83	2741.27	2794.93
34.2559	3887.54	3084.26	2326.71	2743.94	2792.28
34.2885	3886.87	3084.97	2326.25	2749.88	2783.28
34.3211	3886.53	3081.92	2324.69	2744.71	2787.17
34.3538	3883.52	3075.81	2323.93	2738.97	2786.58
34.3864	3885.9	3076.81	2319.78	2738.21	2785.34
34.4191	3876.96	3079.69	2320.52	2736.21	2784.54
34.4517	3880.61	3074.77	2317.94	2739.11	2783.7
34.4843	3875.81	3069.04	2317.05	2732.6	2780.05
34.517	3877.91	3069.01	2313.74	2729.75	2780.66
34.5496	3879.25	3070.83	2310.19	2730.29	2780.55
34.5822	3873.24	3067.43	2313.38	2732.61	2780.01
34.6149	3871.74	3064.69	2311.57	2729.98	2778.49
34.6475	3872.92	3063.47	2313.03	2727.19	2776.53
34.6802	3872.45	3056.7	2313.71	2729.11	2777.14
34.7128	3871.77	3054.57	2309.06	2731.09	2774.3
34.7454	3866.46	3060.55	2313.61	2730.55	2769.92
34.7781	3864.31	3059.72	2311.01	2725.63	2767.47
34.8107	3866.43	3053.93	2311.56	2724.4	2770.6
34.8433	3865.67	3055.34	2308.16	2724.75	2766.01
34.876	3855.35	3055.36	2305.98	2719.32	2765.99
34.9086	3854.3	3053.7	2303.98	2719.99	2770.34
34.9413	3853.76	3054.12	2299.9	2719.42	2766.96
34.9739	3854.16	3050.5	2299.43	2714.16	2765.48
35.0065	3853.01	3048.45	2300.99	2713.97	2767.71
35.0392	3848.43	3047.89	2300.7	2715.05	2764.74
35.0718	3844.76	3045.44	2300.58	2713.56	2760.58
35.1044	3847.76	3041.65	2299.32	2712.68	2759.78
35.1371	3847.07	3038.65	2294.9	2709.8	2759.78
35.1697	3844.79	3038.59	2294.97	2707.47	2758.53
35.2023	3842.92	3036.39	2293.67	2705.33	2758.19
35.235	3841.47	3036.01	2293.45	2704.03	2758.44
35.2676	3838.19	3033.64	2291.55	2703.81	2756.95
35.3003	3839.05	3035.1	2290.16	2699.79	2758.51
35.3329	3835.86	3034.07	2287.63	2699.73	2757.08
35.3655	3832.66	3031.2	2290.82	2698.74	2754.59
35.3982	3830.54	3032.27	2293.4	2691.92	2750.73
35.4308	3829.24	3030.89	2283.73	2696.82	2750.78
35.4634	3827.54	3025.65	2285.05	2692.72	2749.81
35.4961	3825.46	3027.39	2286.15	2694.14	2749.98
35.5287	3821.42	3023.4	2283.5	2690.71	2747.3
35.5614	3823.3	3024.63	2280.76	2689.38	2748.38
35.594	3819.16	3025.29	2282.68	2687.2	2744.32
35.6266	3827.23	3019.51	2276.24	2685.09	2745.51
35.6593	3826.93	3015.15	2271.93	2686.42	2745.58
35.6919	3816.18	3015.69	2276.27	2684.15	2745.66
35.7245	3816.54	3015.63	2274.77	2680.21	2746.1
35.7572	3814.96	3016.88	2272.25	2681.24	2740.24
35.7898	3810.45	3013.95	2273.85	2676.55	2740.2
35.8225	3809.92	3016.15	2272.68	2677.81	2737.1
35.8551	3806.7	3009.54	2273.39	2672.78	2734.34
35.8877	3807.9	3010.3	2272.63	2673.54	2736.62
35.9204	3802.05	3006.6	2268.04	2672.32	2735.14
35.953	3806.28	3006.9	2267.11	2672.44	2732.05
35.9856	3802.54	3001.94	2267.08	2666.78	2733.63
36.0183	3791.91	3002.62	2266.57	2665.89	2727.34
36.0509	3792.24	2998.34	2264.75	2662.83	2722.48
36.0836	3793.11	2997.83	2262.9	2665.6	2723.29
36.1162	3787.13	2996.09	2260.67	2671.2	2725.52
36.1488	3787.63	2997.1	2266.17	2666.24	2725.84
36.1815	3788.04	2997.53	2266.22	2660.59	2721.72
36.2141	3780.51	2987.77	2258.94	2665.43	2727.39
36.2467	3782.74	2984.76	2258.72	2660.91	2720.54
36.2794	3778.15	2985.99	2257.1	2657.42	2718.54
36.312	3778.28	2986.99	2256.16	2658.75	2718.07
36.3446	3782.19	2979.53	2253.01	2654.15	2716.76
36.3773	3779.59	2976.74	2253.93	2651.19	2718.45
36.4099	3778.33	2979.46	2254.65	2651.13	2714.29
36.4426	3772.87	2977.91	2255.45	2648.39	2713.07
36.4752	3773.55	2974.77	2250.64	2647.33	2711.41
36.5078	3770.29	2974.42	2249.58	2646.57	2712.89
36.5405	3768.63	2968.34	2249.08	2651.35	2708.51
36.5731	3769.87	2965.69	2246.17	2647.67	2712.34
36.6057	3764.45	2969.61	2242.55	2645.9	2711.62
36.6384	3765.05	2967.01	2241.34	2639.91	2707.46
36.671	3766.06	2962.74	2244.42	2637.78	2705.54
36.7037	3762.23	2963.92	2241.74	2636.02	2701.96
36.7363	3760.48	2964.55	2239.39	2636.79	2703.97
36.7689	3754.51	2959.96	2240.86	2635.87	2707.61
36.8016	3750.98	2959.4	2242.88	2631.49	2705.43
36.8342	3751.74	2958.4	2239.43	2633.5	2701.34
36.8668	3747.28	2956.73	2238.39	2637.93	2700.08
36.8995	3748.38	2954.39	2240.22	2637.18	2700.4
36.9321	3747.93	2952.37	2237.6	2632.19	2700.98
36.9648	3741.86	2948.22	2234.84	2629.21	2697.39
36.9974	3736.95	2946.25	2238.16	2630.1	2693.69
37.03	3734.84	2947.95	2237.26	2626.18	2692.86
37.0627	3735.03	2948.06	2235.39	2624.66	2691.53
37.0953	3734.4	2942.99	2231.71	2622.65	2690.68
37.1279	3732.42	2939.48	2230.57	2620.82	2691.1
37.1606	3731.3	2935.72	2231.46	2618.05	2692.69
37.1932	3730.28	2933.79	2230.85	2615.02	2689.98
37.2258	3728.91	2934.39	2229.5	2613.86	2687.45
37.2585	3727.58	2931.62	2224.98	2610.82	2686.48
37.2911	3722.43	2936.8	2223.62	2613.5	2685.3
37.3238	3721.31	2936.84	2223.87	2610.17	2686
37.3564	3718.85	2932.74	2221.65	2607.63	2680.94
37.389	3718.24	2928.39	2221.99	2609.74	2676.79
37.4217	3721.46	2923.18	2220.34	2605.07	2676.3
37.4543	3724.99	2924.59	2219.82	2604.61	2679.38
37.4869	3716.88	2923.48	2223.05	2607.71	2679.35
37.5196	3711.93	2919.09	2220.81	2605.95	2674.02
37.5522	3709.85	2919.06	2217.41	2603.78	2670.53
37.5849	3711.01	2917.82	2215.35	2600.61	2673.77
37.6175	3712.25	2915.65	2216.12	2600.2	2674.64
37.6501	3711.31	2910.47	2216.29	2598.33	2670.89
37.6828	3706.11	2914.77	2215.58	2594.62	2670
37.7154	3703.91	2914.21	2215.74	2594.54	2668.18
37.748	3699.32	2909.72	2212.17	2590.45	2665.32
37.7807	3690.18	2907.74	2210.04	2588.29	2664.23
37.8133	3696.34	2908.02	2214.04	2588.8	2667.16
37.846	3693.37	2906.12	2211.91	2586.58	2664.59
37.8786	3693.01	2903.57	2207.74	2581.3	2658.51
37.9112	3692.54	2902.73	2208.48	2580.44	2657.95
37.9439	3688.16	2901.57	2208.65	2582.62	2662.02
37.9765	3683.63	2902.51	2211.66	2579.61	2662.33
38.0091	3688.39	2900.41	2204.99	2582.44	2655.67
38.0418	3685.88	2899.57	2201.35	2584.94	2654.7
38.0744	3681.41	2894.19	2198.23	2583.53	2656.64
38.107	3682.33	2887.92	2200.08	2580.26	2656.28
38.1397	3674.85	2890.43	2194.68	2578.96	2648.8
38.1723	3672.84	2887.29	2194.97	2579.45	2648.47
38.205	3670.63	2885.71	2193.74	2573.23	2647.06
38.2376	3668.45	2886.29	2191.87	2571.22	2650.79
38.2702	3673.56	2888.38	2192.34	2568.86	2652.48
38.3029	3671.91	2890.87	2191.69	2569.27	2645.5
38.3355	3670.77	2881.28	2186.56	2568.12	2645.45
38.3681	3665.04	2876.34	2182.31	2568.1	2640.6
38.4008	3661.08	2880.75	2186.42	2564.8	2641.14
38.4334	3663.07	2875.05	2184.39	2561.69	2639.77
38.4661	3658.94	2871.14	2183.62	2564.73	2641.49
38.4987	3655.14	2862.62	2187.22	2562.15	2637.93
38.5313	3658.71	2873.87	2183.51	2563.37	2635.44
38.564	3658.59	2872.03	2182.43	2558.3	2630.72
38.5966	3652.33	2871.9	2179.4	2559.15	2633.3
38.6292	3656.82	2868.99	2181.8	2557.5	2626.18
38.6619	3647.56	2865.73	2179.79	2556.42	2629.84
38.6945	3644.79	2863.91	2177.37	2552.18	2625.62
38.7272	3641.6	2866.7	2177.48	2553.65	2629.97
38.7598	3643.86	2864.78	2177.17	2551.83	2625.44
38.7924	3638.52	2861.34	2171.93	2548.94	2623.42
38.8251	3636.54	2858.3	2168.34	2544.23	2620.79
38.8577	3639.37	2857.77	2175.47	2546.66	2624.84
38.8903	3635.97	2854.28	2169.87	2543.15	2619.55
38.923	3630.77	2853.8	2171.04	2539.62	2618.57
38.9556	3629.32	2851.51	2170.6	2536.47	2614.25
38.9883	3634.91	2852.09	2167.74	2539.46	2620.24
39.0209	3636.58	2840.62	2167.96	2533.02	2617.86
39.0535	3629.22	2844.52	2165.57	2538.74	2614.88
39.0862	3628.69	2839.7	2164.54	2536.42	2610.94
39.1188	3619.39	2839.9	2166.43	2535.23	2614.05
39.1514	3618.11	2835.63	2167.36	2531.82	2611.07
39.1841	3611.1	2840.93	2165.24	2533.7	2613.58
39.2167	3616.76	2838.16	2160.64	2530.34	2607.5
39.2493	3615.84	2841.18	2163.94	2531.51	2613.18
39.282	3612.16	2838.72	2158.14	2534.26	2607.87
39.3146	3614.46	2831.94	2158.44	2536.28	2608.11
39.3473	3608.87	2834.39	2155.29	2534.92	2610.93
39.3799	3599.14	2833.58	2158.58	2528.92	2602.58
39.4125	3599.67	2833.92	2156.65	2527.17	2607.84
39.4452	3595.8	2827.22	2153.63	2530.14	2601.21
39.4778	3594.06	2823.76	2153.16	2524.76	2597.73
39.5104	3596.75	2828.54	2158.54	2524.46	2597.52
39.5431	3593.62	2822.58	2156.47	2521.97	2597.11
39.5757	3589.07	2823.8	2151.06	2519.47	2599.3
39.6084	3587.67	2825.7	2151.16	2515.78	2597.55
39.641	3590.26	2822.47	2141.86	2515.66	2595.9
39.6736	3586.03	2819.4	2146.25	2512.69	2593.25
39.7063	3580.59	2816.18	2146.54	2513.66	2594.05
39.7389	3579.61	2815.11	2144.89	2509.97	2595.11
39.7715	3577.8	2813.93	2138.64	2510.79	2591.45
39.8042	3576.66	2810.32	2140.07	2508.07	2589.38
39.8368	3575.07	2810.55	2144.78	2503.99	2590.22
39.8695	3570.79	2814.19	2142.75	2504.23	2587.35
39.9021	3566.27	2808.04	2144.28	2503.46	2583.3
39.9347	3569.07	2805.72	2141.21	2498.58	2583.01
39.9674	3569.9	2806.54	2136.51	2496.58	2584.75
40	3561.48	2808.11	2135.41	2496.33	2584.84
40.0326	3564.1	2804.9	2132.6	2495.65	2581.67
40.0653	3557.99	2801.73	2129.69	2497.15	2577.35
40.0979	3558.01	2802.57	2130.44	2490.66	2574.06
40.1305	3556.21	2803.4	2132.12	2488.71	2576.85
40.1632	3551.79	2801.85	2131	2486.61	2575.89
40.1958	3552.85	2798.35	2128.54	2488.56	2576.7
40.2285	3551.74	2793.85	2125.96	2487.88	2573.97
40.2611	3553.45	2794.13	2124.25	2486.19	2573.83
40.2937	3548.8	2792.14	2121.97	2486.09	2569.27
40.3264	3553.24	2788.04	2122.92	2483.45	2569.54
40.359	3549.76	2784.25	2121.85	2480.17	2567.85
40.3916	3545.04	2786.5	2119.93	2481.12	2568.11
40.4243	3540.92	2785.48	2118.05	2478.43	2565.65
40.4569	3541.03	2781.49	2118.66	2476.39	2571.45
40.4896	3540.19	2778.52	2115.68	2475.81	2563.58
40.5222	3537.09	2779.75	2118.72	2477.02	2561.27
40.5548	3537.73	2776.44	2113.63	2473.86	2560.02
40.5875	3530.54	2771.68	2115.76	2476.23	2561.17
40.6201	3534.08	2769.93	2115.07	2471.77	2562.08
40.6527	3532.43	2769.2	2109.17	2469.42	2560.08
40.6854	3529.77	2764.49	2107.57	2468.69	2557.64
40.718	3525.89	2767.56	2106.59	2466.44	2557.48
40.7507	3522.71	2761.5	2108.45	2465.89	2555.84
40.7833	3529.89	2763.65	2108.17	2465.05	2553.4
40.8159	3523.77	2764.35	2108.4	2463.17	2553.53
40.8486	3525.32	2759.89	2109.95	2456.7	2552.25
40.8812	3517.27	2758.64	2107.83	2457.61	2548.53
40.9138	3515.68	2762.38	2107.97	2458.36	2546.25
40.9465	3514.58	2758.28	2102.72	2456.2	2546
40.9791	3509.67	2752.2	2100.12	2454.52	2546.66
41.0117	3507.51	2748	2101.29	2453.7	2542.74
41.0444	3508.01	2751.8	2100.89	2453.52	2539.86
41.077	3505.57	2752.56	2098.35	2453.24	2540.91
41.1097	3502.45	2749.73	2095.88	2450.36	2539.75
41.1423	3502.34	2745.33	2093.29	2444.32	2536.6
41.1749	3500.1	2744.88	2092.53	2444.75	2537.95
41.2076	3502.65	2740.01	2096.44	2443.76	2537.22
41.2402	3498.27	2740.34	2095.28	2443.82	2533.75
41.2728	3490.38	2738.98	2092.08	2443.93	2536.87
41.3055	3491.31	2736.99	2089.05	2442.17	2533.91
41.3381	3486.57	2732.91	2090.25	2441.61	2531.7
41.3708	3483.87	2729.14	2085.76	2436.86	2534.02
41.4034	3483.14	2728.45	2083.78	2435.83	2526.76
41.436	3473.85	2726.2	2082.95	2433.33	2528.63
41.4687	3476.76	2730.54	2085.76	2433.81	2525.56
41.5013	3473.46	2733.15	2083.7	2436.67	2524.37
41.5339	3478.92	2722.4	2081.09	2426.72	2524.38
41.5666	3469.29	2723	2085.57	2426.26	2518.08
41.5992	3467.57	2718.3	2079.65	2428.08	2525.64
41.6319	3465.19	2715.83	2074.11	2423.96	2521.1
41.6645	3462.83	2723.09	2077.67	2427.38	2522.31
41.6971	3461.88	2722	2075.15	2419.94	2515.88
41.7298	3462.87	2716.41	2073.85	2424.56	2518.02
41.7624	3462.75	2712.41	2073.98	2419.74	2517.44
41.795	3456.01	2712.54	2073.26	2419.75	2514.36
41.8277	3451.58	2711.4	2071.67	2411.89	2514.17
41.8603	3456.69	2709	2069.25	2413.17	2509.65
41.893	3450.48	2708.09	2068.33	2410.34	2509.53
41.9256	3453.64	2706.58	2067.57	2408.93	2513.16
41.9582	3452.28	2703.36	2070.18	2407.78	2506.65
41.9909	3444.67	2705.46	2066.63	2409.89	2511.72
42.0235	3443.2	2699.25	2068.06	2407.15	2509.09
42.0561	3439.48	2699.56	2065.6	2408.01	2504.72
42.0888	3437.47	2696.78	2063.02	2403.35	2505.4
42.1214	3434.15	2691.62	2061.55	2402.71	2503.11
42.154	3432.4	2695.93	2061.17	2401.56	2500.2
42.1867	3431.48	2689.03	2055.13	2404.67	2497.31
42.2193	3429.67	2685.1	2057.24	2398.78	2497.43
42.252	3424.4	2686.21	2060.59	2400.27	2494.31
42.2846	3423.43	2683.36	2058.59	2392.21	2496.98
42.3172	3432.13	2684.27	2054.49	2393.79	2489.82
42.3499	3428.74	2680.15	2053.88	2394.86	2491.39
42.3825	3421.21	2685.48	2057.41	2393.94	2491.73
42.4151	3423.58	2679.37	2050.17	2388.57	2493.73
42.4478	3416.01	2673.78	2047.19	2384.49	2489.93
42.4804	3416.93	2676.84	2049.2	2384.56	2483.69
42.5131	3416.36	2672.73	2048.39	2386.23	2482.62
42.5457	3412.25	2672.93	2046.74	2381.13	2482.09
42.5783	3408.33	2672.94	2047.11	2383.95	2484.87
42.611	3410.73	2665.94	2042.86	2381.83	2481.56
42.6436	3402.15	2666.02	2046.79	2380.55	2479.24
42.6762	3402.09	2667.12	2041.64	2377.49	2481.55
42.7089	3405.71	2669.75	2042.64	2376.92	2481.39
42.7415	3405.42	2666.76	2039.13	2372.47	2478.19
42.7742	3401.49	2661.14	2041.76	2377.91	2480.15
42.8068	3394.79	2657.06	2039.8	2371.7	2477.93
42.8394	3393.11	2653.12	2045.69	2368.02	2471.79
42.8721	3390.1	2651.77	2041.79	2364.87	2469.2
42.9047	3386.45	2654.27	2037.59	2363.23	2471.76
42.9373	3385.55	2649.14	2036.57	2364.21	2467.63
42.97	3392.27	2645.56	2042.18	2362.57	2471.55
43.0026	3387.13	2642.89	2039.05	2359.7	2467.36
43.0352	3382.18	2640.33	2036.09	2357.51	2463.01
43.0679	3381.88	2639.8	2032.27	2355.37	2462.4
43.1005	3382.99	2642.59	2033.22	2361.82	2458.52
43.1332	3374.62	2639.51	2028.58	2354.35	2458.61
43.1658	3366.07	2639.03	2028.52	2356.58	2458.84
43.1984	3366.74	2634.07	2028.45	2353.01	2460.99
43.2311	3371.64	2635.6	2030.39	2351.83	2458.18
43.2637	3364.47	2632.72	2024.51	2347	2452.93
43.2963	3357.85	2629.47	2023.24	2352.39	2454.88
43.329	3358.51	2621.41	2020.83	2345.21	2450.53
43.3616	3360.34	2624.26	2021.03	2344.29	2453.43
43.3943	3358.11	2619.76	2020.85	2344.48	2449.01
43.4269	3355.4	2620.39	2020.43	2344.31	2445.3
43.4595	3355.33	2615.78	2018.77	2341.99	2440.91
43.4922	3351.45	2615.9	2016.31	2341.14	2442.88
43.5248	3350.3	2613.8	2014.54	2337.84	2442.96
43.5574	3353.05	2604.2	2009.95	2338.69	2441.04
43.5901	3351.79	2607.37	2009.97	2332.43	2437.66
43.6227	3346.13	2609.23	2009.13	2336.26	2442.08
43.6554	3346.31	2606.99	2010.31	2329.22	2439.43
43.688	3338.13	2608.94	2012.05	2331.68	2436.86
43.7206	3338.63	2604.7	2007.78	2327.32	2434.49
43.7533	3334.92	2606.46	2007.81	2323	2433.61
43.7859	3333.86	2600.92	2005.15	2320.16	2432.01
43.8185	3330.26	2600.31	2005.55	2324.4	2432.07
43.8512	3326.11	2601.65	2002.65	2322.63	2432.71
43.8838	3321.81	2594.99	2003.45	2321.83	2432.15
43.9164	3320	2590.95	2004.38	2319.96	2431.56
43.9491	3317.81	2595.09	1999.56	2315.57	2432.92
43.9817	3316.94	2590.81	1998.62	2311.82	2430
44.0144	3323.04	2591.23	2001.86	2310.29	2428.45
44.047	3319.79	2588.54	2000.08	2308.16	2425.02
44.0796	3313.33	2584.5	1998.38	2306.46	2422.19
44.1123	3305.63	2580	1996.38	2307.73	2422.23
44.1449	3302.93	2579.99	1992.36	2309.54	2419.7
44.1775	3304.93	2577.97	1986.46	2305.4	2417.25
44.2102	3306.28	2579.57	1991.24	2306.43	2414.33
44.2428	3300.5	2575.64	1991.83	2306.52	2414.6
44.2755	3290.93	2572.06	1991.85	2305.16	2415.24
44.3081	3292.11	2569.25	1989.83	2302.52	2414.36
44.3407	3285.09	2569.78	1985.52	2299.38	2411.58
44.3734	3283.2	2569.09	1984.67	2295.42	2407.93
44.406	3283.92	2567.11	1982.43	2292.1	2406.88
44.4386	3283	2563.18	1981.92	2288.53	2407.4
44.4713	3281.34	2556.89	1982.62	2285.05	2403.81
44.5039	3279.92	2553.34	1978.71	2283.77	2399.9
44.5366	3276.92	2555.49	1977.88	2283.21	2402.57
44.5692	3275.57	2556.7	1977.67	2281.72	2402.59
44.6018	3277.26	2553.56	1975.09	2278.8	2398.94
44.6345	3265.88	2556.18	1973.69	2277.17	2399.18
44.6671	3266.06	2553.93	1969.93	2273.99	2395.48
44.6997	3265.22	2553.41	1970.99	2272.48	2397.54
44.7324	3261.68	2551.43	1970.31	2268.94	2394.75
44.765	3261.57	2550.13	1970.03	2273.66	2394.07
44.7977	3254.87	2545.01	1966.9	2269.3	2394.53
44.8303	3253.05	2544.66	1967.94	2271.21	2389.62
44.8629	3246.06	2538.69	1967.58	2264.76	2389.88
44.8956	3247.07	2537.58	1964.02	2262.32	2389.12
44.9282	3243.39	2529.39	1964.65	2263.62	2386.92
44.9608	3235.03	2530.61	1962.18	2260.88	2387.89
44.9935	3234.91	2524.9	1961.64	2253.86	2381.15
45.0261	3237.05	2525.96	1958.13	2255.21	2381.15
45.0587	3230.16	2520.5	1951.87	2249.22	2381.85
45.0914	3229.45	2522.65	1957.1	2246.96	2382.64
45.124	3222.21	2519.97	1956.42	2241.03	2378.85
45.1567	3228.82	2518.43	1953.66	2250.87	2380.09
45.1893	3225.42	2519.82	1952.81	2244.81	2376.09
45.2219	3221.54	2512.55	1952.05	2240.72	2377.3
45.2546	3219.06	2509.32	1952.43	2240.05	2373.14
45.2872	3210.35	2509.18	1951.17	2237.28	2370.18
45.3198	3210.22	2505.47	1950.19	2237.54	2368.85
45.3525	3211.94	2498	1952.21	2235.39	2370.79
45.3851	3212.76	2499.29	1948.88	2234.63	2368.7
45.4178	3208.06	2498.61	1946.86	2232.43	2365.98
45.4504	3204.95	2495.64	1942.9	2227.94	2364.57
45.483	3209.39	2495.74	1943.79	2231.2	2366.29
45.5157	3205.77	2492.34	1942.88	2228.74	2362.8
45.5483	3197.45	2489.91	1943.36	2224.91	2365.43
45.5809	3194.93	2487.99	1937.87	2222.7	2355.74
45.6136	3187.26	2490.96	1939	2219.1	2357.17
45.6462	3184.78	2486.59	1938	2216.89	2352.3
45.6789	3181.11	2480.37	1937.95	2216.61	2356.87
45.7115	3181.79	2474.38	1934.46	2211.28	2353.07
45.7441	3174.14	2475.01	1934.4	2214.5	2353.03
45.7768	3177.52	2472.09	1933.19	2207.6	2350.35
45.8094	3173.56	2472.91	1927.1	2207.44	2351.7
45.842	3171.23	2469.87	1928.96	2205.01	2346.52
45.8747	3166.25	2472.62	1926.52	2205.81	2347.85
45.9073	3164.15	2466.58	1924.41	2201.58	2346.42
45.9399	3163.49	2461.94	1923.51	2198.92	2346.72
45.9726	3158.29	2457.42	1922.96	2195.42	2341.62
46.0052	3163.08	2457.57	1922.31	2195.97	2345.06
46.0379	3159.51	2454.2	1921.78	2195.5	2345.53
46.0705	3151.18	2457.87	1915.19	2190.49	2334.81
46.1031	3145.29	2453.89	1911.55	2191.9	2336.21
46.1358	3145.83	2452.91	1919.7	2194.39	2341.53
46.1684	3144.46	2445.91	1915.18	2185.85	2335.63
46.201	3134.57	2445.69	1911.35	2185.96	2331.68
46.2337	3134.55	2439.47	1908.55	2181.83	2330.34
46.2663	3133.58	2436.03	1910.38	2178.79	2334.38
46.299	3127.83	2433.34	1908.36	2175.4	2332.44
46.3316	3126.17	2429.87	1905.27	2175.78	2325.15
46.3642	3124.44	2430.08	1904.35	2171.78	2321.29
46.3969	3120.68	2429.85	1900.76	2172.33	2318.6
46.4295	3114.98	2427.6	1899.81	2177.03	2317.14
46.4621	3113.3	2423.94	1900.79	2172.9	2316.24
46.4948	3112.07	2419.09	1898.38	2170.03	2315.02
46.5274	3109.76	2420.7	1900.3	2169.95	2317.7
46.5601	3106.58	2421.74	1901.55	2166.66	2315.24
46.5927	3100.28	2415.31	1896.96	2163.84	2309.79
46.6253	3095.8	2412.21	1895.09	2163.15	2311.58
46.658	3093.83	2410.09	1893.92	2160.48	2310.73
46.6906	3096.13	2407.71	1890.34	2158.02	2309.16
46.7232	3090.55	2405.7	1887.25	2152.85	2308.7
46.7559	3088.31	2403.22	1886.78	2152.58	2307.22
46.7885	3085.31	2403.03	1884.81	2150.45	2305.17
46.8211	3082.79	2399.28	1885.65	2147.58	2302.55
46.8538	3079.66	2393.69	1882.19	2145.79	2301.98
46.8864	3069.57	2396.28	1883.13	2141.09	2299.41
46.9191	3067.4	2393.18	1881.85	2136.44	2296.75
46.9517	3066.71	2392.78	1883.43	2133.57	2292.03
46.9843	3058.51	2389.85	1886.06	2131.03	2291.41
47.017	3056.69	2383.91	1879.63	2128.96	2291.44
47.0496	3054.49	2378.4	1877.31	2126.68	2286.24
47.0822	3052.03	2377.91	1872.5	2126.01	2283.37
47.1149	3050.91	2375.68	1871.54	2120.05	2284.04
47.1475	3048.7	2370.33	1873.77	2118.99	2286.09
47.1802	3044.49	2364.17	1873.73	2119.3	2284.38
47.2128	3039.06	2368.05	1871.65	2116.97	2280.56
47.2454	3035.88	2364.3	1868.94	2112.11	2276.96
47.2781	3037.06	2361.75	1866.34	2113.6	2278.61
47.3107	3033.78	2360.82	1865.6	2111.99	2277.5
47.3433	3029.54	2359.94	1865.23	2109.05	2278.3
47.376	3027.09	2354.27	1861.22	2106.74	2274.1
47.4086	3026.79	2351.41	1863.03	2104.52	2271.83
47.4413	3021.7	2346.66	1859.32	2097.08	2267.71
47.4739	3025.56	2349.01	1859.08	2098.31	2269.31
47.5065	3015.76	2346.81	1855.9	2094.3	2269.34
47.5392	3013.86	2343.43	1853.39	2095.39	2260.16
47.5718	3004.58	2339.72	1852.93	2091.81	2260.07
47.6044	3007.83	2335.11	1848.13	2088.61	2259.91
47.6371	3002.58	2332.29	1849.64	2083.47	2256.3
47.6697	2996.94	2330.51	1847.52	2085.07	2259.2
47.7023	2993.88	2326.38	1846.74	2080.19	2254.25
47.735	2987.54	2322.86	1843.86	2080.54	2252.07
47.7676	2987.39	2323.65	1840.95	2076.57	2250.41
47.8003	2982.83	2317.63	1838.87	2074.61	2252.07
47.8329	2976.31	2313.55	1836.79	2072.51	2246.89
47.8655	2979.66	2310.58	1843.58	2077.01	2245.59
47.8982	2974.6	2311.36	1841.13	2069.07	2242.95
47.9308	2976.46	2310.66	1840.29	2069.14	2238.44
47.9634	2967.93	2307.39	1835.64	2063.16	2236.24
47.9961	2961.65	2308.13	1830.36	2067.62	2235.95
48.0287	2959.58	2301.44	1828.46	2062.12	2235.84
48.0614	2956.2	2302.76	1833.38	2057.38	2229.87
48.094	2956.66	2299.47	1829.81	2053.9	2229.13
48.1266	2954.27	2295.65	1830.66	2057.1	2228.33
48.1593	2948.91	2288.9	1826.49	2052.56	2224.87
48.1919	2945.26	2293.44	1824.94	2047.17	2223.08
48.2245	2943.63	2290.64	1822.15	2047.23	2219.32
48.2572	2939.21	2290.07	1821.46	2047.13	2219.94
48.2898	2935.82	2282.72	1817.91	2045.5	2220.05
48.3225	2933.66	2280.16	1817.05	2043	2219.51
48.3551	2930.55	2276.12	1815.56	2039.33	2217.41
48.3877	2926.54	2275.64	1813.69	2040.98	2213.25
48.4204	2921.87	2271.15	1809.35	2036.82	2207.95
48.453	2920.15	2269.55	1811.98	2033.38	2212.01
48.4856	2915.75	2263.14	1809.6	2034.44	2213.19
48.5183	2914.38	2263.24	1805.93	2030.9	2208.74
48.5509	2914	2260.42	1805	2029.04	2204.92
48.5836	2910.33	2258.87	1806.1	2026.52	2202.5
48.6162	2907.64	2257.25	1804.43	2022.22	2197.73
48.6488	2902.51	2252.76	1803.13	2021.35	2196.89
48.6815	2893.11	2248.91	1799.66	2017.08	2196.81
48.7141	2891.68	2248.4	1794.93	2012.45	2195.63
48.7467	2896.63	2247.74	1795.81	2008.63	2191.52
48.7794	2897.61	2242.06	1795.34	2004.76	2186.09
48.812	2885.38	2244.96	1791.65	2004.21	2185.27
48.8446	2884.84	2240.17	1791.15	2005.67	2182.72
48.8773	2877.11	2240	1790.05	2004.96	2183.03
48.9099	2877.28	2235.74	1786.17	2002.97	2177.04
48.9426	2870.3	2232.43	1788.45	2002.06	2178.14
48.9752	2865.56	2228.08	1781.01	2002.98	2173.61
49.0078	2866.96	2228.41	1779.38	1996.23	2172.79
49.0405	2865.6	2221.98	1773.86	1998.02	2170.75
49.0731	2860.85	2224.36	1779.75	1997.07	2167.57
49.1057	2861.28	2221.66	1776.92	1997.03	2165.27
49.1384	2852.91	2217.64	1773.75	1991.66	2164.08
49.171	2850.01	2216.36	1772.71	1992.79	2159.96
49.2037	2845.45	2218.67	1773.93	1984.72	2160.6
49.2363	2846	2208.99	1767.27	1980.41	2159.65
49.2689	2840.97	2210.63	1765.95	1988.2	2155.56
49.3016	2839.56	2205.96	1762.23	1986.28	2154.37
49.3342	2833.4	2210	1760.6	1979.45	2154.63
49.3668	2831.03	2206.25	1758.52	1981.85	2152.29
49.3995	2834.67	2205.46	1763.25	1974.87	2146.4
49.4321	2829.58	2197.85	1758.43	1973.54	2142.76
49.4648	2822.55	2202.24	1755.75	1969.9	2146.09
49.4974	2822.11	2202.58	1756.4	1967.11	2144.37
49.53	2819.54	2196.58	1754.3	1969.67	2138.88
49.5627	2814.92	2195.98	1747.63	1963.22	2133.69
49.5953	2814.77	2194.58	1751.77	1960.07	2137.87
49.6279	2810.85	2185.23	1749.82	1957.64	2134.52
49.6606	2811.57	2189.64	1744.38	1959.47	2129.01
49.6932	2808.61	2186.64	1741.97	1957.29	2127.1
49.7258	2804.1	2183.33	1744.18	1953.83	2125.63
49.7585	2797.7	2179.06	1740.84	1950.71	2118.64
49.7911	2794.06	2175.53	1740.79	1949.58	2120.97
49.8238	2785.94	2174.68	1733.95	1948.44	2119.09
49.8564	2792.2	2177.61	1737.67	1945.25	2118.88
49.889	2789.5	2174.38	1731.95	1945.5	2115.58
49.9217	2785.82	2174.84	1738.86	1946.1	2113.69
49.9543	2785.47	2171.48	1733.02	1944.51	2110.78
49.9869	2785.7	2168.54	1727.14	1941.02	2112.61
50.0196	2781.52	2165.13	1727.82	1939	2107.29
50.0522	2778.07	2165.86	1726.33	1938.61	2107.84
50.0849	2777.42	2165.81	1722.13	1936.25	2101.39
50.1175	2773.43	2159.68	1718.97	1934.56	2095.85
50.1501	2769.85	2159.89	1717.05	1929.94	2090.22
50.1828	2767.61	2155.63	1721.43	1928.05	2095.07
50.2154	2765.72	2154.29	1715.92	1928.46	2091.73
50.248	2761.83	2157.68	1717.41	1930.74	2088.23
50.2807	2758.88	2155.23	1712.32	1930.96	2079.53
50.3133	2757.01	2154.47	1714.17	1924.01	2084.44
50.346	2751.35	2149.62	1710.33	1922.24	2080.82
50.3786	2757.63	2150.74	1712.72	1921.09	2083.38
50.4112	2750.24	2143.87	1708.3	1918.94	2075.86
50.4439	2750.34	2144.45	1708.37	1920.4	2073.27
50.4765	2750.75	2140.54	1704.85	1915.52	2072.32
50.5091	2746.16	2146.88	1700.03	1917.24	2066.85
50.5418	2741.14	2140.78	1702.35	1913.96	2067.38
50.5744	2742.89	2136.33	1697.15	1918.45	2066.08
50.607	2739.56	2134.62	1695.33	1913.17	2061.65
50.6397	2736.79	2139.19	1696.85	1909.95	2062.45
50.6723	2732.44	2137.88	1695.91	1906.89	2055.84
50.705	2729.94	2133.44	1690.48	1910.46	2053.4
50.7376	2724.55	2133.55	1687.68	1906.85	2054.97
50.7702	2730.85	2134.63	1686.61	1908.59	2051.16
50.8029	2726.27	2132.33	1684.88	1902.64	2046.46
50.8355	2725.51	2128.69	1687.28	1906.71	2044.84
50.8681	2721.16	2128.57	1683.99	1905.08	2040.35
50.9008	2721.94	2127.34	1679.25	1903.35	2041.58
50.9334	2719.78	2123.93	1676.23	1905.31	2038.78
50.9661	2723.46	2123.05	1678.7	1902.72	2037.21
50.9987	2718.95	2123.19	1674.67	1898.18	2028.95
51.0313	2718.59	2124.58	1670.57	1901.47	2029.44
51.064	2710.1	2121.58	1669.47	1898.22	2028.6
51.0966	2714.09	2118.54	1671.35	1899.53	2024.39
51.1292	2709.44	2120.39	1670.21	1899.53	2023.58
51.1619	2710.07	2115.04	1669.85	1895.99	2023.32
51.1945	2706.16	2110.85	1664.91	1893.31	2015.32
51.2272	2708.53	2116.75	1663.2	1892.98	2015.87
51.2598	2705.43	2114.47	1661.05	1891.72	2013.64
51.2924	2701.7	2115.56	1664.09	1894.17	2014.2
51.3251	2697.22	2112.88	1657.92	1893.28	2009.79
51.3577	2699.33	2109.71	1658.42	1889.89	2006.53
51.3903	2698.78	2105.77	1657.09	1887.62	2002.21
51.423	2696.09	2108.85	1656.02	1887.32	2002.28
51.4556	2691.57	2107.58	1651.85	1888.18	1998.71
51.4883	2692.79	2104.69	1649.12	1888.35	1996.92
51.5209	2691.05	2103.05	1647.64	1887.76	1993.91
51.5535	2687.7	2101.94	1645.99	1887.58	1991.06
51.5862	2686.87	2101.5	1645.84	1885.6	1993.57
51.6188	2687.49	2104.69	1643.53	1882.77	1991.11
51.6514	2687.33	2102.54	1640.3	1885.51	1988.29
51.6841	2685.95	2100.95	1638.66	1885.64	1984.14
51.7167	2675.96	2099.84	1639.05	1881.87	1982.63
51.7493	2674.89	2097.3	1635.72	1880.16	1980.89
51.782	2673.76	2097.14	1633.2	1879.46	1976.48
51.8146	2672.64	2096.43	1630.43	1880.95	1975.4
51.8473	2672.9	2092.65	1631.27	1880.54	1977.2
51.8799	2674.4	2090.51	1629.8	1877.91	1973.95
51.9125	2671.53	2092.16	1626.41	1875.66	1972.85
51.9452	2662.97	2084.52	1626.68	1874.66	1968.7
51.9778	2666.94	2093.17	1625.37	1880.63	1970.15
52.0104	2661.04	2091.59	1619.38	1877.49	1967.58
52.0431	2661.35	2087.83	1619.92	1872.89	1962.44
52.0757	2659.76	2085.39	1615.33	1869.71	1960.01
52.1084	2663.89	2086.2	1613.45	1869.43	1964
52.141	2663.21	2084.95	1613.62	1862.61	1961.84
52.1736	2657.08	2082.77	1615.52	1862.12	1956.68
52.2063	2652.35	2079.6	1612.46	1858.57	1956.17
52.2389	2657.91	2081.72	1612.92	1861.73	1957.39
52.2715	2657.18	2080.17	1607.53	1860.97	1951.45
52.3042	2654.16	2081.94	1606.09	1863.36	1953.35
52.3368	2652.27	2078.34	1601.55	1858.48	1949.83
52.3695	2648.09	2078.05	1604.02	1859.98	1948.58
52.4021	2646.14	2077.28	1601.59	1857.89	1944.29
52.4347	2648.53	2075.85	1601.7	1859.89	1943.2
52.4674	2649.63	2072.04	1598.65	1852.15	1939.24
52.5	2641.05	2073.65	1596.79	1854.7	1939.25
52.5326	2641.81	2072.19	1594.52	1849.33	1933.43
52.5653	2641.43	2077.99	1597.06	1854.22	1935.52
52.5979	2635.52	2072.89	1598.99	1847.68	1929.78
52.6305	2637.15	2073.28	1594.99	1852.39	1933.32
52.6632	2635.13	2071.97	1594.51	1851.11	1929.46
52.6958	2639.19	2072.9	1588.41	1851.97	1931.25
52.7285	2634.25	2071.64	1589.91	1847.12	1928.67
52.7611	2633.33	2067.49	1588.07	1848.91	1924.67
52.7937	2629.1	2062.21	1591.72	1844.31	1919.56
52.8264	2628.1	2063.68	1589.61	1846.43	1917.41
52.859	2623.63	2058.25	1587.44	1845.73	1920.94
52.8916	2627.64	2057.71	1585.48	1849	1917.08
52.9243	2623.8	2057.89	1581.79	1846.03	1916.52
52.9569	2623.06	2058.45	1582.95	1844.72	1914.76
52.9896	2620.88	2053.73	1580.19	1842.77	1909.4
53.0222	2620.36	2053.88	1579.74	1847.47	1911.57
53.0548	2618.33	2052.64	1580.19	1844.77	1909.81
53.0875	2617.74	2053.74	1576.95	1840.51	1912.23
53.1201	2612.73	2049.03	1576.58	1837.94	1907.97
53.1527	2612.37	2051.08	1575.3	1838.44	1908.68
53.1854	2609.48	2049.1	1576.76	1833.83	1907.57
53.218	2608.28	2048.92	1571.27	1837.54	1906.17
53.2507	2605.22	2046.82	1570.81	1831.12	1897.78
53.2833	2605.5	2043.84	1573.18	1834.86	1901.23
53.3159	2603.44	2043.24	1570.22	1829.9	1899.82
53.3486	2603.7	2043.97	1568.47	1831.74	1899.6
53.3812	2599.13	2045.16	1567.34	1829.11	1898.41
53.4138	2602.75	2044.1	1566.15	1826.7	1896.35
53.4465	2596.89	2039.18	1566.56	1821.63	1895.69
53.4791	2599.76	2044.15	1565.73	1822.44	1891.76
53.5117	2597.45	2041.34	1563.43	1819.99	1892.52
53.5444	2596.48	2041.72	1563.65	1824.49	1895.63
53.577	2593.4	2041.94	1561.55	1821.92	1892.55
53.6097	2588.93	2043.31	1563.91	1820.23	1891.52
53.6423	2591.16	2040.28	1561.49	1820.65	1888.05
53.6749	2594.33	2035.69	1562.49	1821.32	1888.32
53.7076	2595.14	2032.09	1559.05	1820.93	1888.16
53.7402	2595.51	2028.49	1557.35	1823.47	1887.61
53.7728	2590.43	2027.34	1556.93	1820.75	1884.2
53.8055	2585.03	2028.63	1553.69	1814.17	1881.78
53.8381	2586.6	2026.13	1554.67	1814.51	1881.34
53.8708	2589.22	2022.06	1553.22	1814.2	1880.49
53.9034	2585.35	2026.57	1547.94	1813	1883.59
53.936	2580.48	2024.76	1546.74	1812.45	1880.22
53.9687	2585.48	2023.16	1549.82	1810.69	1881.69
54.0013	2579.77	2021.25	1545.64	1810.42	1880.68
54.0339	2574.9	2022.04	1544.88	1810.38	1873.62
54.0666	2573.61	2019.17	1544.06	1808.17	1872.24
54.0992	2577.77	2020.24	1543.96	1809.94	1876.17
54.1319	2577.07	2013.21	1543.23	1805.76	1875.41
54.1645	2575.19	2015.8	1545.19	1804.28	1869.57
54.1971	2571	2013.33	1544.78	1803.26	1869.14
54.2298	2572.04	2017.31	1540.13	1806.68	1864.36
54.2624	2570.28	2016.73	1536.61	1801.64	1863.16
54.295	2570.69	2010.21	1539.4	1803.33	1866.57
54.3277	2568.87	2009.44	1536.49	1801.39	1864.69
54.3603	2568.86	2011.51	1537.11	1801.14	1866.45
54.393	2565.39	2011.77	1536.44	1799.08	1865.64
54.4256	2562.99	2007.87	1540.95	1795.29	1861.25
54.4582	2563.13	2004.25	1535.79	1797.21	1857.73
54.4909	2560.59	2005.3	1531.98	1797.3	1857.45
54.5235	2557.43	2006.34	1529.72	1794.24	1858.36
54.5561	2558.95	2004.92	1531.28	1794	1856.38
54.5888	2554.81	2002.84	1530.28	1792.32	1853.16
54.6214	2553.13	2002.35	1534.13	1793.54	1856.4
54.654	2548.83	2000.52	1529.63	1793.06	1850.85
54.6867	2555.07	1998.12	1532.33	1787.99	1852.93
54.7193	2552.54	1995.54	1529.07	1782.52	1852.02
54.752	2551.68	1997.68	1530.02	1788.93	1847.21
54.7846	2549.39	1994.27	1529.7	1787.6	1846.2
54.8172	2548.06	1998.32	1530.16	1792.86	1851.14
54.8499	2543.2	1991.45	1529.31	1784.77	1848.86
54.8825	2544.63	1994.87	1529.3	1784.89	1851.43
54.9151	2541.84	1989.49	1524.86	1778.17	1847.74
54.9478	2544.44	1991.72	1526.07	1784.08	1846.67
54.9804	2541.12	1990.16	1524.57	1777.19	1846.25
55.0131	2536.12	1989.07	1522.2	1784.82	1843.18
55.0457	2537.77	1986.81	1522.51	1778.87	1841.8
55.0783	2539.11	1987.58	1522.59	1778.41	1842.79
55.111	2537.97	1984.3	1519.12	1770.79	1839.99
55.1436	2535.15	1982.93	1523.53	1775.62	1840.27
55.1762	2534.8	1981.49	1519.47	1773.23	1836.2
55.2089	2532.18	1981.52	1519.67	1773.35	1835.43
55.2415	2532.37	1982.11	1516.38	1769.49	1836.53
55.2742	2530.16	1976.31	1519.23	1776.28	1839.2
55.3068	2527.38	1976.67	1516.12	1772.95	1834.93
55.3394	2528.62	1978.85	1520.23	1774.94	1831.31
55.3721	2527.48	1973.56	1514.77	1771.38	1833.17
55.4047	2522.86	1975.95	1512.48	1773.81	1826.27
55.4373	2524.99	1972.73	1508.94	1771.38	1827.69
55.47	2523	1977.47	1509.22	1776.03	1835.24
55.5026	2523.4	1973	1507.2	1770.15	1830.72
55.5352	2521.78	1974.46	1510.15	1768.61	1828.44
55.5679	2519.05	1967.85	1510.3	1766	1827.55
55.6005	2509.04	1971.31	1503.07	1767.49	1824.9
55.6332	2512.3	1969.22	1502.67	1765.84	1824.78
55.6658	2513.84	1966.9	1503.86	1764.38	1827.61
55.6984	2514.59	1963.44	1502.95	1762.09	1824.02
55.7311	2511.5	1961.05	1504.69	1765.36	1819.02
55.7637	2508.61	1962.21	1502.52	1763.52	1819.28
55.7963	2503.85	1964.57	1500.82	1759.54	1818.9
55.829	2502.62	1963.76	1499.06	1760.45	1816.93
55.8616	2504.54	1962.83	1498.01	1759.65	1820.55
55.8943	2506.52	1961.46	1499.3	1758.18	1819.77
55.9269	2507	1959.89	1499.56	1757.01	1816.08
55.9595	2503.78	1958.94	1500.27	1754.66	1818.08
55.9922	2504.12	1955.65	1498.61	1755.08	1815.75
56.0248	2501.86	1956.62	1495.22	1753.53	1814.23
56.0574	2498.13	1955.06	1494.12	1752.9	1811.97
56.0901	2494.42	1954.66	1493.4	1752.66	1809.44
56.1227	2491.22	1951.71	1490.16	1750.81	1809.68
56.1554	2491.22	1952.53	1492.77	1753.37	1809.92
56.188	2491.48	1952.46	1491.66	1749.83	1808.29
56.2206	2494.11	1948.05	1494.43	1749.04	1806.25
56.2533	2491.78	1946.62	1490.72	1749.69	1806.46
56.2859	2486.38	1944.11	1491.26	1749.97	1804.12
56.3185	2483.59	1943.59	1487.73	1747.78	1804.97
56.3512	2488.15	1945.55	1490.51	1747.98	1807.16
56.3838	2486.56	1943.75	1487.21	1744.47	1805.16
56.4164	2484.83	1940.2	1485.33	1744.08	1802.48
56.4491	2480.14	1937.08	1483.2	1741.56	1799.32
56.4817	2482.46	1942.14	1485.75	1740.3	1796.52
56.5144	2479.69	1939.12	1482.89	1738.6	1794.71
56.547	2478.34	1938.98	1483.18	1742.37	1798.78
56.5796	2476.64	1935.37	1481.41	1736.6	1796.39
56.6123	2480.26	1937.03	1480.62	1731.95	1799.67
56.6449	2472.7	1937.77	1476.46	1734.33	1790.74
56.6775	2473.36	1935.06	1478.78	1736.27	1792.2
56.7102	2471.69	1936.03	1480.01	1733.37	1788.18
56.7428	2473.72	1937.49	1479.57	1730.67	1790.18
56.7755	2469.51	1933.91	1476.72	1731.56	1786.8
56.8081	2471.62	1932.5	1478.79	1729.32	1789.73
56.8407	2469.38	1928.64	1473.37	1729.48	1786.52
56.8734	2464.12	1930.76	1475.72	1729.55	1790.04
56.906	2465.84	1926.02	1477.2	1725.5	1784.89
56.9386	2464.71	1928.35	1473.74	1724.69	1786.72
56.9713	2462.57	1926.25	1472.25	1728.59	1785.28
57.0039	2459.98	1927.02	1474.22	1727.81	1781.19
57.0366	2458.45	1926.02	1468.08	1724.44	1778.07
57.0692	2458.48	1925.15	1472.24	1728.22	1782.56
57.1018	2454.67	1920.96	1469.11	1726.77	1778.42
57.1345	2458.38	1921.33	1466.37	1722.13	1775.63
57.1671	2454.81	1919.17	1466.27	1721.31	1775.69
57.1997	2453.19	1917.1	1467.83	1721.8	1773.2
57.2324	2450.73	1917.2	1465.17	1718.76	1770.94
57.265	2453.64	1917.09	1467.7	1722.1	1773.73
57.2977	2450.59	1915.5	1465.27	1720.89	1773.84
57.3303	2448.57	1915.45	1462.88	1719.9	1772.46
57.3629	2447.34	1915.4	1461.79	1718.81	1769.53
57.3956	2444.73	1913.87	1460.87	1715.24	1768.99
57.4282	2443.79	1913.94	1462.19	1715.49	1769.94
57.4608	2441.71	1912.07	1460.88	1715.17	1766.8
57.4935	2440.55	1909.54	1460.37	1713.78	1763.91
57.5261	2434.94	1906.84	1457.98	1710.29	1760.84
57.5587	2438.46	1906.69	1457.09	1714.5	1765.66
57.5914	2435.92	1903.13	1451.51	1708.66	1763.78
57.624	2436.15	1904.34	1455.52	1715.7	1765.83
57.6567	2435.27	1898.48	1451.25	1710.48	1761.47
57.6893	2433.49	1900.96	1451.74	1706.92	1761.18
57.7219	2433.56	1893.67	1449.07	1702.97	1759.53
57.7546	2427.3	1899.38	1452.52	1706.24	1761.24
57.7872	2425.52	1898.82	1449.24	1701.86	1758.05
57.8198	2423.51	1897.21	1450.17	1702.93	1758.51
57.8525	2419.4	1895.39	1446.28	1701.53	1759.03
57.8851	2423.98	1895.7	1451.04	1703.64	1755.72
57.9178	2421.55	1889.73	1449.27	1698.33	1755.27
57.9504	2422.91	1895.03	1446.35	1697.13	1755.5
57.983	2418.89	1895.04	1446.99	1688.55	1753.17
58.0157	2421.62	1893.79	1447.63	1697.13	1754.92
58.0483	2418.82	1887.98	1442.67	1688.88	1751.55
58.0809	2412.87	1891.33	1446.23	1698.03	1753.93
58.1136	2412.47	1887.31	1441.61	1693.07	1751.04
58.1462	2411.27	1885.14	1445.54	1693.34	1746.17
58.1789	2410.37	1882.38	1441.32	1689.82	1743.22
58.2115	2412.38	1887.95	1441.68	1693.63	1745.28
58.2441	2410.84	1883.29	1437.18	1689.89	1745.02
58.2768	2406.54	1884.77	1442.3	1688.69	1745.66
58.3094	2402.99	1884.78	1438.39	1685.24	1742.7
58.342	2405.46	1882.45	1437.82	1692.49	1738.16
58.3747	2407.51	1880.3	1437.5	1684.78	1737.53
58.4073	2402.84	1881.84	1438.1	1684.04	1741.95
58.4399	2400.05	1878.19	1436.12	1680.41	1739.36
58.4726	2402.17	1880.06	1438.65	1686.2	1739.99
58.5052	2396.37	1874.15	1432.66	1676.74	1735.63
58.5379	2401.64	1877.75	1433.72	1684.08	1733.53
58.5705	2397.84	1874.45	1431.36	1679.18	1731.76
58.6031	2393.91	1876.82	1430.01	1675.16	1731.4
58.6358	2392.65	1872.03	1429.61	1673.86	1728.58
58.6684	2394.22	1874.29	1429.73	1677.1	1730.24
58.701	2394.64	1870.31	1427.68	1673.5	1727.69
58.7337	2392	1870.47	1431.47	1675.49	1728.96
58.7663	2389.38	1867.42	1425.61	1673.96	1727.28
58.799	2382.51	1868.26	1423.4	1671.99	1727.65
58.8316	2382.88	1866.86	1424.02	1669.61	1727.13
58.8642	2390.12	1866.74	1425.05	1669.5	1723.74
58.8969	2384.84	1860.16	1424.57	1667.39	1721.85
58.9295	2380.64	1863.28	1423.73	1668.49	1723.84
58.9621	2380.65	1859.78	1422.29	1664.39	1722.54
58.9948	2383.09	1861.62	1424.45	1662.2	1721.84
59.0274	2381.6	1859.42	1424.34	1663.85	1720.77
59.0601	2380.53	1864.85	1422.51	1664.17	1719.02
59.0927	2375.36	1860.15	1421.55	1660.46	1715.2
59.1253	2372.24	1858.81	1421.78	1661.65	1717.48
59.158	2373.25	1854.94	1419.79	1658.57	1717.76
59.1906	2371.47	1855.74	1418.78	1657.66	1718.4
59.2232	2365.76	1855.98	1418.49	1657.25	1715.95
59.2559	2367.68	1854.43	1416.3	1656	1714.41
59.2885	2369.22	1850.3	1415.9	1656.44	1712.48
59.3211	2366.24	1849.6	1417.35	1655.71	1709.07
59.3538	2361.72	1848.33	1417.97	1652.9	1708.22
59.3864	2362.22	1848.56	1418.73	1650.56	1708.79
59.4191	2360.42	1849.09	1413.52	1648.42	1710.18
59.4517	2359.84	1851.42	1411.69	1648.1	1707.57
59.4843	2357.64	1850.97	1412.93	1648.91	1703.65
59.517	2354.03	1844.74	1410.64	1648.72	1703.42
59.5496	2353.97	1842.83	1409.76	1647.63	1703.69
59.5822	2352.56	1843.46	1410.78	1646.64	1701.54
59.6149	2350.56	1841.87	1412.05	1646.79	1699.31
59.6475	2347.74	1839.43	1410.96	1644.96	1698.75
59.6802	2345.81	1837.71	1407.66	1643.75	1697.87
59.7128	2345.74	1835.5	1404.83	1643	1696.98
59.7454	2349.23	1838.37	1404.59	1640.97	1696.76
59.7781	2347.11	1835.87	1402.95	1641.6	1695
59.8107	2344.92	1833.14	1402.62	1643.2	1694.35
59.8433	2345.66	1830.8	1401.44	1639.51	1691.7
59.876	2345.76	1833.28	1400.77	1639.08	1689.17
59.9086	2342.14	1831	1399.18	1638.22	1687.65
59.9413	2338.75	1831.86	1400.72	1637.49	1691.26
59.9739	2338.47	1833.54	1398.57	1635.93	1690.04
60.0065	2335.47	1829.08	1397.99	1635.54	1693.06
60.0392	2336.51	1829.55	1398.06	1631.1	1690.37
60.0718	2331.77	1826.77	1398.3	1633.34	1687.02
60.1044	2330.62	1822.67	1396.87	1629.79	1684.17
60.1371	2329.66	1821.98	1391.84	1631.17	1686.79
60.1697	2327.48	1819.59	1390.32	1627.16	1683.1
60.2023	2332.8	1824.25	1394	1626.98	1683.68
60.235	2329.29	1820.52	1391.43	1626.42	1682.38
60.2676	2326.15	1822.08	1393	1627.17	1682.67
60.3003	2326.34	1821.74	1390.42	1624.94	1678.76
60.3329	2324.37	1822.32	1388.84	1624.09	1681.19
60.3655	2325.69	1816.07	1387.94	1620.1	1679.24
60.3982	2320.59	1818.59	1389.04	1623.46	1677.7
60.4308	2319.71	1815.4	1383.74	1621.35	1672.61
60.4634	2318.62	1816.24	1384.95	1624.47	1674.94
60.4961	2313.22	1814.59	1383.03	1615.75	1671.86
60.5287	2316.93	1815.01	1383.87	1620.47	1669.74
60.5614	2312.03	1812.18	1382.86	1619.41	1668.15
60.594	2307.63	1811.49	1383.08	1619.13	1669.41
60.6266	2306.4	1810.12	1380.74	1612.5	1664.91
60.6593	2308.48	1808.78	1379.95	1615.52	1671.17
60.6919	2305.15	1804.92	1378.63	1612.78	1665.81
60.7245	2304.14	1806.89	1378.64	1615.83	1664.36
60.7572	2305.56	1803.56	1374.24	1612.49	1665.46
60.7898	2304.1	1804.87	1379.8	1608.83	1662.56
60.8225	2297.23	1804.27	1375.99	1608.63	1659.04
60.8551	2300.17	1803.05	1380.15	1612.36	1660.1
60.8877	2302.5	1805.02	1375.18	1610.12	1658.41
60.9204	2299.28	1802.81	1377.38	1608.61	1659.66
60.953	2298.23	1796.7	1374.94	1605.33	1659.27
60.9856	2300	1799.34	1373.26	1607.04	1657.26
61.0183	2297.06	1794.39	1367.71	1603.43	1656.9
61.0509	2293.02	1799.63	1371.1	1604.09	1656.08
61.0836	2292.29	1793.69	1370.4	1602.6	1652.36
61.1162	2294.71	1797.35	1368.16	1604.02	1656.67
61.1488	2288.12	1791.26	1364.8	1597.86	1648.51
61.1815	2289.19	1798.9	1367.38	1598.5	1653.93
61.2141	2287.2	1794.19	1365.29	1595.29	1650.28
61.2467	2283.52	1792.81	1365.65	1599.26	1647.54
61.2794	2283.43	1787.31	1365	1595.31	1647.93
61.312	2278.59	1789.52	1364.49	1596.07	1647.87
61.3446	2275.71	1786.81	1362.39	1594.89	1646.81
61.3773	2282.15	1789.89	1364.15	1596.47	1648.09
61.4099	2275.86	1791.14	1364.15	1593.32	1642.59
61.4426	2278.02	1790.68	1361.04	1591.89	1643.94
61.4752	2273.79	1784.53	1359.13	1586.81	1641.22
61.5078	2277.55	1780.01	1357.19	1589.59	1642.62
61.5405	2274.65	1778.07	1358.27	1587.05	1639.06
61.5731	2270.07	1780.88	1360.57	1589.33	1640.24
61.6057	2268.07	1775.58	1357.12	1583.26	1635.33
61.6384	2271.59	1778.27	1358.84	1590.11	1639.96
61.671	2266.58	1774.96	1354.09	1583.72	1631.96
61.7037	2266.21	1774.97	1355.44	1584.98	1639.17
61.7363	2264.27	1774.27	1352.46	1579.52	1634.33
61.7689	2267.66	1776.62	1355.61	1583.83	1631.84
61.8016	2263.79	1770.57	1350.87	1579.77	1630.72
61.8342	2262.18	1772.7	1357.61	1582.97	1630.99
61.8668	2262.17	1770.73	1352.47	1578.67	1629.01
61.8995	2258.7	1775.99	1351.88	1580.96	1629.82
61.9321	2257.93	1769.59	1348.22	1575.99	1627.42
61.9648	2255.17	1770.86	1348.3	1578.1	1628.02
61.9974	2252.57	1768.98	1348.7	1577.26	1624.98
62.03	2251.74	1765.05	1345.12	1578.34	1623.86
62.0627	2250.45	1762.53	1342.41	1576.52	1624.81
62.0953	2250.97	1763.52	1347.1	1576.97	1626.4
62.1279	2247.04	1760.3	1344.26	1573.18	1621.97
62.1606	2247.59	1761.71	1342.51	1570.8	1619.69
62.1932	2242.96	1757.43	1341.88	1570.02	1616.92
62.2258	2243.63	1757.21	1342.89	1567.7	1617.13
62.2585	2243.7	1756.85	1341.51	1565.34	1618.88
62.2911	2239.19	1754.42	1339.95	1565.91	1619.27
62.3238	2239.21	1751.85	1339.83	1564.57	1618.86
62.3564	2238.87	1752.04	1340.07	1562.87	1616.29
62.389	2234.11	1752.42	1340.95	1564.38	1614.13
62.4217	2231.34	1746.7	1338.06	1562.48	1613.05
62.4543	2236.33	1751.88	1336.68	1559.49	1613.68
62.4869	2231.64	1748.64	1334.46	1557.72	1612.11
62.5196	2233.41	1748.42	1335.72	1561.23	1613.39
62.5522	2228.53	1744.46	1332.29	1557.45	1608.76
62.5849	2226.47	1744.6	1333.69	1558.96	1608.53
62.6175	2228.12	1739.68	1330.19	1548.87	1604.04
62.6501	2230.29	1747.38	1333.64	1556.83	1603.97
62.6828	2227.61	1740.91	1332.95	1554.99	1601.69
62.7154	2226.51	1745.37	1331.23	1554.46	1603.76
62.748	2223.33	1744.06	1325.06	1552.17	1601.88
62.7807	2221.6	1744.29	1329.21	1549.89	1604.01
62.8133	2222.23	1739.45	1326.25	1547.05	1601.54
62.846	2219.64	1739.12	1327.32	1552.68	1598.69
62.8786	2218.54	1735.49	1326.35	1552.41	1598.92
62.9112	2220.74	1740.43	1327.14	1550.23	1600.49
62.9439	2216.63	1736.23	1321.1	1546.17	1597.09
62.9765	2212.29	1736.08	1321.87	1548.08	1596.11
63.0091	2208.92	1731.85	1318.92	1543.21	1591.46
63.0418	2212.88	1733.66	1322.21	1545.2	1595.62
63.0744	2209.82	1729.14	1319.18	1544.51	1592.96
63.107	2214.35	1735.81	1319.74	1542.89	1592.29
63.1397	2208.57	1727.27	1318.48	1539.9	1588.11
63.1723	2204.38	1733.53	1318.81	1544.29	1592.24
63.205	2203.68	1727.1	1315.26	1540.3	1588.43
63.2376	2202.42	1728.67	1318.01	1538.15	1592.65
63.2702	2200.3	1725.46	1313.2	1537.81	1588.65
63.3029	2204.01	1725	1315.98	1536.02	1592
63.3355	2197.81	1719.05	1311.28	1534.34	1584.22
63.3681	2200.27	1720.53	1315.58	1538.6	1584.72
63.4008	2196.71	1717.38	1312.16	1535	1580.64
63.4334	2202.05	1719.7	1313.03	1531.92	1581.06
63.4661	2195.96	1715.98	1310.61	1529.78	1580.01
63.4987	2188.84	1713.07	1311.23	1531.7	1581.59
63.5313	2187.67	1710.4	1310.11	1532.15	1578.82
63.564	2192.6	1714.01	1308.43	1531.63	1578.63
63.5966	2189.39	1711.67	1307.12	1527.64	1577.31
63.6292	2185.81	1711.55	1308.24	1528.96	1574.79
63.6619	2182.02	1710.09	1307.06	1526.47	1572.44
63.6945	2179.41	1707.22	1305.66	1523.81	1571.13
63.7272	2183.7	1706.76	1303.44	1526.81	1570.74
63.7598	2182.84	1705.29	1301.78	1524.72	1569.02
63.7924	2180.57	1703.91	1302.54	1522.38	1569.24
63.8251	2179.24	1700.53	1303.08	1521.52	1569.66
63.8577	2176	1699.09	1299.13	1520.33	1567.88
63.8903	2177.05	1702.4	1299.76	1523.35	1567.28
63.923	2175.43	1702.44	1300.66	1525.17	1567.93
63.9556	2169.08	1699.48	1296.65	1520.56	1567.08
63.9883	2172	1701.2	1299.42	1515.49	1565.35
64.0209	2170.03	1696.5	1296.06	1512.43	1562.61
64.0535	2167.89	1695.94	1296.02	1516.58	1562.45
64.0862	2168.39	1693.46	1292.05	1513.23	1559.07
64.1188	2169.59	1696.33	1295.42	1516.7	1561.9
64.1514	2165.02	1692.99	1293.65	1510.83	1557.13
64.1841	2161.49	1695.33	1294.44	1513.62	1562.59
64.2167	2160.1	1691.48	1289.54	1512.59	1559.07
64.2493	2162.57	1688.94	1291.8	1509.64	1557.88
64.282	2160.03	1686.91	1286.42	1507.28	1554.77
64.3146	2162.69	1694.02	1291.89	1506.02	1556.1
64.3473	2158.72	1686.21	1286.23	1502.71	1553.22
64.3799	2156.88	1689.68	1289.53	1504.71	1554.49
64.4125	2156.25	1686.33	1285.24	1502.74	1549.26
64.4452	2155.5	1686.91	1291.2	1503.91	1554.01
64.4778	2149.87	1680.91	1287.5	1503.05	1552.87
64.5104	2153.4	1686.2	1284.4	1502.31	1548.58
64.5431	2151.12	1684.14	1280.53	1498.03	1544.15
64.5757	2151.5	1680.7	1281.41	1503.74	1546.55
64.6084	2147.5	1681.9	1278.44	1498.05	1543.11
64.641	2147.23	1679.23	1283.79	1501.36	1544.73
64.6736	2145.09	1675.12	1281.03	1502.81	1541.34
64.7063	2143.16	1676.43	1278.63	1501.43	1542.38
64.7389	2135.65	1674.38	1277.28	1497.39	1537.46
64.7715	2140.4	1675.89	1277.01	1496.88	1537.09
64.8042	2142.55	1672.35	1275.7	1494.28	1538.02
64.8368	2139.74	1673.99	1280.15	1497.57	1537.53
64.8695	2137.32	1669.76	1276.05	1492.99	1535.34
64.9021	2133.04	1672.74	1280.49	1491.7	1535.21
64.9347	2130.74	1669.38	1276.45	1486.44	1532.47
64.9674	2131.1	1669.63	1276.51	1494.08	1536.74
65	2127.14	1667.43	1273.32	1489.75	1531.39
65.0326	2126.81	1667.13	1272.77	1489.07	1532.54
65.0653	2124.8	1664.16	1270.16	1484.79	1528.42
65.0979	2127.88	1665.63	1266.89	1484.79	1524.86
65.1305	2125.16	1660.46	1266.14	1482.9	1523.4
65.1632	2118.48	1664.5	1272.2	1488.43	1528.71
65.1958	2118.01	1662.49	1265.47	1483.66	1526.88
65.2285	2123.13	1662.87	1269.08	1485.36	1528.12
65.2611	2122.58	1662.63	1267.83	1483.76	1525.68
65.2937	2120.78	1663	1264.05	1484.21	1526.18
65.3264	2117.18	1659.95	1263.72	1483.02	1525.52
65.359	2113.32	1655.97	1261.93	1478.79	1519.58
65.3916	2111.81	1655.05	1260.51	1478.5	1515.45
65.4243	2112.04	1651.94	1261.41	1476.25	1516.01
65.4569	2114.7	1651.61	1261.73	1473.44	1517.85
65.4896	2113.79	1650.31	1256.91	1466.02	1514.3
65.5222	2108.57	1648.98	1259.92	1473.54	1517
65.5548	2106.24	1649.98	1257.33	1470.69	1512.56
65.5875	2111.73	1647.06	1257.68	1471.6	1512.83
65.6201	2108.03	1644.24	1251.7	1468.07	1510.22
65.6527	2100.31	1648.07	1256.43	1468.13	1514.34
65.6854	2097.63	1642.56	1251.92	1465.07	1512.29
65.718	2102.72	1643.9	1255.68	1467.48	1513.35
65.7507	2100.34	1644.74	1250.97	1462.23	1507.88
65.7833	2097.6	1640.22	1253.13	1467.05	1514.28
65.8159	2096.64	1638.48	1247.31	1460.78	1513.06
65.8486	2095.12	1645.33	1251.2	1464.31	1509.7
65.8812	2092.46	1640.77	1248.76	1458.81	1505.19
65.9138	2093.63	1639.9	1249.91	1457.6	1503.61
65.9465	2090.04	1637.18	1245.95	1456.25	1500.28
65.9791	2089.16	1636.68	1247.23	1456.39	1501.27
66.0117	2088.8	1632.6	1243.84	1450.13	1500.09
66.0444	2088.7	1636.26	1247.51	1455.08	1505.09
66.077	2087.71	1632.11	1244.08	1451.32	1500.52
66.1097	2089.78	1630.58	1246.77	1458.09	1501.6
66.1423	2085.18	1627.89	1241.41	1448.51	1501.63
66.1749	2086.95	1632.46	1241.61	1453.05	1499.53
66.2076	2085.3	1630.77	1241.88	1449	1494.88
66.2402	2081.6	1627.13	1246.28	1452.8	1501.34
66.2728	2077.87	1625.75	1239.24	1449.89	1497.36
66.3055	2077.21	1623.76	1241.38	1448.35	1493.65
66.3381	2073.99	1622.63	1238.08	1447.18	1493.59
66.3708	2076.09	1628.62	1239.65	1446.01	1488.73
66.4034	2073.65	1624.38	1236.45	1445.7	1489.06
66.436	2072.8	1624.56	1241.01	1444.69	1490.77
66.4687	2068.34	1622.35	1237.93	1442.26	1486.93
66.5013	2071.68	1622.48	1239.03	1447.71	1488.42
66.5339	2069.05	1619.51	1234.46	1442.48	1486.65
66.5666	2072.06	1618.98	1231.4	1444.84	1488.07
66.5992	2067.72	1618.36	1230.97	1440.19	1486.1
66.6319	2066.92	1618.3	1232.49	1439.3	1486.54
66.6645	2064.56	1615.42	1228.93	1437.91	1484.04
66.6971	2061.06	1615.17	1231.5	1440.34	1483.29
66.7298	2059.73	1610.37	1229.69	1435.84	1479.91
66.7624	2058.48	1611.9	1225.84	1431.96	1482.26
66.795	2056.45	1610.63	1224.37	1430.64	1479.06
66.8277	2056.87	1614.44	1227.91	1432.27	1478.56
66.8603	2053.41	1609.44	1225.8	1429.53	1476.81
66.893	2053.54	1612.87	1225.58	1431.48	1477.54
66.9256	2050.25	1607.61	1224.43	1428.71	1474.73
66.9582	2053.13	1611.83	1224.44	1427.94	1473.58
66.9909	2049.5	1606.82	1223.52	1425.04	1473.04
67.0235	2049.47	1604.46	1222.46	1423.71	1473.37
67.0561	2047.9	1601.57	1221.76	1426.14	1473.71
67.0888	2046.99	1600.86	1222.05	1428.04	1474.09
67.1214	2046.23	1605.08	1220.98	1426.32	1472.48
67.154	2046.27	1606.72	1221.04	1423.9	1470.92
67.1867	2044.69	1603.19	1220.32	1423.28	1470.46
67.2193	2040.5	1598.79	1218.27	1423.68	1469.19
67.252	2040.37	1598.81	1217.56	1422.1	1468.2
67.2846	2039.96	1598.9	1217.34	1420.15	1467.79
67.3172	2036.67	1596.44	1214.79	1417.71	1466.16
67.3499	2036.31	1592.86	1211.78	1420.44	1464.42
67.3825	2036.65	1591.47	1212.53	1420.93	1463.74
67.4151	2034.32	1593.53	1212.84	1416.67	1462.49
67.4478	2033.78	1594.12	1211.73	1414.5	1458.67
67.4804	2033.45	1591.04	1209.84	1412.74	1457.9
67.5131	2028.31	1590.54	1209.87	1412.59	1460.98
67.5457	2028.27	1589.97	1208.73	1411.38	1457.53
67.5783	2028.78	1587.68	1207	1410.46	1455.87
67.611	2025.91	1583.39	1203.86	1409.06	1453.25
67.6436	2024.18	1585.87	1208.79	1409.34	1454.06
67.6762	2022.25	1582.22	1207.13	1407.17	1452.99
67.7089	2020	1582.52	1203.71	1407.26	1451.8
67.7415	2018.4	1581.41	1202.05	1404.13	1450.34
67.7742	2020.14	1581.99	1204.26	1408.61	1448.68
67.8068	2018.81	1581.05	1202.62	1406.05	1447.57
67.8394	2021.66	1584.47	1203.59	1407.94	1453.34
67.8721	2018.67	1581.21	1199.92	1406.21	1451.09
67.9047	2014.27	1576.79	1202.05	1405.07	1446.04
67.9373	2008.49	1574.04	1198.08	1402.37	1442.71
67.97	2012.44	1576.23	1199.42	1403.5	1444.96
68.0026	2009.67	1577.23	1194.95	1401.68	1444.2
68.0352	2009.47	1572.99	1199.55	1402.09	1441.5
68.0679	2006.19	1568.39	1198.54	1392.58	1438.07
68.1005	2007.74	1572.38	1195.47	1402.93	1441.82
68.1332	2006.02	1570.8	1192.35	1396.23	1439.17
68.1658	2001.29	1570.17	1192.85	1399.46	1438.09
68.1984	1999.61	1567.7	1192.1	1393.98	1435.49
68.2311	2000.02	1570.33	1194.51	1394.94	1438.66
68.2637	2000.96	1564.71	1191.2	1387.3	1432.36
68.2963	1999	1565.97	1189.85	1391.49	1436.37
68.329	1997.26	1560.89	1188.4	1386.08	1432.56
68.3616	1994.85	1565.51	1194.32	1392.14	1434.46
68.3943	1991.26	1558.45	1188.9	1382.72	1433.44
68.4269	1991.18	1561.65	1185.29	1385.92	1432.02
68.4595	1990.54	1559.48	1184.27	1383.56	1426.61
68.4922	1995.63	1562.24	1190.49	1386.74	1433.26
68.5248	1993.49	1559.73	1185.54	1379	1429.99
68.5574	1988.41	1557.33	1185.23	1384.1	1430.2
68.5901	1985.69	1554.81	1181.12	1378.3	1428.39
68.6227	1985.64	1553.46	1183.96	1382.13	1428.42
68.6554	1983.32	1552.7	1181.25	1377.96	1423.88
68.688	1986.66	1554.56	1183.35	1382.39	1425.06
68.7206	1983.76	1548.83	1181.15	1378.25	1426.48
68.7533	1981.48	1551.58	1178.11	1376.32	1425.85
68.7859	1979.1	1548.4	1176.43	1373.76	1421.48
68.8185	1980.1	1548.14	1177.92	1379.73	1422.42
68.8512	1977.68	1549.31	1178.6	1374.75	1419.63
68.8838	1978.36	1550.01	1178.46	1375.09	1421.88
68.9164	1976.08	1545.75	1177.53	1373.06	1417.63
68.9491	1968.96	1546.43	1177.42	1371.76	1416.44
68.9817	1967.06	1541.72	1171.51	1370.61	1414.47
69.0144	1973.19	1543.05	1175.33	1371.03	1416.68
69.047	1970.26	1538.02	1171.79	1369.86	1413.44
69.0796	1972.85	1546.9	1173.66	1369.36	1416.92
69.1123	1967.54	1541.47	1170.25	1369.98	1410.67
69.1449	1970.67	1539.86	1174.5	1366.91	1416.6
69.1775	1967.62	1537.81	1170.38	1362.39	1410.6
69.2102	1961.48	1538.96	1171.87	1369.18	1412.87
69.2428	1961.89	1537.5	1166.96	1364.02	1408.19
69.2755	1963.37	1539.58	1165.49	1361.93	1409.36
69.3081	1959.28	1535.27	1165.67	1359.73	1407.82
69.3407	1954.14	1536.72	1165.03	1359.58	1407.94
69.3734	1952.49	1533.25	1164.36	1357.13	1405.71
69.406	1958.9	1535.48	1164.85	1356	1407.67
69.4386	1954.29	1530.18	1165.35	1356.36	1401.72
69.4713	1952.56	1532.25	1162.17	1356.37	1405.04
69.5039	1952.95	1527.49	1160.49	1354.77	1398.78
69.5366	1955.21	1532.91	1163.42	1355.13	1401.16
69.5692	1951.18	1525.88	1158.83	1354.54	1399.01
69.6018	1953.31	1524.94	1157.23	1356.58	1398.65
69.6345	1946.21	1524.07	1153.5	1349.73	1398.04
69.6671	1951.45	1527.24	1163.2	1351.05	1401.03
69.6997	1945.57	1523.34	1157.36	1350.93	1393.95
69.7324	1943.99	1521.51	1157.43	1348.22	1392.95
69.765	1943.57	1519.98	1152.24	1347.13	1391.2
69.7977	1936.69	1521.97	1152.83	1348.53	1394.54
69.8303	1935.19	1519.03	1152.71	1346.79	1392.92
69.8629	1939.76	1518.32	1155.48	1347.56	1389.9
69.8956	1936.84	1515.75	1152.94	1343.98	1387.49
69.9282	1937.76	1513.52	1152.28	1343.08	1389.72
69.9608	1934.9	1514.16	1150.32	1342.74	1387.89
69.9935	1930.5	1515.42	1150.13	1341.04	1385.74
70.0261	1929.23	1512.48	1148.27	1338.11	1384.91
70.0587	1928.94	1515	1147.98	1339.36	1384.71
70.0914	1930.75	1512.22	1146.44	1337.24	1381.9
70.124	1928.31	1508.73	1144.94	1336.05	1380.94
70.1567	1928.22	1505.53	1143.79	1334.57	1379.36
70.1893	1926.43	1506.14	1145.77	1333.56	1378.03
70.2219	1924.37	1507.3	1143.42	1331.66	1376.59
70.2546	1924.87	1509.05	1144.1	1333.42	1376.3
70.2872	1924.09	1507.73	1143.65	1333.58	1377.63
70.3198	1923.22	1504.71	1142.99	1329.97	1377.91
70.3525	1922.18	1501.73	1144.99	1326.55	1375.33
70.3851	1920.99	1500.21	1141.19	1328.52	1371.99
70.4178	1919.33	1501.4	1136.77	1331.32	1370.3
70.4504	1916.37	1500.27	1138.66	1331.24	1372.35
70.483	1913.57	1500.53	1139.82	1331.61	1372.45
70.5157	1913.82	1501.04	1139.22	1329.67	1367.53
70.5483	1914.83	1497.84	1135.68	1328.65	1365.17
70.5809	1913.82	1496.43	1134.73	1328.56	1367.41
70.6136	1912.93	1498.24	1136.4	1327.76	1367.69
70.6462	1909.78	1497.5	1135.5	1325.81	1368.7
70.6789	1905.48	1493.73	1133.43	1322.28	1368.21
70.7115	1902.45	1489.95	1131.23	1321.11	1363.71
70.7441	1906.04	1490.84	1133.05	1324.5	1362.93
70.7768	1905.16	1487.21	1129.95	1322.31	1361.34
70.8094	1904.47	1489.64	1129.55	1319.4	1363.94
70.842	1904.08	1488.2	1128.24	1317.03	1362.25
70.8747	1900.18	1488.81	1129.1	1316.85	1359.91
70.9073	1897.66	1484.95	1124.18	1311.11	1356.38
70.9399	1899.11	1489.85	1127.87	1316.22	1361.53
70.9726	1895.22	1485.19	1126.82	1313.07	1358.86
71.0052	1894.18	1492.3	1127.17	1316.03	1360.59
71.0379	1889.82	1487.42	1125.95	1311.32	1353.54
71.0705	1892.79	1487.03	1124.1	1310.21	1355.83
71.1031	1886.9	1483.02	1121.53	1306.78	1351.07
71.1358	1890.4	1479.6	1125.31	1309.6	1354.26
71.1684	1887.27	1476.69	1119.54	1306.36	1347.44
71.201	1889.51	1483.17	1120.84	1309.38	1350.67
71.2337	1885.03	1479.61	1116.97	1304.86	1349.74
71.2663	1881.98	1482.46	1119.16	1304.52	1348.72
71.299	1877.56	1478.02	1119.2	1300.43	1341.86
71.3316	1882.6	1474.28	1117.52	1303.91	1352.06
71.3642	1882.01	1469.43	1114.89	1299.88	1345.8
71.3969	1880.16	1478.64	1117.97	1302.72	1345.41
71.4295	1875.12	1472.95	1115.67	1296.05	1342.12
71.4621	1874.46	1477.36	1115.45	1297.82	1345.04
71.4948	1873.54	1474.84	1111.83	1294.07	1341.96
71.5274	1875.21	1476.76	1115.35	1298.39	1343.53
71.5601	1873.49	1475.07	1113.57	1293.57	1337.55
71.5927	1877.27	1473.47	1112.89	1296.77	1339.17
71.6253	1871.51	1470.57	1109.4	1289.81	1337.04
71.658	1872.79	1469.75	1110.39	1291.61	1341.26
71.6906	1867.89	1471.15	1107.67	1288.31	1334.11
71.7232	1869.89	1470.53	1107.56	1290.62	1337.06
71.7559	1870.35	1468.84	1107.63	1285.05	1334.75
71.7885	1867.18	1464.33	1108.07	1290.38	1335.31
71.8211	1864.56	1462.04	1106.25	1287.56	1333.02
71.8538	1863.71	1465.87	1108.2	1289.27	1334.77
71.8864	1863.44	1464.29	1105.42	1286.76	1332.81
71.9191	1866.75	1461.99	1104.39	1284.64	1335.13
71.9517	1861.42	1458.54	1102.75	1280.84	1333.43
71.9843	1856.5	1459.95	1100.56	1283.79	1329.48
72.017	1857.64	1458.86	1099.49	1281.15	1326.03
72.0496	1860.12	1462.38	1101.47	1280.43	1328.97
72.0822	1856.69	1458.73	1098.27	1278.41	1327.47
72.1149	1853.82	1458.18	1099.35	1278.38	1326.66
72.1475	1853.2	1457.42	1101.14	1277.81	1324.42
72.1802	1856.78	1458.02	1102.88	1277.45	1323.37
72.2128	1854.06	1454.13	1099.9	1276.09	1323.12
72.2454	1848.76	1455.86	1097.1	1277.4	1323.44
72.2781	1847.02	1453.75	1095.58	1273.8	1322.14
72.3107	1845.63	1452.91	1095.12	1271.96	1322.63
72.3433	1848.67	1450.26	1093.16	1270.52	1320.46
72.376	1848.4	1448.68	1092.53	1272.84	1320.72
72.4086	1841.85	1448.98	1093.04	1273.43	1320.62
72.4413	1840.16	1447.25	1091.27	1268.88	1316.08
72.4739	1840.95	1442.02	1088.8	1270.63	1314.95
72.5065	1834.65	1440.93	1087.54	1270.21	1313.97
72.5392	1837.81	1440.72	1090.87	1270.51	1313.66
72.5718	1838.35	1439.93	1092.53	1267.05	1314.35
72.6044	1838.37	1440.9	1091.06	1267.73	1316.74
72.6371	1834.79	1438.13	1089.01	1266.21	1312.97
72.6697	1835.34	1440.35	1087.43	1264.21	1310.77
72.7023	1831.75	1437.27	1084.82	1261.39	1311.75
72.735	1832.47	1434.16	1084.55	1264.36	1311.14
72.7676	1833.31	1431.54	1081.05	1263.65	1307.89
72.8003	1827.96	1436.29	1085.77	1262.82	1305.19
72.8329	1827.35	1434.88	1084.32	1262.11	1304.1
72.8655	1827.81	1433.69	1083.59	1261.64	1307.22
72.8982	1821.56	1427.34	1080.89	1258.51	1307.84
72.9308	1827.06	1428.33	1079.75	1255.29	1305.2
72.9634	1827.25	1425.43	1079.33	1252.24	1300.65
72.9961	1821.93	1425.97	1081.23	1255.82	1303
73.0287	1820.07	1425.11	1077.67	1252.09	1303.54
73.0614	1817.46	1426.1	1078.35	1251.98	1301.17
73.094	1816.52	1424.92	1078.24	1249.73	1299.65
73.1266	1819.04	1426.91	1077.56	1253.61	1300.45
73.1593	1814.71	1428.44	1074.89	1250.53	1295.48
73.1919	1815.68	1422.09	1076.47	1250.93	1298.24
73.2245	1812.63	1420.55	1074.54	1248.17	1297.28
73.2572	1813.3	1422.57	1073.25	1247.09	1295.33
73.2898	1811.87	1418.47	1067.84	1243.2	1291.83
73.3225	1812.42	1420.21	1071.54	1244.92	1295.05
73.3551	1809.68	1417.6	1069.57	1243.3	1291.41
73.3877	1808.85	1421.48	1069.75	1246.05	1292.14
73.4204	1805.61	1416.86	1068.72	1239.2	1290.6
73.453	1806	1415.63	1066.62	1240.57	1288.49
73.4856	1802.47	1415.29	1068.37	1238.08	1285.75
73.5183	1800.08	1410.55	1068.35	1239.27	1290.91
73.5509	1801.45	1408.93	1065.36	1233.31	1283.7
73.5836	1802.56	1412.91	1067.91	1239.09	1289.57
73.6162	1799.01	1408.36	1063.71	1236.22	1287
73.6488	1796.56	1412.05	1064.87	1239.73	1286.34
73.6815	1793.38	1409.34	1059.52	1235.94	1282.84
73.7141	1796.67	1410.54	1067.64	1238.86	1288.91
73.7467	1794.35	1406.41	1063.51	1231.58	1284.34
73.7794	1795.51	1410.35	1059.71	1235.22	1285.81
73.812	1795.06	1408.36	1059.01	1230.72	1280.77
73.8446	1791.01	1409.72	1063.06	1233.29	1278.88
73.8773	1789.68	1405.53	1056.91	1229.51	1277.75
73.9099	1789.54	1405.12	1061.24	1229.75	1280.67
73.9426	1788.41	1400.09	1058.89	1230.02	1278.2
73.9752	1785.5	1397.7	1056.08	1230.01	1275.78
74.0078	1786.39	1396.06	1055.36	1226.88	1275.4
74.0405	1786.95	1400.35	1056.7	1226.63	1277.37
74.0731	1782.84	1401.94	1057.8	1225.11	1276.16
74.1057	1778.73	1398.09	1056.32	1223.37	1273.4
74.1384	1782.18	1394.47	1056.49	1225.24	1272.58
74.171	1776.69	1389.68	1055.3	1218.67	1267.98
74.2037	1777.26	1394.92	1055.61	1222.98	1274.74
74.2363	1776.86	1392.95	1053.24	1220.42	1270.27
74.2689	1775.27	1393.98	1051.37	1222.46	1269.31
74.3016	1775.7	1389.59	1045.95	1221.4	1265.9
74.3342	1770.67	1392.91	1049.16	1218.75	1268.82
74.3668	1769.17	1388.39	1044.48	1216.28	1265.17
74.3995	1773.03	1387.87	1050.99	1218.16	1269.21
74.4321	1767.85	1383.74	1048.5	1211.98	1263.47
74.4648	1766.93	1390.74	1047.32	1216.2	1264.32
74.4974	1763.69	1384.98	1042.64	1212.45	1261.86
74.53	1767.48	1386.96	1046.85	1216.16	1265.44
74.5627	1765.5	1382.72	1042.82	1211.59	1260.02
74.5953	1761.18	1388.02	1043.86	1215.18	1265.76
74.6279	1762.5	1388.09	1040.85	1212.03	1262.15
74.6606	1762.49	1386.58	1044.36	1210.92	1260.61
74.6932	1760.95	1382.78	1040.37	1211.81	1256.41
74.7258	1754.98	1383.01	1042.2	1209.61	1257.13
74.7585	1756.04	1379.15	1039.55	1205.89	1256.62
74.7911	1757.23	1383.77	1042.37	1206.26	1258.46
74.8238	1758.1	1380.18	1038.24	1205.49	1253.52
74.8564	1758.76	1383.41	1040.37	1205.74	1257.65
74.889	1756.01	1377.98	1036.89	1202.4	1255.88
74.9217	1749.38	1375.72	1036.7	1202.27	1255.27
74.9543	1749.39	1375.44	1036.64	1201.03	1252.37
74.9869	1751.16	1373.41	1037.66	1201.22	1252.55
75.0196	1748.2	1371.81	1034.29	1200.07	1250.8
75.0522	1748.79	1374.93	1033.31	1200.88	1251.86
75.0849	1750.08	1377.25	1032.65	1200.76	1251.53
75.1175	1747.38	1374.48	1029.89	1197.77	1247.26
75.1501	1740.55	1372.46	1029.86	1196.44	1247.13
75.1828	1740.33	1368.94	1024.45	1194.54	1246.1
75.2154	1742.52	1376.17	1029.71	1194.95	1245.2
75.248	1737.77	1373.21	1025.35	1193.29	1241.46
75.2807	1741.81	1368.8	1030.89	1193.06	1244.89
75.3133	1738.14	1366.27	1025.95	1191.57	1240.59
75.346	1733.76	1366.51	1030.04	1191.12	1245.6
75.3786	1732.38	1360.82	1023.56	1189.2	1242.23
75.4112	1741.04	1365.55	1027.92	1191.03	1242.58
75.4439	1737.81	1361.6	1023.25	1187.54	1239.53
75.4765	1736.91	1359.22	1028.37	1190.63	1241.17
75.5091	1734.75	1359.42	1021.78	1184.6	1238.84
75.5418	1731.61	1358.86	1025.38	1184.37	1241.07
75.5744	1726.38	1358.56	1022.08	1183.75	1234.66
75.607	1729.06	1360.91	1024.68	1185.96	1237.81
75.6397	1725.83	1357.31	1020.05	1184.81	1234.69
75.6723	1728.53	1358.4	1022.34	1186.64	1236.95
75.705	1725.7	1355.44	1016.35	1183.69	1238.13
75.7376	1725.47	1354.62	1017.98	1183.31	1236.97
75.7702	1723.6	1350.24	1017.24	1178.3	1231.57
75.8029	1719.59	1358.05	1020.96	1182.01	1234.91
75.8355	1719.5	1352.75	1016.73	1178.35	1230.5
75.8681	1721.39	1356.25	1021.57	1179.93	1233.81
75.9008	1718.8	1350.27	1017.85	1180.67	1227.7
75.9334	1718.9	1353.6	1017.24	1182.77	1232.94
75.9661	1716.16	1351.82	1014.7	1179.29	1226.64
75.9987	1713.3	1350.16	1013.43	1178.8	1225.61
76.0313	1711.96	1347.62	1010.81	1180.23	1224.17
76.064	1712.61	1346.04	1011.83	1179.51	1222.64
76.0966	1713.94	1344.03	1012.34	1177	1224.27
76.1292	1713.15	1343.17	1009.64	1175.6	1221.85
76.1619	1708.89	1345.63	1009.32	1175.28	1219.96
76.1945	1707.35	1342.83	1006.94	1172.52	1217.54
76.2272	1705.1	1344.85	1007.93	1175.97	1222.06
76.2598	1702.21	1343	1006.4	1171.61	1220.67
76.2924	1706.97	1342.53	1006.52	1175.06	1221.05
76.3251	1706.32	1341.78	1004.52	1168.8	1217.13
76.3577	1707.69	1339.37	1005.26	1170.96	1218.69
76.3903	1705.9	1337.7	1001.45	1170.43	1216.33
76.423	1706.33	1340.26	1005.84	1171.51	1219.79
76.4556	1703.83	1338.83	1002.99	1165.02	1215.37
76.4883	1706.7	1334.74	1002.81	1169.46	1220.13
76.5209	1701.59	1333.84	1001.6	1165.2	1216.48
76.5535	1701.4	1334.38	1006.05	1162.37	1214.78
76.5862	1703	1336.91	1000.61	1160.01	1212.52
76.6188	1702.89	1333.23	998.561	1161.13	1211.81
76.6514	1699.84	1331.78	998.245	1159.67	1208.95
76.6841	1697.61	1331.06	998.668	1159.1	1208.31
76.7167	1699.7	1330.41	999.173	1155.68	1208.5
76.7493	1700.92	1328.91	999.091	1152.07	1206.94
76.782	1697.14	1327.78	997.778	1154.74	1207.31
76.8146	1697.75	1326.89	994.454	1153.04	1205.93
76.8473	1693.03	1333.2	994.992	1153.7	1205.61
76.8799	1689.48	1331.27	993.915	1151.35	1203.45
76.9125	1695.9	1329.27	997.121	1152.05	1208.72
76.9452	1691.7	1326.9	994.051	1149.41	1202.21
76.9778	1689.33	1326.36	993.469	1152.16	1206.06
77.0104	1685.69	1324.79	989.935	1148.24	1201.26
77.0431	1680.78	1324.33	990.929	1149.11	1203.92
77.0757	1680.47	1321.16	988.624	1145.15	1201.08
77.1084	1686.81	1324.23	991.177	1151.87	1202.47
77.141	1682	1318.69	987.736	1147.28	1199.03
77.1736	1681.43	1324.27	990.185	1147	1200.78
77.2063	1680.01	1322.77	988	1144.76	1197.72
77.2389	1678.67	1320.63	986.801	1144.35	1196.97
77.2715	1677.85	1318.06	986.652	1144.01	1197.71
77.3042	1676.83	1316.65	985.51	1142.43	1196.26
77.3368	1674.53	1317.95	985.421	1140.54	1196.31
77.3695	1672.25	1316.25	984.459	1137.95	1195.62
77.4021	1670.3	1317.82	983.585	1137.89	1194.64
77.4347	1669.23	1316.36	980.536	1136.1	1191.9
77.4674	1666.82	1314.38	980.974	1139.3	1192.49
77.5	1666.49	1311.72	978.881	1137.63	1190.1
77.5326	1667.53	1313.56	982.054	1138.29	1190.99
77.5653	1666.41	1312.94	981.428	1135.48	1189.56
77.5979	1665.53	1311.8	979.7	1137.47	1189.66
77.6305	1662.09	1310	976.759	1133.9	1185.33
77.6632	1660.06	1309.51	977.88	1134.9	1188.41
77.6958	1654.55	1308.44	977.004	1132.07	1186.24
77.7285	1657.7	1309.14	976.52	1130.34	1184.81
77.7611	1657.09	1310.88	973.756	1128.76	1184.8
77.7937	1653.99	1308.86	975.665	1129.46	1185.38
77.8264	1655.32	1306.13	972.688	1127.59	1182.77
77.859	1654.09	1308.7	975.557	1127.77	1181.93
77.8916	1652.43	1305.97	973.903	1124.88	1180.02
77.9243	1650.62	1306.66	974.068	1129.49	1180.32
77.9569	1650.12	1303.06	969.83	1126.39	1178.64
77.9896	1649.06	1301.81	972.884	1126.32	1180.28
78.0222	1651.23	1302.7	968.691	1124.86	1178.38
78.0548	1646.35	1300.19	970.361	1125.99	1180.4
78.0875	1643.17	1299.72	966.269	1120.05	1174.06
78.1201	1645.62	1300.85	967.869	1122.44	1179.48
78.1527	1642.19	1297.5	967.807	1120.94	1174.96
78.1854	1644.04	1296.92	970.6	1123.08	1176.24
78.218	1644.63	1295.4	965.002	1118.64	1170.64
78.2507	1639.61	1295.76	965.529	1121.1	1176.69
78.2833	1641.56	1292.7	962.227	1116.32	1173.01
78.3159	1639.83	1294.43	967.67	1121.4	1172.62
78.3486	1635.42	1295.63	965.705	1117.78	1171.37
78.3812	1636.67	1297.42	968.805	1116.54	1175.13
78.4138	1635.75	1291.95	964.18	1114.22	1170.1
78.4465	1631.09	1290.78	962.408	1115.04	1169.7
78.4791	1629.92	1290.4	961.983	1111.24	1166.76
78.5117	1630.03	1291.28	961.164	1111.65	1166.43
78.5444	1631.41	1290.07	960.193	1112.15	1165.27
78.577	1629.26	1288.93	958.972	1113.27	1157.15
78.6097	1628.16	1287.08	956.395	1109.77	1151.31
78.6423	1629.49	1288.96	957.853	1107.91	1149.86
78.6749	1625.58	1286.84	958.243	1107.98	1149.79
78.7076	1620.86	1283.09	956.69	1107.37	1149.82
78.7402	1626.45	1285.15	955.536	1108.19	1149.27
78.7728	1623.97	1281.81	952.751	1102.13	1142.46
78.8055	1622.69	1284.3	957.37	1103.53	1149.71
78.8381	1621.58	1282.36	955.198	1102.06	1144.6
78.8708	1621.47	1286.95	953.944	1100.54	1143.84
78.9034	1617.75	1283.68	949.403	1098.89	1141.7
78.936	1619.62	1283.29	953.13	1103.97	1142.1
78.9687	1616.84	1281.63	949.891	1097.93	1138.57
79.0013	1618.9	1277.69	951.013	1099.3	1141.64
79.0339	1616.39	1274.15	951.74	1098.03	1137.45
79.0666	1617.9	1277.78	950.078	1101.15	1139.55
79.0992	1613.43	1276.55	948.397	1099.04	1135.05
79.1319	1610.21	1274.05	951.164	1098.56	1134.94
79.1645	1614.31	1272.29	948.368	1094.84	1133.04
79.1971	1613.23	1275.79	947.095	1095.42	1137.26
79.2298	1610.49	1273.83	947.189	1091.58	1134.54
79.2624	1612.58	1273.05	952.261	1097.37	1134.96
79.295	1608.09	1269.56	948.204	1093.57	1129.82
79.3277	1606.97	1270.74	946.442	1090.18	1129.62
79.3603	1607.02	1271.07	946.547	1091.13	1128.79
79.393	1605.1	1272.32	948.799	1095.08	1130.96
79.4256	1603.84	1269.59	944.496	1091.56	1125.54
79.4582	1603.51	1266.78	941.169	1090.09	1122.68
79.4909	1602.93	1266.75	941.544	1088.49	1123.62
79.5235	1600.83	1267.35	941.77	1085.7	1122.49
79.5561	1601.82	1265.99	941.906	1086.81	1122.8
79.5888	1601.42	1266.01	940.416	1086.56	1123.26
79.6214	1598.61	1265.5	938.574	1085.54	1122.66
79.654	1595.53	1263.74	937.355	1083.47	1121.05
79.6867	1596.32	1266.6	938.292	1082.82	1120.76
79.7193	1595.38	1264.74	939.017	1081.55	1120.45
79.752	1595.41	1263.5	938.554	1082.02	1119.09
79.7846	1591.98	1259.89	936.734	1079.82	1116.16
79.8172	1591.04	1264.57	936.425	1083.55	1117.61
79.8499	1588.08	1261.56	934.951	1079.96	1114.87
79.8825	1591.27	1259.29	934.973	1078.87	1114.33
79.9151	1588.83	1257.77	933.236	1076.63	1111.08
79.9478	1586.05	1261.55	933.305	1079.45	1112.48
79.9804	1586	1260.93	932.937	1076.69	1110.51
80.0131	1588.8	1257.15	934.402	1075.98	1110.74
80.0457	1585.97	1253.73	933.379	1074.76	1106.91
80.0783	1585.05	1255.99	931.15	1077.13	1107.86
80.111	1580.4	1253.83	933.508	1073.42	1104.01
80.1436	1586.43	1259.13	934.74	1073.59	1108.73
80.1762	1584.89	1253.58	930.179	1070.67	1103.82
[truncated: 301 more rows]

## Sheet: 330 nm (1st derivative)
	First derivative of fluorescence counts at 330 nm
Temperature, °C	mCherry-VPS34-CII WT	mCherry-VPS34-CII (VPS34 199-REIE-202 > AAAA)	mCherry-VPS34-CII (VPS34 199-REIE-202 > ERIR)	mCherry-VPS34-CII (VPS15 579-SHMIT-583 > DDMIE)	mCherry-VPS34-CII (VPS34 199-REIE-202 > ERIR and VPS15 579-SHMIT-583 > DDMIE)
15	-47.6813	-105.17	-58.0516	-91.5097	-54.1739
15.0326	-47.8622	-104.952	-57.9758	-91.3716	-54.0823
15.0653	-48.0434	-104.733	-57.9	-91.2335	-53.9907
15.0979	-48.2248	-104.514	-57.8241	-91.0951	-53.8992
15.1305	-48.4064	-104.295	-57.7481	-90.9566	-53.8078
15.1632	-48.5882	-104.077	-57.6722	-90.8179	-53.7164
15.1958	-48.7702	-103.858	-57.5961	-90.679	-53.6252
15.2285	-48.9524	-103.639	-57.5201	-90.54	-53.534
15.2611	-49.1348	-103.42	-57.444	-90.4008	-53.4429
15.2937	-49.3174	-103.201	-57.3678	-90.2614	-53.3519
15.3264	-49.5001	-102.983	-57.2916	-90.1219	-53.2609
15.359	-49.6831	-102.764	-57.2154	-89.9822	-53.1701
15.3916	-49.8663	-102.545	-57.1392	-89.8424	-53.0794
15.4243	-50.0496	-102.326	-57.0629	-89.7023	-52.9887
15.4569	-50.233	-102.107	-56.9866	-89.5622	-52.8981
15.4896	-50.4167	-101.888	-56.9103	-89.4218	-52.8077
15.5222	-50.6005	-101.669	-56.834	-89.2813	-52.7173
15.5548	-50.7844	-101.451	-56.7577	-89.1407	-52.627
15.5875	-50.9684	-101.232	-56.6814	-88.9999	-52.5369
15.6201	-51.1526	-101.013	-56.6052	-88.859	-52.4468
15.6527	-51.3368	-100.794	-56.5289	-88.7179	-52.3568
15.6854	-51.5212	-100.576	-56.4527	-88.5766	-52.2669
15.718	-51.7057	-100.357	-56.3764	-88.4352	-52.1772
15.7507	-51.8902	-100.138	-56.3003	-88.2937	-52.0875
15.7833	-52.0748	-99.9197	-56.2241	-88.1521	-51.9979
15.8159	-52.2594	-99.7012	-56.148	-88.0102	-51.9084
15.8486	-52.4442	-99.4826	-56.072	-87.8683	-51.8189
15.8812	-52.6289	-99.2642	-55.996	-87.7262	-51.7296
15.9138	-52.8137	-99.0457	-55.9201	-87.584	-51.6403
15.9465	-52.9985	-98.8273	-55.8442	-87.4416	-51.5511
15.9791	-53.1833	-98.6089	-55.7684	-87.2991	-51.462
16.0117	-53.3681	-98.3906	-55.6927	-87.1565	-51.3729
16.0444	-53.5529	-98.1722	-55.6171	-87.0137	-51.2839
16.077	-53.7377	-97.9539	-55.5416	-86.8708	-51.1949
16.1097	-53.9225	-97.7355	-55.4662	-86.7277	-51.106
16.1423	-54.1073	-97.5172	-55.3908	-86.5845	-51.0171
16.1749	-54.292	-97.2988	-55.3156	-86.4411	-50.9282
16.2076	-54.4767	-97.0804	-55.2405	-86.2976	-50.8393
16.2402	-54.6613	-96.862	-55.1655	-86.1539	-50.7504
16.2728	-54.8459	-96.6435	-55.0907	-86.01	-50.6615
16.3055	-55.0304	-96.4249	-55.016	-85.866	-50.5726
16.3381	-55.2149	-96.2063	-54.9414	-85.7219	-50.4837
16.3708	-55.3993	-95.9876	-54.867	-85.5776	-50.3947
16.4034	-55.5836	-95.7688	-54.7927	-85.4331	-50.3057
16.436	-55.7678	-95.5499	-54.7186	-85.2885	-50.2166
16.4687	-55.952	-95.3309	-54.6447	-85.1437	-50.1274
16.5013	-56.1361	-95.1119	-54.5709	-84.9988	-50.0382
16.5339	-56.32	-94.8927	-54.4974	-84.8537	-49.9489
16.5666	-56.5039	-94.6733	-54.424	-84.7084	-49.8595
16.5992	-56.6878	-94.4538	-54.3508	-84.563	-49.77
16.6319	-56.8715	-94.2342	-54.2778	-84.4175	-49.6804
16.6645	-57.0551	-94.0145	-54.2051	-84.2718	-49.5907
16.6971	-57.2386	-93.7946	-54.1325	-84.1259	-49.5008
16.7298	-57.4221	-93.5745	-54.0602	-83.98	-49.4108
16.7624	-57.6055	-93.3542	-53.9881	-83.8339	-49.3206
16.795	-57.7888	-93.1338	-53.9162	-83.6877	-49.2303
16.8277	-57.972	-92.9132	-53.8445	-83.5413	-49.1399
16.8603	-58.1552	-92.6924	-53.7731	-83.3949	-49.0492
16.893	-58.3384	-92.4713	-53.7018	-83.2483	-48.9584
16.9256	-58.5216	-92.2501	-53.6308	-83.1017	-48.8674
16.9582	-58.7047	-92.0287	-53.56	-82.955	-48.7762
16.9909	-58.8879	-91.807	-53.4895	-82.8082	-48.6849
17.0235	-59.0711	-91.585	-53.4191	-82.6613	-48.5933
17.0561	-59.2545	-91.3629	-53.3489	-82.5143	-48.5015
17.0888	-59.4379	-91.1404	-53.2789	-82.3673	-48.4094
17.1214	-59.6215	-90.9177	-53.209	-82.2203	-48.3172
17.154	-59.8053	-90.6946	-53.1392	-82.0732	-48.2247
17.1867	-59.9895	-90.4713	-53.0696	-81.926	-48.132
17.2193	-60.174	-90.2476	-53	-81.7788	-48.0391
17.252	-60.3589	-90.0236	-52.9304	-81.6315	-47.9459
17.2846	-60.5444	-89.7992	-52.8608	-81.4841	-47.8526
17.3172	-60.7306	-89.5743	-52.7911	-81.3366	-47.759
17.3499	-60.9176	-89.349	-52.7212	-81.189	-47.6653
17.3825	-61.1056	-89.1232	-52.6512	-81.0412	-47.5714
17.4151	-61.2949	-88.8969	-52.5808	-80.8931	-47.4775
17.4478	-61.4856	-88.6701	-52.51	-80.7446	-47.3836
17.4804	-61.678	-88.4428	-52.4388	-80.5958	-47.2898
17.5131	-61.8723	-88.215	-52.367	-80.4464	-47.1962
17.5457	-62.0688	-87.9869	-52.2947	-80.2964	-47.1031
17.5783	-62.2667	-87.7587	-52.2221	-80.1458	-47.0107
17.611	-62.4491	-87.5328	-52.159	-79.9956	-46.9221
17.6436	-62.6293	-87.3076	-52.0957	-79.8458	-46.8345
17.6762	-62.8069	-87.0835	-52.0322	-79.6966	-46.748
17.7089	-62.9817	-86.8604	-51.9683	-79.548	-46.6626
17.7415	-63.1535	-86.6386	-51.9041	-79.3999	-46.5785
17.7742	-63.3221	-86.4182	-51.8396	-79.2525	-46.4956
17.8068	-63.4872	-86.1992	-51.7747	-79.1056	-46.4141
17.8394	-63.6487	-85.9819	-51.7094	-78.9595	-46.334
17.8721	-63.8064	-85.7662	-51.6437	-78.814	-46.2552
17.9047	-63.96	-85.5524	-51.5775	-78.6692	-46.1779
17.9373	-64.1095	-85.3404	-51.5109	-78.5251	-46.102
17.97	-64.2547	-85.1303	-51.4438	-78.3817	-46.0276
18.0026	-64.3953	-84.9222	-51.3762	-78.239	-45.9547
18.0352	-64.5314	-84.7162	-51.308	-78.0971	-45.8832
18.0679	-64.6628	-84.5122	-51.2394	-77.9559	-45.8131
18.1005	-64.7895	-84.3102	-51.1701	-77.8154	-45.7445
18.1332	-64.9114	-84.1104	-51.1003	-77.6758	-45.6773
18.1658	-65.0284	-83.9126	-51.03	-77.5369	-45.6114
18.1984	-65.1405	-83.7169	-50.959	-77.3987	-45.5468
18.2311	-65.2477	-83.5233	-50.8875	-77.2613	-45.4834
18.2637	-65.3501	-83.3317	-50.8153	-77.1246	-45.4213
18.2963	-65.4476	-83.1421	-50.7426	-76.9887	-45.3602
18.329	-65.5404	-82.9544	-50.6692	-76.8534	-45.3002
18.3616	-65.6285	-82.7688	-50.5953	-76.7189	-45.2412
18.3943	-65.7121	-82.585	-50.5208	-76.585	-45.1829
18.4269	-65.7911	-82.4031	-50.4458	-76.4518	-45.1255
18.4595	-65.8658	-82.223	-50.3703	-76.3192	-45.0687
18.4922	-65.9363	-82.0447	-50.2943	-76.1872	-45.0125
18.5248	-66.0027	-81.8682	-50.2179	-76.0558	-44.9567
18.5574	-66.0651	-81.6934	-50.1411	-75.925	-44.9014
18.5901	-66.1238	-81.5204	-50.0639	-75.7947	-44.8464
18.6227	-66.179	-81.3491	-49.9865	-75.6649	-44.7916
18.6554	-66.2307	-81.1795	-49.9089	-75.5357	-44.737
18.688	-66.2792	-81.0118	-49.8312	-75.407	-44.6826
18.7206	-66.3246	-80.8458	-49.7534	-75.2789	-44.6282
18.7533	-66.3671	-80.6818	-49.6756	-75.1512	-44.5739
18.7859	-66.4069	-80.5197	-49.598	-75.0241	-44.5196
18.8185	-66.4442	-80.3595	-49.5205	-74.8975	-44.4653
18.8512	-66.4791	-80.2014	-49.4432	-74.7715	-44.411
18.8838	-66.5118	-80.0454	-49.3662	-74.646	-44.3566
18.9164	-66.5425	-79.8914	-49.2896	-74.5211	-44.3021
18.9491	-66.5714	-79.7396	-49.2134	-74.3968	-44.2475
18.9817	-66.5985	-79.5899	-49.1376	-74.2731	-44.1929
19.0144	-66.6242	-79.4424	-49.0622	-74.1501	-44.1381
19.047	-66.6484	-79.297	-48.9873	-74.0277	-44.0832
19.0796	-66.6715	-79.1538	-48.913	-73.9059	-44.0281
19.1123	-66.6934	-79.0127	-48.8391	-73.7849	-43.973
19.1449	-66.7144	-78.8738	-48.7658	-73.6646	-43.9178
19.1775	-66.7345	-78.737	-48.693	-73.545	-43.8624
19.2102	-66.7539	-78.6023	-48.6206	-73.4262	-43.8069
19.2428	-66.7725	-78.4696	-48.5487	-73.3081	-43.7513
19.2755	-66.7905	-78.3389	-48.4773	-73.1909	-43.6956
19.3081	-66.8079	-78.2101	-48.4062	-73.0744	-43.6398
19.3407	-66.8248	-78.0832	-48.3355	-72.9587	-43.5839
19.3734	-66.841	-77.9582	-48.2651	-72.8438	-43.5279
19.406	-66.8567	-77.8349	-48.195	-72.7297	-43.4718
19.4386	-66.8717	-77.7132	-48.125	-72.6164	-43.4157
19.4713	-66.8862	-77.5932	-48.0552	-72.5039	-43.3595
19.5039	-66.8999	-77.4747	-47.9854	-72.3921	-43.3032
19.5366	-66.9129	-77.3576	-47.9157	-72.2811	-43.2469
19.5692	-66.925	-77.2419	-47.8459	-72.1708	-43.1906
19.6018	-66.9363	-77.1275	-47.776	-72.0612	-43.1343
19.6345	-66.9465	-77.0143	-47.7059	-71.9522	-43.0781
19.6671	-66.9555	-76.9022	-47.6356	-71.8437	-43.022
19.6997	-66.9632	-76.7912	-47.565	-71.7358	-42.9659
19.7324	-66.9696	-76.6811	-47.4942	-71.6284	-42.91
19.765	-66.9743	-76.572	-47.4229	-71.5215	-42.8542
19.7977	-66.9774	-76.4637	-47.3513	-71.4149	-42.7985
19.8303	-66.9786	-76.3561	-47.2792	-71.3086	-42.7431
19.8629	-66.9778	-76.2493	-47.2067	-71.2026	-42.6878
19.8956	-66.9749	-76.1432	-47.1336	-71.0967	-42.6327
19.9282	-66.9698	-76.0377	-47.0601	-70.991	-42.5778
19.9608	-66.9623	-75.9327	-46.9861	-70.8853	-42.5232
19.9935	-66.9523	-75.8283	-46.9115	-70.7796	-42.4688
20.0261	-66.9398	-75.7244	-46.8365	-70.6738	-42.4147
20.0587	-66.9247	-75.6209	-46.7609	-70.5678	-42.3608
20.0914	-66.9069	-75.5179	-46.685	-70.4616	-42.3072
20.124	-66.8863	-75.4152	-46.6086	-70.3551	-42.2538
20.1567	-66.863	-75.3128	-46.5318	-70.2483	-42.2007
20.1893	-66.8368	-75.2108	-46.4548	-70.1411	-42.1479
20.2219	-66.8078	-75.109	-46.3774	-70.0336	-42.0953
20.2546	-66.7761	-75.0075	-46.2998	-69.9255	-42.043
20.2872	-66.7416	-74.9061	-46.2221	-69.817	-41.9909
20.3198	-66.7044	-74.805	-46.1443	-69.708	-41.939
20.3525	-66.6647	-74.704	-46.0665	-69.5985	-41.8873
20.3851	-66.6224	-74.6031	-45.9887	-69.4885	-41.8359
20.4178	-66.5778	-74.5024	-45.9111	-69.3781	-41.7846
20.4504	-66.5309	-74.4017	-45.8337	-69.2671	-41.7335
20.483	-66.482	-74.3012	-45.7566	-69.1558	-41.6826
20.5157	-66.4313	-74.2006	-45.68	-69.044	-41.6318
20.5483	-66.3788	-74.1002	-45.604	-68.9318	-41.5812
20.5809	-66.3248	-73.9997	-45.5285	-68.8192	-41.5307
20.6136	-66.2696	-73.8993	-45.4538	-68.7062	-41.4803
20.6462	-66.2133	-73.799	-45.3799	-68.5929	-41.4302
20.6789	-66.1562	-73.6986	-45.307	-68.4792	-41.3802
20.7115	-66.0985	-73.5983	-45.2352	-68.3652	-41.3305
20.7441	-66.0404	-73.498	-45.1645	-68.2509	-41.2809
20.7768	-65.9823	-73.3978	-45.0951	-68.1362	-41.2316
20.8094	-65.9243	-73.2975	-45.0271	-68.0212	-41.1826
20.842	-65.8667	-73.1974	-44.9607	-67.906	-41.1338
20.8747	-65.8099	-73.0973	-44.8958	-67.7904	-41.0854
20.9073	-65.754	-72.9973	-44.8327	-67.6745	-41.0373
20.9399	-65.6992	-72.8973	-44.7714	-67.5583	-40.9895
20.9726	-65.646	-72.7975	-44.712	-67.4418	-40.9422
21.0052	-65.5944	-72.6977	-44.6546	-67.325	-40.8954
21.0379	-65.5447	-72.598	-44.5993	-67.208	-40.849
21.0705	-65.4972	-72.4984	-44.5461	-67.0907	-40.8033
21.1031	-65.4521	-72.3989	-44.4952	-66.9731	-40.7581
21.1358	-65.4095	-72.2994	-44.4464	-66.8552	-40.7135
21.1684	-65.3696	-72.1999	-44.3999	-66.7371	-40.6697
21.201	-65.3327	-72.1004	-44.3557	-66.6187	-40.6265
21.2337	-65.2987	-72.0009	-44.3138	-66.5	-40.5842
21.2663	-65.268	-71.9012	-44.2741	-66.381	-40.5427
21.299	-65.2404	-71.8015	-44.2366	-66.2617	-40.5021
21.3316	-65.2162	-71.7015	-44.2013	-66.1422	-40.4624
21.3642	-65.1953	-71.6014	-44.168	-66.0225	-40.4236
21.3969	-65.1778	-71.5009	-44.1367	-65.9024	-40.3859
21.4295	-65.1636	-71.4001	-44.1073	-65.7822	-40.3492
21.4621	-65.1528	-71.2989	-44.0797	-65.6617	-40.3135
21.4948	-65.1452	-71.1973	-44.0538	-65.541	-40.279
21.5274	-65.1408	-71.0951	-44.0295	-65.4202	-40.2456
21.5601	-65.1395	-70.9923	-44.0066	-65.2993	-40.2133
21.5927	-65.1411	-70.8888	-43.985	-65.1782	-40.1822
21.6253	-65.1455	-70.7846	-43.9646	-65.0572	-40.1522
21.658	-65.1524	-70.6796	-43.9452	-64.9361	-40.1234
21.6906	-65.1618	-70.5737	-43.9266	-64.8151	-40.0958
21.7232	-65.1732	-70.4668	-43.9088	-64.6942	-40.0693
21.7559	-65.1866	-70.359	-43.8915	-64.5735	-40.044
21.7885	-65.2017	-70.2501	-43.8747	-64.453	-40.0197
21.8211	-65.2182	-70.1402	-43.858	-64.3329	-39.9965
21.8538	-65.2358	-70.0291	-43.8415	-64.2131	-39.9744
21.8864	-65.2543	-69.9168	-43.8249	-64.0938	-39.9534
21.9191	-65.2735	-69.8034	-43.8081	-63.975	-39.9333
21.9517	-65.2931	-69.6887	-43.7908	-63.8567	-39.9141
21.9843	-65.3129	-69.5728	-43.7731	-63.7391	-39.8959
22.017	-65.3326	-69.4557	-43.7548	-63.6222	-39.8786
22.0496	-65.3519	-69.3374	-43.7357	-63.506	-39.862
22.0822	-65.3707	-69.218	-43.7158	-63.3907	-39.8462
22.1149	-65.3888	-69.0973	-43.6949	-63.2761	-39.8312
22.1475	-65.4058	-68.9756	-43.6729	-63.1625	-39.8167
22.1802	-65.4217	-68.8527	-43.6497	-63.0498	-39.8029
22.2128	-65.4361	-68.7289	-43.6253	-62.9381	-39.7895
22.2454	-65.4491	-68.604	-43.5996	-62.8274	-39.7767
22.2781	-65.4603	-68.4783	-43.5725	-62.7179	-39.7642
22.3107	-65.4697	-68.3518	-43.5439	-62.6095	-39.752
22.3433	-65.4772	-68.2245	-43.5137	-62.5024	-39.7402
22.376	-65.4826	-68.0966	-43.4819	-62.3966	-39.7286
22.4086	-65.4859	-67.9681	-43.4485	-62.2922	-39.7171
22.4413	-65.487	-67.8391	-43.4134	-62.1893	-39.7058
22.4739	-65.4859	-67.7097	-43.3765	-62.0878	-39.6946
22.5065	-65.4825	-67.5801	-43.338	-61.988	-39.6834
22.5392	-65.4769	-67.4502	-43.2976	-61.8898	-39.6723
22.5718	-65.469	-67.3202	-43.2555	-61.7933	-39.6611
22.6044	-65.4589	-67.1902	-43.2117	-61.6986	-39.6498
22.6371	-65.4467	-67.0603	-43.1662	-61.6057	-39.6384
22.6697	-65.4323	-66.9307	-43.119	-61.5146	-39.627
22.7023	-65.4159	-66.8013	-43.0701	-61.4255	-39.6154
22.735	-65.3975	-66.6723	-43.0197	-61.3383	-39.6036
22.7676	-65.3773	-66.5439	-42.9678	-61.253	-39.5918
22.8003	-65.3554	-66.4161	-42.9145	-61.1697	-39.5797
22.8329	-65.332	-66.2891	-42.8598	-61.0883	-39.5675
22.8655	-65.3071	-66.163	-42.8039	-61.0089	-39.5552
22.8982	-65.2809	-66.0379	-42.7468	-60.9314	-39.5427
22.9308	-65.2535	-65.914	-42.6886	-60.8558	-39.53
22.9634	-65.2253	-65.7913	-42.6296	-60.7822	-39.5172
22.9961	-65.1961	-65.67	-42.5696	-60.7104	-39.5043
23.0287	-65.1663	-65.5503	-42.509	-60.6404	-39.4912
23.0614	-65.136	-65.4322	-42.4477	-60.5722	-39.4781
23.094	-65.1054	-65.3159	-42.3859	-60.5058	-39.4649
23.1266	-65.0745	-65.2014	-42.3237	-60.4411	-39.4516
23.1593	-65.0435	-65.0889	-42.2613	-60.378	-39.4384
23.1919	-65.0125	-64.9785	-42.1986	-60.3165	-39.4253
23.2245	-64.9818	-64.8702	-42.1358	-60.2565	-39.4123
23.2572	-64.9513	-64.7641	-42.073	-60.198	-39.3994
23.2898	-64.9213	-64.6602	-42.0103	-60.1409	-39.3868
23.3225	-64.8918	-64.5587	-41.9478	-60.0851	-39.3744
23.3551	-64.8629	-64.4595	-41.8855	-60.0306	-39.3624
23.3877	-64.8348	-64.3628	-41.8235	-59.9773	-39.3507
23.4204	-64.8075	-64.2685	-41.7618	-59.925	-39.3394
23.453	-64.7811	-64.1766	-41.7006	-59.8738	-39.3287
23.4856	-64.7556	-64.0873	-41.6397	-59.8236	-39.3184
23.5183	-64.7312	-64.0005	-41.5793	-59.7742	-39.3087
23.5509	-64.7078	-63.9161	-41.5193	-59.7256	-39.2995
23.5836	-64.6855	-63.8343	-41.4598	-59.6778	-39.2908
23.6162	-64.6643	-63.755	-41.4007	-59.6307	-39.2827
23.6488	-64.6442	-63.6781	-41.3421	-59.5841	-39.2751
23.6815	-64.6253	-63.6037	-41.2839	-59.5382	-39.2679
23.7141	-64.6073	-63.5317	-41.2261	-59.4927	-39.2611
23.7467	-64.5905	-63.462	-41.1686	-59.4478	-39.2546
23.7794	-64.5746	-63.3947	-41.1115	-59.4032	-39.2483
23.812	-64.5596	-63.3295	-41.0548	-59.3591	-39.2421
23.8446	-64.5455	-63.2665	-40.9982	-59.3153	-39.2359
23.8773	-64.5321	-63.2056	-40.9419	-59.2719	-39.2297
23.9099	-64.5195	-63.1466	-40.8856	-59.2288	-39.2232
23.9426	-64.5073	-63.0895	-40.8295	-59.186	-39.2164
23.9752	-64.4957	-63.0342	-40.7735	-59.1434	-39.2091
24.0078	-64.4843	-62.9807	-40.7174	-59.101	-39.2011
24.0405	-64.4732	-62.9287	-40.6613	-59.0588	-39.1925
24.0731	-64.4622	-62.8782	-40.6051	-59.0167	-39.1829
24.1057	-64.4511	-62.8291	-40.5488	-58.9747	-39.1723
24.1384	-64.4397	-62.7813	-40.4925	-58.9327	-39.1606
24.171	-64.4281	-62.7346	-40.4359	-58.8907	-39.1475
24.2037	-64.416	-62.689	-40.3792	-58.8487	-39.1331
24.2363	-64.4032	-62.6443	-40.3224	-58.8067	-39.117
24.2689	-64.3897	-62.6004	-40.2654	-58.7645	-39.0993
24.3016	-64.3753	-62.5572	-40.2082	-58.7221	-39.0799
24.3342	-64.36	-62.5146	-40.1509	-58.6796	-39.0585
24.3668	-64.3436	-62.4724	-40.0935	-58.6368	-39.0353
24.3995	-64.326	-62.4305	-40.036	-58.5938	-39.0099
24.4321	-64.3071	-62.3889	-39.9784	-58.5504	-38.9825
24.4648	-64.2869	-62.3474	-39.9207	-58.5067	-38.9529
24.4974	-64.2652	-62.3059	-39.8631	-58.4625	-38.9211
24.53	-64.2421	-62.2644	-39.8056	-58.418	-38.887
24.5627	-64.2175	-62.2227	-39.7481	-58.3729	-38.8506
24.5953	-64.1913	-62.1808	-39.6909	-58.3274	-38.812
24.6279	-64.1635	-62.1386	-39.634	-58.2812	-38.7711
24.6606	-64.1341	-62.0961	-39.5774	-58.2345	-38.7279
24.6932	-64.103	-62.0531	-39.5213	-58.1872	-38.6824
24.7258	-64.0702	-62.0097	-39.4658	-58.1393	-38.6348
24.7585	-64.0358	-61.9657	-39.4109	-58.0907	-38.5851
24.7911	-63.9997	-61.9212	-39.3569	-58.0414	-38.5333
24.8238	-63.962	-61.8762	-39.3039	-57.9913	-38.4795
24.8564	-63.9227	-61.8305	-39.2519	-57.9406	-38.4239
24.889	-63.8817	-61.7842	-39.201	-57.8892	-38.3666
24.9217	-63.8392	-61.7373	-39.1516	-57.837	-38.3077
24.9543	-63.7951	-61.6898	-39.1035	-57.7841	-38.2472
24.9869	-63.7495	-61.6417	-39.0571	-57.7304	-38.1855
25.0196	-63.7025	-61.593	-39.0123	-57.676	-38.1226
25.0522	-63.6539	-61.5437	-38.9694	-57.6208	-38.0586
25.0849	-63.604	-61.4938	-38.9283	-57.565	-37.9938
25.1175	-63.5527	-61.4435	-38.8893	-57.5084	-37.9284
25.1501	-63.5	-61.3926	-38.8525	-57.4511	-37.8625
25.1828	-63.446	-61.3413	-38.8178	-57.3932	-37.7963
25.2154	-63.3908	-61.2896	-38.7854	-57.3346	-37.7301
25.248	-63.3344	-61.2375	-38.7554	-57.2753	-37.664
25.2807	-63.2769	-61.185	-38.7279	-57.2155	-37.5983
25.3133	-63.2183	-61.1323	-38.7028	-57.155	-37.5331
25.346	-63.1587	-61.0792	-38.6803	-57.0941	-37.4688
25.3786	-63.0982	-61.026	-38.6604	-57.0325	-37.4055
25.4112	-63.0369	-60.9726	-38.6431	-56.9705	-37.3434
25.4439	-62.9748	-60.919	-38.6284	-56.9079	-37.2828
25.4765	-62.9119	-60.8653	-38.6164	-56.8449	-37.2239
25.5091	-62.8485	-60.8116	-38.6069	-56.7813	-37.1668
25.5418	-62.7845	-60.7579	-38.6	-56.7173	-37.1119
25.5744	-62.72	-60.7042	-38.5956	-56.6528	-37.0592
25.607	-62.6551	-60.6506	-38.5937	-56.5877	-37.009
25.6397	-62.5899	-60.5971	-38.5941	-56.5222	-36.9614
25.6723	-62.5244	-60.5438	-38.5969	-56.4562	-36.9166
25.705	-62.4588	-60.4906	-38.6018	-56.3898	-36.8746
25.7376	-62.3931	-60.4378	-38.6088	-56.3229	-36.8355
25.7702	-62.3273	-60.3852	-38.6177	-56.2555	-36.7995
25.8029	-62.2616	-60.333	-38.6283	-56.1877	-36.7666
25.8355	-62.196	-60.2811	-38.6406	-56.1194	-36.7368
25.8681	-62.1305	-60.2296	-38.6543	-56.0508	-36.7101
25.9008	-62.0652	-60.1785	-38.6692	-55.9817	-36.6866
25.9334	-62.0002	-60.1279	-38.6852	-55.9124	-36.6661
25.9661	-61.9356	-60.0776	-38.7021	-55.8426	-36.6486
25.9987	-61.8712	-60.0279	-38.7197	-55.7726	-36.6341
26.0313	-61.8073	-59.9786	-38.7378	-55.7022	-36.6223
26.064	-61.7438	-59.9297	-38.7561	-55.6316	-36.6134
26.0966	-61.6809	-59.8813	-38.7746	-55.5607	-36.6069
26.1292	-61.6184	-59.8334	-38.793	-55.4897	-36.603
26.1619	-61.5565	-59.7859	-38.811	-55.4184	-36.6012
26.1945	-61.4953	-59.7387	-38.8287	-55.3469	-36.6016
26.2272	-61.4347	-59.692	-38.8457	-55.2753	-36.6039
26.2598	-61.3748	-59.6455	-38.8619	-55.2037	-36.6079
26.2924	-61.3157	-59.5994	-38.8772	-55.1319	-36.6135
26.3251	-61.2574	-59.5534	-38.8914	-55.0601	-36.6204
26.3577	-61.2	-59.5076	-38.9044	-54.9883	-36.6285
26.3903	-61.1436	-59.4619	-38.916	-54.9165	-36.6375
26.423	-61.0882	-59.4163	-38.9261	-54.8447	-36.6473
26.4556	-61.0339	-59.3707	-38.9346	-54.7729	-36.6578
26.4883	-60.9809	-59.3249	-38.9414	-54.7011	-36.6687
26.5209	-60.929	-59.2791	-38.9464	-54.6293	-36.6798
26.5535	-60.8785	-59.233	-38.9495	-54.5576	-36.691
26.5862	-60.8294	-59.1867	-38.9506	-54.4858	-36.7022
26.6188	-60.7817	-59.1402	-38.9497	-54.4141	-36.7132
26.6514	-60.7354	-59.0933	-38.9467	-54.3423	-36.7239
26.6841	-60.6908	-59.046	-38.9415	-54.2705	-36.7342
26.7167	-60.6476	-58.9982	-38.9342	-54.1988	-36.744
26.7493	-60.6061	-58.9501	-38.9246	-54.127	-36.7532
26.782	-60.5662	-58.9014	-38.9129	-54.0551	-36.7617
26.8146	-60.5279	-58.8521	-38.8989	-53.9833	-36.7695
26.8473	-60.4912	-58.8023	-38.8827	-53.9115	-36.7765
26.8799	-60.4561	-58.7519	-38.8644	-53.8397	-36.7828
26.9125	-60.4225	-58.701	-38.8439	-53.768	-36.7882
26.9452	-60.3904	-58.6494	-38.8213	-53.6963	-36.7929
26.9778	-60.3596	-58.5972	-38.7966	-53.6249	-36.7967
27.0104	-60.3302	-58.5445	-38.7699	-53.5536	-36.7999
27.0431	-60.302	-58.4911	-38.7412	-53.4826	-36.8023
27.0757	-60.2749	-58.4371	-38.7106	-53.412	-36.804
27.1084	-60.2488	-58.3826	-38.678	-53.3417	-36.8051
27.141	-60.2237	-58.3275	-38.6436	-53.272	-36.8056
27.1736	-60.1994	-58.2719	-38.6074	-53.2029	-36.8057
27.2063	-60.1757	-58.2157	-38.5695	-53.1345	-36.8053
27.2389	-60.1527	-58.159	-38.53	-53.0668	-36.8046
27.2715	-60.1301	-58.1018	-38.4888	-53	-36.8037
27.3042	-60.1078	-58.0442	-38.4461	-52.9341	-36.8027
27.3368	-60.0857	-57.986	-38.402	-52.8692	-36.8016
27.3695	-60.0636	-57.9275	-38.3565	-52.8054	-36.8006
27.4021	-60.0415	-57.8685	-38.3097	-52.7428	-36.7997
27.4347	-60.0191	-57.809	-38.2617	-52.6814	-36.7992
27.4674	-59.9964	-57.7492	-38.2125	-52.6212	-36.7991
27.5	-59.9731	-57.689	-38.1623	-52.5623	-36.7995
27.5326	-59.9491	-57.6284	-38.111	-52.5048	-36.8005
27.5653	-59.9244	-57.5675	-38.0589	-52.4487	-36.8022
27.5979	-59.8986	-57.5063	-38.0058	-52.394	-36.8048
27.6305	-59.8717	-57.4448	-37.952	-52.3407	-36.8083
27.6632	-59.8436	-57.383	-37.8974	-52.2888	-36.8129
27.6958	-59.814	-57.3211	-37.8421	-52.2384	-36.8186
27.7285	-59.7828	-57.259	-37.7861	-52.1894	-36.8255
27.7611	-59.7499	-57.1969	-37.7295	-52.1419	-36.8337
27.7937	-59.7152	-57.1347	-37.6723	-52.0958	-36.8433
27.8264	-59.6785	-57.0725	-37.6144	-52.0512	-36.8544
27.859	-59.6398	-57.0104	-37.556	-52.0079	-36.8668
27.8916	-59.5989	-56.9484	-37.497	-51.9661	-36.8808
27.9243	-59.5558	-56.8867	-37.4375	-51.9257	-36.8964
27.9569	-59.5104	-56.8252	-37.3774	-51.8867	-36.9134
27.9896	-59.4628	-56.7641	-37.3167	-51.8489	-36.9319
28.0222	-59.4127	-56.7034	-37.2556	-51.8125	-36.9519
28.0548	-59.3604	-56.6431	-37.1939	-51.7773	-36.9733
28.0875	-59.3056	-56.5834	-37.1317	-51.7433	-36.996
28.1201	-59.2486	-56.5242	-37.069	-51.7105	-37.02
28.1527	-59.1893	-56.4657	-37.0058	-51.6788	-37.0451
28.1854	-59.1278	-56.4078	-36.9421	-51.648	-37.0712
28.218	-59.0641	-56.3507	-36.878	-51.6183	-37.0981
28.2507	-58.9984	-56.2944	-36.8135	-51.5894	-37.1258
28.2833	-58.9308	-56.2388	-36.7486	-51.5614	-37.154
28.3159	-58.8614	-56.1841	-36.6833	-51.5341	-37.1826
28.3486	-58.7903	-56.1302	-36.6176	-51.5075	-37.2114
28.3812	-58.7177	-56.0772	-36.5517	-51.4815	-37.2402
28.4138	-58.6438	-56.025	-36.4855	-51.4559	-37.2688
28.4465	-58.5687	-55.9736	-36.4191	-51.4307	-37.297
28.4791	-58.4925	-55.923	-36.3525	-51.4058	-37.3247
28.5117	-58.4156	-55.8732	-36.2858	-51.3811	-37.3517
28.5444	-58.338	-55.8242	-36.2191	-51.3565	-37.3777
28.577	-58.26	-55.7759	-36.1523	-51.3318	-37.4026
28.6097	-58.1817	-55.7283	-36.0857	-51.307	-37.4263
28.6423	-58.1034	-55.6814	-36.0191	-51.282	-37.4485
28.6749	-58.0253	-55.6351	-35.9528	-51.2567	-37.4691
28.7076	-57.9475	-55.5893	-35.8867	-51.2309	-37.488
28.7402	-57.8703	-55.5442	-35.821	-51.2046	-37.505
28.7728	-57.7938	-55.4995	-35.7557	-51.1778	-37.5201
28.8055	-57.7183	-55.4553	-35.6909	-51.1502	-37.533
28.8381	-57.6439	-55.4115	-35.6267	-51.1218	-37.5438
28.8708	-57.5708	-55.3681	-35.5631	-51.0926	-37.5522
28.9034	-57.4991	-55.325	-35.5002	-51.0624	-37.5583
28.936	-57.4291	-55.2823	-35.4382	-51.0314	-37.5619
28.9687	-57.3607	-55.2399	-35.3771	-50.9993	-37.5631
29.0013	-57.2942	-55.1977	-35.3169	-50.9662	-37.5617
29.0339	-57.2297	-55.1558	-35.2578	-50.9321	-37.5577
29.0666	-57.1672	-55.1141	-35.1998	-50.897	-37.5511
29.0992	-57.1069	-55.0725	-35.143	-50.8608	-37.542
29.1319	-57.0488	-55.0312	-35.0875	-50.8237	-37.5302
29.1645	-56.993	-54.99	-35.0333	-50.7856	-37.5159
29.1971	-56.9395	-54.9489	-34.9805	-50.7465	-37.499
29.2298	-56.8885	-54.908	-34.9292	-50.7065	-37.4795
29.2624	-56.8398	-54.8672	-34.8795	-50.6656	-37.4575
29.295	-56.7936	-54.8264	-34.8315	-50.6238	-37.4331
29.3277	-56.7498	-54.7858	-34.7852	-50.5813	-37.4063
29.3603	-56.7084	-54.7452	-34.7407	-50.538	-37.3771
29.393	-56.6694	-54.7047	-34.6982	-50.494	-37.3457
29.4256	-56.6327	-54.6642	-34.6576	-50.4493	-37.3121
29.4582	-56.5983	-54.6237	-34.6192	-50.4041	-37.2765
29.4909	-56.5661	-54.5832	-34.5829	-50.3583	-37.2388
29.5235	-56.5361	-54.5426	-34.5489	-50.3121	-37.1992
29.5561	-56.5081	-54.5019	-34.5173	-50.2655	-37.1579
29.5888	-56.4822	-54.4611	-34.4881	-50.2185	-37.115
29.6214	-56.4581	-54.4202	-34.4614	-50.1713	-37.0705
29.654	-56.4358	-54.3791	-34.4372	-50.1239	-37.0245
29.6867	-56.4153	-54.3378	-34.4157	-50.0764	-36.9774
29.7193	-56.3963	-54.2963	-34.3969	-50.0288	-36.929
29.752	-56.3789	-54.2546	-34.3808	-49.9812	-36.8797
29.7846	-56.3629	-54.2126	-34.3675	-49.9336	-36.8296
29.8172	-56.3483	-54.1704	-34.357	-49.8862	-36.7788
29.8499	-56.3349	-54.1279	-34.3492	-49.8389	-36.7275
29.8825	-56.3228	-54.0852	-34.3442	-49.7917	-36.6758
29.9151	-56.3117	-54.0423	-34.3421	-49.7447	-36.6239
29.9478	-56.3018	-53.9992	-34.3426	-49.698	-36.5719
29.9804	-56.2929	-53.9558	-34.3459	-49.6515	-36.5201
30.0131	-56.285	-53.9122	-34.3519	-49.6052	-36.4686
30.0457	-56.278	-53.8685	-34.3605	-49.5592	-36.4174
30.0783	-56.272	-53.8246	-34.3716	-49.5134	-36.3668
30.111	-56.2668	-53.7807	-34.3852	-49.4678	-36.3169
30.1436	-56.2626	-53.7366	-34.4012	-49.4225	-36.2678
30.1762	-56.2593	-53.6925	-34.4195	-49.3773	-36.2196
30.2089	-56.2569	-53.6485	-34.44	-49.3323	-36.1725
30.2415	-56.2554	-53.6044	-34.4626	-49.2875	-36.1264
30.2742	-56.2549	-53.5604	-34.4871	-49.2427	-36.0815
30.3068	-56.2554	-53.5166	-34.5134	-49.198	-36.0378
30.3394	-56.2569	-53.4729	-34.5413	-49.1534	-35.9953
30.3721	-56.2595	-53.4294	-34.5708	-49.1087	-35.9542
30.4047	-56.2632	-53.3861	-34.6016	-49.064	-35.9144
30.4373	-56.2681	-53.343	-34.6336	-49.0192	-35.876
30.47	-56.2744	-53.3003	-34.6666	-48.9742	-35.8388
30.5026	-56.2819	-53.2578	-34.7005	-48.9291	-35.8029
30.5352	-56.2909	-53.2156	-34.7351	-48.8837	-35.7684
30.5679	-56.3014	-53.1738	-34.7702	-48.838	-35.735
30.6005	-56.3135	-53.1323	-34.8057	-48.7921	-35.7029
30.6332	-56.3273	-53.0912	-34.8414	-48.7457	-35.672
30.6658	-56.3428	-53.0504	-34.8771	-48.699	-35.6422
30.6984	-56.3603	-53.01	-34.9127	-48.6519	-35.6135
30.7311	-56.3797	-52.9699	-34.948	-48.6043	-35.5858
30.7637	-56.4011	-52.9302	-34.9829	-48.5561	-35.5591
30.7963	-56.4247	-52.8908	-35.0171	-48.5075	-35.5333
30.829	-56.4506	-52.8518	-35.0506	-48.4582	-35.5084
30.8616	-56.4788	-52.8131	-35.0833	-48.4084	-35.4844
30.8943	-56.5095	-52.7747	-35.1148	-48.358	-35.4612
30.9269	-56.5427	-52.7366	-35.1452	-48.3069	-35.4387
30.9595	-56.5785	-52.6988	-35.1742	-48.2551	-35.4169
30.9922	-56.617	-52.6613	-35.2018	-48.2028	-35.3959
31.0248	-56.6583	-52.624	-35.2279	-48.1498	-35.3756
31.0574	-56.7024	-52.587	-35.2522	-48.0961	-35.3559
31.0901	-56.7493	-52.5503	-35.2747	-48.0419	-35.3368
31.1227	-56.7991	-52.5139	-35.2953	-47.9872	-35.3184
31.1554	-56.8519	-52.4777	-35.3138	-47.9319	-35.3006
31.188	-56.9075	-52.4418	-35.3303	-47.8761	-35.2834
31.2206	-56.966	-52.4062	-35.3446	-47.8199	-35.2667
31.2533	-57.0275	-52.3709	-35.3567	-47.7634	-35.2506
31.2859	-57.0917	-52.3359	-35.3665	-47.7065	-35.2351
31.3185	-57.1587	-52.3013	-35.374	-47.6494	-35.2201
31.3512	-57.2284	-52.2671	-35.3792	-47.5922	-35.2057
31.3838	-57.3007	-52.2332	-35.382	-47.5348	-35.1918
31.4164	-57.3753	-52.1998	-35.3824	-47.4774	-35.1784
31.4491	-57.4523	-52.1668	-35.3804	-47.4201	-35.1656
31.4817	-57.5314	-52.1342	-35.3761	-47.3629	-35.1533
31.5144	-57.6125	-52.102	-35.3695	-47.3059	-35.1416
31.547	-57.6954	-52.0702	-35.3606	-47.2492	-35.1304
31.5796	-57.7798	-52.0388	-35.3494	-47.1929	-35.1197
31.6123	-57.8656	-52.0079	-35.3361	-47.1372	-35.1096
31.6449	-57.9526	-51.9773	-35.3207	-47.0819	-35.1001
31.6775	-58.0406	-51.947	-35.3033	-47.0273	-35.0911
31.7102	-58.1293	-51.9171	-35.2839	-46.9733	-35.0828
31.7428	-58.2185	-51.8875	-35.2627	-46.9201	-35.075
31.7755	-58.308	-51.8581	-35.2397	-46.8677	-35.0679
31.8081	-58.3976	-51.8291	-35.2152	-46.816	-35.0614
31.8407	-58.487	-51.8002	-35.1891	-46.7653	-35.0555
31.8734	-58.576	-51.7716	-35.1615	-46.7154	-35.0504
31.906	-58.6643	-51.7431	-35.1327	-46.6664	-35.0461
31.9386	-58.7519	-51.7148	-35.1026	-46.6182	-35.0425
31.9713	-58.8384	-51.6865	-35.0715	-46.571	-35.0397
32.0039	-58.9236	-51.6583	-35.0393	-46.5246	-35.0378
32.0366	-59.0074	-51.6301	-35.0063	-46.4791	-35.0368
32.0692	-59.0895	-51.6019	-34.9724	-46.4344	-35.0367
32.1018	-59.1697	-51.5736	-34.9379	-46.3905	-35.0377
32.1345	-59.2478	-51.5452	-34.9027	-46.3474	-35.0396
32.1671	-59.3235	-51.5167	-34.867	-46.305	-35.0427
32.1997	-59.3968	-51.4879	-34.8309	-46.2633	-35.0468
32.2324	-59.4674	-51.459	-34.7944	-46.2224	-35.0522
32.265	-59.535	-51.4297	-34.7575	-46.1821	-35.0587
32.2977	-59.5995	-51.4001	-34.7204	-46.1424	-35.0664
32.3303	-59.6607	-51.3702	-34.6831	-46.1034	-35.0753
32.3629	-59.7185	-51.34	-34.6456	-46.0649	-35.0855
32.3956	-59.7727	-51.3093	-34.608	-46.0269	-35.0968
32.4282	-59.8231	-51.2781	-34.5702	-45.9895	-35.1094
32.4608	-59.8696	-51.2465	-34.5324	-45.9526	-35.1231
32.4935	-59.912	-51.2144	-34.4944	-45.9162	-35.1381
32.5261	-59.9503	-51.1817	-34.4563	-45.8803	-35.1541
32.5587	-59.9844	-51.1484	-34.4181	-45.8448	-35.1712
32.5914	-60.0142	-51.1144	-34.3799	-45.8098	-35.1894
32.624	-60.0397	-51.0799	-34.3415	-45.7753	-35.2086
32.6567	-60.0607	-51.0446	-34.303	-45.7413	-35.2288
32.6893	-60.0774	-51.0085	-34.2644	-45.7077	-35.2499
32.7219	-60.0897	-50.9717	-34.2257	-45.6745	-35.2718
32.7546	-60.0976	-50.934	-34.1868	-45.6417	-35.2945
32.7872	-60.1013	-50.8955	-34.1478	-45.6093	-35.3179
32.8198	-60.1006	-50.8561	-34.1087	-45.5773	-35.3419
32.8525	-60.0959	-50.8157	-34.0693	-45.5457	-35.3664
32.8851	-60.087	-50.7745	-34.0299	-45.5143	-35.3915
32.9178	-60.0742	-50.7323	-33.9902	-45.4833	-35.4169
32.9504	-60.0575	-50.6891	-33.9503	-45.4525	-35.4426
32.983	-60.0371	-50.6451	-33.9103	-45.4219	-35.4685
33.0157	-60.0131	-50.6	-33.87	-45.3916	-35.4946
33.0483	-59.9856	-50.5541	-33.8296	-45.3614	-35.5208
33.0809	-59.9547	-50.5074	-33.7889	-45.3314	-35.5469
33.1136	-59.9207	-50.4598	-33.7481	-45.3016	-35.573
33.1462	-59.8836	-50.4114	-33.707	-45.2718	-35.599
33.1789	-59.8436	-50.3623	-33.6658	-45.2422	-35.6247
33.2115	-59.8009	-50.3126	-33.6244	-45.2128	-35.6501
33.2441	-59.7555	-50.2623	-33.5829	-45.1834	-35.6752
33.2768	-59.7076	-50.2116	-33.5414	-45.1542	-35.6999
33.3094	-59.6573	-50.1605	-33.4997	-45.1252	-35.724
33.342	-59.6048	-50.1091	-33.458	-45.0963	-35.7476
33.3747	-59.5502	-50.0577	-33.4163	-45.0676	-35.7707
33.4073	-59.4936	-50.0062	-33.3747	-45.0391	-35.793
33.4399	-59.4352	-49.9547	-33.3332	-45.0108	-35.8146
33.4726	-59.3751	-49.9036	-33.2918	-44.9828	-35.8354
33.5052	-59.3133	-49.8527	-33.2506	-44.9551	-35.8554
33.5379	-59.2501	-49.8023	-33.2097	-44.9277	-35.8744
33.5705	-59.1856	-49.7525	-33.1691	-44.9007	-35.8926
33.6031	-59.1198	-49.7034	-33.1289	-44.874	-35.9097
33.6358	-59.0529	-49.655	-33.0892	-44.8478	-35.9259
33.6684	-58.9851	-49.6076	-33.0499	-44.8219	-35.9409
33.701	-58.9164	-49.5612	-33.0113	-44.7965	-35.9549
33.7337	-58.847	-49.516	-32.9733	-44.7715	-35.9677
33.7663	-58.777	-49.472	-32.9361	-44.747	-35.9793
33.799	-58.7066	-49.4294	-32.8998	-44.7229	-35.9897
33.8316	-58.6358	-49.3883	-32.8643	-44.6992	-35.999
33.8642	-58.5649	-49.3487	-32.8299	-44.6761	-36.007
33.8969	-58.4938	-49.3108	-32.7965	-44.6533	-36.0138
33.9295	-58.4228	-49.2747	-32.7644	-44.6311	-36.0193
33.9621	-58.352	-49.2404	-32.7335	-44.6092	-36.0236
33.9948	-58.2814	-49.208	-32.7041	-44.5878	-36.0267
34.0274	-58.2112	-49.1776	-32.676	-44.5668	-36.0285
34.0601	-58.1414	-49.1492	-32.6496	-44.5462	-36.0291
34.0927	-58.0722	-49.1229	-32.6247	-44.526	-36.0284
34.1253	-58.0037	-49.0987	-32.6015	-44.5061	-36.0266
34.158	-57.9358	-49.0767	-32.5802	-44.4866	-36.0236
34.1906	-57.8687	-49.0569	-32.5606	-44.4675	-36.0194
34.2232	-57.8025	-49.0393	-32.5429	-44.4486	-36.0142
34.2559	-57.737	-49.024	-32.5271	-44.4301	-36.0078
34.2885	-57.6725	-49.0109	-32.5133	-44.4118	-36.0005
34.3211	-57.6089	-49	-32.5014	-44.3938	-35.9923
34.3538	-57.5462	-48.9914	-32.4914	-44.3761	-35.9831
34.3864	-57.4844	-48.985	-32.4834	-44.3587	-35.9731
34.4191	-57.4236	-48.9808	-32.4773	-44.3415	-35.9623
34.4517	-57.3638	-48.9788	-32.473	-44.3247	-35.9508
34.4843	-57.3049	-48.9789	-32.4706	-44.3081	-35.9387
34.517	-57.247	-48.981	-32.4698	-44.2919	-35.926
34.5496	-57.1901	-48.9852	-32.4708	-44.276	-35.9128
34.5822	-57.134	-48.9913	-32.4733	-44.2604	-35.8991
34.6149	-57.079	-48.9993	-32.4772	-44.2452	-35.8851
34.6475	-57.0249	-49.0092	-32.4825	-44.2304	-35.8708
34.6802	-56.9717	-49.0207	-32.4891	-44.2159	-35.8563
34.7128	-56.9195	-49.0338	-32.4968	-44.2019	-35.8416
34.7454	-56.8682	-49.0485	-32.5056	-44.1882	-35.8269
34.7781	-56.8179	-49.0646	-32.5152	-44.175	-35.8122
34.8107	-56.7687	-49.082	-32.5256	-44.1621	-35.7975
34.8433	-56.7204	-49.1007	-32.5367	-44.1497	-35.7829
34.876	-56.6732	-49.1204	-32.5483	-44.1377	-35.7685
34.9086	-56.6271	-49.1411	-32.5603	-44.1262	-35.7543
34.9413	-56.5821	-49.1627	-32.5727	-44.1151	-35.7404
34.9739	-56.5382	-49.185	-32.5853	-44.1045	-35.7268
35.0065	-56.4953	-49.208	-32.5981	-44.0943	-35.7135
35.0392	-56.4536	-49.2316	-32.6109	-44.0846	-35.7006
35.0718	-56.413	-49.2557	-32.6236	-44.0753	-35.6882
35.1044	-56.3735	-49.2801	-32.6362	-44.0666	-35.6763
35.1371	-56.3351	-49.3048	-32.6487	-44.0583	-35.6649
35.1697	-56.2978	-49.3296	-32.6608	-44.0504	-35.6541
35.2023	-56.2616	-49.3546	-32.6726	-44.0429	-35.6439
35.235	-56.2265	-49.3797	-32.684	-44.0359	-35.6344
35.2676	-56.1925	-49.4047	-32.695	-44.0292	-35.6257
35.3003	-56.1596	-49.4295	-32.7055	-44.023	-35.6177
35.3329	-56.1278	-49.4542	-32.7155	-44.0171	-35.6106
35.3655	-56.097	-49.4787	-32.725	-44.0115	-35.6044
35.3982	-56.0673	-49.5029	-32.7339	-44.0063	-35.5991
35.4308	-56.0387	-49.5267	-32.7423	-44.0014	-35.5948
35.4634	-56.0111	-49.5501	-32.7501	-43.9968	-35.5916
35.4961	-55.9846	-49.5731	-32.7573	-43.9924	-35.5895
35.5287	-55.9591	-49.5956	-32.7639	-43.9883	-35.5886
35.5614	-55.9347	-49.6177	-32.77	-43.9845	-35.5889
35.594	-55.9113	-49.6393	-32.7755	-43.9808	-35.5904
35.6266	-55.8891	-49.6603	-32.7804	-43.9774	-35.5933
35.6593	-55.8679	-49.6809	-32.7848	-43.9742	-35.5975
35.6919	-55.8479	-49.701	-32.7887	-43.9711	-35.6032
35.7245	-55.8291	-49.7207	-32.7921	-43.9682	-35.6103
35.7572	-55.8114	-49.7399	-32.795	-43.9654	-35.6188
35.7898	-55.795	-49.7587	-32.7974	-43.9627	-35.6289
35.8225	-55.7799	-49.7771	-32.7995	-43.9601	-35.6406
35.8551	-55.7661	-49.7952	-32.8011	-43.9575	-35.6538
35.8877	-55.7536	-49.813	-32.8025	-43.9548	-35.6685
35.9204	-55.7426	-49.8305	-32.8035	-43.9521	-35.6849
35.953	-55.733	-49.8477	-32.8042	-43.9493	-35.7028
35.9856	-55.7249	-49.8648	-32.8047	-43.9462	-35.7223
36.0183	-55.7183	-49.8817	-32.8051	-43.9429	-35.7433
36.0509	-55.7132	-49.8984	-32.8053	-43.9393	-35.7658
36.0836	-55.7097	-49.9151	-32.8054	-43.9352	-35.7899
36.1162	-55.7078	-49.9316	-32.8054	-43.9307	-35.8154
36.1488	-55.7075	-49.9481	-32.8054	-43.9256	-35.8423
36.1815	-55.7088	-49.9644	-32.8054	-43.9198	-35.8706
36.2141	-55.7118	-49.9808	-32.8054	-43.9133	-35.9003
36.2467	-55.7164	-49.997	-32.8055	-43.9059	-35.9313
36.2794	-55.7228	-50.0132	-32.8056	-43.8977	-35.9635
36.312	-55.7308	-50.0292	-32.8057	-43.8885	-35.9969
36.3446	-55.7405	-50.0451	-32.8059	-43.8783	-36.0314
36.3773	-55.7519	-50.0609	-32.8063	-43.867	-36.067
36.4099	-55.7651	-50.0764	-32.8067	-43.8547	-36.1037
36.4426	-55.7799	-50.0918	-32.8071	-43.8412	-36.1412
36.4752	-55.7966	-50.1068	-32.8077	-43.8265	-36.1797
36.5078	-55.8149	-50.1215	-32.8083	-43.8107	-36.2189
36.5405	-55.835	-50.1358	-32.8089	-43.7937	-36.2588
36.5731	-55.8568	-50.1496	-32.8094	-43.7755	-36.2993
36.6057	-55.8804	-50.1629	-32.81	-43.7562	-36.3403
36.6384	-55.9057	-50.1756	-32.8104	-43.7356	-36.3818
36.671	-55.9326	-50.1876	-32.8108	-43.714	-36.4237
36.7037	-55.9613	-50.1987	-32.811	-43.6913	-36.4658
36.7363	-55.9916	-50.209	-32.811	-43.6675	-36.508
36.7689	-56.0235	-50.2183	-32.8107	-43.6427	-36.5504
36.8016	-56.0571	-50.2264	-32.8103	-43.6169	-36.5927
36.8342	-56.0923	-50.2333	-32.8095	-43.5903	-36.6349
36.8668	-56.129	-50.2389	-32.8085	-43.5629	-36.6769
36.8995	-56.1672	-50.243	-32.8071	-43.5347	-36.7185
36.9321	-56.2068	-50.2455	-32.8054	-43.5059	-36.7597
36.9648	-56.2479	-50.2463	-32.8035	-43.4765	-36.8003
36.9974	-56.2903	-50.2453	-32.8012	-43.4467	-36.8403
37.03	-56.3339	-50.2424	-32.7986	-43.4165	-36.8795
37.0627	-56.3787	-50.2375	-32.7958	-43.3861	-36.9179
37.0953	-56.4246	-50.2306	-32.7928	-43.3554	-36.9553
37.1279	-56.4715	-50.2214	-32.7896	-43.3247	-36.9917
37.1606	-56.5193	-50.2101	-32.7862	-43.2939	-37.027
37.1932	-56.568	-50.1964	-32.7828	-43.2632	-37.0611
37.2258	-56.6174	-50.1804	-32.7793	-43.2326	-37.094
37.2585	-56.6675	-50.162	-32.7759	-43.2023	-37.1255
37.2911	-56.7183	-50.1412	-32.7725	-43.1722	-37.1558
37.3238	-56.7695	-50.118	-32.7693	-43.1424	-37.1846
37.3564	-56.8211	-50.0923	-32.7664	-43.1131	-37.212
37.389	-56.8731	-50.0641	-32.7638	-43.0843	-37.238
37.4217	-56.9253	-50.0335	-32.7615	-43.0559	-37.2625
37.4543	-56.9777	-50.0005	-32.7597	-43.0282	-37.2857
37.4869	-57.0302	-49.9651	-32.7584	-43.0011	-37.3074
37.5196	-57.0826	-49.9273	-32.7577	-42.9748	-37.3276
37.5522	-57.1349	-49.8874	-32.7577	-42.9491	-37.3466
37.5849	-57.187	-49.8452	-32.7585	-42.9243	-37.3641
37.6175	-57.2388	-49.801	-32.7601	-42.9004	-37.3804
37.6501	-57.2902	-49.7548	-32.7625	-42.8773	-37.3955
37.6828	-57.3412	-49.7068	-32.7659	-42.8552	-37.4093
37.7154	-57.3916	-49.6571	-32.7703	-42.8341	-37.422
37.748	-57.4414	-49.6059	-32.7758	-42.8141	-37.4336
37.7807	-57.4904	-49.5532	-32.7824	-42.7951	-37.4443
37.8133	-57.5387	-49.4994	-32.7902	-42.7773	-37.4539
37.846	-57.5861	-49.4444	-32.7992	-42.7606	-37.4627
37.8786	-57.6326	-49.3886	-32.8094	-42.745	-37.4706
37.9112	-57.678	-49.3321	-32.8208	-42.7307	-37.4778
37.9439	-57.7224	-49.2752	-32.8336	-42.7175	-37.4842
37.9765	-57.7656	-49.2179	-32.8477	-42.7055	-37.49
38.0091	-57.8077	-49.1605	-32.863	-42.6947	-37.4952
38.0418	-57.8485	-49.1032	-32.8797	-42.685	-37.4999
38.0744	-57.8882	-49.0462	-32.8976	-42.6764	-37.504
38.107	-57.9266	-48.9897	-32.9168	-42.6689	-37.5077
38.1397	-57.9637	-48.9339	-32.9373	-42.6624	-37.511
38.1723	-57.9996	-48.879	-32.9589	-42.6569	-37.514
38.205	-58.0343	-48.8251	-32.9816	-42.6523	-37.5166
38.2376	-58.0678	-48.7724	-33.0054	-42.6486	-37.5189
38.2702	-58.1001	-48.7212	-33.0302	-42.6456	-37.5209
38.3029	-58.1314	-48.6716	-33.056	-42.6434	-37.5227
38.3355	-58.1617	-48.6237	-33.0826	-42.6419	-37.5243
38.3681	-58.191	-48.5776	-33.11	-42.641	-37.5256
38.4008	-58.2195	-48.5336	-33.1381	-42.6407	-37.5268
38.4334	-58.2471	-48.4917	-33.1669	-42.6408	-37.5277
38.4661	-58.2741	-48.4521	-33.1962	-42.6415	-37.5284
38.4987	-58.3005	-48.4148	-33.2259	-42.6426	-37.5289
38.5313	-58.3264	-48.38	-33.256	-42.6441	-37.5292
38.564	-58.3519	-48.3478	-33.2864	-42.646	-37.5292
38.5966	-58.377	-48.3182	-33.3169	-42.6482	-37.529
38.6292	-58.402	-48.2913	-33.3476	-42.6509	-37.5285
38.6619	-58.4268	-48.2672	-33.3782	-42.6539	-37.5278
38.6945	-58.4516	-48.2458	-33.4087	-42.6574	-37.5268
38.7272	-58.4766	-48.2272	-33.4391	-42.6612	-37.5255
38.7598	-58.5017	-48.2114	-33.4691	-42.6655	-37.5238
38.7924	-58.5271	-48.1984	-33.4988	-42.6702	-37.5218
38.8251	-58.5529	-48.1881	-33.5281	-42.6754	-37.5195
38.8577	-58.5792	-48.1806	-33.5568	-42.6811	-37.5168
38.8903	-58.606	-48.1757	-33.5849	-42.6874	-37.5137
38.923	-58.6336	-48.1734	-33.6124	-42.6942	-37.5103
38.9556	-58.6618	-48.1738	-33.6391	-42.7016	-37.5064
38.9883	-58.6908	-48.1766	-33.665	-42.7097	-37.5022
39.0209	-58.7208	-48.1818	-33.6901	-42.7185	-37.4976
39.0535	-58.7516	-48.1893	-33.7143	-42.7281	-37.4926
39.0862	-58.7834	-48.1991	-33.7375	-42.7384	-37.4873
39.1188	-58.8163	-48.2111	-33.7597	-42.7496	-37.4816
39.1514	-58.8502	-48.2251	-33.781	-42.7616	-37.4755
39.1841	-58.8852	-48.2411	-33.8012	-42.7746	-37.4691
39.2167	-58.9213	-48.2589	-33.8204	-42.7885	-37.4624
39.2493	-58.9586	-48.2785	-33.8386	-42.8034	-37.4553
39.282	-58.997	-48.2997	-33.8558	-42.8193	-37.448
39.3146	-59.0365	-48.3226	-33.8719	-42.8363	-37.4405
39.3473	-59.0772	-48.3469	-33.8871	-42.8544	-37.4327
39.3799	-59.119	-48.3726	-33.9014	-42.8737	-37.4247
39.4125	-59.1618	-48.3995	-33.9147	-42.894	-37.4166
39.4452	-59.2057	-48.4278	-33.9271	-42.9155	-37.4083
39.4778	-59.2505	-48.4571	-33.9386	-42.9382	-37.3999
39.5104	-59.2962	-48.4876	-33.9494	-42.962	-37.3916
39.5431	-59.3427	-48.5192	-33.9593	-42.987	-37.3832
39.5757	-59.39	-48.5517	-33.9684	-43.0131	-37.3749
39.6084	-59.4379	-48.5852	-33.9769	-43.0404	-37.3667
39.641	-59.4863	-48.6197	-33.9846	-43.0689	-37.3587
39.6736	-59.5351	-48.6551	-33.9917	-43.0985	-37.3509
39.7063	-59.5842	-48.6914	-33.9982	-43.1293	-37.3435
39.7389	-59.6334	-48.7286	-34.0042	-43.1612	-37.3365
39.7715	-59.6827	-48.7667	-34.0096	-43.1942	-37.3299
39.8042	-59.7319	-48.8058	-34.0146	-43.2284	-37.3239
39.8368	-59.7808	-48.8457	-34.019	-43.2637	-37.3184
39.8695	-59.8294	-48.8865	-34.0231	-43.3001	-37.3137
39.9021	-59.8774	-48.9283	-34.0268	-43.3376	-37.3097
39.9347	-59.9248	-48.971	-34.0301	-43.3762	-37.3066
39.9674	-59.9714	-49.0148	-34.033	-43.4158	-37.3044
40	-60.0172	-49.0596	-34.0356	-43.4564	-37.3032
40.0326	-60.062	-49.1055	-34.038	-43.4979	-37.3031
40.0653	-60.1058	-49.1526	-34.04	-43.5404	-37.3042
40.0979	-60.1483	-49.2008	-34.0418	-43.5838	-37.3065
40.1305	-60.1897	-49.2504	-34.0433	-43.628	-37.3101
40.1632	-60.2298	-49.3012	-34.0446	-43.673	-37.3151
40.1958	-60.2685	-49.3534	-34.0457	-43.7187	-37.3216
40.2285	-60.3058	-49.4071	-34.0465	-43.7651	-37.3296
40.2611	-60.3417	-49.4622	-34.0472	-43.8121	-37.3392
40.2937	-60.3762	-49.519	-34.0476	-43.8596	-37.3503
40.3264	-60.4092	-49.5773	-34.0479	-43.9076	-37.3631
40.359	-60.4408	-49.6373	-34.048	-43.956	-37.3777
40.3916	-60.471	-49.6991	-34.0479	-44.0047	-37.3939
40.4243	-60.4997	-49.7626	-34.0476	-44.0537	-37.4119
40.4569	-60.5272	-49.8279	-34.0471	-44.1029	-37.4316
40.4896	-60.5533	-49.8951	-34.0464	-44.1521	-37.453
40.5222	-60.5782	-49.9641	-34.0455	-44.2014	-37.4762
40.5548	-60.602	-50.0351	-34.0444	-44.2507	-37.5011
40.5875	-60.6247	-50.1079	-34.0431	-44.2999	-37.5277
40.6201	-60.6465	-50.1825	-34.0416	-44.3489	-37.5559
40.6527	-60.6674	-50.2591	-34.0398	-44.3978	-37.5858
40.6854	-60.6877	-50.3374	-34.0378	-44.4464	-37.6172
40.718	-60.7073	-50.4176	-34.0356	-44.4946	-37.6501
40.7507	-60.7265	-50.4995	-34.0331	-44.5426	-37.6845
40.7833	-60.7454	-50.583	-34.0303	-44.5901	-37.7202
40.8159	-60.7642	-50.6682	-34.0273	-44.6372	-37.7572
40.8486	-60.7829	-50.755	-34.0241	-44.6838	-37.7955
40.8812	-60.8019	-50.8432	-34.0205	-44.7299	-37.835
40.9138	-60.8212	-50.9328	-34.0167	-44.7754	-37.8755
40.9465	-60.841	-51.0237	-34.0126	-44.8204	-37.9171
40.9791	-60.8616	-51.1158	-34.0083	-44.8647	-37.9597
41.0117	-60.883	-51.209	-34.0036	-44.9085	-38.0032
41.0444	-60.9054	-51.3032	-33.9987	-44.9518	-38.0474
41.077	-60.9291	-51.3984	-33.9936	-44.9944	-38.0924
41.1097	-60.9541	-51.4943	-33.9881	-45.0366	-38.1381
41.1423	-60.9807	-51.5909	-33.9825	-45.0783	-38.1844
41.1749	-61.0091	-51.688	-33.9766	-45.1195	-38.2312
41.2076	-61.0393	-51.7856	-33.9706	-45.1604	-38.2785
41.2402	-61.0716	-51.8834	-33.9645	-45.2009	-38.3262
41.2728	-61.1061	-51.9815	-33.9582	-45.2412	-38.3741
41.3055	-61.1429	-52.0795	-33.952	-45.2813	-38.4223
41.3381	-61.1821	-52.1773	-33.9457	-45.3212	-38.4707
41.3708	-61.2239	-52.2749	-33.9395	-45.3611	-38.5193
41.4034	-61.2684	-52.3721	-33.9335	-45.401	-38.5678
41.436	-61.3156	-52.4687	-33.9276	-45.441	-38.6163
41.4687	-61.3656	-52.5645	-33.922	-45.4811	-38.6647
41.5013	-61.4185	-52.6595	-33.9167	-45.5215	-38.713
41.5339	-61.4744	-52.7536	-33.9117	-45.5622	-38.7611
41.5666	-61.5333	-52.8465	-33.9073	-45.6033	-38.8088
41.5992	-61.5952	-52.9383	-33.9033	-45.6448	-38.8562
41.6319	-61.6602	-53.0288	-33.9	-45.6869	-38.9033
41.6645	-61.7283	-53.118	-33.8973	-45.7296	-38.9498
41.6971	-61.7995	-53.2058	-33.8953	-45.7731	-38.9959
41.7298	-61.8737	-53.2921	-33.8941	-45.8174	-39.0414
41.7624	-61.951	-53.3769	-33.8938	-45.8626	-39.0863
41.795	-62.0313	-53.4602	-33.8944	-45.9088	-39.1306
41.8277	-62.1147	-53.542	-33.8959	-45.9561	-39.1743
41.8603	-62.201	-53.6222	-33.8983	-46.0047	-39.2172
41.893	-62.2902	-53.7009	-33.9018	-46.0545	-39.2594
41.9256	-62.3823	-53.7781	-33.9063	-46.1057	-39.3008
41.9582	-62.4773	-53.8539	-33.9118	-46.1585	-39.3415
41.9909	-62.575	-53.9283	-33.9184	-46.2128	-39.3814
42.0235	-62.6755	-54.0014	-33.9261	-46.2688	-39.4206
42.0561	-62.7786	-54.0732	-33.9348	-46.3265	-39.4591
42.0888	-62.8842	-54.144	-33.9445	-46.386	-39.4967
42.1214	-62.9923	-54.2137	-33.9553	-46.4475	-39.5337
42.154	-63.1028	-54.2825	-33.9672	-46.5109	-39.57
42.1867	-63.2156	-54.3506	-33.9801	-46.5763	-39.6057
42.2193	-63.3306	-54.418	-33.994	-46.6439	-39.6407
42.252	-63.4477	-54.4849	-34.0089	-46.7135	-39.6751
42.2846	-63.5668	-54.5515	-34.0248	-46.7854	-39.709
42.3172	-63.6879	-54.6178	-34.0417	-46.8595	-39.7423
42.3499	-63.8108	-54.6841	-34.0595	-46.9358	-39.7752
42.3825	-63.9355	-54.7506	-34.0783	-47.0145	-39.8077
42.4151	-64.0619	-54.8173	-34.098	-47.0955	-39.8398
42.4478	-64.1899	-54.8845	-34.1187	-47.1788	-39.8715
42.4804	-64.3194	-54.9522	-34.1402	-47.2645	-39.9029
42.5131	-64.4505	-55.0208	-34.1626	-47.3525	-39.9341
42.5457	-64.5831	-55.0903	-34.1859	-47.4428	-39.965
42.5783	-64.717	-55.1609	-34.2101	-47.5354	-39.9957
42.611	-64.8524	-55.2328	-34.2351	-47.6304	-40.0262
42.6436	-64.9891	-55.306	-34.261	-47.7276	-40.0564
42.6762	-65.1271	-55.3807	-34.2877	-47.827	-40.0865
42.7089	-65.2664	-55.4571	-34.3153	-47.9285	-40.1163
42.7415	-65.4071	-55.5353	-34.3437	-48.0322	-40.1459
42.7742	-65.5491	-55.6153	-34.3729	-48.138	-40.1754
42.8068	-65.6925	-55.6973	-34.4031	-48.2457	-40.2046
42.8394	-65.8372	-55.7813	-34.4341	-48.3554	-40.2336
42.8721	-65.9833	-55.8675	-34.4659	-48.467	-40.2623
42.9047	-66.1309	-55.9559	-34.4987	-48.5803	-40.2908
42.9373	-66.2799	-56.0465	-34.5323	-48.6954	-40.319
42.97	-66.4305	-56.1396	-34.567	-48.8122	-40.347
43.0026	-66.5828	-56.235	-34.6025	-48.9305	-40.3747
43.0352	-66.7367	-56.3329	-34.639	-49.0503	-40.4022
43.0679	-66.8924	-56.4333	-34.6766	-49.1716	-40.4294
43.1005	-67.0499	-56.5362	-34.7151	-49.2943	-40.4563
43.1332	-67.2093	-56.6416	-34.7547	-49.4183	-40.4831
43.1658	-67.3707	-56.7496	-34.7954	-49.5435	-40.5096
43.1984	-67.5342	-56.8601	-34.8372	-49.6699	-40.5359
43.2311	-67.6998	-56.9731	-34.8802	-49.7973	-40.562
43.2637	-67.8676	-57.0887	-34.9243	-49.9258	-40.5879
43.2963	-68.0376	-57.2067	-34.9697	-50.0552	-40.6137
43.329	-68.21	-57.3272	-35.0163	-50.1855	-40.6395
43.3616	-68.3848	-57.4501	-35.0643	-50.3165	-40.6651
43.3943	-68.5621	-57.5752	-35.1136	-50.4483	-40.6907
43.4269	-68.7419	-57.7026	-35.1642	-50.5807	-40.7163
43.4595	-68.9243	-57.8322	-35.2163	-50.7138	-40.742
43.4922	-69.1093	-57.9638	-35.2698	-50.8473	-40.7677
43.5248	-69.297	-58.0974	-35.3248	-50.9813	-40.7936
43.5574	-69.4875	-58.2329	-35.3812	-51.1157	-40.8196
43.5901	-69.6808	-58.3701	-35.4392	-51.2504	-40.8459
43.6227	-69.877	-58.509	-35.4988	-51.3855	-40.8724
43.6554	-70.0761	-58.6495	-35.5599	-51.5208	-40.8993
43.688	-70.2781	-58.7915	-35.6225	-51.6564	-40.9266
43.7206	-70.4831	-58.9349	-35.6868	-51.7923	-40.9543
43.7533	-70.6912	-59.0795	-35.7526	-51.9284	-40.9826
43.7859	-70.9022	-59.2254	-35.82	-52.0647	-41.0113
43.8185	-71.1163	-59.3724	-35.889	-52.2012	-41.0408
43.8512	-71.3335	-59.5204	-35.9595	-52.338	-41.0708
43.8838	-71.5537	-59.6694	-36.0316	-52.475	-41.1016
43.9164	-71.777	-59.8192	-36.105	-52.6123	-41.1332
43.9491	-72.0032	-59.97	-36.1799	-52.7499	-41.1656
43.9817	-72.2325	-60.1215	-36.2562	-52.8879	-41.1989
44.0144	-72.4647	-60.2737	-36.3338	-53.0262	-41.2331
44.047	-72.6998	-60.4267	-36.4126	-53.165	-41.2683
44.0796	-72.9378	-60.5803	-36.4926	-53.3042	-41.3045
44.1123	-73.1785	-60.7347	-36.5736	-53.4439	-41.3418
44.1449	-73.4219	-60.8896	-36.6556	-53.5842	-41.3803
44.1775	-73.6678	-61.0452	-36.7385	-53.725	-41.4199
44.2102	-73.9163	-61.2014	-36.8222	-53.8665	-41.4608
44.2428	-74.1671	-61.3583	-36.9067	-54.0087	-41.503
44.2755	-74.4202	-61.5159	-36.9917	-54.1516	-41.5465
44.3081	-74.6754	-61.6741	-37.0772	-54.2954	-41.5915
44.3407	-74.9327	-61.833	-37.1632	-54.44	-41.638
44.3734	-75.1919	-61.9927	-37.2494	-54.5855	-41.686
44.406	-75.4529	-62.1532	-37.3359	-54.7319	-41.7357
44.4386	-75.7156	-62.3146	-37.4225	-54.8793	-41.787
44.4713	-75.9799	-62.4768	-37.5092	-55.0277	-41.8401
44.5039	-76.2456	-62.6401	-37.5958	-55.1772	-41.8951
44.5366	-76.5125	-62.8043	-37.6823	-55.3278	-41.952
44.5692	-76.7807	-62.9697	-37.7686	-55.4794	-42.0108
44.6018	-77.0499	-63.1362	-37.8548	-55.6321	-42.0716
44.6345	-77.3199	-63.3038	-37.9406	-55.7859	-42.1345
44.6671	-77.5908	-63.4728	-38.0261	-55.9409	-42.1996
44.6997	-77.8622	-63.643	-38.1113	-56.0969	-42.2668
44.7324	-78.1341	-63.8146	-38.1961	-56.254	-42.3363
44.765	-78.4064	-63.9875	-38.2804	-56.4121	-42.408
44.7977	-78.6789	-64.1618	-38.3643	-56.5713	-42.482
44.8303	-78.9514	-64.3376	-38.4477	-56.7314	-42.5584
44.8629	-79.2239	-64.5149	-38.5306	-56.8926	-42.6371
44.8956	-79.4961	-64.6936	-38.613	-57.0547	-42.7182
44.9282	-79.7681	-64.8738	-38.6949	-57.2177	-42.8017
44.9608	-80.0395	-65.0555	-38.7764	-57.3815	-42.8877
44.9935	-80.3104	-65.2387	-38.8574	-57.5461	-42.9761
45.0261	-80.5806	-65.4234	-38.938	-57.7115	-43.0669
45.0587	-80.8499	-65.6096	-39.0181	-57.8774	-43.1602
45.0914	-81.1183	-65.7972	-39.0979	-58.0439	-43.2559
45.124	-81.3857	-65.9863	-39.1773	-58.2109	-43.354
45.1567	-81.6519	-66.1767	-39.2564	-58.3782	-43.4546
45.1893	-81.9168	-66.3684	-39.3353	-58.5457	-43.5575
45.2219	-82.1804	-66.5614	-39.4139	-58.7134	-43.6629
45.2546	-82.4425	-66.7556	-39.4923	-58.881	-43.7706
45.2872	-82.7031	-66.951	-39.5706	-59.0485	-43.8807
45.3198	-82.9622	-67.1475	-39.6489	-59.2157	-43.9931
45.3525	-83.2195	-67.3449	-39.7271	-59.3824	-44.1078
45.3851	-83.4751	-67.5433	-39.8054	-59.5486	-44.2248
45.4178	-83.729	-67.7426	-39.8838	-59.7141	-44.3441
45.4504	-83.9809	-67.9425	-39.9624	-59.8787	-44.4656
45.483	-84.231	-68.1431	-40.0412	-60.0423	-44.5893
45.5157	-84.4791	-68.3442	-40.1203	-60.2048	-44.7153
45.5483	-84.7253	-68.5456	-40.1998	-60.3659	-44.8435
45.5809	-84.9694	-68.7473	-40.2798	-60.5256	-44.9738
45.6136	-85.2115	-68.9491	-40.3603	-60.6838	-45.1064
45.6462	-85.4516	-69.1509	-40.4414	-60.8402	-45.2412
45.6789	-85.6896	-69.3524	-40.5231	-60.9947	-45.3783
45.7115	-85.9256	-69.5535	-40.6056	-61.1472	-45.5175
45.7441	-86.1595	-69.7541	-40.6888	-61.2977	-45.659
45.7768	-86.3914	-69.954	-40.7729	-61.4459	-45.8028
45.8094	-86.6212	-70.1529	-40.8579	-61.5918	-45.9488
45.842	-86.849	-70.3507	-40.9439	-61.7353	-46.097
45.8747	-87.0747	-70.5472	-41.0309	-61.8763	-46.2475
45.9073	-87.2984	-70.7421	-41.1189	-62.0147	-46.4003
45.9399	-87.5202	-70.9353	-41.2081	-62.1505	-46.5552
45.9726	-87.7399	-71.1266	-41.2983	-62.2836	-46.7124
46.0052	-87.9576	-71.3157	-41.3897	-62.4139	-46.8718
46.0379	-88.1734	-71.5024	-41.4824	-62.5414	-47.0334
46.0705	-88.3872	-71.6864	-41.5762	-62.666	-47.1971
46.1031	-88.599	-71.8677	-41.6712	-62.7878	-47.3629
46.1358	-88.8088	-72.0459	-41.7674	-62.9066	-47.5308
46.1684	-89.0166	-72.2209	-41.8649	-63.0225	-47.7007
46.201	-89.2224	-72.3924	-41.9635	-63.1355	-47.8726
46.2337	-89.4261	-72.5603	-42.0633	-63.2455	-48.0465
46.2663	-89.6278	-72.7243	-42.1644	-63.3526	-48.2222
46.299	-89.8273	-72.8843	-42.2665	-63.4567	-48.3998
46.3316	-90.0247	-73.0401	-42.3698	-63.5579	-48.5792
46.3642	-90.2199	-73.1916	-42.4742	-63.6562	-48.7602
46.3969	-90.4128	-73.3387	-42.5797	-63.7517	-48.943
46.4295	-90.6035	-73.4811	-42.6862	-63.8443	-49.1274
46.4621	-90.7918	-73.6188	-42.7936	-63.9341	-49.3133
46.4948	-90.9776	-73.7517	-42.902	-64.0211	-49.5008
46.5274	-91.161	-73.8797	-43.0113	-64.1054	-49.6896
46.5601	-91.3417	-74.0027	-43.1215	-64.1869	-49.8799
46.5927	-91.5196	-74.1206	-43.2324	-64.2658	-50.0715
46.6253	-91.6948	-74.2332	-43.3441	-64.342	-50.2643
46.658	-91.8669	-74.3406	-43.4565	-64.4155	-50.4583
46.6906	-92.036	-74.4426	-43.5696	-64.4864	-50.6534
46.7232	-92.2019	-74.5391	-43.6833	-64.5547	-50.8497
46.7559	-92.3644	-74.6302	-43.7975	-64.6204	-51.0469
46.7885	-92.5234	-74.7157	-43.9122	-64.6835	-51.2451
46.8211	-92.6787	-74.7955	-44.0274	-64.744	-51.4443
46.8538	-92.8302	-74.8697	-44.1429	-64.8019	-51.6443
46.8864	-92.9777	-74.9381	-44.2588	-64.8571	-51.8451
46.9191	-93.121	-75.0007	-44.375	-64.9098	-52.0468
46.9517	-93.2599	-75.0575	-44.4914	-64.9597	-52.2491
46.9843	-93.3943	-75.1083	-44.608	-65.007	-52.4522
47.017	-93.524	-75.1532	-44.7247	-65.0516	-52.6558
47.0496	-93.6488	-75.1921	-44.8416	-65.0934	-52.8601
47.0822	-93.7685	-75.2249	-44.9584	-65.1324	-53.0648
47.1149	-93.8829	-75.2516	-45.0753	-65.1685	-53.27
47.1475	-93.9919	-75.2722	-45.1921	-65.2017	-53.4757
47.1802	-94.0952	-75.2866	-45.3088	-65.2319	-53.6816
47.2128	-94.1927	-75.2949	-45.4254	-65.2591	-53.8879
47.2454	-94.2843	-75.2969	-45.5419	-65.283	-54.0943
47.2781	-94.3697	-75.2926	-45.6581	-65.3037	-54.301
47.3107	-94.4489	-75.2821	-45.7741	-65.3211	-54.5077
47.3433	-94.5215	-75.2653	-45.8898	-65.335	-54.7144
47.376	-94.5875	-75.2422	-46.0053	-65.3454	-54.9212
47.4086	-94.6468	-75.2128	-46.1204	-65.3522	-55.1278
47.4413	-94.6991	-75.177	-46.2352	-65.3552	-55.3344
47.4739	-94.7443	-75.1349	-46.3495	-65.3542	-55.5408
47.5065	-94.7823	-75.0865	-46.4635	-65.3493	-55.7469
47.5392	-94.8129	-75.0317	-46.5771	-65.3401	-55.9529
47.5718	-94.8361	-74.9705	-46.6903	-65.3267	-56.1586
47.6044	-94.8516	-74.903	-46.803	-65.3088	-56.364
47.6371	-94.8594	-74.829	-46.9152	-65.2863	-56.5692
47.6697	-94.8594	-74.7487	-47.0271	-65.259	-56.7741
47.7023	-94.8514	-74.662	-47.1384	-65.2268	-56.9787
47.735	-94.8354	-74.5689	-47.2493	-65.1894	-57.1831
47.7676	-94.8113	-74.4693	-47.3597	-65.1468	-57.3872
47.8003	-94.779	-74.3634	-47.4697	-65.0988	-57.591
47.8329	-94.7385	-74.2509	-47.5791	-65.0451	-57.7947
47.8655	-94.6897	-74.132	-47.6881	-64.9858	-57.9981
47.8982	-94.6325	-74.0066	-47.7967	-64.9205	-58.2013
47.9308	-94.567	-73.8747	-47.9047	-64.8492	-58.4043
47.9634	-94.4929	-73.7362	-48.0122	-64.7716	-58.6072
47.9961	-94.4104	-73.5911	-48.1193	-64.6877	-58.8099
48.0287	-94.3194	-73.4394	-48.2258	-64.5974	-59.0124
48.0614	-94.2198	-73.281	-48.3319	-64.5004	-59.2149
48.094	-94.1117	-73.1159	-48.4374	-64.3967	-59.4171
48.1266	-93.995	-72.944	-48.5424	-64.2861	-59.6193
48.1593	-93.8698	-72.7654	-48.6469	-64.1686	-59.8212
48.1919	-93.736	-72.5799	-48.7508	-64.0441	-60.023
48.2245	-93.5936	-72.3876	-48.8542	-63.9124	-60.2246
48.2572	-93.4428	-72.1885	-48.9569	-63.7736	-60.426
48.2898	-93.2834	-71.9824	-49.0591	-63.6275	-60.6271
48.3225	-93.1155	-71.7693	-49.1606	-63.4741	-60.8279
48.3551	-92.9391	-71.5494	-49.2615	-63.3134	-61.0285
48.3877	-92.7544	-71.3226	-49.3616	-63.1453	-61.2286
48.4204	-92.5613	-71.0889	-49.4611	-62.9698	-61.4284
48.453	-92.3599	-70.8482	-49.5598	-62.787	-61.6277
48.4856	-92.1502	-70.6008	-49.6577	-62.5968	-61.8265
48.5183	-91.9323	-70.3465	-49.7548	-62.3993	-62.0248
48.5509	-91.7062	-70.0854	-49.8511	-62.1946	-62.2223
48.5836	-91.4721	-69.8176	-49.9464	-61.9825	-62.4191
48.6162	-91.2299	-69.5432	-50.0408	-61.7633	-62.615
48.6488	-90.9796	-69.2622	-50.1342	-61.537	-62.81
48.6815	-90.7215	-68.9746	-50.2265	-61.3035	-63.0038
48.7141	-90.4554	-68.6806	-50.3178	-61.0631	-63.1965
48.7467	-90.1815	-68.3802	-50.408	-60.8159	-63.3878
48.7794	-89.8998	-68.0735	-50.4971	-60.5619	-63.5776
48.812	-89.6104	-67.7607	-50.5849	-60.3012	-63.7658
48.8446	-89.3133	-67.4419	-50.6716	-60.0341	-63.9523
48.8773	-89.0087	-67.1171	-50.757	-59.7605	-64.1368
48.9099	-88.6965	-66.7865	-50.841	-59.4808	-64.3192
48.9426	-88.377	-66.4502	-50.9238	-59.1951	-64.4994
48.9752	-88.0501	-66.1083	-51.0051	-58.9035	-64.6773
49.0078	-87.716	-65.761	-51.085	-58.6063	-64.8525
49.0405	-87.3747	-65.4085	-51.1634	-58.3036	-65.0251
49.0731	-87.0264	-65.0508	-51.2403	-57.9957	-65.1948
49.1057	-86.6713	-64.6882	-51.3156	-57.6828	-65.3614
49.1384	-86.3094	-64.3209	-51.3894	-57.3651	-65.5248
49.171	-85.9408	-63.9489	-51.4615	-57.0429	-65.6849
49.2037	-85.5658	-63.5724	-51.5319	-56.7163	-65.8414
49.2363	-85.1844	-63.1917	-51.6005	-56.3857	-65.9943
49.2689	-84.7969	-62.8069	-51.6674	-56.0514	-66.1434
49.3016	-84.4033	-62.4182	-51.7324	-55.7134	-66.2884
49.3342	-84.0038	-62.0258	-51.7955	-55.3722	-66.4293
49.3668	-83.5986	-61.6298	-51.8566	-55.028	-66.5659
49.3995	-83.1879	-61.2305	-51.9157	-54.6809	-66.698
49.4321	-82.7718	-60.8281	-51.9727	-54.3313	-66.8256
49.4648	-82.3504	-60.4227	-52.0275	-53.9794	-66.9484
49.4974	-81.9241	-60.0147	-52.0801	-53.6255	-67.0665
49.53	-81.4928	-59.6041	-52.1304	-53.2697	-67.1795
49.5627	-81.0569	-59.1913	-52.1784	-52.9123	-67.2874
49.5953	-80.6166	-58.7764	-52.224	-52.5536	-67.3902
49.6279	-80.1719	-58.3597	-52.2671	-52.1937	-67.4876
49.6606	-79.7232	-57.9414	-52.3076	-51.8328	-67.5796
49.6932	-79.2706	-57.5218	-52.3455	-51.4712	-67.6661
49.7258	-78.8144	-57.1012	-52.3808	-51.109	-67.7471
49.7585	-78.3548	-56.6798	-52.4133	-50.7464	-67.8223
49.7911	-77.892	-56.2578	-52.443	-50.3836	-67.8917
49.8238	-77.4262	-55.8355	-52.4699	-50.0208	-67.9554
49.8564	-76.9577	-55.4132	-52.4938	-49.6581	-68.0131
49.889	-76.4867	-54.9912	-52.5146	-49.2957	-68.0648
49.9217	-76.0134	-54.5696	-52.5324	-48.9337	-68.1105
49.9543	-75.5382	-54.1488	-52.547	-48.5723	-68.1502
49.9869	-75.0612	-53.729	-52.5584	-48.2117	-68.1837
50.0196	-74.5826	-53.3105	-52.5664	-47.852	-68.2111
50.0522	-74.1028	-52.8934	-52.571	-47.4933	-68.2323
50.0849	-73.622	-52.478	-52.5722	-47.1357	-68.2472
50.1175	-73.1405	-52.0645	-52.5697	-46.7795	-68.2559
50.1501	-72.6584	-51.6532	-52.5637	-46.4248	-68.2583
50.1828	-72.176	-51.2442	-52.5539	-46.0716	-68.2545
50.2154	-71.6936	-50.8378	-52.5403	-45.7202	-68.2443
50.248	-71.2114	-50.4341	-52.5229	-45.3706	-68.2278
50.2807	-70.7297	-50.0332	-52.5015	-45.023	-68.205
50.3133	-70.2488	-49.6355	-52.4761	-44.6775	-68.1758
50.346	-69.7687	-49.241	-52.4467	-44.3343	-68.1403
50.3786	-69.2898	-48.8498	-52.4131	-43.9933	-68.0985
50.4112	-68.8123	-48.4622	-52.3753	-43.6548	-68.0502
50.4439	-68.3364	-48.0784	-52.3333	-43.3188	-67.9956
50.4765	-67.8623	-47.6983	-52.2869	-42.9853	-67.9347
50.5091	-67.3903	-47.3223	-52.2363	-42.6546	-67.8673
50.5418	-66.9205	-46.9504	-52.1812	-42.3266	-67.7936
50.5744	-66.4531	-46.5827	-52.1217	-42.0015	-67.7134
50.607	-65.9882	-46.2195	-52.0578	-41.6793	-67.6268
50.6397	-65.5262	-45.8607	-51.9895	-41.36	-67.5337
50.6723	-65.0671	-45.5065	-51.9167	-41.0438	-67.4342
50.705	-64.611	-45.1571	-51.8394	-40.7307	-67.3281
50.7376	-64.1582	-44.8126	-51.7578	-40.4209	-67.2155
50.7702	-63.7087	-44.4729	-51.6716	-40.1143	-67.0963
50.8029	-63.2627	-44.1383	-51.5811	-39.811	-66.9704
50.8355	-62.8203	-43.8088	-51.4862	-39.5112	-66.8379
50.8681	-62.3817	-43.4844	-51.3869	-39.215	-66.6987
50.9008	-61.9469	-43.1653	-51.2833	-38.9224	-66.5528
50.9334	-61.516	-42.8516	-51.1755	-38.6334	-66.4001
50.9661	-61.0891	-42.5432	-51.0634	-38.3484	-66.2406
50.9987	-60.6663	-42.2404	-50.9471	-38.0672	-66.0743
51.0313	-60.2477	-41.943	-50.8267	-37.79	-65.9011
51.064	-59.8334	-41.6512	-50.7023	-37.517	-65.7212
51.0966	-59.4234	-41.365	-50.5739	-37.2483	-65.5343
51.1292	-59.0178	-41.0846	-50.4415	-36.9839	-65.3406
51.1619	-58.6168	-40.8098	-50.3053	-36.724	-65.14
51.1945	-58.2204	-40.5408	-50.1653	-36.4687	-64.9326
51.2272	-57.8285	-40.2775	-50.0215	-36.2181	-64.7184
51.2598	-57.4414	-40.02	-49.8741	-35.9723	-64.4974
51.2924	-57.059	-39.7682	-49.7231	-35.7314	-64.2697
51.3251	-56.6815	-39.5223	-49.5686	-35.4956	-64.0352
51.3577	-56.3087	-39.2821	-49.4105	-35.2649	-63.7942
51.3903	-55.9409	-39.0476	-49.249	-35.0394	-63.5465
51.423	-55.578	-38.8189	-49.0842	-34.8193	-63.2924
51.4556	-55.22	-38.5958	-48.9159	-34.6045	-63.0319
51.4883	-54.867	-38.3784	-48.7444	-34.3953	-62.7651
51.5209	-54.519	-38.1666	-48.5696	-34.1916	-62.492
51.5535	-54.1759	-37.9603	-48.3916	-33.9935	-62.213
51.5862	-53.8379	-37.7596	-48.2103	-33.8011	-61.9279
51.6188	-53.5049	-37.5644	-48.026	-33.6145	-61.6371
51.6514	-53.177	-37.3747	-47.8385	-33.4336	-61.3405
51.6841	-52.854	-37.1903	-47.6478	-33.2585	-61.0385
51.7167	-52.5361	-37.0113	-47.4541	-33.0893	-60.7311
51.7493	-52.2233	-36.8376	-47.2574	-32.9259	-60.4185
51.782	-51.9155	-36.6693	-47.0576	-32.7684	-60.1009
51.8146	-51.6128	-36.5061	-46.8548	-32.6167	-59.7784
51.8473	-51.3151	-36.3483	-46.649	-32.4709	-59.4512
51.8799	-51.0224	-36.1956	-46.4402	-32.3308	-59.1196
51.9125	-50.7348	-36.048	-46.2285	-32.1966	-58.7837
51.9452	-50.4523	-35.9057	-46.0138	-32.0681	-58.4437
51.9778	-50.1747	-35.7684	-45.7961	-31.9452	-58.0998
52.0104	-49.9022	-35.6362	-45.5756	-31.828	-57.7523
52.0431	-49.6348	-35.509	-45.3522	-31.7163	-57.4013
52.0757	-49.3723	-35.3869	-45.126	-31.61	-57.0472
52.1084	-49.1149	-35.2696	-44.897	-31.5092	-56.6901
52.141	-48.8624	-35.1573	-44.6652	-31.4136	-56.3303
52.1736	-48.615	-35.0498	-44.4307	-31.3231	-55.968
52.2063	-48.3725	-34.947	-44.1936	-31.2377	-55.6035
52.2389	-48.135	-34.849	-43.9539	-31.1572	-55.237
52.2715	-47.9024	-34.7555	-43.7116	-31.0815	-54.8688
52.3042	-47.6748	-34.6666	-43.4668	-31.0104	-54.4991
52.3368	-47.4521	-34.5821	-43.2197	-30.9438	-54.1281
52.3695	-47.2343	-34.5019	-42.9703	-30.8814	-53.7562
52.4021	-47.0213	-34.4261	-42.7186	-30.8231	-53.3835
52.4347	-46.8132	-34.3544	-42.4648	-30.7687	-53.0103
52.4674	-46.6099	-34.2869	-42.209	-30.718	-52.6369
52.5	-46.4113	-34.2233	-41.9512	-30.6708	-52.2634
52.5326	-46.2173	-34.1636	-41.6917	-30.6269	-51.8901
52.5653	-46.0281	-34.1078	-41.4305	-30.5861	-51.5172
52.5979	-45.8434	-34.0556	-41.1677	-30.5481	-51.1449
52.6305	-45.6632	-34.007	-40.9035	-30.5128	-50.7734
52.6632	-45.4874	-33.9619	-40.638	-30.4799	-50.4029
52.6958	-45.3161	-33.9202	-40.3714	-30.4492	-50.0336
52.7285	-45.1491	-33.8817	-40.1039	-30.4205	-49.6657
52.7611	-44.9863	-33.8463	-39.8355	-30.3936	-49.2993
52.7937	-44.8276	-33.8139	-39.5665	-30.3683	-48.9345
52.8264	-44.6731	-33.7844	-39.2969	-30.3444	-48.5716
52.859	-44.5225	-33.7577	-39.0271	-30.3217	-48.2107
52.8916	-44.3759	-33.7335	-38.7572	-30.2999	-47.8519
52.9243	-44.233	-33.7119	-38.4873	-30.279	-47.4954
52.9569	-44.0939	-33.6927	-38.2177	-30.2586	-47.1412
52.9896	-43.9584	-33.6758	-37.9484	-30.2387	-46.7896
53.0222	-43.8264	-33.661	-37.6798	-30.219	-46.4405
53.0548	-43.6979	-33.6482	-37.4121	-30.1995	-46.0941
53.0875	-43.5727	-33.6374	-37.1453	-30.1799	-45.7506
53.1201	-43.4507	-33.6284	-36.8797	-30.1601	-45.4099
53.1527	-43.3319	-33.621	-36.6156	-30.1401	-45.0722
53.1854	-43.2162	-33.6152	-36.353	-30.1196	-44.7375
53.218	-43.1034	-33.6108	-36.0923	-30.0986	-44.406
53.2507	-42.9935	-33.6078	-35.8335	-30.077	-44.0777
53.2833	-42.8863	-33.6061	-35.5769	-30.0547	-43.7527
53.3159	-42.7819	-33.6054	-35.3227	-30.0317	-43.431
53.3486	-42.68	-33.6057	-35.071	-30.0079	-43.1127
53.3812	-42.5807	-33.6069	-34.8221	-29.9834	-42.7979
53.4138	-42.4837	-33.6088	-34.576	-29.9579	-42.4867
53.4465	-42.3891	-33.6113	-34.3329	-29.9317	-42.179
53.4791	-42.2967	-33.6144	-34.093	-29.9045	-41.875
53.5117	-42.2064	-33.6179	-33.8565	-29.8765	-41.5747
53.5444	-42.1182	-33.6216	-33.6233	-29.8478	-41.2781
53.577	-42.032	-33.6254	-33.3938	-29.8182	-40.9854
53.6097	-41.9477	-33.6293	-33.1679	-29.7878	-40.6965
53.6423	-41.8652	-33.6331	-32.9457	-29.7568	-40.4116
53.6749	-41.7845	-33.6367	-32.7274	-29.7251	-40.1306
53.7076	-41.7055	-33.64	-32.513	-29.6928	-39.8537
53.7402	-41.6282	-33.6429	-32.3026	-29.6599	-39.5809
53.7728	-41.5524	-33.6453	-32.0963	-29.6266	-39.3122
53.8055	-41.4783	-33.647	-31.8939	-29.5929	-39.0478
53.8381	-41.4056	-33.648	-31.6957	-29.5588	-38.7877
53.8708	-41.3345	-33.6483	-31.5016	-29.5244	-38.5319
53.9034	-41.2649	-33.6476	-31.3115	-29.4898	-38.2806
53.936	-41.1967	-33.6461	-31.1255	-29.455	-38.0337
53.9687	-41.1299	-33.6435	-30.9436	-29.4201	-37.7913
54.0013	-41.0645	-33.6399	-30.7658	-29.3852	-37.5536
54.0339	-41.0005	-33.6351	-30.5919	-29.3502	-37.3205
54.0666	-40.938	-33.6292	-30.422	-29.3152	-37.0921
54.0992	-40.8768	-33.6221	-30.2561	-29.2803	-36.8685
54.1319	-40.8171	-33.6138	-30.0941	-29.2455	-36.6497
54.1645	-40.7587	-33.6042	-29.9359	-29.2109	-36.4358
54.1971	-40.7018	-33.5933	-29.7814	-29.1763	-36.2268
54.2298	-40.6464	-33.5813	-29.6308	-29.142	-36.0227
54.2624	-40.5923	-33.5679	-29.4838	-29.1078	-35.8237
54.295	-40.5398	-33.5534	-29.3404	-29.0739	-35.6296
54.3277	-40.4888	-33.5377	-29.2006	-29.0402	-35.4406
54.3603	-40.4393	-33.5208	-29.0644	-29.0066	-35.2567
54.393	-40.3914	-33.5028	-28.9316	-28.9734	-35.0778
54.4256	-40.3451	-33.4838	-28.8022	-28.9404	-34.904
54.4582	-40.3005	-33.4638	-28.6761	-28.9076	-34.7352
54.4909	-40.2575	-33.4429	-28.5534	-28.8751	-34.5715
54.5235	-40.2163	-33.421	-28.4339	-28.8429	-34.4129
54.5561	-40.1768	-33.3984	-28.3177	-28.811	-34.2592
54.5888	-40.139	-33.3749	-28.2045	-28.7794	-34.1104
54.6214	-40.1031	-33.3507	-28.0944	-28.7482	-33.9666
54.654	-40.0691	-33.3259	-27.9874	-28.7173	-33.8276
54.6867	-40.0369	-33.3005	-27.8833	-28.6868	-33.6933
54.7193	-40.0067	-33.2745	-27.7821	-28.6568	-33.5638
54.752	-39.9784	-33.248	-27.6838	-28.6272	-33.4389
54.7846	-39.952	-33.2211	-27.5883	-28.5981	-33.3185
54.8172	-39.9276	-33.1938	-27.4956	-28.5695	-33.2027
54.8499	-39.9053	-33.1662	-27.4055	-28.5414	-33.0911
54.8825	-39.8849	-33.1383	-27.3182	-28.5139	-32.9839
54.9151	-39.8665	-33.1102	-27.2334	-28.4868	-32.8808
54.9478	-39.8501	-33.082	-27.1511	-28.4604	-32.7818
54.9804	-39.8357	-33.0537	-27.0714	-28.4344	-32.6867
55.0131	-39.8233	-33.0253	-26.9942	-28.4091	-32.5955
55.0457	-39.8129	-32.997	-26.9194	-28.3843	-32.5079
55.0783	-39.8043	-32.9687	-26.847	-28.3601	-32.424
55.111	-39.7977	-32.9405	-26.777	-28.3364	-32.3436
55.1436	-39.7929	-32.9126	-26.7093	-28.3134	-32.2665
55.1762	-39.79	-32.8848	-26.6439	-28.2909	-32.1926
55.2089	-39.7888	-32.8574	-26.5808	-28.2691	-32.1218
55.2415	-39.7893	-32.8303	-26.52	-28.2479	-32.054
55.2742	-39.7916	-32.8036	-26.4615	-28.2274	-31.989
55.3068	-39.7954	-32.7773	-26.4051	-28.2075	-31.9269
55.3394	-39.8007	-32.7516	-26.351	-28.1884	-31.8674
55.3721	-39.8076	-32.7263	-26.2991	-28.1701	-31.8104
55.4047	-39.8158	-32.7016	-26.2494	-28.1525	-31.7558
55.4373	-39.8253	-32.6775	-26.2018	-28.1359	-31.7036
55.47	-39.8362	-32.654	-26.1565	-28.1202	-31.6535
55.5026	-39.8481	-32.6311	-26.1132	-28.1056	-31.6056
55.5352	-39.8612	-32.6088	-26.072	-28.092	-31.5598
55.5679	-39.8752	-32.5872	-26.0329	-28.0796	-31.5158
55.6005	-39.8902	-32.5662	-25.9959	-28.0684	-31.4738
55.6332	-39.9059	-32.5459	-25.9609	-28.0585	-31.4335
55.6658	-39.9224	-32.5262	-25.9278	-28.0501	-31.3949
55.6984	-39.9395	-32.5071	-25.8965	-28.0431	-31.358
55.7311	-39.9571	-32.4886	-25.8672	-28.0377	-31.3227
55.7637	-39.9752	-32.4708	-25.8396	-28.0339	-31.2889
55.7963	-39.9937	-32.4535	-25.8137	-28.0319	-31.2566
55.829	-40.0124	-32.4367	-25.7894	-28.0316	-31.2258
55.8616	-40.0313	-32.4205	-25.7666	-28.0331	-31.1963
55.8943	-40.0503	-32.4048	-25.7453	-28.0365	-31.1683
55.9269	-40.0694	-32.3896	-25.7254	-28.0419	-31.1415
55.9595	-40.0885	-32.3748	-25.7067	-28.0492	-31.1162
55.9922	-40.1074	-32.3604	-25.6892	-28.0585	-31.0921
56.0248	-40.1263	-32.3464	-25.6726	-28.0699	-31.0693
56.0574	-40.145	-32.3328	-25.657	-28.0834	-31.0478
56.0901	-40.1634	-32.3194	-25.6423	-28.0989	-31.0275
56.1227	-40.1816	-32.3064	-25.6282	-28.1166	-31.0086
56.1554	-40.1995	-32.2935	-25.6146	-28.1362	-30.9908
56.188	-40.2171	-32.281	-25.6016	-28.158	-30.9744
56.2206	-40.2344	-32.2686	-25.5888	-28.1818	-30.9592
56.2533	-40.2512	-32.2565	-25.5763	-28.2076	-30.9453
56.2859	-40.2677	-32.2445	-25.5639	-28.2353	-30.9326
56.3185	-40.2839	-32.2328	-25.5515	-28.265	-30.9212
56.3512	-40.2996	-32.2213	-25.5391	-28.2965	-30.911
56.3838	-40.315	-32.21	-25.5264	-28.3297	-30.9022
56.4164	-40.3301	-32.1989	-25.5135	-28.3648	-30.8945
56.4491	-40.3448	-32.1881	-25.5003	-28.4014	-30.8881
56.4817	-40.3592	-32.1775	-25.4866	-28.4396	-30.883
56.5144	-40.3733	-32.1672	-25.4725	-28.4793	-30.8791
56.547	-40.3871	-32.1572	-25.4579	-28.5204	-30.8764
56.5796	-40.4006	-32.1475	-25.4428	-28.5628	-30.8749
56.6123	-40.414	-32.1381	-25.427	-28.6065	-30.8745
56.6449	-40.4272	-32.1291	-25.4107	-28.6513	-30.8753
56.6775	-40.4402	-32.1204	-25.3937	-28.6971	-30.8772
56.7102	-40.4532	-32.112	-25.376	-28.744	-30.8802
56.7428	-40.466	-32.104	-25.3577	-28.7917	-30.8842
56.7755	-40.4789	-32.0964	-25.3387	-28.8402	-30.8892
56.8081	-40.4918	-32.0891	-25.3191	-28.8894	-30.895
56.8407	-40.5047	-32.0823	-25.2988	-28.9392	-30.9018
56.8734	-40.5178	-32.0758	-25.2778	-28.9895	-30.9093
56.906	-40.5309	-32.0697	-25.2563	-29.0402	-30.9176
56.9386	-40.5442	-32.064	-25.2342	-29.0912	-30.9265
56.9713	-40.5577	-32.0587	-25.2116	-29.1424	-30.936
57.0039	-40.5713	-32.0537	-25.1884	-29.1938	-30.946
57.0366	-40.5852	-32.049	-25.1648	-29.2452	-30.9565
57.0692	-40.5993	-32.0447	-25.1408	-29.2965	-30.9674
57.1018	-40.6137	-32.0406	-25.1164	-29.3477	-30.9785
57.1345	-40.6283	-32.0368	-25.0918	-29.3986	-30.9898
57.1671	-40.6431	-32.0333	-25.0669	-29.4492	-31.0013
57.1997	-40.6583	-32.0301	-25.0418	-29.4994	-31.0129
57.2324	-40.6737	-32.027	-25.0166	-29.549	-31.0245
57.265	-40.6894	-32.0242	-24.9913	-29.5981	-31.0361
57.2977	-40.7053	-32.0215	-24.9661	-29.6465	-31.0477
57.3303	-40.7216	-32.0191	-24.941	-29.6941	-31.0591
57.3629	-40.7381	-32.0168	-24.916	-29.7409	-31.0703
57.3956	-40.7548	-32.0146	-24.8913	-29.7869	-31.0813
57.4282	-40.7719	-32.0125	-24.8669	-29.8318	-31.0921
57.4608	-40.7892	-32.0105	-24.843	-29.8758	-31.1026
57.4935	-40.8067	-32.0085	-24.8194	-29.9187	-31.1128
57.5261	-40.8244	-32.0066	-24.7964	-29.9605	-31.1227
57.5587	-40.8423	-32.0046	-24.774	-30.0011	-31.1323
57.5914	-40.8604	-32.0027	-24.7523	-30.0406	-31.1415
57.624	-40.8786	-32.0007	-24.7312	-30.0788	-31.1504
57.6567	-40.8969	-31.9986	-24.7109	-30.1158	-31.1589
57.6893	-40.9152	-31.9964	-24.6915	-30.1515	-31.1671
57.7219	-40.9336	-31.9941	-24.6729	-30.1859	-31.1749
57.7546	-40.9519	-31.9916	-24.6552	-30.2191	-31.1825
57.7872	-40.9702	-31.9889	-24.6384	-30.2509	-31.1896
57.8198	-40.9883	-31.9859	-24.6226	-30.2815	-31.1965
57.8525	-41.0062	-31.9827	-24.6078	-30.3107	-31.2031
57.8851	-41.024	-31.9791	-24.594	-30.3388	-31.2094
57.9178	-41.0414	-31.9752	-24.5812	-30.3655	-31.2154
57.9504	-41.0586	-31.9709	-24.5695	-30.3911	-31.2211
57.983	-41.0755	-31.9661	-24.5588	-30.4155	-31.2265
58.0157	-41.0919	-31.9609	-24.5491	-30.4387	-31.2317
58.0483	-41.108	-31.9551	-24.5404	-30.4608	-31.2367
58.0809	-41.1236	-31.9487	-24.5327	-30.4818	-31.2415
58.1136	-41.1388	-31.9417	-24.5259	-30.5018	-31.2461
58.1462	-41.1535	-31.9341	-24.5201	-30.5207	-31.2506
58.1789	-41.1677	-31.9258	-24.5153	-30.5387	-31.2549
58.2115	-41.1814	-31.9168	-24.5112	-30.5558	-31.259
58.2441	-41.1945	-31.907	-24.508	-30.5719	-31.2631
58.2768	-41.2071	-31.8965	-24.5055	-30.5872	-31.267
58.3094	-41.2191	-31.8853	-24.5037	-30.6016	-31.2709
58.342	-41.2306	-31.8732	-24.5026	-30.6152	-31.2748
58.3747	-41.2415	-31.8604	-24.5021	-30.628	-31.2787
58.4073	-41.2519	-31.8469	-24.5022	-30.64	-31.2825
58.4399	-41.2616	-31.8326	-24.5027	-30.6512	-31.2864
58.4726	-41.2708	-31.8176	-24.5038	-30.6616	-31.2904
58.5052	-41.2794	-31.8018	-24.5052	-30.6713	-31.2945
58.5379	-41.2875	-31.7854	-24.507	-30.6803	-31.2987
58.5705	-41.295	-31.7683	-24.5091	-30.6884	-31.3031
58.6031	-41.3019	-31.7506	-24.5115	-30.6958	-31.3076
58.6358	-41.3082	-31.7324	-24.5141	-30.7024	-31.3124
58.6684	-41.3141	-31.7136	-24.517	-30.7083	-31.3174
58.701	-41.3194	-31.6943	-24.52	-30.7133	-31.3227
58.7337	-41.3242	-31.6746	-24.5233	-30.7174	-31.3283
58.7663	-41.3285	-31.6546	-24.5267	-30.7207	-31.3341
58.799	-41.3324	-31.6343	-24.5302	-30.7231	-31.3402
58.8316	-41.3358	-31.6138	-24.5339	-30.7247	-31.3466
58.8642	-41.3388	-31.5932	-24.5378	-30.7253	-31.3533
58.8969	-41.3415	-31.5725	-24.5417	-30.7249	-31.3603
58.9295	-41.3438	-31.5518	-24.5458	-30.7236	-31.3674
58.9621	-41.3459	-31.5313	-24.5501	-30.7214	-31.3749
58.9948	-41.3476	-31.5109	-24.5545	-30.7182	-31.3825
59.0274	-41.3492	-31.4908	-24.559	-30.7139	-31.3902
59.0601	-41.3506	-31.4711	-24.5637	-30.7088	-31.3981
59.0927	-41.3518	-31.4518	-24.5686	-30.7026	-31.4061
59.1253	-41.3529	-31.433	-24.5737	-30.6954	-31.4141
59.158	-41.354	-31.4147	-24.579	-30.6873	-31.4221
59.1906	-41.355	-31.3972	-24.5845	-30.6782	-31.4301
59.2232	-41.3561	-31.3804	-24.5902	-30.6682	-31.4379
59.2559	-41.3573	-31.3644	-24.5962	-30.6573	-31.4457
59.2885	-41.3586	-31.3492	-24.6024	-30.6454	-31.4532
59.3211	-41.36	-31.335	-24.6088	-30.6327	-31.4606
59.3538	-41.3616	-31.3217	-24.6154	-30.6191	-31.4676
59.3864	-41.3634	-31.3093	-24.6223	-30.6046	-31.4744
59.4191	-41.3654	-31.298	-24.6295	-30.5894	-31.4809
59.4517	-41.3676	-31.2878	-24.6369	-30.5733	-31.487
59.4843	-41.3702	-31.2785	-24.6445	-30.5565	-31.4928
59.517	-41.3729	-31.2704	-24.6523	-30.5389	-31.4981
59.5496	-41.376	-31.2634	-24.6603	-30.5206	-31.503
59.5822	-41.3793	-31.2575	-24.6686	-30.5016	-31.5075
59.6149	-41.3829	-31.2527	-24.6771	-30.4819	-31.5114
59.6475	-41.3867	-31.249	-24.6858	-30.4616	-31.515
59.6802	-41.3908	-31.2464	-24.6947	-30.4406	-31.518
59.7128	-41.395	-31.2449	-24.7039	-30.4191	-31.5205
59.7454	-41.3995	-31.2445	-24.7132	-30.397	-31.5225
59.7781	-41.4041	-31.2451	-24.7228	-30.3744	-31.5241
59.8107	-41.4088	-31.2468	-24.7326	-30.3513	-31.5251
59.8433	-41.4136	-31.2494	-24.7426	-30.3277	-31.5255
59.876	-41.4184	-31.253	-24.7528	-30.3038	-31.5255
59.9086	-41.4232	-31.2576	-24.7633	-30.2795	-31.5249
59.9413	-41.428	-31.263	-24.774	-30.255	-31.5238
59.9739	-41.4327	-31.2692	-24.7849	-30.2303	-31.5221
60.0065	-41.4372	-31.2762	-24.796	-30.2054	-31.5199
60.0392	-41.4415	-31.284	-24.8074	-30.1803	-31.5172
60.0718	-41.4456	-31.2924	-24.819	-30.1553	-31.5139
60.1044	-41.4495	-31.3016	-24.8308	-30.1303	-31.5101
60.1371	-41.453	-31.3113	-24.8428	-30.1054	-31.5057
60.1697	-41.4562	-31.3217	-24.855	-30.0806	-31.5009
60.2023	-41.459	-31.3326	-24.8673	-30.056	-31.4955
60.235	-41.4614	-31.3441	-24.8799	-30.0317	-31.4896
60.2676	-41.4634	-31.356	-24.8925	-30.0078	-31.4833
60.3003	-41.4649	-31.3685	-24.9053	-29.9842	-31.4765
60.3329	-41.466	-31.3814	-24.9181	-29.9611	-31.4692
60.3655	-41.4665	-31.3948	-24.931	-29.9384	-31.4615
60.3982	-41.4666	-31.4087	-24.9439	-29.9163	-31.4534
60.4308	-41.4662	-31.423	-24.9567	-29.8947	-31.4449
60.4634	-41.4652	-31.4377	-24.9695	-29.8738	-31.4361
60.4961	-41.4637	-31.4528	-24.9823	-29.8534	-31.4269
60.5287	-41.4617	-31.4684	-24.9948	-29.8338	-31.4175
60.5614	-41.4592	-31.4845	-25.0073	-29.8148	-31.4078
60.594	-41.4562	-31.5009	-25.0195	-29.7965	-31.3979
60.6266	-41.4527	-31.5178	-25.0315	-29.7789	-31.3878
60.6593	-41.4487	-31.5351	-25.0433	-29.7621	-31.3776
60.6919	-41.4443	-31.5529	-25.0548	-29.7459	-31.3673
60.7245	-41.4394	-31.5711	-25.0659	-29.7305	-31.3569
60.7572	-41.4341	-31.5898	-25.0768	-29.7157	-31.3465
60.7898	-41.4285	-31.609	-25.0872	-29.7016	-31.3361
60.8225	-41.4225	-31.6286	-25.0973	-29.6882	-31.3257
60.8551	-41.4161	-31.6488	-25.1071	-29.6754	-31.3154
60.8877	-41.4095	-31.6695	-25.1164	-29.6632	-31.3052
60.9204	-41.4027	-31.6908	-25.1253	-29.6517	-31.2951
60.953	-41.3956	-31.7126	-25.1337	-29.6407	-31.2851
60.9856	-41.3883	-31.735	-25.1417	-29.6303	-31.2753
61.0183	-41.381	-31.758	-25.1493	-29.6204	-31.2657
61.0509	-41.3735	-31.7817	-25.1564	-29.6111	-31.2562
61.0836	-41.366	-31.806	-25.163	-29.6023	-31.2468
61.1162	-41.3584	-31.831	-25.1691	-29.5939	-31.2377
61.1488	-41.3509	-31.8567	-25.1748	-29.586	-31.2287
61.1815	-41.3434	-31.8831	-25.18	-29.5786	-31.2199
61.2141	-41.336	-31.9102	-25.1847	-29.5715	-31.2112
61.2467	-41.3286	-31.9381	-25.1889	-29.5649	-31.2027
61.2794	-41.3214	-31.9667	-25.1926	-29.5586	-31.1943
61.312	-41.3144	-31.996	-25.1958	-29.5527	-31.186
61.3446	-41.3075	-32.0261	-25.1986	-29.5471	-31.1779
61.3773	-41.3008	-32.0568	-25.2008	-29.5417	-31.17
61.4099	-41.2942	-32.0882	-25.2026	-29.5367	-31.1621
61.4426	-41.2879	-32.1202	-25.2038	-29.5319	-31.1544
61.4752	-41.2818	-32.1528	-25.2046	-29.5273	-31.1467
61.5078	-41.2759	-32.1859	-25.2048	-29.5228	-31.1392
61.5405	-41.2702	-32.2195	-25.2046	-29.5185	-31.1319
61.5731	-41.2648	-32.2536	-25.2038	-29.5143	-31.1246
61.6057	-41.2596	-32.288	-25.2026	-29.5102	-31.1175
61.6384	-41.2547	-32.3227	-25.2009	-29.5061	-31.1105
61.671	-41.2501	-32.3576	-25.1986	-29.5019	-31.1037
61.7037	-41.2457	-32.3926	-25.1959	-29.4978	-31.097
61.7363	-41.2415	-32.4277	-25.1928	-29.4935	-31.0906
61.7689	-41.2376	-32.4627	-25.1892	-29.4891	-31.0844
61.8016	-41.234	-32.4976	-25.1853	-29.4845	-31.0784
61.8342	-41.2306	-32.5322	-25.1809	-29.4798	-31.0727
61.8668	-41.2275	-32.5664	-25.1762	-29.4748	-31.0672
61.8995	-41.2246	-32.6002	-25.1711	-29.4695	-31.0621
61.9321	-41.2219	-32.6335	-25.1658	-29.4638	-31.0573
61.9648	-41.2195	-32.666	-25.1602	-29.4579	-31.0528
61.9974	-41.2173	-32.6979	-25.1544	-29.4516	-31.0486
62.03	-41.2152	-32.7288	-25.1484	-29.4448	-31.0449
62.0627	-41.2134	-32.7588	-25.1422	-29.4377	-31.0415
62.0953	-41.2117	-32.7878	-25.136	-29.4301	-31.0385
62.1279	-41.2101	-32.8157	-25.1297	-29.4221	-31.0359
62.1606	-41.2086	-32.8425	-25.1233	-29.4136	-31.0338
62.1932	-41.2072	-32.868	-25.117	-29.4047	-31.0321
62.2258	-41.2059	-32.8922	-25.1107	-29.3953	-31.0308
62.2585	-41.2047	-32.9151	-25.1045	-29.3855	-31.0299
62.2911	-41.2035	-32.9366	-25.0984	-29.3753	-31.0295
62.3238	-41.2022	-32.9566	-25.0924	-29.3646	-31.0296
62.3564	-41.201	-32.9752	-25.0866	-29.3536	-31.03
62.389	-41.1997	-32.9923	-25.0809	-29.3421	-31.0309
62.4217	-41.1984	-33.0079	-25.0755	-29.3304	-31.0321
62.4543	-41.197	-33.0219	-25.0704	-29.3183	-31.0338
62.4869	-41.1955	-33.0345	-25.0655	-29.3059	-31.0358
62.5196	-41.1939	-33.0454	-25.0609	-29.2933	-31.0381
62.5522	-41.1923	-33.0549	-25.0566	-29.2805	-31.0408
62.5849	-41.1905	-33.0628	-25.0527	-29.2675	-31.0438
62.6175	-41.1887	-33.0692	-25.049	-29.2545	-31.047
62.6501	-41.1868	-33.074	-25.0458	-29.2413	-31.0506
62.6828	-41.1848	-33.0774	-25.0429	-29.2282	-31.0543
62.7154	-41.1828	-33.0794	-25.0405	-29.2151	-31.0583
62.748	-41.1807	-33.0799	-25.0384	-29.2021	-31.0625
62.7807	-41.1785	-33.079	-25.0367	-29.1892	-31.0668
62.8133	-41.1763	-33.0768	-25.0354	-29.1765	-31.0712
62.846	-41.174	-33.0734	-25.0345	-29.164	-31.0757
62.8786	-41.1717	-33.0687	-25.0339	-29.1518	-31.0803
62.9112	-41.1694	-33.0628	-25.0338	-29.1399	-31.0849
62.9439	-41.167	-33.0559	-25.034	-29.1284	-31.0895
62.9765	-41.1646	-33.0478	-25.0345	-29.1173	-31.094
63.0091	-41.1621	-33.0388	-25.0353	-29.1066	-31.0984
63.0418	-41.1595	-33.0288	-25.0364	-29.0965	-31.1027
63.0744	-41.1569	-33.0179	-25.0379	-29.0868	-31.1069
63.107	-41.1542	-33.0062	-25.0395	-29.0778	-31.1108
63.1397	-41.1514	-32.9937	-25.0414	-29.0693	-31.1145
63.1723	-41.1485	-32.9805	-25.0434	-29.0615	-31.1179
63.205	-41.1454	-32.9666	-25.0456	-29.0544	-31.121
63.2376	-41.1423	-32.9521	-25.048	-29.0479	-31.1237
63.2702	-41.1389	-32.9371	-25.0505	-29.0421	-31.126
63.3029	-41.1354	-32.9216	-25.0531	-29.037	-31.1279
63.3355	-41.1317	-32.9056	-25.0557	-29.0326	-31.1293
63.3681	-41.1278	-32.8892	-25.0584	-29.029	-31.1302
63.4008	-41.1236	-32.8725	-25.0612	-29.0262	-31.1305
63.4334	-41.1192	-32.8554	-25.0639	-29.0241	-31.1302
63.4661	-41.1146	-32.8381	-25.0667	-29.0228	-31.1293
63.4987	-41.1098	-32.8206	-25.0694	-29.0223	-31.1278
63.5313	-41.1047	-32.8028	-25.072	-29.0227	-31.1256
63.564	-41.0994	-32.7849	-25.0745	-29.0238	-31.1226
63.5966	-41.0939	-32.7668	-25.0769	-29.0258	-31.1189
63.6292	-41.0882	-32.7487	-25.0792	-29.0286	-31.1145
63.6619	-41.0823	-32.7304	-25.0813	-29.0322	-31.1093
63.6945	-41.0762	-32.7121	-25.0831	-29.0367	-31.1034
63.7272	-41.0699	-32.6938	-25.0847	-29.042	-31.0966
63.7598	-41.0635	-32.6754	-25.0861	-29.0481	-31.0891
63.7924	-41.057	-32.657	-25.0872	-29.0551	-31.0808
63.8251	-41.0503	-32.6385	-25.0879	-29.0629	-31.0717
63.8577	-41.0435	-32.62	-25.0883	-29.0714	-31.0618
63.8903	-41.0366	-32.6013	-25.0883	-29.0807	-31.0511
63.923	-41.0295	-32.5825	-25.088	-29.0907	-31.0396
63.9556	-41.0224	-32.5636	-25.0872	-29.1014	-31.0274
63.9883	-41.0152	-32.5445	-25.086	-29.1127	-31.0144
64.0209	-41.008	-32.5251	-25.0844	-29.1246	-31.0007
64.0535	-41.0007	-32.5055	-25.0824	-29.1371	-30.9863
64.0862	-40.9933	-32.4856	-25.08	-29.1501	-30.9712
64.1188	-40.9859	-32.4654	-25.0772	-29.1635	-30.9554
64.1514	-40.9784	-32.4448	-25.0739	-29.1773	-30.9391
64.1841	-40.9709	-32.4238	-25.0703	-29.1915	-30.9221
64.2167	-40.9633	-32.4024	-25.0662	-29.206	-30.9047
64.2493	-40.9556	-32.3806	-25.0618	-29.2209	-30.8867
64.282	-40.9479	-32.3582	-25.0571	-29.2359	-30.8683
64.3146	-40.9401	-32.3354	-25.052	-29.2512	-30.8494
64.3473	-40.9322	-32.312	-25.0466	-29.2665	-30.8301
64.3799	-40.9241	-32.2881	-25.0409	-29.2821	-30.8105
64.4125	-40.916	-32.2637	-25.035	-29.2976	-30.7905
64.4452	-40.9078	-32.2387	-25.0289	-29.3132	-30.7703
64.4778	-40.8994	-32.2131	-25.0226	-29.3288	-30.7497
64.5104	-40.8909	-32.187	-25.0162	-29.3443	-30.7289
64.5431	-40.8823	-32.1603	-25.0097	-29.3597	-30.7079
64.5757	-40.8735	-32.1332	-25.0031	-29.375	-30.6868
64.6084	-40.8646	-32.1054	-24.9964	-29.3902	-30.6654
64.641	-40.8555	-32.0772	-24.9898	-29.4051	-30.644
64.6736	-40.8463	-32.0486	-24.9832	-29.4199	-30.6224
64.7063	-40.8369	-32.0195	-24.9767	-29.4344	-30.6008
64.7389	-40.8274	-31.99	-24.9702	-29.4486	-30.5791
64.7715	-40.8178	-31.9601	-24.9639	-29.4625	-30.5575
64.8042	-40.808	-31.93	-24.9578	-29.476	-30.5358
64.8368	-40.798	-31.8996	-24.9518	-29.4892	-30.5141
64.8695	-40.7879	-31.8691	-24.946	-29.502	-30.4925
64.9021	-40.7777	-31.8384	-24.9404	-29.5144	-30.471
64.9347	-40.7673	-31.8077	-24.935	-29.5263	-30.4495
64.9674	-40.7568	-31.777	-24.9298	-29.5378	-30.4281
65	-40.7461	-31.7464	-24.9249	-29.5488	-30.4069
65.0326	-40.7352	-31.7158	-24.9202	-29.5593	-30.3857
65.0653	-40.7242	-31.6855	-24.9157	-29.5693	-30.3647
65.0979	-40.713	-31.6554	-24.9115	-29.5788	-30.3438
65.1305	-40.7016	-31.6256	-24.9074	-29.5877	-30.323
65.1632	-40.69	-31.5961	-24.9036	-29.5961	-30.3023
65.1958	-40.6782	-31.567	-24.8999	-29.6039	-30.2818
65.2285	-40.6662	-31.5384	-24.8964	-29.6111	-30.2614
65.2611	-40.6539	-31.5102	-24.8931	-29.6177	-30.241
65.2937	-40.6414	-31.4825	-24.8899	-29.6237	-30.2208
65.3264	-40.6286	-31.4553	-24.8868	-29.6291	-30.2006
65.359	-40.6155	-31.4288	-24.8838	-29.6339	-30.1804
65.3916	-40.6021	-31.4028	-24.8809	-29.638	-30.1602
65.4243	-40.5885	-31.3775	-24.8781	-29.6416	-30.14
65.4569	-40.5745	-31.3529	-24.8753	-29.6445	-30.1198
65.4896	-40.5602	-31.329	-24.8726	-29.6467	-30.0995
65.5222	-40.5456	-31.3058	-24.8699	-29.6484	-30.0792
65.5548	-40.5306	-31.2833	-24.8671	-29.6495	-30.0587
65.5875	-40.5154	-31.2616	-24.8643	-29.6499	-30.0382
65.6201	-40.4999	-31.2407	-24.8614	-29.6498	-30.0175
65.6527	-40.484	-31.2205	-24.8584	-29.6491	-29.9966
65.6854	-40.4678	-31.2012	-24.8553	-29.6479	-29.9756
65.718	-40.4514	-31.1826	-24.852	-29.6461	-29.9544
65.7507	-40.4346	-31.1648	-24.8485	-29.6438	-29.933
65.7833	-40.4175	-31.1479	-24.8448	-29.641	-29.9114
65.8159	-40.4001	-31.1316	-24.8409	-29.6377	-29.8896
65.8486	-40.3824	-31.1162	-24.8366	-29.6339	-29.8676
65.8812	-40.3644	-31.1014	-24.8321	-29.6297	-29.8454
65.9138	-40.3461	-31.0873	-24.8272	-29.625	-29.823
65.9465	-40.3275	-31.0739	-24.822	-29.6199	-29.8003
65.9791	-40.3086	-31.0611	-24.8164	-29.6143	-29.7774
66.0117	-40.2895	-31.0488	-24.8104	-29.6083	-29.7543
66.0444	-40.27	-31.0371	-24.8039	-29.6019	-29.731
66.077	-40.2503	-31.0258	-24.7971	-29.595	-29.7075
66.1097	-40.2304	-31.0149	-24.7899	-29.5878	-29.6838
66.1423	-40.2102	-31.0043	-24.7822	-29.5801	-29.6601
66.1749	-40.1898	-30.9941	-24.7741	-29.5721	-29.6362
66.2076	-40.1692	-30.9841	-24.7657	-29.5637	-29.6122
66.2402	-40.1484	-30.9743	-24.7568	-29.5549	-29.5881
66.2728	-40.1274	-30.9646	-24.7475	-29.5458	-29.5641
66.3055	-40.1063	-30.955	-24.7379	-29.5363	-29.54
66.3381	-40.085	-30.9454	-24.728	-29.5265	-29.516
66.3708	-40.0636	-30.9359	-24.7177	-29.5164	-29.4921
66.4034	-40.0421	-30.9263	-24.7072	-29.5061	-29.4682
66.436	-40.0205	-30.9166	-24.6964	-29.4954	-29.4446
66.4687	-39.9988	-30.9068	-24.6855	-29.4845	-29.4211
66.5013	-39.9771	-30.8969	-24.6744	-29.4734	-29.3979
66.5339	-39.9554	-30.8869	-24.6632	-29.4621	-29.3749
66.5666	-39.9336	-30.8767	-24.6519	-29.4506	-29.3523
66.5992	-39.9119	-30.8663	-24.6406	-29.4389	-29.33
66.6319	-39.8903	-30.8558	-24.6294	-29.4271	-29.3082
66.6645	-39.8687	-30.8451	-24.6182	-29.4151	-29.2869
66.6971	-39.8472	-30.8342	-24.6071	-29.403	-29.2661
66.7298	-39.8258	-30.8232	-24.5963	-29.3908	-29.2459
66.7624	-39.8045	-30.8121	-24.5856	-29.3786	-29.2263
66.795	-39.7834	-30.8009	-24.5753	-29.3662	-29.2074
66.8277	-39.7624	-30.7896	-24.5652	-29.3539	-29.1892
66.8603	-39.7416	-30.7784	-24.5555	-29.3415	-29.1718
66.893	-39.721	-30.7671	-24.5461	-29.3291	-29.1553
66.9256	-39.7006	-30.7559	-24.5372	-29.3167	-29.1397
66.9582	-39.6804	-30.7448	-24.5287	-29.3045	-29.1249
66.9909	-39.6604	-30.7338	-24.5207	-29.2923	-29.1112
67.0235	-39.6407	-30.7229	-24.5132	-29.2802	-29.0985
67.0561	-39.6213	-30.7123	-24.5062	-29.2683	-29.0869
67.0888	-39.6021	-30.7019	-24.4997	-29.2565	-29.0763
67.1214	-39.5832	-30.6918	-24.4938	-29.245	-29.0669
67.154	-39.5646	-30.682	-24.4884	-29.2336	-29.0586
67.1867	-39.5463	-30.6725	-24.4835	-29.2225	-29.0514
67.2193	-39.5282	-30.6634	-24.4792	-29.2116	-29.0454
67.252	-39.5105	-30.6546	-24.4754	-29.2009	-29.0405
67.2846	-39.493	-30.6462	-24.4721	-29.1905	-29.0367
67.3172	-39.4757	-30.6381	-24.4694	-29.1803	-29.0341
67.3499	-39.4587	-30.6305	-24.4672	-29.1704	-29.0326
67.3825	-39.4419	-30.6233	-24.4654	-29.1608	-29.0322
67.4151	-39.4253	-30.6165	-24.4642	-29.1514	-29.0329
67.4478	-39.4089	-30.6101	-24.4633	-29.1423	-29.0345
67.4804	-39.3927	-30.6042	-24.4629	-29.1335	-29.0372
67.5131	-39.3766	-30.5986	-24.4628	-29.125	-29.0408
67.5457	-39.3606	-30.5935	-24.4631	-29.1167	-29.0453
67.5783	-39.3446	-30.5887	-24.4637	-29.1087	-29.0507
67.611	-39.3287	-30.5843	-24.4645	-29.1009	-29.0568
67.6436	-39.3128	-30.5803	-24.4656	-29.0934	-29.0637
67.6762	-39.2969	-30.5766	-24.4668	-29.0861	-29.0712
67.7089	-39.281	-30.5731	-24.4681	-29.0791	-29.0794
67.7415	-39.265	-30.5699	-24.4695	-29.0723	-29.0881
67.7742	-39.2489	-30.5669	-24.471	-29.0657	-29.0973
67.8068	-39.2327	-30.5641	-24.4724	-29.0593	-29.1069
67.8394	-39.2163	-30.5614	-24.4738	-29.0531	-29.1169
67.8721	-39.1999	-30.5587	-24.4751	-29.0471	-29.1271
67.9047	-39.1832	-30.5561	-24.4763	-29.0413	-29.1377
67.9373	-39.1665	-30.5534	-24.4773	-29.0357	-29.1484
67.97	-39.1496	-30.5506	-24.4782	-29.0303	-29.1592
68.0026	-39.1326	-30.5476	-24.4788	-29.025	-29.17
68.0352	-39.1154	-30.5444	-24.4791	-29.02	-29.1809
68.0679	-39.0981	-30.5409	-24.4791	-29.0151	-29.1917
68.1005	-39.0807	-30.5371	-24.4788	-29.0104	-29.2024
68.1332	-39.0633	-30.5328	-24.4782	-29.0059	-29.2129
68.1658	-39.0457	-30.528	-24.4772	-29.0016	-29.2232
68.1984	-39.0281	-30.5227	-24.4758	-28.9975	-29.2333
68.2311	-39.0105	-30.5167	-24.474	-28.9936	-29.243
68.2637	-38.9929	-30.5101	-24.4718	-28.9899	-29.2524
68.2963	-38.9752	-30.5026	-24.4691	-28.9866	-29.2614
68.329	-38.9576	-30.4943	-24.466	-28.9835	-29.2699
68.3616	-38.94	-30.485	-24.4625	-28.9807	-29.278
68.3943	-38.9225	-30.4748	-24.4585	-28.9782	-29.2855
68.4269	-38.905	-30.4635	-24.454	-28.9761	-29.2926
68.4595	-38.8877	-30.4511	-24.4491	-28.9743	-29.299
68.4922	-38.8704	-30.4375	-24.4437	-28.973	-29.3049
68.5248	-38.8532	-30.4227	-24.4379	-28.972	-29.3102
68.5574	-38.8362	-30.4067	-24.4317	-28.9715	-29.3149
68.5901	-38.8192	-30.3893	-24.4251	-28.9714	-29.3189
68.6227	-38.8024	-30.3707	-24.4181	-28.9717	-29.3223
68.6554	-38.7858	-30.3506	-24.4108	-28.9725	-29.325
68.688	-38.7693	-30.3292	-24.4032	-28.9738	-29.327
68.7206	-38.7529	-30.3065	-24.3954	-28.9757	-29.3284
68.7533	-38.7366	-30.2823	-24.3873	-28.978	-29.3291
68.7859	-38.7205	-30.2568	-24.379	-28.9809	-29.3293
68.8185	-38.7044	-30.2299	-24.3706	-28.9843	-29.3288
68.8512	-38.6885	-30.2016	-24.362	-28.9883	-29.3277
68.8838	-38.6727	-30.172	-24.3534	-28.993	-29.326
68.9164	-38.657	-30.1411	-24.3447	-28.9982	-29.3238
68.9491	-38.6413	-30.1089	-24.336	-29.0041	-29.321
68.9817	-38.6258	-30.0755	-24.3273	-29.0106	-29.3178
69.0144	-38.6102	-30.0409	-24.3186	-29.0178	-29.3141
69.047	-38.5948	-30.0052	-24.31	-29.0257	-29.31
69.0796	-38.5793	-29.9684	-24.3015	-29.0342	-29.3055
69.1123	-38.5639	-29.9306	-24.2931	-29.0433	-29.3006
69.1449	-38.5485	-29.8918	-24.2848	-29.0531	-29.2954
69.1775	-38.5331	-29.8522	-24.2766	-29.0634	-29.2899
69.2102	-38.5176	-29.8117	-24.2686	-29.0743	-29.2841
69.2428	-38.5022	-29.7706	-24.2607	-29.0858	-29.2781
69.2755	-38.4867	-29.7287	-24.253	-29.0977	-29.2718
69.3081	-38.4711	-29.6863	-24.2454	-29.11	-29.2653
69.3407	-38.4555	-29.6434	-24.238	-29.1226	-29.2586
69.3734	-38.4398	-29.6001	-24.2307	-29.1356	-29.2517
69.406	-38.4239	-29.5566	-24.2235	-29.1487	-29.2447
69.4386	-38.408	-29.5128	-24.2164	-29.1621	-29.2376
69.4713	-38.3918	-29.4689	-24.2095	-29.1754	-29.2303
69.5039	-38.3756	-29.4251	-24.2026	-29.1888	-29.2229
69.5366	-38.3591	-29.3813	-24.1958	-29.2022	-29.2155
69.5692	-38.3424	-29.3378	-24.189	-29.2153	-29.2079
69.6018	-38.3254	-29.2945	-24.1822	-29.2283	-29.2002
69.6345	-38.3083	-29.2517	-24.1754	-29.2409	-29.1923
69.6671	-38.2908	-29.2094	-24.1686	-29.2532	-29.1844
69.6997	-38.2731	-29.1677	-24.1617	-29.2651	-29.1763
69.7324	-38.2551	-29.1267	-24.1547	-29.2764	-29.168
69.765	-38.2368	-29.0864	-24.1476	-29.2871	-29.1595
69.7977	-38.2182	-29.047	-24.1403	-29.2972	-29.1507
69.8303	-38.1993	-29.0086	-24.1328	-29.3065	-29.1418
69.8629	-38.1801	-28.9711	-24.1251	-29.3151	-29.1325
69.8956	-38.1606	-28.9347	-24.1171	-29.3228	-29.123
69.9282	-38.1408	-28.8995	-24.1089	-29.3297	-29.1131
69.9608	-38.1206	-28.8654	-24.1003	-29.3356	-29.1028
69.9935	-38.1002	-28.8326	-24.0914	-29.3406	-29.0921
70.0261	-38.0795	-28.8011	-24.0822	-29.3445	-29.081
70.0587	-38.0585	-28.7708	-24.0727	-29.3474	-29.0693
70.0914	-38.0373	-28.7419	-24.0627	-29.3492	-29.0571
70.124	-38.0158	-28.7143	-24.0523	-29.35	-29.0444
70.1567	-37.9941	-28.6882	-24.0416	-29.3496	-29.031
70.1893	-37.9722	-28.6634	-24.0304	-29.3482	-29.017
70.2219	-37.9501	-28.6399	-24.0189	-29.3456	-29.0024
70.2546	-37.9279	-28.6179	-24.0068	-29.342	-28.987
70.2872	-37.9056	-28.5972	-23.9944	-29.3372	-28.9709
70.3198	-37.8833	-28.5778	-23.9815	-29.3315	-28.9539
70.3525	-37.8608	-28.5597	-23.9682	-29.3247	-28.9362
70.3851	-37.8383	-28.5429	-23.9544	-29.3169	-28.9177
70.4178	-37.8159	-28.5273	-23.9402	-29.3081	-28.8983
70.4504	-37.7934	-28.5128	-23.9256	-29.2985	-28.878
70.483	-37.771	-28.4995	-23.9105	-29.2879	-28.8568
70.5157	-37.7486	-28.4872	-23.8951	-29.2766	-28.8347
70.5483	-37.7264	-28.4759	-23.8792	-29.2645	-28.8116
70.5809	-37.7041	-28.4656	-23.863	-29.2517	-28.7875
70.6136	-37.682	-28.4563	-23.8464	-29.2383	-28.7625
70.6462	-37.6599	-28.4477	-23.8295	-29.2242	-28.7365
70.6789	-37.638	-28.44	-23.8124	-29.2097	-28.7095
70.7115	-37.6161	-28.4331	-23.7949	-29.1947	-28.6815
70.7441	-37.5943	-28.4268	-23.7772	-29.1794	-28.6526
70.7768	-37.5727	-28.4212	-23.7593	-29.1637	-28.6226
70.8094	-37.5511	-28.4163	-23.7413	-29.1478	-28.5918
70.842	-37.5297	-28.4119	-23.7231	-29.1318	-28.5599
70.8747	-37.5083	-28.408	-23.7048	-29.1156	-28.5272
70.9073	-37.4872	-28.4047	-23.6864	-29.0994	-28.4937
70.9399	-37.4661	-28.4018	-23.668	-29.0833	-28.4592
70.9726	-37.4452	-28.3993	-23.6495	-29.0672	-28.424
71.0052	-37.4244	-28.3973	-23.6311	-29.0513	-28.388
71.0379	-37.4037	-28.3956	-23.6127	-29.0356	-28.3514
71.0705	-37.3832	-28.3943	-23.5944	-29.0201	-28.314
71.1031	-37.3629	-28.3934	-23.5762	-29.0048	-28.2761
71.1358	-37.3427	-28.3927	-23.5581	-28.9899	-28.2376
71.1684	-37.3227	-28.3924	-23.5402	-28.9753	-28.1986
71.201	-37.3029	-28.3923	-23.5224	-28.961	-28.1591
71.2337	-37.2833	-28.3926	-23.5048	-28.9471	-28.1192
71.2663	-37.2638	-28.393	-23.4875	-28.9335	-28.079
71.299	-37.2446	-28.3938	-23.4703	-28.9203	-28.0385
71.3316	-37.2257	-28.3947	-23.4533	-28.9073	-27.9978
71.3642	-37.2069	-28.3959	-23.4366	-28.8947	-27.9569
71.3969	-37.1884	-28.3973	-23.4201	-28.8824	-27.9159
71.4295	-37.1701	-28.3989	-23.4039	-28.8702	-27.8748
71.4621	-37.152	-28.4007	-23.3879	-28.8583	-27.8337
71.4948	-37.1342	-28.4027	-23.3722	-28.8466	-27.7927
71.5274	-37.1166	-28.4049	-23.3567	-28.835	-27.7518
71.5601	-37.0992	-28.4073	-23.3414	-28.8235	-27.7111
71.5927	-37.0821	-28.4099	-23.3264	-28.812	-27.6705
71.6253	-37.0651	-28.4128	-23.3116	-28.8005	-27.6302
71.658	-37.0484	-28.4159	-23.297	-28.7889	-27.5902
71.6906	-37.0319	-28.4192	-23.2826	-28.7772	-27.5505
71.7232	-37.0155	-28.4227	-23.2685	-28.7654	-27.5112
71.7559	-36.9993	-28.4265	-23.2545	-28.7533	-27.4723
71.7885	-36.9833	-28.4305	-23.2407	-28.7409	-27.4338
71.8211	-36.9675	-28.4346	-23.227	-28.7281	-27.3957
71.8538	-36.9518	-28.439	-23.2135	-28.7149	-27.3581
71.8864	-36.9362	-28.4435	-23.2001	-28.7012	-27.3209
71.9191	-36.9208	-28.4482	-23.1868	-28.6869	-27.2843
71.9517	-36.9055	-28.4531	-23.1736	-28.6721	-27.2481
71.9843	-36.8904	-28.458	-23.1604	-28.6565	-27.2124
72.017	-36.8753	-28.463	-23.1473	-28.6402	-27.1771
72.0496	-36.8603	-28.468	-23.1343	-28.6232	-27.1424
72.0822	-36.8454	-28.4731	-23.1212	-28.6053	-27.1081
72.1149	-36.8305	-28.4781	-23.1081	-28.5866	-27.0744
72.1475	-36.8157	-28.4831	-23.095	-28.5669	-27.041
72.1802	-36.801	-28.488	-23.0819	-28.5464	-27.0082
72.2128	-36.7863	-28.4928	-23.0687	-28.5249	-26.9757
72.2454	-36.7717	-28.4974	-23.0554	-28.5024	-26.9437
72.2781	-36.7571	-28.5018	-23.0421	-28.479	-26.9121
72.3107	-36.7425	-28.5059	-23.0286	-28.4545	-26.8808
72.3433	-36.728	-28.5097	-23.0151	-28.4291	-26.8499
72.376	-36.7135	-28.5131	-23.0014	-28.4028	-26.8194
72.4086	-36.6991	-28.5161	-22.9876	-28.3755	-26.7891
72.4413	-36.6847	-28.5186	-22.9736	-28.3472	-26.7591
72.4739	-36.6703	-28.5204	-22.9595	-28.318	-26.7294
72.5065	-36.656	-28.5217	-22.9452	-28.288	-26.7
72.5392	-36.6418	-28.5222	-22.9308	-28.257	-26.6707
72.5718	-36.6276	-28.522	-22.9162	-28.2253	-26.6417
72.6044	-36.6135	-28.5209	-22.9015	-28.1927	-26.6129
72.6371	-36.5994	-28.519	-22.8866	-28.1593	-26.5842
72.6697	-36.5854	-28.5161	-22.8715	-28.1252	-26.5558
72.7023	-36.5714	-28.5122	-22.8564	-28.0905	-26.5275
72.735	-36.5574	-28.5073	-22.841	-28.055	-26.4993
72.7676	-36.5435	-28.5012	-22.8256	-28.019	-26.4714
72.8003	-36.5297	-28.4941	-22.81	-27.9824	-26.4436
72.8329	-36.5158	-28.4857	-22.7944	-27.9452	-26.416
72.8655	-36.502	-28.4762	-22.7786	-27.9076	-26.3886
72.8982	-36.4882	-28.4653	-22.7628	-27.8695	-26.3613
72.9308	-36.4744	-28.4532	-22.7469	-27.831	-26.3342
72.9634	-36.4606	-28.4398	-22.731	-27.7921	-26.3073
72.9961	-36.4467	-28.425	-22.715	-27.7528	-26.2806
73.0287	-36.4328	-28.4089	-22.699	-27.7132	-26.2541
73.0614	-36.4187	-28.3915	-22.683	-27.6734	-26.2278
73.094	-36.4045	-28.3726	-22.667	-27.6332	-26.2016
73.1266	-36.3901	-28.3524	-22.651	-27.5929	-26.1756
73.1593	-36.3755	-28.3308	-22.6351	-27.5523	-26.1499
73.1919	-36.3606	-28.3079	-22.6192	-27.5115	-26.1243
73.2245	-36.3454	-28.2836	-22.6033	-27.4706	-26.0989
73.2572	-36.3298	-28.258	-22.5875	-27.4295	-26.0736
73.2898	-36.3138	-28.2311	-22.5718	-27.3884	-26.0486
73.3225	-36.2974	-28.2029	-22.5561	-27.3471	-26.0238
73.3551	-36.2804	-28.1734	-22.5405	-27.3059	-25.9991
73.3877	-36.2628	-28.1426	-22.525	-27.2646	-25.9746
73.4204	-36.2446	-28.1107	-22.5096	-27.2233	-25.9504
73.453	-36.2256	-28.0776	-22.4942	-27.1821	-25.9263
73.4856	-36.2058	-28.0433	-22.479	-27.141	-25.9024
73.5183	-36.1852	-28.0078	-22.4638	-27.1	-25.8788
73.5509	-36.1636	-27.9713	-22.4487	-27.0591	-25.8553
73.5836	-36.141	-27.9338	-22.4336	-27.0184	-25.8321
73.6162	-36.1173	-27.8952	-22.4186	-26.9779	-25.809
73.6488	-36.0925	-27.8556	-22.4037	-26.9376	-25.7862
73.6815	-36.0664	-27.8151	-22.3888	-26.8976	-25.7636
73.7141	-36.039	-27.7737	-22.374	-26.8578	-25.7411
73.7467	-36.0103	-27.7314	-22.3592	-26.8183	-25.7189
73.7794	-35.9802	-27.6883	-22.3444	-26.7791	-25.6969
73.812	-35.9487	-27.6444	-22.3297	-26.7402	-25.6751
73.8446	-35.9157	-27.5998	-22.315	-26.7016	-25.6534
73.8773	-35.8812	-27.5545	-22.3003	-26.6633	-25.6319
73.9099	-35.8452	-27.5085	-22.2856	-26.6253	-25.6106
73.9426	-35.8076	-27.4619	-22.2709	-26.5877	-25.5895
73.9752	-35.7685	-27.4148	-22.2563	-26.5505	-25.5685
74.0078	-35.7278	-27.3671	-22.2417	-26.5136	-25.5476
74.0405	-35.6856	-27.3189	-22.227	-26.477	-25.5268
74.0731	-35.6419	-27.2703	-22.2124	-26.4409	-25.5062
74.1057	-35.5966	-27.2213	-22.1978	-26.4052	-25.4856
74.1384	-35.5499	-27.172	-22.1832	-26.37	-25.4652
74.171	-35.5016	-27.1224	-22.1686	-26.3352	-25.4448
74.2037	-35.452	-27.0725	-22.154	-26.3009	-25.4244
74.2363	-35.401	-27.0223	-22.1394	-26.2671	-25.4041
74.2689	-35.3486	-26.972	-22.1249	-26.234	-25.3838
74.3016	-35.2951	-26.9215	-22.1103	-26.2014	-25.3634
74.3342	-35.2403	-26.8709	-22.0958	-26.1695	-25.3431
74.3668	-35.1845	-26.8202	-22.0813	-26.1383	-25.3227
74.3995	-35.1277	-26.7694	-22.0668	-26.1078	-25.3022
74.4321	-35.07	-26.7186	-22.0523	-26.0781	-25.2817
74.4648	-35.0115	-26.6678	-22.0379	-26.0493	-25.2611
74.4974	-34.9524	-26.6169	-22.0235	-26.0213	-25.2404
74.53	-34.8927	-26.5661	-22.0092	-25.9943	-25.2196
74.5627	-34.8325	-26.5153	-21.9949	-25.9682	-25.1987
74.5953	-34.7721	-26.4646	-21.9806	-25.9432	-25.1777
74.6279	-34.7115	-26.414	-21.9663	-25.9191	-25.1566
74.6606	-34.6508	-26.3634	-21.9522	-25.8961	-25.1353
74.6932	-34.5903	-26.313	-21.938	-25.8741	-25.114
74.7258	-34.53	-26.2627	-21.9239	-25.8532	-25.0925
74.7585	-34.4701	-26.2126	-21.9099	-25.8334	-25.071
74.7911	-34.4108	-26.1626	-21.896	-25.8147	-25.0494
74.8238	-34.3521	-26.1129	-21.8822	-25.797	-25.0278
74.8564	-34.2942	-26.0633	-21.8684	-25.7804	-25.0061
74.889	-34.2372	-26.014	-21.8547	-25.7648	-24.9843
74.9217	-34.1814	-25.965	-21.8411	-25.7502	-24.9625
74.9543	-34.1267	-25.9162	-21.8276	-25.7366	-24.9407
74.9869	-34.0733	-25.8678	-21.8142	-25.724	-24.9189
75.0196	-34.0214	-25.8196	-21.8009	-25.7122	-24.8971
75.0522	-33.971	-25.7718	-21.7876	-25.7013	-24.8753
75.0849	-33.9223	-25.7243	-21.7745	-25.6912	-24.8535
75.1175	-33.8753	-25.6772	-21.7614	-25.6818	-24.8318
75.1501	-33.8301	-25.6305	-21.7484	-25.673	-24.8101
75.1828	-33.7868	-25.5842	-21.7354	-25.6649	-24.7886
75.2154	-33.7454	-25.5384	-21.7225	-25.6574	-24.7671
75.248	-33.706	-25.493	-21.7097	-25.6503	-24.7459
75.2807	-33.6686	-25.4481	-21.6969	-25.6436	-24.7248
75.3133	-33.6333	-25.4038	-21.6842	-25.6374	-24.7041
75.346	-33.6001	-25.36	-21.6715	-25.6314	-24.6838
75.3786	-33.569	-25.3168	-21.6588	-25.6257	-24.6639
75.4112	-33.54	-25.2741	-21.6461	-25.6203	-24.6445
75.4439	-33.5131	-25.2321	-21.6334	-25.615	-24.6257
75.4765	-33.4882	-25.1906	-21.6207	-25.6098	-24.6077
75.5091	-33.4653	-25.1498	-21.608	-25.6047	-24.5905
75.5418	-33.4444	-25.1096	-21.5952	-25.5996	-24.5743
75.5744	-33.4255	-25.07	-21.5823	-25.5945	-24.559
75.607	-33.4084	-25.031	-21.5693	-25.5894	-24.545
75.6397	-33.3932	-24.9926	-21.5562	-25.5843	-24.5322
75.6723	-33.3796	-24.9548	-21.543	-25.5791	-24.5209
75.705	-33.3678	-24.9175	-21.5296	-25.5737	-24.5111
75.7376	-33.3575	-24.8808	-21.5161	-25.5683	-24.5029
75.7702	-33.3488	-24.8447	-21.5023	-25.5627	-24.4965
75.8029	-33.3414	-24.8091	-21.4883	-25.5569	-24.492
75.8355	-33.3354	-24.774	-21.4741	-25.5509	-24.4896
75.8681	-33.3306	-24.7395	-21.4597	-25.5448	-24.4893
75.9008	-33.3268	-24.7054	-21.445	-25.5385	-24.4913
75.9334	-33.3241	-24.6718	-21.4301	-25.532	-24.4956
75.9661	-33.3223	-24.6388	-21.4148	-25.5253	-24.5025
75.9987	-33.3213	-24.6061	-21.3993	-25.5185	-24.512
76.0313	-33.321	-24.574	-21.3835	-25.5115	-24.5241
76.064	-33.3212	-24.5422	-21.3673	-25.5044	-24.5391
76.0966	-33.322	-24.5109	-21.3509	-25.4971	-24.557
76.1292	-33.3231	-24.48	-21.3341	-25.4898	-24.5779
76.1619	-33.3246	-24.4495	-21.3169	-25.4824	-24.6019
76.1945	-33.3263	-24.4194	-21.2994	-25.475	-24.6291
76.2272	-33.328	-24.3896	-21.2816	-25.4676	-24.6595
76.2598	-33.3298	-24.3602	-21.2635	-25.4602	-24.6932
76.2924	-33.3316	-24.3311	-21.245	-25.4529	-24.7302
76.3251	-33.3333	-24.3022	-21.2261	-25.4458	-24.7706
76.3577	-33.3347	-24.2737	-21.207	-25.4388	-24.8144
76.3903	-33.336	-24.2453	-21.1875	-25.432	-24.8616
76.423	-33.337	-24.2172	-21.1677	-25.4255	-24.9123
76.4556	-33.3377	-24.1893	-21.1476	-25.4192	-24.9664
76.4883	-33.338	-24.1615	-21.1273	-25.4134	-25.024
76.5209	-33.338	-24.1339	-21.1066	-25.4079	-25.085
76.5535	-33.3376	-24.1063	-21.0857	-25.4028	-25.1494
76.5862	-33.3368	-24.0787	-21.0645	-25.3982	-25.2171
76.6188	-33.3356	-24.0512	-21.0431	-25.3941	-25.2881
76.6514	-33.334	-24.0237	-21.0214	-25.3905	-25.3624
76.6841	-33.332	-23.996	-20.9995	-25.3873	-25.4398
76.7167	-33.3296	-23.9683	-20.9774	-25.3847	-25.5203
76.7493	-33.3268	-23.9405	-20.9551	-25.3826	-25.6038
76.782	-33.3237	-23.9126	-20.9326	-25.381	-25.6901
76.8146	-33.3202	-23.8845	-20.9099	-25.38	-25.7793
76.8473	-33.3163	-23.8562	-20.8869	-25.3794	-25.871
76.8799	-33.3121	-23.8278	-20.8638	-25.3793	-25.9653
76.9125	-33.3077	-23.7992	-20.8405	-25.3796	-26.0618
76.9452	-33.3029	-23.7705	-20.817	-25.3803	-26.1606
76.9778	-33.2979	-23.7416	-20.7933	-25.3814	-26.2613
77.0104	-33.2927	-23.7126	-20.7693	-25.3827	-26.3639
77.0431	-33.2872	-23.6834	-20.7452	-25.3843	-26.4681
77.0757	-33.2816	-23.6542	-20.7208	-25.386	-26.5738
77.1084	-33.2759	-23.6248	-20.6962	-25.3878	-26.6806
77.141	-33.27	-23.5954	-20.6714	-25.3896	-26.7886
77.1736	-33.2641	-23.566	-20.6463	-25.3913	-26.8974
77.2063	-33.2581	-23.5365	-20.6211	-25.3928	-27.0068
77.2389	-33.252	-23.5071	-20.5956	-25.3941	-27.1167
77.2715	-33.2459	-23.4778	-20.57	-25.395	-27.227
77.3042	-33.2398	-23.4486	-20.5441	-25.3955	-27.3373
77.3368	-33.2336	-23.4195	-20.518	-25.3954	-27.4476
77.3695	-33.2275	-23.3907	-20.4918	-25.3947	-27.5576
77.4021	-33.2213	-23.362	-20.4654	-25.3933	-27.6672
77.4347	-33.215	-23.3337	-20.4387	-25.3912	-27.7763
77.4674	-33.2088	-23.3057	-20.412	-25.3881	-27.8848
77.5	-33.2024	-23.2781	-20.385	-25.3841	-27.9924
77.5326	-33.196	-23.2509	-20.3579	-25.379	-28.099
77.5653	-33.1894	-23.2241	-20.3307	-25.3729	-28.2046
77.5979	-33.1826	-23.1978	-20.3033	-25.3655	-28.3091
77.6305	-33.1756	-23.172	-20.2758	-25.357	-28.4122
77.6632	-33.1684	-23.1467	-20.2482	-25.3473	-28.514
77.6958	-33.1608	-23.1219	-20.2205	-25.3362	-28.6143
77.7285	-33.1529	-23.0977	-20.1927	-25.3238	-28.7131
77.7611	-33.1445	-23.0739	-20.1648	-25.31	-28.8103
77.7937	-33.1356	-23.0508	-20.1368	-25.2949	-28.9059
77.8264	-33.126	-23.0282	-20.1088	-25.2784	-28.9997
77.859	-33.1158	-23.0061	-20.0807	-25.2606	-29.0918
77.8916	-33.1048	-22.9846	-20.0525	-25.2414	-29.182
77.9243	-33.0929	-22.9636	-20.0243	-25.2208	-29.2704
77.9569	-33.08	-22.9432	-19.9961	-25.1989	-29.357
77.9896	-33.0661	-22.9233	-19.9677	-25.1757	-29.4416
78.0222	-33.051	-22.904	-19.9393	-25.1513	-29.5243
78.0548	-33.0347	-22.8851	-19.9109	-25.1256	-29.6051
78.0875	-33.017	-22.8667	-19.8824	-25.0988	-29.684
78.1201	-32.9978	-22.8488	-19.8538	-25.0708	-29.761
78.1527	-32.9772	-22.8314	-19.8252	-25.0418	-29.836
78.1854	-32.955	-22.8144	-19.7965	-25.0118	-29.909
78.218	-32.9311	-22.7978	-19.7678	-24.9808	-29.9802
78.2507	-32.9055	-22.7817	-19.739	-24.949	-30.0494
78.2833	-32.8781	-22.7659	-19.7102	-24.9164	-30.1166
78.3159	-32.8489	-22.7504	-19.6814	-24.883	-30.1819
78.3486	-32.8177	-22.7353	-19.6525	-24.849	-30.2453
78.3812	-32.7847	-22.7205	-19.6236	-24.8144	-30.3066
78.4138	-32.7497	-22.706	-19.5947	-24.7793	-30.366
78.4465	-32.7128	-22.6918	-19.5658	-24.7437	-30.4234
78.4791	-32.6739	-22.6777	-19.537	-24.7078	-30.4788
78.5117	-32.633	-22.6639	-19.5081	-24.6715	-30.5322
78.5444	-32.5902	-22.6502	-19.4794	-24.635	-30.5835
78.577	-32.5455	-22.6367	-19.4506	-24.5984	-30.6327
78.6097	-32.499	-22.6233	-19.422	-24.5616	-30.6798
78.6423	-32.4506	-22.61	-19.3934	-24.5248	-30.7247
78.6749	-32.4004	-22.5967	-19.365	-24.4879	-30.7674
78.7076	-32.3485	-22.5834	-19.3366	-24.4512	-30.8079
78.7402	-32.2949	-22.5702	-19.3084	-24.4146	-30.846
78.7728	-32.2398	-22.5569	-19.2803	-24.3781	-30.8818
78.8055	-32.1831	-22.5435	-19.2523	-24.3419	-30.9152
78.8381	-32.1249	-22.53	-19.2244	-24.3059	-30.9461
78.8708	-32.0654	-22.5163	-19.1967	-24.2701	-30.9745
78.9034	-32.0046	-22.5025	-19.1691	-24.2347	-31.0002
78.936	-31.9426	-22.4885	-19.1416	-24.1997	-31.0232
78.9687	-31.8794	-22.4743	-19.1142	-24.1649	-31.0433
79.0013	-31.8153	-22.4598	-19.0869	-24.1305	-31.0606
79.0339	-31.7501	-22.445	-19.0597	-24.0965	-31.0749
79.0666	-31.6842	-22.43	-19.0327	-24.0628	-31.0862
79.0992	-31.6175	-22.4145	-19.0057	-24.0295	-31.0943
79.1319	-31.5502	-22.3988	-18.9788	-23.9965	-31.0991
79.1645	-31.4824	-22.3827	-18.9521	-23.9638	-31.1006
79.1971	-31.4141	-22.3662	-18.9254	-23.9315	-31.0987
79.2298	-31.3455	-22.3493	-18.8988	-23.8994	-31.0933
79.2624	-31.2766	-22.332	-18.8722	-23.8675	-31.0843
79.295	-31.2076	-22.3143	-18.8457	-23.836	-31.0717
79.3277	-31.1386	-22.2962	-18.8193	-23.8046	-31.0554
79.3603	-31.0696	-22.2776	-18.793	-23.7734	-31.0352
79.393	-31.0007	-22.2587	-18.7667	-23.7423	-31.0112
79.4256	-30.9321	-22.2394	-18.7404	-23.7113	-30.9833
79.4582	-30.8637	-22.2198	-18.7143	-23.6804	-30.9515
79.4909	-30.7957	-22.1997	-18.6882	-23.6496	-30.9157
79.5235	-30.7281	-22.1793	-18.6621	-23.6187	-30.876
79.5561	-30.661	-22.1585	-18.6362	-23.5878	-30.8322
79.5888	-30.5945	-22.1374	-18.6103	-23.5569	-30.7844
79.6214	-30.5285	-22.1159	-18.5845	-23.5258	-30.7326
79.654	-30.4632	-22.0941	-18.5588	-23.4946	-30.6769
79.6867	-30.3986	-22.072	-18.5333	-23.4633	-30.6172
79.7193	-30.3346	-22.0496	-18.5078	-23.4319	-30.5537
79.752	-30.2714	-22.0268	-18.4825	-23.4002	-30.4864
79.7846	-30.2088	-22.0038	-18.4572	-23.3685	-30.4154
79.8172	-30.1471	-21.9804	-18.4321	-23.3365	-30.3408
79.8499	-30.086	-21.9567	-18.4071	-23.3045	-30.2626
79.8825	-30.0257	-21.9327	-18.3822	-23.2722	-30.1811
79.9151	-29.9661	-21.9084	-18.3574	-23.2399	-30.0964
79.9478	-29.9072	-21.8838	-18.3328	-23.2074	-30.0086
79.9804	-29.8489	-21.8588	-18.3082	-23.1749	-29.9178
80.0131	-29.7913	-21.8335	-18.2837	-23.1423	-29.8244
80.0457	-29.7343	-21.8079	-18.2593	-23.1096	-29.7283
80.0783	-29.6779	-21.7819	-18.235	-23.077	-29.63
80.111	-29.622	-21.7556	-18.2107	-23.0445	-29.5295
80.1436	-29.5666	-21.7289	-18.1866	-23.012	-29.427
80.1762	-29.5117	-21.7019	-18.1624	-22.9796	-29.3229
[truncated: 301 more rows]

## Sheet: 350 nm
	Fluorescence counts at 350 nm
Temperature, °C	mCherry-VPS34-CII WT	mCherry-VPS34-CII (VPS34 199-REIE-202 > AAAA)	mCherry-VPS34-CII (VPS34 199-REIE-202 > ERIR)	mCherry-VPS34-CII (VPS15 579-SHMIT-583 > DDMIE)	mCherry-VPS34-CII (VPS34 199-REIE-202 > ERIR and VPS15 579-SHMIT-583 > DDMIE)
15	3820.55	3374.97	2419.73	3039.6	2747.96
15.0326	3826.92	3365.75	2409.48	3025.16	2740.8
15.0653	3828.1	3360.32	2409.86	3018.13	2734.69
15.0979	3827.09	3351.02	2405.6	3014.12	2732.98
15.1305	3827.65	3348.06	2400.44	3016.3	2727.79
15.1632	3828.61	3344.47	2402.46	3012.49	2731.52
15.1958	3823.63	3335.59	2399.81	3001.52	2730.27
15.2285	3819.99	3332.19	2395.13	3002.17	2724.44
15.2611	3824.69	3331.65	2392.35	3000.23	2720.91
15.2937	3827.79	3329.37	2390.87	2995.88	2723.74
15.3264	3824.77	3324.23	2389.79	2992.1	2719.71
15.359	3825.38	3321.7	2389.14	2991.03	2721.25
15.3916	3823.74	3318.41	2388.56	2991.44	2717.97
15.4243	3825.12	3316.37	2389.81	2982.61	2717.57
15.4569	3824.21	3313.41	2386.76	2985.93	2718.1
15.4896	3823.88	3311.15	2386.94	2981.36	2713.65
15.5222	3821.2	3306.3	2380.95	2978.68	2710.44
15.5548	3818.9	3304.69	2376.77	2977.58	2710.31
15.5875	3816	3302.02	2379.95	2974.62	2705.74
15.6201	3808.03	3296.61	2373.05	2967.1	2707.04
15.6527	3812.21	3293.98	2377.1	2968.97	2702.72
15.6854	3810.96	3294.4	2372.43	2967.27	2704.98
15.718	3807.58	3292.48	2375.14	2964.46	2703.62
15.7507	3808.16	3291.57	2373.03	2960.27	2702.79
15.7833	3812.06	3288.13	2371.91	2962.61	2699.43
15.8159	3811.08	3287.11	2370.4	2959.64	2700.54
15.8486	3804.88	3280.42	2370.66	2952.59	2697.25
15.8812	3801.24	3281.03	2367.04	2952.76	2699.9
15.9138	3804.75	3279.81	2365.65	2951.68	2698.3
15.9465	3804.23	3275.86	2363.1	2948.1	2693.89
15.9791	3801.24	3271.77	2364.37	2944.01	2694.62
16.0117	3798.37	3271.39	2363.18	2938.99	2692.83
16.0444	3795.63	3266.25	2361.54	2942.63	2691.83
16.077	3798.15	3266.17	2360.83	2943.57	2690.75
16.1097	3796.73	3263.39	2362.7	2934.93	2688.24
16.1423	3793.64	3261.26	2359.26	2940.81	2690.06
16.1749	3793.49	3258.23	2357.85	2931.38	2688.29
16.2076	3792.7	3258.4	2355.83	2935.52	2690.03
16.2402	3790.5	3255.42	2357.41	2924.72	2686.97
16.2728	3790.71	3252.48	2357.94	2930.69	2689.74
16.3055	3784.81	3247.83	2352.46	2923.77	2685.39
16.3381	3784.42	3243.34	2352.66	2922.62	2686.96
16.3708	3783.17	3246.73	2350.28	2921.04	2681.25
16.4034	3781.38	3246.81	2351.47	2920.73	2681.99
16.436	3777.55	3235.37	2347.26	2913.51	2676.46
16.4687	3775.12	3238.79	2345.17	2917.67	2674.6
16.5013	3777.7	3237.98	2345.25	2912.27	2675.32
16.5339	3778.39	3236.62	2343.86	2913.77	2677.04
16.5666	3772.97	3232.75	2343.23	2908.21	2678.96
16.5992	3773.28	3230.74	2341.74	2911.1	2674.71
16.6319	3772.26	3229.27	2339.57	2907.74	2670.15
16.6645	3776.35	3231.3	2337.86	2905.5	2671.75
16.6971	3773.27	3223.85	2335.37	2900.35	2672.7
16.7298	3772.07	3224.79	2334.08	2902.7	2670.8
16.7624	3773.85	3224.79	2330.01	2897.83	2667.36
16.795	3774.13	3221.8	2328.38	2895.05	2671.5
16.8277	3770.28	3211.71	2328.69	2893.49	2664.99
16.8603	3770.3	3213.82	2326.12	2891.14	2666.22
16.893	3768.99	3207.45	2320.36	2896.86	2665.04
16.9256	3767.9	3209.8	2322.2	2889.31	2662.09
16.9582	3763.9	3208.57	2324.04	2886.93	2665.36
16.9909	3766.3	3206.94	2322.22	2888.6	2664.4
17.0235	3762.07	3194.17	2319.72	2885.57	2657.12
17.0561	3760.51	3198.63	2318.86	2882.39	2658.36
17.0888	3758.53	3191.36	2321.13	2876.36	2658.27
17.1214	3761.18	3191.59	2320.49	2875.62	2656.35
17.154	3757.74	3190.94	2311.52	2878.92	2654.57
17.1867	3756.49	3194.07	2314.91	2875.85	2651.79
17.2193	3754.4	3183.7	2314.1	2874.03	2650.49
17.252	3758.47	3184.27	2310.69	2868.67	2649.22
17.2846	3748.77	3184.05	2309.51	2867.3	2648.97
17.3172	3750.45	3179.1	2307.41	2861.18	2650.56
17.3499	3749.82	3175.39	2309.9	2864.35	2648.79
17.3825	3748.66	3172.58	2308.48	2862.55	2647.29
17.4151	3749.34	3169.75	2308.1	2858.95	2643.41
17.4478	3747.77	3172.42	2304.97	2858.5	2641.2
17.4804	3741.23	3170.95	2300.86	2851.79	2643.51
17.5131	3742.13	3169.1	2299.63	2848.15	2640.18
17.5457	3739.12	3160.39	2297.89	2844.09	2640.92
17.5783	3737.43	3164.1	2298.96	2844.95	2638.42
17.611	3733.63	3156.27	2294.76	2843.64	2636.28
17.6436	3728.95	3158.8	2297.34	2843.77	2634.36
17.6762	3722.71	3158.85	2298.2	2838.72	2633.74
17.7089	3724.41	3156.95	2296.43	2838.82	2633.36
17.7415	3727.4	3154.39	2296.39	2837.38	2631.7
17.7742	3721.61	3151.66	2296.99	2837.27	2629.45
17.8068	3724.07	3143.09	2296.62	2831.15	2632.97
17.8394	3719.45	3143.91	2292.1	2830.12	2633.58
17.8721	3724.94	3144.45	2290.22	2830.15	2627.5
17.9047	3718.91	3144.81	2289.49	2829.53	2627.02
17.9373	3711.51	3140.06	2288.92	2826.47	2627.27
17.97	3712.81	3133.29	2287.47	2824.54	2625
18.0026	3714.11	3132.93	2285.97	2822.84	2622.92
18.0352	3710.58	3128.54	2288.64	2821.08	2621.43
18.0679	3706.2	3126.12	2286.7	2823.86	2624.75
18.1005	3704.62	3131.59	2282.42	2820.02	2623.93
18.1332	3707.24	3132.15	2282.54	2817.27	2619.24
18.1658	3710.39	3123.69	2283.56	2816.03	2616.36
18.1984	3708.73	3122.98	2281.09	2811.4	2616.47
18.2311	3707.46	3120.97	2278.42	2808.63	2617.34
18.2637	3704.52	3120.36	2278.88	2807.71	2613.7
18.2963	3706.5	3117.22	2276.07	2806.15	2610.34
18.329	3706.82	3114.78	2278.79	2806.3	2611.99
18.3616	3703.39	3114.02	2275.18	2800.56	2612.51
18.3943	3703.22	3112.62	2273.26	2799.12	2613.52
18.4269	3699.14	3109.84	2270.9	2800.44	2611.16
18.4595	3695.16	3107.85	2271.27	2799.29	2608.18
18.4922	3697.03	3100.93	2266.34	2795.56	2607.01
18.5248	3692.05	3101.26	2269.83	2790.99	2604.36
18.5574	3693.18	3102.64	2265.17	2787.59	2601.93
18.5901	3689.1	3100.32	2263.7	2790.43	2604.79
18.6227	3692.78	3099.76	2261.37	2789.5	2602.17
18.6554	3688.82	3097.54	2259.47	2785.97	2599.97
18.688	3684.73	3093.38	2256.82	2784.6	2599.87
18.7206	3689.37	3093.53	2256.16	2789.74	2598.52
18.7533	3680.46	3088.42	2255.92	2783.74	2596.74
18.7859	3672.12	3088.68	2256.28	2780.62	2594.4
18.8185	3675.14	3087.11	2254.47	2778.47	2596.72
18.8512	3672.04	3085.17	2253.25	2780.21	2601.9
18.8838	3667.33	3081.3	2248.6	2778.63	2596.33
18.9164	3664.52	3073.94	2246.72	2772.29	2596.54
18.9491	3665.87	3073.52	2248.39	2769.13	2592.7
18.9817	3667.07	3071.79	2248.44	2767.87	2594.21
19.0144	3664.01	3073.88	2242.72	2767.59	2592.41
19.047	3662.6	3070.08	2244.28	2766.29	2590
19.0796	3672.88	3067.38	2245.31	2762.37	2589.98
19.1123	3670.28	3064.59	2243.86	2762.32	2590.8
19.1449	3665.19	3064.48	2242.99	2758.6	2585.4
19.1775	3663.43	3062.5	2243.1	2755.33	2584.71
19.2102	3658.33	3060.24	2240.65	2756.54	2579.25
19.2428	3652.11	3056.85	2238.35	2754.46	2579.02
19.2755	3652.99	3065.81	2238.61	2748.27	2583.7
19.3081	3650.03	3061.7	2238.79	2751.9	2580.5
19.3407	3646.72	3061.28	2237.16	2751.44	2579.03
19.3734	3649.47	3056.92	2235.58	2747.88	2576.28
19.406	3643.37	3054.51	2230.28	2745.04	2579.05
19.4386	3643.83	3049.54	2230.4	2743.48	2571.84
19.4713	3642.84	3048.41	2234.75	2739.16	2574.39
19.5039	3637.51	3050	2233.77	2739.68	2570.81
19.5366	3639.55	3048.27	2228.4	2738.42	2571.47
19.5692	3640.8	3046.24	2227.14	2740.31	2572.64
19.6018	3634.52	3042.85	2218.28	2735.79	2572.93
19.6345	3629.02	3040.11	2222.29	2736.7	2567.18
19.6671	3628.77	3037.5	2225.25	2732.01	2570.73
19.6997	3623.61	3029.68	2220.11	2729.71	2567.41
19.7324	3627.84	3032.6	2221.87	2727.04	2568.72
19.765	3625.35	3029.22	2220.07	2721.64	2564.62
19.7977	3623.85	3030.26	2213.86	2725.14	2564.11
19.8303	3619.29	3022.86	2212.77	2721.92	2565.18
19.8629	3621.07	3028.01	2215.36	2720.89	2564.64
19.8956	3619.79	3022.18	2216.48	2717.74	2562.62
19.9282	3616.91	3023.57	2216.65	2717.39	2557.5
19.9608	3617.99	3023.99	2210.64	2716	2557.56
19.9935	3619.76	3016.59	2211.03	2710.92	2562.71
20.0261	3619.09	3017.8	2212.2	2713.3	2555.36
20.0587	3613.94	3014.06	2209.49	2714.5	2554.88
20.0914	3609.78	3011.52	2208.65	2708.87	2556.79
20.124	3609.39	3014.36	2210.15	2704.92	2549.8
20.1567	3606.7	3014.55	2204.94	2705.98	2552.61
20.1893	3606.28	3009.44	2205.64	2702.64	2549.51
20.2219	3607.44	3008.39	2204.9	2700.57	2549.55
20.2546	3604.03	3006.44	2203.31	2694.52	2548.79
20.2872	3602.14	3004.47	2204.37	2695.24	2549.85
20.3198	3606.93	3000.96	2204.61	2696.01	2551.81
20.3525	3603.5	2999.65	2200.67	2694.37	2548.06
20.3851	3603.81	2996.31	2197.02	2688.4	2547.99
20.4178	3605.37	2992.96	2194.7	2688.14	2546.17
20.4504	3593.36	2995.17	2194.18	2689.13	2543.11
20.483	3593.67	2991.56	2191.14	2685.03	2547.76
20.5157	3596.47	2989.59	2191.63	2681.17	2539.3
20.5483	3596.69	2986.19	2190.64	2682.05	2541.56
20.5809	3594.27	2991.42	2191.9	2680.9	2538.89
20.6136	3592.35	2989.71	2191.43	2676.86	2537.4
20.6462	3588.77	2981.3	2189.18	2684.22	2540.23
20.6789	3588.01	2980.74	2189.44	2679.61	2539.54
20.7115	3587.2	2976.79	2188.08	2682.22	2534.42
20.7441	3587.02	2976.63	2187.86	2675.2	2538.31
20.7768	3583.85	2976.26	2188.63	2669.92	2526.84
20.8094	3586.1	2976.25	2183.64	2671.24	2530.62
20.842	3581.9	2975.1	2180.12	2673.5	2533.48
20.8747	3580.8	2971.57	2180.48	2669.67	2530.94
20.9073	3577.62	2970.95	2186.43	2666.56	2531.33
20.9399	3575.65	2968.97	2184.23	2664.96	2529.15
20.9726	3574.84	2965.69	2174.97	2662.71	2524.82
21.0052	3568.29	2962.96	2179.15	2659.62	2529.64
21.0379	3567.74	2958.1	2176.03	2659.83	2526.7
21.0705	3565.79	2959.01	2176.46	2655.89	2523.6
21.1031	3568.55	2957.79	2175.69	2658.64	2524.28
21.1358	3566.53	2956.8	2174.14	2655.65	2522.38
21.1684	3567.85	2958.58	2172.86	2652.64	2522.3
21.201	3564.07	2955.4	2173.15	2650.57	2519.96
21.2337	3563.78	2949.06	2170.67	2646.89	2521.28
21.2663	3558.89	2952.67	2170.22	2647.25	2522.23
21.299	3561.35	2949.24	2166.98	2644.8	2518.47
21.3316	3556.52	2946.86	2167.64	2640.21	2516.3
21.3642	3551.29	2943.07	2169.9	2638.95	2514.45
21.3969	3551.32	2941.13	2168.56	2640.71	2516.04
21.4295	3546.91	2943.07	2166.65	2638.54	2512.84
21.4621	3543.61	2943.64	2165.08	2632.47	2510.56
21.4948	3543.87	2940.18	2164.08	2628.9	2512.15
21.5274	3537.92	2934.75	2163.62	2630.8	2508.27
21.5601	3537.43	2937.97	2160.52	2630.97	2508.85
21.5927	3538.52	2934.05	2158.68	2630.16	2511.34
21.6253	3536.23	2930.8	2161.16	2627.88	2510.05
21.658	3534.25	2928.08	2161.65	2625.12	2506.33
21.6906	3531.92	2922.87	2157.93	2626.7	2506.17
21.7232	3530.98	2925.97	2157.27	2625.52	2506.91
21.7559	3529.86	2925.08	2152.26	2625.17	2504.72
21.7885	3526.21	2918.59	2151.16	2624.37	2503.84
21.8211	3526.22	2916.8	2149.44	2620.31	2505.27
21.8538	3525.59	2917.04	2150.72	2620.15	2505.1
21.8864	3531.6	2912.12	2149.83	2619.53	2502.36
21.9191	3524.89	2914.36	2146.15	2613.68	2499.25
21.9517	3521.69	2915.62	2147.33	2615.02	2501.26
21.9843	3520.81	2907.85	2145.44	2616.84	2497.9
22.017	3518.17	2908.86	2142.99	2614.92	2492.16
22.0496	3519.07	2906.14	2142.21	2609.06	2495.95
22.0822	3517.48	2906.35	2140.23	2610.44	2491.33
22.1149	3516.32	2900.61	2140.93	2611.06	2491.75
22.1475	3514.82	2902.85	2140.73	2615.55	2491.35
22.1802	3512.41	2904.42	2135.01	2604.38	2489.82
22.2128	3513.13	2906.17	2134.8	2596.29	2491.57
22.2454	3510.65	2897.93	2137.81	2599.75	2490.34
22.2781	3507.28	2899.33	2134.77	2599.07	2486.46
22.3107	3503.52	2896.52	2137.58	2597.16	2486.11
22.3433	3501.44	2896.8	2137.48	2594.93	2485.37
22.376	3503.19	2895.04	2135.07	2596.55	2482.77
22.4086	3501.89	2899.03	2134.92	2597.16	2480.01
22.4413	3503.26	2885.1	2129.41	2596.55	2482.5
22.4739	3500.24	2885.11	2129.78	2596.14	2481.63
22.5065	3497.75	2880.28	2130.19	2590.77	2478.2
22.5392	3499.42	2877.3	2133.29	2587.28	2476.69
22.5718	3491.56	2878.68	2127.07	2585.02	2481.66
22.6044	3492.26	2880.85	2122.73	2590.1	2476.79
22.6371	3492.87	2880.71	2123.45	2582.72	2480.26
22.6697	3490.89	2880.21	2130.04	2584.48	2480.82
22.7023	3485.45	2870.15	2127.94	2578.14	2476.44
22.735	3486.79	2871.99	2128.48	2579.49	2478.77
22.7676	3485.78	2870.35	2117.77	2573.5	2473.95
22.8003	3482.94	2871.72	2120.66	2574.72	2475.45
22.8329	3474.46	2868.69	2114.89	2567.86	2474.43
22.8655	3481.96	2866.89	2118.48	2570.94	2476.23
22.8982	3479.15	2864.16	2116.45	2569.99	2470.4
22.9308	3478.53	2864.35	2116.18	2567.89	2471.71
22.9634	3477.35	2863.49	2117.53	2569.39	2467.15
22.9961	3480.46	2861.23	2117.5	2568.3	2467.81
23.0287	3476.2	2857.52	2113.86	2564.33	2466.18
23.0614	3477.05	2858.16	2112.15	2563.73	2466.68
23.094	3474.72	2854.45	2109.61	2566.52	2462.98
23.1266	3475.24	2850.51	2109.51	2563.21	2468.59
23.1593	3477.3	2851.79	2110.46	2557.87	2461.78
23.1919	3470.62	2855	2108.49	2556.79	2466.28
23.2245	3457.64	2856.19	2107.78	2556.95	2466.86
23.2572	3457.71	2851.11	2106.5	2553.54	2461.53
23.2898	3456.66	2846.94	2106.89	2552.29	2462.15
23.3225	3460.1	2842.95	2106.02	2551.7	2461.66
23.3551	3459.26	2842.76	2101.92	2551.06	2459.8
23.3877	3455.12	2845.56	2098.2	2550.58	2461.14
23.4204	3454.63	2844.78	2100.22	2550.53	2457.36
23.453	3454.95	2839.22	2097.09	2549.53	2455.14
23.4856	3452.01	2834.65	2098.35	2546.34	2450.94
23.5183	3451.99	2835.73	2095.68	2543.53	2449.07
23.5509	3446.77	2834.86	2092.53	2541.95	2452.15
23.5836	3444.66	2832.27	2090.94	2539.87	2454.14
23.6162	3441.18	2831.67	2089.61	2537.17	2452.74
23.6488	3442.11	2831.96	2091.34	2537.14	2449.53
23.6815	3443.13	2830.77	2090.89	2536.74	2447.28
23.7141	3438.15	2830.45	2089.93	2535.91	2444.17
23.7467	3434.22	2827.86	2089.71	2532.85	2444.55
23.7794	3431.7	2823.4	2090	2527.64	2444.53
23.812	3430.15	2823.73	2088.63	2525.7	2443.14
23.8446	3432.16	2821.23	2084.45	2526.63	2444.07
23.8773	3431.55	2818.82	2082.95	2528.3	2443.3
23.9099	3429.38	2817.45	2081.62	2528.31	2443.15
23.9426	3428.59	2814.13	2079.86	2523.73	2441.35
23.9752	3424.05	2813.74	2081.84	2522.39	2441.09
24.0078	3421.06	2813.19	2080.33	2524	2440.42
24.0405	3422.68	2810.62	2075.52	2521.34	2439.35
24.0731	3425.02	2808.91	2075.99	2520.56	2435.98
24.1057	3423.98	2809.17	2075.73	2515.78	2433.87
24.1384	3420.25	2809.44	2071.95	2514.01	2433.79
24.171	3415.02	2804.04	2074.35	2511.11	2436.02
24.2037	3413.97	2801.54	2070.64	2512.07	2437.66
24.2363	3413.74	2803.69	2071.59	2511.14	2433.58
24.2689	3412.32	2801.8	2070.85	2512.42	2432.8
24.3016	3410.88	2798.17	2069.89	2507.43	2432.15
24.3342	3409.49	2795.6	2068.91	2505.69	2430.31
24.3668	3407.88	2796.83	2068.44	2508.7	2426.57
24.3995	3402.78	2789.33	2072.29	2508.46	2421.97
24.4321	3401.82	2791.53	2071.64	2500.04	2426.9
24.4648	3402.06	2791.81	2067.72	2499.04	2427.5
24.4974	3402.18	2787.07	2070.76	2499.86	2425.07
24.53	3399.22	2789.04	2068.37	2503.78	2422.8
24.5627	3398.95	2783.29	2068.84	2506.22	2414.34
24.5953	3399.03	2781.78	2064.93	2502.32	2416.59
24.6279	3398.09	2783.6	2062.64	2502.01	2415.77
24.6606	3398.33	2783.77	2063.11	2500.6	2413.59
24.6932	3391.73	2783.45	2064.69	2488.86	2414.51
24.7258	3388.41	2780.35	2062.52	2489.67	2415.62
24.7585	3389.37	2776.03	2065.62	2489.1	2416.36
24.7911	3384.63	2773.99	2064.12	2491.83	2414.07
24.8238	3393.48	2777.25	2059.51	2486.65	2414.88
24.8564	3390.56	2773.95	2061.35	2486.07	2410.37
24.889	3377.78	2777.38	2054.7	2484.05	2411.16
24.9217	3380.25	2772.4	2057.36	2481.02	2409.44
24.9543	3381.31	2769.15	2059.49	2484.97	2412.46
24.9869	3378.82	2769.21	2056.86	2485.16	2411.08
25.0196	3376.84	2770.68	2053.2	2474.51	2406.41
25.0522	3376.73	2771.42	2055.41	2472.93	2404.54
25.0849	3374.84	2767.22	2052.79	2469.96	2409.44
25.1175	3370.03	2760.96	2051.6	2467.1	2406.89
25.1501	3366.62	2759.59	2051.66	2470.51	2404.9
25.1828	3368.15	2761.48	2047.46	2471.77	2405.83
25.2154	3369.58	2759.08	2045.06	2473.07	2404.43
25.248	3365.98	2758.9	2048.23	2469.46	2403.29
25.2807	3362.84	2759.76	2044.11	2464.82	2405.79
25.3133	3363.25	2754.56	2044.36	2466.19	2398.43
25.346	3365.62	2751.76	2042.09	2460.86	2398.91
25.3786	3362.81	2751.84	2039.74	2459.37	2399.69
25.4112	3365.77	2749.15	2041.21	2460.15	2399.63
25.4439	3362.11	2749.13	2040.24	2459.58	2397.71
25.4765	3360.06	2748.5	2040.66	2455.62	2397.49
25.5091	3357.97	2743.49	2035.4	2450.92	2394.59
25.5418	3352.51	2742.05	2035.73	2461.24	2395.92
25.5744	3353.16	2741.97	2034.7	2457.66	2394.38
25.607	3351.56	2742.72	2031.02	2452.39	2395.35
25.6397	3351.5	2737.77	2032.55	2452.06	2390.55
25.6723	3351.2	2732.47	2035.08	2447.05	2391.3
25.705	3341.48	2733.39	2031.9	2446.16	2391.45
25.7376	3343.28	2736.12	2032.18	2445.89	2391.39
25.7702	3340.24	2735.78	2030.45	2448.93	2387.56
25.8029	3341.93	2728.93	2031.86	2441.58	2391.59
25.8355	3341.97	2731.83	2032.34	2440.48	2389.45
25.8681	3334.93	2728.62	2026.59	2436.29	2388.31
25.9008	3335.44	2725.59	2027.26	2436.15	2386.83
25.9334	3333.61	2719.19	2028.29	2441.35	2387.25
25.9661	3332.98	2720.38	2024.8	2436.52	2382.57
25.9987	3336.25	2718.06	2023.32	2435.18	2380.65
26.0313	3334.63	2718.13	2026.33	2435.95	2380.22
26.064	3332.35	2718.17	2025.53	2433.27	2382.47
26.0966	3331.53	2716.73	2022	2432.72	2383.33
26.1292	3329.97	2716.73	2020.8	2433.04	2382.29
26.1619	3328.97	2717.39	2020.84	2431.8	2377.89
26.1945	3327.93	2715.62	2020.42	2429.43	2374.43
26.2272	3326.68	2711.9	2020.81	2423.81	2375.13
26.2598	3325.21	2710.11	2019.27	2422.24	2373.36
26.2924	3325.31	2707.61	2017.42	2423.8	2378.18
26.3251	3327.13	2708.73	2017.29	2421.78	2377.41
26.3577	3321.29	2703.13	2015.52	2421.77	2371.19
26.3903	3324.34	2705.04	2013.97	2418.74	2373.18
26.423	3315.44	2699.76	2013.29	2413.28	2367.91
26.4556	3315.46	2700.34	2014.04	2411.94	2369.78
26.4883	3315.39	2699.96	2015.59	2414.1	2369.81
26.5209	3312.03	2699.73	2011.66	2411.54	2367.01
26.5535	3311.76	2698.85	2010.66	2404.93	2365.37
26.5862	3307.62	2696.52	2010.52	2404.93	2362.62
26.6188	3307.77	2692.24	2009.62	2410.83	2366.82
26.6514	3299.3	2690.51	2007.99	2411.57	2365.27
26.6841	3300.68	2694.64	2007.49	2402.79	2362.07
26.7167	3298.29	2689.37	2006.45	2403.56	2362.21
26.7493	3295.49	2687.13	2006.28	2403.62	2361.32
26.782	3293.06	2684.91	2003.68	2409.96	2365.23
26.8146	3293.08	2683.6	2003.61	2402.74	2361.7
26.8473	3290.61	2684.34	2003.77	2401.43	2359.48
26.8799	3290.85	2682.52	1998.34	2400.89	2358.05
26.9125	3290.47	2680.17	2000.43	2398.41	2358.59
26.9452	3286.7	2674.59	1992.98	2398.77	2358.88
26.9778	3285.69	2675.19	1996.65	2398.22	2360.01
27.0104	3287.87	2675.47	1997.3	2400.65	2359.64
27.0431	3289.56	2676.13	1994.96	2397.86	2358.5
27.0757	3285.27	2675.79	1995.21	2394.63	2357.44
27.1084	3286.02	2675.31	1994.73	2389.78	2352.59
27.141	3283.74	2666.16	1993.67	2387.24	2356.79
27.1736	3287.3	2665.35	1991.27	2387.73	2356.67
27.2063	3278.4	2672.34	1994.32	2388.4	2356.58
27.2389	3276.78	2672.12	1992.12	2383.08	2354.18
27.2715	3279.75	2663.51	1988.26	2385.69	2349.42
27.3042	3276.34	2663.91	1987.13	2386.34	2347.84
27.3368	3273.98	2663.8	1987.82	2383.19	2350.44
27.3695	3273.69	2660.48	1987.89	2381.47	2346.34
27.4021	3271.93	2661.21	1985.05	2378.52	2349.86
27.4347	3270.42	2658.41	1981.91	2380.96	2350.47
27.4674	3272.48	2656.71	1981	2377.21	2349.44
27.5	3270.11	2652.57	1977.47	2378.34	2343.81
27.5326	3266.75	2654.46	1983.33	2375.34	2344.75
27.5653	3267.65	2651.06	1980.36	2376.55	2340.13
27.5979	3265	2655.71	1978.3	2371.55	2345.21
27.6305	3264.37	2652.88	1978.23	2367.3	2346.73
27.6632	3261.23	2649.84	1973.48	2370.27	2342.4
27.6958	3256.37	2646.96	1971.76	2370.96	2339.17
27.7285	3251.93	2649.06	1973.57	2367.55	2333.87
27.7611	3251.44	2643.75	1974.53	2364.78	2332.68
27.7937	3248.19	2646.07	1973.69	2364.17	2331.58
27.8264	3248.01	2647.42	1972.22	2359.69	2330.15
27.859	3246.94	2633.19	1969.2	2360.86	2332.54
27.8916	3253.08	2635.45	1966.36	2359.45	2331.29
27.9243	3253.22	2640.8	1971.99	2362.68	2322.62
27.9569	3251.56	2638.38	1967.39	2357.01	2328.18
27.9896	3247.02	2636.43	1964.58	2352.55	2329.66
28.0222	3246.61	2633.73	1967.05	2356.72	2329.99
28.0548	3251.07	2635.26	1968.21	2359.48	2324.98
28.0875	3241.1	2633.49	1969.39	2354.75	2326.73
28.1201	3245	2633.2	1964.62	2348.52	2329.71
28.1527	3240.97	2627.95	1965.65	2350.27	2322.93
28.1854	3242.31	2629.73	1958.66	2352.49	2320.29
28.218	3241.85	2626.52	1960.72	2349.23	2322.84
28.2507	3240.76	2623.89	1957.53	2344.7	2315.58
28.2833	3240.19	2625	1960.71	2347.53	2317.98
28.3159	3232.35	2624.01	1956.69	2343.45	2316.22
28.3486	3232.11	2624.49	1956.46	2343.09	2319.18
28.3812	3238.23	2622.31	1952.82	2342.83	2318.12
28.4138	3232.63	2618.48	1958.18	2343.59	2317.74
28.4465	3231	2622.96	1959.82	2337.41	2314.09
28.4791	3228.9	2620.03	1954.3	2341.8	2314.73
28.5117	3226.2	2612.97	1953.54	2338.91	2314.17
28.5444	3227.29	2610.7	1953.76	2333.45	2308.8
28.577	3221.7	2610.1	1955.22	2335.35	2310.2
28.6097	3219.51	2607.4	1949.04	2332.76	2311.89
28.6423	3220.42	2608.08	1948.93	2330.89	2309.45
28.6749	3216.72	2607.23	1949.05	2330.66	2307.32
28.7076	3213.82	2605.62	1950.12	2331.77	2306.53
28.7402	3217.3	2606.59	1947.62	2331.5	2307.55
28.7728	3220.74	2608.6	1942.15	2330.42	2308.63
28.8055	3209.9	2604.46	1945.8	2334.15	2305.92
28.8381	3205.63	2606.87	1946.7	2329.74	2302.21
28.8708	3213.15	2602.15	1943.26	2330.09	2307.37
28.9034	3212.92	2600.76	1942.56	2324.81	2307.13
28.936	3208.78	2599.91	1943.32	2327.8	2304.23
28.9687	3207.74	2599.04	1942.43	2320.92	2299.51
29.0013	3201.6	2599.47	1940.65	2320.49	2299.34
29.0339	3200.65	2596.63	1940.13	2318.44	2297.83
29.0666	3201.79	2593.25	1939.02	2320.49	2295.65
29.0992	3197.01	2594.01	1937.39	2318.79	2295.27
29.1319	3197.11	2591.64	1937.95	2317.46	2294.96
29.1645	3195.32	2591.29	1939.6	2317.52	2296.38
29.1971	3193.78	2588.11	1939.75	2313.93	2295.67
29.2298	3191.42	2586.04	1935.74	2310.09	2296.03
29.2624	3189.81	2580.2	1935.29	2309.27	2293.05
29.295	3191.25	2583.02	1932.66	2305.93	2290.47
29.3277	3188.04	2578.96	1929.45	2303.98	2292.34
29.3603	3187.99	2578.16	1930.89	2304.17	2289.09
29.393	3187.07	2582.03	1927.82	2308.87	2289.89
29.4256	3182.55	2576.45	1927.74	2306.29	2289.95
29.4582	3178.28	2574.59	1926.78	2305.28	2289.71
29.4909	3180.78	2574.46	1927.1	2302.42	2290.16
29.5235	3175.86	2575.06	1926.38	2304.24	2285.37
29.5561	3173.32	2572.4	1922.93	2298.14	2285.51
29.5888	3171.2	2576.83	1925.29	2303.06	2286.18
29.6214	3173.12	2571.03	1923.01	2299.57	2286.68
29.654	3170.26	2564.1	1923.19	2293.63	2282.91
29.6867	3168.17	2566.27	1922.86	2292.8	2280.57
29.7193	3167.91	2566.67	1926.08	2296.43	2278.56
29.752	3170.19	2563.85	1925.17	2293.05	2277.33
29.7846	3162.51	2564.51	1922.85	2288.26	2279.84
29.8172	3164.53	2564.04	1920.48	2285.83	2280.07
29.8499	3164.84	2561.65	1918.1	2288.54	2279.53
29.8825	3160.99	2557.86	1915.82	2291.64	2277.04
29.9151	3161.28	2554.72	1913.59	2288.33	2276.61
29.9478	3161.83	2553.77	1915.44	2281.55	2274.15
29.9804	3155.53	2554.74	1917.15	2280.47	2269.98
30.0131	3152.37	2554.92	1916.19	2282.81	2270.87
30.0457	3156.16	2552.45	1914.96	2282.1	2275.86
30.0783	3157.84	2548.96	1912.95	2278.54	2272.22
30.111	3155.61	2548.52	1913.06	2276.42	2266.87
30.1436	3153.44	2551.36	1914.16	2275.72	2269.08
30.1762	3154.56	2548.6	1913.34	2273.57	2266.04
30.2089	3153.12	2546.89	1912.32	2272.37	2266.32
30.2415	3157.72	2545.69	1909.16	2270.58	2265.87
30.2742	3152.79	2541.95	1908.65	2269.47	2261.92
30.3068	3152.53	2538.01	1913	2266.2	2265.38
30.3394	3150.62	2540.67	1909.38	2264.78	2263.07
30.3721	3156.82	2538.9	1911.84	2262.02	2261.85
30.4047	3144.77	2538.95	1906.45	2265.4	2261.52
30.4373	3142.8	2536.43	1906.34	2261.05	2259.35
30.47	3146.66	2539.88	1904.52	2261.78	2260.19
30.5026	3143.25	2534.87	1904.94	2266.07	2261.19
30.5352	3139.97	2533.82	1904.84	2261.98	2261.63
30.5679	3143.85	2531.62	1902.79	2262.98	2257.27
30.6005	3142.6	2529.78	1901.85	2256.56	2256.76
30.6332	3142.81	2529.2	1900.47	2255.23	2252.86
30.6658	3143.14	2524.1	1898.02	2259.09	2256.27
30.6984	3141.34	2524.34	1898.52	2259.14	2256.85
30.7311	3137.67	2527.25	1896.42	2253.45	2254.01
30.7637	3137.92	2524.68	1896.56	2253.97	2249.49
30.7963	3132.86	2524.78	1895.84	2251.64	2249.41
30.829	3128.36	2526.35	1892.28	2252.57	2249.21
30.8616	3131.41	2521.4	1896.45	2253.12	2250.46
30.8943	3128.13	2522.41	1894.51	2250.09	2243.64
30.9269	3128.45	2515	1890.43	2247.44	2244.31
30.9595	3127.56	2517	1892.71	2247.05	2245.58
30.9922	3126.8	2514.08	1891.42	2247.03	2244.92
31.0248	3126.92	2509.34	1890.56	2250.29	2243.97
31.0574	3128.78	2514.34	1892.07	2247.4	2243.66
31.0901	3127.55	2509.5	1893.42	2242.89	2244.25
31.1227	3122.33	2509.94	1888.6	2242.8	2242.66
31.1554	3122.64	2507.48	1887.98	2240.98	2241.35
31.188	3116.89	2506.95	1888.18	2238.15	2240.61
31.2206	3117.35	2508.09	1885.93	2237.02	2240.34
31.2533	3113.17	2503.51	1884.46	2238.6	2234.67
31.2859	3109.63	2502.64	1885.61	2237.21	2235.29
31.3185	3112.36	2502.65	1884.38	2233.35	2236.12
31.3512	3109.04	2502.8	1883.9	2230.75	2232.56
31.3838	3104.3	2499.94	1878.85	2231.51	2234.07
31.4164	3109.12	2496.07	1880.65	2231.12	2234.18
31.4491	3106.52	2496.48	1876.33	2233.02	2231.64
31.4817	3106.88	2496.53	1878.58	2229.21	2230.34
31.5144	3102.34	2495.24	1874.06	2225.78	2231.69
31.547	3096.89	2493.94	1874.96	2225.09	2229.54
31.5796	3095.36	2496.29	1875.33	2226.16	2232.44
31.6123	3098.98	2492.86	1873.36	2226.71	2228.28
31.6449	3087.45	2490.11	1873.32	2222.45	2232.06
31.6775	3091.27	2490.55	1872.7	2224.61	2226.96
31.7102	3091.19	2490.15	1872.28	2220.03	2227.82
31.7428	3091.72	2487.62	1870.72	2220.79	2224.51
31.7755	3093.08	2482.85	1870.48	2219.39	2229.92
31.8081	3089.66	2480.75	1869.84	2222.42	2222.97
31.8407	3088.08	2483.54	1871.98	2215.47	2227.28
31.8734	3084.11	2477.49	1871.39	2216.95	2224.64
31.906	3083.32	2478.69	1870.39	2215.01	2223.76
31.9386	3084.61	2477.58	1868.62	2209.17	2224.5
31.9713	3085.81	2475.46	1865.94	2213.61	2222.02
32.0039	3082.49	2476.47	1866.26	2214.11	2222.37
32.0366	3081.35	2475.8	1863.53	2214.32	2220.15
32.0692	3080.25	2471.12	1863.57	2210.17	2219.66
32.1018	3076.12	2472.87	1863.46	2205.65	2220.57
32.1345	3077.18	2473.73	1862.14	2207.63	2220.39
32.1671	3074.13	2473.34	1862.82	2208.47	2218.27
32.1997	3074.41	2470.39	1858.78	2206.38	2216.81
32.2324	3071.56	2463.64	1855.02	2199.33	2219.25
32.265	3065.57	2466.82	1859.13	2201.95	2216.53
32.2977	3071.01	2463.13	1857.1	2199.93	2220.32
32.3303	3070.02	2461.52	1856.49	2199.89	2214.01
32.3629	3067.89	2464.68	1855.94	2201.61	2212.95
32.3956	3065.52	2463.22	1853.89	2198.1	2209.32
32.4282	3064.93	2456.86	1852.5	2199.04	2207.42
32.4608	3059.5	2455.74	1848.59	2198.96	2207.86
32.4935	3056.73	2458.44	1848.54	2193.06	2205.88
32.5261	3056.61	2458.25	1845.87	2191.87	2207.03
32.5587	3054.97	2453.17	1846.76	2190.77	2211.9
32.5914	3050.91	2453.25	1847.12	2189.69	2210.42
32.624	3052.12	2453.38	1845.73	2192.14	2206.59
32.6567	3050.72	2448.75	1843.65	2191.05	2207.16
32.6893	3051.6	2448.9	1841.63	2189.26	2204.65
32.7219	3050.93	2452.97	1840.27	2187.6	2205.89
32.7546	3047.59	2452.62	1840.05	2187.7	2207.91
32.7872	3047.02	2449.6	1839.2	2185.5	2203.54
32.8198	3047.44	2447.11	1838.33	2180.96	2199.83
32.8525	3046.72	2443.07	1838.61	2181.38	2200.12
32.8851	3044.42	2440.05	1835.95	2183.45	2199.12
32.9178	3040.71	2440.64	1834.33	2183.08	2197.51
32.9504	3035.65	2440.73	1836.16	2181.62	2198.68
32.983	3037.83	2441.79	1835.98	2177.58	2195.3
33.0157	3036.81	2441.34	1835.23	2177.18	2192.51
33.0483	3036.75	2438.85	1830.56	2173.85	2192.91
33.0809	3034.83	2439.47	1834.7	2173.07	2193.18
33.1136	3034.7	2437.74	1831.31	2176.89	2187.5
33.1462	3030.45	2435.13	1831.28	2173.66	2188.7
33.1789	3028.8	2433.79	1833.3	2175.81	2188.14
33.2115	3028.49	2432.26	1830.62	2174.27	2187.12
33.2441	3027.35	2432.15	1829	2167.62	2191.88
33.2768	3024.3	2433.71	1830.92	2162.96	2189.19
33.3094	3024.83	2428.93	1830.93	2165.38	2187.69
33.342	3025.75	2428.08	1832.1	2165.89	2187.12
33.3747	3021.11	2424.52	1829.79	2164.02	2184.23
33.4073	3017.89	2423.27	1829.56	2165.12	2183.82
33.4399	3019.4	2421.88	1828.78	2166.01	2184.08
33.4726	3017.69	2421.99	1829.59	2166.15	2180.39
33.5052	3014.92	2421.03	1826.11	2160.55	2180.44
33.5379	3013.97	2418.29	1823.31	2159.51	2179.97
33.5705	3011.17	2416.65	1825.57	2156.45	2178.99
33.6031	3008.35	2416.29	1824.61	2159.59	2178.46
33.6358	3004.38	2414.66	1825.73	2152.32	2179.11
33.6684	3004.24	2414.64	1823.83	2150.92	2175.05
33.701	3002.92	2415.24	1822.97	2155.7	2174.28
33.7337	3002.64	2414.82	1820.72	2156.16	2170.67
33.7663	3002.94	2411.88	1821.28	2150	2171.08
33.799	3005.42	2413.67	1819.28	2150.91	2169.12
33.8316	3000.55	2410.19	1824.48	2150.25	2174.34
33.8642	2997.83	2411.67	1821.16	2147.9	2171.96
33.8969	2998.51	2408.08	1818.78	2148.39	2174.13
33.9295	2996	2402.41	1816.89	2148.07	2169.49
33.9621	2998.71	2402.14	1817.4	2144.16	2169
33.9948	2997.42	2401.48	1814.7	2141.3	2167.89
34.0274	2991.86	2401.74	1817.45	2145.52	2169.04
34.0601	2993.63	2399.06	1815.9	2144.98	2171.62
34.0927	2993.09	2400.88	1812.7	2141.7	2165.81
34.1253	2993.9	2401.11	1813.74	2139.64	2167.72
34.158	2988.57	2397.43	1815.54	2143.37	2162.92
34.1906	2985.77	2395.76	1812.66	2139.95	2165.01
34.2232	2988.07	2394.1	1809.55	2138.83	2162.77
34.2559	2982.84	2394.7	1809.63	2135.47	2163.59
34.2885	2978.62	2391.87	1809.2	2137.19	2156.35
34.3211	2979.41	2389.67	1808.88	2133.8	2160.04
34.3538	2973.42	2392.32	1810.53	2128.28	2160.84
34.3864	2977.61	2386.69	1805.31	2131.03	2160.2
34.4191	2971.7	2389.74	1806.82	2134.71	2157.35
34.4517	2976.17	2389.15	1804.23	2132.4	2155.2
34.4843	2976.06	2383.57	1802.64	2128.18	2158.15
34.517	2974.17	2384.15	1800.25	2123.73	2155.84
34.5496	2963.1	2384.96	1804.24	2122.71	2155.37
34.5822	2968.11	2381.58	1802.54	2123.57	2156.45
34.6149	2967.31	2381.7	1802.27	2125.28	2153.97
34.6475	2968.18	2382.6	1801.13	2128.03	2149.91
34.6802	2964.81	2379.56	1800.24	2128.55	2151.66
34.7128	2966.44	2376.25	1800.36	2129.88	2150.28
34.7454	2968.23	2380.59	1801.47	2126.26	2146.79
34.7781	2965.26	2378.37	1798.01	2122.6	2143.07
34.8107	2963.16	2376.59	1798.12	2121.33	2144.54
34.8433	2962.47	2373.97	1798.95	2118.21	2145.86
34.876	2960.15	2370.41	1795.8	2116.81	2146.56
34.9086	2960.17	2366.49	1795.06	2117.88	2143.78
34.9413	2956.31	2370.85	1793.93	2119.22	2142.23
34.9739	2954.05	2371.7	1792.2	2117.15	2142.98
35.0065	2951.82	2367.45	1793.4	2115.48	2141.03
35.0392	2950.4	2367.02	1792.12	2114.02	2139.99
35.0718	2949.79	2367.86	1789.04	2112.9	2141.6
35.1044	2948.28	2363.01	1790.72	2113.19	2141.35
35.1371	2943.9	2362.54	1791.28	2110.53	2140.15
35.1697	2942.93	2357.19	1789.8	2109.02	2140.77
35.2023	2942.07	2356.19	1789.02	2108.42	2139.5
35.235	2946.48	2360.46	1784.85	2107.63	2137.02
35.2676	2942.93	2362.42	1782.71	2106.5	2133.63
35.3003	2940.04	2357.06	1784.44	2105.54	2137.09
35.3329	2940.03	2356.1	1784.08	2101.81	2134.47
35.3655	2936.43	2353.03	1782.32	2101.55	2131.05
35.3982	2936.63	2353.21	1784.99	2100.13	2132.49
35.4308	2937.43	2353.04	1784.23	2097.87	2132.09
35.4634	2939.16	2353.07	1782.75	2097.58	2133.46
35.4961	2931.05	2351.56	1781.68	2097.13	2128.94
35.5287	2931.67	2344.66	1782.21	2093.86	2125.9
35.5614	2931.53	2348.22	1780.59	2094.54	2128.42
35.594	2929.77	2346.36	1779.04	2092.03	2126.03
35.6266	2928.26	2342.26	1772.02	2093.2	2125.38
35.6593	2923.66	2342.93	1772.6	2089.33	2125.9
35.6919	2930.86	2347.57	1772.82	2090.86	2124.86
35.7245	2929.26	2342.77	1771.07	2087.74	2126.63
35.7572	2925.33	2346.26	1771.79	2085.93	2121.6
35.7898	2924.05	2340.78	1773.15	2081.59	2119.27
35.8225	2920.21	2343.75	1769.5	2086.03	2118.91
35.8551	2925.07	2340.64	1770.63	2083.66	2116.83
35.8877	2916.72	2336.33	1768.07	2084.54	2121.24
35.9204	2913.58	2335.47	1771.06	2079.98	2119.59
35.953	2913.63	2335.57	1768.91	2082.19	2117.94
35.9856	2913.71	2336.54	1770.4	2084.06	2115.59
36.0183	2907.93	2329.65	1764.6	2079.46	2113.02
36.0509	2906.88	2331.33	1763.79	2077.76	2114.45
36.0836	2913.38	2332.23	1765.56	2076.86	2115.43
36.1162	2912.17	2325.77	1762.49	2079.59	2114.83
36.1488	2906.83	2325.33	1764.77	2078.18	2111.13
36.1815	2906.33	2322.23	1763.46	2074.89	2108.2
36.2141	2905.09	2321.58	1760.4	2071.84	2111.75
36.2467	2905.12	2322.66	1760.93	2073.46	2108.03
36.2794	2897.6	2320.38	1760.68	2073.14	2107.85
36.312	2900.29	2319.45	1759.68	2073.91	2106.22
36.3446	2901.8	2318.46	1758.85	2068.5	2107.47
36.3773	2902.55	2313.74	1757.24	2066.38	2107.21
36.4099	2902.22	2316.58	1753.83	2066.42	2107.23
36.4426	2896.92	2314.54	1754.26	2065.26	2106.67
36.4752	2893.87	2316.07	1759.99	2065.11	2105.98
36.5078	2895.23	2311.79	1753.51	2065.34	2106
36.5405	2892.15	2314.85	1752.49	2060.61	2097.25
36.5731	2892.94	2309.21	1753.05	2057.97	2101.36
36.6057	2888.23	2312.47	1753.34	2062.91	2104.66
36.6384	2891.27	2308.49	1752.11	2058.92	2101.11
36.671	2889.95	2304.91	1752.43	2062.01	2100.51
36.7037	2888.02	2302.42	1750.95	2061.11	2098.66
36.7363	2886.95	2303.56	1748.37	2057.35	2098.79
36.7689	2886.2	2303.63	1748.12	2055.62	2099.09
36.8016	2886.73	2303.45	1747.64	2054.45	2094.96
36.8342	2882.93	2300.25	1745.58	2052.34	2093.58
36.8668	2879.6	2299.71	1750.18	2054.11	2095.99
36.8995	2878.04	2299.75	1749.95	2050.78	2095.34
36.9321	2876.6	2299.04	1746.35	2047.28	2092.6
36.9648	2874.06	2296.08	1745.85	2051.39	2090.67
36.9974	2872.13	2297.73	1746.12	2050.91	2087.24
37.03	2870.69	2298.01	1745.08	2048.43	2086.93
37.0627	2868.69	2297.73	1740.7	2048.86	2088.8
37.0953	2872.32	2295.61	1739.22	2046.06	2089.76
37.1279	2873.63	2291.28	1740.85	2043.3	2087.27
37.1606	2870.41	2290.03	1739.55	2044.66	2085.35
37.1932	2868.75	2290.45	1738.5	2042.6	2085.79
37.2258	2864.9	2288.35	1737.82	2041.47	2084.57
37.2585	2863.25	2285.7	1737.4	2041.52	2082.88
37.2911	2863.08	2288.17	1737.49	2039.45	2082.31
37.3238	2863.74	2284.71	1736.03	2037.15	2084.32
37.3564	2860.08	2283.21	1734.59	2034.57	2081.92
37.389	2856.75	2283.58	1733.02	2035.1	2079.59
37.4217	2861.01	2280.3	1733.5	2034.54	2079.11
37.4543	2860.38	2280.85	1730.56	2033.36	2081.55
37.4869	2856.43	2280.15	1730.14	2031.71	2080.01
37.5196	2854.49	2276.81	1731.69	2030.97	2076.46
37.5522	2855.48	2274.32	1731.42	2030.53	2075.4
37.5849	2853.55	2271.95	1730.4	2029.65	2077.22
37.6175	2851.66	2272.61	1730.45	2028.62	2077.24
37.6501	2848.58	2269.91	1729.89	2027.25	2074.51
37.6828	2849.7	2269.47	1729.5	2024.98	2071.74
37.7154	2847.91	2268.52	1728.33	2021.9	2070.2
37.748	2850.2	2268.64	1728.75	2019.31	2070.92
37.7807	2846.08	2267.48	1728.22	2020.48	2067.56
37.8133	2843.4	2264.97	1726.28	2020.62	2069.52
37.846	2843.56	2264.99	1725.18	2019.64	2067.39
37.8786	2836.13	2263.02	1725.44	2019.83	2064.05
37.9112	2834.75	2259.17	1726.56	2019.55	2061
37.9439	2834.75	2266.44	1725.72	2020.04	2065.21
37.9765	2835.13	2265.77	1725.51	2018.41	2063.21
38.0091	2833.32	2260.69	1721.08	2018.18	2061.09
38.0418	2833.66	2260.33	1720.5	2018	2059.73
38.0744	2828.37	2259	1719.33	2017.43	2061.68
38.107	2827.72	2260.35	1718.16	2014.24	2061.36
38.1397	2829.82	2254.56	1715.08	2013.8	2060.31
38.1723	2830.08	2252.34	1713.97	2016.94	2059.06
38.205	2830.73	2253.6	1712.11	2013.66	2059.25
38.2376	2825.87	2255.15	1708.98	2010.06	2057.59
38.2702	2820.63	2249.64	1714.41	2011.1	2055.48
38.3029	2818.49	2245.55	1713.57	2010.59	2052.48
38.3355	2822.57	2248.49	1711.57	2006.89	2054.39
38.3681	2822.05	2248.1	1709.73	2007.05	2054.3
38.4008	2822.12	2247.51	1707.16	2004.71	2055.38
38.4334	2819.01	2247.25	1706.83	2002.84	2052.83
38.4661	2814.68	2240.7	1707.88	2005.1	2051.64
38.4987	2816.84	2239.9	1704.36	2004.84	2049.24
38.5313	2813.97	2243.48	1711.32	2001.58	2046.42
38.564	2813.74	2243.34	1706.89	1996.75	2047.06
38.5966	2809.1	2238.28	1706.95	1995.94	2043.46
38.6292	2809.89	2236.4	1703.63	1998.35	2046.25
38.6619	2808.83	2238.81	1705.9	1999.09	2045.36
38.6945	2808.16	2232.78	1701.48	2000.85	2043.02
38.7272	2803.54	2233.2	1701.05	1995.14	2039.83
38.7598	2799.62	2232.83	1700.34	1989.78	2038.67
38.7924	2802.92	2233.73	1700.72	1994.25	2041.89
38.8251	2801.7	2228.56	1700.77	1991.27	2036.11
38.8577	2801.39	2229.07	1695.26	1993.82	2035.53
38.8903	2798.72	2226.38	1695.64	1991.71	2035.47
38.923	2799.88	2224.62	1692.99	1987.2	2039.98
38.9556	2801.09	2221.54	1693.68	1987.09	2032.97
38.9883	2796.39	2227.19	1696.24	1986.72	2037.56
39.0209	2795.29	2224.77	1698.09	1984.16	2033.43
39.0535	2794.4	2223.16	1693.18	1984.55	2033.42
39.0862	2793.19	2221.13	1693.49	1982.7	2029.7
39.1188	2790.19	2221.93	1693.02	1986.83	2034.65
39.1514	2793.4	2217.15	1690.33	1987.4	2033.78
39.1841	2792.08	2219.69	1690.45	1981.78	2031.35
39.2167	2788.61	2216.68	1688.3	1984.23	2027.03
39.2493	2787.46	2218.69	1692.21	1981.93	2030.84
39.282	2784.84	2219.75	1687.79	1983.4	2032.16
39.3146	2782.12	2214.13	1688.39	1980.3	2026.35
39.3473	2778.78	2212.88	1686.05	1982.07	2027.75
39.3799	2778.24	2213.11	1687.54	1980.07	2019.46
39.4125	2776.57	2209.75	1687.72	1977.51	2020.79
39.4452	2772.65	2210.8	1688.81	1975.9	2025.5
39.4778	2774.66	2208.59	1686.94	1974.05	2025.76
39.5104	2773.44	2213.02	1684.23	1974.7	2024.85
39.5431	2770.51	2209.07	1683.93	1972.91	2022.04
39.5757	2769.56	2204.62	1681.96	1974.23	2021.65
39.6084	2766.17	2204.82	1681.64	1972.22	2019.99
39.641	2766.62	2202.44	1679.52	1968.1	2018.57
39.6736	2766.08	2202.05	1681.81	1969.06	2017.64
39.7063	2764.25	2201.96	1680.27	1967.27	2017.98
39.7389	2763.23	2198.13	1676.53	1966.31	2014.58
39.7715	2760.22	2201.69	1674.22	1967.21	2017.15
39.8042	2757.83	2197.48	1674.39	1963.98	2016.14
39.8368	2754.96	2196.32	1672.97	1964.82	2012.9
39.8695	2753.74	2197.25	1673.88	1963.95	2009.22
39.9021	2746.33	2193.6	1674.31	1961.19	2012.99
39.9347	2751.84	2192.02	1673.29	1960.75	2013.99
39.9674	2757.34	2193.27	1672.12	1960.39	2010.96
40	2750.33	2196.37	1670.91	1957.07	2008.85
40.0326	2748.34	2193.37	1671.65	1953.01	2009.85
40.0653	2747.62	2192.78	1671.42	1953.39	2011.19
40.0979	2746.74	2191.56	1669.05	1954.09	2009.3
40.1305	2745.19	2195.08	1669.53	1950.89	2009.35
40.1632	2746.57	2197.09	1668.08	1949.13	2005.45
40.1958	2745.48	2188.85	1665.17	1951.45	2005.02
40.2285	2745.68	2185.33	1662.47	1950.39	2001.51
40.2611	2745.39	2183.2	1666.8	1950.87	2003.09
40.2937	2746.19	2181.11	1664.52	1946.33	1999.99
40.3264	2741.5	2178.5	1662.63	1945.6	2003.39
40.359	2737.62	2180.32	1661.61	1944.41	2000.32
40.3916	2738.72	2182.37	1664.93	1944.02	2003.88
40.4243	2739.78	2176.75	1662.25	1941.33	2002.06
40.4569	2736.91	2175.72	1662.26	1942.49	1998.74
40.4896	2736.28	2170.52	1660.39	1940.87	1995.63
40.5222	2735.44	2171.79	1662.26	1943.27	1998.2
40.5548	2735	2171.16	1658.43	1943.94	1997.21
40.5875	2734.87	2174.11	1658.63	1939.85	1994.37
40.6201	2734.47	2169.79	1655.17	1937.06	1992.63
40.6527	2728.06	2169.78	1659.45	1936.22	1996.65
40.6854	2727.62	2167.64	1656.65	1937.9	1991.39
40.718	2724.62	2164.88	1653.01	1937.45	1990.65
40.7507	2727.06	2162.32	1654.36	1935.98	1988.92
40.7833	2724.03	2163.87	1653.61	1933.87	1990.07
40.8159	2720	2165.08	1648.13	1931.61	1986.62
40.8486	2724.9	2163.23	1652.43	1929.35	1989.04
40.8812	2721.05	2160.47	1649.4	1929.3	1983.79
40.9138	2720.6	2158.76	1651.4	1931.2	1987.14
40.9465	2720.95	2157.75	1648.37	1927.31	1985.49
40.9791	2718.05	2154.82	1649.88	1928.1	1983.09
41.0117	2713.53	2152.3	1650.89	1928.36	1980.8
41.0444	2709.31	2153.99	1647.18	1924.87	1981.87
41.077	2705.1	2153.99	1645.52	1925.36	1981.6
41.1097	2701.04	2152.22	1645.41	1925.46	1977.55
41.1423	2707.08	2151.24	1643.76	1919.08	1974.62
41.1749	2704.83	2152.92	1643.14	1917.88	1975.69
41.2076	2703.45	2149.39	1641.95	1918.11	1976.7
41.2402	2703.82	2143.63	1638.35	1918.3	1977.56
41.2728	2708.28	2145.57	1642.23	1919.36	1974.03
41.3055	2703.57	2146.87	1638.52	1914.14	1973.43
41.3381	2699.33	2145.46	1639.82	1917.49	1974.32
41.3708	2698.14	2145.26	1637.54	1913.79	1971.56
41.4034	2697.38	2140.82	1639.15	1913.68	1971.69
41.436	2697.32	2139.49	1638.36	1912.97	1965.98
41.4687	2695.15	2143.96	1636.85	1911.98	1970.32
41.5013	2697.01	2142.34	1634.33	1909.28	1967.18
41.5339	2691.09	2136.79	1636.33	1908.93	1971.11
41.5666	2690.08	2132.91	1637.59	1904.88	1968.09
41.5992	2686.62	2138.03	1633.35	1905.69	1964.51
41.6319	2686.87	2133.63	1633.43	1904.97	1960.15
41.6645	2684.22	2135.08	1633.64	1906.65	1966.03
41.6971	2685.37	2133.37	1631.81	1902.73	1961.33
41.7298	2680.31	2131.66	1631.31	1904.87	1966.29
41.7624	2679.91	2128.43	1629.35	1904.02	1962.99
41.795	2679.12	2128.91	1629.48	1899.82	1965.04
41.8277	2672.9	2128.38	1628.66	1899.54	1963.22
41.8603	2678.09	2128.56	1627	1901.9	1958.5
41.893	2670.2	2130.15	1624.3	1900.05	1959.35
41.9256	2672.47	2126.89	1622.06	1895.73	1960.02
41.9582	2671.71	2125.21	1624.28	1892.26	1959.73
41.9909	2668.37	2124.49	1621.05	1894.32	1954.15
42.0235	2664.66	2124.85	1619.14	1896.61	1955.3
42.0561	2669.77	2121.5	1622.15	1897.07	1952.96
42.0888	2671.05	2120.91	1623.8	1890.54	1954.2
42.1214	2665.84	2116.73	1617.05	1893.54	1951.5
42.154	2663.2	2114.1	1618.9	1893.03	1951.53
42.1867	2661.08	2115.11	1619.1	1890.56	1948.68
42.2193	2663.54	2112.43	1618.72	1889.11	1949.64
42.252	2659.92	2113.38	1616.14	1886.22	1948.37
42.2846	2659.7	2110.13	1616.34	1885.86	1946.57
42.3172	2654.58	2112.33	1614.96	1887.09	1946.41
42.3499	2655.47	2108.02	1613.26	1885.47	1948.12
42.3825	2656.36	2107.37	1614.77	1882.71	1943.78
42.4151	2655.96	2108.76	1611.03	1880.3	1940.9
42.4478	2651.38	2104.11	1614	1882.59	1942.91
42.4804	2651.53	2101.6	1611.26	1883.11	1943.19
42.5131	2648.72	2104.08	1612.1	1881.11	1939.01
42.5457	2648.17	2102.25	1609.01	1877.51	1940.91
42.5783	2648.66	2102.64	1609.42	1876.79	1941.18
42.611	2647.33	2100.84	1609.99	1874.96	1939.1
42.6436	2648.17	2099.43	1606.98	1876.33	1936.81
42.6762	2647.09	2097.44	1602.83	1874.09	1937.71
42.7089	2646.33	2094.57	1605.57	1873.66	1938.2
42.7415	2644.23	2095.23	1605.99	1871.79	1934.54
42.7742	2644.07	2095.38	1601.96	1870.3	1935.44
42.8068	2641.39	2090.3	1600.38	1869.89	1932.81
42.8394	2643.85	2090.86	1610.22	1862.98	1932.57
42.8721	2640.68	2091.02	1604.88	1865	1930.84
42.9047	2639.24	2089.82	1604.52	1864.67	1930.25
42.9373	2636.03	2087.57	1602.96	1864.93	1927.87
42.97	2633.95	2085.32	1604.16	1861.33	1927.46
43.0026	2631.53	2083.35	1602.42	1862.66	1927.07
43.0352	2627.93	2086.47	1598.94	1864.39	1925.99
43.0679	2627.21	2082.07	1600.48	1864.48	1918.69
43.1005	2622.43	2085.08	1600.33	1862.53	1922.41
43.1332	2620.84	2083.3	1599.26	1857.27	1923.18
43.1658	2623.94	2079.83	1600.32	1859.34	1920.39
43.1984	2623.9	2076.47	1597.04	1856.44	1920.22
43.2311	2623.48	2074.34	1597.19	1858.69	1918.62
43.2637	2623.1	2072.81	1594.22	1855.41	1918.78
43.2963	2618.59	2076.63	1594.78	1858.74	1916.4
43.329	2614.96	2071.88	1590.58	1854.04	1913.12
43.3616	2616.08	2072.94	1592.07	1853.8	1917.92
43.3943	2615.14	2068.86	1590.7	1849.12	1915.1
43.4269	2608.12	2065.14	1587.4	1850.47	1917.31
43.4595	2608.63	2063.08	1587.8	1848.25	1913.37
43.4922	2615.6	2066.74	1584.43	1851.2	1909.62
43.5248	2613.64	2063.82	1583.64	1847.22	1908.21
43.5574	2608.82	2060.99	1584.6	1845.15	1907.55
43.5901	2607	2062.27	1584.58	1844.95	1905.22
43.6227	2608.28	2059.91	1583.31	1845.18	1908.38
43.6554	2606.22	2061.04	1585.07	1840.43	1905.57
43.688	2605.16	2057.77	1583.37	1844.29	1904.97
43.7206	2602.43	2055.6	1578.62	1842.02	1905.3
43.7533	2602.5	2056.92	1579.75	1840.2	1901.9
43.7859	2599.89	2056.22	1581.61	1839.51	1901.68
43.8185	2598.04	2055.03	1581.68	1842.05	1901.35
43.8512	2594.39	2055.15	1579.24	1840.29	1900.26
43.8838	2588.75	2051.38	1578.3	1837.3	1901.24
43.9164	2587.44	2052.04	1576.71	1835.59	1902.05
43.9491	2585.05	2054.42	1576.83	1835.22	1901.26
43.9817	2584.67	2052.11	1577.49	1834.74	1899.54
44.0144	2587.56	2050.12	1575.86	1835.01	1896.24
44.047	2589.39	2050.54	1575.87	1833.21	1894.15
44.0796	2588.89	2051.18	1574.16	1832.18	1896.06
44.1123	2585.18	2047.75	1571.51	1828.89	1896.25
44.1449	2579.48	2046.46	1570.41	1827.62	1893.16
44.1775	2580.47	2044.08	1570	1827.53	1893.17
44.2102	2579.61	2043.19	1570.49	1827.48	1893.34
44.2428	2577.68	2041.17	1568.64	1825.4	1891.96
44.2755	2575.2	2040.86	1566.58	1820.71	1892.23
44.3081	2575.14	2038.46	1565.9	1821.04	1891.81
44.3407	2572.69	2037.04	1565.33	1819.27	1892.75
44.3734	2572.56	2036.91	1563.01	1819.43	1890.39
44.406	2570.4	2038.91	1562.83	1822.43	1889.42
44.4386	2567	2036.6	1563.3	1821.65	1888.02
44.4713	2567.61	2032.97	1564.27	1819.81	1883.71
44.5039	2564.64	2034.38	1561.08	1818.33	1883.47
44.5366	2563.61	2032.88	1558.65	1817.3	1884.79
44.5692	2565.45	2030.16	1559.37	1815.18	1884.64
44.6018	2563.49	2028.33	1556.63	1812.96	1882.35
44.6345	2561.91	2027.21	1558.69	1811.8	1879.8
44.6671	2558.34	2024.77	1555.61	1806.87	1876.58
44.6997	2557.97	2027.99	1558.94	1806.96	1878.13
44.7324	2552.71	2028.93	1556.8	1805.24	1876.63
44.765	2557.89	2025.88	1552.47	1807.57	1875.32
44.7977	2554.78	2023.9	1552.76	1806.47	1871.13
44.8303	2554.07	2023.24	1554.2	1803.6	1874.47
44.8629	2552.29	2020.81	1551.71	1803.6	1870.05
44.8956	2547.75	2019.47	1551.96	1803.03	1876.42
44.9282	2543.11	2013.45	1552.19	1797.4	1873.57
44.9608	2548.99	2014.31	1550.04	1801.42	1872.07
44.9935	2543.72	2014.8	1546.4	1800.89	1871.01
45.0261	2545.17	2012.19	1548.06	1798.37	1870.14
45.0587	2544.44	2009.9	1548.09	1794	1866.99
45.0914	2538.51	2008.95	1547.31	1796.06	1865.13
45.124	2540.13	2006.56	1542.63	1789.36	1864.5
45.1567	2534.42	2011.84	1549.51	1792.48	1863.23
45.1893	2535.48	2008.68	1543.52	1789.53	1864.99
45.2219	2534.52	2002.04	1544.74	1790.61	1865.23
45.2546	2531.16	2000.12	1540.65	1786.32	1861.94
45.2872	2529.95	2001.47	1542.37	1789	1862.12
45.3198	2529.24	1997.44	1543.56	1786.53	1858.7
45.3525	2530.02	2002.34	1539.91	1783.75	1857.82
45.3851	2528.89	1998.48	1538	1781.98	1854.39
45.4178	2527.8	1993.95	1539.59	1787.75	1858.33
45.4504	2524.69	1993.69	1538.33	1785.08	1854.67
45.483	2526.6	1991.43	1537.92	1785.27	1852.52
45.5157	2525.95	1993.08	1538.53	1782.35	1847.96
45.5483	2520.8	1990.65	1534.8	1781.61	1850.86
45.5809	2522.94	1991.99	1532.89	1778.25	1851.5
45.6136	2517.75	1991.28	1534.97	1779.22	1851.22
45.6462	2516.84	1987.86	1530.73	1776.18	1847.91
45.6789	2509.83	1985.62	1535.52	1774.93	1853.18
45.7115	2513.82	1981.35	1532	1773.12	1849
45.7441	2511.88	1983.17	1532.98	1774.89	1850.08
45.7768	2510.27	1980.74	1527.6	1773.03	1845.93
45.8094	2513.59	1983.51	1528.16	1776.15	1848.65
45.842	2508.33	1979.89	1528	1769.43	1844.62
45.8747	2509.28	1980.81	1527.74	1766.5	1847.1
45.9073	2506.15	1977.75	1524.74	1765.59	1846.86
45.9399	2499.96	1977.37	1526.64	1766.79	1843.05
45.9726	2498.89	1973.11	1525.28	1764.33	1841.94
46.0052	2498.87	1976.98	1522.82	1768.37	1847.33
46.0379	2496.8	1970.5	1519.77	1761.43	1843.18
46.0705	2497.22	1976.35	1521.15	1762.89	1841.73
46.1031	2493.38	1972.62	1517.23	1760.44	1839.38
46.1358	2499.03	1973.8	1522.67	1761.42	1836.23
46.1684	2494.11	1970.47	1520.51	1760.07	1836.08
46.201	2492.46	1970.35	1520.39	1761.37	1834.34
46.2337	2489.07	1965.89	1516.97	1755.64	1833.02
46.2663	2485.12	1964.95	1515.21	1752.06	1833.74
46.299	2485.28	1963.17	1514.83	1752.59	1832.11
46.3316	2484.45	1960.89	1513.54	1752.57	1828.25
46.3642	2478.62	1961.23	1513.16	1748.51	1828.75
46.3969	2475.24	1960.27	1512.79	1749.75	1828.38
46.4295	2477.94	1956.33	1511.4	1753.57	1824.65
46.4621	2475.58	1954.28	1510.4	1751.57	1824.46
46.4948	2472.81	1955.38	1510.15	1750.02	1825.11
46.5274	2471.34	1955.29	1509.18	1749.91	1826.17
46.5601	2469.64	1951.48	1506.57	1750.4	1823.64
46.5927	2471.33	1947.97	1506.79	1750.1	1820.67
46.6253	2470.51	1948.06	1507.93	1748.86	1821.28
46.658	2466.19	1947.56	1507.14	1747.53	1819.14
46.6906	2463.46	1947.3	1508.01	1747.48	1819.03
46.7232	2458.76	1948.2	1504.59	1746.78	1819.9
46.7559	2461.97	1945.18	1499.92	1743.04	1819.11
46.7885	2460.75	1941.71	1500.51	1740.15	1819.03
46.8211	2459.88	1940.61	1500.76	1736.37	1816.43
46.8538	2457.67	1942.33	1500.33	1733.34	1813.7
46.8864	2454.6	1941.17	1499.7	1736.48	1813.17
46.9191	2452.87	1938.94	1498.38	1735.67	1815.11
46.9517	2451.5	1936.26	1496.98	1732.59	1811.97
46.9843	2449.16	1935.51	1495.56	1729.22	1808.41
47.017	2446.56	1934.02	1495.4	1727.06	1808.88
47.0496	2441.9	1932.3	1494	1726.5	1805.38
47.0822	2443.24	1930.14	1493.83	1726.74	1805.48
47.1149	2444.21	1928.18	1493.13	1724.51	1803.46
47.1475	2442.26	1926.52	1491.73	1724.02	1803.81
47.1802	2440.3	1925.23	1489.61	1722.63	1803.62
47.2128	2441.57	1925.89	1490.81	1724.5	1801.41
47.2454	2440.3	1922.27	1490.96	1721.09	1801.68
47.2781	2437.72	1922.49	1490.9	1718.14	1801.82
47.3107	2437.36	1921.29	1488.11	1717.91	1798.09
47.3433	2435.04	1923.63	1487.46	1716.89	1799.51
47.376	2429.97	1917.49	1484.34	1716.04	1796.81
47.4086	2433.38	1916.79	1483.34	1715.65	1794.92
47.4413	2430.51	1910.57	1480.95	1710.97	1796.86
47.4739	2429.85	1912.28	1480.5	1712.18	1795.36
47.5065	2427.87	1914.48	1481.57	1709.71	1790.5
47.5392	2425.72	1911.16	1481.05	1711.57	1790.61
47.5718	2420.9	1907.65	1477.69	1708.59	1786.41
47.6044	2419.32	1907.5	1476.73	1708.22	1786.78
47.6371	2416.36	1906.25	1475.33	1710.25	1785.75
47.6697	2416.05	1905.54	1475.88	1705.5	1786.13
47.7023	2414.36	1903.23	1474.81	1699.67	1783.53
47.735	2412.31	1904.53	1476.12	1699.41	1779.74
47.7676	2407.31	1904.6	1474.5	1698.56	1774.89
47.8003	2411.67	1897.05	1475.03	1704.75	1783.97
47.8329	2409.41	1894.91	1474.7	1699.16	1778.67
47.8655	2404.53	1898.17	1473.17	1701.26	1778.84
47.8982	2405.17	1893.34	1474.81	1697.99	1774.15
47.9308	2406.71	1892.6	1472.95	1701.45	1776.68
47.9634	2402.8	1891.98	1470.52	1695.24	1772.3
47.9961	2402.65	1894.52	1465.96	1700.09	1772.43
48.0287	2399.35	1892.76	1467.11	1693.75	1771.18
48.0614	2399.49	1892.9	1467.08	1695.07	1772.45
48.094	2396.76	1888.94	1464.64	1689.16	1771.48
48.1266	2396.28	1888.36	1465.9	1692.66	1770.1
48.1593	2394.22	1887.47	1465.63	1688.97	1767.84
48.1919	2391.59	1887.17	1462.89	1688.53	1764.56
48.2245	2389.7	1883.41	1462.93	1687.18	1765.47
48.2572	2393.98	1884.36	1460.42	1683.72	1767.25
48.2898	2391.27	1883.06	1459.91	1683.55	1763.3
48.3225	2384.14	1881.58	1457.7	1684.33	1763.09
48.3551	2383.78	1877.88	1457.5	1683.52	1761.19
48.3877	2385.43	1878.38	1460.24	1679.76	1763.11
48.4204	2384.01	1878.28	1457.69	1678.52	1758.48
48.453	2386.86	1876.27	1456.02	1677.35	1756.92
48.4856	2381.08	1873.35	1452.59	1678.92	1756.19
48.5183	2380.75	1871.7	1453.92	1679.05	1755.74
48.5509	2380.6	1869.62	1452.43	1677.44	1755.25
48.5836	2376.83	1868.19	1450.02	1675.52	1754.83
48.6162	2373.87	1867	1450.61	1671.69	1753.03
48.6488	2373.43	1868.7	1449.42	1669.7	1750.84
48.6815	2369.83	1866.64	1448.22	1671.13	1748.82
48.7141	2368.68	1864.95	1446.2	1670.95	1746.42
48.7467	2370.61	1863.03	1444.63	1670.67	1745.62
48.7794	2370.31	1857.53	1444.13	1671.69	1745.32
48.812	2363.27	1858.71	1445.43	1671.36	1746.09
48.8446	2361.05	1855.45	1445.09	1670.13	1744.77
48.8773	2362.03	1859.15	1440.32	1666.22	1739.93
48.9099	2357.37	1856.95	1442.06	1666.05	1738.38
48.9426	2355.97	1857.08	1441.13	1667.25	1739.81
48.9752	2355.89	1853.25	1433.74	1666.11	1735.4
49.0078	2352.63	1854.95	1440.64	1661.73	1738.38
49.0405	2347.64	1852.3	1434.27	1665.22	1734.43
49.0731	2353.65	1850.4	1438.73	1662.88	1731.69
49.1057	2353.49	1848.08	1435.12	1662.56	1731.65
49.1384	2348.1	1849.31	1438.16	1661.73	1729.09
49.171	2348	1849.24	1434.46	1656.6	1730.68
49.2037	2344.24	1847.65	1435.92	1659	1728.83
49.2363	2347.25	1847.11	1433.67	1657.59	1730.74
49.2689	2340.72	1843.09	1430.94	1658.09	1728.23
49.3016	2341.39	1843.46	1428.05	1655.27	1724.19
49.3342	2339.95	1845.56	1430.82	1656.62	1727.38
49.3668	2332.27	1841.97	1427.73	1654.73	1727.21
49.3995	2336.78	1841.34	1425.28	1651.85	1721.71
49.4321	2338.37	1838.68	1425.44	1651.08	1720.82
49.4648	2334.33	1838.77	1426.74	1650.42	1722.17
49.4974	2330.85	1834.2	1424.69	1646.33	1717.08
49.53	2331.66	1839.07	1423.77	1645.57	1720.62
49.5627	2329.71	1836.72	1421.49	1643.83	1715.9
49.5953	2331.62	1835.91	1425.52	1645.63	1718.89
49.6279	2328.87	1832.64	1423.09	1642.45	1715.02
49.6606	2328.15	1830.72	1421.44	1646.84	1716.49
49.6932	2323.75	1827.74	1419.17	1640.5	1712.03
49.7258	2323.68	1826.09	1417.81	1641.91	1711.92
49.7585	2322.56	1827.87	1417.11	1637.22	1706.17
49.7911	2321.16	1825.29	1417.66	1640.29	1708.93
49.8238	2319.47	1823.44	1414.96	1637.67	1708.05
49.8564	2318.37	1824.28	1415.93	1635.51	1708.07
49.889	2316.77	1821.85	1413.26	1633.49	1707.08
49.9217	2317.14	1822.66	1411.87	1637.84	1705.55
49.9543	2313.71	1821.38	1409.25	1631.07	1702.53
49.9869	2320.51	1821.25	1409.57	1631.39	1701.49
50.0196	2315.54	1818.08	1409.22	1631.08	1701.39
50.0522	2310.85	1813.44	1412.11	1633.39	1702.24
50.0849	2307.65	1814.57	1408.83	1628.6	1700.14
50.1175	2312.73	1818.87	1409.39	1631.1	1695.1
50.1501	2309.27	1816.6	1406.97	1626.96	1694.55
50.1828	2304.3	1814.89	1407.8	1626.65	1697.48
50.2154	2304.22	1812.57	1406.49	1623.42	1693.58
50.248	2305.18	1814.5	1408.55	1622.66	1691.66
50.2807	2304.88	1809.94	1402.01	1624.06	1687.56
50.3133	2299.82	1811.83	1407.5	1619.3	1690.11
50.346	2300.35	1809.88	1401.9	1621.59	1686.66
50.3786	2304.34	1809.44	1403.36	1623.94	1683.43
50.4112	2301.61	1808.71	1401.8	1619.15	1682.56
50.4439	2300.55	1806.49	1401.64	1617.3	1689.04
50.4765	2296.47	1803.93	1401.46	1619.47	1683.65
50.5091	2300.15	1806.49	1396.09	1621.79	1682.56
50.5418	2295.04	1802.83	1397.13	1620.21	1681.79
50.5744	2299.76	1800.95	1396.51	1621.02	1680.57
50.607	2293.39	1798.75	1394.59	1617.26	1678.38
50.6397	2293.74	1803.43	1389.58	1613.45	1680.63
50.6723	2289.28	1800.97	1393.95	1612.26	1677.8
50.705	2290.65	1803.72	1390.41	1613.56	1678.3
50.7376	2288.85	1802.14	1394.13	1612.02	1675.15
50.7702	2284.8	1796.22	1393.96	1611.14	1673.59
50.8029	2284.19	1795	1394.1	1613.46	1673.19
50.8355	2282.66	1794.38	1391.86	1616.85	1676.56
50.8681	2281.23	1794.62	1388.45	1610.91	1667.22
50.9008	2285.21	1791.83	1385.79	1613.87	1671.23
50.9334	2283.02	1790.57	1384.53	1611.38	1669.8
50.9661	2286.44	1791.8	1383.78	1614.09	1667.47
50.9987	2282.03	1789.64	1383.42	1612.96	1666.52
51.0313	2281.68	1794.09	1386.43	1608.62	1665.75
51.064	2277.87	1792.08	1382.44	1607.39	1662.59
51.0966	2280.56	1794.34	1383.49	1609.12	1664.03
51.1292	2275.45	1790.72	1380.67	1606.27	1661.97
51.1619	2278.12	1786.96	1379.53	1607.01	1659.05
51.1945	2273.92	1785.6	1379.35	1607.23	1657.11
51.2272	2272.72	1788.61	1378.9	1606.38	1659.16
51.2598	2270.65	1788.06	1379.63	1604.89	1656.33
51.2924	2272.21	1790.82	1380.03	1605.62	1655.15
51.3251	2267.43	1785.01	1378.34	1605.14	1654.97
51.3577	2268.26	1778.31	1379.38	1603.58	1655.22
51.3903	2265.72	1779.25	1377.81	1599.7	1651.59
51.423	2264.16	1785.32	1377.39	1603.87	1653.23
51.4556	2261.97	1783.85	1375.3	1604.41	1652.98
51.4883	2266.24	1779.94	1370.16	1604.04	1653.37
51.5209	2264.24	1779.82	1369.47	1602.51	1648.77
51.5535	2260.26	1780.94	1370.76	1601.48	1644.37
51.5862	2260.37	1781.83	1370.39	1602.93	1649.75
51.6188	2258.9	1780.07	1369.05	1599.23	1649.6
51.6514	2260.27	1778.01	1366.84	1597.79	1646.92
51.6841	2257.99	1774.58	1367.72	1597.51	1645.29
51.7167	2252.97	1774.08	1368.7	1593.84	1646.9
51.7493	2251.33	1774.32	1368.76	1591.75	1646.2
51.782	2250.82	1775.39	1370.81	1593.29	1644.03
51.8146	2247.41	1771.75	1367.56	1589.71	1642.46
51.8473	2245.28	1770.77	1365.89	1591.78	1639.91
51.8799	2245.72	1766.76	1366.51	1591.09	1638.38
51.9125	2244.61	1769.14	1363.18	1593.34	1640.46
51.9452	2242.63	1767.09	1360.85	1594.14	1636.59
51.9778	2244.74	1771.52	1361.45	1594.16	1638.23
52.0104	2242.34	1768.58	1360.01	1591.45	1638.1
52.0431	2236.92	1767.3	1359.35	1590.74	1638.71
52.0757	2239.98	1764.43	1357.89	1585.55	1636.15
52.1084	2240.81	1765.49	1357.14	1587.89	1635.15
52.141	2241.05	1766.05	1354.52	1585.88	1634.88
52.1736	2235.01	1762.11	1353.28	1584.09	1635.37
52.2063	2233.46	1759.52	1349.91	1584.02	1633.17
52.2389	2232.51	1762.57	1354.85	1583.5	1631.32
52.2715	2233.77	1762.05	1356.61	1581.04	1630.45
52.3042	2236	1758.26	1352.41	1580.9	1631.3
52.3368	2234.4	1757.49	1348.79	1576.92	1627.95
52.3695	2235.75	1762.16	1351.67	1578.23	1627.58
52.4021	2234.11	1758.28	1349.05	1576	1627.74
52.4347	2230.68	1759.98	1351.5	1578.69	1628.18
52.4674	2230.96	1755.13	1348.18	1578.7	1622.25
52.5	2229.8	1758.77	1348.46	1572.93	1626.9
52.5326	2229.5	1755.38	1346.42	1572.94	1623.27
52.5653	2226.21	1751.36	1344.64	1573.17	1624.97
52.5979	2219.75	1749.13	1343.42	1567.87	1620.98
52.6305	2223.28	1756.3	1346.79	1573.38	1620.55
52.6632	2220.45	1756.46	1347.78	1570.88	1620.52
52.6958	2219.52	1752.73	1346.12	1568.82	1617.98
52.7285	2213.67	1751.47	1345.38	1570.88	1615.46
52.7611	2214.17	1752.24	1345.67	1570.74	1615.29
52.7937	2211.37	1746.2	1342.11	1570.82	1609.69
52.8264	2212.45	1747.93	1341.01	1567.66	1611.5
52.859	2214.28	1745.28	1342.31	1563.99	1611.81
52.8916	2211.18	1746.87	1342.75	1570.18	1615.42
52.9243	2210.12	1741.93	1342.35	1569.28	1610.54
52.9569	2211.14	1741.53	1341.2	1568.98	1609.52
52.9896	2208.22	1739.55	1340.94	1566.04	1607.75
53.0222	2207.48	1740.51	1339.45	1569.86	1612.4
53.0548	2207.12	1737.05	1335.36	1566.9	1610.76
53.0875	2205.07	1738.05	1336.37	1562.14	1604.89
53.1201	2201.37	1736.21	1336.87	1559.32	1604.03
53.1527	2202.5	1735	1336.57	1559.11	1608.46
53.1854	2200.13	1734.14	1335.97	1557.84	1606.59
53.218	2199.09	1736.65	1336.32	1558.03	1609.03
53.2507	2194.06	1735.67	1334.4	1554.03	1605.23
53.2833	2197.33	1734.44	1334.13	1553.71	1600.04
53.3159	2194.43	1734.29	1332.31	1550.4	1599.66
53.3486	2193.28	1729.91	1331.92	1553.29	1601.52
53.3812	2192.51	1729.5	1329.3	1551.53	1598.44
53.4138	2188.57	1730.64	1335.61	1551.35	1592.56
53.4465	2185.55	1732.2	1332.73	1548.47	1592.47
53.4791	2190.11	1727.52	1332.57	1547.04	1598.62
53.5117	2190.15	1727.6	1329.11	1545.58	1601.15
53.5444	2188.54	1731.25	1327.21	1544.47	1596.67
53.577	2185.67	1727.05	1326.42	1546.67	1593.27
53.6097	2184.9	1729.15	1324.87	1547.76	1594.85
53.6423	2181.42	1727.81	1322.51	1543.62	1594.9
53.6749	2185.13	1722.78	1325.88	1541.5	1593.96
53.7076	2181.81	1719.29	1327.36	1540.36	1592.81
53.7402	2179.83	1719.67	1327.97	1541.55	1592.92
53.7728	2179.74	1721.14	1325.13	1542.18	1590.91
53.8055	2177.44	1719.56	1320.79	1539.74	1588.4
53.8381	2177.92	1719.7	1318.64	1540.29	1588.31
53.8708	2177.88	1718.28	1318.35	1540.26	1586.78
53.9034	2175.01	1713.33	1318.84	1536.31	1585.95
53.936	2173.19	1711.32	1315.85	1536.09	1585.05
53.9687	2172.69	1714.82	1317.9	1538.83	1584.2
54.0013	2169.4	1713.7	1317.06	1535.92	1584
54.0339	2171.56	1710.88	1316.01	1535.96	1585.01
54.0666	2174.53	1708.06	1313.73	1533.79	1582.62
54.0992	2168.2	1708.61	1313.72	1531.73	1583.28
54.1319	2166.99	1708.31	1313.75	1533.26	1583.07
54.1645	2168.17	1704.7	1316.26	1534.2	1580.91
54.1971	2168.5	1702.74	1315.44	1533.83	1578.94
54.2298	2165.53	1706.28	1312.69	1530.05	1579.52
54.2624	2165.93	1702.1	1310.58	1530.76	1572.24
54.295	2165.06	1705.19	1310.47	1529.17	1578.08
54.3277	2165.66	1704.43	1308.42	1527.64	1575.95
54.3603	2168.97	1704.05	1311.6	1530.55	1574.63
54.393	2166.96	1697.63	1309.38	1526.21	1571.47
54.4256	2160.46	1700.97	1306.56	1527.45	1577.09
54.4582	2158.28	1700.66	1307.83	1523.76	1577.38
54.4909	2157.28	1699.38	1310.4	1525.5	1574.02
54.5235	2154.33	1696.2	1310.02	1524.44	1567.16
54.5561	2154.94	1696.79	1306	1521.08	1564.74
54.5888	2152.58	1693.56	1302.84	1517.25	1561.49
54.6214	2149	1692.69	1305.72	1521.97	1569.94
54.654	2151.26	1691.6	1303.37	1515.79	1567.61
54.6867	2152.81	1695.25	1304.37	1520.27	1567.83
54.7193	2153.4	1691.34	1302.85	1517.64	1564.94
54.752	2149.32	1689.11	1303.59	1520.16	1561.65
54.7846	2148.19	1689.86	1299.03	1514.44	1558.3
54.8172	2149.39	1689.53	1303.04	1518.2	1565.65
54.8499	2145.95	1685.87	1301.83	1515.42	1559.03
54.8825	2147.2	1686.22	1303.49	1516.37	1562.44
54.9151	2143.63	1687.4	1302.49	1509.77	1557.1
54.9478	2139.85	1687.2	1299.36	1513.32	1561.26
54.9804	2139.02	1683.74	1298.09	1512.99	1556.23
55.0131	2137.33	1684.13	1297.08	1512.82	1559.3
55.0457	2136.59	1685.38	1296.43	1507.3	1558.2
55.0783	2137.33	1681.98	1296.44	1509.08	1558.38
55.111	2139.84	1679.49	1293.12	1503.38	1553.69
55.1436	2135.76	1679.22	1295.91	1512.57	1555.06
55.1762	2135.45	1677.48	1295.03	1506.88	1553.26
55.2089	2130.99	1681.89	1292.76	1508.33	1553.91
55.2415	2129.71	1680.21	1293.46	1505.76	1548.15
55.2742	2131.1	1675.83	1293.66	1511.3	1555.09
55.3068	2134.06	1675.03	1292.18	1503.87	1552.14
55.3394	2128.45	1675.33	1292.71	1506.64	1549.89
55.3721	2129.7	1673.04	1289.77	1506.15	1548.19
55.4047	2126.42	1672.28	1290.86	1503.64	1549.94
55.4373	2123.91	1672.89	1286.14	1501.98	1546.14
55.47	2120.79	1675.14	1290.86	1506.65	1549.9
55.5026	2120.33	1672.27	1289.15	1501.58	1548.48
55.5352	2123.6	1672.98	1288.01	1502.16	1546.12
55.5679	2122.41	1670.09	1284.76	1500.32	1543.82
55.6005	2120.02	1667	1284.77	1502.69	1544.24
55.6332	2117.98	1666.08	1284.83	1499.33	1542.79
55.6658	2120.78	1669.64	1283.58	1499.14	1543.98
55.6984	2117.7	1666.75	1281.51	1498.46	1541.99
55.7311	2115.08	1667.09	1280.19	1497.01	1538.3
55.7637	2114.92	1664.15	1278.76	1496.24	1537.68
55.7963	2112.72	1661.77	1281.16	1496.71	1538.42
55.829	2109.6	1660.79	1283.16	1494.89	1537.7
55.8616	2108.8	1660.72	1282.8	1493.98	1536.06
55.8943	2110.74	1660.06	1281.53	1491.92	1534.85
55.9269	2111.87	1658.17	1278.96	1489.37	1535.28
55.9595	2107.39	1659.1	1278.51	1491.65	1534.23
55.9922	2105.02	1659.55	1278.47	1492.14	1533.4
56.0248	2104.66	1658.91	1277.1	1491.7	1535.03
56.0574	2103.12	1655.68	1276.47	1489.12	1532.16
56.0901	2106.09	1657.85	1276.51	1487.43	1531.39
56.1227	2105.37	1655.69	1275.88	1485.28	1531.58
56.1554	2101.47	1653.62	1276.57	1487.03	1529.87
56.188	2096.33	1650.1	1273.75	1487.9	1528.3
56.2206	2099.75	1651.68	1272.51	1487.54	1529.64
56.2533	2096.88	1649.95	1269.91	1484.58	1527.5
56.2859	2097.15	1652.81	1272.2	1484.73	1527.25
56.3185	2091.94	1649.42	1269.89	1481.31	1525.68
56.3512	2098.07	1650.82	1272.09	1481	1527.71
56.3838	2093.19	1649.61	1268.22	1478.52	1522.03
56.4164	2092.59	1649.24	1271.41	1481.57	1528.53
56.4491	2094.35	1645.74	1265.26	1481.65	1520.25
56.4817	2093.52	1645.58	1267.77	1480.09	1522.48
56.5144	2091.74	1646.96	1263.99	1478.5	1520.76
56.547	2088.96	1647.53	1267.77	1479.8	1517.51
56.5796	2091.16	1646.07	1265.24	1477.5	1515.43
56.6123	2088.74	1648.57	1264.3	1475.83	1519.78
56.6449	2087.23	1643.14	1264.98	1474.81	1516.54
56.6775	2086.8	1640.89	1264.03	1472.52	1516.95
56.7102	2083.55	1640.55	1262.58	1471.52	1517.39
56.7428	2085.31	1643.58	1264.45	1476.23	1515.57
56.7755	2085.04	1639.26	1261.54	1474.75	1514.58
56.8081	2080.78	1638.08	1264.85	1473.69	1513.92
56.8407	2078.13	1635.23	1261.37	1472.58	1510.6
56.8734	2079.92	1642.05	1260.54	1473.74	1513.09
56.906	2078.72	1637.68	1258.66	1471.29	1512.28
56.9386	2073	1637.57	1258.69	1469.22	1511.56
56.9713	2075.9	1636.4	1256.49	1470.26	1508.77
57.0039	2074.88	1634.07	1256.45	1465.74	1513.82
57.0366	2077.04	1633.11	1257.64	1466.57	1509.96
57.0692	2073.05	1633.04	1257.32	1467.13	1507.1
57.1018	2071.04	1629.71	1256.34	1466.59	1506.13
57.1345	2073.14	1631.38	1255.43	1467.71	1504.81
57.1671	2070.84	1629.22	1252.58	1465.27	1503.27
57.1997	2071.99	1631.05	1252	1466.89	1504.09
57.2324	2067.51	1627.8	1252.61	1464.6	1503.34
57.265	2066.82	1625.72	1255.3	1461.59	1505.13
57.2977	2064.27	1625.62	1251.98	1462.79	1503.63
57.3303	2062.65	1625.57	1249.9	1464.19	1503.47
57.3629	2066.45	1624.95	1250.12	1462.94	1501.96
57.3956	2067.06	1624.92	1246.68	1460.9	1497.34
57.4282	2062.45	1624.62	1247.07	1460.78	1496.27
57.4608	2061.77	1622.83	1249.5	1461.21	1495.01
57.4935	2057.62	1620.36	1246.59	1459.15	1497.09
57.5261	2058.38	1618.18	1244.57	1458.44	1496.35
57.5587	2058.75	1619.81	1247.39	1457.17	1497.82
57.5914	2053.93	1616.61	1244.27	1455.24	1498.1
57.624	2053.97	1617.51	1243.51	1458.94	1493.49
57.6567	2049.74	1616.91	1242.16	1459.6	1492.52
57.6893	2054.86	1614.5	1243.08	1453.7	1493.01
57.7219	2056.06	1613.26	1241.17	1449.1	1490.66
57.7546	2052.76	1614.01	1242.29	1450.47	1488.67
57.7872	2050.38	1611.97	1237.87	1448.5	1488.84
57.8198	2049.61	1613.42	1242.03	1444.76	1494.14
57.8525	2054.04	1610.41	1238.44	1447.12	1489.63
57.8851	2046.34	1610.55	1242.15	1450.84	1488.3
57.9178	2045.17	1611.35	1238.03	1445.44	1482.39
57.9504	2046.26	1610.48	1239.37	1447.22	1486.85
57.983	2043.84	1608.73	1240.63	1440.68	1486.77
58.0157	2040.2	1608.19	1238.57	1443.9	1483.72
58.0483	2039.26	1605.96	1234.5	1439.25	1484.31
58.0809	2040.84	1604.44	1239.09	1448.02	1484.68
58.1136	2040.29	1602.93	1236.55	1440.88	1482.98
58.1462	2037.3	1604.54	1234.51	1441.59	1480.69
58.1789	2034.52	1604.68	1232.42	1438.57	1479.49
58.2115	2035.92	1607.24	1233.27	1440.56	1485.59
58.2441	2034.28	1602.02	1232.33	1436.73	1479.62
58.2768	2032.6	1600.4	1229.75	1439.6	1477.57
58.3094	2032.36	1599.39	1229.11	1436.03	1478.31
58.342	2028.38	1598.47	1231.56	1439.71	1474.46
58.3747	2030.22	1595.32	1226.13	1435.48	1473.32
58.4073	2030.5	1599.45	1232.93	1438.08	1476.51
58.4399	2025.25	1598.9	1230.17	1438.52	1471.66
58.4726	2030.19	1597.31	1232.22	1435.71	1474.85
58.5052	2028.03	1595.69	1228.76	1433.21	1471.84
58.5379	2021.33	1594.81	1227.77	1431.99	1471.7
58.5705	2022.18	1592.72	1221.9	1429.17	1471
58.6031	2024.17	1591.84	1224.91	1432.19	1467.25
58.6358	2026.83	1590.02	1224.71	1430.73	1465.97
58.6684	2023.75	1595.15	1223.33	1428.69	1470.41
58.701	2018.95	1590.46	1224.19	1425.38	1467.91
58.7337	2024.18	1590.87	1225.91	1428.25	1466.85
58.7663	2020.95	1587.63	1222.94	1426.65	1467.19
58.799	2021.47	1589.41	1224.45	1425.43	1468.48
58.8316	2018.25	1586.09	1221.63	1423.8	1464.14
58.8642	2011.36	1586.7	1221.23	1425.79	1463.66
58.8969	2009.85	1583.88	1220.74	1421.9	1460.86
58.9295	2011.96	1584.03	1221.7	1420.46	1462.42
58.9621	2012.06	1580.93	1218.61	1417.67	1460.2
58.9948	2013.61	1584.12	1220.61	1417.75	1460.56
59.0274	2009.59	1580.58	1218.88	1417.63	1459.9
59.0601	2009.08	1582.9	1219.95	1418.46	1457.09
59.0927	2008.81	1581.14	1216.01	1417.36	1456.18
59.1253	2005.7	1581.38	1217.27	1419.41	1459.5
59.158	2002.71	1579.13	1217.06	1417.74	1457.79
59.1906	2004.99	1582.33	1215.84	1414.27	1455.86
59.2232	2004.87	1580.5	1215.46	1414.17	1456.59
59.2559	2002.53	1579.88	1215.84	1411.22	1457.54
59.2885	1999.42	1578.22	1214.7	1410.18	1456.41
59.3211	1997.99	1577.27	1213.49	1411.05	1453.98
59.3538	2000.88	1575.6	1213.32	1410.15	1453.36
59.3864	1999.05	1573.79	1211.53	1410.16	1452.91
59.4191	1996.05	1574.95	1209.65	1409.72	1451.62
59.4517	1994.86	1571.92	1209.89	1408.19	1452.23
59.4843	1992.21	1571.1	1209.99	1405.32	1451.5
59.517	1990.72	1572.1	1210.09	1403.11	1450.32
59.5496	1992.28	1570.53	1209.16	1402.79	1449.64
59.5822	1989.49	1569.56	1208.27	1404.73	1447.25
59.6149	1986.63	1568.62	1207.79	1403.13	1445.88
59.6475	1983.54	1565.54	1206.51	1402.02	1444.9
59.6802	1982.34	1562.91	1204	1403.84	1444.73
59.7128	1985.29	1563.36	1201.45	1402.1	1444.45
59.7454	1987.77	1562.98	1203.36	1400.45	1442.69
59.7781	1985.2	1558.11	1201.58	1399.38	1441.03
59.8107	1983	1561.97	1199.94	1399.3	1439.38
59.8433	1982.73	1560.23	1201.12	1398.77	1436.53
59.876	1984.12	1559.4	1201.08	1398.02	1436.28
59.9086	1982.53	1557.81	1200.92	1395.9	1436.18
59.9413	1980.68	1556.67	1200.12	1397.05	1437.89
59.9739	1980.75	1556.18	1198.06	1395.79	1437.43
60.0065	1980.45	1558.69	1199.45	1395.48	1437.77
60.0392	1975.75	1558.47	1195.74	1392.14	1433.12
60.0718	1975.81	1556.02	1195.16	1393.41	1431.44
60.1044	1971.82	1551.86	1194.71	1390.11	1431.75
60.1371	1973.21	1553.11	1195.08	1392.66	1432.84
60.1697	1973.16	1550.36	1194.66	1389.53	1430.52
60.2023	1970.52	1551.38	1195.11	1390.92	1428.99
60.235	1969.33	1549.47	1189.72	1390.14	1425.85
60.2676	1968.41	1553.74	1192.17	1390.05	1431.47
60.3003	1965.22	1551.32	1189.34	1389.76	1429.2
60.3329	1962.33	1551.04	1191.99	1388.28	1427.93
60.3655	1960.14	1551.87	1189.7	1385.4	1426.11
60.3982	1965.1	1550.51	1191.46	1386.02	1427.72
60.4308	1964.03	1548.37	1190.44	1383.17	1424.5
60.4634	1960.99	1547.18	1188.44	1385.55	1423.41
60.4961	1958.9	1544.72	1186.5	1382.01	1423.62
60.5287	1958.64	1545.04	1186.54	1384.98	1423.08
60.5614	1954.45	1543.3	1183.14	1384.45	1420.34
60.594	1957.48	1544.14	1186	1380.46	1420.55
60.6266	1955.41	1538.53	1185.04	1379.86	1420.39
60.6593	1956.23	1545.17	1186.26	1382.86	1420.71
60.6919	1952.02	1541.11	1183.42	1377.85	1417.14
60.7245	1955.12	1539.96	1181	1379.09	1417.76
60.7572	1954.23	1538.24	1178.09	1377.82	1415.66
60.7898	1952.71	1541.51	1183.94	1377.99	1416.82
60.8225	1951.95	1537.97	1179.21	1375.02	1413.06
60.8551	1949	1536.66	1182	1375.05	1411.95
60.8877	1947.3	1536.4	1181.66	1375.6	1411.09
60.9204	1944.34	1538.08	1178.99	1376.16	1413.68
60.953	1946.73	1537.57	1180	1373.7	1413.94
60.9856	1943.53	1536.91	1177.89	1373.16	1407.56
61.0183	1940	1534.3	1178.08	1374.03	1410.99
61.0509	1942.8	1533.41	1176.99	1375.12	1410.88
61.0836	1939.67	1530.61	1176.28	1372.19	1411.09
61.1162	1940.47	1529.61	1176.13	1368.12	1409.74
61.1488	1936.48	1528.34	1175.65	1369.34	1407.02
61.1815	1938.68	1528.93	1172.5	1366.98	1407.62
61.2141	1936.43	1525.66	1172.28	1367.47	1405.2
61.2467	1936.26	1527.6	1174.94	1366.19	1404.28
61.2794	1931.11	1525.56	1174.02	1366.44	1402.64
61.312	1932.28	1528.45	1172.09	1367.47	1403.85
61.3446	1929.19	1524.28	1169.75	1366.4	1399.67
61.3773	1932.35	1528.36	1170.41	1366.39	1404.52
61.4099	1929.39	1524.35	1167.4	1361.49	1399.31
61.4426	1924.17	1524.26	1169.67	1360.05	1399.21
61.4752	1921.66	1521.45	1169.16	1359.02	1397.32
61.5078	1929.44	1520.51	1171.85	1360.59	1398.68
61.5405	1929.84	1518.59	1165.25	1359.5	1393.91
61.5731	1926.35	1518.93	1168.54	1359.29	1398.66
61.6057	1921.1	1517.32	1163.73	1356.85	1393.19
61.6384	1922.49	1517.38	1164.1	1357.13	1398.77
61.671	1922.84	1515.14	1162.73	1355.42	1395.39
61.7037	1921.99	1519.35	1165.53	1360.45	1392.57
61.7363	1922.28	1515.2	1162.89	1353.1	1388.93
61.7689	1918.44	1517.06	1163.32	1352.91	1392.21
61.8016	1917.43	1513.63	1162.07	1352.09	1390.87
61.8342	1915.88	1515.32	1162.18	1354.01	1393.08
61.8668	1914.97	1511.51	1159.2	1350.36	1388.25
61.8995	1916.44	1513.5	1162.56	1352.79	1391.83
61.9321	1913.3	1510.19	1161.51	1349.96	1388.01
61.9648	1914.42	1514.81	1160.8	1352.16	1387.91
61.9974	1909.65	1510.2	1159.35	1349.02	1386.91
62.03	1914.58	1509.37	1158.2	1349.06	1386.57
62.0627	1914.27	1505.78	1157.03	1347.84	1382.14
62.0953	1908.68	1505.96	1156.19	1347.93	1384.99
62.1279	1906.39	1506.22	1156.42	1344.02	1382.13
62.1606	1912.08	1504.45	1156.28	1343.74	1381.86
62.1932	1906.64	1501.33	1154.56	1344.74	1380.25
62.2258	1901.22	1499.88	1153.97	1346.68	1380.34
62.2585	1901.93	1498.56	1153.41	1344.64	1380.59
62.2911	1903.46	1498.51	1151.65	1341.35	1378.26
62.3238	1901.64	1496.38	1151.47	1339.75	1378.42
62.3564	1899.24	1493.83	1152.47	1340.04	1378.38
62.389	1898.57	1495.61	1151.43	1341.65	1376.25
62.4217	1896.91	1493.9	1149.27	1339.43	1374.76
62.4543	1895.46	1495.7	1148.78	1338	1375.55
62.4869	1896.51	1493.94	1148.59	1335.32	1373.56
62.5196	1900.14	1493.92	1148.44	1337.43	1371.65
62.5522	1899.13	1489.87	1144.88	1334.03	1368.71
62.5849	1895.55	1489.71	1147.1	1336.31	1370.62
62.6175	1893.15	1488.64	1142.94	1335.13	1366.13
62.6501	1893.37	1492.52	1144.63	1335.1	1370.8
62.6828	1887.35	1490.51	1140.33	1330.92	1367.33
62.7154	1888.19	1492.38	1143.84	1331.15	1367.04
62.748	1882.47	1492.73	1144.53	1331.09	1365.85
62.7807	1887.31	1487.52	1142.4	1331.36	1366.57
62.8133	1884.29	1484.06	1142.2	1329.29	1361.91
62.846	1882.73	1486.41	1139.71	1325.99	1365.59
62.8786	1882.09	1483.09	1139.01	1325.91	1364.2
62.9112	1883.5	1485.59	1142.6	1327.97	1363.32
62.9439	1882.49	1483.28	1139.15	1324.15	1358.06
62.9765	1881.63	1483.04	1141.98	1326.94	1361.54
63.0091	1878.74	1479.43	1137.5	1321.88	1357.66
63.0418	1877.03	1482.72	1138.66	1325	1363.77
63.0744	1875.98	1477.44	1136.44	1324.11	1360.27
63.107	1875.79	1478.53	1133.95	1322.54	1357.98
63.1397	1875.6	1475.19	1133.57	1321.63	1355.49
63.1723	1873.94	1481.69	1135.73	1318.74	1358.9
63.205	1872.27	1476.62	1134.11	1317.35	1355.58
63.2376	1871.09	1478.58	1134.17	1319.54	1357.94
63.2702	1870.84	1473.93	1131.88	1317.38	1352.59
63.3029	1870.05	1473.22	1135.95	1320.86	1355.15
63.3355	1867	1468.58	1130.39	1318.75	1349.46
63.3681	1868.37	1471.25	1134.03	1318.49	1351.27
63.4008	1867.35	1468.65	1128.65	1315.28	1351.8
63.4334	1863.55	1474.73	1131.18	1312.32	1354.06
63.4661	1863.8	1471.03	1129.75	1312.24	1349.51
63.4987	1865.53	1467.41	1128.31	1314.27	1348.13
63.5313	1862.07	1465.07	1127.34	1310.81	1346.64
63.564	1855.92	1465.4	1126.86	1311.07	1345.39
63.5966	1856.93	1465.08	1124.89	1309.14	1343.58
63.6292	1857.83	1463.62	1126.82	1310.54	1343.17
63.6619	1857.45	1462.41	1125.43	1309.53	1344.4
63.6945	1857.03	1461.62	1123.61	1307.24	1343.62
63.7272	1855.77	1460.66	1123.49	1308.6	1343.49
63.7598	1855.1	1459.95	1122.44	1307.2	1342
63.7924	1852.14	1460.22	1123.05	1306.98	1341.28
63.8251	1851.01	1459.14	1121.74	1306.07	1342.72
63.8577	1851.44	1456.32	1119.81	1304.24	1340.27
63.8903	1850.07	1459.72	1118.72	1305.14	1339.77
63.923	1849.06	1459.93	1117.71	1305.66	1338.46
63.9556	1848.43	1455.03	1116.61	1304.92	1337.02
63.9883	1846.12	1456.89	1117.83	1305.65	1337.02
64.0209	1842.76	1452.29	1114.75	1302.18	1331.34
64.0535	1844.5	1453.23	1118.44	1302.17	1334.09
64.0862	1844.29	1453.22	1114.36	1301.71	1330.91
64.1188	1840.91	1452.8	1115.63	1299.79	1333.35
64.1514	1839.12	1450.39	1111.89	1293.86	1330.58
64.1841	1844.43	1450.61	1114.08	1300.95	1333.22
64.2167	1843.61	1445.73	1109.72	1300.54	1329.28
64.2493	1841.11	1449.84	1113.87	1296.07	1331.6
64.282	1838.13	1447.21	1111.83	1296.82	1326.68
64.3146	1839.11	1446.09	1111.84	1292.68	1329.32
64.3473	1838.27	1443.82	1111.24	1295.32	1326.77
64.3799	1838.25	1445.86	1114.43	1293.99	1328.43
64.4125	1836.41	1443.7	1107.83	1291.77	1325.16
64.4452	1837.2	1443.87	1108.12	1291.95	1326.83
64.4778	1835.96	1441.57	1106.18	1288.5	1324.02
64.5104	1831.78	1442.25	1110.78	1292.12	1325.09
64.5431	1830.01	1441.48	1108.35	1288.6	1319.65
64.5757	1826.12	1439.68	1108	1286.55	1324.2
64.6084	1826.13	1439.86	1104.53	1286.62	1319.3
64.641	1826.72	1438.66	1106.99	1288.72	1318.62
64.6736	1823	1435.19	1105.03	1288.5	1317.83
64.7063	1825.34	1437.41	1105.94	1289.52	1321.63
64.7389	1823.52	1434.46	1103.09	1285.45	1317.56
64.7715	1822.02	1434.87	1103.85	1285.9	1317.36
64.8042	1817.58	1432.06	1103.18	1284.34	1315.43
64.8368	1820.89	1434.57	1105.94	1288.86	1317.2
64.8695	1816.96	1432.63	1099.27	1285.52	1311.65
64.9021	1820.64	1432.26	1103.91	1287.34	1317.07
64.9347	1817.49	1433	1102.18	1279.62	1312.42
64.9674	1816.94	1432.63	1100.54	1279.06	1313.15
65	1812.03	1430.65	1099.8	1277.69	1311.4
65.0326	1812.88	1426.47	1098.67	1281.89	1307.68
65.0653	1808.68	1425.7	1096.85	1279.25	1306.39
65.0979	1805.59	1427	1095.22	1278.79	1305.53
65.1305	1803.98	1423.61	1094.64	1278.51	1304.59
65.1632	1811	1425.44	1096.28	1279.46	1304.42
65.1958	1808.46	1422.44	1094.27	1276.91	1304.39
65.2285	1807.11	1425.29	1094.44	1278.14	1305.13
65.2611	1805.77	1422.8	1093.84	1279.09	1303
65.2937	1807.29	1421.1	1093.61	1278.07	1302.92
65.3264	1806.32	1424.35	1090.96	1275.75	1302.12
65.359	1803.51	1425.87	1088.05	1274.1	1301.41
65.3916	1801.11	1419.97	1090.03	1271.67	1303.7
65.4243	1799.6	1416.66	1090.2	1268.78	1301.04
65.4569	1799.85	1415.86	1090.28	1270.02	1300.57
65.4896	1795.45	1415.37	1087.66	1264.1	1300.77
65.5222	1796.25	1416.16	1086.25	1268.46	1300.7
65.5548	1797.86	1415.08	1084	1266.23	1297.59
65.5875	1795.72	1417.34	1086.38	1267.02	1298.47
65.6201	1795.83	1416.09	1082.29	1264.39	1296.47
65.6527	1792.59	1412.92	1088.12	1262.3	1297.62
65.6854	1789.47	1412.59	1084.07	1259.07	1298.68
65.718	1788.49	1411.49	1084.56	1262.59	1297.8
65.7507	1790.53	1413.4	1081.48	1258.91	1292.73
65.7833	1790.04	1410.43	1083.58	1259.76	1296.41
65.8159	1786.16	1405.6	1081.09	1258.61	1291.91
65.8486	1789.67	1408.63	1082.26	1261.52	1292.51
65.8812	1784.51	1406.14	1078.64	1258.72	1288.27
65.9138	1783.44	1408.78	1078.67	1256.86	1288.03
65.9465	1783.42	1407.52	1075.27	1256.91	1284.28
65.9791	1781.85	1406.08	1079.29	1256.68	1287.08
66.0117	1782.16	1404.12	1076.58	1255.57	1285.36
66.0444	1781.07	1403.1	1078.64	1254.85	1286.85
66.077	1781.01	1401.79	1076.15	1249.99	1280.56
66.1097	1777.43	1402.12	1077.02	1256.53	1287.3
66.1423	1776.73	1400.48	1075.93	1250.02	1282.65
66.1749	1778.46	1401.79	1077.89	1254.12	1284.28
66.2076	1774.72	1400.08	1075.03	1249.38	1281.69
66.2402	1776.25	1396.06	1074.38	1251.84	1283.58
66.2728	1774.51	1395.46	1071.86	1248.78	1281.51
66.3055	1773.63	1396.54	1072.1	1249.85	1282.23
66.3381	1773.05	1396.16	1069.12	1247.81	1279.51
66.3708	1767.4	1392.58	1072.88	1244.89	1277.3
66.4034	1764.86	1390.92	1070.91	1245.88	1277.77
66.436	1769.27	1393.5	1073.09	1246.18	1277.43
66.4687	1765.78	1390.54	1071.02	1245.2	1276.84
66.5013	1764.85	1393.29	1070.38	1242.78	1276.3
66.5339	1764.6	1392.37	1066.11	1239.01	1276.24
66.5666	1763.86	1390.03	1066.34	1244.65	1275.18
66.5992	1762.47	1389.69	1065.8	1239.84	1272.94
66.6319	1760.87	1388.38	1065.15	1240.56	1272.01
66.6645	1760.03	1386.61	1063.03	1239.78	1270.13
66.6971	1762.59	1387.93	1066.36	1239.11	1276.21
66.7298	1761.18	1385.28	1064.11	1235.91	1271.83
66.7624	1755.8	1382.61	1064.85	1240.99	1268.35
66.795	1754.8	1379.87	1060.58	1236.85	1268.38
66.8277	1755.06	1381.88	1063.19	1235.34	1267.48
66.8603	1753.73	1379.08	1060.68	1234.27	1264.86
66.893	1753.14	1382.93	1063.24	1236.5	1268.13
66.9256	1753.35	1381.54	1060.68	1233.55	1268.19
66.9582	1753.16	1381.65	1059.78	1230.51	1267.9
66.9909	1750.75	1380.05	1059.01	1229.53	1266.43
67.0235	1748.33	1380.4	1057.67	1229.48	1265.32
67.0561	1745.42	1379	1056.01	1227.56	1264.07
67.0888	1743.82	1378	1055.14	1228.26	1264.05
67.1214	1744.58	1378.31	1055.73	1228.29	1262.93
67.154	1744.5	1378.54	1055.09	1226.93	1260.77
67.1867	1742.79	1375.38	1053.28	1226.05	1257.2
67.2193	1744.14	1373.1	1053.19	1225.33	1256.33
67.252	1743.81	1373.41	1052.12	1223.18	1257.38
67.2846	1742.12	1373.45	1051.38	1220.35	1256.03
67.3172	1739.94	1370.94	1052.74	1221.62	1253.55
67.3499	1735.76	1368.78	1053.64	1222.6	1255.93
67.3825	1736.22	1368.58	1051.68	1221.05	1255.86
67.4151	1737.08	1367.94	1049.58	1221.79	1252.86
67.4478	1734.09	1369.62	1049.39	1221.08	1252.6
67.4804	1729.73	1369.18	1048.33	1217.61	1251.81
67.5131	1733.18	1368.13	1048.31	1217.03	1252.59
67.5457	1733.87	1364.87	1048.04	1216.55	1252.3
67.5783	1733.09	1364.56	1045.91	1220.22	1250.97
67.611	1731.87	1364.4	1043.56	1218.59	1249.99
67.6436	1730.31	1361.53	1045.17	1216.33	1252.55
67.6762	1730.41	1359.83	1043.05	1214.87	1248.16
67.7089	1728.07	1361.53	1045.43	1214.95	1245.81
67.7415	1726.24	1358.08	1042.21	1212.71	1242.93
67.7742	1724.28	1361.28	1043.56	1213.59	1243.99
67.8068	1721.93	1356.16	1039.41	1213.01	1244.43
67.8394	1722.74	1359.86	1040.96	1217.22	1244.88
67.8721	1722.05	1355.89	1039.27	1212.56	1242.29
67.9047	1718.76	1356.82	1042.3	1212.24	1240.83
67.9373	1719.72	1354.93	1038.8	1213.15	1240.45
67.97	1717.53	1355.72	1043.96	1211.84	1240.37
68.0026	1714.25	1353.07	1037.11	1206.9	1238.38
68.0352	1713.67	1354.33	1037.16	1212.23	1237.46
68.0679	1712.04	1351.07	1036.11	1208.49	1237.1
68.1005	1711.89	1353.01	1039.77	1213.55	1237.49
68.1332	1708.01	1350.84	1036.66	1204.54	1235.46
68.1658	1712.33	1349.34	1036.07	1206.85	1233.32
68.1984	1709.95	1348.37	1034.35	1201.51	1232.56
68.2311	1708.15	1349.42	1036.57	1207.15	1234.69
68.2637	1704.46	1345.92	1033.15	1205.15	1233.57
68.2963	1705.08	1348.68	1032.67	1204.34	1234.15
68.329	1704.83	1346.67	1030.53	1200.26	1229.89
68.3616	1706.22	1345.96	1033.13	1202.14	1234.22
68.3943	1704.25	1343.22	1029.29	1199.09	1232.29
68.4269	1705.52	1345.45	1028.44	1196.18	1230.52
68.4595	1704.68	1345.51	1027.15	1194.2	1226.3
68.4922	1699.42	1342.57	1029.02	1199.4	1227.34
68.5248	1698.38	1339.82	1026.02	1196.06	1227.17
68.5574	1699.36	1344.16	1028.81	1196.51	1231.77
68.5901	1700.21	1340.84	1026.5	1192.67	1229.19
68.6227	1699.07	1339.53	1029.05	1198.23	1226.5
68.6554	1697.1	1338.29	1025.86	1194.8	1226.19
68.688	1695.94	1339.05	1027.56	1192.24	1226.67
68.7206	1693.74	1336.01	1025.25	1191.8	1224.04
68.7533	1693.28	1334.87	1025.47	1191.77	1222.29
68.7859	1689.67	1334.17	1021.52	1190.64	1222.35
68.8185	1691.24	1336.45	1023.7	1190.84	1224.77
68.8512	1691.59	1334.36	1019.94	1188.35	1219.71
68.8838	1690	1335.05	1021.65	1187.79	1219.77
68.9164	1689.23	1332.2	1017.4	1187.86	1217.55
68.9491	1687.54	1332.32	1018.23	1185.86	1217.67
68.9817	1685.09	1327.71	1015.92	1183.65	1213.5
69.0144	1687.02	1329.74	1017.48	1187.94	1217.06
69.047	1685.83	1327.85	1014.05	1186.68	1216.47
69.0796	1685.43	1328.05	1015.07	1184.19	1216.95
69.1123	1682.86	1325.41	1016.52	1183.66	1211.79
69.1449	1687.48	1327.71	1015.97	1185.84	1215.68
69.1775	1684.08	1325.39	1014.68	1182.71	1211.65
69.2102	1680.76	1329.03	1016.49	1178.02	1211.55
69.2428	1679.82	1325.1	1010.75	1175.15	1211.79
69.2755	1679.13	1323.22	1016.16	1178.97	1213.73
69.3081	1677.34	1319.8	1012.21	1177.88	1208.24
69.3407	1673.3	1323.35	1013.56	1175.49	1210.16
69.3734	1669.16	1318.79	1010.74	1174.73	1209.76
69.406	1672.66	1316.58	1012.72	1176.34	1210.22
69.4386	1672.82	1318.14	1010.44	1172.02	1204.58
69.4713	1674.7	1321.63	1009.04	1173.59	1207.25
69.5039	1670.81	1321.82	1006.75	1171.13	1202.49
69.5366	1670.41	1320.24	1009.99	1172.83	1206.04
69.5692	1668.62	1315.58	1006.7	1169.78	1202.11
69.6018	1667.17	1319.39	1007.34	1169.79	1205.5
69.6345	1664.02	1313.8	1004.31	1166.74	1202.09
69.6671	1669.04	1316.94	1006.27	1172.2	1208.96
69.6997	1665.63	1313.57	1002.9	1169.14	1204.03
69.7324	1662.98	1316.17	1006.54	1166.61	1202.84
69.765	1661.83	1311.93	1004.7	1164.56	1198.48
69.7977	1659.71	1312.14	1003.67	1167.67	1198.42
69.8303	1657.1	1310.4	1001.79	1166.5	1195.1
69.8629	1661.29	1312.09	1004.62	1163.68	1195.54
69.8956	1659.34	1310.6	1001.49	1163.1	1196.12
69.9282	1661.17	1310.94	1000.81	1165.36	1197.52
69.9608	1659.5	1309.1	998.117	1163.74	1195.62
69.9935	1658.8	1306.7	1000.23	1161.98	1192.93
70.0261	1655.17	1305.87	998.293	1160.39	1191.48
70.0587	1653.67	1307.71	998.113	1160.59	1192.97
70.0914	1654.63	1304.17	998.024	1158.52	1191.71
70.124	1652.21	1304.42	995.875	1156.46	1191.32
70.1567	1650.14	1299.9	993.8	1155.28	1189.18
70.1893	1651.59	1298.58	994.129	1155.63	1190.08
70.2219	1647.84	1297.74	994.363	1154.62	1188.53
70.2546	1645.51	1299.89	997.608	1155.27	1186.54
70.2872	1645.08	1300.18	996.294	1155.52	1185.33
70.3198	1646.61	1297.91	992.696	1152.5	1183.46
70.3525	1645.43	1295.72	992.169	1152.12	1182.84
70.3851	1641.55	1295.4	990.144	1154.43	1182.62
70.4178	1641.75	1297.81	987.892	1153.62	1181.85
70.4504	1642.76	1295.5	990.375	1153.72	1180.53
70.483	1642.69	1294.04	988.821	1154.71	1181.27
70.5157	1640.92	1295.77	987.8	1154.12	1179.61
70.5483	1640.28	1294.3	988.051	1152.91	1178.78
70.5809	1639.1	1290.59	986.138	1152.73	1178.15
70.6136	1635.09	1289.63	986.062	1150.86	1176.72
70.6462	1633.22	1290.11	987.009	1147.93	1177.72
70.6789	1630.89	1290.61	988.093	1147.37	1175.76
70.7115	1626.1	1287.87	985.262	1146.12	1174.14
70.7441	1631.29	1286.87	981.725	1145.4	1174.91
70.7768	1630.64	1283.57	982.797	1146.83	1173.05
70.8094	1629.89	1285.72	982.562	1146.08	1173.18
70.842	1628.24	1282.28	981.518	1142.95	1172.44
70.8747	1627.47	1288.68	982.121	1140.6	1171.19
70.9073	1625.26	1286.77	980.07	1137.07	1167.36
70.9399	1627.28	1285.04	980.811	1140.79	1170.98
70.9726	1626.05	1285.03	977.403	1139.2	1168.78
71.0052	1625.48	1286.03	980.141	1140.57	1169.44
71.0379	1622.11	1283.95	978.313	1134.34	1167.3
71.0705	1625.03	1284.38	980.388	1137.45	1169.55
71.1031	1621.72	1279.97	975.879	1134.32	1168.26
71.1358	1622.68	1280.08	977.471	1139.17	1168.75
71.1684	1619.08	1278.14	973.207	1134.54	1165.86
71.201	1618.64	1279.67	977.755	1136.45	1167.48
71.2337	1616.86	1273.73	973.774	1133.56	1162.03
71.2663	1614.16	1278.28	974.575	1131.86	1165.87
71.299	1614.7	1274.17	972.34	1131.23	1161
71.3316	1611.95	1278.32	970.912	1129.59	1160.82
71.3642	1611.34	1277.45	969.971	1124.67	1162.3
71.3969	1612.9	1275.53	972.818	1127.34	1160.35
71.4295	1609.76	1273.91	969.326	1124.3	1159.56
71.4621	1608.6	1275.85	974.439	1127.41	1160.89
71.4948	1607.78	1273.69	969.955	1124.24	1159.27
71.5274	1608.23	1277.07	970.201	1124.38	1158.53
71.5601	1607.69	1273.62	968.942	1119.99	1156.45
71.5927	1611.43	1272.26	968.657	1125.3	1158.83
71.6253	1606.32	1270.88	966.584	1122.69	1154.72
71.658	1607.33	1270.19	969.36	1123.27	1155.16
71.6906	1604.02	1270.4	965.923	1120.59	1153.13
71.7232	1602.56	1275.66	965.526	1120.67	1153.3
71.7559	1601.15	1273.12	964.066	1117.16	1151.67
71.7885	1602.46	1271.7	965.312	1119.46	1153.1
71.8211	1600.47	1266.41	964.274	1117.99	1152.45
71.8538	1596.76	1267.8	964.316	1119.46	1151.43
71.8864	1598.04	1265.34	961.099	1116.13	1148.87
71.9191	1593.48	1264.38	963.276	1115.51	1151.5
71.9517	1595.09	1264.25	961.677	1114.87	1149.54
71.9843	1596.72	1262.2	961.229	1113.5	1148.63
72.017	1594.72	1262.42	961.107	1112.25	1147.07
72.0496	1595.3	1263.7	960.524	1111.87	1147.84
72.0822	1592.76	1263.2	957.682	1111.45	1146.7
72.1149	1592.24	1260.29	958.914	1111.67	1143.88
72.1475	1591.74	1259.37	957.566	1108.48	1145
72.1802	1590.43	1259.17	958.346	1108.4	1143.01
72.2128	1587.92	1256.22	956.443	1107.94	1141.07
72.2454	1584.03	1260.36	957.656	1110.86	1142.72
72.2781	1585.58	1255.78	954.456	1110.36	1141.85
72.3107	1585.04	1255.71	953.571	1108.22	1139.81
72.3433	1585.06	1254.49	953.366	1106.66	1137.41
72.376	1584.78	1253.84	953.196	1106.1	1137.16
72.4086	1581.36	1254.12	953.307	1105.13	1137.55
72.4413	1577.9	1252.31	952.365	1104.69	1136.81
72.4739	1581.68	1250.15	950.568	1104.16	1137.13
72.5065	1578.98	1248.61	948.382	1100.94	1134.96
72.5392	1579.54	1246.69	949.344	1103.19	1132.46
72.5718	1579.49	1244.91	950.815	1101.41	1132.91
72.6044	1577.55	1246.39	952.877	1100.94	1137.5
72.6371	1573.11	1244.98	950.928	1099.52	1136.58
72.6697	1574.44	1243.95	947.158	1098.52	1135.08
72.7023	1569.45	1242.39	944.89	1096.99	1132.6
72.735	1573.1	1243.08	943.208	1099.53	1130.33
72.7676	1572.57	1241.5	939.877	1094.25	1128.95
72.8003	1571.3	1243.34	946.416	1095.25	1130.94
72.8329	1568.04	1240.04	945.17	1092.9	1124.91
72.8655	1568.95	1241.58	944.731	1093.76	1126.57
72.8982	1567.89	1236.54	943.063	1091.35	1127.9
72.9308	1566.15	1235.92	941.916	1093.7	1128.01
72.9634	1567.42	1234.52	939.084	1091.01	1123.78
72.9961	1567.19	1237.34	941.708	1091.81	1126.55
73.0287	1565.84	1236.28	939.707	1088.59	1126.1
73.0614	1562.51	1235.86	941.289	1091.29	1125.31
73.094	1561.3	1235.89	940.327	1089.72	1122.31
73.1266	1562.05	1233.2	938.921	1091.41	1122.32
73.1593	1560.15	1229.59	937.618	1086.29	1122.12
73.1919	1562.53	1231.47	939.837	1088.27	1123.44
73.2245	1559.54	1230.03	937.179	1086	1118.53
73.2572	1560.09	1231.41	938.58	1085.12	1120.84
73.2898	1556.7	1232.4	934.881	1084.36	1121.02
73.3225	1556.48	1235.87	937.547	1086.87	1118.82
73.3551	1556.19	1231.73	935.874	1083.77	1115.16
73.3877	1553.67	1230.64	933.592	1084.25	1117.18
73.4204	1553.65	1229.87	931.369	1084.26	1115.89
73.453	1555.34	1228.99	934.604	1085.35	1116.92
73.4856	1551.13	1223.45	931.635	1082.05	1112.67
73.5183	1552.19	1225.25	932.708	1080.79	1113.62
73.5509	1550.49	1223.65	930.066	1076.82	1110.38
73.5836	1548.38	1224.85	931.744	1079.56	1114.54
73.6162	1547.02	1223.7	926.921	1076.68	1111.81
73.6488	1548.23	1220.91	930.361	1082.4	1110.84
73.6815	1545.42	1219.49	927.26	1078.01	1109.58
73.7141	1544.64	1218.17	931.846	1078.76	1113.56
73.7467	1540.98	1216.25	925.121	1073.46	1107.91
73.7794	1543.98	1219.53	928.755	1074.92	1106.51
73.812	1540.35	1217.61	924.487	1072.67	1104.29
73.8446	1542.21	1217.76	927.331	1072.15	1109.14
73.8773	1540.69	1215.98	925.537	1071.36	1108.51
73.9099	1541.42	1217.78	923.577	1072.96	1106.39
73.9426	1539.04	1215.23	922.209	1069.47	1104.55
73.9752	1534.91	1215.16	924.398	1068.1	1105.35
74.0078	1534.93	1214.63	923.429	1068.35	1105.11
74.0405	1537.66	1212.58	923.318	1069.59	1106.47
74.0731	1537.93	1212.81	923.908	1068.37	1105.09
74.1057	1536.52	1213.43	922.919	1065.47	1102.76
74.1384	1531.77	1212.09	922.646	1066.08	1103.37
74.171	1527.24	1209.66	920.754	1064.75	1099.65
74.2037	1529.57	1212.24	921.833	1064.78	1102.25
74.2363	1530.43	1210.8	920.513	1064.95	1099.56
74.2689	1527.71	1209.25	916.246	1062.32	1097.96
74.3016	1523.6	1205.1	917.172	1060.16	1098.29
74.3342	1526.15	1206	917.732	1064.25	1098.64
74.3668	1525.26	1204.55	914.47	1060.56	1093.4
74.3995	1527.7	1207.65	919.188	1060.53	1092.76
74.4321	1521.93	1204.01	915.152	1058.11	1091.65
74.4648	1522.37	1203.27	916.259	1062.24	1096.55
74.4974	1522.11	1201.33	913.923	1059.1	1091.99
74.53	1516.93	1205.17	918.333	1060.41	1097.31
74.5627	1517.54	1202.46	912.558	1058.15	1094.12
74.5953	1516.35	1204.77	912.551	1057	1091.15
74.6279	1512.2	1201.86	910.645	1054.83	1088.35
74.6606	1517.21	1200.87	915.814	1055.88	1091.09
74.6932	1514.34	1199.64	910.746	1056.2	1088.28
74.7258	1513.32	1200.49	909.039	1052	1084.93
74.7585	1515.84	1197.79	907.073	1051.08	1086.86
74.7911	1516.13	1200.28	909.499	1054.68	1092.89
74.8238	1512.27	1196.37	907.316	1049.84	1086.55
74.8564	1511.78	1197.81	908.391	1052.19	1087.53
74.889	1507.99	1194.33	906.948	1049.31	1087.97
74.9217	1508.49	1195.82	908.531	1049.45	1087.87
74.9543	1506.32	1195.65	905.572	1048.79	1084.79
74.9869	1508.36	1195.61	906.008	1051.16	1085.1
75.0196	1505.48	1192.96	902.88	1047.13	1082.71
75.0522	1504.3	1191.24	902.56	1043.98	1081.19
75.0849	1504.81	1191.3	903.01	1044.11	1082.96
75.1175	1503.57	1190.56	900.353	1043.28	1082.54
75.1501	1500.89	1191.89	900.18	1044.77	1079.67
75.1828	1499.86	1189.94	895.714	1043.68	1078.65
75.2154	1500.13	1188.42	900.624	1044.17	1079.71
75.248	1497.86	1184.82	899.247	1041.39	1077.63
75.2807	1496.22	1186.28	903.028	1043.12	1076.93
75.3133	1494.09	1185.49	898.406	1040.16	1074.17
75.346	1494.16	1187.7	897.806	1038.99	1079.78
75.3786	1495.25	1183.09	892.737	1036.79	1078.42
75.4112	1497.3	1185.3	898.539	1037.58	1076.96
75.4439	1492.31	1183.27	896.088	1035.21	1073.65
75.4765	1493.1	1185	898.933	1036.67	1074.32
75.5091	1493.58	1181.9	894.731	1034.5	1075.24
75.5418	1494.72	1182.89	896.66	1035.08	1075.55
75.5744	1489.74	1178.02	894.71	1033.61	1069.73
75.607	1489.25	1179.04	893.797	1035.34	1072.09
75.6397	1487.5	1176.89	889.786	1032.81	1070.18
75.6723	1484.55	1180.69	893.619	1038.66	1068.84
75.705	1485.68	1178.44	892.49	1033.37	1068.78
75.7376	1488.44	1177.62	893.855	1032.33	1068.4
75.7702	1484.66	1176.46	891.943	1029.07	1067.42
75.8029	1484.6	1178.75	893.314	1029.66	1070.73
75.8355	1482.38	1174.33	890.115	1029.06	1064.96
75.8681	1481.93	1174.98	893.53	1030.68	1066.61
75.9008	1479.87	1171.44	889.852	1031.08	1063.29
75.9334	1476.86	1173.96	888.595	1032.56	1067.74
75.9661	1476.15	1172.04	886.207	1028.68	1065.19
75.9987	1475.86	1172.69	886.362	1028.65	1063.62
76.0313	1473.68	1171.14	886.804	1029.61	1061.5
76.064	1474.29	1170.41	887.716	1030.4	1060.79
76.0966	1475.72	1171.26	887.088	1029.56	1062.04
76.1292	1475.14	1168.2	885.217	1025.75	1061.22
76.1619	1476.42	1167.39	885.727	1024.93	1059.12
76.1945	1475.45	1167.67	883.616	1024.56	1056.96
76.2272	1470.08	1166.48	884.602	1025.02	1059.98
76.2598	1466.55	1165.19	880.408	1020.56	1055.53
76.2924	1470.69	1168.24	881.281	1025.08	1059.78
76.3251	1471	1165.53	878.113	1020.57	1056.86
76.3577	1472.39	1164.82	882.106	1021.26	1058.25
76.3903	1470.4	1163.96	880.141	1020.06	1054.77
76.423	1469.36	1165.78	880.155	1025.26	1057.98
76.4556	1467.76	1162.13	878.745	1021.62	1052.46
76.4883	1469.04	1165.42	880.275	1022.08	1054.02
76.5209	1466.71	1162.62	878.186	1016.35	1049.92
76.5535	1469.41	1161.68	878.191	1014.21	1053.47
76.5862	1467.99	1159.53	875.596	1011.65	1052.74
76.6188	1465.72	1159.4	876.608	1015.57	1051.97
76.6514	1463.99	1158.98	875.733	1013.71	1050.76
76.6841	1462.26	1159.13	874.962	1011.46	1049.99
76.7167	1463.16	1157.8	874.111	1010.94	1047.75
76.7493	1464.48	1155.77	872.696	1010.85	1046.07
76.782	1460.49	1156.68	872.217	1009.75	1046.74
76.8146	1454.42	1156.11	871.711	1006.09	1045.63
76.8473	1460.09	1155.96	873.868	1011.05	1048.9
76.8799	1457.82	1153.73	871.591	1007.83	1043.14
76.9125	1459.2	1154.4	873.638	1009.55	1048.64
76.9452	1457.57	1155.13	871.017	1004.25	1045.61
76.9778	1455.41	1156.85	873.278	1008.4	1045.75
77.0104	1451.29	1154.95	870.99	1002.99	1044.31
77.0431	1454.78	1152.43	869.052	1007.09	1045.69
77.0757	1453.54	1151.47	866.512	1003.27	1041.14
77.1084	1448.76	1148.26	872.629	1004.28	1043.21
77.141	1449.21	1145.9	868.637	999.051	1042.99
77.1736	1452.55	1152.92	869.093	1003.52	1041.68
77.2063	1449.77	1150.56	867.635	1001.75	1038.24
77.2389	1448.51	1147.83	865.937	1000	1039.14
77.2715	1449.11	1145.88	863.273	999.957	1041.24
77.3042	1446.98	1144.01	861.714	998.759	1040.17
77.3368	1442.33	1146.12	864.008	998.823	1038.74
77.3695	1441.82	1147.07	863.081	998.442	1037.2
77.4021	1441.88	1145.18	861.739	998.697	1038.04
77.4347	1442.18	1143.79	860.939	996.261	1036.18
77.4674	1438.73	1144.25	861.128	997.449	1034.56
77.5	1437.07	1142.41	859.623	997.648	1032.25
77.5326	1437.77	1142.43	860.39	996.218	1034.1
77.5653	1432.71	1139.46	860.268	993.186	1032.69
77.5979	1437.51	1142.94	859.015	993.623	1033.04
77.6305	1434.08	1141.87	857.069	992.87	1031.32
77.6632	1433.66	1138.65	858.056	991.209	1032.61
77.6958	1431.74	1136.13	856.408	987.208	1031.51
77.7285	1432.29	1139.16	858.264	990.251	1030.76
77.7611	1430.58	1138.43	854.923	989.516	1028.88
77.7937	1429.93	1136.96	856.466	991.971	1029.98
77.8264	1426.23	1135.13	855.264	991.569	1025.33
77.859	1428.01	1136.41	853.145	987.381	1027.35
77.8916	1430.42	1137.04	852.667	985.967	1024.25
77.9243	1426.4	1134.76	852.593	988.484	1027.62
77.9569	1424.31	1132.93	848.254	985.908	1026.14
77.9896	1426.74	1133.36	853.473	987.708	1025.23
78.0222	1425.27	1131.74	851.944	984.007	1021.89
78.0548	1419.03	1133.19	853.626	984.736	1026.08
78.0875	1418.78	1130.14	848.765	979.588	1022.6
78.1201	1419.08	1132.12	850.336	983.67	1024.16
78.1527	1417.26	1130.65	850.461	980.403	1020.07
78.1854	1416.6	1131.41	850.358	981.629	1024.39
78.218	1417.05	1131.45	845.869	980.68	1017.98
78.2507	1416.28	1129.49	848.399	981.892	1023.41
78.2833	1414.81	1126.68	846.576	980.777	1017.17
78.3159	1413.56	1127.74	851.367	981.298	1017.84
78.3486	1415.97	1126.85	848.14	979.007	1014.46
78.3812	1412.73	1128.54	846.973	977.901	1019.33
78.4138	1410.73	1123.9	846.693	973.581	1014.54
78.4465	1411.64	1126.24	846.841	978.273	1017.36
78.4791	1411.15	1123.76	843.876	974.321	1016.97
78.5117	1410.07	1122.81	842.245	972.431	1016.97
78.5444	1409.45	1120.96	841.293	972.946	1015.35
78.577	1407.66	1123.04	843.506	973.251	1009.34
78.6097	1406.84	1121.96	841.831	973.906	1003.83
78.6423	1406.02	1124.42	842.417	972.102	1001.67
78.6749	1403.05	1121.6	842.597	970.379	999.023
78.7076	1399.97	1116.86	841.049	969.993	996.094
78.7402	1406.31	1119.96	839.115	969.34	998.308
78.7728	1406.01	1118.7	835.468	964.557	997.105
78.8055	1402.16	1118.04	838.945	970.424	999.955
78.8381	1401.65	1118.07	837.567	965.423	994.415
78.8708	1398.37	1117.85	838.747	968.257	994.39
78.9034	1399.37	1115.25	835.59	964.823	992.315
78.936	1399.55	1114.73	837.867	966.844	995.615
78.9687	1399.85	1111.25	837.59	963.826	992.338
79.0013	1396.08	1113.37	836.706	966.256	994.484
79.0339	1395.43	1113.73	833.163	963.154	991.423
79.0666	1397.56	1116.06	835.716	966.473	992.867
79.0992	1396.16	1112.85	832.206	961.224	991.907
79.1319	1396.37	1112.19	835.88	962.368	990.471
79.1645	1393.81	1111.03	833.652	959.672	984.995
79.1971	1391.04	1112.54	832.479	960.883	989.816
79.2298	1391.74	1109.85	830.396	957.442	985.481
79.2624	1391.52	1111.41	832.866	961.202	986.322
79.295	1391.07	1109.42	831.307	956.199	984.668
79.3277	1391.9	1108.64	832.419	957.652	985.799
79.3603	1391.59	1107.32	830.605	955.656	982.435
79.393	1390.51	1110.91	834.316	957.741	981.536
79.4256	1386.51	1107.4	830.416	956.607	980.571
79.4582	1385.19	1104.5	828.7	955.775	979.276
79.4909	1386.16	1103.9	828.779	955.658	980.379
79.5235	1382.43	1103.44	826.059	954.259	980.506
79.5561	1383.74	1104.61	826.512	954.232	977.585
79.5888	1381.89	1103.44	825.576	954.729	977.965
79.6214	1381.36	1102.96	824.015	953.041	977.549
79.654	1382.49	1103.41	824.307	951.815	976.529
79.6867	1381.3	1101.64	825.457	951.648	978.778
79.7193	1378.28	1101.23	824.545	950.219	978.719
79.752	1377.8	1102.25	825.288	950.127	977.048
79.7846	1377.61	1100	822.559	947.457	973.879
79.8172	1379.24	1103.41	823.377	948.276	973.975
79.8499	1378.67	1099.53	821.432	945.999	971.409
79.8825	1374.51	1099.24	821.019	945.518	971.976
79.9151	1372.31	1096.76	819.642	942.295	968.696
79.9478	1373.13	1099.36	821.265	945.297	969.806
79.9804	1372.03	1096.89	818.498	942.374	968.164
80.0131	1373.12	1096.29	820.498	942.978	970.192
80.0457	1372.69	1093.34	819.026	940.445	967.024
80.0783	1372.78	1094.94	822.183	944.85	967.7
80.111	1370.43	1091.79	819.482	942.192	962.671
80.1436	1367.57	1092.27	821.21	942.737	964.145
80.1762	1365.21	1091.83	820.68	941.923	964.286
[truncated: 301 more rows]

## Sheet: 350 nm (1st derivative)
	First derivative of fluorescence counts at 350 nm
Temperature, °C	VPS34-CII WT
15	mCherry-VPS34-CII WT	mCherry-VPS34-CII (VPS34 199-REIE-202 > AAAA)	mCherry-VPS34-CII (VPS34 199-REIE-202 > ERIR)	mCherry-VPS34-CII (VPS15 579-SHMIT-583 > DDMIE)	mCherry-VPS34-CII (VPS34 199-REIE-202 > ERIR and VPS15 579-SHMIT-583 > DDMIE)
15.0326	-33.0292	-78.6457	-43.0652	-70.1677	-37.6871
15.0653	-33.1696	-78.4829	-43.0037	-70.0295	-37.6507
15.0979	-33.3102	-78.3201	-42.9421	-69.8914	-37.6144
15.1305	-33.451	-78.1572	-42.8806	-69.7533	-37.5781
15.1632	-33.5921	-77.9942	-42.8191	-69.6154	-37.5419
15.1958	-33.7333	-77.8312	-42.7576	-69.4775	-37.5057
15.2285	-33.8747	-77.6681	-42.6962	-69.3398	-37.4695
15.2611	-34.0163	-77.5049	-42.6347	-69.2022	-37.4334
15.2937	-34.1581	-77.3417	-42.5733	-69.0646	-37.3973
15.3264	-34.3001	-77.1785	-42.5119	-68.9272	-37.3613
15.359	-34.4423	-77.0152	-42.4506	-68.7899	-37.3253
15.3916	-34.5846	-76.8518	-42.3893	-68.6528	-37.2893
15.4243	-34.7272	-76.6884	-42.328	-68.5158	-37.2534
15.4569	-34.8698	-76.525	-42.2668	-68.3789	-37.2175
15.4896	-35.0127	-76.3615	-42.2056	-68.2421	-37.1817
15.5222	-35.1556	-76.198	-42.1445	-68.1055	-37.1459
15.5548	-35.2988	-76.0345	-42.0835	-67.9691	-37.1102
15.5875	-35.442	-75.871	-42.0225	-67.8328	-37.0744
15.6201	-35.5854	-75.7074	-41.9616	-67.6966	-37.0388
15.6527	-35.7289	-75.5438	-41.9008	-67.5607	-37.0031
15.6854	-35.8725	-75.3802	-41.8401	-67.4248	-36.9675
15.718	-36.0162	-75.2167	-41.7795	-67.2892	-36.9319
15.7507	-36.16	-75.0531	-41.7189	-67.1537	-36.8963
15.7833	-36.3039	-74.8895	-41.6585	-67.0184	-36.8608
15.8159	-36.4478	-74.7259	-41.5982	-66.8833	-36.8253
15.8486	-36.5918	-74.5623	-41.538	-66.7483	-36.7897
15.8812	-36.7359	-74.3988	-41.478	-66.6136	-36.7542
15.9138	-36.88	-74.2352	-41.418	-66.4789	-36.7188
15.9465	-37.0241	-74.0716	-41.3582	-66.3445	-36.6833
15.9791	-37.1682	-73.9081	-41.2985	-66.2102	-36.6478
16.0117	-37.3124	-73.7445	-41.239	-66.0761	-36.6123
16.0444	-37.4565	-73.581	-41.1796	-65.9422	-36.5768
16.077	-37.6007	-73.4175	-41.1204	-65.8084	-36.5412
16.1097	-37.7448	-73.2539	-41.0614	-65.6748	-36.5057
16.1423	-37.8889	-73.0904	-41.0025	-65.5413	-36.4701
16.1749	-38.033	-72.9268	-40.9438	-65.408	-36.4344
16.2076	-38.177	-72.7633	-40.8852	-65.2748	-36.3988
16.2402	-38.321	-72.5997	-40.8268	-65.1417	-36.363
16.2728	-38.4649	-72.4361	-40.7687	-65.0087	-36.3272
16.3055	-38.6087	-72.2725	-40.7107	-64.8758	-36.2914
16.3381	-38.7525	-72.1088	-40.6529	-64.7431	-36.2554
16.3708	-38.8962	-71.9452	-40.5953	-64.6104	-36.2194
16.4034	-39.0397	-71.7814	-40.5379	-64.4778	-36.1834
16.436	-39.1832	-71.6177	-40.4807	-64.3453	-36.1472
16.4687	-39.3266	-71.4539	-40.4237	-64.2129	-36.1109
16.5013	-39.4699	-71.29	-40.3669	-64.0805	-36.0746
16.5339	-39.613	-71.1261	-40.3104	-63.9482	-36.0381
16.5666	-39.756	-70.9621	-40.254	-63.8159	-36.0015
16.5992	-39.8989	-70.798	-40.1979	-63.6836	-35.9649
16.6319	-40.0416	-70.6339	-40.1421	-63.5514	-35.9281
16.6645	-40.1843	-70.4697	-40.0864	-63.4192	-35.8912
16.6971	-40.3267	-70.3054	-40.031	-63.287	-35.8542
16.7298	-40.4691	-70.141	-39.9758	-63.1548	-35.817
16.7624	-40.6113	-69.9766	-39.9208	-63.0225	-35.7798
16.795	-40.7533	-69.812	-39.8661	-62.8903	-35.7424
16.8277	-40.8953	-69.6473	-39.8116	-62.7581	-35.705
16.8603	-41.0371	-69.4825	-39.7573	-62.6258	-35.6674
16.893	-41.1788	-69.3176	-39.7033	-62.4934	-35.6297
16.9256	-41.3204	-69.1526	-39.6494	-62.361	-35.5919
16.9582	-41.462	-68.9874	-39.5957	-62.2286	-35.554
16.9909	-41.6034	-68.8221	-39.5423	-62.096	-35.516
17.0235	-41.7448	-68.6566	-39.489	-61.9634	-35.4779
17.0561	-41.8862	-68.491	-39.4358	-61.8307	-35.4398
17.0888	-42.0276	-68.3252	-39.3828	-61.6978	-35.4015
17.1214	-42.169	-68.1592	-39.33	-61.5649	-35.3632
17.154	-42.3106	-67.993	-39.2772	-61.4317	-35.3249
17.1867	-42.4522	-67.8265	-39.2244	-61.2985	-35.2864
17.2193	-42.594	-67.6598	-39.1717	-61.165	-35.248
17.252	-42.7361	-67.4929	-39.119	-61.0314	-35.2096
17.2846	-42.8785	-67.3256	-39.0662	-60.8975	-35.1712
17.3172	-43.0213	-67.158	-39.0133	-60.7635	-35.1328
17.3499	-43.1647	-66.9901	-38.9602	-60.6293	-35.0945
17.3825	-43.3087	-66.8217	-38.9069	-60.4948	-35.0564
17.4151	-43.4537	-66.6528	-38.8534	-60.3602	-35.0184
17.4478	-43.5997	-66.4834	-38.7995	-60.2255	-34.9806
17.4804	-43.7469	-66.3135	-38.7452	-60.0907	-34.9432
17.5131	-43.8957	-66.1429	-38.6905	-59.956	-34.9061
17.5457	-44.0462	-65.9717	-38.6353	-59.8215	-34.8696
17.5783	-44.1988	-65.7999	-38.5797	-59.6875	-34.8336
17.611	-44.3528	-65.6277	-38.5241	-59.555	-34.7983
17.6436	-44.4953	-65.4581	-38.4786	-59.4409	-34.7622
17.6762	-44.6364	-65.2889	-38.4329	-59.3282	-34.7264
17.7089	-44.7759	-65.1203	-38.3868	-59.2172	-34.6908
17.7415	-44.9138	-64.9524	-38.3405	-59.1076	-34.6556
17.7742	-45.0497	-64.7851	-38.2938	-58.9997	-34.6205
17.8068	-45.1836	-64.6187	-38.2469	-58.8933	-34.5858
17.8394	-45.3153	-64.4531	-38.1996	-58.7886	-34.5512
17.8721	-45.4446	-64.2884	-38.1519	-58.6853	-34.5168
17.9047	-45.5714	-64.1247	-38.104	-58.5836	-34.4825
17.9373	-45.6956	-63.962	-38.0558	-58.4834	-34.4484
17.97	-45.8169	-63.8004	-38.0072	-58.3847	-34.4143
18.0026	-45.9353	-63.6399	-37.9584	-58.2874	-34.3803
18.0352	-46.0506	-63.4805	-37.9092	-58.1916	-34.3463
18.0679	-46.1627	-63.3223	-37.8598	-58.0971	-34.3123
18.1005	-46.2716	-63.1652	-37.8101	-58.004	-34.2781
18.1332	-46.3771	-63.0094	-37.7601	-57.9122	-34.2439
18.1658	-46.4793	-62.8547	-37.7099	-57.8216	-34.2095
18.1984	-46.5779	-62.7011	-37.6594	-57.7322	-34.1749
18.2311	-46.673	-62.5487	-37.6087	-57.6439	-34.14
18.2637	-46.7646	-62.3975	-37.5577	-57.5567	-34.1049
18.2963	-46.8526	-62.2473	-37.5066	-57.4704	-34.0694
18.329	-46.9371	-62.0982	-37.4552	-57.3851	-34.0336
18.3616	-47.018	-61.9501	-37.4036	-57.3005	-33.9973
18.3943	-47.0954	-61.8031	-37.3519	-57.2168	-33.9606
18.4269	-47.1695	-61.6571	-37.3	-57.1337	-33.9234
18.4595	-47.2401	-61.512	-37.2481	-57.0512	-33.8856
18.4922	-47.3075	-61.3679	-37.196	-56.9691	-33.8472
18.5248	-47.3716	-61.2247	-37.1439	-56.8875	-33.8082
18.5574	-47.4326	-61.0824	-37.0918	-56.8063	-33.7686
18.5901	-47.4906	-60.941	-37.0398	-56.7253	-33.7283
18.6227	-47.5457	-60.8005	-36.9878	-56.6444	-33.6872
18.6554	-47.598	-60.661	-36.9359	-56.5637	-33.6455
18.688	-47.6476	-60.5223	-36.8841	-56.483	-33.6032
18.7206	-47.6946	-60.3846	-36.8326	-56.4024	-33.5601
18.7533	-47.7392	-60.2479	-36.7814	-56.3217	-33.5164
18.7859	-47.7815	-60.1122	-36.7304	-56.2409	-33.472
18.8185	-47.8217	-59.9776	-36.6798	-56.16	-33.4271
18.8512	-47.8599	-59.844	-36.6296	-56.0789	-33.3816
18.8838	-47.8961	-59.7116	-36.5799	-55.9978	-33.3357
18.9164	-47.9306	-59.5803	-36.5306	-55.9164	-33.2893
18.9491	-47.9635	-59.4503	-36.4817	-55.835	-33.2425
18.9817	-47.9949	-59.3214	-36.4334	-55.7533	-33.1953
19.0144	-48.025	-59.1938	-36.3855	-55.6715	-33.1479
19.047	-48.0539	-59.0675	-36.3382	-55.5895	-33.1003
19.0796	-48.0817	-58.9426	-36.2913	-55.5074	-33.0525
19.1123	-48.1085	-58.819	-36.245	-55.4252	-33.0046
19.1449	-48.1345	-58.6967	-36.1991	-55.3428	-32.9568
19.1775	-48.1598	-58.5759	-36.1537	-55.2603	-32.909
19.2102	-48.1845	-58.4565	-36.1087	-55.1777	-32.8613
19.2428	-48.2087	-58.3386	-36.0641	-55.095	-32.8139
19.2755	-48.2324	-58.2222	-36.0198	-55.0122	-32.7666
19.3081	-48.2557	-58.1072	-35.9758	-54.9293	-32.7197
19.3407	-48.2787	-57.9939	-35.9321	-54.8463	-32.673
19.3734	-48.3014	-57.882	-35.8884	-54.7632	-32.6268
19.406	-48.3237	-57.7717	-35.8449	-54.6801	-32.581
19.4386	-48.3458	-57.6631	-35.8015	-54.5968	-32.5356
19.4713	-48.3676	-57.556	-35.758	-54.5135	-32.4907
19.5039	-48.3891	-57.4505	-35.7144	-54.4301	-32.4462
19.5366	-48.4103	-57.3466	-35.6707	-54.3467	-32.4023
19.5692	-48.4311	-57.2443	-35.6267	-54.2632	-32.3589
19.6018	-48.4515	-57.1437	-35.5825	-54.1796	-32.3161
19.6345	-48.4714	-57.0447	-35.5379	-54.096	-32.2738
19.6671	-48.4908	-56.9472	-35.493	-54.0122	-32.2321
19.6997	-48.5095	-56.8514	-35.4476	-53.9284	-32.1909
19.7324	-48.5276	-56.7571	-35.4016	-53.8444	-32.1503
19.765	-48.5448	-56.6644	-35.3552	-53.7603	-32.1102
19.7977	-48.5611	-56.5732	-35.3082	-53.676	-32.0706
19.8303	-48.5764	-56.4835	-35.2605	-53.5916	-32.0315
19.8629	-48.5906	-56.3953	-35.2122	-53.507	-31.9929
19.8956	-48.6035	-56.3085	-35.1633	-53.4221	-31.9548
19.9282	-48.6152	-56.2231	-35.1138	-53.337	-31.9171
19.9608	-48.6254	-56.139	-35.0635	-53.2516	-31.8797
19.9935	-48.6342	-56.0562	-35.0127	-53.166	-31.8428
20.0261	-48.6413	-55.9747	-34.9612	-53.08	-31.8061
20.0587	-48.6469	-55.8943	-34.9091	-52.9936	-31.7697
20.0914	-48.6506	-55.815	-34.8564	-52.9069	-31.7335
20.124	-48.6526	-55.7369	-34.8032	-52.8198	-31.6975
20.1567	-48.6528	-55.6597	-34.7495	-52.7322	-31.6616
20.1893	-48.651	-55.5834	-34.6953	-52.6443	-31.6258
20.2219	-48.6472	-55.508	-34.6407	-52.5558	-31.5901
20.2546	-48.6415	-55.4334	-34.5858	-52.467	-31.5543
20.2872	-48.6338	-55.3596	-34.5306	-52.3777	-31.5186
20.3198	-48.6242	-55.2864	-34.4752	-52.2879	-31.4827
20.3525	-48.6125	-55.2138	-34.4195	-52.1977	-31.4468
20.3851	-48.5989	-55.1417	-34.3638	-52.107	-31.4107
20.4178	-48.5835	-55.0702	-34.3081	-52.0159	-31.3745
20.4504	-48.5662	-54.9991	-34.2524	-51.9244	-31.338
20.483	-48.5472	-54.9284	-34.1967	-51.8325	-31.3013
20.5157	-48.5265	-54.858	-34.1412	-51.7402	-31.2644
20.5483	-48.5043	-54.7879	-34.086	-51.6476	-31.2272
20.5809	-48.4806	-54.718	-34.031	-51.5546	-31.1897
20.6136	-48.4555	-54.6483	-33.9764	-51.4614	-31.1519
20.6462	-48.4293	-54.5788	-33.9222	-51.368	-31.1139
20.6789	-48.402	-54.5094	-33.8685	-51.2743	-31.0756
20.7115	-48.3738	-54.44	-33.8155	-51.1804	-31.037
20.7441	-48.3449	-54.3707	-33.763	-51.0863	-30.9982
20.7768	-48.3153	-54.3014	-33.7114	-50.9921	-30.9591
20.8094	-48.2854	-54.232	-33.6606	-50.8977	-30.9198
20.842	-48.2553	-54.1625	-33.6108	-50.8033	-30.8803
20.8747	-48.2251	-54.0929	-33.5619	-50.7089	-30.8406
20.9073	-48.1951	-54.0232	-33.5142	-50.6145	-30.8007
20.9399	-48.1655	-53.9533	-33.4678	-50.52	-30.7607
20.9726	-48.1365	-53.8832	-33.4225	-50.4257	-30.7205
21.0052	-48.1082	-53.8128	-33.3787	-50.3314	-30.6802
21.0379	-48.0808	-53.7423	-33.3362	-50.2372	-30.6399
21.0705	-48.0546	-53.6714	-33.2952	-50.1432	-30.5996
21.1031	-48.0296	-53.6004	-33.2558	-50.0494	-30.5593
21.1358	-48.0061	-53.529	-33.2179	-49.9557	-30.5191
21.1684	-47.9842	-53.4575	-33.1815	-49.8622	-30.479
21.201	-47.9641	-53.3856	-33.1468	-49.7689	-30.4392
21.2337	-47.9459	-53.3135	-33.1136	-49.6759	-30.3996
21.2663	-47.9296	-53.2412	-33.082	-49.583	-30.3603
21.299	-47.9154	-53.1686	-33.052	-49.4903	-30.3215
21.3316	-47.9034	-53.0958	-33.0235	-49.3978	-30.283
21.3642	-47.8936	-53.0229	-32.9964	-49.3055	-30.2451
21.3969	-47.886	-52.9497	-32.9708	-49.2135	-30.2078
21.4295	-47.8807	-52.8763	-32.9465	-49.1216	-30.1712
21.4621	-47.8777	-52.8027	-32.9235	-49.0299	-30.1352
21.4948	-47.8769	-52.729	-32.9017	-48.9384	-30.1001
21.5274	-47.8783	-52.6551	-32.881	-48.8471	-30.0657
21.5601	-47.8818	-52.5811	-32.8612	-48.7561	-30.0323
21.5927	-47.8875	-52.5069	-32.8424	-48.6652	-29.9998
21.6253	-47.8951	-52.4325	-32.8244	-48.5746	-29.9683
21.658	-47.9045	-52.358	-32.8071	-48.4843	-29.9378
21.6906	-47.9157	-52.2834	-32.7904	-48.3941	-29.9084
21.7232	-47.9285	-52.2086	-32.7741	-48.3043	-29.8802
21.7559	-47.9427	-52.1337	-32.7582	-48.2148	-29.853
21.7885	-47.9582	-52.0586	-32.7425	-48.1256	-29.827
21.8211	-47.9747	-51.9833	-32.7269	-48.0368	-29.8022
21.8538	-47.9922	-51.9079	-32.7114	-47.9483	-29.7786
21.8864	-48.0103	-51.8323	-32.6958	-47.8603	-29.7561
21.9191	-48.029	-51.7566	-32.68	-47.7727	-29.7347
21.9517	-48.048	-51.6806	-32.6639	-47.6856	-29.7145
21.9843	-48.0671	-51.6045	-32.6474	-47.599	-29.6954
22.017	-48.0862	-51.5282	-32.6304	-47.513	-29.6774
22.0496	-48.105	-51.4517	-32.6129	-47.4275	-29.6604
22.0822	-48.1234	-51.375	-32.5947	-47.3425	-29.6444
22.1149	-48.1411	-51.2981	-32.5758	-47.2582	-29.6293
22.1475	-48.158	-51.2209	-32.5562	-47.1745	-29.6152
22.1802	-48.1739	-51.1435	-32.5357	-47.0915	-29.602
22.2128	-48.1887	-51.0659	-32.5143	-47.0091	-29.5895
22.2454	-48.2021	-50.988	-32.4919	-46.9274	-29.5778
22.2781	-48.2141	-50.9099	-32.4685	-46.8464	-29.5668
22.3107	-48.2245	-50.8316	-32.4441	-46.7663	-29.5564
22.3433	-48.2332	-50.7529	-32.4187	-46.6869	-29.5466
22.376	-48.2402	-50.6741	-32.3921	-46.6083	-29.5372
22.4086	-48.2452	-50.595	-32.3644	-46.5306	-29.5283
22.4413	-48.2483	-50.5156	-32.3355	-46.4539	-29.5197
22.4739	-48.2494	-50.4359	-32.3055	-46.3782	-29.5113
22.5065	-48.2485	-50.3561	-32.2743	-46.3036	-29.5032
22.5392	-48.2455	-50.2759	-32.2419	-46.2301	-29.4952
22.5718	-48.2404	-50.1956	-32.2083	-46.1577	-29.4873
22.6044	-48.2333	-50.115	-32.1736	-46.0867	-29.4793
22.6371	-48.2241	-50.0343	-32.1376	-46.0169	-29.4714
22.6697	-48.2129	-49.9533	-32.1005	-45.9485	-29.4633
22.7023	-48.1997	-49.8722	-32.0622	-45.8814	-29.455
22.735	-48.1846	-49.7909	-32.0228	-45.8159	-29.4466
22.7676	-48.1676	-49.7095	-31.9823	-45.7518	-29.4378
22.8003	-48.1488	-49.6279	-31.9408	-45.6892	-29.4288
22.8329	-48.1284	-49.5463	-31.8983	-45.6282	-29.4194
22.8655	-48.1064	-49.4645	-31.8548	-45.5688	-29.4095
22.8982	-48.0829	-49.3827	-31.8104	-45.511	-29.3992
22.9308	-48.0581	-49.3009	-31.7652	-45.4548	-29.3884
22.9634	-48.032	-49.2192	-31.7193	-45.4003	-29.377
22.9961	-48.0048	-49.1375	-31.6727	-45.3474	-29.3651
23.0287	-47.9765	-49.056	-31.6254	-45.2961	-29.3525
23.0614	-47.9474	-48.9747	-31.5776	-45.2465	-29.3393
23.094	-47.9175	-48.8937	-31.5294	-45.1985	-29.3254
23.1266	-47.8869	-48.813	-31.4808	-45.1521	-29.3109
23.1593	-47.8558	-48.7328	-31.4319	-45.1072	-29.2956
23.1919	-47.8242	-48.6531	-31.3828	-45.0639	-29.2797
23.2245	-47.7923	-48.5739	-31.3335	-45.0221	-29.263
23.2572	-47.76	-48.4955	-31.2841	-44.9817	-29.2457
23.2898	-47.7276	-48.4178	-31.2347	-44.9427	-29.2277
23.3225	-47.6952	-48.341	-31.1853	-44.9051	-29.2091
23.3551	-47.6627	-48.2651	-31.136	-44.8687	-29.1899
23.3877	-47.6302	-48.1901	-31.0867	-44.8336	-29.1702
23.4204	-47.5979	-48.1162	-31.0376	-44.7997	-29.1499
23.453	-47.5659	-48.0434	-30.9887	-44.7668	-29.1292
23.4856	-47.534	-47.9718	-30.94	-44.7349	-29.1081
23.5183	-47.5025	-47.9015	-30.8914	-44.7039	-29.0867
23.5509	-47.4714	-47.8324	-30.843	-44.6738	-29.065
23.5836	-47.4407	-47.7646	-30.7949	-44.6444	-29.0431
23.6162	-47.4105	-47.6983	-30.7469	-44.6157	-29.021
23.6488	-47.3807	-47.6333	-30.6991	-44.5875	-28.9989
23.6815	-47.3515	-47.5698	-30.6514	-44.5598	-28.9767
23.7141	-47.3228	-47.5077	-30.6039	-44.5325	-28.9544
23.7467	-47.2947	-47.4472	-30.5565	-44.5056	-28.9322
23.7794	-47.2672	-47.3881	-30.5092	-44.4789	-28.9101
23.812	-47.2402	-47.3306	-30.4619	-44.4523	-28.888
23.8446	-47.2138	-47.2745	-30.4147	-44.4258	-28.866
23.8773	-47.188	-47.2201	-30.3674	-44.3993	-28.8442
23.9099	-47.1627	-47.1671	-30.3202	-44.3727	-28.8224
23.9426	-47.1378	-47.1157	-30.2728	-44.346	-28.8007
23.9752	-47.1134	-47.0657	-30.2253	-44.3191	-28.7791
24.0078	-47.0895	-47.0173	-30.1777	-44.2919	-28.7576
24.0405	-47.0658	-46.9703	-30.13	-44.2643	-28.7361
24.0731	-47.0425	-46.9248	-30.0821	-44.2363	-28.7146
24.1057	-47.0193	-46.8807	-30.034	-44.2079	-28.6932
24.1384	-46.9962	-46.8379	-29.9858	-44.1788	-28.6717
24.171	-46.9733	-46.7964	-29.9373	-44.1492	-28.65
24.2037	-46.9502	-46.7562	-29.8887	-44.119	-28.6283
24.2363	-46.927	-46.7172	-29.8399	-44.0881	-28.6063
24.2689	-46.9036	-46.6794	-29.7909	-44.0565	-28.5842
24.3016	-46.8799	-46.6425	-29.7418	-44.024	-28.5617
24.3342	-46.8558	-46.6067	-29.6926	-43.9908	-28.5388
24.3668	-46.8313	-46.5718	-29.6433	-43.9568	-28.5156
24.3995	-46.8062	-46.5377	-29.594	-43.922	-28.4919
24.4321	-46.7806	-46.5044	-29.5447	-43.8863	-28.4678
24.4648	-46.7542	-46.4717	-29.4954	-43.8498	-28.4431
24.4974	-46.7272	-46.4396	-29.4463	-43.8124	-28.4179
24.53	-46.6995	-46.408	-29.3974	-43.7742	-28.3921
24.5627	-46.6709	-46.3769	-29.3488	-43.7352	-28.3656
24.5953	-46.6416	-46.3461	-29.3005	-43.6953	-28.3385
24.6279	-46.6114	-46.3157	-29.2526	-43.6546	-28.3107
24.6606	-46.5804	-46.2854	-29.2051	-43.6132	-28.2823
24.6932	-46.5484	-46.2552	-29.1583	-43.571	-28.2531
24.7258	-46.5157	-46.2252	-29.112	-43.528	-28.2233
24.7585	-46.482	-46.1951	-29.0665	-43.4844	-28.1927
24.7911	-46.4475	-46.1649	-29.0218	-43.4401	-28.1614
24.8238	-46.4121	-46.1346	-28.978	-43.3952	-28.1294
24.8564	-46.3759	-46.104	-28.9351	-43.3496	-28.0967
24.889	-46.3388	-46.0732	-28.8934	-43.3036	-28.0634
24.9217	-46.301	-46.0421	-28.8527	-43.2569	-28.0294
24.9543	-46.2623	-46.0106	-28.8133	-43.2098	-27.9949
24.9869	-46.2228	-45.9787	-28.7752	-43.1623	-27.9598
25.0196	-46.1825	-45.9463	-28.7384	-43.1143	-27.9242
25.0522	-46.1414	-45.9134	-28.7032	-43.0659	-27.8881
25.0849	-46.0995	-45.88	-28.6695	-43.0172	-27.8516
25.1175	-46.0568	-45.846	-28.6374	-42.9681	-27.8148
25.1501	-46.0134	-45.8114	-28.607	-42.9188	-27.7778
25.1828	-45.9691	-45.7763	-28.5783	-42.8692	-27.7405
25.2154	-45.9241	-45.7405	-28.5514	-42.8194	-27.7032
25.248	-45.8783	-45.7041	-28.5263	-42.7694	-27.6657
25.2807	-45.8317	-45.6671	-28.5031	-42.7192	-27.6284
25.3133	-45.7844	-45.6295	-28.4818	-42.6688	-27.5911
25.346	-45.7363	-45.5913	-28.4624	-42.6183	-27.5541
25.3786	-45.6875	-45.5524	-28.4449	-42.5677	-27.5175
25.4112	-45.6379	-45.513	-28.4294	-42.5169	-27.4812
25.4439	-45.5877	-45.473	-28.4159	-42.466	-27.4455
25.4765	-45.5368	-45.4324	-28.4042	-42.415	-27.4104
25.5091	-45.4853	-45.3913	-28.3945	-42.3639	-27.376
25.5418	-45.4332	-45.3496	-28.3867	-42.3126	-27.3425
25.5744	-45.3805	-45.3073	-28.3807	-42.261	-27.3099
25.607	-45.3274	-45.2646	-28.3765	-42.2093	-27.2783
25.6397	-45.2738	-45.2213	-28.374	-42.1574	-27.248
25.6723	-45.2199	-45.1775	-28.3733	-42.1051	-27.2188
25.705	-45.1657	-45.1333	-28.3741	-42.0525	-27.191
25.7376	-45.1113	-45.0885	-28.3764	-41.9995	-27.1647
25.7702	-45.0567	-45.0433	-28.38	-41.9462	-27.1399
25.8029	-45.0021	-44.9975	-28.385	-41.8924	-27.1166
25.8355	-44.9475	-44.9514	-28.3911	-41.838	-27.0951
25.8681	-44.893	-44.9048	-28.3982	-41.7832	-27.0753
25.9008	-44.8387	-44.8578	-28.4062	-41.7277	-27.0573
25.9334	-44.7847	-44.8104	-28.4149	-41.6716	-27.0411
25.9661	-44.7311	-44.7626	-28.4242	-41.6148	-27.0268
25.9987	-44.6779	-44.7145	-28.434	-41.5573	-27.0145
26.0313	-44.6252	-44.666	-28.4441	-41.4991	-27.004
26.064	-44.5732	-44.6172	-28.4544	-41.4401	-26.9955
26.0966	-44.5218	-44.5681	-28.4648	-41.3803	-26.9888
26.1292	-44.4712	-44.5187	-28.475	-41.3196	-26.9841
26.1619	-44.4215	-44.469	-28.4851	-41.2581	-26.9812
26.1945	-44.3727	-44.419	-28.4949	-41.1958	-26.9801
26.2272	-44.3248	-44.3688	-28.5043	-41.1326	-26.9807
26.2598	-44.2781	-44.3182	-28.5131	-41.0686	-26.983
26.2924	-44.2324	-44.2674	-28.5214	-41.0037	-26.9868
26.3251	-44.188	-44.2163	-28.5289	-40.938	-26.9922
26.3577	-44.1449	-44.165	-28.5357	-40.8715	-26.9989
26.3903	-44.1032	-44.1133	-28.5416	-40.8042	-27.007
26.423	-44.0629	-44.0613	-28.5466	-40.7363	-27.0162
26.4556	-44.0241	-44.009	-28.5507	-40.6675	-27.0266
26.4883	-43.9868	-43.9565	-28.5537	-40.5982	-27.0381
26.5209	-43.9512	-43.9036	-28.5557	-40.5282	-27.0504
26.5535	-43.9173	-43.8504	-28.5566	-40.4576	-27.0636
26.5862	-43.8851	-43.7969	-28.5564	-40.3864	-27.0776
26.6188	-43.8548	-43.7431	-28.5552	-40.3148	-27.0922
26.6514	-43.8262	-43.6891	-28.5528	-40.2428	-27.1073
26.6841	-43.7995	-43.6348	-28.5492	-40.1704	-27.123
26.7167	-43.7747	-43.5803	-28.5446	-40.0977	-27.139
26.7493	-43.7518	-43.5255	-28.5389	-40.0248	-27.1553
26.782	-43.7308	-43.4705	-28.532	-39.9517	-27.1719
26.8146	-43.7118	-43.4153	-28.5241	-39.8785	-27.1886
26.8473	-43.6947	-43.3599	-28.5152	-39.8054	-27.2055
26.8799	-43.6794	-43.3043	-28.5052	-39.7324	-27.2224
26.9125	-43.666	-43.2487	-28.4943	-39.6595	-27.2393
26.9452	-43.6545	-43.1929	-28.4823	-39.587	-27.2563
26.9778	-43.6446	-43.1371	-28.4695	-39.5149	-27.2731
27.0104	-43.6364	-43.0812	-28.4557	-39.4433	-27.2899
27.0431	-43.6297	-43.0253	-28.441	-39.3723	-27.3065
27.0757	-43.6245	-42.9694	-28.4255	-39.3021	-27.323
27.1084	-43.6207	-42.9136	-28.4091	-39.2327	-27.3394
27.141	-43.6181	-42.8579	-28.3919	-39.1642	-27.3556
27.1736	-43.6165	-42.8022	-28.3739	-39.0968	-27.3716
27.2063	-43.616	-42.7468	-28.3551	-39.0306	-27.3875
27.2389	-43.6162	-42.6915	-28.3356	-38.9658	-27.4031
27.2715	-43.6172	-42.6364	-28.3153	-38.9023	-27.4185
27.3042	-43.6186	-42.5817	-28.2942	-38.8403	-27.4338
27.3368	-43.6203	-42.5272	-28.2725	-38.7799	-27.4488
27.3695	-43.6221	-42.4731	-28.2499	-38.7212	-27.4637
27.4021	-43.6239	-42.4194	-28.2267	-38.6643	-27.4783
27.4347	-43.6255	-42.3661	-28.2028	-38.6093	-27.4928
27.4674	-43.6266	-42.3133	-28.1782	-38.5561	-27.5071
27.5	-43.6271	-42.261	-28.1529	-38.5049	-27.5213
27.5326	-43.6267	-42.2093	-28.127	-38.4557	-27.5353
27.5653	-43.6254	-42.1581	-28.1004	-38.4085	-27.5492
27.5979	-43.6228	-42.1076	-28.0732	-38.3634	-27.563
27.6305	-43.6188	-42.0577	-28.0452	-38.3203	-27.5767
27.6632	-43.6133	-42.0084	-28.0166	-38.2793	-27.5904
27.6958	-43.606	-41.9598	-27.9874	-38.2404	-27.604
27.7285	-43.5968	-41.912	-27.9574	-38.2034	-27.6176
27.7611	-43.5856	-41.8648	-27.9267	-38.1685	-27.6312
27.7937	-43.5722	-41.8183	-27.8953	-38.1355	-27.6449
27.8264	-43.5565	-41.7727	-27.8631	-38.1044	-27.6586
27.859	-43.5385	-41.7278	-27.83	-38.0752	-27.6724
27.8916	-43.518	-41.6836	-27.7962	-38.0478	-27.6863
27.9243	-43.4949	-41.6403	-27.7615	-38.0221	-27.7004
27.9569	-43.4693	-41.5979	-27.7258	-37.9981	-27.7146
27.9896	-43.441	-41.5563	-27.6893	-37.9757	-27.7289
28.0222	-43.4102	-41.5155	-27.6518	-37.9547	-27.7434
28.0548	-43.3767	-41.4756	-27.6133	-37.9351	-27.758
28.0875	-43.3406	-41.4366	-27.5739	-37.9169	-27.7729
28.1201	-43.3019	-41.3984	-27.5334	-37.8998	-27.7878
28.1527	-43.2606	-41.3611	-27.492	-37.8837	-27.8029
28.1854	-43.217	-41.3247	-27.4496	-37.8687	-27.8181
28.218	-43.1709	-41.2892	-27.4063	-37.8545	-27.8334
28.2507	-43.1226	-41.2545	-27.362	-37.8411	-27.8487
28.2833	-43.0722	-41.2206	-27.3168	-37.8283	-27.8639
28.3159	-43.0198	-41.1875	-27.2708	-37.816	-27.879
28.3486	-42.9654	-41.1553	-27.2239	-37.8042	-27.894
28.3812	-42.9094	-41.1238	-27.1762	-37.7927	-27.9086
28.4138	-42.8518	-41.093	-27.1278	-37.7814	-27.923
28.4465	-42.7928	-41.063	-27.0788	-37.7703	-27.9369
28.4791	-42.7326	-41.0337	-27.0291	-37.7591	-27.9503
28.5117	-42.6713	-41.0051	-26.9789	-37.748	-27.963
28.5444	-42.6092	-40.9771	-26.9282	-37.7366	-27.9751
28.577	-42.5465	-40.9498	-26.8771	-37.7251	-27.9863
28.6097	-42.4833	-40.923	-26.8256	-37.7132	-27.9967
28.6423	-42.4198	-40.8969	-26.774	-37.701	-28.006
28.6749	-42.3562	-40.8714	-26.7222	-37.6883	-28.0142
28.7076	-42.2927	-40.8464	-26.6703	-37.6751	-28.0213
28.7402	-42.2296	-40.8219	-26.6185	-37.6613	-28.0271
28.7728	-42.1669	-40.7979	-26.5667	-37.6469	-28.0315
28.8055	-42.105	-40.7745	-26.5152	-37.6318	-28.0345
28.8381	-42.0439	-40.7515	-26.464	-37.6159	-28.036
28.8708	-41.9838	-40.729	-26.4132	-37.5994	-28.0359
28.9034	-41.9249	-40.7069	-26.3629	-37.582	-28.0342
28.936	-41.8674	-40.6853	-26.3132	-37.5639	-28.0308
28.9687	-41.8113	-40.6641	-26.2641	-37.5449	-28.0257
29.0013	-41.7569	-40.6433	-26.2158	-37.5252	-28.0188
29.0339	-41.7042	-40.623	-26.1683	-37.5046	-28.0101
29.0666	-41.6533	-40.603	-26.1217	-37.4833	-27.9997
29.0992	-41.6043	-40.5834	-26.0761	-37.4612	-27.9875
29.1319	-41.5573	-40.5642	-26.0316	-37.4383	-27.9734
29.1645	-41.5125	-40.5454	-25.9883	-37.4147	-27.9575
29.1971	-41.4697	-40.5269	-25.9461	-37.3905	-27.9399
29.2298	-41.4292	-40.5087	-25.9052	-37.3656	-27.9204
29.2624	-41.3908	-40.4909	-25.8657	-37.34	-27.8992
29.295	-41.3547	-40.4733	-25.8275	-37.314	-27.8763
29.3277	-41.3208	-40.4561	-25.7907	-37.2874	-27.8516
29.3603	-41.2891	-40.439	-25.7555	-37.2604	-27.8253
29.393	-41.2594	-40.4222	-25.7218	-37.2329	-27.7973
29.4256	-41.2319	-40.4056	-25.6897	-37.2051	-27.7678
29.4582	-41.2063	-40.3892	-25.6592	-37.177	-27.7368
29.4909	-41.1826	-40.3729	-25.6305	-37.1486	-27.7042
29.5235	-41.1607	-40.3567	-25.6034	-37.1199	-27.6703
29.5561	-41.1404	-40.3405	-25.5782	-37.0911	-27.635
29.5888	-41.1217	-40.3244	-25.5547	-37.0621	-27.5985
29.6214	-41.1045	-40.3082	-25.5331	-37.033	-27.5607
29.654	-41.0884	-40.2919	-25.5133	-37.0037	-27.5218
29.6867	-41.0736	-40.2755	-25.4955	-36.9744	-27.4819
29.7193	-41.0597	-40.2589	-25.4795	-36.945	-27.441
29.752	-41.0467	-40.242	-25.4655	-36.9156	-27.3993
29.7846	-41.0345	-40.2249	-25.4533	-36.8861	-27.3569
29.8172	-41.0228	-40.2074	-25.4432	-36.8566	-27.3138
29.8499	-41.0116	-40.1896	-25.4349	-36.827	-27.2701
29.8825	-41.0008	-40.1713	-25.4285	-36.7975	-27.2261
29.9151	-40.9903	-40.1525	-25.424	-36.768	-27.1817
29.9478	-40.9799	-40.1332	-25.4214	-36.7384	-27.1371
29.9804	-40.9696	-40.1134	-25.4206	-36.7087	-27.0923
30.0131	-40.9593	-40.0929	-25.4216	-36.679	-27.0476
30.0457	-40.949	-40.0718	-25.4243	-36.6493	-27.003
30.0783	-40.9385	-40.05	-25.4287	-36.6194	-26.9586
30.111	-40.928	-40.0275	-25.4347	-36.5894	-26.9145
30.1436	-40.9172	-40.0042	-25.4423	-36.5592	-26.8708
30.1762	-40.9064	-39.9802	-25.4513	-36.5288	-26.8276
30.2089	-40.8954	-39.9554	-25.4619	-36.4981	-26.7849
30.2415	-40.8842	-39.9298	-25.4737	-36.4672	-26.743
30.2742	-40.873	-39.9033	-25.4869	-36.4359	-26.7018
30.3068	-40.8618	-39.8759	-25.5013	-36.4042	-26.6614
30.3394	-40.8506	-39.8477	-25.5169	-36.372	-26.6219
30.3721	-40.8395	-39.8186	-25.5335	-36.3394	-26.5833
30.4047	-40.8286	-39.7885	-25.5511	-36.3063	-26.5458
30.4373	-40.8179	-39.7576	-25.5696	-36.2726	-26.5093
30.47	-40.8077	-39.7257	-25.5889	-36.2384	-26.4739
30.5026	-40.7979	-39.6929	-25.6088	-36.2035	-26.4396
30.5352	-40.7887	-39.6592	-25.6294	-36.168	-26.4065
30.5679	-40.7802	-39.6246	-25.6504	-36.1318	-26.3746
30.6005	-40.7725	-39.5891	-25.6718	-36.0949	-26.3439
30.6332	-40.7658	-39.5527	-25.6935	-36.0574	-26.3143
30.6658	-40.7602	-39.5155	-25.7154	-36.0192	-26.286
30.6984	-40.7557	-39.4775	-25.7373	-35.9802	-26.2589
30.7311	-40.7526	-39.4388	-25.7592	-35.9406	-26.233
30.7637	-40.7509	-39.3992	-25.7809	-35.9003	-26.2083
30.7963	-40.7509	-39.359	-25.8023	-35.8592	-26.1846
30.829	-40.7525	-39.318	-25.8233	-35.8175	-26.1621
30.8616	-40.756	-39.2765	-25.8438	-35.775	-26.1407
30.8943	-40.7614	-39.2343	-25.8637	-35.7319	-26.1203
30.9269	-40.7689	-39.1916	-25.883	-35.6881	-26.1009
30.9595	-40.7785	-39.1484	-25.9014	-35.6437	-26.0824
30.9922	-40.7905	-39.1048	-25.9189	-35.5986	-26.0648
31.0248	-40.8048	-39.0607	-25.9354	-35.553	-26.0481
31.0574	-40.8215	-39.0163	-25.9509	-35.5067	-26.0323
31.0901	-40.8409	-38.9716	-25.9652	-35.46	-26.0172
31.1227	-40.8628	-38.9267	-25.9782	-35.4128	-26.0028
31.1554	-40.8874	-38.8815	-25.9899	-35.3651	-25.9892
31.188	-40.9148	-38.8363	-26.0002	-35.3171	-25.9762
31.2206	-40.9449	-38.7909	-26.009	-35.2688	-25.9638
31.2533	-40.9778	-38.7455	-26.0163	-35.2202	-25.9521
31.2859	-41.0135	-38.7001	-26.022	-35.1715	-25.9409
31.3185	-41.052	-38.6548	-26.026	-35.1226	-25.9302
31.3512	-41.0932	-38.6096	-26.0284	-35.0737	-25.92
31.3838	-41.1371	-38.5646	-26.0291	-35.0248	-25.9103
31.4164	-41.1836	-38.5197	-26.028	-34.9759	-25.9009
31.4491	-41.2326	-38.4751	-26.0251	-34.9272	-25.892
31.4817	-41.2839	-38.4308	-26.0205	-34.8787	-25.8835
31.5144	-41.3375	-38.3869	-26.0141	-34.8305	-25.8752
31.547	-41.3931	-38.3432	-26.0058	-34.7825	-25.8673
31.5796	-41.4507	-38.3	-25.9959	-34.7349	-25.8596
31.6123	-41.51	-38.2571	-25.9841	-34.6877	-25.8522
31.6449	-41.5709	-38.2147	-25.9706	-34.641	-25.8451
31.6775	-41.6331	-38.1727	-25.9554	-34.5947	-25.8381
31.7102	-41.6965	-38.1311	-25.9385	-34.5489	-25.8314
31.7428	-41.7607	-38.09	-25.92	-34.5037	-25.8249
31.7755	-41.8257	-38.0494	-25.8999	-34.459	-25.8185
31.8081	-41.8911	-38.0092	-25.8783	-34.4149	-25.8123
31.8407	-41.9569	-37.9695	-25.8552	-34.3714	-25.8063
31.8734	-42.0226	-37.9302	-25.8307	-34.3286	-25.8005
31.906	-42.0881	-37.8913	-25.8049	-34.2863	-25.7949
31.9386	-42.1532	-37.8529	-25.7778	-34.2446	-25.7894
31.9713	-42.2177	-37.8149	-25.7495	-34.2035	-25.7842
32.0039	-42.2813	-37.7774	-25.7201	-34.1631	-25.7791
32.0366	-42.3439	-37.7402	-25.6896	-34.1231	-25.7743
32.0692	-42.4051	-37.7034	-25.6581	-34.0838	-25.7696
32.1018	-42.4649	-37.667	-25.6256	-34.045	-25.7653
32.1345	-42.523	-37.6309	-25.5923	-34.0067	-25.7612
32.1671	-42.5792	-37.5952	-25.5583	-33.9688	-25.7574
32.1997	-42.6334	-37.5599	-25.5234	-33.9315	-25.7539
32.2324	-42.6853	-37.5248	-25.4879	-33.8946	-25.7509
32.265	-42.7349	-37.4901	-25.4518	-33.8581	-25.7482
32.2977	-42.7819	-37.4556	-25.4152	-33.822	-25.7459
32.3303	-42.8262	-37.4213	-25.378	-33.7864	-25.7442
32.3629	-42.8678	-37.3873	-25.3404	-33.7511	-25.743
32.3956	-42.9065	-37.3535	-25.3024	-33.7162	-25.7423
32.4282	-42.9422	-37.3198	-25.2641	-33.6816	-25.7423
32.4608	-42.9748	-37.2863	-25.2255	-33.6475	-25.7429
32.4935	-43.0043	-37.2529	-25.1867	-33.6137	-25.7443
32.5261	-43.0306	-37.2197	-25.1476	-33.5803	-25.7464
32.5587	-43.0537	-37.1864	-25.1083	-33.5473	-25.7493
32.5914	-43.0736	-37.1533	-25.069	-33.5147	-25.753
32.624	-43.0902	-37.1202	-25.0295	-33.4825	-25.7576
32.6567	-43.1036	-37.0871	-24.99	-33.4508	-25.7631
32.6893	-43.1138	-37.0541	-24.9504	-33.4195	-25.7695
32.7219	-43.1209	-37.0211	-24.9109	-33.3887	-25.7768
32.7546	-43.1248	-36.9881	-24.8714	-33.3584	-25.7851
32.7872	-43.1257	-36.9552	-24.8319	-33.3286	-25.7943
32.8198	-43.1236	-36.9222	-24.7926	-33.2993	-25.8045
32.8525	-43.1186	-36.8893	-24.7534	-33.2705	-25.8156
32.8851	-43.1108	-36.8565	-24.7143	-33.2422	-25.8277
32.9178	-43.1003	-36.8237	-24.6755	-33.2145	-25.8406
32.9504	-43.0872	-36.791	-24.6368	-33.1873	-25.8545
32.983	-43.0716	-36.7584	-24.5984	-33.1606	-25.8692
33.0157	-43.0537	-36.7259	-24.5602	-33.1345	-25.8847
33.0483	-43.0335	-36.6935	-24.5223	-33.109	-25.901
33.0809	-43.0111	-36.6614	-24.4846	-33.0839	-25.918
33.1136	-42.9868	-36.6295	-24.4473	-33.0595	-25.9357
33.1462	-42.9606	-36.5978	-24.4103	-33.0356	-25.954
33.1789	-42.9326	-36.5664	-24.3736	-33.0123	-25.9727
33.2115	-42.903	-36.5353	-24.3372	-32.9896	-25.992
33.2441	-42.8719	-36.5046	-24.3012	-32.9675	-26.0115
33.2768	-42.8394	-36.4743	-24.2656	-32.946	-26.0314
33.3094	-42.8056	-36.4444	-24.2303	-32.9252	-26.0515
33.342	-42.7706	-36.4151	-24.1954	-32.9049	-26.0717
33.3747	-42.7345	-36.3863	-24.1608	-32.8853	-26.092
33.4073	-42.6974	-36.3582	-24.1268	-32.8663	-26.1122
33.4399	-42.6593	-36.3306	-24.0931	-32.848	-26.1322
33.4726	-42.6204	-36.3038	-24.0599	-32.8303	-26.1521
33.5052	-42.5807	-36.2777	-24.0272	-32.8132	-26.1716
33.5379	-42.5402	-36.2523	-23.995	-32.7967	-26.1908
33.5705	-42.4991	-36.2278	-23.9633	-32.7809	-26.2095
33.6031	-42.4573	-36.2041	-23.9323	-32.7656	-26.2277
33.6358	-42.4149	-36.1812	-23.9018	-32.751	-26.2453
33.6684	-42.372	-36.1592	-23.8719	-32.737	-26.2622
33.701	-42.3287	-36.1381	-23.8427	-32.7235	-26.2784
33.7337	-42.2848	-36.1179	-23.8142	-32.7106	-26.2938
33.7663	-42.2405	-36.0986	-23.7865	-32.6982	-26.3084
33.799	-42.1958	-36.0803	-23.7596	-32.6864	-26.322
33.8316	-42.1508	-36.0628	-23.7335	-32.6749	-26.3347
33.8642	-42.1053	-36.0463	-23.7083	-32.6639	-26.3463
33.8969	-42.0596	-36.0307	-23.6841	-32.6533	-26.3569
33.9295	-42.0135	-36.0161	-23.6609	-32.643	-26.3664
33.9621	-41.9672	-36.0023	-23.6387	-32.6331	-26.3748
33.9948	-41.9206	-35.9894	-23.6177	-32.6233	-26.382
34.0274	-41.8737	-35.9774	-23.5978	-32.6138	-26.388
34.0601	-41.8267	-35.9663	-23.5792	-32.6045	-26.3928
34.0927	-41.7794	-35.956	-23.5619	-32.5953	-26.3963
34.1253	-41.7319	-35.9465	-23.5459	-32.5861	-26.3987
34.158	-41.6842	-35.9378	-23.5313	-32.5771	-26.3997
34.1906	-41.6363	-35.9298	-23.5181	-32.568	-26.3996
34.2232	-41.5882	-35.9226	-23.5064	-32.5589	-26.3981
34.2559	-41.5399	-35.9161	-23.4961	-32.5498	-26.3955
34.2885	-41.4915	-35.9103	-23.4874	-32.5405	-26.3917
34.3211	-41.4428	-35.9051	-23.4802	-32.5313	-26.3867
34.3538	-41.394	-35.9006	-23.4745	-32.5219	-26.3806
34.3864	-41.3449	-35.8966	-23.4703	-32.5124	-26.3734
34.4191	-41.2957	-35.8933	-23.4677	-32.5029	-26.3652
34.4517	-41.2463	-35.8904	-23.4665	-32.4933	-26.3561
34.4843	-41.1967	-35.8881	-23.4669	-32.4837	-26.346
34.517	-41.1469	-35.8862	-23.4687	-32.474	-26.3352
34.5496	-41.097	-35.8847	-23.4719	-32.4644	-26.3237
34.5822	-41.047	-35.8836	-23.4764	-32.4547	-26.3115
34.6149	-40.9968	-35.8829	-23.4822	-32.4451	-26.2987
34.6475	-40.9467	-35.8825	-23.4893	-32.4356	-26.2855
34.6802	-40.8965	-35.8823	-23.4975	-32.4262	-26.272
34.7128	-40.8464	-35.8824	-23.5069	-32.417	-26.2581
34.7454	-40.7963	-35.8826	-23.5173	-32.408	-26.2441
34.7781	-40.7465	-35.8829	-23.5286	-32.3991	-26.23
34.8107	-40.6969	-35.8834	-23.5409	-32.3905	-26.2159
34.8433	-40.6476	-35.8839	-23.5539	-32.3822	-26.2019
34.876	-40.5986	-35.8844	-23.5678	-32.3741	-26.188
34.9086	-40.5501	-35.8849	-23.5823	-32.3664	-26.1745
34.9413	-40.5022	-35.8854	-23.5974	-32.3589	-26.1613
34.9739	-40.4549	-35.8858	-23.6131	-32.3518	-26.1485
35.0065	-40.4082	-35.8861	-23.6292	-32.3451	-26.1363
35.0392	-40.3622	-35.8863	-23.6457	-32.3387	-26.1246
35.0718	-40.3171	-35.8864	-23.6626	-32.3326	-26.1136
35.1044	-40.2729	-35.8864	-23.6797	-32.3269	-26.1033
35.1371	-40.2295	-35.8862	-23.697	-32.3216	-26.0937
35.1697	-40.1872	-35.8858	-23.7144	-32.3166	-26.0849
35.2023	-40.1459	-35.8853	-23.7318	-32.3119	-26.077
35.235	-40.1057	-35.8846	-23.7492	-32.3076	-26.07
35.2676	-40.0666	-35.8837	-23.7665	-32.3036	-26.0638
35.3003	-40.0286	-35.8827	-23.7836	-32.3	-26.0586
35.3329	-39.9918	-35.8815	-23.8004	-32.2966	-26.0544
35.3655	-39.9562	-35.8802	-23.817	-32.2935	-26.0511
35.3982	-39.9218	-35.8787	-23.8332	-32.2906	-26.0488
35.4308	-39.8886	-35.8772	-23.8489	-32.288	-26.0475
35.4634	-39.8567	-35.8756	-23.8642	-32.2855	-26.0472
35.4961	-39.8259	-35.874	-23.879	-32.2832	-26.0479
35.5287	-39.7964	-35.8723	-23.8932	-32.2811	-26.0495
35.5614	-39.7681	-35.8707	-23.9068	-32.279	-26.0522
35.594	-39.741	-35.8691	-23.9199	-32.277	-26.0558
35.6266	-39.7152	-35.8676	-23.9323	-32.275	-26.0603
35.6593	-39.6906	-35.8661	-23.944	-32.273	-26.0659
35.6919	-39.6673	-35.8648	-23.9551	-32.271	-26.0723
35.7245	-39.6451	-35.8636	-23.9655	-32.2688	-26.0797
35.7572	-39.6242	-35.8625	-23.9752	-32.2665	-26.0879
35.7898	-39.6045	-35.8616	-23.9843	-32.264	-26.097
35.8225	-39.5859	-35.8609	-23.9926	-32.2612	-26.107
35.8551	-39.5685	-35.8603	-24.0003	-32.2581	-26.1178
35.8877	-39.5523	-35.8599	-24.0074	-32.2546	-26.1294
35.9204	-39.5372	-35.8597	-24.0138	-32.2506	-26.1418
35.953	-39.5233	-35.8597	-24.0196	-32.2461	-26.1549
35.9856	-39.5104	-35.8598	-24.0248	-32.2409	-26.1688
36.0183	-39.4985	-35.8601	-24.0295	-32.2351	-26.1833
36.0509	-39.4878	-35.8605	-24.0336	-32.2285	-26.1984
36.0836	-39.478	-35.861	-24.0372	-32.221	-26.2141
36.1162	-39.4692	-35.8615	-24.0403	-32.2126	-26.2304
36.1488	-39.4613	-35.8622	-24.0429	-32.2032	-26.2472
36.1815	-39.4544	-35.8628	-24.0451	-32.1927	-26.2644
36.2141	-39.4483	-35.8634	-24.0469	-32.1811	-26.282
36.2467	-39.4431	-35.8639	-24.0483	-32.1682	-26.3
36.2794	-39.4388	-35.8644	-24.0494	-32.1541	-26.3182
36.312	-39.4352	-35.8647	-24.0501	-32.1386	-26.3367
36.3446	-39.4324	-35.865	-24.0505	-32.1217	-26.3554
36.3773	-39.4303	-35.865	-24.0506	-32.1035	-26.3743
36.4099	-39.4289	-35.8648	-24.0505	-32.0838	-26.3932
36.4426	-39.4283	-35.8645	-24.0501	-32.0627	-26.4123
36.4752	-39.4284	-35.8638	-24.0495	-32.0401	-26.4313
36.5078	-39.4291	-35.8629	-24.0486	-32.0162	-26.4503
36.5405	-39.4306	-35.8617	-24.0476	-31.9907	-26.4692
36.5731	-39.4327	-35.8601	-24.0463	-31.9639	-26.4881
36.6057	-39.4356	-35.8582	-24.0449	-31.9357	-26.5068
36.6384	-39.4393	-35.8559	-24.0432	-31.9062	-26.5254
36.671	-39.4437	-35.8531	-24.0414	-31.8754	-26.5437
36.7037	-39.4489	-35.8498	-24.0393	-31.8434	-26.5618
36.7363	-39.4548	-35.846	-24.037	-31.8102	-26.5797
36.7689	-39.4616	-35.8416	-24.0345	-31.7759	-26.5973
36.8016	-39.4692	-35.8365	-24.0318	-31.7406	-26.6146
36.8342	-39.4777	-35.8308	-24.0289	-31.7043	-26.6315
36.8668	-39.487	-35.8243	-24.0258	-31.6672	-26.6481
36.8995	-39.4972	-35.8171	-24.0225	-31.6292	-26.6643
36.9321	-39.5083	-35.809	-24.019	-31.5906	-26.6801
36.9648	-39.5203	-35.8	-24.0153	-31.5514	-26.6955
36.9974	-39.5332	-35.7901	-24.0114	-31.5117	-26.7105
37.03	-39.547	-35.7793	-24.0073	-31.4715	-26.725
37.0627	-39.5617	-35.7674	-24.0031	-31.431	-26.7391
37.0953	-39.5773	-35.7546	-23.9987	-31.3903	-26.7527
37.1279	-39.5938	-35.7406	-23.9942	-31.3494	-26.7658
37.1606	-39.6111	-35.7256	-23.9896	-31.3085	-26.7784
37.1932	-39.6293	-35.7095	-23.9849	-31.2676	-26.7905
37.2258	-39.6484	-35.6922	-23.9801	-31.2268	-26.8021
37.2585	-39.6682	-35.6739	-23.9753	-31.1862	-26.8131
37.2911	-39.6888	-35.6544	-23.9704	-31.1459	-26.8235
37.3238	-39.7101	-35.6338	-23.9656	-31.1059	-26.8334
37.3564	-39.7321	-35.6121	-23.9607	-31.0663	-26.8426
37.389	-39.7547	-35.5893	-23.9559	-31.0272	-26.8513
37.4217	-39.7779	-35.5655	-23.9511	-30.9887	-26.8593
37.4543	-39.8016	-35.5407	-23.9464	-30.9508	-26.8668
37.4869	-39.8258	-35.5149	-23.9417	-30.9135	-26.8736
37.5196	-39.8504	-35.4883	-23.9372	-30.877	-26.8798
37.5522	-39.8754	-35.4608	-23.9329	-30.8412	-26.8853
37.5849	-39.9006	-35.4326	-23.9287	-30.8063	-26.8903
37.6175	-39.9261	-35.4038	-23.9248	-30.7723	-26.8946
37.6501	-39.9516	-35.3743	-23.9211	-30.7393	-26.8983
37.6828	-39.9773	-35.3444	-23.9177	-30.7072	-26.9014
37.7154	-40.0029	-35.314	-23.9145	-30.6761	-26.904
37.748	-40.0285	-35.2833	-23.9117	-30.6461	-26.906
37.7807	-40.054	-35.2524	-23.9092	-30.6173	-26.9074
37.8133	-40.0792	-35.2214	-23.9071	-30.5895	-26.9084
37.846	-40.1041	-35.1903	-23.9054	-30.563	-26.9088
37.8786	-40.1287	-35.1592	-23.9042	-30.5376	-26.9088
37.9112	-40.1529	-35.1282	-23.9033	-30.5134	-26.9083
37.9439	-40.1765	-35.0974	-23.903	-30.4904	-26.9074
37.9765	-40.1996	-35.067	-23.9031	-30.4687	-26.9061
38.0091	-40.222	-35.0368	-23.9037	-30.4482	-26.9044
38.0418	-40.2437	-35.0071	-23.9048	-30.4289	-26.9024
38.0744	-40.2647	-34.9779	-23.9064	-30.4108	-26.9001
38.107	-40.2847	-34.9492	-23.9084	-30.3938	-26.8976
38.1397	-40.3039	-34.9211	-23.911	-30.3781	-26.8948
38.1723	-40.3221	-34.8937	-23.9139	-30.3634	-26.8917
38.205	-40.3394	-34.867	-23.9173	-30.3498	-26.8885
38.2376	-40.3555	-34.841	-23.9211	-30.3372	-26.8852
38.2702	-40.3706	-34.8159	-23.9253	-30.3257	-26.8817
38.3029	-40.3846	-34.7916	-23.9298	-30.315	-26.8781
38.3355	-40.3975	-34.7681	-23.9346	-30.3053	-26.8745
38.3681	-40.4092	-34.7456	-23.9397	-30.2965	-26.8707
38.4008	-40.4198	-34.724	-23.9451	-30.2885	-26.867
38.4334	-40.4294	-34.7034	-23.9506	-30.2813	-26.8632
38.4661	-40.4378	-34.6837	-23.9563	-30.2748	-26.8594
38.4987	-40.4453	-34.665	-23.9621	-30.2691	-26.8556
38.5313	-40.4518	-34.6473	-23.968	-30.264	-26.8518
38.564	-40.4574	-34.6306	-23.9741	-30.2596	-26.8479
38.5966	-40.4622	-34.615	-23.9801	-30.2559	-26.8441
38.6292	-40.4662	-34.6003	-23.9862	-30.2527	-26.8402
38.6619	-40.4695	-34.5866	-23.9923	-30.25	-26.8364
38.6945	-40.4723	-34.5739	-23.9983	-30.248	-26.8325
38.7272	-40.4745	-34.5621	-24.0043	-30.2465	-26.8285
38.7598	-40.4763	-34.5512	-24.0102	-30.2455	-26.8246
38.7924	-40.4778	-34.5412	-24.0161	-30.2451	-26.8205
38.8251	-40.479	-34.5321	-24.0217	-30.2452	-26.8165
38.8577	-40.4801	-34.5238	-24.0273	-30.2458	-26.8124
38.8903	-40.4811	-34.5162	-24.0327	-30.247	-26.8082
38.923	-40.4822	-34.5094	-24.0379	-30.2487	-26.804
38.9556	-40.4834	-34.5032	-24.0429	-30.251	-26.7998
38.9883	-40.4848	-34.4977	-24.0477	-30.2538	-26.7955
39.0209	-40.4865	-34.4927	-24.0523	-30.2573	-26.7912
39.0535	-40.4885	-34.4882	-24.0566	-30.2613	-26.7869
39.0862	-40.4911	-34.4842	-24.0607	-30.266	-26.7825
39.1188	-40.4941	-34.4807	-24.0645	-30.2713	-26.7781
39.1514	-40.4978	-34.4774	-24.068	-30.2772	-26.7738
39.1841	-40.5021	-34.4745	-24.0712	-30.2837	-26.7694
39.2167	-40.507	-34.4719	-24.0741	-30.2909	-26.7651
39.2493	-40.5128	-34.4694	-24.0767	-30.2987	-26.7607
39.282	-40.5192	-34.4671	-24.079	-30.3071	-26.7564
39.3146	-40.5265	-34.465	-24.081	-30.3161	-26.7522
39.3473	-40.5346	-34.4629	-24.0827	-30.3258	-26.748
39.3799	-40.5435	-34.4609	-24.0841	-30.3361	-26.7438
39.4125	-40.5532	-34.4589	-24.0853	-30.3469	-26.7397
39.4452	-40.5637	-34.4569	-24.0861	-30.3583	-26.7357
39.4778	-40.5749	-34.4549	-24.0867	-30.3703	-26.7318
39.5104	-40.5869	-34.4529	-24.087	-30.3828	-26.7279
39.5431	-40.5995	-34.4509	-24.0871	-30.3959	-26.7241
39.5757	-40.6127	-34.4489	-24.087	-30.4094	-26.7204
39.6084	-40.6265	-34.4469	-24.0866	-30.4235	-26.7168
39.641	-40.6408	-34.445	-24.0861	-30.438	-26.7134
39.6736	-40.6554	-34.4432	-24.0853	-30.453	-26.7101
39.7063	-40.6704	-34.4416	-24.0844	-30.4684	-26.707
39.7389	-40.6856	-34.4401	-24.0833	-30.4842	-26.7041
39.7715	-40.701	-34.4388	-24.082	-30.5005	-26.7014
39.8042	-40.7164	-34.4378	-24.0805	-30.5171	-26.699
39.8368	-40.7319	-34.4371	-24.079	-30.5342	-26.6969
39.8695	-40.7472	-34.4368	-24.0772	-30.5516	-26.6952
39.9021	-40.7624	-34.4369	-24.0753	-30.5694	-26.6938
39.9347	-40.7773	-34.4375	-24.0733	-30.5875	-26.693
39.9674	-40.7919	-34.4387	-24.0712	-30.6059	-26.6926
40	-40.8061	-34.4406	-24.0689	-30.6247	-26.6928
40.0326	-40.8197	-34.4431	-24.0665	-30.6437	-26.6936
40.0653	-40.8328	-34.4464	-24.064	-30.663	-26.6951
40.0979	-40.8453	-34.4505	-24.0614	-30.6826	-26.6973
40.1305	-40.857	-34.4555	-24.0587	-30.7024	-26.7004
40.1632	-40.868	-34.4614	-24.0559	-30.7224	-26.7042
40.1958	-40.8782	-34.4684	-24.0531	-30.7425	-26.7091
40.2285	-40.8874	-34.4764	-24.0501	-30.7629	-26.7148
40.2611	-40.8958	-34.4856	-24.0472	-30.7833	-26.7217
40.2937	-40.9031	-34.496	-24.0442	-30.8038	-26.7296
40.3264	-40.9094	-34.5076	-24.0411	-30.8244	-26.7387
40.359	-40.9147	-34.5205	-24.0381	-30.8449	-26.749
40.3916	-40.9189	-34.5347	-24.035	-30.8655	-26.7605
40.4243	-40.9221	-34.5503	-24.032	-30.8859	-26.7732
40.4569	-40.9241	-34.5672	-24.029	-30.9063	-26.7873
40.4896	-40.9251	-34.5854	-24.026	-30.9265	-26.8027
40.5222	-40.925	-34.605	-24.023	-30.9466	-26.8194
40.5548	-40.9239	-34.626	-24.0201	-30.9663	-26.8375
40.5875	-40.9219	-34.6482	-24.0173	-30.9858	-26.8569
40.6201	-40.9189	-34.6718	-24.0145	-31.005	-26.8777
40.6527	-40.9151	-34.6966	-24.0117	-31.0238	-26.8997
40.6854	-40.9104	-34.7226	-24.009	-31.0421	-26.9231
40.718	-40.9051	-34.7498	-24.0065	-31.0599	-26.9477
40.7507	-40.8992	-34.7781	-24.004	-31.0773	-26.9736
40.7833	-40.8927	-34.8074	-24.0016	-31.094	-27.0006
40.8159	-40.8859	-34.8377	-23.9993	-31.1102	-27.0288
40.8486	-40.8787	-34.8688	-23.9972	-31.1257	-27.0582
40.8812	-40.8713	-34.9008	-23.9952	-31.1406	-27.0886
40.9138	-40.8639	-34.9335	-23.9933	-31.1548	-27.1199
40.9465	-40.8566	-34.9669	-23.9917	-31.1682	-27.1523
40.9791	-40.8495	-35.0008	-23.9902	-31.1809	-27.1854
41.0117	-40.8426	-35.0352	-23.9889	-31.1929	-27.2194
41.0444	-40.8363	-35.07	-23.9879	-31.2042	-27.2541
41.077	-40.8305	-35.1051	-23.9871	-31.2146	-27.2894
41.1097	-40.8254	-35.1403	-23.9865	-31.2243	-27.3252
41.1423	-40.8212	-35.1757	-23.9863	-31.2332	-27.3615
41.1749	-40.8179	-35.211	-23.9864	-31.2414	-27.3982
41.2076	-40.8157	-35.2462	-23.9868	-31.2488	-27.4351
41.2402	-40.8147	-35.2812	-23.9875	-31.2554	-27.4723
41.2728	-40.8149	-35.3158	-23.9887	-31.2612	-27.5096
41.3055	-40.8164	-35.35	-23.9903	-31.2664	-27.5469
41.3381	-40.8195	-35.3836	-23.9923	-31.2708	-27.5841
41.3708	-40.8239	-35.4165	-23.9948	-31.2745	-27.6212
41.4034	-40.83	-35.4486	-23.9978	-31.2775	-27.6581
41.436	-40.8376	-35.4798	-24.0014	-31.2798	-27.6946
41.4687	-40.8468	-35.51	-24.0055	-31.2816	-27.7307
41.5013	-40.8577	-35.5392	-24.0102	-31.2828	-27.7662
41.5339	-40.8701	-35.5671	-24.0154	-31.2834	-27.8012
41.5666	-40.8841	-35.5937	-24.0213	-31.2836	-27.8354
41.5992	-40.8997	-35.619	-24.0278	-31.2833	-27.8689
41.6319	-40.9168	-35.6428	-24.035	-31.2826	-27.9015
41.6645	-40.9353	-35.6652	-24.0428	-31.2816	-27.9332
41.6971	-40.9552	-35.686	-24.0512	-31.2803	-27.9639
41.7298	-40.9765	-35.7053	-24.0603	-31.2788	-27.9935
41.7624	-40.9989	-35.723	-24.0701	-31.2771	-28.022
41.795	-41.0226	-35.7391	-24.0804	-31.2754	-28.0493
41.8277	-41.0473	-35.7537	-24.0914	-31.2736	-28.0754
41.8603	-41.073	-35.7666	-24.1029	-31.2719	-28.1003
41.893	-41.0997	-35.7781	-24.115	-31.2703	-28.1239
41.9256	-41.1271	-35.788	-24.1276	-31.2689	-28.1462
41.9582	-41.1553	-35.7965	-24.1407	-31.2678	-28.1673
41.9909	-41.1841	-35.8035	-24.1543	-31.267	-28.1871
42.0235	-41.2134	-35.8092	-24.1682	-31.2666	-28.2056
42.0561	-41.2432	-35.8137	-24.1826	-31.2667	-28.2228
42.0888	-41.2733	-35.817	-24.1972	-31.2673	-28.2389
42.1214	-41.3037	-35.8191	-24.2121	-31.2685	-28.2538
42.154	-41.3343	-35.8203	-24.2273	-31.2704	-28.2676
42.1867	-41.365	-35.8207	-24.2428	-31.273	-28.2803
42.2193	-41.3957	-35.8202	-24.2584	-31.2764	-28.292
42.252	-41.4263	-35.8191	-24.2741	-31.2806	-28.3028
42.2846	-41.4567	-35.8175	-24.29	-31.2857	-28.3128
42.3172	-41.4869	-35.8154	-24.306	-31.2917	-28.322
42.3499	-41.5168	-35.8131	-24.3221	-31.2987	-28.3305
42.3825	-41.5463	-35.8107	-24.3382	-31.3066	-28.3384
42.4151	-41.5754	-35.8082	-24.3543	-31.3156	-28.3457
42.4478	-41.6039	-35.8059	-24.3704	-31.3256	-28.3526
42.4804	-41.6318	-35.8038	-24.3865	-31.3367	-28.3591
42.5131	-41.6592	-35.802	-24.4025	-31.3488	-28.3653
42.5457	-41.6858	-35.8007	-24.4184	-31.3621	-28.3713
42.5783	-41.7118	-35.8	-24.4342	-31.3764	-28.377
42.611	-41.7371	-35.7999	-24.4498	-31.3918	-28.3827
42.6436	-41.7616	-35.8006	-24.4653	-31.4082	-28.3882
42.6762	-41.7855	-35.8021	-24.4805	-31.4257	-28.3938
42.7089	-41.8087	-35.8045	-24.4956	-31.4442	-28.3993
42.7415	-41.8312	-35.8079	-24.5104	-31.4637	-28.4049
42.7742	-41.853	-35.8122	-24.5249	-31.4842	-28.4106
42.8068	-41.8743	-35.8176	-24.5392	-31.5056	-28.4164
42.8394	-41.8949	-35.824	-24.5532	-31.5279	-28.4224
42.8721	-41.9151	-35.8316	-24.5669	-31.5511	-28.4285
42.9047	-41.9347	-35.8402	-24.5804	-31.5751	-28.4348
42.9373	-41.954	-35.85	-24.5935	-31.5999	-28.4413
42.97	-41.9731	-35.8609	-24.6064	-31.6255	-28.4479
43.0026	-41.9919	-35.8728	-24.619	-31.6517	-28.4547
43.0352	-42.0106	-35.8859	-24.6313	-31.6787	-28.4617
43.0679	-42.0293	-35.9001	-24.6434	-31.7062	-28.4689
43.1005	-42.0482	-35.9153	-24.6552	-31.7343	-28.4762
43.1332	-42.0673	-35.9316	-24.667	-31.7629	-28.4836
43.1658	-42.0868	-35.9488	-24.6785	-31.792	-28.4912
43.1984	-42.1067	-35.967	-24.69	-31.8215	-28.4988
43.2311	-42.1273	-35.9861	-24.7015	-31.8512	-28.5065
43.2637	-42.1486	-36.0061	-24.7129	-31.8813	-28.5142
43.2963	-42.1708	-36.0269	-24.7244	-31.9116	-28.522
43.329	-42.1939	-36.0484	-24.736	-31.942	-28.5298
43.3616	-42.2181	-36.0707	-24.7478	-31.9724	-28.5375
43.3943	-42.2435	-36.0935	-24.7599	-32.0029	-28.5452
43.4269	-42.2701	-36.117	-24.7722	-32.0333	-28.5528
43.4595	-42.2982	-36.1409	-24.7848	-32.0635	-28.5603
43.4922	-42.3277	-36.1652	-24.7978	-32.0936	-28.5677
43.5248	-42.3588	-36.1898	-24.8112	-32.1235	-28.5749
43.5574	-42.3914	-36.2147	-24.8252	-32.1531	-28.5819
43.5901	-42.4257	-36.2398	-24.8396	-32.1825	-28.5888
43.6227	-42.4618	-36.2651	-24.8546	-32.2114	-28.5954
43.6554	-42.4995	-36.2904	-24.8702	-32.24	-28.6018
43.688	-42.5391	-36.3157	-24.8864	-32.2682	-28.6079
43.7206	-42.5804	-36.341	-24.9033	-32.296	-28.6137
43.7533	-42.6235	-36.3662	-24.9208	-32.3234	-28.6193
43.7859	-42.6685	-36.3914	-24.9391	-32.3504	-28.6246
43.8185	-42.7152	-36.4164	-24.9581	-32.3769	-28.6296
43.8512	-42.7637	-36.4412	-24.9777	-32.4031	-28.6344
43.8838	-42.814	-36.4659	-24.9981	-32.4289	-28.6389
43.9164	-42.8661	-36.4904	-25.0192	-32.4543	-28.6431
43.9491	-42.9198	-36.5148	-25.041	-32.4794	-28.6471
43.9817	-42.9752	-36.5391	-25.0635	-32.5042	-28.6508
44.0144	-43.0321	-36.5632	-25.0867	-32.5287	-28.6543
44.047	-43.0906	-36.5871	-25.1105	-32.553	-28.6577
44.0796	-43.1506	-36.6111	-25.1349	-32.5772	-28.6609
44.1123	-43.2119	-36.6349	-25.16	-32.6012	-28.6641
44.1449	-43.2745	-36.6588	-25.1856	-32.6251	-28.6672
44.1775	-43.3384	-36.6828	-25.2118	-32.6489	-28.6704
44.2102	-43.4034	-36.7068	-25.2384	-32.6728	-28.6736
44.2428	-43.4694	-36.7311	-25.2656	-32.6967	-28.6771
44.2755	-43.5365	-36.7556	-25.2932	-32.7208	-28.6808
44.3081	-43.6044	-36.7804	-25.3212	-32.745	-28.6849
44.3407	-43.6731	-36.8057	-25.3495	-32.7694	-28.6894
44.3734	-43.7426	-36.8314	-25.3782	-32.7941	-28.6944
44.406	-43.8128	-36.8578	-25.4071	-32.8191	-28.7002
44.4386	-43.8835	-36.8848	-25.4363	-32.8445	-28.7066
44.4713	-43.9547	-36.9126	-25.4656	-32.8702	-28.7139
44.5039	-44.0264	-36.9413	-25.495	-32.8964	-28.7222
44.5366	-44.0985	-36.9709	-25.5245	-32.9231	-28.7316
44.5692	-44.1708	-37.0016	-25.554	-32.9503	-28.7421
44.6018	-44.2434	-37.0335	-25.5835	-32.9779	-28.7538
44.6345	-44.3162	-37.0665	-25.6129	-33.0061	-28.7669
44.6671	-44.389	-37.1009	-25.6422	-33.0349	-28.7815
44.6997	-44.4619	-37.1367	-25.6714	-33.0642	-28.7975
44.7324	-44.5347	-37.1739	-25.7003	-33.0941	-28.8152
44.765	-44.6073	-37.2125	-25.7291	-33.1246	-28.8345
44.7977	-44.6798	-37.2527	-25.7576	-33.1556	-28.8555
44.8303	-44.7519	-37.2945	-25.7859	-33.1873	-28.8783
44.8629	-44.8237	-37.3378	-25.8139	-33.2195	-28.9029
44.8956	-44.8951	-37.3828	-25.8415	-33.2523	-28.9293
44.9282	-44.9659	-37.4293	-25.8688	-33.2856	-28.9576
44.9608	-45.0362	-37.4775	-25.8957	-33.3195	-28.9878
44.9935	-45.1059	-37.5272	-25.9223	-33.354	-29.02
45.0261	-45.1749	-37.5785	-25.9484	-33.389	-29.0541
45.0587	-45.2431	-37.6312	-25.9742	-33.4245	-29.0901
45.0914	-45.3106	-37.6855	-25.9995	-33.4604	-29.128
45.124	-45.3773	-37.7411	-26.0244	-33.4968	-29.1679
45.1567	-45.4431	-37.7981	-26.0489	-33.5336	-29.2097
45.1893	-45.5081	-37.8563	-26.073	-33.5708	-29.2534
45.2219	-45.5722	-37.9157	-26.0967	-33.6082	-29.299
45.2546	-45.6353	-37.9763	-26.1199	-33.6459	-29.3464
45.2872	-45.6976	-38.0378	-26.1428	-33.6837	-29.3956
45.3198	-45.7588	-38.1002	-26.1654	-33.7216	-29.4465
45.3525	-45.8192	-38.1635	-26.1875	-33.7595	-29.4991
45.3851	-45.8785	-38.2275	-26.2094	-33.7973	-29.5534
45.4178	-45.937	-38.2921	-26.231	-33.8349	-29.6093
45.4504	-45.9944	-38.3572	-26.2524	-33.8722	-29.6667
45.483	-46.0509	-38.4226	-26.2736	-33.9092	-29.7255
45.5157	-46.1065	-38.4884	-26.2946	-33.9456	-29.7858
45.5483	-46.1611	-38.5542	-26.3155	-33.9815	-29.8474
45.5809	-46.2148	-38.6202	-26.3364	-34.0167	-29.9102
45.6136	-46.2676	-38.686	-26.3573	-34.0512	-29.9743
45.6462	-46.3195	-38.7517	-26.3782	-34.0847	-30.0395
45.6789	-46.3705	-38.817	-26.3991	-34.1173	-30.1058
45.7115	-46.4206	-38.8819	-26.4203	-34.1488	-30.1731
45.7441	-46.4699	-38.9463	-26.4416	-34.1792	-30.2413
45.7768	-46.5183	-39.01	-26.4632	-34.2084	-30.3105
45.8094	-46.5659	-39.073	-26.485	-34.2362	-30.3804
45.842	-46.6127	-39.135	-26.5071	-34.2627	-30.4512
45.8747	-46.6587	-39.1961	-26.5296	-34.2878	-30.5227
45.9073	-46.7039	-39.2561	-26.5525	-34.3113	-30.5948
45.9399	-46.7484	-39.3148	-26.5758	-34.3332	-30.6675
45.9726	-46.7921	-39.3722	-26.5995	-34.3535	-30.7408
46.0052	-46.8351	-39.4282	-26.6237	-34.3722	-30.8145
46.0379	-46.8773	-39.4826	-26.6483	-34.3891	-30.8887
46.0705	-46.9188	-39.5354	-26.6734	-34.4044	-30.9633
46.1031	-46.9595	-39.5864	-26.6991	-34.4179	-31.0382
46.1358	-46.9994	-39.6356	-26.7252	-34.4296	-31.1134
46.1684	-47.0384	-39.6828	-26.7519	-34.4395	-31.1888
46.201	-47.0767	-39.7281	-26.7791	-34.4478	-31.2644
46.2337	-47.1141	-39.7713	-26.8067	-34.4543	-31.3402
46.2663	-47.1506	-39.8124	-26.8349	-34.459	-31.4161
46.299	-47.1862	-39.8513	-26.8635	-34.4621	-31.492
46.3316	-47.2209	-39.8879	-26.8926	-34.4635	-31.568
46.3642	-47.2547	-39.9223	-26.9222	-34.4633	-31.644
46.3969	-47.2874	-39.9545	-26.9521	-34.4615	-31.72
46.4295	-47.3191	-39.9843	-26.9824	-34.4581	-31.7959
46.4621	-47.3498	-40.0118	-27.0131	-34.4533	-31.8717
46.4948	-47.3795	-40.0371	-27.044	-34.4469	-31.9475
46.5274	-47.408	-40.06	-27.0753	-34.4392	-32.0232
46.5601	-47.4354	-40.0807	-27.1067	-34.43	-32.0987
46.5927	-47.4617	-40.0991	-27.1384	-34.4196	-32.1742
46.6253	-47.4867	-40.1153	-27.1702	-34.4078	-32.2495
46.658	-47.5105	-40.1293	-27.2022	-34.3948	-32.3247
46.6906	-47.5329	-40.1412	-27.2342	-34.3806	-32.3997
46.7232	-47.5541	-40.151	-27.2662	-34.3652	-32.4746
46.7559	-47.5738	-40.1587	-27.2982	-34.3488	-32.5494
46.7885	-47.592	-40.1644	-27.3302	-34.3313	-32.624
46.8211	-47.6087	-40.168	-27.362	-34.3127	-32.6984
46.8538	-47.6238	-40.1698	-27.3937	-34.2932	-32.7727
46.8864	-47.6371	-40.1696	-27.4252	-34.2728	-32.8468
46.9191	-47.6488	-40.1675	-27.4564	-34.2515	-32.9207
46.9517	-47.6586	-40.1636	-27.4873	-34.2294	-32.9943
46.9843	-47.6664	-40.1578	-27.5179	-34.2066	-33.0678
47.017	-47.6723	-40.1502	-27.548	-34.1829	-33.1411
47.0496	-47.6761	-40.1408	-27.5776	-34.1586	-33.2141
47.0822	-47.6777	-40.1296	-27.6067	-34.1336	-33.2868
47.1149	-47.6771	-40.1166	-27.6353	-34.108	-33.3593
47.1475	-47.6741	-40.1019	-27.6631	-34.0818	-33.4314
47.1802	-47.6687	-40.0853	-27.6903	-34.055	-33.5032
47.2128	-47.6607	-40.0669	-27.7167	-34.0277	-33.5745
47.2454	-47.6501	-40.0466	-27.7422	-33.9999	-33.6455
47.2781	-47.6369	-40.0245	-27.767	-33.9716	-33.7159
47.3107	-47.6208	-40.0005	-27.7908	-33.9427	-33.7858
47.3433	-47.6019	-39.9747	-27.8137	-33.9135	-33.8551
47.376	-47.5801	-39.9469	-27.8356	-33.8837	-33.9238
47.4086	-47.5553	-39.9172	-27.8565	-33.8535	-33.9918
47.4413	-47.5275	-39.8854	-27.8764	-33.8228	-34.0591
47.4739	-47.4965	-39.8517	-27.8951	-33.7917	-34.1256
47.5065	-47.4625	-39.816	-27.9128	-33.76	-34.1912
47.5392	-47.4251	-39.7782	-27.9294	-33.7277	-34.2559
47.5718	-47.3846	-39.7384	-27.9449	-33.6949	-34.3197
47.6044	-47.3408	-39.6964	-27.9593	-33.6614	-34.3825
47.6371	-47.2937	-39.6524	-27.9725	-33.6272	-34.4442
47.6697	-47.2433	-39.6062	-27.9847	-33.5922	-34.5049
47.7023	-47.1895	-39.5579	-27.9957	-33.5564	-34.5644
47.735	-47.1324	-39.5074	-28.0057	-33.5197	-34.6228
47.7676	-47.0719	-39.4547	-28.0146	-33.482	-34.68
47.8003	-47.0081	-39.3999	-28.0224	-33.4433	-34.736
47.8329	-46.941	-39.3428	-28.0292	-33.4033	-34.7907
47.8655	-46.8707	-39.2835	-28.035	-33.362	-34.8442
47.8982	-46.7971	-39.222	-28.0398	-33.3194	-34.8964
47.9308	-46.7203	-39.1582	-28.0436	-33.2752	-34.9472
47.9634	-46.6403	-39.0921	-28.0464	-33.2294	-34.9967
47.9961	-46.5573	-39.0238	-28.0484	-33.1819	-35.0449
48.0287	-46.4714	-38.9531	-28.0494	-33.1325	-35.0917
48.0614	-46.3824	-38.88	-28.0496	-33.0812	-35.1371
48.094	-46.2907	-38.8046	-28.0489	-33.0278	-35.1811
48.1266	-46.1961	-38.7267	-28.0474	-32.9723	-35.2237
48.1593	-46.0989	-38.6464	-28.045	-32.9145	-35.2648
48.1919	-45.9991	-38.5636	-28.0419	-32.8543	-35.3045
48.2245	-45.8968	-38.4784	-28.038	-32.7917	-35.3426
48.2572	-45.7921	-38.3906	-28.0334	-32.7266	-35.3793
48.2898	-45.6851	-38.3003	-28.028	-32.6589	-35.4145
48.3225	-45.5759	-38.2074	-28.022	-32.5886	-35.4482
48.3551	-45.4646	-38.112	-28.0152	-32.5157	-35.4802
48.3877	-45.3512	-38.014	-28.0078	-32.44	-35.5107
48.4204	-45.236	-37.9134	-27.9997	-32.3617	-35.5396
48.453	-45.119	-37.8104	-27.9909	-32.2806	-35.5668
48.4856	-45.0004	-37.7048	-27.9815	-32.1967	-35.5924
48.5183	-44.8802	-37.5967	-27.9715	-32.1101	-35.6163
48.5509	-44.7585	-37.4862	-27.9609	-32.0208	-35.6384
48.5836	-44.6356	-37.3732	-27.9496	-31.9287	-35.6589
48.6162	-44.5115	-37.2579	-27.9378	-31.8339	-35.6775
48.6488	-44.3863	-37.1403	-27.9254	-31.7365	-35.6944
48.6815	-44.2601	-37.0205	-27.9124	-31.6364	-35.7095
48.7141	-44.1331	-36.8985	-27.8988	-31.5337	-35.7227
48.7467	-44.0054	-36.7743	-27.8847	-31.4285	-35.734
48.7794	-43.877	-36.6481	-27.87	-31.3208	-35.7435
48.812	-43.7481	-36.5199	-27.8547	-31.2107	-35.751
48.8446	-43.6188	-36.3898	-27.8389	-31.0983	-35.7565
48.8773	-43.4891	-36.258	-27.8226	-30.9835	-35.7601
48.9099	-43.3593	-36.1243	-27.8057	-30.8666	-35.7616
48.9426	-43.2293	-35.9891	-27.7883	-30.7477	-35.7611
48.9752	-43.0993	-35.8522	-27.7703	-30.6268	-35.7585
49.0078	-42.9693	-35.7139	-27.7519	-30.5041	-35.7538
49.0405	-42.8395	-35.5742	-27.7328	-30.3797	-35.7471
49.0731	-42.7098	-35.4332	-27.7133	-30.2537	-35.7381
49.1057	-42.5804	-35.2909	-27.6932	-30.1262	-35.7271
49.1384	-42.4513	-35.1475	-27.6725	-29.9975	-35.7139
49.171	-42.3225	-35.0029	-27.6512	-29.8677	-35.6984
49.2037	-42.1941	-34.8574	-27.6294	-29.7369	-35.6808
49.2363	-42.0662	-34.711	-27.607	-29.6054	-35.6609
49.2689	-41.9387	-34.5637	-27.584	-29.4732	-35.6388
49.3016	-41.8117	-34.4156	-27.5603	-29.3406	-35.6144
49.3342	-41.6852	-34.2668	-27.5361	-29.2077	-35.5877
49.3668	-41.5592	-34.1174	-27.5111	-29.0747	-35.5586
49.3995	-41.4338	-33.9673	-27.4855	-28.9418	-35.5273
49.4321	-41.309	-33.8167	-27.4592	-28.8092	-35.4937
49.4648	-41.1847	-33.6657	-27.4322	-28.677	-35.4578
49.4974	-41.061	-33.5143	-27.4045	-28.5454	-35.4195
49.53	-40.9379	-33.3625	-27.3761	-28.4145	-35.379
49.5627	-40.8153	-33.2105	-27.3469	-28.2846	-35.3361
49.5953	-40.6934	-33.0583	-27.3169	-28.1556	-35.291
49.6279	-40.5721	-32.9061	-27.2861	-28.0279	-35.2437
49.6606	-40.4514	-32.7538	-27.2546	-27.9014	-35.1941
49.6932	-40.3313	-32.6016	-27.2223	-27.7763	-35.1423
49.7258	-40.2119	-32.4496	-27.1892	-27.6528	-35.0884
49.7585	-40.0931	-32.2979	-27.1552	-27.5308	-35.0324
49.7911	-39.975	-32.1466	-27.1205	-27.4105	-34.9743
49.8238	-39.8575	-31.9957	-27.0849	-27.292	-34.9141
49.8564	-39.7407	-31.8454	-27.0486	-27.1753	-34.852
49.889	-39.6247	-31.6958	-27.0113	-27.0605	-34.7879
49.9217	-39.5094	-31.547	-26.9733	-26.9477	-34.722
49.9543	-39.3949	-31.399	-26.9344	-26.8368	-34.6543
49.9869	-39.2813	-31.2521	-26.8947	-26.7279	-34.5849
50.0196	-39.1686	-31.1063	-26.8542	-26.621	-34.5137
50.0522	-39.0568	-30.9617	-26.8128	-26.5161	-34.441
50.0849	-38.9459	-30.8184	-26.7705	-26.4133	-34.3667
50.1175	-38.8362	-30.6764	-26.7274	-26.3125	-34.291
50.1501	-38.7275	-30.5359	-26.6835	-26.2138	-34.2139
50.1828	-38.6201	-30.397	-26.6387	-26.1171	-34.1355
50.2154	-38.5139	-30.2596	-26.593	-26.0224	-34.0559
50.248	-38.409	-30.1239	-26.5465	-25.9298	-33.9751
50.2807	-38.3055	-29.99	-26.4991	-25.8391	-33.8932
50.3133	-38.2035	-29.8578	-26.4509	-25.7505	-33.8103
50.346	-38.103	-29.7275	-26.4019	-25.6638	-33.7265
50.3786	-38.0042	-29.599	-26.3521	-25.5792	-33.6417
50.4112	-37.9071	-29.4725	-26.3014	-25.4965	-33.5561
50.4439	-37.8118	-29.348	-26.2499	-25.4158	-33.4698
50.4765	-37.7183	-29.2254	-26.1975	-25.3371	-33.3827
50.5091	-37.6268	-29.105	-26.1444	-25.2604	-33.295
50.5418	-37.5374	-28.9866	-26.0905	-25.1856	-33.2068
50.5744	-37.45	-28.8703	-26.0359	-25.1128	-33.1179
50.607	-37.3649	-28.7563	-25.9805	-25.042	-33.0286
50.6397	-37.282	-28.6445	-25.9243	-24.9732	-32.9388
50.6723	-37.2014	-28.5349	-25.8675	-24.9063	-32.8486
50.705	-37.1232	-28.4276	-25.81	-24.8413	-32.7581
50.7376	-37.0475	-28.3227	-25.7518	-24.7783	-32.6671
50.7702	-36.9742	-28.2201	-25.6931	-24.7172	-32.5758
50.8029	-36.9035	-28.12	-25.6338	-24.658	-32.4842
50.8355	-36.8353	-28.0224	-25.5739	-24.6008	-32.3923
50.8681	-36.7698	-27.9273	-25.5136	-24.5455	-32.3001
50.9008	-36.7069	-27.8348	-25.4529	-24.4921	-32.2076
50.9334	-36.6467	-27.745	-25.3918	-24.4407	-32.1148
50.9661	-36.5891	-27.6578	-25.3304	-24.3912	-32.0217
50.9987	-36.5342	-27.5733	-25.2687	-24.3437	-31.9284
51.0313	-36.482	-27.4915	-25.2068	-24.2981	-31.8348
51.064	-36.4324	-27.4126	-25.1447	-24.2545	-31.741
51.0966	-36.3853	-27.3365	-25.0825	-24.2129	-31.6469
51.1292	-36.3409	-27.2633	-25.0202	-24.1734	-31.5525
51.1619	-36.2989	-27.193	-24.9579	-24.1359	-31.458
51.1945	-36.2594	-27.1256	-24.8956	-24.1005	-31.3632
51.2272	-36.2222	-27.0612	-24.8334	-24.0671	-31.2682
51.2598	-36.1874	-26.9997	-24.7713	-24.036	-31.173
51.2924	-36.1548	-26.9413	-24.7093	-24.007	-31.0776
51.3251	-36.1243	-26.8858	-24.6475	-23.9802	-30.982
51.3577	-36.0958	-26.8334	-24.586	-23.9556	-30.8863
51.3903	-36.0693	-26.784	-24.5247	-23.9333	-30.7904
51.423	-36.0446	-26.7375	-24.4636	-23.9134	-30.6945
51.4556	-36.0217	-26.6941	-24.4029	-23.8958	-30.5985
51.4883	-36.0002	-26.6536	-24.3424	-23.8805	-30.5025
51.5209	-35.9803	-26.616	-24.2823	-23.8677	-30.4065
51.5535	-35.9616	-26.5813	-24.2225	-23.8572	-30.3105
51.5862	-35.9441	-26.5495	-24.1631	-23.8492	-30.2147
51.6188	-35.9276	-26.5206	-24.104	-23.8437	-30.1189
51.6514	-35.9121	-26.4944	-24.0452	-23.8406	-30.0233
51.6841	-35.8973	-26.4711	-23.9868	-23.8399	-29.928
51.7167	-35.8832	-26.4505	-23.9288	-23.8417	-29.8329
51.7493	-35.8696	-26.4326	-23.8711	-23.8459	-29.7382
51.782	-35.8563	-26.4173	-23.8138	-23.8524	-29.6438
51.8146	-35.8433	-26.4047	-23.7567	-23.8614	-29.5499
51.8473	-35.8304	-26.3947	-23.7001	-23.8727	-29.4565
51.8799	-35.8175	-26.3873	-23.6437	-23.8862	-29.3636
51.9125	-35.8045	-26.3824	-23.5876	-23.902	-29.2712
51.9452	-35.7912	-26.38	-23.5319	-23.9199	-29.1796
51.9778	-35.7776	-26.38	-23.4764	-23.9398	-29.0886
52.0104	-35.7636	-26.3825	-23.4212	-23.9618	-28.9984
52.0431	-35.7491	-26.3873	-23.3663	-23.9856	-28.9091
52.0757	-35.7339	-26.3944	-23.3117	-24.0112	-28.8206
52.1084	-35.7181	-26.4038	-23.2572	-24.0385	-28.7331
52.141	-35.7016	-26.4154	-23.203	-24.0674	-28.6466
52.1736	-35.6844	-26.4292	-23.1491	-24.0977	-28.5611
52.2063	-35.6663	-26.445	-23.0953	-24.1294	-28.4768
52.2389	-35.6474	-26.4628	-23.0417	-24.1623	-28.3937
52.2715	-35.6277	-26.4826	-22.9883	-24.1962	-28.3118
52.3042	-35.6071	-26.5043	-22.935	-24.2311	-28.2313
52.3368	-35.5857	-26.5277	-22.8819	-24.2668	-28.1521
52.3695	-35.5634	-26.5528	-22.829	-24.3032	-28.0743
52.4021	-35.5404	-26.5794	-22.7762	-24.3401	-27.998
52.4347	-35.5165	-26.6076	-22.7235	-24.3774	-27.9232
52.4674	-35.4919	-26.6372	-22.671	-24.415	-27.85
52.5	-35.4665	-26.668	-22.6185	-24.4526	-27.7784
52.5326	-35.4405	-26.7	-22.5662	-24.4902	-27.7085
52.5653	-35.4138	-26.7332	-22.5141	-24.5277	-27.6403
52.5979	-35.3864	-26.7672	-22.462	-24.5648	-27.5738
52.6305	-35.3586	-26.8022	-22.4101	-24.6015	-27.5091
52.6632	-35.3302	-26.8379	-22.3584	-24.6376	-27.4462
52.6958	-35.3014	-26.8742	-22.3068	-24.673	-27.3851
52.7285	-35.2722	-26.911	-22.2554	-24.7076	-27.3257
52.7611	-35.2428	-26.9483	-22.2042	-24.7413	-27.2682
52.7937	-35.213	-26.986	-22.1532	-24.774	-27.2124
52.8264	-35.1831	-27.0238	-22.1024	-24.8054	-27.1584
52.859	-35.153	-27.0618	-22.0519	-24.8356	-27.1062
52.8916	-35.1229	-27.0998	-22.0016	-24.8645	-27.0557
52.9243	-35.0928	-27.1378	-21.9517	-24.8919	-27.0069
52.9569	-35.0627	-27.1757	-21.9021	-24.9178	-26.9596
52.9896	-35.0326	-27.2133	-21.8528	-24.942	-26.914
53.0222	-35.0027	-27.2506	-21.8041	-24.9645	-26.8699
53.0548	-34.9729	-27.2875	-21.7557	-24.9853	-26.8273
53.0875	-34.9433	-27.324	-21.7079	-25.0042	-26.7861
53.1201	-34.9138	-27.3599	-21.6606	-25.0213	-26.7462
53.1527	-34.8846	-27.3952	-21.614	-25.0364	-26.7076
53.1854	-34.8556	-27.4297	-21.5679	-25.0495	-26.6702
53.218	-34.8268	-27.4636	-21.5226	-25.0607	-26.6339
53.2507	-34.7982	-27.4965	-21.4779	-25.0698	-26.5987
53.2833	-34.7699	-27.5286	-21.4341	-25.0768	-26.5645
53.3159	-34.7418	-27.5597	-21.391	-25.0818	-26.5313
53.3486	-34.7139	-27.5898	-21.3489	-25.0847	-26.4989
53.3812	-34.6862	-27.6188	-21.3076	-25.0855	-26.4673
53.4138	-34.6586	-27.6466	-21.2672	-25.0843	-26.4365
53.4465	-34.6312	-27.6733	-21.2279	-25.081	-26.4063
53.4791	-34.6039	-27.6986	-21.1895	-25.0757	-26.3768
53.5117	-34.5765	-27.7226	-21.1522	-25.0683	-26.3478
53.5444	-34.5492	-27.7451	-21.1159	-25.059	-26.3194
53.577	-34.5218	-27.7662	-21.0807	-25.0477	-26.2914
53.6097	-34.4943	-27.7858	-21.0466	-25.0345	-26.2638
53.6423	-34.4667	-27.8037	-21.0136	-25.0194	-26.2366
53.6749	-34.4388	-27.8201	-20.9817	-25.0025	-26.2097
53.7076	-34.4106	-27.8347	-20.951	-24.9838	-26.1831
53.7402	-34.3822	-27.8476	-20.9214	-24.9634	-26.1567
53.7728	-34.3533	-27.8587	-20.8929	-24.9414	-26.1306
53.8055	-34.3241	-27.868	-20.8654	-24.9178	-26.1046
53.8381	-34.2943	-27.8755	-20.8391	-24.8927	-26.0788
53.8708	-34.2641	-27.8811	-20.8139	-24.8661	-26.0531
53.9034	-34.2333	-27.8847	-20.7897	-24.838	-26.0276
53.936	-34.2019	-27.8865	-20.7665	-24.8087	-26.0021
53.9687	-34.1699	-27.8863	-20.7443	-24.7779	-25.9767
54.0013	-34.1372	-27.8842	-20.723	-24.746	-25.9515
54.0339	-34.1039	-27.8801	-20.7027	-24.7127	-25.9262
54.0666	-34.0699	-27.8741	-20.6833	-24.6783	-25.9011
54.0992	-34.0353	-27.8662	-20.6647	-24.6427	-25.876
54.1319	-33.9999	-27.8563	-20.647	-24.606	-25.8509
54.1645	-33.964	-27.8445	-20.6301	-24.5682	-25.8259
54.1971	-33.9274	-27.8309	-20.6139	-24.5293	-25.8009
54.2298	-33.8903	-27.8154	-20.5984	-24.4894	-25.776
54.2624	-33.8525	-27.7981	-20.5835	-24.4485	-25.7512
54.295	-33.8143	-27.7791	-20.5693	-24.4065	-25.7264
54.3277	-33.7756	-27.7583	-20.5557	-24.3637	-25.7017
54.3603	-33.7365	-27.7358	-20.5426	-24.3198	-25.6771
54.393	-33.697	-27.7117	-20.5301	-24.2751	-25.6525
54.4256	-33.6572	-27.686	-20.518	-24.2295	-25.6281
54.4582	-33.6171	-27.6588	-20.5064	-24.1831	-25.6039
54.4909	-33.5768	-27.6302	-20.4952	-24.1359	-25.5798
54.5235	-33.5363	-27.6002	-20.4844	-24.0879	-25.5558
54.5561	-33.4957	-27.5688	-20.4739	-24.0394	-25.532
54.5888	-33.4551	-27.5363	-20.4638	-23.9902	-25.5084
54.6214	-33.4145	-27.5025	-20.454	-23.9404	-25.4851
54.654	-33.3741	-27.4676	-20.4444	-23.8903	-25.462
54.6867	-33.3338	-27.4317	-20.435	-23.8397	-25.4391
54.7193	-33.2938	-27.3947	-20.4259	-23.7889	-25.4165
54.752	-33.2542	-27.3569	-20.4169	-23.7379	-25.3942
54.7846	-33.215	-27.3181	-20.408	-23.6867	-25.3722
54.8172	-33.1764	-27.2786	-20.3992	-23.6356	-25.3505
54.8499	-33.1384	-27.2384	-20.3905	-23.5846	-25.3291
54.8825	-33.1011	-27.1974	-20.3818	-23.5337	-25.3081
54.9151	-33.0645	-27.1559	-20.3732	-23.483	-25.2874
54.9478	-33.0289	-27.1139	-20.3646	-23.4328	-25.2671
54.9804	-32.9941	-27.0715	-20.356	-23.3829	-25.2471
55.0131	-32.9604	-27.0287	-20.3474	-23.3336	-25.2274
55.0457	-32.9278	-26.9855	-20.3388	-23.2849	-25.2081
55.0783	-32.8963	-26.9422	-20.3302	-23.2369	-25.1891
55.111	-32.866	-26.8987	-20.3215	-23.1896	-25.1705
55.1436	-32.837	-26.855	-20.3129	-23.1432	-25.1521
55.1762	-32.8092	-26.8114	-20.3043	-23.0978	-25.1341
55.2089	-32.7828	-26.7678	-20.2958	-23.0533	-25.1163
55.2415	-32.7577	-26.7244	-20.2872	-23.0098	-25.0989
55.2742	-32.7339	-26.6811	-20.2787	-22.9676	-25.0817
55.3068	-32.7116	-26.6381	-20.2703	-22.9265	-25.0648
55.3394	-32.6905	-26.5954	-20.2619	-22.8867	-25.0482
55.3721	-32.6709	-26.5531	-20.2536	-22.8482	-25.0318
55.4047	-32.6525	-26.5113	-20.2454	-22.8111	-25.0157
55.4373	-32.6355	-26.4699	-20.2374	-22.7755	-24.9999
55.47	-32.6197	-26.4291	-20.2295	-22.7414	-24.9843
55.5026	-32.6051	-26.3889	-20.2217	-22.7088	-24.9689
55.5352	-32.5917	-26.3493	-20.2141	-22.6778	-24.9537
55.5679	-32.5794	-26.3104	-20.2067	-22.6484	-24.9388
55.6005	-32.5682	-26.2722	-20.1995	-22.6207	-24.9241
55.6332	-32.5579	-26.2347	-20.1925	-22.5948	-24.9095
55.6658	-32.5485	-26.1981	-20.1857	-22.5706	-24.8952
55.6984	-32.54	-26.1622	-20.1792	-22.5482	-24.8811
55.7311	-32.5322	-26.1272	-20.1729	-22.5278	-24.8672
55.7637	-32.525	-26.093	-20.1668	-22.5092	-24.8535
55.7963	-32.5185	-26.0597	-20.1609	-22.4925	-24.84
55.829	-32.5124	-26.0272	-20.1552	-22.4778	-24.8267
55.8616	-32.5068	-25.9956	-20.1496	-22.4651	-24.8136
55.8943	-32.5015	-25.9649	-20.1443	-22.4544	-24.8007
55.9269	-32.4965	-25.9351	-20.1391	-22.4456	-24.788
55.9595	-32.4917	-25.9062	-20.1341	-22.4389	-24.7755
55.9922	-32.487	-25.8781	-20.1291	-22.4342	-24.7633
56.0248	-32.4824	-25.8508	-20.1242	-22.4316	-24.7512
56.0574	-32.4779	-25.8244	-20.1194	-22.4309	-24.7394
56.0901	-32.4733	-25.7989	-20.1147	-22.4321	-24.7278
56.1227	-32.4687	-25.7741	-20.1099	-22.4354	-24.7164
56.1554	-32.4641	-25.7502	-20.1051	-22.4405	-24.7052
56.188	-32.4593	-25.7271	-20.1002	-22.4476	-24.6942
56.2206	-32.4544	-25.7047	-20.0952	-22.4564	-24.6834
56.2533	-32.4494	-25.6832	-20.0902	-22.467	-24.6729
56.2859	-32.4443	-25.6624	-20.085	-22.4794	-24.6626
56.3185	-32.439	-25.6423	-20.0796	-22.4934	-24.6524
56.3512	-32.4336	-25.623	-20.074	-22.509	-24.6425
56.3838	-32.4281	-25.6044	-20.0683	-22.5261	-24.6328
56.4164	-32.4224	-25.5866	-20.0623	-22.5446	-24.6232
56.4491	-32.4166	-25.5696	-20.0562	-22.5646	-24.6138
56.4817	-32.4106	-25.5532	-20.0498	-22.5859	-24.6047
56.5144	-32.4046	-25.5377	-20.0431	-22.6084	-24.5956
56.547	-32.3985	-25.5229	-20.0362	-22.6322	-24.5868
56.5796	-32.3923	-25.5088	-20.0291	-22.657	-24.5781
56.6123	-32.3861	-25.4955	-20.0217	-22.683	-24.5696
56.6449	-32.3799	-25.4829	-20.0141	-22.7099	-24.5612
56.6775	-32.3737	-25.4711	-20.0062	-22.7379	-24.553
56.7102	-32.3675	-25.4601	-19.9982	-22.7667	-24.545
56.7428	-32.3614	-25.4498	-19.9899	-22.7964	-24.5371
56.7755	-32.3553	-25.4402	-19.9813	-22.827	-24.5294
56.8081	-32.3494	-25.4313	-19.9726	-22.8583	-24.5218
56.8407	-32.3437	-25.4232	-19.9637	-22.8904	-24.5145
56.8734	-32.3383	-25.4158	-19.9547	-22.9232	-24.5073
56.906	-32.333	-25.4091	-19.9455	-22.9566	-24.5003
56.9386	-32.3281	-25.403	-19.9362	-22.9907	-24.4935
56.9713	-32.3236	-25.3977	-19.9268	-23.0253	-24.4869
57.0039	-32.3195	-25.393	-19.9173	-23.0605	-24.4805
57.0366	-32.3158	-25.3888	-19.9078	-23.0961	-24.4744
57.0692	-32.3126	-25.3853	-19.8983	-23.1322	-24.4684
57.1018	-32.31	-25.3824	-19.8888	-23.1687	-24.4627
57.1345	-32.308	-25.38	-19.8794	-23.2055	-24.4572
57.1671	-32.3067	-25.3782	-19.87	-23.2426	-24.4519
57.1997	-32.306	-25.3768	-19.8609	-23.2799	-24.4469
57.2324	-32.306	-25.3759	-19.8518	-23.3175	-24.4421
57.265	-32.3068	-25.3754	-19.843	-23.3551	-24.4375
57.2977	-32.3084	-25.3754	-19.8344	-23.3929	-24.4333
57.3303	-32.3107	-25.3757	-19.8261	-23.4307	-24.4293
57.3629	-32.3138	-25.3764	-19.8181	-23.4684	-24.4255
57.3956	-32.3178	-25.3774	-19.8104	-23.5061	-24.4221
57.4282	-32.3225	-25.3787	-19.8031	-23.5436	-24.419
57.4608	-32.328	-25.3803	-19.7962	-23.581	-24.4162
57.4935	-32.3344	-25.382	-19.7897	-23.618	-24.4137
57.5261	-32.3415	-25.3839	-19.7836	-23.6548	-24.4115
57.5587	-32.3493	-25.3859	-19.778	-23.6913	-24.4097
57.5914	-32.3579	-25.388	-19.7729	-23.7273	-24.4082
57.624	-32.3672	-25.3901	-19.7683	-23.7629	-24.407
57.6567	-32.3772	-25.3923	-19.7642	-23.798	-24.4063
57.6893	-32.3878	-25.3944	-19.7606	-23.8325	-24.4059
57.7219	-32.399	-25.3964	-19.7576	-23.8664	-24.4059
57.7546	-32.4107	-25.3982	-19.755	-23.8997	-24.4063
57.7872	-32.423	-25.3999	-19.753	-23.9323	-24.4072
57.8198	-32.4357	-25.4014	-19.7515	-23.9642	-24.4084
57.8525	-32.4488	-25.4026	-19.7505	-23.9953	-24.4101
57.8851	-32.4624	-25.4035	-19.75	-24.0257	-24.4122
57.9178	-32.4763	-25.404	-19.75	-24.0551	-24.4148
57.9504	-32.4904	-25.4041	-19.7504	-24.0838	-24.4177
57.983	-32.5049	-25.4038	-19.7513	-24.1115	-24.4211
58.0157	-32.5195	-25.403	-19.7526	-24.1383	-24.425
58.0483	-32.5344	-25.4016	-19.7542	-24.1641	-24.4292
58.0809	-32.5494	-25.3996	-19.7563	-24.189	-24.4339
58.1136	-32.5645	-25.3971	-19.7586	-24.2129	-24.439
58.1462	-32.5798	-25.3938	-19.7612	-24.2357	-24.4444
58.1789	-32.5951	-25.3899	-19.764	-24.2576	-24.4502
58.2115	-32.6105	-25.3853	-19.7671	-24.2784	-24.4564
58.2441	-32.6259	-25.3798	-19.7703	-24.2981	-24.4629
58.2768	-32.6413	-25.3737	-19.7737	-24.3168	-24.4697
58.3094	-32.6566	-25.3667	-19.7771	-24.3344	-24.4767
58.342	-32.672	-25.3589	-19.7807	-24.351	-24.484
58.3747	-32.6873	-25.3503	-19.7842	-24.3664	-24.4914
58.4073	-32.7026	-25.3408	-19.7878	-24.3807	-24.4991
58.4399	-32.7178	-25.3305	-19.7913	-24.3939	-24.5068
58.4726	-32.7329	-25.3194	-19.7948	-24.406	-24.5147
58.5052	-32.7478	-25.3074	-19.7983	-24.417	-24.5226
58.5379	-32.7627	-25.2947	-19.8016	-24.4269	-24.5305
58.5705	-32.7774	-25.2811	-19.8049	-24.4357	-24.5384
58.6031	-32.792	-25.2667	-19.808	-24.4433	-24.5463
58.6358	-32.8064	-25.2516	-19.8111	-24.4499	-24.5542
58.6684	-32.8206	-25.2358	-19.814	-24.4553	-24.562
58.701	-32.8346	-25.2194	-19.8168	-24.4597	-24.5696
58.7337	-32.8483	-25.2023	-19.8194	-24.463	-24.5772
58.7663	-32.8617	-25.1846	-19.8219	-24.4652	-24.5846
58.799	-32.8748	-25.1664	-19.8243	-24.4663	-24.5919
58.8316	-32.8877	-25.1477	-19.8265	-24.4663	-24.5991
58.8642	-32.9001	-25.1286	-19.8286	-24.4653	-24.6061
58.8969	-32.9122	-25.1092	-19.8306	-24.4632	-24.6129
58.9295	-32.9239	-25.0896	-19.8324	-24.4601	-24.6196
58.9621	-32.9351	-25.0697	-19.8342	-24.456	-24.6261
58.9948	-32.946	-25.0498	-19.8358	-24.4509	-24.6324
59.0274	-32.9564	-25.0298	-19.8374	-24.4449	-24.6386
59.0601	-32.9663	-25.0098	-19.8389	-24.4379	-24.6445
59.0927	-32.9757	-24.99	-19.8403	-24.43	-24.6504
59.1253	-32.9846	-24.9705	-19.8417	-24.4213	-24.656
59.158	-32.9931	-24.9512	-19.843	-24.4117	-24.6615
59.1906	-33.001	-24.9323	-19.8443	-24.4013	-24.6669
59.2232	-33.0083	-24.9138	-19.8456	-24.3901	-24.6721
59.2559	-33.0151	-24.8959	-19.8469	-24.3782	-24.6772
59.2885	-33.0214	-24.8786	-19.8482	-24.3656	-24.6822
59.3211	-33.0271	-24.862	-19.8496	-24.3523	-24.6871
59.3538	-33.0322	-24.8461	-19.851	-24.3384	-24.6919
59.3864	-33.0367	-24.831	-19.8525	-24.3239	-24.6966
59.4191	-33.0406	-24.8167	-19.8541	-24.3088	-24.7013
59.4517	-33.0439	-24.8033	-19.8557	-24.2932	-24.706
59.4843	-33.0467	-24.7909	-19.8574	-24.277	-24.7107
59.517	-33.0488	-24.7794	-19.8593	-24.2604	-24.7153
59.5496	-33.0503	-24.7689	-19.8613	-24.2433	-24.72
59.5822	-33.0513	-24.7594	-19.8634	-24.2257	-24.7248
59.6149	-33.0516	-24.7509	-19.8656	-24.2078	-24.7296
59.6475	-33.0514	-24.7435	-19.868	-24.1894	-24.7345
59.6802	-33.0505	-24.7371	-19.8705	-24.1707	-24.7395
59.7128	-33.049	-24.7318	-19.8732	-24.1517	-24.7445
59.7454	-33.047	-24.7275	-19.8761	-24.1323	-24.7498
59.7781	-33.0443	-24.7243	-19.8792	-24.1126	-24.7551
59.8107	-33.041	-24.7221	-19.8824	-24.0926	-24.7606
59.8433	-33.0371	-24.7209	-19.8858	-24.0724	-24.7663
59.876	-33.0327	-24.7208	-19.8894	-24.052	-24.7721
59.9086	-33.0276	-24.7216	-19.8932	-24.0313	-24.7781
59.9413	-33.022	-24.7235	-19.8971	-24.0105	-24.7842
59.9739	-33.0157	-24.7263	-19.9011	-23.9895	-24.7906
60.0065	-33.0089	-24.73	-19.9053	-23.9684	-24.7971
60.0392	-33.0015	-24.7347	-19.9097	-23.9472	-24.8038
60.0718	-32.9936	-24.7402	-19.9141	-23.9259	-24.8107
60.1044	-32.9851	-24.7466	-19.9186	-23.9046	-24.8178
60.1371	-32.9762	-24.7539	-19.9231	-23.8833	-24.825
60.1697	-32.9667	-24.7619	-19.9277	-23.8621	-24.8324
60.2023	-32.9568	-24.7708	-19.9323	-23.8409	-24.84
60.235	-32.9465	-24.7805	-19.9369	-23.8199	-24.8476
60.2676	-32.9358	-24.7908	-19.9415	-23.799	-24.8554
60.3003	-32.9247	-24.802	-19.946	-23.7783	-24.8633
60.3329	-32.9134	-24.8138	-19.9504	-23.7579	-24.8712
60.3655	-32.9017	-24.8263	-19.9547	-23.7377	-24.8792
60.3982	-32.8898	-24.8394	-19.9589	-23.7179	-24.8873
60.4308	-32.8777	-24.8532	-19.9629	-23.6985	-24.8953
60.4634	-32.8655	-24.8675	-19.9668	-23.6794	-24.9033
60.4961	-32.8532	-24.8824	-19.9705	-23.6608	-24.9112
60.5287	-32.8409	-24.8979	-19.974	-23.6426	-24.919
60.5614	-32.8285	-24.9138	-19.9773	-23.625	-24.9267
60.594	-32.8161	-24.9303	-19.9804	-23.6079	-24.9343
60.6266	-32.8039	-24.9472	-19.9833	-23.5914	-24.9416
60.6593	-32.7917	-24.9644	-19.9859	-23.5754	-24.9487
60.6919	-32.7797	-24.9821	-19.9883	-23.5601	-24.9556
60.7245	-32.7679	-25.0001	-19.9905	-23.5454	-24.9622
60.7572	-32.7563	-25.0185	-19.9924	-23.5313	-24.9685
60.7898	-32.7449	-25.0371	-19.9941	-23.5178	-24.9745
60.8225	-32.7337	-25.0561	-19.9956	-23.5051	-24.9801
60.8551	-32.7229	-25.0753	-19.9968	-23.493	-24.9854
60.8877	-32.7123	-25.0948	-19.9978	-23.4816	-24.9903
60.9204	-32.7021	-25.1145	-19.9986	-23.4709	-24.9948
60.953	-32.6921	-25.1344	-19.9992	-23.4609	-24.9988
60.9856	-32.6825	-25.1546	-19.9996	-23.4516	-25.0025
61.0183	-32.6732	-25.1751	-19.9998	-23.4431	-25.0057
61.0509	-32.6642	-25.1958	-19.9999	-23.4352	-25.0085
61.0836	-32.6554	-25.2168	-19.9998	-23.4281	-25.0108
61.1162	-32.6469	-25.238	-19.9995	-23.4217	-25.0128
61.1488	-32.6387	-25.2596	-19.9991	-23.416	-25.0142
61.1815	-32.6307	-25.2815	-19.9986	-23.411	-25.0153
61.2141	-32.6229	-25.3037	-19.9979	-23.4068	-25.0159
61.2467	-32.6152	-25.3263	-19.9972	-23.4032	-25.0162
61.2794	-32.6077	-25.3493	-19.9963	-23.4003	-25.016
61.312	-32.6002	-25.3726	-19.9954	-23.3981	-25.0155
61.3446	-32.5928	-25.3962	-19.9944	-23.3965	-25.0146
61.3773	-32.5854	-25.4202	-19.9933	-23.3955	-25.0134
61.4099	-32.578	-25.4446	-19.9922	-23.3951	-25.0119
61.4426	-32.5706	-25.4694	-19.991	-23.3953	-25.01
61.4752	-32.5631	-25.4945	-19.9898	-23.3959	-25.0079
61.5078	-32.5555	-25.5199	-19.9886	-23.397	-25.0055
61.5405	-32.5478	-25.5456	-19.9873	-23.3985	-25.0029
61.5731	-32.54	-25.5715	-19.9861	-23.4004	-25
61.6057	-32.5321	-25.5977	-19.9847	-23.4026	-24.997
61.6384	-32.524	-25.6241	-19.9834	-23.405	-24.9938
61.671	-32.5157	-25.6507	-19.9821	-23.4076	-24.9904
61.7037	-32.5074	-25.6773	-19.9807	-23.4104	-24.987
61.7363	-32.4989	-25.7041	-19.9794	-23.4132	-24.9834
61.7689	-32.4902	-25.7309	-19.978	-23.416	-24.9798
61.8016	-32.4815	-25.7576	-19.9767	-23.4187	-24.9761
61.8342	-32.4726	-25.7843	-19.9754	-23.4213	-24.9725
61.8668	-32.4636	-25.8109	-19.9741	-23.4236	-24.9689
61.8995	-32.4545	-25.8373	-19.9729	-23.4257	-24.9653
61.9321	-32.4454	-25.8634	-19.9716	-23.4275	-24.9619
61.9648	-32.4361	-25.8894	-19.9704	-23.4288	-24.9586
61.9974	-32.4269	-25.9149	-19.9692	-23.4297	-24.9554
62.03	-32.4175	-25.9402	-19.9681	-23.43	-24.9524
62.0627	-32.4082	-25.965	-19.9669	-23.4297	-24.9496
62.0953	-32.3988	-25.9893	-19.9658	-23.4288	-24.9471
62.1279	-32.3894	-26.0131	-19.9648	-23.4272	-24.9447
62.1606	-32.3801	-26.0364	-19.9637	-23.4249	-24.9426
62.1932	-32.3708	-26.059	-19.9627	-23.4218	-24.9408
62.2258	-32.3615	-26.0811	-19.9617	-23.418	-24.9392
62.2585	-32.3524	-26.1024	-19.9608	-23.4133	-24.9379
62.2911	-32.3434	-26.123	-19.9599	-23.4079	-24.9368
62.3238	-32.3345	-26.1428	-19.959	-23.4017	-24.936
62.3564	-32.3259	-26.1618	-19.9581	-23.3947	-24.9354
62.389	-32.3174	-26.18	-19.9572	-23.3869	-24.9351
62.4217	-32.3093	-26.1973	-19.9563	-23.3783	-24.9349
62.4543	-32.3015	-26.2137	-19.9555	-23.369	-24.9348
62.4869	-32.2941	-26.2291	-19.9546	-23.3589	-24.9349
62.5196	-32.2871	-26.2435	-19.9537	-23.3482	-24.9351
62.5522	-32.2805	-26.2569	-19.9528	-23.3367	-24.9354
62.5849	-32.2745	-26.2692	-19.952	-23.3247	-24.9357
62.6175	-32.269	-26.2805	-19.9511	-23.3121	-24.936
62.6501	-32.2641	-26.2907	-19.9503	-23.2989	-24.9362
62.6828	-32.2598	-26.2997	-19.9494	-23.2852	-24.9364
62.7154	-32.2562	-26.3075	-19.9486	-23.271	-24.9364
62.748	-32.2533	-26.3142	-19.9477	-23.2564	-24.9363
62.7807	-32.2511	-26.3197	-19.9469	-23.2415	-24.936
62.8133	-32.2496	-26.3239	-19.9461	-23.2262	-24.9355
62.846	-32.249	-26.3269	-19.9453	-23.2107	-24.9347
62.8786	-32.2491	-26.3287	-19.9446	-23.1949	-24.9337
62.9112	-32.2499	-26.3292	-19.9438	-23.179	-24.9323
62.9439	-32.2516	-26.3285	-19.9431	-23.163	-24.9305
62.9765	-32.254	-26.3266	-19.9425	-23.1469	-24.9284
63.0091	-32.2572	-26.3235	-19.9419	-23.1309	-24.9259
63.0418	-32.2612	-26.3192	-19.9413	-23.1149	-24.9229
63.0744	-32.2658	-26.3138	-19.9407	-23.099	-24.9195
63.107	-32.2712	-26.3072	-19.9402	-23.0833	-24.9156
63.1397	-32.2772	-26.2996	-19.9398	-23.0678	-24.9112
63.1723	-32.2838	-26.2909	-19.9394	-23.0527	-24.9064
63.205	-32.291	-26.2813	-19.939	-23.0378	-24.901
63.2376	-32.2987	-26.2707	-19.9387	-23.0234	-24.8951
63.2702	-32.3068	-26.2592	-19.9385	-23.0094	-24.8887
63.3029	-32.3154	-26.2469	-19.9382	-22.9959	-24.8818
63.3355	-32.3242	-26.2338	-19.9381	-22.983	-24.8743
63.3681	-32.3334	-26.22	-19.9379	-22.9706	-24.8663
63.4008	-32.3428	-26.2056	-19.9378	-22.9589	-24.8577
63.4334	-32.3523	-26.1906	-19.9377	-22.9479	-24.8486
63.4661	-32.3619	-26.1751	-19.9376	-22.9376	-24.839
63.4987	-32.3715	-26.1591	-19.9376	-22.928	-24.8289
63.5313	-32.3811	-26.1428	-19.9375	-22.9192	-24.8182
63.564	-32.3906	-26.1262	-19.9374	-22.9112	-24.807
63.5966	-32.3999	-26.1093	-19.9373	-22.904	-24.7953
63.6292	-32.4089	-26.0922	-19.9371	-22.8977	-24.7831
63.6619	-32.4178	-26.075	-19.9368	-22.8922	-24.7704
63.6945	-32.4263	-26.0577	-19.9365	-22.8876	-24.7572
63.7272	-32.4345	-26.0404	-19.9362	-22.8839	-24.7435
63.7598	-32.4423	-26.023	-19.9357	-22.8811	-24.7294
63.7924	-32.4497	-26.0058	-19.9352	-22.8792	-24.7148
63.8251	-32.4567	-25.9886	-19.9346	-22.8783	-24.6998
63.8577	-32.4632	-25.9716	-19.9338	-22.8783	-24.6845
63.8903	-32.4693	-25.9548	-19.933	-22.8792	-24.6688
63.923	-32.475	-25.9381	-19.9321	-22.881	-24.6528
63.9556	-32.4801	-25.9216	-19.931	-22.8837	-24.6366
63.9883	-32.4848	-25.9054	-19.9299	-22.8873	-24.6201
64.0209	-32.489	-25.8894	-19.9287	-22.8919	-24.6034
64.0535	-32.4926	-25.8737	-19.9273	-22.8973	-24.5866
64.0862	-32.4958	-25.8582	-19.9258	-22.9035	-24.5697
64.1188	-32.4985	-25.843	-19.9243	-22.9107	-24.5528
64.1514	-32.5007	-25.8281	-19.9226	-22.9186	-24.5358
64.1841	-32.5024	-25.8135	-19.9209	-22.9274	-24.5189
64.2167	-32.5037	-25.7991	-19.9191	-22.937	-24.502
64.2493	-32.5045	-25.785	-19.9173	-22.9474	-24.4853
64.282	-32.5049	-25.7711	-19.9154	-22.9585	-24.4686
64.3146	-32.5049	-25.7575	-19.9134	-22.9704	-24.4521
64.3473	-32.5046	-25.7442	-19.9114	-22.983	-24.4358
64.3799	-32.5039	-25.731	-19.9095	-22.9964	-24.4197
64.4125	-32.5028	-25.7182	-19.9075	-23.0104	-24.4037
64.4452	-32.5015	-25.7055	-19.9055	-23.0251	-24.388
64.4778	-32.4999	-25.693	-19.9035	-23.0405	-24.3726
64.5104	-32.4981	-25.6808	-19.9016	-23.0564	-24.3574
64.5431	-32.4961	-25.6687	-19.8998	-23.073	-24.3424
64.5757	-32.494	-25.6568	-19.898	-23.0901	-24.3277
64.6084	-32.4917	-25.6451	-19.8964	-23.1078	-24.3133
64.641	-32.4893	-25.6336	-19.8948	-23.126	-24.2991
64.6736	-32.4869	-25.6221	-19.8934	-23.1446	-24.2853
64.7063	-32.4845	-25.6108	-19.8921	-23.1636	-24.2717
64.7389	-32.4821	-25.5996	-19.891	-23.183	-24.2585
64.7715	-32.4798	-25.5885	-19.89	-23.2028	-24.2456
64.8042	-32.4776	-25.5775	-19.8892	-23.2228	-24.2329
64.8368	-32.4755	-25.5666	-19.8886	-23.2431	-24.2207
64.8695	-32.4737	-25.5557	-19.8882	-23.2636	-24.2087
64.9021	-32.472	-25.5448	-19.888	-23.2843	-24.1971
64.9347	-32.4706	-25.5339	-19.8881	-23.305	-24.1858
64.9674	-32.4695	-25.5231	-19.8883	-23.3257	-24.1749
65	-32.4686	-25.5122	-19.8887	-23.3464	-24.1642
65.0326	-32.4681	-25.5013	-19.8894	-23.3671	-24.154
65.0653	-32.4679	-25.4904	-19.8902	-23.3876	-24.144
65.0979	-32.468	-25.4794	-19.8913	-23.408	-24.1344
65.1305	-32.4685	-25.4683	-19.8926	-23.4282	-24.125
65.1632	-32.4693	-25.4572	-19.8941	-23.4481	-24.116
65.1958	-32.4705	-25.4459	-19.8959	-23.4677	-24.1072
65.2285	-32.472	-25.4346	-19.8978	-23.4869	-24.0987
65.2611	-32.4738	-25.4231	-19.8999	-23.5057	-24.0904
65.2937	-32.476	-25.4115	-19.9022	-23.524	-24.0823
65.3264	-32.4784	-25.3997	-19.9047	-23.5418	-24.0744
65.359	-32.4811	-25.3878	-19.9072	-23.5591	-24.0666
65.3916	-32.484	-25.3757	-19.91	-23.5758	-24.059
65.4243	-32.4871	-25.3635	-19.9128	-23.5918	-24.0515
65.4569	-32.4904	-25.3511	-19.9157	-23.6072	-24.0441
65.4896	-32.4938	-25.3386	-19.9186	-23.6218	-24.0367
65.5222	-32.4973	-25.3259	-19.9216	-23.6357	-24.0293
65.5548	-32.5008	-25.3132	-19.9246	-23.6489	-24.0219
65.5875	-32.5043	-25.3003	-19.9276	-23.6612	-24.0145
65.6201	-32.5078	-25.2874	-19.9306	-23.6727	-24.007
65.6527	-32.5111	-25.2744	-19.9335	-23.6834	-23.9995
65.6854	-32.5142	-25.2613	-19.9363	-23.6933	-23.9918
65.718	-32.5171	-25.2483	-19.9391	-23.7022	-23.9841
65.7507	-32.5196	-25.2352	-19.9418	-23.7104	-23.9762
65.7833	-32.5219	-25.2221	-19.9444	-23.7176	-23.9681
65.8159	-32.5237	-25.2091	-19.9468	-23.724	-23.9599
65.8486	-32.5251	-25.1961	-19.9491	-23.7295	-23.9514
65.8812	-32.526	-25.1831	-19.9512	-23.7341	-23.9428
65.9138	-32.5263	-25.1702	-19.9532	-23.7379	-23.9339
65.9465	-32.526	-25.1575	-19.955	-23.7408	-23.9249
65.9791	-32.5251	-25.1448	-19.9567	-23.743	-23.9157
66.0117	-32.5236	-25.1322	-19.9581	-23.7443	-23.9062
66.0444	-32.5213	-25.1197	-19.9593	-23.7448	-23.8966
66.077	-32.5184	-25.1073	-19.9604	-23.7446	-23.8868
66.1097	-32.5147	-25.095	-19.9612	-23.7437	-23.8768
66.1423	-32.5103	-25.0828	-19.9618	-23.7421	-23.8667
66.1749	-32.5051	-25.0707	-19.9621	-23.7399	-23.8564
66.2076	-32.4992	-25.0586	-19.9623	-23.737	-23.8461
66.2402	-32.4926	-25.0467	-19.9622	-23.7336	-23.8356
66.2728	-32.4852	-25.0348	-19.962	-23.7297	-23.8251
66.3055	-32.4771	-25.0231	-19.9615	-23.7253	-23.8145
66.3381	-32.4683	-25.0113	-19.9609	-23.7204	-23.8039
66.3708	-32.4588	-24.9997	-19.96	-23.7152	-23.7932
66.4034	-32.4485	-24.988	-19.959	-23.7096	-23.7826
66.436	-32.4376	-24.9765	-19.9579	-23.7037	-23.7719
66.4687	-32.426	-24.965	-19.9566	-23.6976	-23.7613
66.5013	-32.4138	-24.9535	-19.9551	-23.6913	-23.7508
66.5339	-32.4009	-24.942	-19.9536	-23.6848	-23.7403
66.5666	-32.3874	-24.9306	-19.952	-23.6781	-23.73
66.5992	-32.3733	-24.9192	-19.9503	-23.6714	-23.7197
66.6319	-32.3587	-24.9078	-19.9486	-23.6646	-23.7096
66.6645	-32.3436	-24.8964	-19.9468	-23.6578	-23.6997
66.6971	-32.328	-24.885	-19.9451	-23.6509	-23.6899
66.7298	-32.3119	-24.8736	-19.9434	-23.6441	-23.6804
66.7624	-32.2953	-24.8622	-19.9417	-23.6373	-23.671
66.795	-32.2784	-24.8509	-19.9401	-23.6306	-23.6619
66.8277	-32.2611	-24.8395	-19.9385	-23.6239	-23.653
66.8603	-32.2434	-24.8281	-19.9371	-23.6174	-23.6444
66.893	-32.2255	-24.8168	-19.9357	-23.6109	-23.6361
66.9256	-32.2073	-24.8054	-19.9345	-23.6045	-23.628
66.9582	-32.1888	-24.7941	-19.9334	-23.5983	-23.6203
66.9909	-32.1703	-24.7828	-19.9324	-23.5922	-23.6129
67.0235	-32.1515	-24.7716	-19.9316	-23.5863	-23.6058
67.0561	-32.1327	-24.7604	-19.9309	-23.5805	-23.5991
67.0888	-32.1139	-24.7492	-19.9303	-23.5748	-23.5928
67.1214	-32.0951	-24.738	-19.93	-23.5693	-23.5868
67.154	-32.0762	-24.7269	-19.9298	-23.5638	-23.5813
67.1867	-32.0575	-24.7159	-19.9298	-23.5585	-23.5761
67.2193	-32.0389	-24.7048	-19.9299	-23.5532	-23.5714
67.252	-32.0204	-24.6939	-19.9303	-23.548	-23.5671
67.2846	-32.002	-24.6829	-19.9308	-23.5428	-23.5633
67.3172	-31.9839	-24.6721	-19.9314	-23.5375	-23.5598
67.3499	-31.966	-24.6612	-19.9322	-23.5322	-23.5569
67.3825	-31.9483	-24.6505	-19.9332	-23.5267	-23.5543
67.4151	-31.9309	-24.6398	-19.9342	-23.5212	-23.5522
67.4478	-31.9137	-24.6291	-19.9354	-23.5154	-23.5506
67.4804	-31.8968	-24.6185	-19.9367	-23.5094	-23.5494
67.5131	-31.8803	-24.608	-19.938	-23.5032	-23.5486
67.5457	-31.864	-24.5975	-19.9395	-23.4967	-23.5482
67.5783	-31.848	-24.5871	-19.9409	-23.4899	-23.5483
67.611	-31.8323	-24.5768	-19.9424	-23.4828	-23.5488
67.6436	-31.8169	-24.5665	-19.9439	-23.4754	-23.5496
67.6762	-31.8018	-24.5562	-19.9453	-23.4676	-23.5508
67.7089	-31.7869	-24.546	-19.9468	-23.4594	-23.5524
67.7415	-31.7723	-24.5359	-19.9481	-23.4509	-23.5542
67.7742	-31.7578	-24.5257	-19.9494	-23.4421	-23.5564
67.8068	-31.7436	-24.5156	-19.9506	-23.4328	-23.5588
67.8394	-31.7294	-24.5056	-19.9517	-23.4232	-23.5614
67.8721	-31.7154	-24.4955	-19.9527	-23.4133	-23.5642
67.9047	-31.7014	-24.4855	-19.9535	-23.403	-23.5671
67.9373	-31.6875	-24.4754	-19.9542	-23.3924	-23.5702
67.97	-31.6737	-24.4654	-19.9547	-23.3816	-23.5734
68.0026	-31.6598	-24.4553	-19.955	-23.3704	-23.5766
68.0352	-31.646	-24.4452	-19.9551	-23.3591	-23.5798
68.0679	-31.6321	-24.4351	-19.9549	-23.3476	-23.5831
68.1005	-31.6182	-24.4249	-19.9546	-23.3359	-23.5863
68.1332	-31.6043	-24.4146	-19.954	-23.3242	-23.5894
68.1658	-31.5902	-24.4042	-19.9532	-23.3124	-23.5925
68.1984	-31.5761	-24.3937	-19.9522	-23.3007	-23.5954
68.2311	-31.5619	-24.3831	-19.9509	-23.289	-23.5982
68.2637	-31.5475	-24.3722	-19.9494	-23.2776	-23.6009
68.2963	-31.533	-24.3612	-19.9475	-23.2663	-23.6033
68.329	-31.5184	-24.3499	-19.9455	-23.2553	-23.6055
68.3616	-31.5036	-24.3383	-19.9431	-23.2447	-23.6075
68.3943	-31.4887	-24.3265	-19.9405	-23.2345	-23.6093
68.4269	-31.4736	-24.3142	-19.9377	-23.2248	-23.6107
68.4595	-31.4584	-24.3016	-19.9345	-23.2157	-23.6119
68.4922	-31.4429	-24.2886	-19.9312	-23.2072	-23.6129
68.5248	-31.4274	-24.275	-19.9275	-23.1995	-23.6135
68.5574	-31.4116	-24.261	-19.9237	-23.1926	-23.6137
68.5901	-31.3957	-24.2464	-19.9196	-23.1866	-23.6137
68.6227	-31.3796	-24.2313	-19.9153	-23.1814	-23.6134
68.6554	-31.3634	-24.2155	-19.9108	-23.1773	-23.6127
68.688	-31.3471	-24.199	-19.9061	-23.1742	-23.6116
68.7206	-31.3305	-24.1819	-19.9013	-23.1722	-23.6102
68.7533	-31.3138	-24.1641	-19.8963	-23.1713	-23.6085
68.7859	-31.297	-24.1455	-19.8911	-23.1717	-23.6064
68.8185	-31.2799	-24.1261	-19.8859	-23.1732	-23.6039
68.8512	-31.2627	-24.106	-19.8805	-23.176	-23.6011
68.8838	-31.2453	-24.0852	-19.8751	-23.1801	-23.5978
68.9164	-31.2278	-24.0635	-19.8695	-23.1854	-23.5942
68.9491	-31.2101	-24.041	-19.8639	-23.1921	-23.5902
68.9817	-31.1922	-24.0178	-19.8583	-23.2001	-23.5858
69.0144	-31.1742	-23.9938	-19.8525	-23.2093	-23.581
69.047	-31.1561	-23.969	-19.8467	-23.2199	-23.5758
69.0796	-31.1378	-23.9435	-19.8409	-23.2317	-23.5702
69.1123	-31.1195	-23.9172	-19.835	-23.2448	-23.5643
69.1449	-31.1011	-23.8902	-19.8291	-23.259	-23.558
69.1775	-31.0826	-23.8626	-19.8231	-23.2744	-23.5514
69.2102	-31.064	-23.8343	-19.8171	-23.2908	-23.5445
69.2428	-31.0455	-23.8054	-19.8111	-23.3081	-23.5373
69.2755	-31.0269	-23.776	-19.805	-23.3264	-23.5299
69.3081	-31.0083	-23.7461	-19.7988	-23.3455	-23.5222
69.3407	-30.9898	-23.7157	-19.7926	-23.3654	-23.5143
69.3734	-30.9714	-23.685	-19.7863	-23.3858	-23.5063
69.406	-30.9531	-23.654	-19.78	-23.4067	-23.4982
69.4386	-30.935	-23.6228	-19.7736	-23.4281	-23.4899
69.4713	-30.9171	-23.5913	-19.767	-23.4498	-23.4816
69.5039	-30.8993	-23.5598	-19.7604	-23.4716	-23.4732
69.5366	-30.8819	-23.5283	-19.7537	-23.4936	-23.4648
69.5692	-30.8646	-23.4969	-19.7469	-23.5155	-23.4565
69.6018	-30.8477	-23.4655	-19.7399	-23.5373	-23.4482
69.6345	-30.8311	-23.4344	-19.7328	-23.5588	-23.4399
69.6671	-30.8148	-23.4036	-19.7255	-23.58	-23.4317
69.6997	-30.7988	-23.3731	-19.7181	-23.6008	-23.4236
69.7324	-30.7832	-23.343	-19.7106	-23.621	-23.4156
69.765	-30.7679	-23.3135	-19.7028	-23.6406	-23.4077
69.7977	-30.7529	-23.2845	-19.6949	-23.6595	-23.3998
69.8303	-30.7382	-23.2562	-19.6868	-23.6775	-23.392
69.8629	-30.7239	-23.2286	-19.6784	-23.6946	-23.3842
69.8956	-30.7099	-23.2018	-19.6699	-23.7108	-23.3765
69.9282	-30.6962	-23.1758	-19.6611	-23.7259	-23.3688
69.9608	-30.6828	-23.1506	-19.6521	-23.7399	-23.3611
69.9935	-30.6697	-23.1264	-19.6429	-23.7527	-23.3533
70.0261	-30.6567	-23.1031	-19.6335	-23.7643	-23.3456
70.0587	-30.6441	-23.0809	-19.6238	-23.7746	-23.3377
70.0914	-30.6316	-23.0596	-19.6138	-23.7835	-23.3298
70.124	-30.6193	-23.0393	-19.6036	-23.7911	-23.3217
70.1567	-30.6071	-23.0201	-19.5931	-23.7973	-23.3135
70.1893	-30.595	-23.0019	-19.5824	-23.8021	-23.3051
70.2219	-30.583	-22.9848	-19.5714	-23.8054	-23.2965
70.2546	-30.571	-22.9688	-19.5601	-23.8073	-23.2877
70.2872	-30.559	-22.9539	-19.5486	-23.8077	-23.2786
70.3198	-30.5469	-22.94	-19.5368	-23.8067	-23.2692
70.3525	-30.5348	-22.9271	-19.5247	-23.8043	-23.2595
70.3851	-30.5226	-22.9153	-19.5125	-23.8005	-23.2495
70.4178	-30.5102	-22.9045	-19.4999	-23.7953	-23.2391
70.4504	-30.4977	-22.8947	-19.4872	-23.7888	-23.2283
70.483	-30.4849	-22.8859	-19.4743	-23.7811	-23.2171
70.5157	-30.472	-22.878	-19.4612	-23.7722	-23.2054
70.5483	-30.4587	-22.871	-19.4479	-23.7622	-23.1933
70.5809	-30.4452	-22.8648	-19.4344	-23.7511	-23.1808
70.6136	-30.4314	-22.8595	-19.4208	-23.739	-23.1677
70.6462	-30.4173	-22.8549	-19.407	-23.7261	-23.1542
70.6789	-30.4028	-22.8511	-19.3932	-23.7124	-23.1401
70.7115	-30.388	-22.848	-19.3792	-23.698	-23.1254
70.7441	-30.3727	-22.8456	-19.3651	-23.6831	-23.1102
70.7768	-30.3571	-22.8437	-19.351	-23.6676	-23.0943
70.8094	-30.341	-22.8424	-19.3368	-23.6517	-23.0779
70.842	-30.3245	-22.8416	-19.3224	-23.6355	-23.0608
70.8747	-30.3076	-22.8412	-19.3081	-23.6191	-23.0431
70.9073	-30.2903	-22.8413	-19.2937	-23.6026	-23.0247
70.9399	-30.2725	-22.8417	-19.2792	-23.586	-23.0056
70.9726	-30.2544	-22.8424	-19.2648	-23.5695	-22.9859
71.0052	-30.2358	-22.8434	-19.2503	-23.553	-22.9655
71.0379	-30.2168	-22.8447	-19.2358	-23.5367	-22.9444
71.0705	-30.1974	-22.8461	-19.2214	-23.5207	-22.9227
71.1031	-30.1776	-22.8477	-19.2069	-23.5049	-22.9003
71.1358	-30.1574	-22.8494	-19.1925	-23.4894	-22.8773
71.1684	-30.1369	-22.8511	-19.1782	-23.4743	-22.8536
71.201	-30.116	-22.853	-19.1638	-23.4596	-22.8294
71.2337	-30.0949	-22.8549	-19.1495	-23.4452	-22.8045
71.2663	-30.0735	-22.8568	-19.1353	-23.4313	-22.7792
71.299	-30.0519	-22.8588	-19.121	-23.4178	-22.7533
71.3316	-30.0301	-22.8607	-19.1069	-23.4047	-22.727
71.3642	-30.0081	-22.8627	-19.0927	-23.392	-22.7002
71.3969	-29.9861	-22.8646	-19.0787	-23.3798	-22.6731
71.4295	-29.9641	-22.8666	-19.0646	-23.3679	-22.6457
71.4621	-29.942	-22.8686	-19.0507	-23.3564	-22.618
71.4948	-29.92	-22.8706	-19.0368	-23.3453	-22.5901
71.5274	-29.8982	-22.8727	-19.023	-23.3345	-22.5619
71.5601	-29.8765	-22.8748	-19.0092	-23.324	-22.5337
71.5927	-29.8551	-22.8771	-18.9956	-23.3138	-22.5054
71.6253	-29.8339	-22.8794	-18.982	-23.3039	-22.4771
71.658	-29.8131	-22.8819	-18.9686	-23.2941	-22.4487
71.6906	-29.7927	-22.8845	-18.9553	-23.2846	-22.4204
71.7232	-29.7727	-22.8873	-18.9421	-23.2751	-22.3923
71.7559	-29.7532	-22.8904	-18.9291	-23.2658	-22.3642
71.7885	-29.7343	-22.8937	-18.9162	-23.2566	-22.3364
71.8211	-29.7159	-22.8972	-18.9036	-23.2473	-22.3087
71.8538	-29.6982	-22.9011	-18.8911	-23.238	-22.2813
71.8864	-29.6812	-22.9052	-18.8789	-23.2287	-22.2542
71.9191	-29.6649	-22.9097	-18.8668	-23.2192	-22.2273
71.9517	-29.6493	-22.9145	-18.8551	-23.2095	-22.2008
71.9843	-29.6345	-22.9196	-18.8435	-23.1996	-22.1746
72.017	-29.6204	-22.925	-18.8322	-23.1894	-22.1487
72.0496	-29.6071	-22.9307	-18.8212	-23.1789	-22.1232
72.0822	-29.5947	-22.9367	-18.8104	-23.1679	-22.0981
72.1149	-29.583	-22.943	-18.7999	-23.1566	-22.0733
72.1475	-29.5721	-22.9495	-18.7896	-23.1448	-22.049
72.1802	-29.562	-22.9563	-18.7795	-23.1325	-22.025
72.2128	-29.5527	-22.9633	-18.7697	-23.1196	-22.0013
72.2454	-29.5442	-22.9705	-18.7601	-23.1061	-21.9781
72.2781	-29.5364	-22.9778	-18.7507	-23.0921	-21.9552
72.3107	-29.5294	-22.9853	-18.7416	-23.0774	-21.9327
72.3433	-29.523	-22.9928	-18.7326	-23.062	-21.9105
72.376	-29.5174	-23.0004	-18.7239	-23.0459	-21.8887
72.4086	-29.5123	-23.008	-18.7154	-23.0292	-21.8673
72.4413	-29.5079	-23.0156	-18.7071	-23.0118	-21.8461
72.4739	-29.5041	-23.023	-18.6989	-22.9936	-21.8254
72.5065	-29.5008	-23.0304	-18.691	-22.9747	-21.8049
72.5392	-29.498	-23.0375	-18.6832	-22.9552	-21.7847
72.5718	-29.4957	-23.0445	-18.6756	-22.9349	-21.7649
72.6044	-29.4939	-23.0512	-18.6681	-22.9139	-21.7453
72.6371	-29.4924	-23.0575	-18.6608	-22.8923	-21.726
72.6697	-29.4913	-23.0635	-18.6536	-22.87	-21.7069
72.7023	-29.4906	-23.0691	-18.6465	-22.847	-21.6881
72.735	-29.4901	-23.0742	-18.6396	-22.8235	-21.6695
72.7676	-29.4899	-23.0788	-18.6327	-22.7993	-21.651
72.8003	-29.49	-23.0829	-18.6259	-22.7746	-21.6327
72.8329	-29.4903	-23.0863	-18.6192	-22.7494	-21.6146
72.8655	-29.4908	-23.089	-18.6125	-22.7237	-21.5966
72.8982	-29.4914	-23.091	-18.6058	-22.6976	-21.5786
72.9308	-29.4922	-23.0923	-18.5991	-22.6711	-21.5608
72.9634	-29.4931	-23.0926	-18.5924	-22.6442	-21.543
72.9961	-29.4939	-23.0921	-18.5857	-22.617	-21.5252
73.0287	-29.4948	-23.0906	-18.5789	-22.5895	-21.5075
73.0614	-29.4956	-23.0881	-18.5721	-22.5618	-21.4897
73.094	-29.4964	-23.0845	-18.5652	-22.5338	-21.472
73.1266	-29.4969	-23.0798	-18.5582	-22.5056	-21.4541
73.1593	-29.4973	-23.0739	-18.5511	-22.4772	-21.4362
73.1919	-29.4974	-23.0668	-18.5439	-22.4487	-21.4182
73.2245	-29.4971	-23.0585	-18.5365	-22.4201	-21.4001
73.2572	-29.4965	-23.0488	-18.5289	-22.3914	-21.3819
73.2898	-29.4955	-23.0378	-18.5212	-22.3627	-21.3636
73.3225	-29.494	-23.0255	-18.5132	-22.3338	-21.3452
73.3551	-29.4919	-23.0118	-18.5051	-22.305	-21.3266
73.3877	-29.4893	-22.9966	-18.4968	-22.2762	-21.3079
73.4204	-29.486	-22.9801	-18.4882	-22.2475	-21.2892
73.453	-29.4821	-22.9622	-18.4794	-22.2188	-21.2703
73.4856	-29.4774	-22.9429	-18.4703	-22.1902	-21.2513
73.5183	-29.4718	-22.9223	-18.4611	-22.1617	-21.2322
73.5509	-29.4655	-22.9002	-18.4515	-22.1334	-21.2131
73.5836	-29.4582	-22.8768	-18.4418	-22.1052	-21.1938
73.6162	-29.4499	-22.8521	-18.4317	-22.0773	-21.1746
73.6488	-29.4407	-22.826	-18.4214	-22.0495	-21.1552
73.6815	-29.4305	-22.7987	-18.4109	-22.022	-21.1358
73.7141	-29.4192	-22.7701	-18.4001	-21.9948	-21.1164
73.7467	-29.4068	-22.7404	-18.3891	-21.9678	-21.097
73.7794	-29.3933	-22.7095	-18.3778	-21.9411	-21.0776
73.812	-29.3787	-22.6775	-18.3663	-21.9147	-21.0582
73.8446	-29.3629	-22.6445	-18.3547	-21.8887	-21.0389
73.8773	-29.346	-22.6105	-18.3428	-21.863	-21.0196
73.9099	-29.3279	-22.5755	-18.3307	-21.8376	-21.0003
73.9426	-29.3086	-22.5397	-18.3185	-21.8125	-20.9811
73.9752	-29.2881	-22.503	-18.3061	-21.7879	-20.962
74.0078	-29.2665	-22.4656	-18.2936	-21.7636	-20.9429
74.0405	-29.2437	-22.4275	-18.281	-21.7397	-20.9239
74.0731	-29.2197	-22.3888	-18.2683	-21.7162	-20.905
74.1057	-29.1946	-22.3495	-18.2556	-21.6931	-20.8861
74.1384	-29.1683	-22.3096	-18.2428	-21.6704	-20.8673
74.171	-29.1409	-22.2693	-18.23	-21.6482	-20.8486
74.2037	-29.1125	-22.2287	-18.2173	-21.6264	-20.8299
74.2363	-29.083	-22.1877	-18.2045	-21.6051	-20.8113
74.2689	-29.0524	-22.1464	-18.1918	-21.5843	-20.7927
74.3016	-29.0209	-22.1048	-18.1792	-21.564	-20.7742
74.3342	-28.9884	-22.0631	-18.1667	-21.5441	-20.7557
74.3668	-28.955	-22.0213	-18.1543	-21.5248	-20.7372
74.3995	-28.9207	-21.9793	-18.142	-21.5061	-20.7188
74.4321	-28.8856	-21.9374	-18.1299	-21.4878	-20.7003
74.4648	-28.8496	-21.8954	-18.1179	-21.4702	-20.6819
74.4974	-28.8129	-21.8534	-18.1061	-21.453	-20.6635
74.53	-28.7755	-21.8115	-18.0945	-21.4365	-20.645
74.5627	-28.7374	-21.7697	-18.0831	-21.4204	-20.6266
74.5953	-28.6987	-21.7281	-18.0718	-21.4049	-20.6081
74.6279	-28.6595	-21.6867	-18.0608	-21.39	-20.5896
74.6606	-28.6198	-21.6454	-18.0499	-21.3755	-20.571
74.6932	-28.5798	-21.6044	-18.0393	-21.3616	-20.5524
74.7258	-28.5394	-21.5637	-18.0289	-21.3482	-20.5338
74.7585	-28.4988	-21.5233	-18.0187	-21.3352	-20.5151
74.7911	-28.458	-21.4832	-18.0088	-21.3227	-20.4964
74.8238	-28.4172	-21.4435	-17.999	-21.3107	-20.4777
74.8564	-28.3765	-21.4042	-17.9895	-21.299	-20.4589
74.889	-28.3358	-21.3652	-17.9802	-21.2878	-20.4401
74.9217	-28.2954	-21.3267	-17.9712	-21.2769	-20.4213
74.9543	-28.2553	-21.2886	-17.9623	-21.2664	-20.4024
74.9869	-28.2157	-21.2509	-17.9536	-21.2562	-20.3835
75.0196	-28.1764	-21.2137	-17.9451	-21.2463	-20.3646
75.0522	-28.1378	-21.1769	-17.9367	-21.2367	-20.3457
75.0849	-28.0998	-21.1407	-17.9286	-21.2273	-20.3268
75.1175	-28.0625	-21.1049	-17.9205	-21.218	-20.3079
75.1501	-28.026	-21.0696	-17.9126	-21.2089	-20.289
75.1828	-27.9903	-21.0348	-17.9048	-21.2	-20.2702
75.2154	-27.9555	-21.0005	-17.8971	-21.1911	-20.2513
75.248	-27.9217	-20.9667	-17.8895	-21.1823	-20.2326
75.2807	-27.8888	-20.9334	-17.882	-21.1735	-20.2139
75.3133	-27.857	-20.9005	-17.8745	-21.1647	-20.1954
75.346	-27.8263	-20.8682	-17.867	-21.156	-20.1771
75.3786	-27.7967	-20.8364	-17.8595	-21.1472	-20.1591
75.4112	-27.7682	-20.805	-17.8521	-21.1383	-20.1414
75.4439	-27.7408	-20.7741	-17.8446	-21.1294	-20.124
75.4765	-27.7145	-20.7436	-17.8371	-21.1205	-20.1072
75.5091	-27.6894	-20.7136	-17.8295	-21.1114	-20.0908
75.5418	-27.6655	-20.684	-17.8219	-21.1022	-20.0752
75.5744	-27.6426	-20.6547	-17.8141	-21.0929	-20.0602
75.607	-27.6209	-20.6258	-17.8061	-21.0835	-20.0461
75.6397	-27.6002	-20.5973	-17.798	-21.0739	-20.033
75.6723	-27.5806	-20.5691	-17.7898	-21.0641	-20.0209
75.705	-27.5621	-20.5412	-17.7812	-21.0542	-20.0099
75.7376	-27.5445	-20.5136	-17.7725	-21.0442	-20.0002
75.7702	-27.528	-20.4862	-17.7635	-21.0339	-19.9919
75.8029	-27.5123	-20.4591	-17.7542	-21.0236	-19.9851
75.8355	-27.4976	-20.4322	-17.7446	-21.013	-19.9799
75.8681	-27.4837	-20.4055	-17.7347	-21.0024	-19.9764
75.9008	-27.4706	-20.379	-17.7244	-20.9916	-19.9748
75.9334	-27.4583	-20.3527	-17.7138	-20.9808	-19.9751
75.9661	-27.4466	-20.3265	-17.7029	-20.9699	-19.9774
75.9987	-27.4357	-20.3005	-17.6916	-20.9589	-19.9819
76.0313	-27.4253	-20.2746	-17.6799	-20.948	-19.9887
76.064	-27.4154	-20.2489	-17.6679	-20.9371	-19.9977
76.0966	-27.4061	-20.2233	-17.6555	-20.9263	-20.0092
76.1292	-27.3972	-20.1978	-17.6427	-20.9156	-20.0231
76.1619	-27.3887	-20.1723	-17.6296	-20.905	-20.0397
76.1945	-27.3805	-20.147	-17.6161	-20.8947	-20.0588
76.2272	-27.3727	-20.1218	-17.6024	-20.8845	-20.0807
76.2598	-27.3651	-20.0967	-17.5883	-20.8747	-20.1053
76.2924	-27.3577	-20.0716	-17.574	-20.8652	-20.1326
76.3251	-27.3505	-20.0466	-17.5594	-20.856	-20.1628
76.3577	-27.3435	-20.0217	-17.5446	-20.8473	-20.1958
76.3903	-27.3365	-19.9968	-17.5296	-20.8389	-20.2317
76.423	-27.3296	-19.972	-17.5144	-20.8311	-20.2705
76.4556	-27.3228	-19.9473	-17.4991	-20.8237	-20.3121
76.4883	-27.316	-19.9226	-17.4836	-20.8169	-20.3566
76.5209	-27.3091	-19.8979	-17.4681	-20.8106	-20.4039
76.5535	-27.3023	-19.8733	-17.4525	-20.8049	-20.4541
76.5862	-27.2953	-19.8487	-17.4368	-20.7998	-20.507
76.6188	-27.2883	-19.8241	-17.4211	-20.7953	-20.5627
76.6514	-27.2813	-19.7996	-17.4055	-20.7914	-20.621
76.6841	-27.2741	-19.775	-17.3898	-20.7882	-20.682
76.7167	-27.2668	-19.7504	-17.3742	-20.7855	-20.7456
76.7493	-27.2595	-19.7259	-17.3586	-20.7835	-20.8117
76.782	-27.252	-19.7014	-17.3431	-20.7821	-20.8802
76.8146	-27.2444	-19.6769	-17.3276	-20.7813	-20.951
76.8473	-27.2368	-19.6524	-17.3123	-20.7811	-21.024
76.8799	-27.229	-19.6279	-17.297	-20.7815	-21.0991
76.9125	-27.2212	-19.6034	-17.2817	-20.7824	-21.1763
76.9452	-27.2134	-19.579	-17.2666	-20.7838	-21.2553
76.9778	-27.2055	-19.5547	-17.2515	-20.7857	-21.336
77.0104	-27.1976	-19.5304	-17.2366	-20.788	-21.4183
77.0431	-27.1897	-19.5062	-17.2217	-20.7907	-21.5021
77.0757	-27.1819	-19.4821	-17.2068	-20.7938	-21.5872
77.1084	-27.1741	-19.4581	-17.1921	-20.7972	-21.6735
77.141	-27.1663	-19.4343	-17.1773	-20.8008	-21.7607
77.1736	-27.1587	-19.4107	-17.1627	-20.8046	-21.8489
77.2063	-27.1512	-19.3872	-17.148	-20.8086	-21.9376
77.2389	-27.1438	-19.364	-17.1334	-20.8126	-22.0269
77.2715	-27.1366	-19.3411	-17.1187	-20.8166	-22.1166
77.3042	-27.1295	-19.3184	-17.104	-20.8206	-22.2065
77.3368	-27.1225	-19.296	-17.0893	-20.8245	-22.2965
77.3695	-27.1157	-19.274	-17.0745	-20.8282	-22.3864
77.4021	-27.109	-19.2522	-17.0596	-20.8316	-22.4761
77.4347	-27.1024	-19.2308	-17.0446	-20.8347	-22.5654
77.4674	-27.0958	-19.2098	-17.0294	-20.8374	-22.6543
77.5	-27.0894	-19.1891	-17.0141	-20.8397	-22.7426
77.5326	-27.0829	-19.1687	-16.9986	-20.8415	-22.8302
77.5653	-27.0765	-19.1488	-16.9828	-20.8427	-22.917
77.5979	-27.07	-19.1292	-16.9667	-20.8432	-23.0029
77.6305	-27.0634	-19.11	-16.9504	-20.8431	-23.0878
77.6632	-27.0567	-19.0912	-16.9338	-20.8422	-23.1717
77.6958	-27.0497	-19.0727	-16.9168	-20.8406	-23.2544
77.7285	-27.0425	-19.0546	-16.8994	-20.8381	-23.336
77.7611	-27.035	-19.0368	-16.8816	-20.8347	-23.4164
77.7937	-27.027	-19.0194	-16.8635	-20.8304	-23.4955
77.8264	-27.0186	-19.0023	-16.8448	-20.8252	-23.5733
77.859	-27.0096	-18.9855	-16.8258	-20.819	-23.6498
77.8916	-27.0001	-18.9689	-16.8062	-20.8119	-23.725
77.9243	-26.9898	-18.9527	-16.7861	-20.8038	-23.7988
77.9569	-26.9788	-18.9366	-16.7655	-20.7947	-23.8713
77.9896	-26.9669	-18.9208	-16.7444	-20.7846	-23.9424
78.0222	-26.9541	-18.9052	-16.7228	-20.7735	-24.0122
78.0548	-26.9404	-18.8897	-16.7005	-20.7614	-24.0805
78.0875	-26.9255	-18.8744	-16.6777	-20.7484	-24.1475
[truncated: 366 more rows]

## Sheet: 350nm to 330 nm ratio
	Fluorescence ratio Em350 / Em330
[truncated: 2,300 more rows]

## Sheet: First derivatives
Temperature, °C	First derivative: d(Em350/Em330)/dT
[truncated: 2,300 more rows]

[truncated: 1 more sheets: Overview from Prometheus]
