# Supplementary material for: A novel RAB5 binding site in human VPS34-CII that is likely the primordial site in eukaryotic evolution
Source: eLife. 2026 May 28;15:RP110040. doi: 10.7554/eLife.110040 (PMC13218723; doi:10.7554/eLife.110040)
Supplement: Figure 2—figure supplement 5—source data 1. [file elife-110040-fig2-figsupp5-data1.xlsx]

## Sheet: wt
0	Diameter	channel_1	channel_2		500	Diameter	channel_1	channel_2		1000	Diameter	channel_1	channel_2		2000	Diameter	channel_1	channel_2		5000	Diameter	channel_1	channel_2		10000	Diameter	channel_1	channel_2		20	Diameter	channel_1	channel_2		30000	Diameter	channel_1	channel_2
	103.037	59.5744	0.005764	2.28957e-05		93.1593	96.3912	2.6875	0.0118009		89.7035	63.0509	8.60121	0.051089		58.4465	80.9705	23.2933	0.158988		89.7035	128.589	69.1808	0.2928		121.387	67.5991	92.9843	0.411016		83.2905	105.117	177.183	0.500232		62.8182	113.72	237.225	0.352841
	118.044	65.134	0.006971	3.94725e-05		62.8182	97.2278	2.62997	0.0111076		79.583	82.5082	9.34615	0.0480698		70.0076	105.077	27.2869	0.16052		94.8215	91.4212	60.4498	0.316336		67.8945	131.525	118.424	0.404667		79.583	115.533	181.903	0.495987		81.3501	43.8527	227.116	0.684478
	109.832	90.7204	0.011824	8.18339e-05		113.045	85.7878	2.51057	0.011197		103.037	89.8948	9.58854	0.0468163		94.8215	65.9565	22.8696	0.188755		101.475	96.7402	57.2693	0.266066		81.3501	76.5543	91.832	0.347884		88.2237	110.895	182.576	0.5228		54.9799	50.7712	216.775	0.387525
	93.1593	111.692	0.011574	6.42301e-05		83.2905	102.221	2.68289	0.0110827		83.2905	62.7497	7.87929	0.0398295		58.4465	121.216	28.9375	0.152765		104.743	92.8476	54.6286	0.24878		109.832	73.8662	93.7652	0.386715		106.456	84	169.608	0.53581		64.9342	53.7659	209.344	0.227732
	114.664	71.0166	0.00369	-9.99766e-06		91.3517	82.5924	2.36848	0.00990987		84.8979	73.4603	8.84231	0.0471317		79.583	74.6113	21.2129	0.144655		89.7035	90.0134	52.4587	0.232506		71.5207	85.118	96.9953	0.373544		113.045	55.2502	147.048	0.406304		71.5207	56.073	219.592	0.401113
	86.4347	52.5265	0.006313	3.64197e-05		70.0076	73.601	2.34295	0.0107736		61.7187	71.9426	8.87963	0.0486448		76.4326	77.7994	22.1483	0.150751		88.2237	103.457	60.5714	0.28071		81.3501	108.474	111.263	0.424649		113.045	84.0592	163.265	0.459969		64.9342	65.778	223.739	0.404991
	89.7035	59.4551	0.007282	4.84736e-05		88.2237	77.6084	2.3202	0.00992418		103.037	91.5844	10.6135	0.0571444		66.6156	76.9969	22.0248	0.150718		89.7035	74.8157	50.6405	0.255434		89.7035	70.3865	89.4651	0.344741		74.8781	62.8095	144.092	0.31034		54.9799	77.7261	221.276	0.31104
	146.245	64.6671	0.007143	4.24172e-05		74.8781	55.4608	1.94954	0.00720401		84.8979	72.924	9.24005	0.0529325		71.5207	63.3307	19.0668	0.136534		78.4525	58.494	44.5628	0.222806		118.044	95.6801	110.659	0.47512		79.583	63.2294	145.861	0.336257		73.2426	48.0305	207.181	0.209896
	96.3458	80.1194	0	-5.4918e-05		73.2426	47.6463	2.1875	0.0133798		103.037	80.5896	9.67292	0.0532689		73.2426	109.863	27.4497	0.155009		88.2237	78.6022	53.4495	0.278866		89.7035	101.195	109.464	0.437407		88.2237	64.3387	152.78	0.437988		67.8945	54.0613	201.93	0.0893523
	103.037	68.1146	0.258333	0.00372803		101.475	101.195	2.78809	0.0122347		76.4326	119.243	11.6759	0.0527988		58.4465	95.2362	25.3484	0.156751		70.0076	80.5208	51.4327	0.247175		101.475	88.5359	101.471	0.40967		84.8979	57.6718	145.764	0.366975		62.8182	58.2932	203.339	0.107028
	86.4347	44.8472	0.005051	1.4516e-05		67.8945	93.8015	3.1403	0.0169539		113.045	69.9676	8.54568	0.0452449		64.9342	49.2745	18.2483	0.158871		86.4347	89.2717	53.8151	0.249632		79.583	101.295	102.547	0.368691		107.848	86.1117	175.087	0.586297		70.0076	76.9796	199.809	0.035195
	83.2905	37.0051	0.006402	5.41007e-05		94.8215	85.2306	2.52397	0.0114275		124.584	78.9356	9.65167	0.0541159		74.8781	61.351	19.3273	0.145186		79.583	86.0536	49.3159	0.206684		81.3501	69.5432	82.2649	0.245386		93.1593	81.1875	169.461	0.552556		53.3925	61.5784	195.965	-0.0184367
	81.3501	26.7378	0.008108	0.00013868		76.4326	49.0392	1.92298	0.00760575		73.2426	93.6737	9.88608	0.048104		61.7187	59.742	19.3878	0.150109		91.3517	52.9443	42.1706	0.200977		84.8979	46.7223	79.8136	0.312776		88.2237	87.8374	163.913	0.447561		88.2237	51.8017	219.985	0.441785
	107.848	35.5934	0.008491	0.000114937		86.4347	65.0833	2.12753	0.0088737		76.4326	98.077	10.0872	0.047995		101.475	57.0912	17.6372	0.126415		73.2426	78.2195	45.9543	0.184408		122.753	80.0216	102.736	0.469076		84.8979	84.7283	149.377	0.292429		62.8182	79.3847	216.858	0.248884
	91.3517	36.0228	0.011416	0.000194766		81.3501	65.9635	2.07973	0.00803065		93.1593	51.5451	7.85764	0.0480674		71.5207	55.2298	18.7314	0.150488		66.6156	82.5469	51.3469	0.240068		59.8415	76.0346	96.5519	0.412337		73.2426	82.0259	151.841	0.332109		61.7187	55.6944	205.361	0.148329
						106.456	80.682	3.012	0.0181205		78.1811	96.7119	9.98023	0.0475663		70.0076	71.0449	18.4137	0.112516		71.5207	77.6289	49.8075	0.235447		61.7187	78.7315	99.9	0.440738		71.5207	71.2764	140.053	0.216801		86.4347	64.8822	227.005	0.460909
	Diameter	channel_1	channel_2								83.2905	88.2921	9.66842	0.0485708		79.583	66.3438	19.0223	0.129662		96.3458	55.4405	46.0925	0.262669		76.4326	57.7776	86.8866	0.375346		78.1811	64.8701	131.746	0.110156		76.4326	62.6701	207.584	0.167293
	46.5858	0	0.0025773	0.00447638		Diameter	channel_1	channel_2			99.6419	38.2802	7.32328	0.0507646		67.8945	87.7981	21.8701	0.130414		114.664	70.8976	52.0898	0.289993		71.5207	71.0391	88.5681	0.328947		83.2905	81.0776	156.579	0.394423		78.1811	48.9802	214.746	0.360264
	60.0448	0.114504	0.0038168			14.4498	0	1.39655	1.54839		83.2905	64.0631	8.69251	0.051707		81.3501	71.3385	19.4234	0.126207		76.4326	50.4233	41.1004	0.189801		88.2237	68.1687	91.8658	0.391174		93.1593	56.7121	142.845	0.321714		56.5848	107.538	227.604	0.283655
	19.8295	0	0			14.5338	0	1.61667			70.0076	64.8925	8.56866	0.0491376		101.475	57.7236	19.9979	0.165927		107.848	42.3646	39.2441	0.182088		96.3458	51.7478	85.3225	0.388857		67.8945	56.8167	141.881	0.304154		66.6156	86.4443	231.348	0.396186
	19.1013	0	0			11.3973	0	1.7027																		70.0076	62.0879	82.9329	0.28561		73.2426	71.5518	146.174	0.301513		71.5207	74.4326	220.256	0.311104
	19.2229	0.060976	0			13.5115	0	1.88461			Diameter	channel_1	channel_2													62.8182	59.4457	88.8134	0.397226							61.7187	88.2263	220.069	0.260345
	25.9176	0.224138	0.0057471			12.3142	0	1.35714			15.6917	0	5.85714	5.37523		Diameter	channel_1	channel_2			Diameter	channel_1	channel_2
	32.4659	0.334711	0.0082645			15.1202	0	1.65625			15.1202	0	5.42188			16.1313	0	8.38889	10.4214		9.482	2	29.9583	31.5284
	23.4733	0	0			11.3141	0	1.41667			8.5164	0	5.35			11.9153	0	11.5405			15.5642	1.2899	31.2174			Diameter	channel_1	channel_2			Diameter	channel_1	channel_2			Diameter	channel_1	channel_2
	26.9305	0	0.0107527			13.5115	0	1.78846			9.482	0.0416667	5.75			19.8295	0	11.4375			7.52859	0.125	32.375			36.7171	0	63.4062	65.1987		21.1042	0	123.607	124.115		23.4026	0	207.355	197.099
	37.5415	0	0.0136054			9.58801	0.0384615	1.30769			20.1837	0	4.96491			11.3973	0.027027	10.3514			15.1202	2.0938	32.8438			21.9312	0	67.697			21.9006	0	122.167			19.9729	0	210.411
						15.6917	0	1.35714			13.8351	0	5.29787			15.7581	0	11.7097			10.9965	0	31.7941			14.5338	0	67.1167			12.3142	0	122.905			11.3141	0	213.944
											12.4482	0	5.04545			29.9541	0	10.9259			8.43169	0	31.2143			17.3898	0	70.5465			22.6262	0	126.031			16.2499	0.1017	186.661
											20.1837	0	5.50877			11.3141	0.027778	10.5278			12.8796	0	32.8333			21.8429	0	65.2812			13.2936	0	129.083			19.1013	0.0098	181.892
											17.1233	0.0125	5.15			17.1233	0.25	9.0375			17.2949	0	28.6191			21.1999	0	62.2903			24.4445	0	124.019			32.6718	0	196.248
											15.1202	0	5.40625			16.1313	0	10.7778			15.6917	0	29.7286			16.759	0	59.2			44.2528	0	126.428			20.877	0	193.377
																14.5338	0.95	9.51667			14.5338	25.8667	34.7			27.6759	0	68.9688			21.8059	0	131.585			19.8295	23.2411	186.446
																										25.9293	0	64.6534			16.6161	0	117.954			20.9219	0	203.706
																										24.1285	0	62.8269			25.9729	0	117.368			19.1013	4.0196	190.951

## Sheet: mut
0	Diameter	channel_1	channel_2		100	Diameter	channel_1	channel_2	500	Diameter	channel_1	channel_2		1000	Diameter	channel_1	channel_2		2000	Diameter	channel_1	channel_2		5000	Diameter	channel_1	channel_2		10000	Diameter	channel_1	channel_2		20000	Diameter	channel_1	channel_2		30000	Diameter	channel_1	channel_2
	96.3458	83.0491	0.011161	-0.000796384		83.2905	77.2414	0.155172		67.8945	105.907	1.83775	-0.00327349		84.8979	71.8115	1.95513	0.0133005		81.3501	73.1635	8.05	-0.017085		128.031	78.7718	27.2394	-0.059166		142.796	102.102	50.9792	-0.0765984		86.4347	122.461	90.3534	-0.141813		113.045	12.1654	179.436	-0.424474
	97.954	49.9923	0.007709	-0.00139203		58.4465	94.9964	0.160142		86.4347	65.2623	2.00722	-0.000610634		58.4465	102.626	2.05709	0.0103004		99.6419	92.0948	7.82328	-0.0160348		81.3501	72.1141	27.7998	-0.0568577		103.037	69.7531	48.0414	-0.154238		121.387	44.821	99.1628	-0.190919		103.037	0.9644	190.379	5.99253
	74.8781	80.8876	0.011834	-0.000809345		76.4326	77.8147	0.183924		59.8415	74.7715	1.88576	-0.00291162		61.7187	72.437	1.92037	0.0127058		86.4347	69.5707	7.5	-0.025873		83.2905	65.3643	28.8357	-0.0468808		149.615	66.9581	50.9806	-0.11678		122.924	59.714	93.1695	-0.24367		81.3501	4.3216	185.365	0.176995
	104.743	63.2163	0.016327	-0.000964514		78.1811	98.9336	0.155797		62.8182	75.5146	2.12565	0.001045		66.6156	108.85	1.84797	0.00779031		96.3458	63.5804	8.53013	-0.0121086		84.8979	85.1642	28.6716	-0.0379075		119.389	80.0685	49.3312	-0.118259		96.3458	72.617	90.5915	-0.235875		96.3458	12.9074	181.151	-0.267234
	93.1593	99.9711	0.325231	0.00248003		86.4347	72.6098	0.151423		67.8945	57.3456	1.9893	-0.00104137		97.954	98.0242	1.92181	0.00940386		99.6419	69.3988	8.02618	-0.0183551		104.743	72.1827	28.2133	-0.0510751		109.832	59.0819	50.7647	-0.136003		104.743	52.394	89.1306	-0.3548		109.832	0.0676	192.71	119.972
	109.832	56.1647	0.011628	-0.00116928		64.9342	107.439	0.176573		74.8781	90.6156	2.00723	-0.000704799		71.5207	137.115	1.72515	0.00528867		101.475	68.9389	8.14161	-0.0168031		104.743	82.4644	27.1114	-0.0580685		109.832	64.8122	48.0113	-0.166461		106.456	30.055	82.165	-0.850274		78.1811	0.0595	191.384	114.01
	89.7035	55.9515	0.006068	-0.0012731		78.1811	94.1962	0.171468		74.8781	92.061	2.05285	-9.55553e-05		103.037	58.6021	1.92708	0.01582		83.2905	93.2394	8.43758	-0.00924952		93.1593	76.3958	26.8345	-0.0663061		128.031	47.2635	47.7435	-0.233933		103.037	61.289	86.9969	-0.338121		88.2237	29.5994	173.884	-0.362048
	103.037	115.044	0.025278	-0.00045219		66.6156	60.1588	0.173486		94.8215	43.7734	2.01663	-0.000457365		59.8415	55.4519	2.00962	0.018207		99.6419	74.083	8.61961	-0.00918416		78.1811	78.6322	26.2257	-0.0721627		104.743	51.5754	47.5922	-0.217309		89.7035	53.995	85.6042	-0.40959		81.3501	36.0819	171.397	-0.365931
	113.045	65.4748	0.011894	-0.000998949		64.9342	92.2718	0.136738		94.8215	81.3356	2.00114	-0.000620724		73.2426	48.6494	1.84299	0.0173278		103.037	70.7142	8.59726	-0.00993775		118.073	51.5941	27.7477	-0.0804794		124.584	51.3229	49.3339	-0.184442		141.226	24.867	95.3339	-0.498094		78.1811	1.8927	186.22	0.856079
	114.664	63.3524	0.009225	-0.00107454		74.8781	92.493	0.155899		66.6156	65.3412	1.90709	-0.00229533		67.8945	85.2136	1.71358	0.00837397		91.3517	63.3087	8.37683	-0.014582		94.8215	73.3258	26.5708	-0.0726778		97.954	41.8899	50.804	-0.190882		139.513	22.237	99.3063	-0.378365		97.954	13.7159	170.667	-1.0158
	84.8979	70.0192	0.010256	-0.000957509		83.2905	58.4816	0.168421		116.291	54.6931	1.94723	-0.000969724		71.5207	99.7609	1.78106	0.00782928		121.387	63.4321	9.10976	-0.00299911		89.7035	120.175	27.5104	-0.0365266		109.832	44.3868	50.8379	-0.179381		106.456	39.503	95.506	-0.309192		111.182	8.4693	171.967	-1.49158
	74.8781	57.6553	0.002959	-0.0012894		86.4347	59.1881	0.181818		70.0076	46.399	1.72436	-0.00479435		64.9342	87.4132	1.84028	0.00961271		131.226	83.9968	8.66853	-0.00751779		103.037	79.2954	28.6048	-0.0415561		109.832	69.1454	45.7068	-0.189357		89.7035	4.4	103.212	-1.02445		126.361	11.3561	163.15	-1.88884
	104.743	56.448	0.013265	-0.00113441		70.0076	95.5542	0.167169		99.6419	88.9601	1.92457	-0.00135918		62.8182	81.1051	1.8913	0.0109895		83.2905	85.7776	7.86447	-0.0167355		106.456	84.8607	27.471	-0.0521911		116.291	56.8101	44.7084	-0.248048		97.954	13.11	104	-0.283753		94.8215	23.9846	164.286	-0.846952
	86.4347	64.6641	0.017677	-0.000922042		71.5207	66.5695	0.155198		76.4326	50.4826	1.80233	-0.00337126		96.3458	73.9866	2.02232	0.0138177		99.6419	91.7974	8.43668	-0.00940462		124.584	74.6514	24.9658	-0.0928876		113.045	67.4211	42.8177	-0.237052		116.291	23.159	102.296	-0.234194		97.954	15.283	171.218	-0.875607
	99.6419	89.7392	0.018319	-0.000657249		76.4326	75.1875	0.140988		66.6156	89.4189	1.90541	-0.0023207		74.8781	133.868	2.02367	0.00764684		109.832	61.7219	7.73353	-0.0253795		83.2905	94.4362	23.8163	-0.0856001		103.037	44.4582	45.3937	-0.301548		101.475	31.066	101.138	-0.211884		84.8979	10.8308	174.827	-0.902343
	107.848	58.9279	0.011858	-0.00111054		61.7187	76.1296	0.201852		58.4465	85.435	1.89961	-0.00274429		74.8781	96.1923	2.07544	0.0111801		99.6419	67.4698	7.3028	-0.0296014		84.8979	87.1949	25.3353	-0.0752871		122.924	79.0163	50.908	-0.099878		126.361	38.822	90.3735	-0.446821		103.037	18.3344	175.49	-0.496902
	97.954	67.59	0.0141	-0.00093505		61.7187	60.5099	0.180832		97.954	70.4152	2.11233	0.000534281		97.954	67.4967	2.12775	0.0167083		107.848	63.0524	7.69071	-0.0255231		74.8781	81.1835	25.685	-0.0765553		109.832	87.7692	49.5369	-0.10554		116.721	44.495	91.1126	-0.373242		91.0615	8.6082	170.13	-1.68094
	86.4347	53.5342	0.006211	-0.00132792		54.9799	67.6292	0.214583		78.1811	112.335	2.03256	-0.000350929		61.7187	111.896	1.80556	0.00719913		70.0076	67.9094	8.4489	-0.0125329		109.832	100.653	26.3102	-0.0555356		109.832	73.6124	50.6066	-0.111305		85.4317	34.024	90.7493	-0.498786		124.584	24.1407	161.987	-0.936733
	106.456	53.858	0.016	-0.00113818		89.7035	44.176	0.229369		97.954	81.5564	1.97234	-0.00089491		56.5848	92.5224	1.88211	0.00953406		94.8215	56.21	9.17237	-0.00227059		132.809	53.2619	31.8196	-0.00150915		104.743	45.9945	48.3528	-0.22714		78.1811	40.19	88.0229	-0.4901		118.044	28.2364	164.784	-0.701775
	79.583	52.5975	0.019231	-0.00110403		64.9342	73.9423	0.199301		73.2426	66.4466	1.73018	-0.00450308		74.8781	55.1139	1.77811	0.0141181		74.8781	80.4317	8.48	-0.010195		81.3501	61.3143	28.1881	-0.0605387		103.037	62.9961	48.4251	-0.164691		114.664	13.253	87.3118	-1.53989
	Diameter	channel_1	channel_2							Diameter	channel_1	channel_2
	20.1837	0	0	0.0773708						15.024	0	2.04918	2.05909		Diameter	channel_1	channel_2			Diameter	channel_1	channel_2			Diameter	channel_1	channel_2			Diameter	channel_1	channel_2			Diameter	channel_1	channel_2			Diameter	channel_1	channel_2
	21.8059	0	0.030769							21.1042	0	2.01639			24.1672	0	1.93671	1.90299		15.6917	0	9.6	9.33338		15.6917	0	30.8286	31.8907		25.7977	0	60.2356	58.7972		11.3141	0	105.111	107.726		13.4606	0	187.078	184.613
	9.588	0	0.038462							23.0136	0	1.90972			13.4606	0	1.78431			27.6759	0	9.41667			10.9368	0	30			12.3142	0	60.8571			28.3113	0	106.535			23.4026	0	188.763
	18.7189	0	0.01087							20.1837	0	2.00877			33.2626	0	2.04365			24.9281	0	9.55488			24.8972	0	31.25			23.2183	0	61.0278			16.0073	0	108.809			13.8351	0	188
	26.6625	0	0.011364							9.482	0	2			16.9786	0	2.05333			38.3078	0.00328947	9.56579			16.0073	0	31.2206			27.4623	0	60.879			15.1202	0	105.969			20.1837	0	195.079
	15.3062	0	0							18.4539	0	2.07217			17.9658	0	1.80899			5.6211	0	8.375			15.4114	0	31.8333			21.3585	0	60.2768			19.1457	0	105.25			13.5115	0	178.808
	19.6882	0.04	0							34.3176	0	2.13741			13.4606	0	1.80392			26.9985	0	9.6413			15.7693	0	30.2083			14.4498	0	58.2931			24.8972	0	104.963			17.9416	0	178.866
	25.9729	0.0344828	0							20.1104	0.00892857	2.04464			34.0963	0	1.90458			10.9965	0	9.44118			23.2183	0	32.9097			13.5351	0	60.5			13.5351	0	100.35			39.659	0	189.397
	19.9534	0.0093458	0.682243							21.8429	0	2.14844			12.3142	0	1.61905			15.6917	0	9.61429			37.5464	0	32.9796			22.6561	0.0422535	57.8099			18.1021	0.443182	112.909			9.1945	0	184.15
	20.1837	0.0087719	0							22.6561	0	2.20423			22.3313	0	1.95652			28.6292	0	9.07732			31.7406	0	33.387			14.2602	0	53.9815			13.5115	0	112.462			24.9432	0	168.336
															36.4233	0.0034965	2.11888			27.5428	0	9.04737			22.8267	0	34.2899			28.307	0	54.1111			19.8295	0	114.902			17.3898	0	187.651
