# Supplementary material for: A novel RAB5 binding site in human VPS34-CII that is likely the primordial site in eukaryotic evolution
Source: eLife. 2026 May 28;15:RP110040. doi: 10.7554/eLife.110040 (PMC13218723; doi:10.7554/eLife.110040)
Supplement: Figure 2—source data 1. [file elife-110040-fig2-data1.xlsx]

## Sheet: Figure2A_curves
Time, min	100 nM mCherry-VPS34-CII VPS15 mutant + RAB5A																			100 nM mCherry-VPS34-CII WT + RAB5A																			100 nM mCherry-VPS34-CII WT
0	0.03	0.03	0.03	0.04	0.07	0.09	0.05	0.08	0.03	0.01	0.05	0.03	0.03	0.05	0.03	0.06	0.1	0.04	0.02	0.02	0.04	0.01	0.04	0.07	0.01	0.09	0.05	0.02	0.05	0.04	0.04	0.04	0.02	0.03	0.03	0.02	0.05	0.03	0.02	0.02	0.08	0.08	0.04	0.04	0.07	0.32	0.05	0.05	0.04
2	0.03	0.04	0.08	0.06	0.07	0.04	0.05	0.07	0.03	0.02	0.03	0.03	0.03	0.07		0.05	0.04	0.05	0.02	0.02	0.03	0.04	0.03	0.03	0.03	0.09	0.04	0.03	0.04	0.03	0.03	0.06	0.02	0.04	0.04	0.04	0.05	0	0.02		0.06	0.05	0.06	0.07	0.07	0.32	0.03	0.05	0.05
4	0.02	0.04	0.04	0.05	0.06	0.13	0.06	0.05	0.03	0.01	0.07		0.04	0.06	0.03	0.05		0.05	0.02	0.03	0.04	0.03	0.07	0.04	0.02	0.06	0.05	0.02	0.03	0.03	0.04	0.06	0.02	0.02	0.04	0.04	0.07	0.02	0.02	0.01	0.08	0.06	0.06	0.06	0.06	0.44	0.06	0.07	0.03
6	0.03	0.05	0.04	0.07	0.06	0.1	0.08	0.05		0.01	0.04	0.05	0.04	0.06	0.05		0.16	0.05	0.05	0.04	0.03	0.05	0.07	0.08	0.03	0.05	0.06	0.05	0.03	0.04	0.06	0.07	0.02	0.05	0.04	0.02	0.04	0.02	0.03	0.02	0.1	0.05	0.04	0.06	0.1	0.38	0.04	0.06	0.05
8	0.03	0.03	0.07	0.06	0.09	0.03	0.1	0.05	0.04	0.02	0.05	0.03	0.06	0.07	0.03	0.06	0.03	0.07	0.02	0.05	0.03	0.02	0.06	0.04	0.02	0.05	0.06	0.04	0.05	0.03	0.04	0.04	0.03	0.04	0.04	0.03	0.04	0.03	0.03	0.01	0.11	0.02	0.05	0.07	0.13	0.46	0.06	0.07	0.06
10	0.03	0.07	0.11	0.07	0.06	0.08	0.08	0.04	0.03	0.02	0.08		0.02	0.08		0.05	0.04	0.04	0.02	0.03	0.05	0.04	0.03	0.06	0.02	0.08	0.05	0.04	0.05	0.04	0.04	0.05	0.02	0.04	0.03	0.05	0.04	0.02	0.02		0.14	0.06	0.07	0.06	0.09	0.46	0.08	0.07	0.07
12	0.03	0.09	0.09	0.11	0.11	0.11	0.07	0.06	0.17	0.03	0.06	0.08	0.04	0.06		0.11	0.12	0.05	0.02	0.04	0.02	0.05	0.07	0.03	0.02	0.07	0.06	0.04	0.04	0.03	0.04	0.04	0.02	0.04	0.05	0.03	0.05	0.01	0.01	0.03	0.09	0.03	0.05	0.05	0.1	0.39	0.09	0.08	0.06
14	0.03	0.05	0.11	0.09	0.06	0.07	0	0.06	0.03	0.01	0.07	0.04	0.05	0.06	0.12	0.04	0.04	0.08	0.02	0.02	0.02	0.03	0.03	0.03	0.03	0.09	0.07	0.05	0.06	0.05	0.05	0.06	0.02	0.1	0.05	0.03	0.03	0.04	0.03		0.1	0.06	0.07	0.08	0.12	0.37	0.06	0.08	0.08
16	0.04	0.04	0.05	0.06	0.06	0.06	0.05	0.08		0.03	0.04	0.1	0.03	0.07	0.06	0.09	0.06	0.05	0.04	-0.01	0.01	-0.01	0.02	0.04	0.05	0.08	0.05	0	0.05	0.03	0.04	0.06	0.01	0.08	0.06	-0.03	0.02	0.06	0.05	0.04	0.1	0.06	0.09	0.08	0.04	0.19	0.1	0.11	0.11
18	0.05	0.06	0.13	0.07	0.08	0.05	0.06	0.05	0.14	0.04	0.05	0.03	0.03	0.1		0.04	0	0.05		-0.18	-0.11	-0.25	-0.2	-0.24	0.13	0.03	0.03	0	-0.03	-0.09	-0.11	-0.01	-0.05	0.06	-0.07	-0.15	0.04	0.1	0.05	0.04	0.29	0.09	0.13	0.17	0.12	-0.14	0.14	0.08	0.12
20	0.04	0.06	0.06	0.05	0.05	0.04	0.1	0.05	0.02	0.02	0.06	0.06	0.04	0.07	0.07	0.1	0.08	0.06	0.04	-0.23	-0.26	-0.42	-0.33	-0.37	0.17	0.17	0.11	0.01	0.03	-0.08	-0.14	-0.1	0.02	0.17	-0.09	-0.28	-0.05	0.28	0.05	0.01	0.11	0.12	0.07	0.12	0.09	-0.22	0.18	0.12	0.14
22	0.02	0.05	0.06	0.06	0.05	0.04	0.08	0.05	0.06	0.01	0.07	0.02	0.02	0.07	0.06	0.03	0.07	0.08	0.03	0	0.08	-0.38	-0.17	-0.01	1.27	0.77	0.62	0.96	0.96	0.49	0.61	0.68	0.51	0.89	0.44	0.14	0.68	1.52	0.02		0.26	0.18	0.16	0.21	1.07	-0.42	0.19	0.26	1.91
24	0.03	0.05	0.06	0.09	0.09	0.09	0.07	0.06	0.01		0.07	0.05		0.04		0.05	0.07	0.04	0.03	1.15	1.46	0.6	1.36	2.06	4.06	2.1	2.14	3.08	3.37	2.87	3.22	2.86	2.41	2.83	1.93	1.88	2.84	4.39	0.01	-0.03	0.28	0.07	0.06	0.21	1.03	-0.77	0.4	0.05	0.15
26	0.03	0.05	0.06	0.08	0.06	0.08	0.13	0.06	0.06	0	0.04	0.04		0.06	-0.01	0.08	0.06	0.05	0.04	3.7	4.29	2.67	4.05	5.93	7.58	5.06	4.87	6.69	6.83	6.58	5.94	6.71	5.43	6.15	5.71	5.46	5.7	8.71	0.05	-0.1	0.06	0	0.1	0.06	1.31	-1.07	0.29	-0.19	0.19
28	0.08	0.06	0.07	0.08	0.09	0.09	0.09	0.06	0.05		0.08	-0.02	0.05	0.14	0.21	0.08	0.06	0.06	0.03	7.82	8.41	7.74	9.81	11.24	17.39	8.31	10.02	13.56	15.11	12.88	13.58	11.92	10.51	13.13	12.27	13	10.23	16.32	-0.2	0.27	-0.03	0.05	-0.21	-0.1	0.66	-1.11	0.23	-0.21	0.8
30	0.03	0.07	0.11	0.09	0.14	0.15	0.12	0.08	0.05		0.1	0.04	0.05	0.08		0.11		0.12	0.05	16.81	15.75	18.12	19.18	19.47	26.43	15.92	18.45	23.59	23.84	22.39	22.34	18.93	19.19	23.42	24.39	23.47	20.69	26.52	-0.36	-0.5	-0.06	-0.29	-0.26	-0.19	0.03	-1.27	0.24	-0.49	-0.21
32	0.13	0.05	0.08	0.12	0.14	0.13	0.08	0.08	0.01		0.08	0.01	0.04	0.16	0.08	0.13	-0.09	0.12	0.03	22.68	21.55	22.17	26.22	25.48	30.97	22.96	25.49	30.45	31.63	29.83	30.04	25.87	26.49	30.5	34.95	32.44	25.95	35.81	-0.52	-0.56	-0.39	-0.28	-0.15	-0.32	0.7	-1.47	0.08	0.15	-0.1
34	0	0.06	0.17	0.08	0.11	0.1	0.2	0.05	-0.01	-0.01	0.02	0.13	0.03	0.14	0.06	0.13		0.1	0.06	31.15	29.86	32.35	38.44	37.52	41.37	34.52	36.87	42.63	40.48	40.06	43.32	35.31	37.76	45.68	48.99	45.93	38.51	48.11	-0.82	-0.96	-0.44	-0.59	-0.32	-0.58	-0.03	-1.61	-0.31	-0.64	-0.41
36	-0.09	-0.04	0.04	0.18	0.15	0.07	0.09	-0.01	-0.07		-0.05	-0.08	-0.04	0.06	0.09	0.09	-0.12	0.17	0.04	45.69	42.89	46.28	49.36	50.34	54.23	45.87	54.13	55.94	53.96	55.17	55.12	51.28	52.93	67.88	69.14	55.48	43.05	67.96	-0.57	-1.27	-0.06	-0.53	-0.27	-0.58	-0.26	-1.25	1.11	-0.84	0.54
38	-0.2	-0.14	0.01	0.05	0.14	0.03	0.04	-0.05	-0.17		-0.24		-0.05	0.07	0.03	0.16	-0.12	0.08	-0.18	52.79	48.06	49.1	54.54	56.94	54.88	51.61	62.45	61.22	59.26	63.11	59.31	57.41	60.45	78.27	79.59	58.66	48.46	77.33	-0.94	0.04	-0.59	-0.38	-0.62	-0.17	0.61	-1.64	-0.53	-0.71	0.11
40	-0.24	-0.13	-0.08	0.01	0.04	0.05	0.17	-0.07	-0.24		-0.33			0.03	-0.03	0.04	-0.19	0.21	-0.08	60.12	49.73*	59.28	70.23	65.48	65.46	56.36	74.63	69.42	65.44	74.72	66.2	69.7	71.77	91.08	93.18	65.77	66.61	89.92	-0.14		-0.5	-0.92	-0.65	-0.18	0.73	-2.41*	0.28	-1.24	4.88*
42	-0.24	-0.22	-0.21	0.03	0.32	0.16	0.07	-0.21	-0.33		-0.38		-0.19	0.07	0.11	0.02		0.22	-0.08	65.61	60.49	66.22	68.91	70.38	71.6	65.8	90.76	77.49	71.6	86.15	70.68	77.53	85	110.25	107.42	72.89	75.1	100.44	1.25		0.64	0.22	-0.75	0.42	0.39	-2.39*	-0.71	-1.28	-0.42
44	-0.31	-0.13	-0.29	0.06	0.35	0.19	0.4	-0.16	-0.18	-0.3	-0.47	-0.18	0.07	0.3	0.48	0.28	-0.96	0.19	0.05	70.13	65.29	68.01	74.76	78.04	72.76	71.45	99.13	81.13	77.76	93.53	78.55	85.44	91.87	120.17	115.17	78.59	84.43	111.14	-0.94	-0.32	-0.67	-1.08	-0.07	0.21	5.19*	-2.63*	5.03*	-0.31	3.23
46	-0.25	-0.09	0.17	0.36	0.72	0.62	0.69	0.08	0.1		-0.35	0.14	0.17	0.63	0.38	0.39		0.58	0.3	75.7	71.93	74.16	77.99	83.51	71.3	75.96	112.05	85.7	83.42	105.52	82.22	94.42	102.36	132.78	127.41	81	89.09	121.27	-0.27	-0.09	0.66	-1.39	-0.19	0.99	2.72	-2.89*	0.62	-0.5	2.23
48	0.09	0.3	0.53	0.85	1.04	0.75	1.17	0.22			-0.22	0.21	0.5	0.84		0.89		0.76	0.69	83.83	76.35	75.16	84.32	85.66	81.5	82.12	124.85	86.69	89.26	112.29	85.61	100.78	111.21	144.69	136.76	85.7	93.19	131.38	1.15	0.58	-0.09	-1.22	-0.23	0.49	2.69	-2.65*	0.2	-0.35	12.43*
50	0.61	0.67	1.08	1.53	1.37	1.56	1.96	0.6	1.15		0.78		0.93	2.06		1.57	0.47	1.49	1.35	83.44	78	74.71	82.67	90.87	85.67	84.43	131.96	89.27	91.33	118.07	84.91	105.98	117.3	148.44	142.55	86.34	99.28	136.85	-0.07	-0.68	0.46	-1.77	0.79	3.13	0.36	-5.42*	0.8	-0.61	-0.36
52	1.92	1.66	2.13	2.42	2.01	2.28	3.35	1.34		1.23	1.13	1.66	1.86	3.67	2.53	2.48	1.29	2.11	2.11	84.33	78.51	78.39	85.08	91.36	82.11	91.41	141.42	89.45	92.71	123.51	89.13	110.85	121.44	154.84	142.85	85.35	102.47	143.75	1.04		1.39		1.12	2.23	0.47	-4.62*	4.57	-1.53	12.47*
54	2.84	2.67	4.03	3.55	2.59	3.23	4.51	2.17	2.65		2.27		2.36	4.79	3.84	3.4	1.86	3.24	3.54	93.03	82.24	79.69	86.44	95.4	90.61	96.03	149.81	88.16	99.05	130.55	90.97	119.09	129.31	162.78	154.5	88.37	107.19	152.49	0.29	-0.05	7.54*	0.25	1.34	2.22	0.92	-3.94*	27.77*	-0.74	0.9*
56	4.77	3.85	5.43	5.41	3.85	4.37	6.41	3.85	3.92		3.07	3.81	4.69	7.58	6.06	5.39	3.17	4.48	5.37	93.13	84.13	82.59	90.01	90.85	69.6*	94.44	154.86	92.76	101.87	140.19	91.21	124.27	134.34	170.71	158.99	91.94	109.94	158.22	1.83		1.86	-0.84	1.18	1.64	1.61	-2.44*	3.64	1.1	0.42
58	7.35	5.25	7.49	6.66	4.98	5.69	10.21	5.57	5.75		5.22	7.03	4.92	10.21	8.3	6.86	5.11	5.89	7.1	97.46	87.48	81.03	90.84	98.43	92.55	97.15	164.06	92.67	104.13	144.95	94.7	126.26	132.38	173.64	162.88	92.41	113.08	159.72	0.57		2.34	0.38	2.29	4.24	-0.29	-1.96	2.98	-2	1.39
60	10.16	6.8	9.67	9.8	7.89	7.26	11.65	6.28	7.34		7.36	8.65	8.25	15.4*	11.07	9.05	6.89	7.31	9.13	99	88.23	83.84	88.61	98.56	93.82	105.07	166.83	95.62	106.65	145.5	95.44	132.49	143.42	175.54	165.05	92.73	116.19	167.79	-1.04		-0.13	-0.39	1.16	4.87	6.61	-1.4	15.1*	-4.4*	0.77
62	11.96	11.5	13.38	12.35	8.99	8.97	14.72	9.33	9.06		9.98	11.66		16.24	13.74	11.94	8.2	10.61	12.1	96.59	86.79	78.03	94.57	95.29	80.66	108.16	164.56	93.44	108.45	142.97	94.52	133.35	143.04	177.64	163.88	91.24	118.39	166.17	0.41		1.16	-0.26	2.5	3.72	2.36	1.61	7.2	-2.88	1.3
64	15.8	13.46	15.91	14.76	11.07	10.91	18.1	12.47	11.82	14.03	12.15	14.24	13.38	20.14	17.32	13.09	11.18	12.78	13.84	96.73	84.84	74.5	84.94	96.57	88.78	107.2	165.27	91.34	108.32	141.5	86.93	129.38	140.28	174.03	164.8	88.85	115.67	167.45	1.28		3.53		3.63	5.73	0.23	0.83	6.47	0.42	4.54
66	19.71	15.26	19.56	17.69	16.14	15.36	22.9	14.09	15.55	17.37	16.16	17.48	16.54	25.98*	22.65	17.56	13.19	17.53	21.55	95.46	87.53	83.05	91.93	98.85	91.63	106.78	167.28	92.94	112.29	151.6	94.75	136.29	144.66	175.31	165.89	91.46	119.89	163.43	1.69	4.19	3.99	3.89	6.4	7.05	3.42	1.75	8.1	0.62	6.07
68	28.04	20.21	27.37	23.1	21.68	19.68	32.66*	22.5	20.13	24.79	25.07	24.57	22.33	36.55*	27.12	21.73	21.5	24.43	26.97	97.46	88.73	83.32	89.73	97.26	90.15	112.17	169.65	93.71	111.97	151.01	93.21	137.84	140.24	179.51	162.65	82.26	119.97	170.51	4.23	6.16	11.42	2.56	6.52	8.28	4.68	3.05	9.24	2.78	7.93
70	32.64	23.42	29.93	25.88	22.06	24.5	35.93*	25.66	26.13	30.8*	29.29	30.37	28.09	42.63*	31.25	25.33	26.35	28.67	30.33	97.94	86.77	78.58	91.99	98.91	90.24	114.39	161.75	93.59	115.81	152.59	95.56	139.16	143.5	179.38	167.97	92.16	123.22	166.08	12.55	7.59	5.37	4.04	8.83	10.91	5.3	4.54	11	2.35	12.81
72	34.76	25.78	31.94	28.94	25.11	24.18	41.62*	29.86	27.69	37.26*	32.35	31.65	30.68	49.16*	32.75	29.69	28.28	30.91	32.45	98.17	80.98	76.38	94.63	99.95	91.66	114.4	175.23	92.54	115.35	157.11	94.72	141.74	144.02	181.49	171.2	89.66	124.64	176.19	11.21	8.84	9.13	6.99	9.77	13.94	7.95	5.05	31.02*	6.22	31.33*
74	37.99	29.5	36	32.6	26.93	28.36	44.11*	34.18	30.69	43.54*	36.66	34.51	36.66	55.56*	38.49	30.39	32.75	35.45	34.24	98.96	84.97	82.28	92.91	91.59	91.17	111.61	168.25	92.66	115.69	155.84	89.56	142.66	142.53	179.15	171.11	91.63	125.45	170.6	14.15	9.51	9.46	6.64	13.2	12.44	10.12	6.37	13.41	10.57	10.82
76	44.01	32.6	38.37	35.97	30.04	30.26	50.04*	36.89	34.12	47.67*	39.89	38.26	38.68	59.85*	39.19	38.02	35.63	38.76	39.8	97.84	80.6	82.38	91.98	91.85	91.38	113.81	174.05	92.66	117.11	153.02	98.52	140.74	148.44	181.33	169.59	90.11	128.47	172.44	16.72	10.23	8.74	7.6	12.41	16.52	11.94	8.39	14.99	12.45	29.2*
78	45.15	37.51	40.6	39.34	32.47	34.65	54.88*	41.25	36.36	49.46*	42.54	41.72	39.38	65.56*	43.55	39.48	36.15	42.3	41.46	101.2	86.65	81.04	91.46	97.51	88.61	110.76	171.51	86.76	118.36	156.91	101.74	142.51	142.42	179.08	168.7	89.33	131.11	169.18	18.33	10.58	15.46	7.91	14.86	16.67	12.33	8.01	18.22	10.63	29.16*
80	47.78	38.77	41.16	40.4	35.3	36.84	56.36*	44.53	39.74	56.32*	45.52	42.18	41.41	70.38*	42.83	40.51	37.69	46.78	44.11	102.32	85.68	81.88	91.52	99.35	91.75	104.94	171.73	92.82	119.63	157.75	108.15	141.35	146.14	179.64	167.97	84.81	133.24	172.39	18.39	17.21	12.65	10.45	15.54	17.22	14.5	12.41	22.11	11.4	20.33
82	51.14	42.17	44.41	45.13	36.57	39.21	60.96*	48.84	43.61	61.45*	49.29	46.79	44.94	76.73*	50.37	43.94	42.87	52.06	44.86	97.91	84.51	81.39	93.1	97.59	87.96	115.84	171.29	92.42	138.55	142.75	103.12	140.75	143.91	178.35	167.35	89.8	134.79	169.88	22.89	17.28	15.52	13.7	16.15	19.03	18.54	8.63	20.92	10.62	21.06
84	53.09	43.61	46.39	45.97	39.89	41.11	66.46*	51.26	43.42	59.87*	50.76	49.06	47.31	82.37*	50.79	44.77	44.44	55.09	45.11	98.29	84.35	73.33	93.54	93.69	88.49	111.16	165.82	89.25	118.73	152.88	105.82	143.29	144.88	176.28	166	87.38	135.96	169.83	20.31	19.47	15.07	9.7	17.34	21.29	15.49	9	22.08	10.8	23.31
86	55.52	44.5	46.77	48.63	41.81	43.9	66.27*	54.18	46.73	66.06*	54.54	50.46	49.48	86.97*	49.97	49.01	46.41	58.32	51.96	101.09	85.48	81.38	94.93	95.54	91.22	121.58	170.46	88.32	119.94	153.97	108.27	142.19	146.3	172.18	167.81	87.29	138.15	171.38	25.13	16.69	20.35	12.06	20.79	23.03	15.29	11.12	27.96	12.98	26.33
88	54.81	45.89	48.29	49.98	42.24	45.65	70.24*	56.22	48.68	71.14*	56.51	50.49	51.62	92.64*	53.88	48.3	49.42	59.73	51.85	97.6	83.39	79.57	91.78	94.13	84.81	115.76	165.16	87.02	119.75	144.74	106.21	142.89	142.49	177.16	167.57	87.65	139.67	164.34	24.95	19.1	17.37	13.47	20.43	25.88	18.04	12.83	33.29*	12.06	32.49*
90	56.83	47.96	50.11	50.84	44.98	46.12	70.03*	57.82	50.28	74.51*	58.89	52.31	51.54	93.34*	54.88	52.23	50.54	62.96	54.41	101.71	84.23	79.64	93.49	97.74	89.43	106.22	169.51	88.92	121.84	152.81	104.83	141.92	143.33	174.18	165.87	87.61	138.97	172.19	25.75	21.51	21.85	13.95	24.13	27.05	22.21		36.8*	22.41	27.51
92	59.53	49.74	52.27	52.53	46.35	50.09	72.18*	61.04	52.25	80.95*	58.84	54.34	56.13	100.21*	56.75	52.24	52.57	67.96	56.62	94.76	82.89	77.89	93.2	96.74	86.97	99.08	167.29	86.26	120.21	150.31	112.93	135.57	135.8	175.06	165.67	87.8	140.45	168.41	25.36	23.39	21.12	13.83	26.71	31.75	25.65		30.59*	21.04	43.18*
94	57.85	51.54	51.73	51.71	47.1	50.28	72.48*	61.33	54.81	81.01*	62.02	54.74	55.38	102.98*	58.45	52.77	53.07	68.86	58.1	96.75	80.4	78.35	94.18	95.32	85.26	103.95	166.23	84.55	118.99	148.97	111.69	140.65	139.59	171.42	164.57	81.61	139.38	168.33	27.61	24.17	21.86	15.8	22.33	26.11	19.22		43.52*	22.25	33
96	58.29	51.12	52.73	54	46.05	50.02	73.15*	63.34	52.66	82.34*	65.23	54.69	57.18	101.86*	56.11	50.67	54.76	70.1	59.14	96.56	82.92	76.88	96.49	94.87	87.67	103.89	163.45	86.92	119.18	129.79	111.06	140.81	134.24	175.06	164.53	86.98	142.67	163.44	29.75	21.35	21.76	24.36	25.46	32.69	23.61		28.25	26.73	35.06
98	61.6	55.08	55.33	55.5	46.99	51.69	74.64*	65.45	55.38	86.79*	66.22	56.75	59.84	104.88*	56.06	55.38	56.65	73.32	60.48	92.34	82.31	78.62	89.07	95.4	80.69	104.81	166.97	83.46	118.46	150.05	107.82	142.12	133.61	170.89	161.43	81.87	139.01	166.01	29.04	25.08	22.09	18.79	26.08	37.44	25.32		34.02*	25.9	33.38
100
102
104
	Rows highlighted in green represent the linear part of the reaction, and were used to calculate initial reaction rates.
[truncated: 26 more columns]

## Sheet: Figure2A_linear-regresison
	100 nM mCherry-VPS34-CII WT	100 nM mCherry-VPS34-CII VPS15 mutant	100 nM mCherry-VPS34-CII WT + RAB5A	100 nM mCherry-VPS34-CII VPS15 mutant + RAB5A
Best-fit values
Slope	0.6812	0.5724	5.457	2.045
Y-intercept	-40.12	-42.57	-145.9	-116.5
X-intercept	58.9	74.36	26.73	56.96
1/slope	1.468	1.747	0.1832	0.4891
Std. Error
Slope	0.02946	0.05348	0.3695	0.1617
Y-intercept	2.277	4.207	12.96	11.14
95% Confidence Intervals
Slope	0.6231 to 0.7392	0.4666 to 0.6782	4.721 to 6.193	1.722 to 2.367
Y-intercept	-44.61 to -35.64	-50.89 to -34.24	-171.7 to -120.0	-138.7 to -94.21
X-intercept	57.09 to 60.46	72.95 to 75.48	25.40 to 27.75	54.69 to 58.62
Goodness of Fit
R squared	0.7038	0.4743	0.7467	0.711
Sy.x	3.532	3.176	7.203	2.973
Is slope significantly non-zero?
F	534.6	114.6	218.1	159.9
DFn, DFd	1, 225	1, 127	1, 74	1, 65
P value	<0.0001	<0.0001	<0.0001	<0.0001
Deviation from zero?	Significant	Significant	Significant	Significant
Equation	Y = 0.6812*X - 40.12	Y = 0.5724*X - 42.57	Y = 5.457*X - 145.9	Y = 2.045*X - 116.5
Data
Number of X values	2300	2200	5120	9472
Maximum number of Y replicates	19	19	19	19
Total number of values	227	129	76	67
Number of missing values	2073	2071	5044	9405

## Sheet: Figure2A_one-wayANOVA
One-way ANOVA
Column A = 100 nM mCherry-VPS34-CII WT
Column D = 100 nM mCherry-VPS34-CII VPS15 mutant
Column E = 100 nM mCherry-VPS34-CII WT + RAB5A
Column H = 100 nM mCherry-VPS34-CII VPS15 mutant + RAB5A
Number of families	1
Number of comparisons per family	6
Alpha	0.05
Tukey's multiple comparisons test	Mean Diff.	95.00% CI of diff.	Below threshold?	Summary	Adjusted P Value
Column A vs. Column D	0.1088	-0.08120 to 0.2988	No	ns	0.4381	A-D
Column A vs. Column E	-4.776	-4.961 to -4.591	Yes	****	<0.0001	A-E
Column A vs. Column H	-1.364	-1.551 to -1.176	Yes	****	<0.0001	A-H
Column D vs. Column E	-4.885	-5.070 to -4.700	Yes	****	<0.0001	D-E
Column D vs. Column H	-1.473	-1.660 to -1.285	Yes	****	<0.0001	D-H
Column E vs. Column H	3.412	3.230 to 3.594	Yes	****	<0.0001	E-H
Test details	Mean 1	Mean 2	Mean Diff.	SE of diff.	n1	n2	q	DF
Column A vs. Column D	0.6812	0.5724	0.1088	0.07211	17	17	2.134	67
Column A vs. Column E	0.6812	5.457	-4.776	0.07019	17	19	96.22	67
Column A vs. Column H	0.6812	2.045	-1.364	0.07111	17	18	27.12	67
Column D vs. Column E	0.5724	5.457	-4.885	0.07019	17	19	98.42	67
Column D vs. Column H	0.5724	2.045	-1.473	0.07111	17	18	29.29	67
Column E vs. Column H	5.457	2.045	3.412	0.06915	19	18	69.78	67
Compact letter display
Column E	A
Column H	B
Column A	C
Column D	C

## Sheet: Fig2B-Raw(CII-DDMIE+RAB5A)
Sample	mCherry channel intensity	AF488 channel intensity	AF488 channel background	averaged AF488 channel background	corrected AF488 channel intensity	AF488 channel intensity normalised by mCherry channel intensity
CII SHMIT>DDMIE	82.32	0	0	0	0	0
0 µM RAB5A	66.275	0	0		0	0
	40.75	0	0		0	0
	125.051	0	0		0	0
	43.311	0	0		0	0
	37.395	0	0		0	0
	41.016	0	0		0	0
	42.841	0	0		0	0
	39.068	0	0		0	0
	40.004	0	0		0	0
	41.667	0			0	0
	46.105	0			0	0
	75.851	0			0	0
CII SHMIT>DDMIE	86.774	13.59	3.759	3.6821	9.9079	0.114181
1 µM RAB5A	93.464	14.381	3.669		10.6989	0.114471
	71.87	12.188	3.7		8.5059	0.118351
	93.744	14.231	3.693		10.5489	0.112529
	60.26	10.432	3.73		6.7499	0.112013
	41.107	8.734	3.735		5.0519	0.122896
	42.818	8.837	3.638		5.1549	0.120391
	31.015	7.563	3.518		3.8809	0.12513
	80.382	13.74	3.572		10.0579	0.125126
			3.807
CII SHMIT>DDMIE	119.218	24.905	6.116	6.0829	18.789	0.157602
4 µM RAB5A	83.172	19.21	6.085		13.094	0.157433
	108.198	23.112	6.186		16.996	0.157082
	81.096	19.184	6.206		13.068	0.161142
	70.314	17.616	6.131		11.5	0.163552
	50.552	13.882	6.108		7.766	0.153624
	64.724	16.32	5.822		10.204	0.157654
	72.914	17.963	5.969		11.847	0.162479
	69.306	14.967	6.026		8.851	0.127709
	70.81	16.086	6.18		9.97	0.140799
	58.944	15.68			9.564	0.162256
	42.279	12.713			6.597	0.156035
	39.214	12.665			6.549	0.167007
	66.185	15.425			9.309	0.140651
	44.132	12.448			6.332	0.143479
	27.235	10.608			4.492	0.164935
	43.99	12.284			6.168	0.140214
CII SHMIT>DDMIE	79.478	46.482	21.069	20.5307	25.9513	0.326522
8 µM RAB5A	58.269	38.544	20.522		18.0133	0.30914
	55.124	36.435	19.949		15.9043	0.288519
	39.766	33.475	20.975		12.9443	0.325512
	43.825	35.901	20.022		15.3703	0.35072
	44.168	34.798	20.703		14.2673	0.323023
	52.042	38.384	20.275		17.8533	0.343056
	37.505	33.212	20.123		12.6813	0.338123
	41.097	34.709	20.988		14.1783	0.344996
	33.535	30.541	20.681		10.0103	0.298503
	60.971	43.23			22.6993	0.372297
	60.824	42.3			21.7693	0.357906
	73.978	45.806			25.2753	0.34166
	95.559	51.975			31.4443	0.329056
CII SHMIT>DDMIE	97.942	93.104	46.488	46.2261	46.8779	0.478629
14 µM RAB5A	89.259	88.657	46.623		42.4309	0.475368
	221.079	148.026	46.601		101.8	0.460468
	73.518	81.234	46.337		35.0079	0.476181
	46.92	67.628	46.544		21.4019	0.456136
	71.14	75.686	45.818		29.4599	0.414112
	65.975	78.721	45.522		32.4949	0.492534
	35.449	64.267	47.441		18.0409	0.508925
	39.277	60.886	47.123		14.6599	0.373244
	36.527	58.962	43.764		12.7359	0.348671
	87.628	81.617			35.3909	0.403877
	39.213	59.048			12.8219	0.326981
	40.24	65.095			18.8689	0.468909
	21.293	56.458			10.2319	0.480529
	25.549	59.017			12.7909	0.500642
CII SHMIT>DDMIE	140.102	126.367	64.583	64.2736	62.0934	0.443201
20 µM RAB5A	86.785	98.046	65.15		33.7724	0.38915
	94.767	109.681	64.902		45.4074	0.479148
	50.133	89.066	64.038		24.7924	0.494533
	33.311	76.859	65.107		12.5854	0.377815
	42.094	77.371	63.905		13.0974	0.311146
	29.171	76.275	63.098		12.0014	0.411415
	27.585	75.622	64.083		11.3484	0.411397
	33.098	75.321	63.071		11.0474	0.333778
	34	75.94	64.799		11.6664	0.343129
	79.02	99.205			34.9314	0.442058
	28.946	76.977			12.7034	0.438865
	24.888	73.366			9.0924	0.365333
	31.537	75.783			11.5094	0.364949
	42.05	82.277			18.0034	0.428143
	31.292	78.454			14.1804	0.453164
	41.688	78.197			13.9234	0.333991
	51.317	79.899			15.6254	0.304488
	214.951	167.11			102.836	0.478418
CII SHMIT>DDMIE	79.328	131.738	99.186	98.8722	32.8658	0.414303
20 µM RAB5A	103.849	153.758	100.399		54.8858	0.528515
	78.859	135.48	99.957		36.6078	0.464218
	64.09	125.976	98.162		27.1038	0.422902
	55.365	119.476	99.484		20.6038	0.372145
	42.889	115.554	99.763		16.6818	0.388953
	42.075	111.915	98.923		13.0428	0.309989
	50.254	118.343	97.271		19.4708	0.387448
	62.71	123.636	97.332		24.7638	0.394894
	45.267	112.919	98.245		14.0468	0.31031
	63.373	123.488			24.6158	0.388427
	68.219	124.478			25.6058	0.375347
	55.538	117.326			18.4538	0.332273
	47.183	117.037			18.1648	0.384986
	74.337	129.826			30.9538	0.416398
	56.778	123.668			24.7958	0.436715
	90.313	141.808			42.9358	0.475411

## Sheet: Fig2B-Analysis(CII-DDMIE+RAB5A)
	Raw data for non-linear fit (one site-specific binding)
	µM RAB5A-AF488
	1	0.114181	0.114471	0.118351	0.112529	0.112013	0.122896	0.120391	0.12513	0.125126
	4	0.157602	0.157433	0.157082	0.161142	0.163552	0.153624	0.157654	0.162479	0.127709	0.140799	0.162256	0.156035	0.167007	0.140651	0.143479	0.164935	0.140214
	8	0.326522	0.30914	0.288519	0.325512	0.35072	0.323023	0.343056	0.338123	0.344996	0.298503	0.372297	0.357906	0.34166	0.329056
	14	0.478629	0.475368	0.460468	0.476181	0.456136	0.414112	0.492534	0.508926	0.37324388*	0.34867085*	0.403877	0.32698085*	0.468909	0.480529	0.500642
	20	0.443201	0.38915	0.479148	0.49453254*	0.377815	0.31114648*	0.411415	0.411397	0.333778	0.343129	0.442058	0.438865	0.365333	0.364949	0.428143	0.453164	0.333991	0.30448779*	0.478418
	30	0.414303	0.52851544*	0.46421842*	0.422902	0.372145	0.388953	0.3099893*	0.387448	0.394894	0.310309939*	0.388427	0.375347	0.3322734*	0.384986	0.416398	0.436715	0.47541107*
	One site -- Specific binding
	Best-fit values
	Bmax	0.5405
	Kd	6.038	Normalize in Prism with these settings:			Subcolumns: Average the subcolumns, and normalize the means
	95% CI (profile likelihood)					How is 0% defined?: Smallest mean in each data set
	Bmax	0.4966 to 0.5916				How is 100% defined? : Y = 0.5405 becomes 100% for all data sets
	Kd	4.616 to 7.847				Present results as: percentages
	Goodness of Fit
	Degrees of Freedom	82
	R squared	0.8468
	Sum of Squares	0.277
	Sy.x	0.05812
	Number of points
	# of X values	350
	# Y values analyzed	84
	Normalized data for non-linear fit (one site-specific binding)
	µM RAB5A-AF488
	1	0.114181	0.114471	0.118351	0.112529	0.112013	0.122896	0.120391	0.12513	0.125126
	4	0.157602	0.157433	0.157082	0.161142	0.163552	0.153624	0.157654	0.162479	0.127709	0.140799	0.162256	0.156035	0.167007	0.140651	0.143479	0.164935	0.140214
	8	0.326522	0.30914	0.288519	0.325512	0.35072	0.323023	0.343056	0.338123	0.344996	0.298503	0.372297	0.357906	0.34166	0.329056
	14	0.478629	0.475368	0.460468	0.476181	0.456136	0.414112	0.492534	0.508926	0.37324388*	0.34867085*	0.403877	0.32698085*	0.468909	0.480529	0.500642
	20	0.443201	0.38915	0.479148	0.49453254*	0.377815	0.31114648*	0.411415	0.411397	0.333778	0.343129	0.442058	0.438865	0.365333	0.364949	0.428143	0.453164	0.333991	0.30448779*	0.478418
	30	0.414303	0.52851544*	0.46421842*	0.422902	0.372145	0.388953	0.3099893*	0.387448	0.394894	0.310309939*	0.388427	0.375347	0.3322734*	0.384986	0.416398	0.436715	0.47541107*
	One site -- Specific binding			In nonlinear regression parameters, select Range > Maximum X value > end curve at 50 µM
	Best-fit values
	Bmax	100
	Kd	6.038
	95% CI (profile likelihood)
	Bmax	91.87 to 109.5
	Kd	4.616 to 7.847
	Goodness of Fit
	Degrees of Freedom	82
	R squared	0.8468
	Sum of Squares	9483
	Sy.x	10.75
	Number of points
	# of X values	350
	# Y values analyzed	84

## Sheet: Figure2C_curves
Time, min	100 nM mCherry-VPS34-CII VPS34 mut. + VPS15 mut.																			100 nM mCherry-VPS34-CII WT + RAB5A																			100 nM mCherry-VPS34-CII WT
0	0.04	0.07	0.03	0.03	0.02	0.08	0.13	0.03	0.02	0.05	0.07	0.03	0.04*	0.01	0.02	0.04	0.12	0.38	0.11	0.02	0.04	0.01	0.04	0.07	0.01	0.09	0.05	0.02	0.05	0.04	0.04	0.04	0.02	0.03	0.03	0.02	0.05	0.03	0.02	0.02	0.08	0.08	0.04	0.04	0.07	0.32	0.05	0.05	0.04
2	0.03	0.03	0.02	0.02	0.01	0.09	0.13	0.03	0.02	0.07	0.05	0.02	0.05*	0.02	0.02	0.04	0.12	0.37	0.05	0.02	0.03	0.04	0.03	0.03	0.03	0.09	0.04	0.03	0.04	0.03	0.03	0.06	0.02	0.04	0.04	0.04	0.05	0	0.02		0.06	0.05	0.06	0.07	0.07	0.32	0.03	0.05	0.05
4	0.03	0.13	0.05	0.03	0.04	0.09	0.16	0.02	0.03	0.05	0.07	0.03	0.03*	0.02	0.03	0.01	0.15	0.42	0.06	0.03	0.04	0.03	0.07	0.04	0.02	0.06	0.05	0.02	0.03	0.03	0.04	0.06	0.02	0.02	0.04	0.04	0.07	0.02	0.02	0.01	0.08	0.06	0.06	0.06	0.06	0.44	0.06	0.07	0.03
6	0.02	0.03	0.02	0.02	0.01	0.09	0.12	0.02	0.03	0.06	0.05	0.06	0.04*	0.03	0.02	0.03	0.1	0.39	0	0.04	0.03	0.05	0.07	0.08	0.03	0.05	0.06	0.05	0.03	0.04	0.06	0.07	0.02	0.05	0.04	0.02	0.04	0.02	0.03	0.02	0.1	0.05	0.04	0.06	0.1	0.38	0.04	0.06	0.05
8	0.03	0.04	0.03	0.03	0.02	0.11	0.1	0.03	0.04	0.08	0.06	0.05	0.06*	0.02	0.03	0.05	0.09	0.45		0.05	0.03	0.02	0.06	0.04	0.02	0.05	0.06	0.04	0.05	0.03	0.04	0.04	0.03	0.04	0.04	0.03	0.04	0.03	0.03	0.01	0.11	0.02	0.05	0.07	0.13	0.46	0.06	0.07	0.06
10	0.05	0.07	0.04	0.03	0.01	0.18	0.19	0.04	0.07	0.08	0.05	0.06	0.07*	0.04	0.05	0.07	0.06	0.36	0.5	0.03	0.05	0.04	0.03	0.06	0.02	0.08	0.05	0.04	0.05	0.04	0.04	0.05	0.02	0.04	0.03	0.05	0.04	0.02	0.02		0.14	0.06	0.07	0.06	0.09	0.46	0.08	0.07	0.07
12	0.06	-0.01	0.03	0.03	0.01	0.25	0.19	0.04	0.02	0.23	0.1	0.06	0.07*	0.03	0.02	0.07	0.06	0.4	0.03	0.04	0.02	0.05	0.07	0.03	0.02	0.07	0.06	0.04	0.04	0.03	0.04	0.04	0.02	0.04	0.05	0.03	0.05	0.01	0.01	0.03	0.09	0.03	0.05	0.05	0.1	0.39	0.09	0.08	0.06
14	0.06	0.1	0.07	0.04	0.02	0.28	0.18	0.06	0.05	0.17	0.12	0.12	0.09*	0.02	0.04	0.06	0.09	0.5	0.11	0.02	0.02	0.03	0.03	0.03	0.03	0.09	0.07	0.05	0.06	0.05	0.05	0.06	0.02	0.1	0.05	0.03	0.03	0.04	0.03		0.1	0.06	0.07	0.08	0.12	0.37	0.06	0.08	0.08
16	0.06	0.02	0.02	0.04	0.03	0.56	0.16	0.04	0.04	0.23	0.06	0.1	0.09*	0.01	0.03	0.08	0.09	0.45	0.08	-0.01	0.01	-0.01	0.02	0.04	0.05	0.08	0.05	0	0.05	0.03	0.04	0.06	0.01	0.08	0.06	-0.03	0.02	0.06	0.05	0.04	0.1	0.06	0.09	0.08	0.04	0.19	0.1	0.11	0.11
18	0.08	0.05	0.03	0.06	0.03	0.7	0.25	0.09	0.2	0.28	0.09	0.12	0.15*	0.02	0.03	0.27	0.14	0.49	0.09	-0.18	-0.11	-0.25	-0.2	-0.24	0.13	0.03	0.03	0	-0.03	-0.09	-0.11	-0.01	-0.05	0.06	-0.07	-0.15	0.04	0.1	0.05	0.04	0.29	0.09	0.13	0.17	0.12	-0.14	0.14	0.08	0.12
20	0.16	0.11	-0.02	0.01	0.04	1.2	0.26	0.05	0.6	0.39	0.04	0.02	0.18*	-0.04	-0.01	0.14	0.05	0.58	-0.13	-0.23	-0.26	-0.42	-0.33	-0.37	0.17	0.17	0.11	0.01	0.03	-0.08	-0.14	-0.1	0.02	0.17	-0.09	-0.28	-0.05	0.28	0.05	0.01	0.11	0.12	0.07	0.12	0.09	-0.22	0.18	0.12	0.14
22	-0.01	-0.02	-0.17	-0.08	-0.1	0.9	0.16	0.15	0.72	0.41	-0.09	-0.07	0.12*	-0.21	-0.03	0.1	0.09	0.59	-0.17	0	0.08	-0.38	-0.17	-0.01	1.27	0.77	0.62	0.96	0.96	0.49	0.61	0.68	0.51	0.89	0.44	0.14	0.68	1.52	0.02		0.26	0.18	0.16	0.21	1.07	-0.42	0.19	0.26	1.91
24	0.17	-0.46	-0.06	-0.25	-0.18	3.35*	0.14	-0.12	-0.05	0.46	-0.23	-0.17	0*	-0.44	-0.12	0	-0.14	0.26	-0.49	1.15	1.46	0.6	1.36	2.06	4.06	2.1	2.14	3.08	3.37	2.87	3.22	2.86	2.41	2.83	1.93	1.88	2.84	4.39	0.01	-0.03	0.28	0.07	0.06	0.21	1.03	-0.77	0.4	0.05	0.15
26	-0.23	-0.14	-0.4	-0.39	-0.37	-0.11	0.14	-0.28	-0.19	-0.13	-0.31	-0.39	0.05*	0	-0.38	-0.16	-0.03	0.16	-0.75	3.7	4.29	2.67	4.05	5.93	7.58	5.06	4.87	6.69	6.83	6.58	5.94	6.71	5.43	6.15	5.71	5.46	5.7	8.71	0.05	-0.1	0.06	0	0.1	0.06	1.31	-1.07	0.29	-0.19	0.19
28	-0.57	-0.43	-0.82	-0.63	-0.55	0.95	0.12	-0.47	-0.48	0.17	-0.49	-0.53	0*	-0.79	-0.67	-0.64	-0.44	-0.14	-1.07	7.82	8.41	7.74	9.81	11.24	17.39	8.31	10.02	13.56	15.11	12.88	13.58	11.92	10.51	13.13	12.27	13	10.23	16.32	-0.2	0.27	-0.03	0.05	-0.21	-0.1	0.66	-1.11	0.23	-0.21	0.8
30	-0.26	-0.48	-0.95	-0.59	-0.87	1.74*	-0.42	-0.61	-0.66	-0.14	-0.74	-0.85	0.05*	-0.9	-0.66	-0.7	-0.27	-0.24	-0.25	16.81	15.75	18.12	19.18	19.47	26.43	15.92	18.45	23.59	23.84	22.39	22.34	18.93	19.19	23.42	24.39	23.47	20.69	26.52	-0.36	-0.5	-0.06	-0.29	-0.26	-0.19	0.03	-1.27	0.24	-0.49	-0.21
32	-0.1	-0.38	-1.18	-0.62	-0.98	-0.36	-0.66	-0.59	0.7	0.54	-0.49	-1.12	-0.04*	-0.72	-0.85	-0.81	-0.63	-0.3	-1.2	22.68	21.55	22.17	26.22	25.48	30.97	22.96	25.49	30.45	31.63	29.83	30.04	25.87	26.49	30.5	34.95	32.44	25.95	35.81	-0.52	-0.56	-0.39	-0.28	-0.15	-0.32	0.7	-1.47	0.08	0.15	-0.1
34	-0.51	-0.98	-1.45	-0.99	-1.1	-0.58	-0.6	-0.31	0.27	1.4*	-1.21	-1.19	-0.47*	-1.02	-1.07	-0.38	-0.73	-0.39	0	31.15	29.86	32.35	38.44	37.52	41.37	34.52	36.87	42.63	40.48	40.06	43.32	35.31	37.76	45.68	48.99	45.93	38.51	48.11	-0.82	-0.96	-0.44	-0.59	-0.32	-0.58	-0.03	-1.61	-0.31	-0.64	-0.41
36	0.09	-0.2	-1.8	-1.48	-1.64	19.55*	-0.79	-0.7	-1	0.21	-1.27	-1.86	0.19*	-1.25	-0.72	-1.43	-1.05	0.16	-0.08	45.69	42.89	46.28	49.36	50.34	54.23	45.87	54.13	55.94	53.96	55.17	55.12	51.28	52.93	67.88	69.14	55.48	43.05	67.96	-0.57	-1.27	-0.06	-0.53	-0.27	-0.58	-0.26	-1.25	1.11	-0.84	0.54
38	3.83*	-0.9	-1.38	-1.51	-1.77	-0.69	-0.03	-0.65	0.1	2.24*	-0.03	-1.93	0.1*	-1.39	-0.01	-1.26	-1.15	-0.26	0.7	52.79	48.06	49.1	54.54	56.94	54.88	51.61	62.45	61.22	59.26	63.11	59.31	57.41	60.45	78.27	79.59	58.66	48.46	77.33	-0.94	0.04	-0.59	-0.38	-0.62	-0.17	0.61	-1.64	-0.53	-0.71	0.11
40	4.62*	-0.72	-1.52	-1.23	-1.83	-0.14	-0.23	-0.53	-0.2	2.78*	-1.27	-1.65	0.39*		-0.8	-1.09	-0.91	0.72		60.12	49.73*	59.28	70.23	65.48	65.46	56.36	74.63	69.42	65.44	74.72	66.2	69.7	71.77	91.08	93.18	65.77	66.61	89.92	-0.14		-0.5	-0.92	-0.65	-0.18	0.73	-2.41*	0.28	-1.24	4.88*
42	-0.2	-0.73	-1.48	-0.84	-1.69	3.16*	0.54	-0.37	-0.28	0.96	-1.26	-2.1	1.14*	-1.09	-1.2	-1.08	-0.56	1.9	-0.12	65.61	60.49	66.22	68.91	70.38	71.6	65.8	90.76	77.49	71.6	86.15	70.68	77.53	85	110.25	107.42	72.89	75.1	100.44	1.25		0.64	0.22	-0.75	0.42	0.39	-2.39*	-0.71	-1.28	-0.42
44	7.87*	-0.92	-0.82	-1.56	-1.73	0.12	0.51	-0.16	2.81*	1.1	-0.87	-1.62	1.76*	-0.7	0.13	0.15	-0.84	0.96	1.44	70.13	65.29	68.01	74.76	78.04	72.76	71.45	99.13	81.13	77.76	93.53	78.55	85.44	91.87	120.17	115.17	78.59	84.43	111.14	-0.94	-0.32	-0.67	-1.08	-0.07	0.21	5.19*	-2.63*	5.03*	-0.31	3.23
46	3.32	-1.13	-1.21	-1.03	-2.11	9.03*	0.2	-0.03	0.58	1.85	-1.38	-2.08	2.53*	0.47	0.27	-0.81	-0.77	2.03	-4.2*	75.7	71.93	74.16	77.99	83.51	71.3	75.96	112.05	85.7	83.42	105.52	82.22	94.42	102.36	132.78	127.41	81	89.09	121.27	-0.27	-0.09	0.66	-1.39	-0.19	0.99	2.72	-2.89*	0.62	-0.5	2.23
48	-0.1	-0.45	-1.29	-1.49	-1.67	2.12	3.29	-0.33	1.74	3.3	1.32	-1.06	3.85*	0.24	-0.72	2.48	-1.36	5.17*	-3.65*	83.83	76.35	75.16	84.32	85.66	81.5	82.12	124.85	86.69	89.26	112.29	85.61	100.78	111.21	144.69	136.76	85.7	93.19	131.38	1.15	0.58	-0.09	-1.22	-0.23	0.49	2.69	-2.65*	0.2	-0.35	12.43*
50	-0.21	-0.5	-1.06	-0.52	-1.41	2.56	1.36	1.14		4.66	-0.85	-1.43	3.97*	0.48	0.63	2.9	0.3	6.27*		83.44	78	74.71	82.67	90.87	85.67	84.43	131.96	89.27	91.33	118.07	84.91	105.98	117.3	148.44	142.55	86.34	99.28	136.85	-0.07	-0.68	0.46	-1.77	0.79	3.13	0.36	-5.42*	0.8	-0.61	-0.36
52	2.05	0.28	-0.74	-0.79	-2.17	1.12	-0.51	0.23	1.99	4.82	0.21	-1.42	5.25*	0.22		0.36	0.52	9.75*		84.33	78.51	78.39	85.08	91.36	82.11	91.41	141.42	89.45	92.71	123.51	89.13	110.85	121.44	154.84	142.85	85.35	102.47	143.75	1.04		1.39		1.12	2.23	0.47	-4.62*	4.57	-1.53	12.47*
54	4.64	1.48	0.54	-0.41	-1.73	8.51*	0.37	0.95	2.97	3.63	1.07	-1.26	7.13*	1.33	3.93		-0.6	11.44*	1.71	93.03	82.24	79.69	86.44	95.4	90.61	96.03	149.81	88.16	99.05	130.55	90.97	119.09	129.31	162.78	154.5	88.37	107.19	152.49	0.29	-0.05	7.54*	0.25	1.34	2.22	0.92	-3.94*	27.77*	-0.74	0.9*
56	5.34	1.58	0.55	0.37	-0.95	3.14	2.83	1.5	5.35	1.84	0.21	0.31	8.96*	1.68	0.13	1.17	0.58	6.38	5.11	93.13	84.13	82.59	90.01	90.85	69.6*	94.44	154.86	92.76	101.87	140.19	91.21	124.27	134.34	170.71	158.99	91.94	109.94	158.22	1.83		1.86	-0.84	1.18	1.64	1.61	-2.44*	3.64	1.1	0.42
58	4.86	5.28	0.94	-0.38	-1.35	4.4	1.72	2.07	4.34	3.68	-0.07	0.61	8.04*	1.34	1.58	0.65	1.77	8.01	6.61	97.46	87.48	81.03	90.84	98.43	92.55	97.15	164.06	92.67	104.13	144.95	94.7	126.26	132.38	173.64	162.88	92.41	113.08	159.72	0.57		2.34	0.38	2.29	4.24	-0.29	-1.96	2.98	-2	1.39
60	3.59	8.17	0.86	0.97	-0.03	5.66	-1.82	2.95	5.67	4.05	-0.03	-1.4	7.45*	2.06	1.18	0.1	0.24	10.29*	6.23	99	88.23	83.84	88.61	98.56	93.82	105.07	166.83	95.62	106.65	145.5	95.44	132.49	143.42	175.54	165.05	92.73	116.19	167.79	-1.04		-0.13	-0.39	1.16	4.87	6.61	-1.4	15.1*	-4.4*	0.77
62	4.44	4.75	1.45	-1.02	-1.61	5.66	2.38	1.5	10.48	2.88	0.27	0.74	9.15*	3.43	0.6	1.85	0.33	19.63*	7.58	96.59	86.79	78.03	94.57	95.29	80.66	108.16	164.56	93.44	108.45	142.97	94.52	133.35	143.04	177.64	163.88	91.24	118.39	166.17	0.41		1.16	-0.26	2.5	3.72	2.36	1.61	7.2	-2.88	1.3
64	5.56	3.97	2.39	2.95	0.51	9.17	1.07	4.9	8.65	5.92	2.42	4.84	12.12*		4.07	4.41	1.92	16.64*	6.1	96.73	84.84	74.5	84.94	96.57	88.78	107.2	165.27	91.34	108.32	141.5	86.93	129.38	140.28	174.03	164.8	88.85	115.67	167.45	1.28		3.53		3.63	5.73	0.23	0.83	6.47	0.42	4.54
66	9.59	63.61*	4.1	2.88	3.32	16.41*	2.45	6.1	13.6	9.9	5.85	3.2	13.09*	3.34	11.26	2.05	2.54	15.98*	9.39	95.46	87.53	83.05	91.93	98.85	91.63	106.78	167.28	92.94	112.29	151.6	94.75	136.29	144.66	175.31	165.89	91.46	119.89	163.43	1.69	4.19	3.99	3.89	6.4	7.05	3.42	1.75	8.1	0.62	6.07
68	9.61	9.06	4.8	3.4	2.73	12.4	6.64	6.63	12.66	13.02	4.38	4.54	18.37*	7.69	3.93	5.68	3.66	19.68*	10.15	97.46	88.73	83.32	89.73	97.26	90.15	112.17	169.65	93.71	111.97	151.01	93.21	137.84	140.24	179.51	162.65	82.26	119.97	170.51	4.23	6.16	11.42	2.56	6.52	8.28	4.68	3.05	9.24	2.78	7.93
70	9.72	10.42	8.41	4.25	5.47	11.4	5.66	8.04	11.76	9.08	6.27	4.9	15.05*	7.78	8.95	12.29	5.14	22.19*	11.5	97.94	86.77	78.58	91.99	98.91	90.24	114.39	161.75	93.59	115.81	152.59	95.56	139.16	143.5	179.38	167.97	92.16	123.22	166.08	12.55	7.59	5.37	4.04	8.83	10.91	5.3	4.54	11	2.35	12.81
72	7.08	13.87	7.25	8.18	5.46	13.37	6.58	9.56	12.79	9.93	7.93	7.22	16.86*	8.48	7.95	8.84	5.47	26.93*	13.1	98.17	80.98	76.38	94.63	99.95	91.66	114.4	175.23	92.54	115.35	157.11	94.72	141.74	144.02	181.49	171.2	89.66	124.64	176.19	11.21	8.84	9.13	6.99	9.77	13.94	7.95	5.05	31.02*	6.22	31.33*
74	10.37	21.75*	7.46	6.43	5.24	17.38*	6.9	10.27	13.21	12.42	6.42	8.57	17.84*	10.1	7.81	9.73	4.79	28.68*	13.9	98.96	84.97	82.28	92.91	91.59	91.17	111.61	168.25	92.66	115.69	155.84	89.56	142.66	142.53	179.15	171.11	91.63	125.45	170.6	14.15	9.51	9.46	6.64	13.2	12.44	10.12	6.37	13.41	10.57	10.82
76	12.75	58.99*	8.66	8.64	6.03	16.12*	6.48	12.94	12.83	8.92	7.98	9.59	15.37*	8.01	7.85	11.74	5.74	26.82*	15.42	97.84	80.6	82.38	91.98	91.85	91.38	113.81	174.05	92.66	117.11	153.02	98.52	140.74	148.44	181.33	169.59	90.11	128.47	172.44	16.72	10.23	8.74	7.6	12.41	16.52	11.94	8.39	14.99	12.45	29.2*
78	11.54	13.8	10.09	11.8	7.6	20.29*	4.93	10.57	13.57	11.34	8.26	9.14	24.44*	11.36	9.24	14.79	7.45	28.5*	15.38	101.2	86.65	81.04	91.46	97.51	88.61	110.76	171.51	86.76	118.36	156.91	101.74	142.51	142.42	179.08	168.7	89.33	131.11	169.18	18.33	10.58	15.46	7.91	14.86	16.67	12.33	8.01	18.22	10.63	29.16*
80	15.94	14.41	10.15	9.97	7.96	23.07*	7.76	13.67	13.74	12.27	10.25	10.19	21.93*	12.98	12.65	13.82	7.42	29.34*	16.64	102.32	85.68	81.88	91.52	99.35	91.75	104.94	171.73	92.82	119.63	157.75	108.15	141.35	146.14	179.64	167.97	84.81	133.24	172.39	18.39	17.21	12.65	10.45	15.54	17.22	14.5	12.41	22.11	11.4	20.33
82	15.74	14.66	9.13	10.57	9.23	21.31*	8.51	13.62	16.5	9.86	10.81	11.5	20.98*	13.89	12.45	15.75	8.42	34.19*	18.67	97.91	84.51	81.39	93.1	97.59	87.96	115.84	171.29	92.42	138.55	142.75	103.12	140.75	143.91	178.35	167.35	89.8	134.79	169.88	22.89	17.28	15.52	13.7	16.15	19.03	18.54	8.63	20.92	10.62	21.06
84	13.22	14.97	10.19	11.39	7.12	26.04*	8.73	14.97	15.95	19.83	12.68	14.11	24.8*	16.12	16.6	15.31	10.07	41.04*	16.55	98.29	84.35	73.33	93.54	93.69	88.49	111.16	165.82	89.25	118.73	152.88	105.82	143.29	144.88	176.28	166	87.38	135.96	169.83	20.31	19.47	15.07	9.7	17.34	21.29	15.49	9	22.08	10.8	23.31
86	16.78	16.74	9.66	12.26	9.71	30.63*	10.45	14.78	16.76	14.57	14.05	13.34	22.03*	15.39	14.15	15.95	9.75	38.3*	18.65	101.09	85.48	81.38	94.93	95.54	91.22	121.58	170.46	88.32	119.94	153.97	108.27	142.19	146.3	172.18	167.81	87.29	138.15	171.38	25.13	16.69	20.35	12.06	20.79	23.03	15.29	11.12	27.96	12.98	26.33
88	16.45	17.93	11.51	14.5	10.55	39.66*	13.32	16.29	29.99*	17.08	12.56	17.03	28.99*	11.28	13	17.59	10.32	36.1*	22.64	97.6	83.39	79.57	91.78	94.13	84.81	115.76	165.16	87.02	119.75	144.74	106.21	142.89	142.49	177.16	167.57	87.65	139.67	164.34	24.95	19.1	17.37	13.47	20.43	25.88	18.04	12.83	33.29*	12.06	32.49*
90	18.8	17.77	12.67	14.41	11.27	39.9*	15.26	14.88	18.06	14.22	13.26	14.03	26.25*	20.66	15.31	18.17	11.9	35.95*	21	101.71	84.23	79.64	93.49	97.74	89.43	106.22	169.51	88.92	121.84	152.81	104.83	141.92	143.33	174.18	165.87	87.61	138.97	172.19	25.75	21.51	21.85	13.95	24.13	27.05	22.21		36.8*	22.41	27.51
92	17.01	19.11	13.06	15.28	11.31	44.07*	30.13*	17.47	31.04*	14.07	13.5	15.94	26.44*	16.44	13.75	19.71	11.83	42.21*	22.87	94.76	82.89	77.89	93.2	96.74	86.97	99.08	167.29	86.26	120.21	150.31	112.93	135.57	135.8	175.06	165.67	87.8	140.45	168.41	25.36	23.39	21.12	13.83	26.71	31.75	25.65		30.59*	21.04	43.18*
94	15.03	18.65	13.35	15.56	11.73	44.52*	15.34	14.97	20.29	14.23	13.09	18.62	26.19*	16.58	15.21	18.3	13.33	38.3*	21.53	96.75	80.4	78.35	94.18	95.32	85.26	103.95	166.23	84.55	118.99	148.97	111.69	140.65	139.59	171.42	164.57	81.61	139.38	168.33	27.61	24.17	21.86	15.8	22.33	26.11	19.22		43.52*	22.25	33
96	18.81	18.34	12.62	17.54	12.4	46.23*	14.13	15.74	24.35	21.67	14.32	18.6	25.12*	19.07	14.49	19.09	13.42	43.74*	23.39	96.56	82.92	76.88	96.49	94.87	87.67	103.89	163.45	86.92	119.18	129.79	111.06	140.81	134.24	175.06	164.53	86.98	142.67	163.44	29.75	21.35	21.76	24.36	25.46	32.69	23.61		28.25	26.73	35.06
98	18.06	18.09	13.87	20.08	12.46	56.39*	13.76	16.19	22.92	22.3	15.75	18.31	28.01*	16.62	16.96	20.52	14.45	45.13*	24.36	92.34	82.31	78.62	89.07	95.4	80.69	104.81	166.97	83.46	118.46	150.05	107.82	142.12	133.61	170.89	161.43	81.87	139.01	166.01	29.04	25.08	22.09	18.79	26.08	37.44	25.32		34.02*	25.9	33.38
100
102
104
	Rows highlighted in green represent the linear part of the reaction, and were used to calculate initial reaction rates.
[truncated: 26 more columns]

## Sheet: Figure2C_linear-regression
	100 nM mCherry-VPS34-CII WT	100 nM mCherry-VPS34-CII VPS15 mut. + VPS34 mut.	100 nM mCherry-VPS34-CII WT + RAB5A	100 nM mCherry-VPS34-CII VPS15 mut. + VPS34 mut. + RAB5A
Best-fit values
Slope	0.6812	0.5858	5.457	0.8446
Y-intercept	-40.12	-32.9	-145.9	-45.74
X-intercept	58.9	56.16	26.73	54.15
1/slope	1.468	1.707	0.1832	1.184
Std. Error
Slope	0.02946	0.117	0.3695	0.01448
Y-intercept	2.277	7.974	12.96	1.001
95% Confidence Intervals
Slope	0.6231 to 0.7392	0.3530 to 0.8186	4.721 to 6.193	0.8160 to 0.8731
Y-intercept	-44.61 to -35.64	-48.77 to -17.03	-171.7 to -120.0	-47.71 to -43.76
X-intercept	57.09 to 60.46	48.15 to 59.69	25.40 to 27.75	53.59 to 54.68
Goodness of Fit
R squared	0.7038	0.2386	0.7467	0.9455
Sy.x	3.532	2.995	7.203	1.397
Is slope significantly non-zero?
F	534.6	25.07	218.1	3401
DFn, DFd	1, 225	1, 80	1, 74	1, 196
P value	<0.0001	<0.0001	<0.0001	<0.0001
Deviation from zero?	Significant	Significant	Significant	Significant
Equation	Y = 0.6812*X - 40.12	Y = 0.5858*X - 32.90	Y = 5.457*X - 145.9	Y = 0.8446*X - 45.74
Data
Number of X values	2300	9472	5120	2050
Maximum number of Y replicates	19	19	19	18
Total number of values	227	82	76	198
Number of missing values	2073	9390	5044	1852

## Sheet: Figure2C_one-wayANOVA
One-way ANOVA
Column A = 100 nM mCherry-VPS34-CII WT
Column B = 100 nM mCherry-VPS34-CII VPS15 mut. + VPS34 mut.
Column E = 100 nM mCherry-VPS34-CII WT + RAB5A
Column F = 100 nM mCherry-VPS34-CII VPS15 mut. + VPS34 mut. + RAB5A
Number of families	1
Number of comparisons per family	6
Alpha	0.05
Tukey's multiple comparisons test	Mean Diff.	95.00% CI of diff.	Below threshold?	Summary	Adjusted P Value
Column A vs. Column B	0.0954	-0.08724 to 0.2780	No	ns	0.5183	A-B
Column A vs. Column E	-4.776	-4.954 to -4.598	Yes	****	<0.0001	A-E
Column A vs. Column F	-0.1634	-0.3460 to 0.01924	No	ns	0.0955	A-F
Column B vs. Column E	-4.871	-5.049 to -4.693	Yes	****	<0.0001	B-E
Column B vs. Column F	-0.2588	-0.4414 to -0.07616	Yes	**	0.0022	B-F
Column E vs. Column F	4.612	4.435 to 4.790	Yes	****	<0.0001	E-F
Test details	Mean 1	Mean 2	Mean Diff.	SE of diff.	n1	n2	q	DF
Column A vs. Column B	0.6812	0.5858	0.0954	0.0693	17	17	1.947	66
Column A vs. Column E	0.6812	5.457	-4.776	0.06745	17	19	100.1	66
Column A vs. Column F	0.6812	0.8446	-0.1634	0.0693	17	17	3.335	66
Column B vs. Column E	0.5858	5.457	-4.871	0.06745	17	19	102.1	66
Column B vs. Column F	0.5858	0.8446	-0.2588	0.0693	17	17	5.282	66
Column E vs. Column F	5.457	0.8446	4.612	0.06745	19	17	96.71	66
Compact letter display
Column E	A
Column F	B
Column A	B C
Column B	C

## Sheet: Fig2D-Raw(CII double mut+RAB5A)
Sample	mCherry channel intensity	AF488 channel intensity	AF488 channel background	averaged AF488 channel background	corrected AF488 channel intensity	AF488 channel intensity normalised by mCherry channel intensity
CII double mutant	82.616	0	0	0.0003	-0.0003	-3.63126e-06
0 µM RAB5A	197.339	0.002	0		0.0017	8.61462e-06
	53.935	0	0		-0.0003	-5.56225e-06
	77.332	0	0		-0.0003	-3.87938e-06
	85.759	0.004	0		0.0037	4.31442e-05
	68.754	0	0		-0.0003	-4.36338e-06
	72.006	0	0		-0.0003	-4.16632e-06
	85.068	0	0		-0.0003	-3.52659e-06
	42.779	0	0.003		-0.0003	-7.01279e-06
	41.037	0	0		-0.0003	-7.31048e-06
	47.248	0			-0.0003	-6.34948e-06
	37.688	0			-0.0003	-7.96009e-06
CII double mutant	85.824	3.222	2.81	2.7383	0.4837	0.00563595
1 µM RAB5A	94.003	3.11	2.875		0.3717	0.00395413
	126.203	2.96	2.762		0.2217	0.00175669
	49.312	2.517	2.845		-0.2213	-0.00448775
	36.611	2.866	2.863		0.1277	0.00348802
	20.673	2.724	2.708		-0.0143	-0.000691724
	23.53	2.686	2.604		-0.0523	-0.00222269
	32.363	2.791	2.699		0.0527	0.0016284
	40.215	2.845	2.604		0.1067	0.00265324
	60.263	3.006	2.613		0.2677	0.0044422
	36.603	2.53			-0.2083	-0.00569079
	38.547	2.921			0.1827	0.00473967
	47.883	3			0.2617	0.00546541
	33.849	2.93			0.1917	0.00566339
CII double mutant	66.536	9.662	8.707	8.5246	0.955	0.0143531
4 µM RAB5A	86.127	8.137	9.03		-0.57	-0.00661813
	46.679	7.882	9.087		-0.825	-0.0176739
	40.118	7.791	8.867		-0.916	-0.0228326
	35.324	8.046	8.193		-0.661	-0.0187125
	42.961	9.167	8.188		0.46	0.0107074
	37.951	8.018	8.155		-0.689	-0.018155
	38.843	8.951	8.351		0.244	0.0062817
	37.522	7.944	8.402		-0.763	-0.0203347
	25.444	8.324	8.266		-0.383	-0.0150527
	30.12	8.577			-0.13	-0.00431607
	30.851	8.746			0.039	0.00126414
CII double mutant	40.503	20.161	19.925	19.4064	0.7546	0.0186307
8 µM RAB5A	31.631	18.498	20.173		-0.9084	-0.0287187
	33.263	19.786	19.516		0.3796	0.0114121
	31.234	20.238	19.412		0.8316	0.0266248
	18.763	19.394	18.607		-0.0124	-0.000660875
	31.597	18.541	19.261		-0.8654	-0.0273887
	42.606	19.312	18.981		-0.0944	-0.00221565
	42.364	18.988	19.079		-0.4184	-0.00987631
	18.297	19.896	18.645		0.4896	0.0267585
	33.678	20.296	20.465		0.8896	0.0264149
	27.953	19.698			0.2916	0.0104318
	37.755	19.967			0.5606	0.0148484
	34.101	21			1.5936	0.0467318
CII double mutant	53.54	37.798	37.006	36.3549	1.4431	0.0269537
14 µM RAB5A	36.761	37.818	36.531		1.4631	0.0398003
	27.748	36.615	36.757		0.2601	0.00937365
	31.354	37.604	36.48		1.2491	0.0398386
	31.968	37.837	36.837		1.4821	0.046362
	37.19	36.015	36.203		-0.3399	-0.00913955
	81.148	38.49	35.349		2.1351	0.0263112
	31.045	36.237	35.066		-0.1179	-0.00379771
	36.566	37.531	36.289		1.1761	0.0321638
	31.46	37.206	37.031		0.8511	0.0270534
	34.715	36.521			0.1661	0.00478468
CII double mutant	70.751	63.486	62.718	61.2125	2.2735	0.0321338
20 µM RAB5A	57.643	61.371	60.503		0.1585	0.00274968
	53.002	59.574	61.027		-1.6385	-0.0309139
	47.884	58.553	60.081		-2.6595	-0.0555405
	45.657	61.047	60.487		-0.1655	-0.00362485
	34.793	59.193	61.168		-2.0195	-0.0580433
	57.71	61.405	60.973		0.1925	0.00333564
	39.711	60.673	61.309		-0.5395	-0.0135857
	41.589	57.355	61.419		-3.8575	-0.0927529
	33.005	55.599	62.44		-5.6135	-0.17008
	43.961	59.685			-1.5275	-0.0347467
	47.39	58.786			-2.4265	-0.0512028
CII double mutant	73.137	94.096	96.586	94.9832	-0.8872	-0.0121307
30 µM RAB5A	38.412	90.032	95.69		-4.9512	-0.128897
	53.151	93.201	95.976		-1.7822	-0.0335309
	36.021	89.839	93.088		-5.1442	-0.142811
	62.023	96.545	92.652		1.5618	0.025181
	41.751	93.581	93.243		-1.4022	-0.0335848
	33.434	90.732	91.845		-4.2512	-0.127152
	47.849	91.896	95.575		-3.0872	-0.0645196
	37.402	95.857	97.666		0.8738	0.0233624
	26.323	92.234	97.511		-2.7492	-0.104441
	33.108	89.765			-5.2182	-0.157611
	21.554	91.776			-3.2072	-0.148798

## Sheet: Fig2D-Analysis(CII d.m.+RAB5A)
	Raw data for non-linear fit (one site-specific binding)
	µM RAB5A-AF488
	0	-3.631e-06	8.6146e-06	-5.562e-06	-3.879e-06	4.3144e-05	-4.363e-06	-4.166e-06	-3.527e-06	-7.013e-06	-7.31e-06	-6.349e-06	-7.96e-06
	1	0.00563595	0.00395413	0.00175669	-0.0044878*	0.00348802	-0.0006917	-0.0022227*	0.0016284	0.00265324	0.0044422	-0.0056908*	0.00473967	0.00546541	0.00566339
	4	0.01435313*	-0.0066181	-0.0176739	-0.0228326*	-0.0187125	0.01070739*	-0.018155	0.0062817*	-0.0203347*	-0.0150527	-0.0043161	0.00126414
	8	0.0186307	-0.0287187*	0.0114121	0.0266248	-0.0006609	-0.0273887*	-0.0022157	-0.0098763*	0.0267585	0.0264149	0.0104318	0.0148484	0.04673177*
	14	0.0269537	0.0398003	0.00937365	0.0398386	0.04636199*	-0.0091396*	0.0263112	-0.0037977*	0.0321638	0.0270534	0.00478468
	20	0.03213382*	0.00274968	-0.0309139	-0.0555405	-0.0036249	-0.0580433	0.003335644*	-0.0135857	-0.092752891*	-0.1700803*	-0.0347467	-0.0512028
	30	-0.0121307*	-0.128897	-0.0335309	-0.1428111*	0.02518098*	-0.0335848	-0.127152	-0.0645196	0.023362387*	-0.104441	-0.157611453*	-0.1487984*

[truncated: 1 more sheets: Fig2G-WB quantification]
