# Supplementary material for: A novel RAB5 binding site in human VPS34-CII that is likely the primordial site in eukaryotic evolution
Source: eLife. 2026 May 28;15:RP110040. doi: 10.7554/eLife.110040 (PMC13218723; doi:10.7554/eLife.110040)
Supplement: Supplementary file 1. [file elife-110040-supp1.xlsx]

## Sheet: Meta Data
Complex II +RAB5A vs Complex II HDX Summary Table
Overall
Number of peptides	700
Average Standard Deviation	0.0109706
Timepoints (min)	[0.005, 0.05, 0.5, 5, 50.0]
Significance Threshold	+/-5.0%
Mean Difference	-0.00710056
Number of Repeats	3
Mean Coverage	0.85375
Mean Redundancy	2.625
Data Set	HSBECLIN1_FL		Data Set	HSUVRAG_FL		Data Set	HSVPS15_FL+13AA		Data Set	HSVPS34_FL
Number of peptides	73		Number of peptides	132		Number of peptides	297		Number of peptides	198
Average Standard Deviation	0.0122552		Average Standard Deviation	0.0105727		Average Standard Deviation	0.010685		Average Standard Deviation	0.0103697
Timepoints (sec)	[0.3, 3, 30, 300, 3000]		Timepoints (min)	[0.3, 3, 30, 300, 3000]		Timepoints (min)	[0.3, 3, 30, 300, 3000]		Timepoints (min)	[0.3, 3, 30, 300, 3000]
Significance Threshold	+/-5.0%		Significance Threshold	+/-5.0%		Significance Threshold	+/-5.0%		Significance Threshold	+/-5.0%
Mean Difference	-0.00260868		Mean Difference	-0.00749854		Mean Difference	-0.00952951		Mean Difference	-0.00876552
Number of Repeats	3		Number of Repeats	3		Number of Repeats	3		Number of Repeats	3
Sequence coverage	0.893		Sequence coverage	0.797		Sequence coverage	0.885		Sequence coverage	0.84
Redundancy	2.1		Redundancy	2.5		Redundancy	2.8		Redundancy	3.1

## Sheet: BECLIN1_deuteration_table
				Date:			-		SD	0.0122552																														for STDEV	Threshold Value=		0.3
Global Color scale				Experiment date:			-			-0.00260868																															Threshold percent		0.05
0.1	0.35	0.7		Sample:			HSBECLIN1_FL											-0.1	-0.05	0.05	0.1																				t-threshold		2.776
				Instrument:			Waters Synapt G2 Si
																										STDEVS					STDEVS
		Max Frac Deut		0.83		a	ComplexII_rab5					b	ComplexII_solo						a-b differences							a	ComplexII_rab5				b	ComplexII_solo									Differences in Daltons (Differences >+/- 0.5Da Highlighted					t-test	*=assumes triplicate values, a p=0.05 test
Start	End	Mod	m/z	#D	RT	0.3	3	30	300	3000		0.3	3	30	300	3000	Start	End	0.3	3	30	300	3000	Start	End	0.3	3	30	300	3000	0.3	3	30	300	3000						0.005	0.05	0.5	5	50	0.005	0.05	0.5	5
17	31		1723.84	12	8.81-8.87	0.0675703	0.120582	0.162851	0.199297	0.275		0.0569277	0.121988	0.163655	0.212851	0.275803	17	31	0.0106426	-0.00140562	-0.000803213	-0.0135542	-0.000803213	17	31	0.00963855	0.00893574	0.00732932	0.00331325	0.0060241	0.00451807	0.0064257	0.00903614	0.00722892	0.0188755						0.127711	-0.0168675	-0.00963855	-0.162651	-0.00963855	1.73167	-0.221203	-0.119572	-2.95227
32	41		1213.7	8	7.15-7.21	0.102259	0.265964	0.466717	0.714307	0.812801		0.0853916	0.278313	0.473042	0.728614	0.814608	32	41	0.0168675	-0.0123494	-0.0063253	-0.0143072	-0.00180723	32	41	0.010241	0.0204819	0.0128012	0.0137048	0.00391566	0.00813253	0.0126506	0.0180723	0.00993976	0.0566265						0.13494	-0.0987952	-0.0506024	-0.114458	-0.0144578	2.23405	-0.888509	-0.494689	-1.46373
35	41		859.44	5	5.95-6.01	0.0455422	0.181928	0.353976	0.71012	0.876867		0.0431325	0.190602	0.366506	0.724096	0.865783	35	41	0.00240964	-0.0086747	-0.0125301	-0.0139759	0.0110843	35	41	0.00722892	0.0159036	0.0159036	0.00698795	0.00385542	0.00746988	0.0053012	0.0151807	0.00771084	0.0643373						0.0120482	-0.0433735	-0.0626506	-0.0698795	0.0554217	0.401502	-0.896273	-0.987124	-2.32621
60	72		1480.62	10	8.89-8.95	0.255542	0.404096	0.448916	0.476747	0.476988		0.214337	0.42494	0.450843	0.510602	0.476506	60	72	0.0412048	-0.0208434	-0.00192771	-0.0338554	0.000481928	60	72	0.0387952	0.0381928	0.0153012	0.013012	0.00506024	0.0246988	0.0371084	0.0272289	0.019759	0.0345783						0.412048	-0.208434	-0.0192771	-0.338554	0.00481928	1.55183	-0.677948	-0.106901	-2.47855
73	79		757.372	5	4.19-4.22	0.216145	0.37012	0.506024	0.57012	0.568916		0.182651	0.387952	0.504096	0.614458	0.580482	73	79	0.033494	-0.0178313	0.00192771	-0.0443373	-0.0115663	73	79	0.0262651	0.0496386	0.0190361	0.0224096	0.0108434	0.0216867	0.0320482	0.0262651	0.0216867	0.053494						0.16747	-0.0891566	0.00963855	-0.221687	-0.0578313	1.7032	-0.522715	0.102931	-2.46254
73	88		1882.01	12	6.74-6.81	0.159137	0.295984	0.43494	0.493876	0.569277		0.132329	0.311747	0.421687	0.505924	0.552811	73	88	0.0268072	-0.0157631	0.013253	-0.0120482	0.0164659	73	88	0.0165663	0.0243976	0.0221888	0.0221888	0.00572289	0.014257	0.0227912	0.0173695	0.0175703	0.0430723						0.321687	-0.189157	0.159036	-0.144578	0.19759	2.12438	-0.81776	0.814618	-0.737312
97	112		1653.76	14	11.14-11.17	0.416954	0.534596	0.595267	0.610843	0.613167		0.323322	0.530637	0.554475	0.60895	0.590792	97	112	0.0936317	0.00395869	0.0407917	0.00189329	0.0223752	97	112	0.0507745	0.0415663	0.0165232	0.019191	0.00619621	0.0309811	0.0445783	0.0295181	0.0277108	0.0486231						1.31084	0.0554217	0.571084	0.026506	0.313253	2.72654	0.112495	2.08861	0.0972864
100	112		1292.56	11	8.60-8.64	0.36966	0.442278	0.485542	0.516758	0.510843		0.304819	0.458269	0.463855	0.524644	0.503943	100	112	0.0648412	-0.0159912	0.0216867	-0.00788609	0.00690033	100	112	0.0535597	0.0572837	0.0194962	0.0288061	0.00843373	0.0243154	0.0452355	0.0392114	0.032092	0.0407448						0.713253	-0.175904	0.238554	-0.086747	0.0759036	1.90933	-0.379467	0.857773	-0.316739
113	122		1143.67	8	6.05-6.13	0.13509	0.439759	0.576657	0.636747	0.641717		0.123042	0.460241	0.587349	0.66747	0.638404	113	122	0.0120482	-0.0204819	-0.0106928	-0.0307229	0.00331325	113	122	0.0161145	0.0332831	0.0271084	0.0125	0.00361446	0.0134036	0.027259	0.025	0.0165663	0.0662651						0.0963855	-0.163855	-0.0855422	-0.245783	0.026506	0.995602	-0.824611	-0.50223	-2.56413
119	125		779.37	5	10.58-10.61	0.0313253	0.124096	0.312048	0.464578	0.528916		0.0204819	0.133735	0.312771	0.498554	0.531325	119	125	0.0108434	-0.00963855	-0.000722892	-0.0339759	-0.00240964	119	125	0.00915663	0.013494	0.0103614	0.00433735	0.00481928	0.0053012	0.00819277	0.0139759	0.0149398	0.0371084						0.0542169	-0.0481928	-0.00361446	-0.16988	-0.0120482	1.77509	-1.05753	-0.0719678	-3.78282
122	128		781.368	5	8.22-8.34	0.00409639	0.099759	0.235904	0.355181	0.36747		0.00987952	0.102892	0.190843	0.326506	0.344337	122	128	-0.00578313	-0.00313253	0.0450602	0.0286747	0.0231325	122	128	0.00168675	0.0185542	0.00795181	0.0156627	0.0122892	0.00578313	0.00650602	0.00674699	0.0125301	0.0286747						-0.0289157	-0.0156627	0.225301	0.143373	0.115663	-1.66277	-0.275951	7.48399	2.47612
123	136		1573.71	11	9.83-9.88	0.0108434	0.0112815	0.0236583	0.111829	0.243483		0.0119387	0.00887185	0.0359255	0.13023	0.262541	123	136	-0.00109529	0.00240964	-0.0122673	-0.0184009	-0.0190581	123	136	0.00481928	0.00657174	0.00930997	0.0180723	0.0236583	0.0175246	0.00525739	0.00492881	0.0179628	0.0292442						-0.0120482	0.026506	-0.13494	-0.20241	-0.209639	-0.104378	0.495918	-2.01701	-1.2508
123	137		1676.72	12	10.01-10.06	0.00873494	0.0211847	0.0369478	0.127108	0.236245		0.00983936	0.0210843	0.0443775	0.117671	0.249096	123	137	-0.00110442	0.000100402	-0.00742972	0.00943775	-0.0128514	123	137	0.00261044	0.00180723	0.00170683	0.0311245	0.00361446	0.00240964	0.00120482	0.00983936	0.0123494	0.0332329						-0.013253	0.00120482	-0.0891566	0.113253	-0.154217	-0.538457	0.0800641	-1.28863	0.488179
123	139		1934.8	14	9.85-9.91	0.00654045	0.0219449	0.0526678	0.124785	0.247676		0.00654045	0.0241824	0.0537866	0.132444	0.252324	123	139	0	-0.00223752	-0.00111876	-0.00765921	-0.00464716	123	139	0.0020654	0.0055938	0.00481928	0.00654045	0.00464716	0.0020654	0.00129088	0.00266781	0.00593804	0.0223752						0	-0.0313253	-0.0156627	-0.107229	-0.0650602	0	-0.675078	-0.35178	-1.50173
124	139		1787.73	13	8.72-8.79	0.00834106	0.028823	0.0640408	0.140408	0.271826		0.016126	0.034569	0.0735867	0.161075	0.280723	124	139	-0.00778499	-0.00574606	-0.00954588	-0.0206673	-0.00889713	124	139	0.00583874	0.00620945	0.00695088	0.00843373	0.00732159	0.00305839	0.00481928	0.00954588	0.00593142	0.0255792						-0.101205	-0.0746988	-0.124096	-0.268675	-0.115663	-2.04574	-1.26619	-1.40018	-3.47182
127	138		1299.54	9	6.95-7.02	0.00187416	0.0246319	0.0483266	0.131995	0.275368		0.0261044	0.0323963	0.0544846	0.173092	0.295315	127	138	-0.0242303	-0.00776439	-0.00615797	-0.0410977	-0.0199465	127	138	0.0133869	0.00227577	0.0140562	0.0156627	0.00963855	0.0109772	0.00495315	0.0103079	0.0140562	0.0344043						-0.218072	-0.0698795	-0.0554217	-0.36988	-0.179518	-2.4242	-2.46715	-0.611903	-3.38242
127	139		1428.58	10	7.12-7.16	0.00891566	0.0273494	0.0736145	0.171566	0.278193		0.00192771	0.0348193	0.0889157	0.179398	0.305301	127	139	0.00698795	-0.00746988	-0.0153012	-0.00783133	-0.0271084	127	139	0.0106024	0.00987952	0.013253	0.0053012	0.01	0.00795181	0.00481928	0.00795181	0.00963855	0.0221687						0.0698795	-0.0746988	-0.153012	-0.0783133	-0.271084	0.913263	-1.17703	-1.71476	-1.23309
133	146		1602.65	11	9.54-9.61	0.0871851	0.151807	0.196824	0.276232	0.383352		0.0719606	0.157612	0.190581	0.295181	0.38368	133	146	0.0152245	-0.00580504	0.00624315	-0.0189485	-0.000328587	133	146	0.0119387	0.0196057	0.00865279	0.00492881	0.00481928	0.00930997	0.0128149	0.00952903	0.0100767	0.0295728						0.16747	-0.0638554	0.0686747	-0.208434	-0.00361446	1.74177	-0.429275	0.840115	-2.92577
139	145		793.353	5	9.40-9.48	0.0142169	0.00554217	0.0313253	0.123133	0.161687		0.00289157	0.00240964	0.0214458	0.132771	0.158072	139	145	0.0113253	0.00313253	0.00987952	-0.00963855	0.00361446	139	145	0.00650602	0.00240964	0.0053012	0.0053012	0.00819277	0.0026506	0.00192771	0.00192771	0.00939759	0.0161446						0.0566265	0.0156627	0.0493976	-0.0481928	0.0180723	2.79222	1.75826	3.03357	-1.54726
146	152		831.397	5	8.35-8.42	0.0103614	0.0053012	0.0344578	0.188434	0.440482		0.0207229	0.0436145	0.0742169	0.253012	0.498313	146	152	-0.0103614	-0.0383133	-0.039759	-0.0645783	-0.0578313	146	152	0.00313253	0.00795181	0.00891566	0.0161446	0.020241	0.00385542	0.00987952	0.0159036	0.0086747	0.0301205						-0.0518072	-0.191566	-0.198795	-0.322892	-0.289157	-3.61272	-5.2326	-3.77709	-6.10301
149	157		1032.47	7	7.72-7.85	0.238554	0.452496	0.5	0.532702	0.504303		0.181928	0.45525	0.46988	0.524441	0.495181	149	157	0.0566265	-0.00275387	0.0301205	0.00826162	0.0091222	149	157	0.0137694	0.0344234	0.0184165	0.016179	0.0130809	0.0342513	0.0185886	0.0246127	0.019105	0.0444062						0.396386	-0.0192771	0.210843	0.0578313	0.0638554	2.65689	-0.121923	1.69714	0.571577
153	161		1049.41	7	5.09-5.13	0.00860585	0.0306368	0.143373	0.467986	0.798451		0.00378657	0.0373494	0.19346	0.586231	0.860585	153	161	0.00481928	-0.00671256	-0.0500861	-0.118244	-0.0621343	153	161	0.000860585	0.00636833	0.00654045	0.00499139	0.00464716	0.00189329	0.00378657	0.0091222	0.00636833	0.00671256						0.0337349	-0.046988	-0.350602	-0.827711	-0.43494	4.01368	-1.56923	-7.72869	-25.3117
162	169		1036.57	6	8.77-8.85	0.0238956	0.00983936	0.0253012	0.0843373	0.392972		0.00481928	0.0228916	0.0114458	0.130522	0.434739	162	169	0.0190763	-0.0130522	0.0138554	-0.0461847	-0.0417671	162	169	0.0126506	0.00763052	0.0281124	0.00823293	0.0182731	0.00522088	0.0174699	0.00823293	0.012249	0.0261044						0.114458	-0.0783133	0.0831325	-0.277108	-0.250602	2.4143	-1.18588	0.819245	-5.42015
173	180		948.367	6	6.82-6.85	0.261647	0.456426	0.588755	0.643775	0.618273		0.205622	0.45261	0.606827	0.663454	0.631727	173	180	0.0560241	0.00381526	-0.0180723	-0.0196787	-0.0134538	173	180	0.0381526	0.0166667	0.00461847	0.00963855	0.0128514	0.0182731	0.024498	0.026506	0.00522088	0.0291165						0.336145	0.0228916	-0.108434	-0.118072	-0.0807229	2.29386	0.223026	-1.16341	-3.10941
181	187		889.458	5	6.21-6.28	0.00819277	0.0108434	0.0137349	0.0125301	0.013253		0.00674699	0.0086747	0.0120482	0.00987952	0.0125301	181	187	0.00144578	0.00216867	0.00168675	0.0026506	0.000722892	181	187	0.00506024	0.00216867	0.00120482	0.00457831	0.00433735	0.00216867	0.00554217	0.00698795	0.00289157	0.00120482						0.00722892	0.0108434	0.00843373	0.013253	0.00361446	0.454859	0.631158	0.412002	0.847828
185	202		2184.12	16	10.39-10.43	0.140587	0.202786	0.230723	0.283283	0.296687		0.103464	0.212952	0.23366	0.306099	0.31762	185	202	0.0371235	-0.0101657	-0.00293675	-0.0228163	-0.0209337	185	202	0.0224398	0.015738	0.00436747	0.0125	0.00625	0.010994	0.0287651	0.0142319	0.0113705	0.0254518						0.593976	-0.162651	-0.046988	-0.36506	-0.33494	2.57321	-0.536994	-0.34168	-2.33869
187	198		1454.8	10	8.34-8.52	0.0579518	0.150482	0.214819	0.367952	0.590723		0.0536145	0.159518	0.22747	0.394819	0.618193	187	198	0.00433735	-0.00903614	-0.0126506	-0.0268675	-0.0274699	187	198	0.00566265	0.0138554	0.00337349	0.00313253	0.00313253	0.00903614	0.00855422	0.00819277	0.00156627	0.0162651						0.0433735	-0.0903614	-0.126506	-0.268675	-0.274699	0.704484	-0.96117	-2.47304	-13.2873
195	212		2139.15	16	8.41-8.48	0.0241717	0.0219127	0.0141566	0.0426205	0.096762		0.021009	0.00173193	0.00978916	0.035241	0.0899849	195	212	0.00316265	0.0201807	0.00436747	0.00737952	0.00677711	195	212	0.0103916	0.0107681	0.0161145	0.00625	0.00948795	0.00316265	0.00128012	0.00798193	0.00745482	0.00278614						0.0506024	0.322892	0.0698795	0.118072	0.108434	0.504307	3.22338	0.420658	1.31389
199	212		1655.88	12	6.66-6.72	0.0338353	0.025	0.0151606	0.0342369	0.11988		0.00823293	0.0231928	0.0208835	0.0355422	0.135241	199	212	0.0256024	0.00180723	-0.00572289	-0.00130522	-0.0153614	199	212	0.00522088	0.0128514	0.0217871	0.00200803	0.00742972	0.00722892	0.00431727	0.00230924	0.00180723	0.00532129						0.307229	0.0216867	-0.0686747	-0.0156627	-0.184337	4.97299	0.230889	-0.452428	-0.836825
201	212		1411.81	10	5.99-6.06	-0.000963855	0.000722892	0.00481928	0.0175904	0.111084		-0.00373494	-0.000240964	0.0026506	0.0168675	0.120361	201	212	0.00277108	0.000963855	0.00216867	0.000722892	-0.00927711	201	212	0.00228916	0.00313253	0.00180723	0.000240964	0.00180723	0.00253012	0.00192771	0.0046988	0.00144578	0.0112048						0.0277108	0.00963855	0.0216867	0.00722892	-0.0927711	1.4067	0.453882	0.746124	0.854242
213	219		773.392	5	4.56-4.60	0.0108434	-0.00722892	0.0113253	0.093494	0.332289		-0.000481928	0.000963855	0.00819277	0.100723	0.347711	213	219	0.0113253	-0.00819277	0.00313253	-0.00722892	-0.0154217	213	219	0.00843373	0.00626506	0.00506024	0.013494	0.00313253	0.0053012	0.0053012	0.00939759	0.0171084	0.0168675						0.0566265	-0.0409639	0.0156627	-0.0361446	-0.0771084	1.96919	-1.72906	0.50834	-0.574625
213	222		1171.62	8	6.29-6.38	-0.000301205	-0.00798193	0.0141566	0.128916	0.448042		0.00180723	0.00798193	0.0118976	0.089759	0.418524	213	222	-0.00210843	-0.0159639	0.00225904	0.0391566	0.0295181	213	222	0.0156627	0.00195783	0.00858434	0.00798193	0.0165663	0.00391566	0.00692771	0.00376506	0.00271084	0.0266566						-0.0168675	-0.127711	0.0180723	0.313253	0.236145	-0.226199	-3.84082	0.417419	8.04551
213	228		1871.89	14	6.62-6.67	0.00903614	0.0151463	0.0451807	0.227022	0.521256		0.00335628	0.0095525	0.0370052	0.209552	0.511618	213	228	0.00567986	0.0055938	0.00817556	0.0174699	0.00963855	213	228	0.00258176	0.00628227	0.0020654	0.0020654	0.0095525	0.00129088	0.0045611	0.00292599	0.00619621	0.0306368						0.0795181	0.0783133	0.114458	0.244578	0.13494	3.40823	1.248	3.95376	4.63282
214	220		773.392	5	4.55-4.60	0.0173494	0.00650602	0.0110843	0.0816867	0.333012		0.00722892	0.00240964	0.020241	0.11253	0.345783	214	220	0.0101205	0.00409639	-0.00915663	-0.0308434	-0.0127711	214	220	0.00650602	0.00433735	0.00963855	0.0144578	0.00891566	0.0106024	0.00168675	0.0137349	0.0125301	0.0195181						0.0506024	0.0204819	-0.0457831	-0.154217	-0.0638554	1.40916	1.5246	-0.945188	-2.7923
229	248		2616.28	18	9.31-9.36	0.110107	0.222892	0.290027	0.363186	0.398929		0.10261	0.22838	0.292236	0.388086	0.401071	229	248	0.00749665	-0.00548862	-0.00220884	-0.0248996	-0.0021419	229	248	0.0250335	0.01834	0.00435074	0.00950469	0.00475234	0.0213521	0.015261	0.0120482	0.0189424	0.0424364						0.13494	-0.0987952	-0.039759	-0.448193	-0.0385542	0.394636	-0.398447	-0.298666	-2.03496
237	243		913.534	5	7.06-7.17	0.0120482	0.0060241	0.0156627	0.0180723	0.0840964		-0.000722892	0.00915663	0.0113253	0.0277108	0.0720482	237	243	0.0127711	-0.00313253	0.00433735	-0.00963855	0.0120482	237	243	0.00506024	0.00313253	0.00650602	0.00433735	0.00481928	0.00963855	0.00795181	0.00409639	0.00578313	0.00843373						0.0638554	-0.0156627	0.0216867	-0.0481928	0.060241	2.03196	-0.634839	0.977146	-2.3094
244	261		2167.02	16	10.24-10.28	0.000677711	0.000451807	0.00572289	0.0243223	0.120331		0.000376506	0.00135542	0.00474398	0.0280873	0.12628	244	261	0.000301205	-0.000903614	0.000978916	-0.00376506	-0.0059488	244	261	0.000150602	0.00120482	0.000978916	0.00308735	0.00271084	0.000301205	0.000677711	0.00112952	0.000903614	0.0106928						0.00481928	-0.0144578	0.0156627	-0.060241	-0.0951807	1.54919	-1.13221	1.13437	-2.02721
248	254		834.391	5	5.41-5.46	0.0236145	0.0308434	0.0491566	0.0696386	0.0583133		0.00987952	0.00746988	0.026988	0.0409639	0.0416867	248	254	0.0137349	0.0233735	0.0221687	0.0286747	0.0166265	248	254	0.00313253	0.0238554	0.0122892	0.00554217	0.0113253	0.0053012	0.00987952	0.0149398	0.00843373	0.00361446						0.0686747	0.116867	0.110843	0.143373	0.0831325	3.86348	1.56792	1.98489	4.92145
248	261		1694.84	12	7.71-7.81	0.0166667	0.00993976	0.0315261	0.0251004	0.142972		0.00261044	0.00371486	0.00813253	0.0336345	0.160843	248	261	0.0140562	0.0062249	0.0233936	-0.00853414	-0.0178715	248	261	0.0125502	0.00732932	0.00773092	0.00371486	0.00461847	0.00562249	0.00451807	0.00110442	0.00451807	0.00712851						0.168675	0.0746988	0.280723	-0.10241	-0.214458	1.77036	1.25225	5.18846	-2.52711
255	261		878.461	5	6.47-6.54	0.0137349	0.00650602	0.0139759	0.059759	0.265783		0.0086747	0.00385542	0.0166265	0.0681928	0.279518	255	261	0.00506024	0.0026506	-0.0026506	-0.00843373	-0.0137349	255	261	0.00216867	0.0026506	0.0060241	0.00361446	0.00409639	0.0086747	0.00433735	0.00626506	0.00650602	0.0185542						0.0253012	0.013253	-0.013253	-0.0421687	-0.0686747	0.980196	0.903178	-0.52822	-1.9627
262	269		944.566	6	4.19-4.22	0.141566	0.314458	0.427108	0.55	0.637952		0.134137	0.327309	0.440361	0.584337	0.662851	262	269	0.00742972	-0.0128514	-0.013253	-0.0343373	-0.0248996	262	269	0.024498	0.0251004	0.00883534	0.0108434	0.00722892	0.0062249	0.023494	0.0196787	0.0150602	0.0196787						0.0445783	-0.0771084	-0.0795181	-0.206024	-0.149398	0.509115	-0.647445	-1.06415	-3.20481
262	274		1524.83	11	8.62-8.69	0.0635268	0.164074	0.263965	0.363636	0.493209		0.0592552	0.174261	0.274699	0.389047	0.5069	262	274	0.00427163	-0.0101862	-0.0107338	-0.0254107	-0.0136911	262	274	0.0120482	0.0135816	0.00887185	0.00317634	0.00777656	0.000766703	0.0154436	0.0124863	0.00722892	0.0167579						0.046988	-0.112048	-0.118072	-0.279518	-0.150602	0.612851	-0.857869	-1.21377	-5.57407
271	287		1942.91	15	9.30-9.34	0.0518072	0.0878715	0.123534	0.16506	0.216627		0.0490763	0.08249	0.131004	0.178153	0.213976	271	287	0.00273092	0.00538153	-0.00746988	-0.0130924	0.0026506	271	287	0.00787149	0.00634538	0.0115663	0.00409639	0.00706827	0.00626506	0.00995984	0.0146988	0.0154217	0.0176707						0.0409639	0.0807229	-0.112048	-0.196386	0.039759	0.470171	0.789292	-0.691741	-1.42116
275	282		1010.47	6	7.51-7.59	0.0604418	0.0779116	0.118273	0.230924	0.288755		0.039759	0.0783133	0.11747	0.225301	0.281526	275	282	0.0206827	-0.000401606	0.000803213	0.00562249	0.00722892	275	282	0.0212851	0.0168675	0.00120482	0.00823293	0.00943775	0.00803213	0.00742972	0.0162651	0.0110442	0.0064257						0.124096	-0.00240964	0.00481928	0.0337349	0.0433735	1.57465	-0.0377403	0.0852997	0.706957
275	287		1509.71	11	7.62-7.70	0.0364732	0.0561884	0.103505	0.150712	0.198576		0.0315444	0.0633078	0.103286	0.162651	0.201095	275	287	0.00492881	-0.00711939	0.000219058	-0.0119387	-0.00251917	275	287	0.00306681	0.00657174	0.00470975	0.00394304	0.00350493	0.00394304	0.00350493	0.00569551	0.00843373	0.0168675						0.0542169	-0.0783133	0.00240964	-0.131325	-0.0277108	1.709	-1.65564	0.0513383	-2.2211
275	288		1656.78	12	9.26-9.33	0.0619478	0.0842369	0.114357	0.155422	0.199598		0.0488956	0.0796185	0.120783	0.173896	0.192369	275	288	0.0130522	0.00461847	-0.0064257	-0.0184739	0.00722892	275	288	0.00522088	0.0162651	0.00833333	0.00682731	0.00863454	0.00411647	0.0158635	0.00763052	0.00843373	0.0193775						0.156627	0.0554217	-0.0771084	-0.221687	0.086747	3.40032	0.352087	-0.985004	-2.94888
288	300		1554.87	9	10.87-10.94	0.114324	0.164793	0.251406	0.409505	0.467871		0.0939759	0.172423	0.257965	0.440161	0.476439	288	300	0.0203481	-0.00763052	-0.00655957	-0.030656	-0.0085676	288	300	0.0120482	0.0145917	0.00696118	0.00736278	0.00267738	0.00870147	0.010174	0.0121821	0.00829987	0.0327979						0.183133	-0.0686747	-0.0590361	-0.275904	-0.0771084	2.37143	-0.74298	-0.809761	-4.78574
288	302		1797.95	11	10.14-10.19	0.134502	0.185433	0.270975	0.442607	0.490471		0.101862	0.187952	0.271522	0.471961	0.513143	288	302	0.0326396	-0.00251917	-0.000547645	-0.0293538	-0.0226725	288	302	0.0181818	0.0256298	0.00547645	0.00788609	0.00777656	0.00920044	0.0124863	0.011172	0.00481928	0.00547645						0.359036	-0.0277108	-0.0060241	-0.322892	-0.249398	2.77436	-0.153048	-0.0762375	-5.50117
288	304		2025.08	13	10.42-10.46	0.113902	0.158109	0.231789	0.382391	0.421594		0.0980538	0.167006	0.240037	0.407322	0.448471	288	304	0.015848	-0.00889713	-0.00824838	-0.0249305	-0.0268767	288	304	0.0133457	0.0127896	0.00824838	0.00834106	0.00111214	0.01038	0.00880445	0.0094532	0.0081557	0.00222428						0.206024	-0.115663	-0.107229	-0.324096	-0.349398	1.62355	-0.992472	-1.13875	-3.70152
288	312		2851.51	21	12.20-12.25	0.073035	0.0997131	0.14957	0.242283	0.261446		0.0610442	0.104188	0.156053	0.245726	0.264773	288	312	0.0119908	-0.00447504	-0.00648308	-0.00344234	-0.0033276	288	312	0.00734366	0.00757315	0.00694205	0.00252438	0.00298336	0.00481928	0.00631096	0.00636833	0.0122777	0.0160643						0.251807	-0.0939759	-0.136145	-0.0722892	-0.0698795	2.36444	-0.786263	-1.19196	-0.475671
289	300		1407.8	8	9.86-9.94	0.115964	0.164307	0.288554	0.460392	0.516566		0.110542	0.197139	0.316867	0.524247	0.564608	289	300	0.00542169	-0.0328313	-0.0283133	-0.0638554	-0.0480422	289	300	0.0173193	0.0195783	0.0128012	0.00783133	0.00256024	0.00451807	0.0167169	0.0141566	0.011747	0.00798193						0.0433735	-0.262651	-0.226506	-0.510843	-0.384337	0.524649	-2.20887	-2.5694	-7.83396
313	325		1454.84	11	9.15-9.20	0.0190581	0.0818182	0.135597	0.194414	0.258379		0.0159912	0.10011	0.133406	0.206791	0.26046	313	325	0.00306681	-0.0182913	0.00219058	-0.0123768	-0.00208105	313	325	0.00481928	0.00777656	0.0041621	0.00591457	0.00394304	0.00273823	0.0141292	0.0110624	0.00558598	0.0174151						0.0337349	-0.201205	0.0240964	-0.136145	-0.0228916	0.958327	-1.96439	0.321012	-2.63504
315	339		2975.57	22	8.39-8.47	0.0133078	0.0570646	0.0986857	0.188883	0.267251		0.0148412	0.0653888	0.1092	0.201643	0.268401	315	339	-0.00153341	-0.00832421	-0.0105148	-0.0127601	-0.00115005	315	339	0.00903614	0.00394304	0.00328587	0.00673604	0.00136911	0.00142388	0.00355969	0.00487404	0.00361446	0.0190581						-0.0337349	-0.183133	-0.231325	-0.280723	-0.0253012	-0.290341	-2.71414	-3.09825	-2.89112
340	359		2242.13	17	10.20-10.24	0.256485	0.354075	0.440822	0.483416	0.505245		0.213324	0.370305	0.440822	0.509639	0.510418	340	359	0.0431609	-0.0162296	0	-0.0262225	-0.00517364	340	359	0.0301205	0.0328136	0.0128987	0.012686	0.00538625	0.0200567	0.0245925	0.0163714	0.0209072	0.0396882						0.733735	-0.275904	0	-0.445783	-0.0879518	2.06584	-0.685516	0	-1.85724
342	359		2026.06	15	9.96-10.00	0.238715	0.327791	0.405462	0.434779	0.453494		0.198313	0.341124	0.407631	0.465783	0.460723	342	359	0.0404016	-0.0133333	-0.00216867	-0.031004	-0.00722892	342	359	0.0277912	0.0283534	0.0143775	0.00955823	0.0060241	0.013494	0.0164659	0.0179116	0.0148594	0.0353414						0.606024	-0.2	-0.0325301	-0.46506	-0.108434	2.26509	-0.704347	-0.163541	-3.0394
351	357		711.326	5	7.85-7.93	0.00650602	0.00289157	0.0060241	0.0156627	0.0489157		-0.00457831	-0.00409639	-0.00506024	-0.00240964	0.0320482	351	357	0.0110843	0.00698795	0.0110843	0.0180723	0.0168675	351	357	0.00457831	0.00409639	0.00457831	0.00746988	0.00313253	0.00578313	0.00554217	0.00722892	0.00144578	0.00361446						0.0554217	0.0349398	0.0554217	0.0903614	0.0843373	2.60285	1.75623	2.24368	4.11409
360	369		1309.56	8	9.17-9.24	0.0420181	0.0676205	0.0996988	0.165964	0.183584		0.0341867	0.0715361	0.106627	0.184789	0.188102	360	369	0.00783133	-0.00391566	-0.00692771	-0.0188253	-0.00451807	360	369	0.00662651	0.0120482	0.00361446	0.00361446	0.00301205	0.0064759	0.00346386	0.00135542	0.00542169	0.0152108						0.0626506	-0.0313253	-0.0554217	-0.150602	-0.0361446	1.46397	-0.541002	-3.10839	-5.004
360	371		1479.66	10	9.44-9.47	0.0414458	0.0644578	0.0909639	0.12506	0.147229		0.0144578	0.0587952	0.083012	0.13	0.148434	360	371	0.026988	0.00566265	0.00795181	-0.00493976	-0.00120482	360	371	0.0138554	0.00795181	0.0177108	0.0166265	0.00590361	0.0053012	0.0136145	0.0151807	0.00939759	0.0138554						0.26988	0.0566265	0.0795181	-0.0493976	-0.0120482	3.15097	0.622076	0.59044	-0.447987
360	372		1626.73	11	10.96-11.03	0.035816	0.046988	0.0709748	0.11391	0.127273		0.0215772	0.0478642	0.0823658	0.128587	0.122015	360	372	0.0142388	-0.000876232	-0.011391	-0.0146769	0.00525739	360	372	0.00711939	0.00865279	0.00492881	0.00865279	0.00295728	0.00985761	0.00186199	0.0120482	0.0115005	0.0104053						0.156627	-0.00963855	-0.125301	-0.161446	0.0578313	2.0282	-0.171472	-1.51565	-1.76632
373	396		2947.4	21	11.24-11.29	0.11136	0.209122	0.273896	0.347791	0.37533		0.101721	0.229834	0.294091	0.370568	0.386804	373	396	0.00963855	-0.0207114	-0.0201951	-0.0227768	-0.0114745	373	396	0.00998279	0.0205393	0.00625359	0.0134251	0.0010327	0.00998279	0.0212278	0.0146299	0.00625359	0.0293173						0.20241	-0.43494	-0.424096	-0.478313	-0.240964	1.18251	-1.21449	-2.19848	-2.66375
374	380		866.396	5	4.96-5.02	0.0778313	0.0992771	0.107711	0.199277	0.423614		0.0426506	0.0754217	0.0836145	0.223133	0.45253	374	380	0.0351807	0.0238554	0.0240964	-0.0238554	-0.0289157	374	380	0.00433735	0.00144578	0.00746988	0.00337349	0.00771084	0.00409639	0.00481928	0.00313253	0.00554217	0.00987952						0.175904	0.119277	0.120482	-0.119277	-0.144578	10.2137	8.21207	5.15254	-6.36835
374	390		2070.97	15	10.06-10.12	0.126827	0.186827	0.225622	0.278233	0.297912		0.109237	0.19743	0.226345	0.301526	0.306265	374	390	0.0175904	-0.0106024	-0.000722892	-0.0232932	-0.00835341	374	390	0.0118876	0.0160643	0.00554217	0.00401606	0.00353414	0.00538153	0.0151807	0.0106024	0.0195984	0.022249						0.263855	-0.159036	-0.0108434	-0.349398	-0.125301	2.33486	-0.830857	-0.104658	-2.01668
379	390		1497.75	10	6.49-6.55	0.169036	0.248313	0.284337	0.356386	0.381566		0.144458	0.255542	0.289759	0.382651	0.397711	379	390	0.0245783	-0.00722892	-0.00542169	-0.0262651	-0.0161446	379	390	0.0175904	0.016506	0.0073494	0.0174699	0.0073494	0.0046988	0.0209639	0.00493976	0.0263855	0.029759						0.245783	-0.0722892	-0.0542169	-0.262651	-0.161446	2.33814	-0.469261	-1.06046	-1.4376
379	396		2261.1	15	8.84-8.92	0.149398	0.271486	0.35743	0.435261	0.468273		0.115261	0.279197	0.344418	0.443454	0.447229	379	396	0.0341365	-0.00771084	0.013012	-0.00819277	0.0210442	379	396	0.0131727	0.0213655	0.026988	0.0153414	0.0158233	0.0139759	0.0215261	0.0176707	0.00738956	0.0298795						0.512048	-0.115663	0.195181	-0.122892	0.315663	3.07863	-0.440355	0.698657	-0.833336
382	396		1856.89	12	9.11-9.17	0.162751	0.334237	0.425502	0.509036	0.513454		0.122289	0.326305	0.399398	0.50753	0.505622	382	396	0.0404618	0.00793173	0.0261044	0.00150602	0.00783133	382	396	0.0378514	0.0228916	0.013755	0.0336345	0.0289157	0.00702811	0.0236948	0.0156627	0.0134538	0.00441767						0.485542	0.0951807	0.313253	0.0180723	0.0939759	1.82039	0.416985	2.16905	0.0720076
397	412		1534.71	14	4.88-4.92	0.133907	0.22642	0.280379	0.330034	0.396902		0.106196	0.231153	0.266609	0.349742	0.398709	397	412	0.0277108	-0.00473322	0.0137694	-0.0197074	-0.00180723	397	412	0.0181583	0.0320138	0.0166954	0.0169535	0.00886403	0.0124785	0.0208262	0.0211704	0.0173838	0.0401893						0.387952	-0.0662651	0.192771	-0.275904	-0.0253012	2.17843	-0.214658	0.884568	-1.40574
397	413		1697.77	15	5.97-6.01	0.114056	0.192369	0.244659	0.299277	0.390683		0.0943775	0.205542	0.237189	0.323775	0.396867	397	413	0.0196787	-0.0131727	0.00746988	-0.024498	-0.00618474	397	413	0.0163052	0.0262651	0.0120482	0.0127711	0.0107631	0.0118072	0.0199197	0.0167871	0.0181526	0.0355823						0.295181	-0.19759	0.112048	-0.36747	-0.0927711	1.69311	-0.692135	0.626148	-1.91177
397	419		2402.16	21	7.81-7.89	0.100803	0.201606	0.252438	0.310442	0.468216		0.083362	0.208032	0.242513	0.325072	0.467871	397	419	0.0174412	-0.0064257	0.00992542	-0.0146299	0.000344234	397	419	0.0172691	0.0246701	0.0104991	0.0138841	0.0133104	0.00963855	0.0176133	0.0153184	0.017097	0.0430293						0.366265	-0.13494	0.208434	-0.307229	0.00722892	1.5275	-0.367164	0.925703	-1.15053
413	419		885.46	5	8.28-8.36	0.0559036	0.157108	0.181446	0.255181	0.611566		0.0542169	0.168434	0.181928	0.27012	0.627711	413	419	0.00168675	-0.0113253	-0.000481928	-0.0149398	-0.0161446	413	419	0.00481928	0.0171084	0.0103614	0.00216867	0.0118072	0.00506024	0.0183133	0.00385542	0.0144578	0.0440964						0.00843373	-0.0566265	-0.00240964	-0.0746988	-0.0807229	0.418081	-0.782718	-0.0755031	-1.76998
420	431		1479.74	10	9.93-10.02	0.0122892	0.0459036	0.0879518	0.131325	0.137711		0.0109639	0.0577108	0.093494	0.142289	0.138313	420	431	0.0013253	-0.0118072	-0.00554217	-0.0109639	-0.00060241	420	431	0.0060241	0.00542169	0.0053012	0.00301205	0.0046988	0.00240964	0.00240964	0.00204819	0.0046988	0.00879518						0.013253	-0.118072	-0.0554217	-0.109639	-0.0060241	0.353797	-3.44692	-1.68909	-3.40241
426	441		1834.05	14	8.43-8.49	0.0229776	0.082358	0.19062	0.333046	0.452151		0.0240964	0.0959552	0.201205	0.353787	0.460757	426	441	-0.00111876	-0.0135972	-0.0105852	-0.0207401	-0.00860585	426	441	0.00292599	0.00963855	0.00576592	0.00800344	0.00473322	0.00464716	0.00430293	0.00757315	0.00929432	0.0314974						-0.0156627	-0.190361	-0.148193	-0.290361	-0.120482	-0.352858	-2.23119	-1.92619	-2.92881
432	441		1145.63	8	10.71-10.77	0.0183735	0.0278614	0.0786145	0.101807	0.112048		0.0158133	0.0287651	0.0784639	0.103916	0.109789	432	441	0.00256024	-0.000903614	0.000150602	-0.00210843	0.00225904	432	441	0.00225904	0.00466867	0.000903614	0.00180723	0.00150602	0.00165663	0.00587349	0.00165663	0.00331325	0.00933735						0.0204819	-0.00722892	0.00120482	-0.0168675	0.0180723	1.58297	-0.208598	0.138233	-0.967629
441	447		823.386	5	10.06-10.11	0.232048	0.427952	0.585301	0.669398	0.806265		0.208193	0.45012	0.598795	0.70506	0.81012	441	447	0.0238554	-0.0221687	-0.013494	-0.0356627	-0.00385542	441	447	0.026988	0.0228916	0.0161446	0.0026506	0.0120482	0.0122892	0.0187952	0.0228916	0.0144578	0.0477108						0.119277	-0.110843	-0.0674699	-0.178313	-0.0192771	1.39335	-1.29637	-0.834366	-4.20235
[truncated: 7 more columns]

## Sheet: UVRAG_deuteration_table
				Date:			-		SD	0.0105727																														for STDEV	Threshold Value=		0.3
Global Color scale				Experiment date:			-			-0.00749854																															Threshold percent		0.05
0.1	0.35	0.7		Sample:			HSUVRAG_FL											-0.1	-0.05	0.05	0.1																				t-threshold		2.776
				Instrument:			Waters Synapt G2 Si
																										STDEVS					STDEVS
		Max Frac Deut		0.83		a	ComplexII_rab5					b	ComplexII_solo						a-b differences							a	ComplexII_rab5				b	ComplexII_solo									Differences in Daltons (Differences >+/- 0.5Da Highlighted					t-test	*=assumes triplicate values, a p=0.05 test
Start	End	Mod	m/z	#D	RT	0.3	3	30	300	3000		0.3	3	30	300	3000	Start	End	0.3	3	30	300	3000	Start	End	0.3	3	30	300	3000	0.3	3	30	300	3000						0.005	0.05	0.5	5	50	0.005	0.05	0.5	5
11	19		858.46	3	9.58-9.64	0.0220884	0.0116466	0.0333333	0.02249	0.0558233		0.00120482	0.0120482	0.0208835	0.02249	0.0297189	11	19	0.0208835	-0.000401606	0.0124498	0	0.0261044	11	19	0.0176707	0.00963855	0.0128514	0.0176707	0.0200803	0.00722892	0.0128514	0.00281124	0.0136546	0.0200803						0.0626506	-0.00120482	0.0373494	0	0.0783133	1.89457	-0.0433013	1.63916	0
15	25		943.513	6	8.51-8.60	0.00120482	0.00742972	0.00502008	0.00542169	0.0158635		0.00160643	0.00361446	0.00542169	0.00502008	0.0100402	15	25	-0.000401606	0.00381526	-0.000401606	0.000401606	0.00582329	15	25	0.00100402	0.00261044	0.00301205	0.00441767	0.00120482	0.00301205	0.00120482	0.000803213	0.00220884	0.00200803						-0.00240964	0.0228916	-0.00240964	0.00240964	0.0349398	-0.219089	2.29846	-0.223142	0.140836
28	50		2704.56	20	6.55-6.62	0.0807831	0.148614	0.208735	0.258012	0.32741		0.0651807	0.154759	0.219518	0.279699	0.338494	28	50	0.0156024	-0.00614458	-0.0107831	-0.0216867	-0.0110843	28	50	0.00963855	0.00843373	0.0039759	0.00548193	0.00349398	0.00349398	0.00680723	0.00789157	0.00927711	0.0224096						0.312048	-0.122892	-0.215663	-0.433735	-0.221687	2.63591	-0.981965	-2.1136	-3.48585
28	52		2974.7	22	6.38-6.48	0.0622125	0.128149	0.191347	0.22897	0.3046		0.0577218	0.143593	0.204491	0.256736	0.321906	28	52	0.00449069	-0.0154436	-0.0131435	-0.0277656	-0.0173056	28	52	0.00777656	0.011172	0.00470975	0.00569551	0.00279299	0.00553122	0.00717415	0.00700986	0.00690033	0.0242059						0.0987952	-0.339759	-0.289157	-0.610843	-0.380723	0.815057	-2.01468	-2.69567	-5.37499
29	49		2562.48	18	6.14-6.58	0.0831995	0.15656	0.204685	0.239558	0.311714		0.0655957	0.147858	0.212517	0.271954	0.335475	29	49	0.0176037	0.00870147	-0.00783133	-0.0323963	-0.0237617	29	49	0.0172021	0.0169344	0.00809906	0.00809906	0.00776439	0.0125167	0.00421687	0.00662651	0.0119143	0.0246319						0.316867	0.156627	-0.140964	-0.583133	-0.427711	1.43323	0.863614	-1.29622	-3.89492
32	52		2563.44	18	5.93-6.02	0.0129183	0.0514056	0.112918	0.160375	0.258501		0.014257	0.0708835	0.126774	0.181459	0.266734	32	52	-0.00133869	-0.0194779	-0.0138554	-0.0210843	-0.00823293	32	52	0.00127175	0.00508701	0.00555556	0.00247657	0.00060241	0.00495315	0.0154618	0.00414993	0.00555556	0.0259036						-0.0240964	-0.350602	-0.249398	-0.379518	-0.148193	-0.453415	-2.07264	-3.46075	-6.0039
36	52		2085.19	15	4.93-5.06	0.0037751	0.015743	0.0459438	0.0908434	0.195502		0.00409639	0.0190361	0.0551004	0.0967068	0.202731	36	52	-0.000321285	-0.00329317	-0.00915663	-0.00586345	-0.00722892	36	52	0.00104418	0.0015261	0.00409639	0.00120482	0.00273092	0.00232932	0.00216867	0.00208835	0.000562249	0.0124498						-0.00481928	-0.0493976	-0.137349	-0.0879518	-0.108434	-0.218002	-2.15095	-3.44927	-7.6385
47	55		983.551	7	5.07-5.13	0.00154905	0.0228916	0.101377	0.130809	0.134596		0.000344234	0.0376936	0.12031	0.131325	0.128227	47	55	0.00120482	-0.0148021	-0.0189329	-0.000516351	0.00636833	47	55	0.00189329	0.00877797	0.00395869	0.00516351	0.00258176	0.00447504	0.00654045	0.0175559	0.00464716	0.00567986						0.00843373	-0.103614	-0.13253	-0.00361446	0.0445783	0.429467	-2.34207	-1.82215	-0.128742
50	64		1719.91	13	6.44-6.49	0.105561	0.195181	0.221409	0.237905	0.252919		0.094532	0.208156	0.226969	0.257183	0.255514	50	64	0.0110287	-0.012975	-0.0055607	-0.0192771	-0.002595	50	64	0.0104727	0.0191844	0.00880445	0.0034291	0.00111214	0.0126043	0.0171455	0.0150139	0.0102873	0.0202039						0.143373	-0.168675	-0.0722892	-0.250602	-0.0337349	1.16568	-0.873443	-0.55337	-3.07909
53	64		1378.73	10	6.47-6.58	0.131687	0.232048	0.269036	0.280241	0.294096		0.114458	0.25241	0.270964	0.310964	0.30494	53	64	0.0172289	-0.0203614	-0.00192771	-0.0307229	-0.0108434	53	64	0.0162651	0.0273494	0.0104819	0.00879518	0.0073494	0.013253	0.0193976	0.013012	0.0136145	0.0277108						0.172289	-0.203614	-0.0192771	-0.307229	-0.108434	1.42232	-1.05181	-0.199828	-3.28311
53	65		1541.8	11	7.62-7.70	0.106791	0.189704	0.214239	0.228149	0.240416		0.0895947	0.200767	0.216539	0.249288	0.244359	53	65	0.0171961	-0.0110624	-0.00230011	-0.0211391	-0.00394304	53	65	0.0138007	0.0174151	0.00591457	0.0094195	0.0109529	0.0124863	0.0157722	0.0105148	0.0182913	0.0203724						0.189157	-0.121687	-0.0253012	-0.23253	-0.0433735	1.60038	-0.815498	-0.330228	-1.7796
53	66		1688.86	12	9.79-9.97	0.113353	0.113755	0.189759	0.180522	0.221185		0.113353	0.141466	0.173092	0.20492	0.224197	53	66	0	-0.0277108	0.0166667	-0.0243976	-0.00301205	53	66	0.00692771	0.0123494	0.0105422	0.0166667	0.00903614	0.0064257	0.0125502	0.0203815	0.0183735	0.0329317						0	-0.33253	0.2	-0.292771	-0.0361446	0	-2.72596	1.25803	-1.7035
71	80		1246.59	8	7.85-7.92	0.144127	0.442169	0.589759	0.632681	0.644277		0.12259	0.484036	0.624096	0.66762	0.651355	71	80	0.0215361	-0.0418675	-0.0343373	-0.0349398	-0.00707831	71	80	0.0144578	0.0222892	0.00858434	0.00512048	0.0105422	0.0192771	0.014006	0.0150602	0.0121988	0.0171687						0.172289	-0.33494	-0.274699	-0.279518	-0.0566265	1.54802	-2.75473	-3.43087	-4.5743
80	94		1852.95	12	9.22-9.32	0.0215863	0.0585341	0.142972	0.250502	0.375301		0.00662651	0.0546185	0.146787	0.253213	0.381526	80	94	0.0149598	0.00391566	-0.00381526	-0.00271084	-0.0062249	80	94	0.00662651	0.0139558	0.00983936	0.0115462	0.0163655	0.000301205	0.0190763	0.0182731	0.00813253	0.0259036						0.179518	0.046988	-0.0457831	-0.0325301	-0.0746988	3.9062	0.286938	-0.318411	-0.332465
80	98		2324.19	16	8.85-8.94	0.03125	0.101732	0.208584	0.345708	0.446235		0.0259789	0.100075	0.21506	0.372063	0.467244	80	98	0.00527108	0.00165663	-0.0064759	-0.0263554	-0.021009	80	98	0.00353916	0.0140813	0.00700301	0.0059488	0.000225904	0.00399096	0.0064006	0.00715361	0.00436747	0.0307982						0.0843373	0.026506	-0.103614	-0.421687	-0.336145	1.71156	0.185506	-1.12045	-6.18557
80	99		2471.26	17	10.20-10.25	0.0387668	0.1163	0.226577	0.352303	0.444366		0.0315379	0.122183	0.225656	0.37888	0.473281	80	99	0.00722892	-0.00588235	0.000921332	-0.0265769	-0.0289157	80	99	0.00248051	0.0109142	0.0112686	0.00474841	0.00347271	0.00198441	0.00729979	0.0111269	0.0080085	0.0120482						0.122892	-0.1	0.0156627	-0.451807	-0.491566	3.94158	-0.775949	0.100768	-4.94421
81	94		1705.88	11	8.74-8.81	0.00175246	0.0345016	0.0989047	0.189923	0.326177		0.00460022	0.0375685	0.106681	0.213582	0.364074	81	94	-0.00284775	-0.00306681	-0.00777656	-0.0236583	-0.037897	81	94	0.00120482	0.00503834	0.00240964	0.00109529	0.00317634	0.00186199	0.00219058	0.00306681	0.00777656	0.00120482						-0.0313253	-0.0337349	-0.0855422	-0.260241	-0.416867	-2.22404	-0.966859	-3.4535	-5.21784
81	99		2324.19	16	9.96-10.04	0.0338102	0.113404	0.210994	0.331627	0.423569		0.0295934	0.11747	0.21122	0.355572	0.441867	81	99	0.00421687	-0.00406627	-0.000225904	-0.0239458	-0.0182982	81	99	0.00459337	0.0111446	0.0064759	0.00572289	0.00391566	0.00353916	0.0064759	0.00903614	0.00707831	0.0184488						0.0674699	-0.0650602	-0.00361446	-0.383133	-0.292771	1.25957	-0.546412	-0.035196	-4.55652
84	99		1917.99	13	10.37-10.41	0.0441149	0.137071	0.227062	0.326413	0.424467		0.042076	0.150139	0.236701	0.359963	0.451715	84	99	0.00203892	-0.0130677	-0.00963855	-0.0335496	-0.0272475	84	99	0.00463392	0.0094532	0.00806302	0.0101019	0.00120482	0.00157553	0.00732159	0.00695088	0.00750695	0.026228						0.026506	-0.16988	-0.125301	-0.436145	-0.354217	0.721538	-1.89294	-1.56822	-4.61706
99	106		947.49	5	10.26-10.32	0.166265	0.44988	0.630361	0.673976	0.673253		0.141928	0.483373	0.642651	0.716145	0.710361	99	106	0.0243373	-0.033494	-0.0122892	-0.0421687	-0.0371084	99	106	0.0192771	0.0349398	0.020241	0.0103614	0.00578313	0.0240964	0.0296386	0.019759	0.0115663	0.00819277						0.121687	-0.16747	-0.0614458	-0.210843	-0.185542	1.36603	-1.26619	-0.752499	-4.70346
100	112		1392.64	10	8.71-8.78	0.143133	0.379518	0.546988	0.690843	0.74012		0.103855	0.376867	0.55747	0.717711	0.776867	100	112	0.0392771	0.0026506	-0.0104819	-0.0268675	-0.036747	100	112	0.0140964	0.0239759	0.00795181	0.0183133	0.0046988	0.00807229	0.0250602	0.0260241	0.0163855	0.0140964						0.392771	0.026506	-0.104819	-0.268675	-0.36747	4.18799	0.132372	-0.667181	-1.89373
103	112		1091.49	8	6.88-6.97	0.0314759	0.119277	0.194277	0.279066	0.287048		0.035994	0.138705	0.215512	0.281928	0.285241	103	112	-0.00451807	-0.0194277	-0.0212349	-0.00286145	0.00180723	103	112	0.0129518	0.00496988	0.0120482	0.00993976	0.00798193	0.0063253	0.00722892	0.0302711	0.00798193	0.0167169						-0.0361446	-0.155422	-0.16988	-0.0228916	0.0144578	-0.542918	-3.83582	-1.12889	-0.388782
107	113		757.295	5	9.18-9.31	0.0214458	0.163855	0.313735	0.566747	0.637108		0.0296386	0.166988	0.321205	0.580964	0.659518	107	113	-0.00819277	-0.00313253	-0.00746988	-0.0142169	-0.0224096	107	113	0.0175904	0.0118072	0.0154217	0.0146988	0.0214458	0.00554217	0.00650602	0.00963855	0.00819277	0.00746988						-0.0409639	-0.0156627	-0.0373494	-0.0710843	-0.112048	-0.769422	-0.402468	-0.711438	-1.46331
113	124		1388.78	10	9.68-9.73	0.0259036	0.0748193	0.15	0.195904	0.201205		0.0249398	0.0848193	0.156145	0.216265	0.206867	113	124	0.000963855	-0.01	-0.00614458	-0.0203614	-0.00566265	113	124	0.00445783	0.00843373	0.00481928	0.00493976	0.00060241	0.00253012	0.00710843	0.00674699	0.00650602	0.0128916						0.00963855	-0.1	-0.0614458	-0.203614	-0.0566265	0.325695	-1.57033	-1.28359	-4.31728
113	127		1792.99	13	10.58-10.62	0.021316	0.084152	0.232252	0.295644	0.306673		0.0212234	0.0974977	0.250695	0.320482	0.326506	113	127	9.26784e-05	-0.0133457	-0.018443	-0.0248378	-0.0198332	113	127	0.00278035	0.00611677	0.00769231	0.0021316	0.00389249	0.002595	0.00491196	0.00769231	0.00593142	0.000834106						0.00120482	-0.173494	-0.239759	-0.322892	-0.257831	0.0422075	-2.94656	-2.93644	-6.82558
113	128		1906.07	14	11.56-11.62	0.0202238	0.0765921	0.211015	0.274096	0.288382		0.0186747	0.0870052	0.228657	0.296902	0.311188	113	128	0.00154905	-0.0104131	-0.017642	-0.0228055	-0.0228055	113	128	0.00283993	0.00757315	0.0154905	0.00335628	0.000774527	0.00240964	0.00499139	0.00903614	0.00748709	0.00387263						0.0216867	-0.145783	-0.246988	-0.319277	-0.319277	0.720384	-1.98851	-1.7039	-4.8142
114	124		1241.71	9	8.25-8.32	0.0337349	0.0935743	0.18581	0.236948	0.243373		0.0313253	0.103614	0.187952	0.24913	0.251138	114	124	0.00240964	-0.0100402	-0.0021419	-0.0121821	-0.00776439	114	124	0.00441767	0.0109772	0.00722892	0.00776439	0.00147256	0.0038822	0.0107095	0.00575636	0.010174	0.00495315						0.0216867	-0.0903614	-0.0192771	-0.109639	-0.0698795	0.709667	-1.13394	-0.401466	-1.64865
114	127		1645.92	12	9.72-9.78	0.0262048	0.0972892	0.261747	0.33253	0.344277		0.0231928	0.110341	0.277912	0.357028	0.363956	114	127	0.00301205	-0.0130522	-0.0161647	-0.024498	-0.0196787	114	127	0.00411647	0.00913655	0.00552209	0.00481928	0.00321285	0.00481928	0.0063253	0.00923695	0.00923695	0.00160643						0.0361446	-0.156627	-0.193976	-0.293976	-0.236145	0.823129	-2.0344	-2.60163	-4.0727
114	128		1759	13	10.96-11.02	0.0242817	0.0911956	0.24912	0.31316	0.326135		0.0208526	0.103058	0.263855	0.338462	0.341613	114	128	0.0034291	-0.0118628	-0.0147359	-0.0253012	-0.0154773	114	128	0.00287303	0.00787766	0.00917516	0.00361446	0.002595	0.00222428	0.00352178	0.00898981	0.00611677	0.0109361						0.0445783	-0.154217	-0.191566	-0.328916	-0.201205	1.63465	-2.38115	-1.98698	-6.16802
118	126		1093.52	7	10.68-10.73	0.00946644	0.0111876	0.0070568	0.0297762	0.132358		0.00636833	0.00516351	0.0091222	0.0375215	0.137005	118	126	0.00309811	0.0060241	-0.0020654	-0.00774527	-0.00464716	118	126	0.0020654	0.00757315	0.00567986	0.0134251	0.00240964	0.00774527	0.00464716	0.00654045	0.00413081	0.0134251						0.0216867	0.0421687	-0.0144578	-0.0542169	-0.0325301	0.669427	1.1743	-0.412975	-0.955072
128	135		1002.56	6	11.51-11.55	0.00060241	-0.00240964	0.0064257	0.0218876	0.163655		-0.000803213	-0.00341365	-0.00281124	0.0206827	0.161245	128	135	0.00140562	0.00100402	0.00923695	0.00120482	0.00240964	128	135	0.00120482	0.0064257	0.00200803	0.00321285	0.00240964	0.00321285	0.00301205	0.00702811	0.00763052	0.0100402						0.00843373	0.0060241	0.0554217	0.00722892	0.0144578	0.709524	0.245047	2.18882	0.25205
136	155		2356.23	18	9.72-9.81	0.077577	0.191767	0.278715	0.315663	0.385475		0.0746319	0.208367	0.274431	0.334203	0.392637	136	155	0.00294511	-0.0165997	0.0042838	-0.0185408	-0.00716198	136	155	0.00582329	0.0165328	0.0153949	0.00682731	0.0194779	0.008166	0.00709505	0.0124498	0.0139224	0.0269076						0.053012	-0.298795	0.0771084	-0.333735	-0.128916	0.5086	-1.59812	0.374754	-2.07101
139	152		1697.86	12	5.15-5.22	0.100803	0.240964	0.346285	0.380622	0.454016		0.0777108	0.255823	0.344277	0.408333	0.469277	139	152	0.0230924	-0.0148594	0.00200803	-0.0277108	-0.015261	139	152	0.00873494	0.0172691	0.0126506	0.00883534	0.00431727	0.0115462	0.0179719	0.0178715	0.015261	0.0376506						0.277108	-0.178313	0.0240964	-0.33253	-0.183133	2.76261	-1.03263	0.158844	-2.7218
153	161		1010.51	7	11.23-11.26	0.0387263	0.0967298	0.149914	0.184509	0.20654		0.0351119	0.106196	0.148193	0.20327	0.209639	153	161	0.00361446	-0.00946644	0.00172117	-0.0187608	-0.00309811	153	161	0.00654045	0.0141136	0.00550775	0.00499139	0.00361446	0.00378657	0.00998279	0.00791738	0.0106713	0.0165232						0.0253012	-0.0662651	0.0120482	-0.131325	-0.0216867	0.828374	-0.948464	0.309098	-2.75824
153	174		2432.14	19	10.41-10.46	0.139632	0.172543	0.20279	0.226379	0.250095		0.112302	0.184781	0.204249	0.251237	0.2539	153	174	0.0273304	-0.0122384	-0.00145847	-0.0248573	-0.00380469	153	174	0.0295498	0.0162968	0.00938491	0.00735574	0.00526316	0.0113507	0.0124287	0.00583386	0.00963855	0.0202283						0.519277	-0.23253	-0.0277108	-0.472289	-0.0722892	1.49543	-1.03427	-0.228602	-3.55094
155	179		2789.34	22	10.34-10.39	0.209967	0.288992	0.338828	0.36391	0.391073		0.178149	0.312815	0.345838	0.397755	0.392771	155	179	0.0318182	-0.0238226	-0.00700986	-0.0338445	-0.0016977	155	179	0.0213582	0.0171413	0.0101314	0.00826944	0.00224535	0.0204272	0.0217963	0.0136364	0.00909091	0.0256846						0.7	-0.524096	-0.154217	-0.744578	-0.0373494	1.86474	-1.48804	-0.714701	-4.77001
156	174		2058.91	16	8.41-8.49	0.179142	0.217846	0.257304	0.280346	0.31619		0.147289	0.233434	0.26122	0.317395	0.318825	156	174	0.0318524	-0.0155873	-0.00391566	-0.0370482	-0.00263554	156	174	0.0177711	0.0201054	0.0111446	0.0061747	0.0059488	0.0174699	0.0179217	0.00722892	0.0107681	0.024247						0.509639	-0.249398	-0.0626506	-0.592771	-0.0421687	2.21388	-1.0024	-0.510557	-5.1696
156	179		2642.28	21	8.91-8.98	0.22599	0.317154	0.368617	0.398738	0.423867		0.191509	0.332186	0.374068	0.432129	0.432129	156	179	0.0344808	-0.0150316	-0.00545037	-0.0333907	-0.00826162	156	179	0.026506	0.0255307	0.00877797	0.00774527	0.00447504	0.0183018	0.0184739	0.0138267	0.0109007	0.0263339						0.724096	-0.315663	-0.114458	-0.701205	-0.173494	1.85412	-0.826167	-0.576411	-4.32498
159	174		1774.76	13	7.94-7.99	0.201761	0.244022	0.256163	0.272289	0.301297		0.175904	0.255329	0.264411	0.314458	0.317794	159	174	0.0258573	-0.0113068	-0.00824838	-0.0421687	-0.0164968	159	174	0.0173309	0.018443	0.0130677	0.002595	0.00954588	0.0230769	0.0166821	0.0143652	0.0060241	0.0227989						0.336145	-0.146988	-0.107229	-0.548193	-0.214458	1.55184	-0.787501	-0.73568	-11.1352
159	179		2358.13	18	8.63-8.72	0.252276	0.345649	0.392369	0.413855	0.441031		0.217068	0.367604	0.400134	0.449732	0.459103	159	179	0.0352075	-0.0219545	-0.00776439	-0.0358768	-0.0180723	159	179	0.0259036	0.0296519	0.00789826	0.00977242	0.00495315	0.0201473	0.022423	0.0178046	0.0144578	0.0137885						0.633735	-0.395181	-0.139759	-0.645783	-0.325301	1.85826	-1.02288	-0.690444	-3.56091
162	179		2023.02	15	7.75-7.83	0.302892	0.407149	0.466988	0.487631	0.503534		0.252289	0.423293	0.463695	0.524578	0.509157	162	179	0.0506024	-0.0161446	0.00329317	-0.0369478	-0.00562249	162	179	0.0326908	0.0300402	0.0115663	0.0107631	0.0064257	0.0221687	0.0286747	0.0200803	0.00795181	0.0335743						0.759036	-0.242169	0.0493976	-0.554217	-0.0843373	2.21897	-0.673344	0.246144	-4.78225
166	172		866.392	5	4.96-5.03	0.0628916	0.0990361	0.117108	0.211807	0.426747		0.033012	0.08	0.0908434	0.233253	0.447952	166	172	0.0298795	0.0190361	0.0262651	-0.0214458	-0.0212048	166	172	0.0183133	0.0137349	0.0101205	0.013012	0.0120482	0.0110843	0.0144578	0.00313253	0.00771084	0.0144578						0.149398	0.0951807	0.131325	-0.107229	-0.106024	2.41762	1.65339	4.29409	-2.45585
181	194		1685.75	12	9.58-9.63	0.0790161	0.217972	0.321486	0.427711	0.522189		0.0752008	0.238655	0.327209	0.463956	0.548795	181	194	0.00381526	-0.0206827	-0.00572289	-0.036245	-0.0266064	181	194	0.0105422	0.0184739	0.0116466	0.00401606	0.00582329	0.00863454	0.0173695	0.0153614	0.012249	0.00371486						0.0457831	-0.248193	-0.0686747	-0.43494	-0.319277	0.48494	-1.41276	-0.514196	-4.87008
187	194		998.482	6	9.22-9.30	0.00943775	0.0305221	0.064257	0.177912	0.278313		0.00722892	0.0329317	0.0676707	0.195382	0.288554	187	194	0.00220884	-0.00240964	-0.00341365	-0.0174699	-0.010241	187	194	0.00140562	0.00522088	0.00421687	0.00120482	0.00240964	0.00100402	0.00461847	0.00401606	0.00180723	0.0230924						0.013253	-0.0144578	-0.0204819	-0.104819	-0.0614458	2.21481	-0.598754	-1.01534	-13.9311
198	205		953.498	6	3.89-3.93	-0.0136546	-0.0110442	-0.00843373	0.00220884	0.11004		-0.000803213	0.00421687	0.00883534	0.0210843	0.128514	198	205	-0.0128514	-0.015261	-0.0172691	-0.0188755	-0.0184739	198	205	0.00461847	0.00763052	0.00662651	0.00923695	0.00682731	0.0108434	0.00783133	0.00522088	0.0216867	0.00682731						-0.0771084	-0.0915663	-0.103614	-0.113253	-0.110843	-1.88863	-2.41747	-3.54558	-1.38696
198	206		1066.58	7	4.80-4.84	-0.00860585	-0.00826162	0.00275387	0.0115318	0.0889845		-0.00722892	-0.00981067	-0.00791738	0.00240964	0.0917384	198	206	-0.00137694	0.00154905	0.0106713	0.0091222	-0.00275387	198	206	0.00154905	0.00258176	0.0060241	0.0156627	0.00688468	0.00654045	0.0141136	0.0070568	0.00120482	0.00636833						-0.00963855	0.0108434	0.0746988	0.0638554	-0.0192771	-0.354826	0.187	1.99207	1.00581
205	211		786.46	5	5.06-5.10	0.00795181	0.00385542	0.0221687	0.093012	0.485301		-0.00168675	0.00819277	0.0260241	0.0961446	0.482169	205	211	0.00963855	-0.00433735	-0.00385542	-0.00313253	0.00313253	205	211	0.00506024	0.00192771	0.00240964	0.00409639	0.00313253	0.00457831	0.00650602	0.0151807	0.0192771	0.0303614						0.0481928	-0.0216867	-0.0192771	-0.0156627	0.0156627	2.44643	-1.10712	-0.434447	-0.275311
205	212		887.508	6	4.79-4.83	0.00261044	0.00160643	0.0236948	0.146988	0.544177		0.00983936	0.00341365	0.0277108	0.160643	0.551406	205	212	-0.00722892	-0.00180723	-0.00401606	-0.0136546	-0.00722892	205	212	0.00240964	0.00140562	0.00361446	0.00742972	0.00381526	0.00200803	0.00240964	0.00180723	0.0060241	0.0293173						-0.0433735	-0.0108434	-0.0240964	-0.0819277	-0.0433735	-3.99179	-1.12208	-1.72133	-2.47259
205	219		1669.97	13	5.66-5.75	0.00648749	0.00806302	0.018443	0.100463	0.414365		0.00231696	0.00546803	0.0168675	0.106117	0.422799	205	219	0.00417053	0.002595	0.00157553	-0.00565338	-0.00843373	205	219	0.000185357	0.00157553	0.00176089	0.00379981	0.00240964	0.000648749	0.00389249	0.00194625	0.00176089	0.0296571						0.0542169	0.0337349	0.0204819	-0.073494	-0.109639	10.7062	1.07035	1.03973	-2.3381
205	221		1912.1	15	7.25-7.34	0.00313253	0.00449799	0.0163855	0.0874699	0.372048		0.00666667	0.0064257	0.0230522	0.0984739	0.377912	205	221	-0.00353414	-0.00192771	-0.00666667	-0.011004	-0.00586345	205	221	0.00473896	0.0060241	0.00931727	0.00409639	0.0113253	0.00570281	0.00361446	0.00433735	0.0053012	0.0155823						-0.053012	-0.0289157	-0.1	-0.16506	-0.0879518	-0.825548	-0.475271	-1.12354	-2.84492
205	226		2551.51	20	10.23-10.31	0.00801205	0.0268072	0.055	0.141145	0.374096		0.00686747	0.0305422	0.0593373	0.151928	0.385361	205	226	0.00114458	-0.00373494	-0.00433735	-0.0107831	-0.0112651	205	226	0.000481928	0.00216867	0.000481928	0.00186747	0.0112048	0.000722892	0.00156627	0.00259036	0.00493976	0.0305422						0.0228916	-0.0746988	-0.086747	-0.215663	-0.225301	2.28183	-2.41824	-2.85125	-3.53665
206	212		816.471	5	4.63-4.66	0.00626506	0.00554217	0.0313253	0.169157	0.622651		0.00144578	0.00819277	0.0337349	0.194699	0.648193	206	212	0.00481928	-0.0026506	-0.00240964	-0.0255422	-0.0255422	206	212	0.0060241	0.000481928	0.00289157	0.00168675	0.00385542	0.00337349	0.00987952	0.00795181	0.00771084	0.02						0.0240964	-0.013253	-0.0120482	-0.127711	-0.127711	1.20898	-0.464145	-0.493264	-5.60488
206	219		1598.94	12	5.50-5.56	0.00461847	0.0062249	0.0166667	0.104016	0.433534		0.00381526	0.0061245	0.0202811	0.112952	0.48253	206	219	0.000803213	0.000100402	-0.00361446	-0.00893574	-0.048996	206	219	0.00281124	0.00220884	0.00381526	0.00120482	0.00200803	0.00120482	0.00160643	0.00140562	0.00471888	0.00993976						0.00963855	0.00120482	-0.0433735	-0.107229	-0.587952	0.454859	0.0636715	-1.53972	-3.1779
206	222		1970.1	15	7.36-7.44	0.00594378	0.00578313	0.0163855	0.0835341	0.30988		0.00506024	0.0075502	0.0175904	0.0819277	0.328434	206	222	0.000883534	-0.00176707	-0.00120482	0.00160643	-0.0185542	206	222	0.00257028	0.00128514	0.00425703	0.00787149	0.0150201	0.00232932	0.00216867	0.00104418	0.011245	0.0322892						0.013253	-0.026506	-0.0180723	0.0240964	-0.278313	0.441178	-1.21413	-0.476091	0.202707
206	226		2480.47	19	10.07-10.13	0.00837032	0.0298034	0.0593532	0.144959	0.365377		0.00640457	0.0312619	0.0606848	0.158339	0.367787	206	226	0.00196576	-0.00145847	-0.00133164	-0.0133798	-0.00240964	206	226	0.000443881	0.00304375	0.000634115	0.00424857	0.0125555	0.00228282	0.000951173	0.00234623	0.00202917	0.025428						0.0373494	-0.0277108	-0.0253012	-0.254217	-0.0457831	1.46407	-0.792162	-0.949006	-4.92208
212	219		901.523	6	4.45-4.48	0.00502008	0.00461847	0.0339357	0.110643	0.350402		0.00481928	0.0130522	0.0144578	0.0751004	0.380522	212	219	0.000200803	-0.00843373	0.0194779	0.0355422	-0.0301205	212	219	0.0180723	0.00361446	0.0232932	0.0194779	0.0140562	0.0158635	0.0204819	0.012249	0.00783133	0.0226908						0.00120482	-0.0506024	0.116867	0.213253	-0.180723	0.0144634	-0.702345	1.28191	2.9324
212	222		1272.69	9	6.00-6.04	0.0109772	0.00495315	0.0141901	0.0570281	0.248059		0.00535475	0.00709505	0.0151272	0.0609103	0.271754	212	222	0.00562249	-0.0021419	-0.000937082	-0.0038822	-0.0236948	212	222	0.00254351	0.00763052	0.00495315	0.000267738	0.00870147	0.00160643	0.00307898	0.0116466	0.000267738	0.0121821						0.0506024	-0.0192771	-0.00843373	-0.0349398	-0.213253	3.23716	-0.450868	-0.128244	-17.7588
212	226		1783.06	13	9.15-9.20	-0.00398517	0.0196478	0.0483781	0.143188	0.355422		0.0110287	0.0381835	0.0648749	0.172845	0.376923	212	226	-0.0150139	-0.0185357	-0.0164968	-0.0296571	-0.0215014	212	226	0.00917516	0.00518999	0.00426321	0.00834106	0.00583874	0.00398517	0.00898981	0.00481928	0.0136237	0.0266914						-0.195181	-0.240964	-0.214458	-0.385542	-0.279518	-2.59964	-3.09282	-4.44076	-3.21563
213	222		1171.64	8	5.64-5.70	-0.00150602	-0.00060241	0.0064759	0.0468373	0.172741		0.000150602	0.000150602	0.00737952	0.0399096	0.188253	213	222	-0.00165663	-0.000753012	-0.000903614	0.00692771	-0.015512	213	222	0.00286145	0.00225904	0.0120482	0.013253	0.00421687	0.00451807	0.00165663	0.00572289	0.00316265	0.0171687						-0.013253	-0.0060241	-0.00722892	0.0554217	-0.124096	-0.536532	-0.465578	-0.117339	0.880662
213	226		1682.01	12	8.36-8.46	0.0116466	0.0464859	0.0836345	0.158735	0.293976		0.00913655	0.053012	0.0886546	0.169679	0.303213	213	226	0.00251004	-0.0065261	-0.00502008	-0.0109438	-0.00923695	213	226	0.00160643	0.0064257	0.00291165	0.00291165	0.00431727	0.00150602	0.0106426	0.00170683	0.0065261	0.0223896						0.0301205	-0.0783133	-0.060241	-0.131325	-0.110843	1.97437	-0.909232	-2.57627	-2.65249
215	226		1454.88	10	7.67-7.75	0.0140964	0.0581928	0.0944578	0.167108	0.291807		0.0206024	0.053012	0.0987952	0.186747	0.33506	215	226	-0.00650602	0.00518072	-0.00433735	-0.0196386	-0.043253	215	226	0.00277108	0.00686747	0.0109639	0.0156627	0.0073494	0.0127711	0.0115663	0.0086747	0.00506024	0.0210843						-0.0650602	0.0518072	-0.0433735	-0.196386	-0.43253	-0.8623	0.667088	-0.537353	-2.06655
215	229		1744.01	13	5.08-5.16	-0.000370714	0.0115848	0.0531047	0.101668	0.229472		-0.00222428	0.0165894	0.0665431	0.11835	0.23392	215	229	0.00185357	-0.00500463	-0.0134384	-0.0166821	-0.00444856	215	229	0.00231696	0.00250232	0.00268767	0.00417053	0.00658017	0.00166821	0.000926784	0.00630213	0.00871177	0.0164968						0.0240964	-0.0650602	-0.174699	-0.216867	-0.0578313	1.12449	-3.24846	-3.3973	-2.99156
220	226		899.544	5	7.48-7.60	0.00915663	0.104578	0.201687	0.380723	0.564578		0.0207229	0.143614	0.233735	0.398554	0.57253	220	226	-0.0115663	-0.0390361	-0.0320482	-0.0178313	-0.00795181	220	226	0.00409639	0.00963855	0.00674699	0.0250602	0.0159036	0.0026506	0.0183133	0.0161446	0.0108434	0.0373494						-0.0578313	-0.195181	-0.160241	-0.0891566	-0.039759	-4.10591	-3.26712	-3.17237	-1.13108
233	241		1075.61	7	4.24-4.28	0.00895009	0.0091222	0.0567986	0.193976	0.406885		0.016179	0.0153184	0.057315	0.226678	0.471429	233	241	-0.00722892	-0.00619621	-0.000516351	-0.0327022	-0.0645439	233	241	0.0166954	0.00481928	0.0110155	0.0254733	0.00292599	0.00361446	0.0080895	0.0165232	0.0158348	0.0256454						-0.0506024	-0.0433735	-0.00361446	-0.228916	-0.451807	-0.732979	-1.13975	-0.045036	-1.88845
240	246		825.569	5	10.55-10.58	-0.00240964	-0.000240964	0.00144578	-0.0026506	0.0224096		0.000722892	0	0.000481928	0.00289157	0.0392771	240	246	-0.00313253	-0.000240964	0.000963855	-0.00554217	-0.0168675	240	246	0.00795181	0.000963855	0.0053012	0.00168675	0.00289157	0.00674699	0.0115663	0.00385542	0.00168675	0.00506024						-0.0156627	-0.00120482	0.00481928	-0.0277108	-0.0843373	-0.520278	-0.0359597	0.254686	-4.02416
240	247		938.653	6	11.31-11.36	0.00180723	-0.00200803	0.00240964	0.00662651	0.0598394		-0.000401606	-0.00261044	-0.00281124	0.00823293	0.0915663	240	247	0.00220884	0.00060241	0.00522088	-0.00160643	-0.0317269	240	247	0.00060241	0.00582329	0.00421687	0.00220884	0.00321285	0.00060241	0.00200803	0.00441767	0.00502008	0.0060241						0.013253	0.00361446	0.0313253	-0.00963855	-0.190361	4.49073	0.16939	1.48069	-0.507319
241	247		825.569	5	10.54-10.58	-0.0026506	-0.000722892	0.00144578	-0.00216867	0.0224096		0.000240964	-0.000722892	0.000240964	0.00192771	0.0383133	241	247	-0.00289157	0	0.00120482	-0.00409639	-0.0159036	241	247	0.00795181	0.00240964	0.0053012	0.00216867	0.00289157	0.00674699	0.0118072	0.00240964	0.00192771	0.00506024						-0.0144578	0	0.0060241	-0.0204819	-0.0795181	-0.480256	0	0.358364	-2.44526
242	250		1068.65	7	9.47-9.53	-0.000688468	0.00430293	0.0407917	0.12117	0.187091		-0.000172117	0.00636833	0.0433735	0.124269	0.188468	242	250	-0.000516351	-0.0020654	-0.00258176	-0.00309811	-0.00137694	242	250	0.00378657	0.00688468	0.00189329	0.00327022	0.00189329	0.0020654	0.00740103	0.00309811	0.00464716	0.0125645						-0.00361446	-0.0144578	-0.0180723	-0.0216867	-0.00963855	-0.207349	-0.353912	-1.23161	-0.944322
242	251		1181.74	8	10.52-10.57	-0.000451807	0.00903614	0.0414157	0.11988	0.182229		0.00316265	0.00692771	0.051506	0.134036	0.186747	242	251	-0.00361446	0.00210843	-0.0100904	-0.0141566	-0.00451807	242	251	0.00195783	0.00225904	0.00271084	0.0121988	0.00963855	0.00225904	0.00481928	0.00512048	0.00753012	0.0103916						-0.0289157	0.0168675	-0.0807229	-0.113253	-0.0361446	-2.09423	0.686132	-3.01651	-1.71041
245	251		827.475	5	9.52-9.55	0.0144578	0.0253012	0.0872289	0.230843	0.309157		-0.00457831	0.0127711	0.0886747	0.246988	0.309639	245	251	0.0190361	0.0125301	-0.00144578	-0.0161446	-0.000481928	245	251	0.0146988	0.0178313	0.0142169	0.00722892	0.0118072	0.0101205	0.0118072	0.00698795	0.0212048	0.0101205						0.0951807	0.0626506	-0.00722892	-0.0807229	-0.00240964	1.84756	1.01481	-0.158077	-1.24818
248	261		1697.92	12	5.13-5.20	0.0950803	0.241365	0.345582	0.382129	0.455823		0.0738956	0.251205	0.33494	0.404217	0.458434	248	261	0.0211847	-0.00983936	0.0106426	-0.0220884	-0.00261044	248	261	0.0113454	0.0223896	0.0108434	0.00732932	0.00893574	0.00732932	0.0201807	0.0148594	0.012249	0.0383534						0.254217	-0.118072	0.127711	-0.26506	-0.0313253	2.71661	-0.565395	1.00208	-2.6802
251	261		1326.77	9	4.07-4.11	0.00455154	0.00589023	0.0141901	0.0603748	0.249933		-0.000401606	0.000133869	0.00990629	0.0728246	0.283266	251	261	0.00495315	0.00575636	0.0042838	-0.0124498	-0.0333333	251	261	0.00133869	0.00307898	0.00174029	0.00160643	0.0038822	0.00187416	0.00187416	0.000937082	0.00535475	0.00174029						0.0445783	0.0518072	0.0385542	-0.112048	-0.3	3.72492	2.76605	3.7539	-3.85718
252	261		1213.69	8	3.77-3.82	0.00993976	0.00978916	0.0200301	0.0608434	0.248645		0.000753012	0.00165663	0.0111446	0.0739458	0.28238	252	261	0.00918675	0.00813253	0.00888554	-0.0131024	-0.0337349	252	261	0.00165663	0.00271084	0.00271084	0.00316265	0.00210843	0.000903614	0.00180723	0.00346386	0.00376506	0.00391566						0.073494	0.0650602	0.0710843	-0.104819	-0.26988	8.43219	4.32346	3.49895	-4.61531
252	263		1383.79	10	4.33-4.36	0.0114458	0.00975904	0.0198795	0.0703614	0.254699		0.00385542	0.00638554	0.0133735	0.0816867	0.271928	252	263	0.00759036	0.00337349	0.00650602	-0.0113253	-0.0172289	252	263	0.0060241	0.000722892	0.00879518	0.00746988	0.0013253	0.00216867	0.00590361	0.00253012	0.00650602	0.0261446						0.0759036	0.0337349	0.0650602	-0.113253	-0.172289	2.05338	0.982406	1.23131	-1.98023
262	272		1232.76	9	7.96-8.03	0.00107095	-0.00107095	0.0120482	0.0373494	0.251138		0.00374833	0.00508701	0.0172691	0.0655957	0.32838	262	272	-0.00267738	-0.00615797	-0.00522088	-0.0282463	-0.0772423	262	272	0.00455154	0.0042838	0.000803213	0.00334672	0.00709505	0.00655957	0.000133869	0.0115127	0.00321285	0.00696118						-0.0240964	-0.0554217	-0.046988	-0.254217	-0.695181	-0.58083	-2.48861	-0.78356	-10.5456
262	279		1966.1	16	7.77-7.83	0.00301205	0.0204066	0.100151	0.21634	0.379819		0.00587349	0.0508283	0.14134	0.279066	0.470256	262	279	-0.00286145	-0.0304217	-0.0411898	-0.0627259	-0.0904367	262	279	0.0135542	0.00504518	0.0060241	0.00835843	0.00737952	0.000978916	0.00384036	0.011747	0.00775602	0.00180723						-0.0457831	-0.486747	-0.659036	-1.00361	-1.44699	-0.364705	-8.31034	-5.40411	-9.52804
264	279		1795.99	14	7.14-7.18	0.0208262	0.0518933	0.146816	0.271945	0.428657		0.016179	0.0682444	0.175559	0.325473	0.507315	264	279	0.00464716	-0.0163511	-0.0287435	-0.0535284	-0.0786575	264	279	0.013167	0.010327	0.00903614	0.013253	0.0095525	0.00886403	0.0020654	0.0140275	0.0115318	0.00464716						0.0650602	-0.228916	-0.40241	-0.749398	-1.1012	0.507107	-2.68916	-2.98365	-5.27751
265	272		949.571	6	6.64-6.74	0	0.014257	0.015261	0.0383534	0.290361		0.0100402	0.00662651	0.00662651	0.0672691	0.362851	265	272	-0.0100402	0.00763052	0.00863454	-0.0289157	-0.07249	265	272	0.00381526	0.00200803	0.0140562	0.00963855	0.0154618	0.00582329	0.00361446	0.00562249	0.00682731	0.0285141						-0.060241	0.0457831	0.0518072	-0.173494	-0.43494	-2.49792	3.1964	0.987875	-4.24019
265	279		1682.91	13	6.83-6.91	0.00871177	0.0492122	0.146803	0.285264	0.453105		0.0102873	0.0653383	0.175348	0.333735	0.522892	265	279	-0.00157553	-0.016126	-0.0285449	-0.0484708	-0.0697868	265	279	0.000834106	0.00509731	0.0094532	0.00546803	0.00389249	0.0021316	0.00315107	0.0133457	0.0117702	0.00315107						-0.0204819	-0.209639	-0.371084	-0.63012	-0.907229	-1.19219	-4.6609	-3.0231	-6.4688
266	278		1422.76	11	4.86-4.92	0.0250821	0.0651698	0.16035	0.303395	0.506353		0.0175246	0.0757941	0.20011	0.375465	0.585542	266	278	0.0075575	-0.0106243	-0.039759	-0.0720701	-0.0791895	266	278	0.0117196	0.020701	0.0108434	0.00821468	0.0220153	0.000657174	0.00569551	0.00832421	0.0152245	0.00164294						0.0831325	-0.116867	-0.437349	-0.792771	-0.871084	1.11518	-0.857088	-5.03762	-7.21583
266	279		1569.83	12	6.63-6.71	0.0109438	0.0506024	0.157028	0.30502	0.476104		0.0114458	0.0693775	0.190763	0.359839	0.537952	266	279	-0.000502008	-0.0187751	-0.0337349	-0.0548193	-0.0618474	266	279	0.00210843	0.00532129	0.0110442	0.0109438	0.00592369	0.00341365	0.00381526	0.0146586	0.0140562	0.0160643						-0.0060241	-0.225301	-0.404819	-0.657831	-0.742169	-0.21671	-4.96655	-3.18363	-5.33002
273	279		751.35	5	5.98-6.06	0.0248193	0.118554	0.34241	0.547711	0.604819		0.0262651	0.151084	0.387952	0.598072	0.617831	273	279	-0.00144578	-0.0325301	-0.0455422	-0.0503614	-0.013012	273	279	0.00337349	0.0180723	0.00120482	0.0274699	0.0142169	0.00337349	0.0053012	0.0274699	0.0226506	0.0146988						-0.00722892	-0.162651	-0.227711	-0.251807	-0.0650602	-0.524891	-2.99164	-2.8688	-2.44997
275	286		1286.7	10	3.83-3.88	0.134458	0.18747	0.216506	0.243494	0.236627		0.123373	0.195301	0.224458	0.270843	0.252169	275	286	0.0110843	-0.00783133	-0.00795181	-0.0273494	-0.0155422	275	286	0.0303614	0.019759	0.0151807	0.023494	0.0177108	0.0126506	0.0140964	0.0225301	0.043494	0.0373494						0.110843	-0.0783133	-0.0795181	-0.273494	-0.155422	0.583695	-0.558845	-0.506968	-0.958264
276	283		804.34	6	4.32-4.36	0.0110442	0.0437751	0.0686747	0.0829317	0.166265		0.00803213	0.0447791	0.0674699	0.0913655	0.168273	276	283	0.00301205	-0.00100402	0.00120482	-0.00843373	-0.00200803	276	283	0.00261044	0.00542169	0.00341365	0.00120482	0.00361446	0.00261044	0.00281124	0.00281124	0.00843373	0.0146586						0.0180723	-0.0060241	0.00722892	-0.0506024	-0.0120482	1.41317	-0.284747	0.47189	-1.71464
280	286		796.444	5	6.62-6.69	0.00554217	0.0686747	0.343373	0.577349	0.584819		0.0115663	0.0761446	0.373976	0.631807	0.636867	280	286	-0.0060241	-0.00746988	-0.0306024	-0.0544578	-0.0520482	280	286	0.0106024	0.0113253	0.00674699	0.000240964	0.0166265	0.019759	0.0086747	0.0310843	0.00771084	0.00722892						-0.0301205	-0.0373494	-0.153012	-0.272289	-0.260241	-0.465309	-0.906939	-1.6664	-12.2266
283	293		1335.79	9	7.28-7.34	0.00361446	0.07751	0.317805	0.659438	0.734806		0.00334672	0.0895582	0.389023	0.735207	0.783668	283	293	0.000267738	-0.0120482	-0.0712182	-0.0757697	-0.0488621	283	293	0.00870147	0.0119143	0.0188755	0.00749665	0.00267738	0.00254351	0.00401606	0.0236948	0.0141901	0.0128514						0.00240964	-0.108434	-0.640964	-0.681928	-0.439759	0.0511533	-1.65976	-4.07188	-8.17746
293	307		1848.99	13	7.99-8.10	0.00185357	0.0068582	0.0308619	0.181557	0.461816		-0.00871177	0.00426321	0.0304912	0.183781	0.467285	293	307	0.0105653	0.002595	0.000370714	-0.00222428	-0.00546803	293	307	0.000741427	0.00407785	0.00630213	0.00333642	0.00991659	0.00305839	0.00417053	0.00583874	0.021316	0.0218721						0.137349	0.0337349	0.00481928	-0.0289157	-0.0710843	5.81501	0.770577	0.0747392	-0.178562
294	307		1735.9	12	7.12-7.18	-0.000200803	0.00120482	0.0355422	0.198594	0.464056		0.00160643	0.0062249	0.0412651	0.226305	0.49006	294	307	-0.00180723	-0.00502008	-0.00572289	-0.0277108	-0.026004	294	307	0.00411647	0.00421687	0.00351406	0.0060241	0.00572289	0.00291165	0.00421687	0.00542169	0.00552209	0.0390562						-0.0216867	-0.060241	-0.0686747	-0.33253	-0.312048	-0.620813	-1.45803	-1.5342	-5.87323
296	302		819.427	5	4.23-4.26	0.0026506	0.00746988	0.0918072	0.347229	0.579036		0.000481928	0.00915663	0.0833735	0.380482	0.593494	296	302	0.00216867	-0.00168675	0.00843373	-0.033253	-0.0144578	296	302	0.00746988	0.0173494	0.0190361	0.0224096	0.0166265	0.00385542	0.0159036	0.0113253	0.0110843	0.0387952						0.0108434	-0.00843373	0.0421687	-0.166265	-0.0722892	0.446846	-0.124132	0.659478	-2.30374
308	314		786.46	5	6.08-6.14	-0.00168675	0.00409639	0.0325301	0.222169	0.578554		-0.00313253	0.0053012	0.0412048	0.254458	0.588193	308	314	0.00144578	-0.00120482	-0.0086747	-0.0322892	-0.00963855	308	314	0.00385542	0.00361446	0.000963855	0.00289157	0.00626506	0.00240964	0.000481928	0.00506024	0.00313253	0.0380723						0.00722892	-0.0060241	-0.0433735	-0.161446	-0.0481928	0.550791	-0.572286	-2.91679	-13.1188
315	325		1330.74	9	9.62-9.66	-0.011245	-0.00749665	-0.00147256	0.04083	0.242169		-0.00709505	0.00414993	0.00174029	0.0543507	0.241232	315	325	-0.00414993	-0.0116466	-0.00321285	-0.0135207	0.000937082	315	325	0.00361446	0.00348059	0.00240964	0.00200803	0.00548862	0.00160643	0.0111111	0.0021419	0.0064257	0.0161981						-0.0373494	-0.104819	-0.0289157	-0.121687	0.00843373	-1.81725	-1.73251	-1.72607	-3.47862
319	325		857.497	5	9.37-9.42	0.000481928	-0.00361446	0.0156627	0.0561446	0.18988		0.000963855	-0.000240964	0.0101205	0.0638554	0.20241	319	325	-0.000481928	-0.00337349	0.00554217	-0.00771084	-0.0125301	319	325	0.00433735	0.00240964	0.00819277	0.00578313	0.00795181	0.00361446	0.00192771	0.00313253	0.00650602	0.00313253						-0.00240964	-0.0168675	0.0277108	-0.0385542	-0.0626506	-0.147844	-1.89351	1.09441	-1.53428
325	333		1095.59	6	12.27-12.34	0.00160643	0.0317269	0.165462	0.286345	0.326506		0.00441767	0.0383534	0.188153	0.324096	0.334337	325	333	-0.00281124	-0.00662651	-0.0226908	-0.037751	-0.00783133	325	333	0.00180723	0.00381526	0.015261	0.0108434	0.00180723	0.00200803	0.000401606	0.00763052	0.0118474	0.0218876						-0.0168675	-0.039759	-0.136145	-0.226506	-0.046988	-1.80239	-2.99177	-2.30341	-4.07127
325	335		1338.67	8	11.11-11.18	-0.0198795	0.00662651	0.126205	0.267319	0.317169		-0.0358434	0.0108434	0.132229	0.274398	0.318223	325	335	0.0159639	-0.00421687	-0.0060241	-0.00707831	-0.00105422	325	335	0.0131024	0.00948795	0.0150602	0.0131024	0.0161145	0.00436747	0.0111446	0.0173193	0.0103916	0.0304217						0.127711	-0.0337349	-0.0481928	-0.0566265	-0.00843373	2.00202	-0.49902	-0.454614	-0.733123
326	333		982.501	5	11.67-11.75	0.00433735	0.0337349	0.200241	0.345783	0.34988		0.00144578	0.0431325	0.22	0.371807	0.358313	326	333	0.00289157	-0.00939759	-0.019759	-0.0260241	-0.00843373	326	333	0.00216867	0.00385542	0.0086747	0.00385542	0.00313253	0.00144578	0.00481928	0.0125301	0.0053012	0.0228916						0.0144578	-0.046988	-0.0987952	-0.13012	-0.0421687	1.92154	-2.63738	-2.24566	-6.87652
327	333		895.469	4	11.74-11.82	0.00572289	0.0433735	0.250301	0.437651	0.442771		0.00753012	0.0569277	0.276205	0.474699	0.451506	327	333	-0.00180723	-0.0135542	-0.0259036	-0.0370482	-0.00873494	327	333	0.00301205	0.00813253	0.010241	0.00692771	0.00662651	0.00331325	0.00120482	0.0135542	0.00753012	0.0301205						-0.00722892	-0.0542169	-0.103614	-0.148193	-0.0349398	-0.699062	-2.85558	-2.64105	-6.27138
334	340		951.409	5	7.05-7.15	0.000722892	0.0262651	0.0339759	0.0546988	0.139036		-0.0086747	0.0219277	0.0318072	0.0496386	0.132048	334	340	0.00939759	0.00433735	0.00216867	0.00506024	0.00698795	334	340	0.00361446	0.00963855	0.00915663	0.00289157	0.00554217	0.00578313	0.00361446	0.00457831	0.00240964	0.0142169						0.046988	0.0216867	0.0108434	0.0253012	0.0349398	2.38676	0.729796	0.366914	2.32855
344	351		900.455	5	5.86-5.91	0.0383133	0.309157	0.386747	0.440482	0.451807		0.0272289	0.318795	0.371084	0.471566	0.46988	344	351	0.0110843	-0.00963855	0.0156627	-0.0310843	-0.0180723	344	351	0.00313253	0.0380723	0.0224096	0.0204819	0.0108434	0.00337349	0.0296386	0.0257831	0.0219277	0.0103614						0.0554217	-0.0481928	0.0783133	-0.155422	-0.0903614	4.17035	-0.346008	0.794141	-1.79432
353	361		903.43	7	4.87-4.92	0.162651	0.2642	0.343029	0.467986	0.561618		0.134768	0.271256	0.338382	0.497246	0.565921	353	361	0.027883	-0.0070568	0.00464716	-0.0292599	-0.00430293	353	361	0.0227194	0.0268503	0.0172117	0.0165232	0.0080895	0.0091222	0.0244406	0.0216867	0.0185886	0.0445783						0.195181	-0.0493976	0.0325301	-0.204819	-0.0301205	1.97263	-0.336639	0.290721	-2.03772
360	366		705.406	5	9.23-9.30	0.00385542	0.0453012	0.139518	0.228916	0.253735		-0.0120482	0.0349398	0.146506	0.262169	0.263373	360	366	0.0159036	0.0103614	-0.00698795	-0.033253	-0.00963855	360	366	0.0293976	0.0159036	0.0253012	0.0173494	0.0110843	0.0146988	0.0110843	0.00506024	0.0185542	0.0180723						0.0795181	0.0518072	-0.0349398	-0.166265	-0.0481928	0.838088	0.925784	-0.469086	-2.26738
363	370		844.444	6	8.51-8.60	0.00100402	0.00461847	0.00421687	0.00562249	0.00562249		0.00963855	0.010241	0.00742972	0.00843373	0.0114458	363	370	-0.00863454	-0.00562249	-0.00321285	-0.00281124	-0.00582329	363	370	0.00220884	0.00562249	0.00401606	0.00060241	0.000200803	0.00220884	0.00301205	0.00562249	0.00220884	0.00341365						-0.0518072	-0.0337349	-0.0192771	-0.0168675	-0.0349398	-4.78764	-1.52677	-0.805387	-2.12675
364	370		773.407	5	8.50-8.58	-0.00313253	-0.000722892	0.00554217	0.00192771	0.0086747		0.00168675	0.00722892	0.00433735	0.0115663	0.0142169	364	370	-0.00481928	-0.00795181	0.00120482	-0.00963855	-0.00554217	364	370	0.00481928	0.0144578	0.0060241	0.00506024	0.000481928	0.00337349	0.0060241	0.0086747	0.0101205	0.00795181						-0.0240964	-0.039759	0.0060241	-0.0481928	-0.0277108	-1.41895	-0.879349	0.197591	-1.47542
377	384		1034.59	5	9.73-9.82	0.00915663	0.0749398	0.283373	0.351807	0.423133		0.00337349	0.0754217	0.287952	0.372771	0.42241	377	384	0.00578313	-0.000481928	-0.00457831	-0.0209639	0.000722892	377	384	0.00674699	0.00819277	0.0086747	0.00746988	0.00698795	0.00120482	0.00144578	0.00843373	0.00578313	0.026747						0.0289157	-0.00240964	-0.0228916	-0.104819	0.00361446	1.4615	-0.100335	-0.655432	-3.84364
377	401		2923.6	21	7.96-8.08	0.0210557	0.0619621	0.153414	0.191566	0.254389		0.0187034	0.066724	0.155422	0.205967	0.257602	377	401	0.00235227	-0.0047619	-0.00200803	-0.0144005	-0.00321285	377	401	0.00263913	0.00430293	0.0080895	0.0047619	0.00344234	0.00315548	0.00493402	0.0091222	0.00487665	0.018187						0.0493976	-0.1	-0.0421687	-0.30241	-0.0674699	0.990423	-1.25984	-0.285261	-3.6594
393	410		2179.11	16	6.31-6.50	0.0256777	0.0281627	0.0549699	0.11747	0.194428		0.00873494	0.0278614	0.0513554	0.0993976	0.192846	393	410	0.0169428	0.000301205	0.00361446	0.0180723	0.00158133	393	410	0.0195783	0.00481928	0.00218373	0.0292169	0.00120482	0.00203313	0.00120482	0.00308735	0.00451807	0.0168675						0.271084	0.00481928	0.0578313	0.289157	0.0253012	1.49087	0.105021	1.6555	1.05879
404	422		2295.19	15	8.78-8.84	0.13004	0.268835	0.373655	0.425703	0.430843		0.0993574	0.283695	0.375743	0.454538	0.440803	404	422	0.0306827	-0.0148594	-0.00208835	-0.0288353	-0.00995984	404	422	0.00883534	0.0207229	0.0122088	0.013012	0.00514056	0.0118072	0.0158233	0.0156627	0.0113253	0.0338153						0.460241	-0.222892	-0.0313253	-0.43253	-0.149398	3.60372	-0.987115	-0.182142	-2.89526
406	422		2065.1	13	8.66-8.73	0.113716	0.271548	0.359592	0.417424	0.411214		0.0962002	0.266172	0.362187	0.433457	0.417053	406	422	0.0175162	0.00537535	-0.002595	-0.0160334	-0.00583874	406	422	0.00695088	0.0109361	0.0117702	0.0060241	0.0154773	0.0203892	0.0218721	0.0274328	0.0148285	0.0319741						0.227711	0.0698795	-0.0337349	-0.208434	-0.0759036	1.4084	0.380734	-0.150569	-1.73507
411	421		1228.68	8	6.78-6.87	0.0158133	0.0986446	0.210542	0.371837	0.558886		0.00256024	0.0923193	0.221837	0.428614	0.625301	411	421	0.013253	0.0063253	-0.0112952	-0.0567771	-0.0664157	411	421	0.00346386	0.00240964	0.00918675	0.00737952	0.00421687	0.00391566	0.00451807	0.00978916	0.0134036	0.00391566						0.106024	0.0506024	-0.0903614	-0.454217	-0.531325	4.39086	2.13959	-1.4573	-6.42717
421	427		890.381	5	9.92-9.98	0.00891566	0.0108434	0.033012	0.147229	0.202169		0.00578313	0.0060241	0.0373494	0.178795	0.20988	421	427	0.00313253	0.00481928	-0.00433735	-0.0315663	-0.00771084	421	427	0.00746988	0.00216867	0.00939759	0.0214458	0.00771084	0.0122892	0.00337349	0.0108434	0.00554217	0.0122892						0.0156627	0.0240964	-0.0216867	-0.157831	-0.0385542	0.377274	2.08138	-0.523557	-2.46833
428	436		1025.62	7	8.36-8.43	0.00464716	0.00395869	0.00464716	0.00395869	0.0060241		0.00361446	0.00550775	0.00619621	0.00671256	0.00671256	428	436	0.0010327	-0.00154905	-0.00154905	-0.00275387	-0.000688468	428	436	0.000516351	0.00189329	0.00172117	0.0020654	0.000860585	0.000344234	0.0020654	0.00189329	0.00120482	0.0010327						0.00722892	-0.0108434	-0.0108434	-0.0192771	-0.00481928	2.88231	-0.957591	-1.04859	-1.99481
429	436		912.539	6	7.57-7.65	0.00763052	0.00421687	0.00883534	0.00742972	0.00903614		0.00361446	0.00441767	0.00301205	0.00502008	0.00361446	429	436	0.00401606	-0.000200803	0.00582329	0.00240964	0.00542169	429	436	0.00261044	0.00200803	0.000803213	0.00140562	0.00381526	0.00240964	0.00100402	0.000803213	0.00140562	0.00321285						0.0240964	-0.00120482	0.0349398	0.0144578	0.0325301	1.95803	-0.154919	8.8794	2.09956
437	447		1255.63	8	7.35-7.42	0.197892	0.261596	0.286898	0.321084	0.378765		0.154819	0.251958	0.276205	0.336295	0.3875	437	447	0.0430723	0.00963855	0.0106928	-0.0152108	-0.00873494	437	447	0.0237952	0.0317771	0.0128012	0.014759	0.0061747	0.0188253	0.0271084	0.0165663	0.0129518	0.0277108						0.344578	0.0771084	0.0855422	-0.121687	-0.0698795	2.4588	0.399685	0.884625	-1.34171
438	448		1255.63	8	7.35-7.43	0.211295	0.251958	0.289608	0.325452	0.382831		0.154217	0.246687	0.271084	0.332078	0.37997	438	448	0.0570783	0.00527108	0.0185241	-0.00662651	0.00286145	438	448	0.0362952	0.0254518	0.0195783	0.0170181	0.00587349	0.00436747	0.0251506	0.0176205	0.0188253	0.0313253						0.456627	0.0421687	0.148193	-0.053012	0.0228916	2.70434	0.255151	1.2181	-0.452272
448	454		840.482	4	8.08-8.16	0.00451807	0.011747	0.0162651	0.0551205	0.327711		0.00361446	0.00783133	0.0141566	0.0701807	0.358133	448	454	0.000903614	0.00391566	0.00210843	-0.0150602	-0.0304217	448	454	0.00361446	0.00542169	0.00331325	0.000903614	0.00391566	0.0060241	0.00451807	0.00301205	0.00451807	0.0126506						0.00361446	0.0156627	0.00843373	-0.060241	-0.121687	0.222783	0.960988	0.815572	-5.66139
448	463		1927.98	13	10.57-10.62	0.0274328	0.097405	0.172289	0.248563	0.405839		0.0244671	0.104541	0.170621	0.264782	0.412141	448	463	0.00296571	-0.00713624	0.00166821	-0.0162187	-0.00630213	448	463	0.00352178	0.00991659	0.00667285	0.00759963	0.00222428	0.00417053	0.00667285	0.00722892	0.0121409	0.0344764						0.0385542	-0.0927711	0.0216867	-0.210843	-0.0819277	0.941041	-1.03411	0.293704	-1.96126
452	463		1429.68	10	10.55-10.61	0.0227711	0.0992771	0.178916	0.26988	0.403735		0.0260241	0.111084	0.194337	0.278313	0.398434	452	463	-0.00325301	-0.0118072	-0.0154217	-0.00843373	0.0053012	452	463	0.00674699	0.00915663	0.0115663	0.00289157	0.00975904	0.00927711	0.00301205	0.0136145	0.0203614	0.033253						-0.0325301	-0.118072	-0.154217	-0.0843373	0.053012	-0.49118	-2.1216	-1.49523	-0.710291
457	463		863.367	5	8.79-8.86	0.053012	0.201446	0.306988	0.337349	0.377349		0.0453012	0.213735	0.30747	0.361928	0.38241	457	463	0.00771084	-0.0122892	-0.000481928	-0.0245783	-0.00506024	457	463	0.00963855	0.0231325	0.013012	0.0120482	0.00674699	0.0060241	0.0118072	0.013253	0.00987952	0.0320482						0.0385542	-0.0614458	-0.00240964	-0.122892	-0.0253012	1.17502	-0.819566	-0.0449429	-2.73225
482	488		637.307	5	5.69-5.73	0.00481928	0.0481928	0.153012	0.163614	0.240964		-0.00168675	0.0448193	0.13253	0.171325	0.236867	482	488	0.00650602	0.00337349	0.0204819	-0.00771084	0.00409639	482	488	0.00240964	0.00746988	0.00481928	0.00795181	0.00168675	0.0053012	0.00192771	0.00819277	0.00409639	0.0166265						0.0325301	0.0168675	0.10241	-0.0385542	0.0204819	1.93516	0.757402	3.73228	-1.49309
487	502		1459.69	12	9.74-9.80	0.0332329	0.0741968	0.144177	0.190964	0.215663		0.0282129	0.0802209	0.153112	0.218072	0.223795	487	502	0.00502008	-0.0060241	-0.00893574	-0.0271084	-0.00813253	487	502	0.00401606	0.00913655	0.00180723	0.00291165	0.0062249	0.0061245	0.00773092	0.00502008	0.00702811	0.0159639						0.060241	-0.0722892	-0.107229	-0.325301	-0.0975904	1.18723	-0.871796	-2.9008	-6.17207
490	511		2282.15	18	5.71-5.78	0.257697	0.316399	0.348193	0.357564	0.363052		0.20656	0.322758	0.334404	0.383066	0.368474	490	511	0.0511379	-0.00635877	0.0137885	-0.025502	-0.00542169	490	511	0.0248996	0.0340027	0.0135207	0.0159304	0.00803213	0.0199465	0.0277108	0.0191432	0.0180723	0.0263052						0.920482	-0.114458	0.248193	-0.459036	-0.0975904	2.77627	-0.251086	1.01902	-1.83348
490	512		2411.19	19	5.78-5.85	0.257831	0.315853	0.34052	0.352315	0.355485		0.220101	0.318136	0.342105	0.376791	0.352061	490	512	0.0377299	-0.00228282	-0.00158529	-0.0244769	0.00342422	490	512	0.0265694	0.026189	0.0140774	0.00875079	0.0128091	0.0324033	0.0293595	0.0287888	0.0173748	0.0324667						0.716867	-0.0433735	-0.0301205	-0.46506	0.0650602	1.55953	-0.1005	-0.0856821	-2.17925
490	514		2680.38	21	6.15-6.21	0.246644	0.306713	0.341939	0.353873	0.356454		0.205852	0.320941	0.336431	0.380092	0.360011	490	514	0.0407917	-0.0142283	0.00550775	-0.0262192	-0.00355709	490	514	0.0291452	0.0300057	0.0136546	0.0137694	0.0087206	0.0200803	0.0269076	0.0158921	0.0162364	0.0329891						0.856627	-0.298795	0.115663	-0.550602	-0.0746988	1.99626	-0.611467	0.4553	-2.13318
491	514		2581.31	20	6.14-6.20	0.260904	0.320843	0.34753	0.349398	0.355964		0.220542	0.320301	0.332229	0.381988	0.351687	491	514	0.0403614	0.000542169	0.0153012	-0.0325904	0.00427711	491	514	0.0216867	0.029759	0.0177711	0.0203012	0.0143976	0.0208434	0.0262651	0.00945783	0.013494	0.0316265						0.807229	0.0108434	0.306024	-0.651807	0.0855422	2.32413	0.0236588	1.31649	-2.31566
492	502		1060.52	7	9.05-9.12	0.022031	0.0531842	0.0908778	0.105852	0.171084		0.0316695	0.0915663	0.0879518	0.130637	0.200516	492	502	-0.00963855	-0.0383821	0.00292599	-0.0247849	-0.029432	492	502	0.0253012	0.0223752	0.0129088	0.00998279	0.0182444	0.0123924	0.020654	0.0172117	0.00361446	0.0222031						-0.0674699	-0.268675	0.0204819	-0.173494	-0.206024	-0.592568	-2.1832	0.235559	-4.04339
512	534		2559.33	17	6.65-6.73	0.250744	0.314883	0.35528	0.355209	0.355067		0.207229	0.340751	0.363076	0.394259	0.36832	512	534	0.0435152	-0.0258682	-0.00779589	-0.0390503	-0.013253	512	534	0.034231	0.0256556	0.019348	0.00616584	0.0109142	0.0202693	0.0204819	0.0158044	0.016584	0.0275691						0.739759	-0.439759	-0.13253	-0.663855	-0.225301	1.89459	-1.36482	-0.540494	-3.8228
534	553		2137.06	18	8.58-8.72	0.0720884	0.186345	0.250803	0.297925	0.378849		0.0657965	0.193976	0.254351	0.319946	0.392704	534	553	0.00629183	-0.00763052	-0.00354752	-0.0220214	-0.0138554	534	553	0.00736278	0.00876841	0.00475234	0.0062249	0.000535475	0.00702811	0.0103079	0.0106426	0.00361446	0.0264391						0.113253	-0.137349	-0.0638554	-0.396386	-0.249398	1.07065	-0.976621	-0.527178	-5.29888
556	568		1536.78	11	5.03-5.09	0.310953	0.382804	0.416758	0.428916	0.447426		0.263965	0.38609	0.417415	0.458379	0.451369	556	568	0.046988	-0.00328587	-0.000657174	-0.0294633	-0.00394304	556	568	0.0396495	0.0375685	0.0116101	0.0189485	0.0119387	0.0285871	0.0382256	0.0186199	0.0125958	0.0463308						0.516867	-0.0361446	-0.00722892	-0.324096	-0.0433735	1.66499	-0.106188	-0.0518734	-2.24286
557	568		1421.75	10	4.39-4.45	0.290843	0.358313	0.381084	0.403735	0.398916		0.227349	0.366747	0.374578	0.425422	0.401928	557	568	0.063494	-0.00843373	0.00650602	-0.0216867	-0.00301205	557	568	0.0231325	0.0173494	0.0180723	0.0136145	0.0156627	0.0350602	0.0277108	0.0206024	0.0228916	0.039759						0.63494	-0.0843373	0.0650602	-0.216867	-0.0301205	2.6182	-0.4468	0.411185	-1.41032
578	601		2514.26	21	7.45-7.54	0.370052	0.466724	0.514917	0.547275	0.541136		0.303098	0.47969	0.503098	0.567527	0.538612	578	601	0.0669535	-0.0129662	0.0118187	-0.0202524	0.00252438	578	601	0.0383247	0.0425129	0.00963855	0.0211704	0.00866322	0.0278256	0.0376363	0.0313827	0.0196213	0.0498566						1.40602	-0.272289	0.248193	-0.425301	0.053012	2.44858	-0.395535	0.623543	-1.21526
682	691		1135.56	8	4.97-5.02	0.0957831	0.119277	0.125904	0.226355	0.362349		0.0426205	0.112349	0.13991	0.215813	0.328916	682	691	0.0531627	0.00692771	-0.014006	0.0105422	0.0334337	682	691	0.00903614	0.0358434	0.00331325	0.0106928	0.0131024	0.0138554	0.0305723	0.0371988	0.0361446	0.0286145						0.425301	0.0554217	-0.112048	0.0843373	0.26747	5.5666	0.254701	-0.649577	0.484428
686	699		1690.9	11	4.39-4.43	0.302738	0.383571	0.42563	0.440964	0.457065		0.247426	0.394195	0.424425	0.462541	0.456517	686	699	0.0553122	-0.0106243	0.00120482	-0.0215772	0.000547645	686	699	0.0328587	0.0290252	0.0167579	0.013034	0.0102957	0.0190581	0.0361446	0.0123768	0.0308872	0.0323111						0.608434	-0.116867	0.013253	-0.237349	0.0060241	2.5221	-0.396967	0.100168	-1.11479
690	699		1303.72	7	3.84-3.88	0.223064	0.307573	0.362651	0.376764	0.383133		0.186059	0.320138	0.355422	0.403614	0.388468	690	699	0.0370052	-0.0125645	0.00722892	-0.0268503	-0.00533563	690	699	0.0228916	0.0311532	0.0144578	0.011704	0.0110155	0.0187608	0.030809	0.0247849	0.0182444	0.0401033						0.259036	-0.0879518	0.0506024	-0.187952	-0.0373494	2.16558	-0.496694	0.436365	-2.14553
[truncated: 7 more columns]

## Sheet: VPS15_deuteration_table
				Date:			-		SD	0.010685																														for STDEV	Threshold Value=		0.3
Global Color scale				Experiment date:			-			-0.00952951																															Threshold percent		0.05
0.1	0.35	0.7		Sample:			HSVPS15_FL+13AA											-0.1	-0.05	0.05	0.1																				t-threshold		2.776
				Instrument:			Waters Synapt G2 Si
																										STDEVS					STDEVS
		Max Frac Deut		0.83		a	ComplexII_rab5					b	ComplexII_solo						a-b differences							a	ComplexII_rab5				b	ComplexII_solo									Differences in Daltons (Differences >+/- 0.5Da Highlighted					t-test	*=assumes triplicate values, a p=0.05 test
Start	End	Mod	m/z	#D	RT	0.3	3	30	300	3000		0.3	3	30	300	3000	Start	End	0.3	3	30	300	3000	Start	End	0.3	3	30	300	3000	0.3	3	30	300	3000						0.005	0.05	0.5	5	50	0.005	0.05	0.5	5
5	14		981.586	7	10.13-10.17	0.368675	0.695697	0.829948	0.86833	0.878313		0.333046	0.783477	0.877453	0.941136	0.932186	5	14	0.0356282	-0.0877797	-0.0475043	-0.0728055	-0.0538726	5	14	0.0385542	0.0283993	0.0113597	0.00843373	0.0108434	0.0314974	0.00929432	0.0144578	0.00877797	0.0091222						0.249398	-0.614458	-0.33253	-0.509639	-0.377108	1.23954	-5.08806	-4.47496	-10.3593
6	14		868.502	6	9.52-9.56	0.371285	0.731124	0.869679	0.918474	0.928916		0.334337	0.801406	0.921888	1.00341	0.971285	6	14	0.0369478	-0.0702811	-0.0522088	-0.0849398	-0.0423695	6	14	0.0389558	0.0220884	0.0114458	0.011245	0.00662651	0.0311245	0.0210843	0.0190763	0.0110442	0.0293173						0.221687	-0.421687	-0.313253	-0.509639	-0.254217	1.28343	-3.98646	-4.06482	-9.33416
18	27		1258.51	8	10.32-10.38	0.103464	0.178464	0.275151	0.370331	0.454819		0.106777	0.181325	0.283735	0.412651	0.515663	18	27	-0.00331325	-0.00286145	-0.00858434	-0.0423193	-0.0608434	18	27	0.0100904	0.0170181	0.00557229	0.0134036	0.0246988	0.0207831	0.0216867	0.010241	0.00331325	0.0305723						-0.026506	-0.0228916	-0.0686747	-0.338554	-0.486747	-0.248396	-0.179787	-1.2753	-5.30882
20	27		1008.42	6	8.62-8.69	0.0548193	0.088755	0.182329	0.259839	0.339759		0.0385542	0.113855	0.203414	0.296185	0.34759	20	27	0.0162651	-0.0251004	-0.0210843	-0.0363454	-0.00783133	20	27	0.0060241	0.00421687	0.00421687	0.0259036	0.00963855	0.00441767	0.00722892	0.0110442	0.0108434	0.0253012						0.0975904	-0.150602	-0.126506	-0.218072	-0.046988	3.77118	-5.19482	-3.08913	-2.24175
21	27		861.35	5	8.60-8.66	0.0310843	0.0855422	0.178554	0.230602	0.326506		0.0554217	0.115181	0.226506	0.273253	0.360964	21	27	-0.0243373	-0.0296386	-0.0479518	-0.0426506	-0.0344578	21	27	0.0156627	0.013494	0.00578313	0.0127711	0.0113253	0.0127711	0.0214458	0.0166265	0.0207229	0.00650602						-0.121687	-0.148193	-0.239759	-0.213253	-0.172289	-2.08584	-2.02604	-4.71808	-3.03478
26	37		1448.69	10	8.65-8.72	0.13241	0.253494	0.351807	0.421446	0.501084		0.112169	0.27241	0.345904	0.460843	0.549759	26	37	0.020241	-0.0189157	0.00590361	-0.0393976	-0.0486747	26	37	0.0204819	0.0249398	0.0110843	0.00855422	0.00554217	0.0155422	0.016506	0.0112048	0.016988	0.00891566						0.20241	-0.189157	0.0590361	-0.393976	-0.486747	1.36354	-1.09549	0.648774	-3.58771
32	50		2171.24	17	8.54-8.63	0.022679	0.101701	0.170801	0.245571	0.305103		0.00885897	0.12275	0.163076	0.251382	0.304465	32	50	0.01382	-0.0210489	0.00772502	-0.00581148	0.000637845	32	50	0.0037562	0.0163005	0.00623671	0.0143161	0.0145287	0.000850461	0.00850461	0.0155918	0.0144578	0.0142452						0.23494	-0.357831	0.131325	-0.0987952	0.0108434	6.21532	-1.98294	0.796775	-0.494719
38	49		1410.82	10	4.71-4.76	0.00951807	0.0226506	0.0612048	0.111566	0.16759		0.00951807	0.0293976	0.0691566	0.123614	0.177952	38	49	0	-0.00674699	-0.00795181	-0.0120482	-0.0103614	38	49	0.00192771	0.00421687	0.00325301	0.00240964	0.00445783	0.00277108	0.00120482	0.0053012	0.00590361	0.013253						0	-0.0674699	-0.0795181	-0.120482	-0.103614	0	-2.66465	-2.2144	-3.27268
38	51		1608.96	12	5.63-5.71	0.010241	0.0223896	0.0566265	0.0992972	0.142269		0.00381526	0.0184739	0.0550201	0.10241	0.144378	38	51	0.0064257	0.00391566	0.00160643	-0.00311245	-0.00210843	38	51	0.000803213	0.00240964	0.00271084	0.00160643	0.000502008	0.00170683	0.00220884	0.00732932	0.00100402	0.010241						0.0771084	0.046988	0.0192771	-0.0373494	-0.0253012	5.90002	2.07478	0.356054	-2.84575
38	54		1935.19	15	6.00-6.08	0.0102008	0.0150201	0.0439357	0.0882731	0.1151		0.00257028	0.0162249	0.0463454	0.0901205	0.120562	38	54	0.00763052	-0.00120482	-0.00240964	-0.00184739	-0.00546185	38	54	0.000963855	0.00457831	0.00562249	0.00594378	0.00738956	0.00449799	0.00417671	0.00706827	0.00698795	0.00650602						0.114458	-0.0180723	-0.0361446	-0.0277108	-0.0819277	2.87308	-0.336732	-0.462104	-0.348792
40	49		1135.66	8	4.68-4.73	0.0375	0.034488	0.0808735	0.138253	0.178464		0.0128012	0.026506	0.0855422	0.123795	0.175452	40	49	0.0246988	0.00798193	-0.00466867	0.0144578	0.00301205	40	49	0.0131024	0.0103916	0.0061747	0.00798193	0.0118976	0.00391566	0.00240964	0.0186747	0.0103916	0.013253						0.19759	0.0638554	-0.0373494	0.115663	0.0240964	3.12831	1.29603	-0.411122	1.9111
50	56		760.485	5	8.05-8.15	0.0240964	0.0889157	0.188434	0.217831	0.22988		0.0149398	0.10241	0.176867	0.206506	0.207229	50	56	0.00915663	-0.013494	0.0115663	0.0113253	0.0226506	50	56	0.013253	0.0253012	0.00361446	0.0284337	0.0156627	0.00481928	0.00650602	0.00578313	0.00843373	0.000722892						0.0457831	-0.0674699	0.0578313	0.0566265	0.113253	1.12464	-0.894655	2.93755	0.661404
55	71		1963.03	13	10.43-10.50	0.205561	0.386376	0.526043	0.6557	0.754773		0.178221	0.413994	0.555792	0.720204	0.805653	55	71	0.0273401	-0.0276182	-0.0297498	-0.0645042	-0.0508804	55	71	0.023355	0.0322521	0.0117702	0.00722892	0.00695088	0.0138091	0.0188137	0.031696	0.0142725	0.0094532						0.355422	-0.359036	-0.386747	-0.838554	-0.661446	1.74534	-1.28115	-1.52401	-6.98332
55	73		2221.12	15	10.32-10.39	0.179598	0.362088	0.486024	0.608514	0.740241		0.156305	0.363534	0.493173	0.656867	0.782249	55	73	0.0232932	-0.00144578	-0.00714859	-0.0483534	-0.042008	55	73	0.0183936	0.0120482	0.0114056	0.0138956	0.00907631	0.00730924	0.0216867	0.0198394	0.0155823	0.0185542						0.349398	-0.0216867	-0.107229	-0.725301	-0.63012	2.03838	-0.100939	-0.541059	-4.0114
56	62		756.402	4	8.09-8.16	0.356325	0.617169	0.785241	0.793976	0.797892		0.29488	0.644277	0.83012	0.884639	0.906627	56	62	0.0614458	-0.0271084	-0.0448795	-0.0906627	-0.108735	56	62	0.0183735	0.00873494	0.013253	0.0174699	0.00933735	0.00572289	0.0325301	0.0108434	0.014759	0.00753012						0.245783	-0.108434	-0.179518	-0.362651	-0.43494	5.53037	-1.394	-4.53953	-6.86637
56	66		1154.62	7	8.81-8.89	0.370396	0.621515	0.741652	0.79191	0.79432		0.355422	0.651291	0.767642	0.855077	0.85284	56	66	0.0149742	-0.0297762	-0.0259897	-0.063167	-0.0585198	56	66	0.0285714	0.0263339	0.00963855	0.0123924	0.0123924	0.0271945	0.00895009	0.0213425	0.0141136	0.0149742						0.104819	-0.208434	-0.181928	-0.442169	-0.409639	0.657533	-1.85429	-1.92225	-5.82515
67	73		937.439	5	5.93-5.99	0.02	0.0720482	0.189398	0.348434	0.511807		0.0183133	0.0722892	0.202169	0.378554	0.543373	67	73	0.00168675	-0.000240964	-0.0127711	-0.0301205	-0.0315663	67	73	0.00722892	0.0146988	0.0110843	0.0122892	0.00939759	0.00289157	0.00963855	0.00289157	0.00819277	0.0448193						0.00843373	-0.00120482	-0.0638554	-0.150602	-0.157831	0.375239	-0.0237446	-1.931	-3.53224
73	82		1170.67	8	6.62-6.73	0.0177711	0.0597892	0.0975904	0.22741	0.3125		0.0197289	0.0667169	0.109036	0.256627	0.324849	73	82	-0.00195783	-0.00692771	-0.0114458	-0.0292169	-0.0123494	73	82	0.00331325	0.0060241	0.00376506	0.00256024	0.00165663	0.00135542	0.00512048	0.00557229	0.00587349	0.0225904						-0.0156627	-0.0554217	-0.0915663	-0.233735	-0.0987952	-0.947283	-1.51768	-2.94789	-7.89811
75	82		928.545	6	4.89-4.93	0.145382	0.323695	0.437751	0.5	0.587751		0.120482	0.323896	0.455823	0.533333	0.596586	75	82	0.0248996	-0.000200803	-0.0180723	-0.0333333	-0.00883534	75	82	0.0060241	0.0491968	0.00401606	0.0162651	0.00903614	0.00522088	0.0212851	0.0124498	0.014257	0.0417671						0.149398	-0.00120482	-0.108434	-0.2	-0.053012	5.41009	-0.00648836	-2.39285	-2.66933
75	92		2046.07	15	7.97-8.03	0.0973494	0.218635	0.333333	0.415502	0.569719		0.0941365	0.229076	0.344257	0.460643	0.573735	75	92	0.00321285	-0.0104418	-0.0109237	-0.0451406	-0.00401606	75	92	0.0167068	0.0227309	0.00987952	0.0105221	0.0256225	0.0086747	0.0141365	0.0131727	0.00698795	0.0421687						0.0481928	-0.156627	-0.163855	-0.677108	-0.060241	0.295613	-0.67564	-1.14907	-6.18992
79	92		1535.7	11	8.35-8.42	0.129792	0.250821	0.364294	0.465717	0.614567		0.0914567	0.257065	0.359474	0.494962	0.612596	79	92	0.0383352	-0.00624315	0.00481928	-0.0292442	0.00197152	79	92	0.0214677	0.0166484	0.0115005	0.0194962	0.0118291	0.00295728	0.0256298	0.02092	0.0219058	0.0429354						0.421687	-0.0686747	0.053012	-0.321687	0.0216867	3.06401	-0.353817	0.349654	-1.72727
79	100		2352.12	19	7.69-7.78	0.207926	0.328599	0.425555	0.539822	0.67844		0.17546	0.329613	0.437032	0.576284	0.703932	79	100	0.0324667	-0.00101458	-0.0114775	-0.0364616	-0.0254914	79	100	0.0159797	0.0226379	0.00798985	0.00849715	0.00691186	0.015409	0.0220672	0.0187698	0.0107166	0.0488269						0.616867	-0.0192771	-0.218072	-0.692771	-0.484337	2.53319	-0.0555867	-0.974509	-4.61767
79	101		2465.2	20	8.68-8.76	0.197289	0.31247	0.418976	0.523012	0.661265		0.164518	0.318614	0.426747	0.559458	0.671747	79	101	0.0327711	-0.00614458	-0.00777108	-0.0364458	-0.0104819	79	101	0.0269277	0.0177711	0.00801205	0.00981928	0.00801205	0.0159036	0.0194578	0.0230723	0.0135542	0.0392169						0.655422	-0.122892	-0.155422	-0.728916	-0.209639	1.815	-0.40387	-0.551098	-3.77159
84	98		1635.83	12	6.19-6.26	0.0752008	0.131727	0.202008	0.293574	0.36757		0.0688755	0.151807	0.204719	0.323293	0.376104	84	98	0.0063253	-0.0200803	-0.00271084	-0.0297189	-0.00853414	84	98	0.0128514	0.0153614	0.0103414	0.0154618	0.00491968	0.00823293	0.0131526	0.0111446	0.0100402	0.0327309						0.0759036	-0.240964	-0.0325301	-0.356627	-0.10241	0.717827	-1.71984	-0.308832	-2.79212
93	101		947.511	7	5.94-6.03	0.18537	0.278657	0.366609	0.50895	0.665749		0.146988	0.273666	0.366093	0.516523	0.659897	93	101	0.0383821	0.00499139	0.000516351	-0.00757315	0.00585198	93	101	0.010327	0.00826162	0.0125645	0.00619621	0.0168675	0.0223752	0.0240964	0.00344234	0.0154905	0.0358003						0.268675	0.0349398	0.00361446	-0.053012	0.0409639	2.69767	0.339388	0.0686503	-0.786216
101	110		1322.71	8	8.07-8.19	0.0156627	0.0212349	0.0486446	0.162048	0.271084		0.00225904	0.0271084	0.0581325	0.184639	0.277711	101	110	0.0134036	-0.00587349	-0.00948795	-0.0225904	-0.00662651	101	110	0.0239458	0.011747	0.022741	0.027259	0.00722892	0.0103916	0.00813253	0.00948795	0.0061747	0.0197289						0.107229	-0.046988	-0.0759036	-0.180723	-0.053012	0.889378	-0.712039	-0.666925	-1.39993
102	108		982.499	5	5.76-5.85	0.00409639	0.00795181	0.0546988	0.202651	0.320241		-0.00192771	0.0257831	0.0679518	0.231325	0.343855	102	108	0.0060241	-0.0178313	-0.013253	-0.0286747	-0.0236145	102	108	0.0190361	0.0125301	0.00240964	0.0118072	0.0060241	0.00843373	0.00963855	0.0101205	0.00457831	0.0060241						0.0301205	-0.0891566	-0.0662651	-0.143373	-0.118072	0.501137	-1.95369	-2.20648	-3.92189
111	120		1266.67	7	8.89-8.99	0.0301205	0.11463	0.167814	0.309639	0.47315		0.0354561	0.12599	0.176764	0.342857	0.507057	111	120	-0.00533563	-0.0113597	-0.00895009	-0.0332186	-0.0339071	111	120	0.00826162	0.00430293	0.0165232	0.00671256	0.00499139	0.0070568	0.00929432	0.00654045	0.00791738	0.0120482						-0.0373494	-0.0795181	-0.0626506	-0.23253	-0.237349	-0.850566	-1.92106	-0.872339	-5.54302
111	122		1494.76	9	7.92-8.09	0.0685408	0.150469	0.196386	0.317805	0.482329		0.0651941	0.161847	0.213521	0.363855	0.496787	111	122	0.00334672	-0.0113788	-0.0171352	-0.0460509	-0.0144578	111	122	0.00441767	0.0148594	0.0131191	0.00307898	0.0164659	0.0127175	0.0165997	0.0247657	0.027577	0.0448461						0.0301205	-0.10241	-0.154217	-0.414458	-0.13012	0.430565	-0.884633	-1.05899	-2.8745
111	124		1736.88	11	8.95-9.00	0.06977	0.194743	0.247426	0.340745	0.467141		0.0572837	0.206462	0.255203	0.370975	0.48138	111	124	0.0124863	-0.0117196	-0.00777656	-0.03023	-0.0142388	111	124	0.00711939	0.0112815	0.00383352	0.00481928	0.0109529	0.00449069	0.0104053	0.011172	0.00788609	0.0342826						0.137349	-0.128916	-0.0855422	-0.33253	-0.156627	2.56932	-1.32264	-1.14038	-5.66539
123	130		1061.6	6	9.66-9.71	0.000401606	-0.00100402	0.00220884	-0.000803213	0.00200803		0.00220884	0.00120482	0.00481928	0.00522088	0.00843373	123	130	-0.00180723	-0.00220884	-0.00261044	-0.0060241	-0.0064257	123	130	0.00140562	0.00502008	0.00281124	0.00160643	0.00461847	0.00261044	0.000803213	0.00240964	0.00180723	0.00140562						-0.0108434	-0.013253	-0.0156627	-0.0361446	-0.0385542	-1.05578	-0.752531	-1.22114	-4.31517
134	153		2162.08	18	4.47-4.50	0.00562249	0.0155288	0.0391566	0.0893574	0.117001		0.00883534	0.0205489	0.043842	0.10174	0.123159	134	153	-0.00321285	-0.00502008	-0.00468541	-0.0123829	-0.00615797	134	153	0.00113788	0.00575636	0.00475234	0.00334672	0.00160643	0.00133869	0.00147256	0.00495315	0.00709505	0.00870147						-0.0578313	-0.0903614	-0.0843373	-0.222892	-0.110843	-3.16732	-1.46339	-1.18226	-2.73402
134	154		2261.15	19	4.90-4.97	0.00843373	0.0163602	0.0401395	0.0894103	0.112238		0.00862397	0.0146481	0.0411541	0.0917565	0.113887	134	154	-0.000190235	0.00171211	-0.00101458	-0.00234623	-0.0016487	134	154	0.00247305	0.00215599	0.00475587	0.00291693	0.00240964	0.00298034	0.00215599	0.00317058	0.00247305	0.00894103						-0.00361446	0.0325301	-0.0192771	-0.0445783	-0.0313253	-0.08508	0.972592	-0.307446	-1.06265
134	155		2392.19	20	5.43-5.49	0.00524096	0.0113253	0.0318675	0.0740361	0.0950602		0.00343373	0.0100602	0.0313855	0.0757831	0.0957229	134	155	0.00180723	0.00126506	0.000481928	-0.00174699	-0.000662651	134	155	0.0010241	0.000722892	0.00198795	0.00277108	0.00150602	0.000722892	0.000361446	0.00222892	0.00222892	0.00728916						0.0361446	0.0253012	0.00963855	-0.0349398	-0.013253	2.49711	2.71109	0.279486	-0.850858
134	156		2491.26	21	5.90-5.97	0.0130235	0.019105	0.0393574	0.0827883	0.0954676		0.00292599	0.0192771	0.0363741	0.0774527	0.0954676	134	156	0.0100975	-0.000172117	0.00298336	0.00533563	0	134	156	0.0060241	0.005393	0.00527826	0.00585198	0.00430293	0.000458979	0.00837636	0.00229489	0.00470453	0.00786001						0.212048	-0.00361446	0.0626506	0.112048	0	2.89486	-0.0299243	0.897798	1.23081
136	145		1095.58	8	6.75-6.86	-0.0060241	0.0128012	0.0460843	0.189006	0.213705		-0.00813253	0.00587349	0.0427711	0.175753	0.230422	136	145	0.00210843	0.00692771	0.00331325	0.013253	-0.0167169	136	145	0.0177711	0.0060241	0.0129518	0.011747	0.0118976	0.00105422	0.0135542	0.00737952	0.00963855	0.0114458						0.0168675	0.0554217	0.026506	0.106024	-0.133735	0.205137	0.80897	0.384979	1.51067
136	154		2089.07	17	4.64-4.69	0.0128987	0.0169383	0.0357193	0.0893692	0.113111		-0.000496102	0.00942594	0.0317505	0.0898653	0.111694	136	154	0.0133948	0.0075124	0.00396882	-0.000496102	0.00141743	136	154	0.000992204	0.00446492	0.00517364	0.00255138	0.00467753	0.00340184	0.00347271	0.00481928	0.00694543	0.0108434						0.227711	0.127711	0.0674699	-0.00843373	0.0240964	6.54715	2.30037	0.972236	-0.11613
136	155		2220.11	18	5.19-5.23	0.011178	0.0139224	0.0354083	0.0827309	0.103213		0.00274431	0.0113788	0.030589	0.0797189	0.100535	136	155	0.00843373	0.00254351	0.00481928	0.00301205	0.00267738	136	155	0.00060241	0.00314592	0.00455154	0.00267738	0.0021419	0.00060241	0.000133869	0.00200803	0.00555556	0.00963855						0.151807	0.0457831	0.086747	0.0542169	0.0481928	17.1464	1.39912	1.6779	0.84595
137	156		2220.11	18	5.19-5.25	0.0126506	0.0160643	0.034672	0.0823293	0.104016		0.00287818	0.0115127	0.0314592	0.08166	0.101339	137	156	0.00977242	0.00455154	0.00321285	0.000669344	0.00267738	137	156	0.00180723	0.00200803	0.00468541	0.00394913	0.00160643	0.000669344	0.00100402	0.00174029	0.00307898	0.00983936						0.175904	0.0819277	0.0578313	0.0120482	0.0481928	8.78287	3.5115	1.11337	0.231517
154	160		835.39	5	8.93-8.98	-0.00168675	0.0125301	0.00746988	0.026988	0.126506		0.0115663	0.0371084	0.0204819	0.0479518	0.168434	154	160	-0.013253	-0.0245783	-0.013012	-0.0209639	-0.0419277	154	160	0.0142169	0.00409639	0.0195181	0.0168675	0.00144578	0.00337349	0.0171084	0.0262651	0.0127711	0.0257831						-0.0662651	-0.122892	-0.0650602	-0.104819	-0.209639	-1.571	-2.4199	-0.688732	-1.71625
155	161		922.401	5	11.93-11.98	0.0549398	0.0513253	0.0231325	0.0561446	0.163855		0.0612048	0.0607229	0.0537349	0.0787952	0.139759	155	161	-0.00626506	-0.00939759	-0.0306024	-0.0226506	0.0240964	155	161	0.0443373	0.0450602	0.0221687	0.0368675	0.0151807	0.0166265	0.0342169	0.0363855	0.033012	0.0279518						-0.0313253	-0.046988	-0.153012	-0.113253	0.120482	-0.229163	-0.287686	-1.24404	-0.792767
156	163		1003.51	6	12.82-12.85	0.00240964	0.00481928	0.0148594	0.0230924	0.0781124		0.00421687	0.00562249	0.0144578	0.0327309	0.0785141	156	163	-0.00180723	-0.000803213	0.000401606	-0.00963855	-0.000401606	156	163	0.00341365	0.00341365	0.00401606	0.00200803	0.00100402	0.00361446	0.00522088	0.00100402	0.0062249	0.0060241						-0.0108434	-0.00481928	0.00240964	-0.0578313	-0.00240964	-0.629612	-0.223027	0.168034	-2.55237
157	163		904.444	5	12.76-12.81	0.00578313	0.0125301	0.0173494	0.033253	0.0453012		0.0228916	0.0173494	0.00674699	0.0175904	0.0559036	157	163	-0.0171084	-0.00481928	0.0106024	0.0156627	-0.0106024	157	163	0.0110843	0.0139759	0.00891566	0.0243373	0.0154217	0.0204819	0.0183133	0.00289157	0.00698795	0.013494						-0.0855422	-0.0240964	0.053012	0.0783133	-0.053012	-1.2724	-0.362341	1.95927	1.0714
167	182		1810.84	11	9.18-9.23	0.0460022	0.110405	0.227382	0.36287	0.445345		0.0433735	0.124973	0.23012	0.384447	0.488609	167	182	0.0026287	-0.0145674	-0.00273823	-0.0215772	-0.043264	167	182	0.0116101	0.00646221	0.0288061	0.0198248	0.041621	0.0261774	0.018839	0.0329682	0.0231106	0.0214677						0.0289157	-0.160241	-0.0301205	-0.237349	-0.475904	0.158994	-1.26686	-0.108331	-1.2274
167	183		1957.91	12	10.51-10.55	0.0061245	0.0605422	0.162851	0.270181	0.42008		0.00813253	0.0583333	0.159438	0.288956	0.410743	167	183	-0.00200803	0.00220884	0.00341365	-0.0187751	0.00933735	167	183	0.00592369	0.00552209	0.0215863	0.00522088	0.0109438	0.0119478	0.0104418	0.0157631	0.00973896	0.0288153						-0.0240964	0.026506	0.0409639	-0.225301	0.112048	-0.260805	0.323892	0.221206	-2.94291
168	182		1663.77	10	8.26-8.32	0.0213253	0.0849398	0.179518	0.277229	0.388675		0.0157831	0.0951807	0.178916	0.295542	0.395181	168	182	0.00554217	-0.010241	0.00060241	-0.0183133	-0.00650602	168	182	0.000722892	0.0104819	0.00795181	0.0110843	0.00939759	0.00325301	0.00662651	0.00554217	0.0114458	0.0303614						0.0554217	-0.10241	0.0060241	-0.183133	-0.0650602	2.88063	-1.43037	0.107649	-1.99077
171	182		1358.64	8	6.98-7.05	0.0338855	0.119127	0.221386	0.314458	0.409337		0.0260542	0.126054	0.222741	0.330873	0.402259	171	182	0.00783133	-0.00692771	-0.00135542	-0.0164157	0.00707831	171	182	0.00542169	0.0138554	0.0143072	0.0149096	0.00301205	0.00135542	0.0215361	0.0292169	0.0114458	0.0347892						0.0626506	-0.0554217	-0.0108434	-0.131325	0.0566265	2.42715	-0.468567	-0.0721649	-1.51267
171	183		1505.7	9	9.07-9.11	0.0200803	0.0824632	0.171754	0.271888	0.392236		0.0133869	0.0941098	0.180589	0.302276	0.404685	171	183	0.00669344	-0.0116466	-0.00883534	-0.0303882	-0.0124498	171	183	0.000535475	0.0124498	0.00923695	0.011245	0.00655957	0.00307898	0.00776439	0.00696118	0.0105756	0.0310576						0.060241	-0.104819	-0.0795181	-0.273494	-0.112048	3.70965	-1.37485	-1.32309	-3.40965
184	196		1727.78	11	8.59-8.65	-0.00876232	0.00591457	0.0361446	0.128697	0.254107		-0.00624315	0.0214677	0.0710843	0.138116	0.251369	184	196	-0.00251917	-0.0155531	-0.0349398	-0.0094195	0.00273823	184	196	0.00613363	0.0106243	0.00930997	0.0115005	0.00405257	0.00569551	0.0122673	0.00963855	0.0219058	0.0212486						-0.0277108	-0.171084	-0.384337	-0.103614	0.0301205	-0.521293	-1.65998	-4.51601	-0.659428
185	195		1450.68	9	6.85-6.89	0.0267738	0.0372155	0.0945114	0.176975	0.2917		0.0104418	0.038822	0.0895582	0.178447	0.303614	185	195	0.016332	-0.00160643	0.00495315	-0.00147256	-0.0119143	185	195	0.00749665	0.00910308	0.00776439	0.0085676	0.00548862	0.00749665	0.000937082	0.0085676	0.00937082	0.0267738						0.146988	-0.0144578	0.0445783	-0.013253	-0.107229	2.66819	-0.304049	0.741981	-0.200876
187	208		2623.24	19	9.75-9.80	0.0804692	0.143056	0.175016	0.207229	0.250793		0.0714648	0.146607	0.177806	0.217565	0.256183	187	208	0.00900444	-0.00355105	-0.00279011	-0.0103361	-0.00538998	187	208	0.00982879	0.0093215	0.0082435	0.00875079	0.00577045	0.00621433	0.0076728	0.00837032	0.00678503	0.0263792						0.171084	-0.0674699	-0.053012	-0.196386	-0.10241	1.3412	-0.509442	-0.411353	-1.61677
197	207		1190.58	8	8.68-8.74	0.113855	0.214006	0.256627	0.270783	0.295633		0.10241	0.223494	0.246687	0.292771	0.298494	197	207	0.0114458	-0.00948795	0.00993976	-0.021988	-0.00286145	197	207	0.0176205	0.0231928	0.0126506	0.00843373	0.00978916	0.010241	0.0176205	0.010994	0.0131024	0.0289157						0.0915663	-0.0759036	0.0795181	-0.175904	-0.0228916	0.972735	-0.564204	1.0272	-2.44411
197	208		1337.64	9	10.51-10.55	0.12905	0.232798	0.272691	0.292236	0.312851		0.117805	0.253414	0.269746	0.315529	0.3166	197	208	0.011245	-0.0206158	0.00294511	-0.0232932	-0.00374833	197	208	0.0196787	0.0242303	0.00883534	0.00883534	0.00870147	0.0131191	0.0171352	0.00414993	0.00843373	0.0216867						0.101205	-0.185542	0.026506	-0.209639	-0.0337349	0.823516	-1.20321	0.522577	-3.30307
212	225		1647.82	10	10.49-10.61	0.365663	0.583494	0.651566	0.685181	0.687349		0.318916	0.619759	0.671928	0.743012	0.705542	212	225	0.046747	-0.0362651	-0.0203614	-0.0578313	-0.0181928	212	225	0.0163855	0.0521687	0.0110843	0.0137349	0.00493976	0.0277108	0.0340964	0.0280723	0.0125301	0.0477108						0.46747	-0.362651	-0.203614	-0.578313	-0.181928	2.5151	-1.00786	-1.1685	-5.38771
213	225		1534.73	9	10.05-10.09	0.35502	0.551539	0.625703	0.648594	0.648594		0.307363	0.586613	0.638153	0.697724	0.676171	213	225	0.0476573	-0.0350736	-0.0124498	-0.0491299	-0.027577	213	225	0.042838	0.0473896	0.0129853	0.0100402	0.00789826	0.024498	0.0271754	0.0290495	0.0156627	0.0465863						0.428916	-0.315663	-0.112048	-0.442169	-0.248193	1.6727	-1.11204	-0.677684	-4.57394
215	225		1242.63	7	9.56-9.62	0.342685	0.539415	0.603787	0.641652	0.642169		0.291738	0.574182	0.618244	0.690189	0.65284	215	225	0.0509466	-0.0347676	-0.0144578	-0.048537	-0.0106713	215	225	0.0404475	0.0421687	0.0080895	0.0120482	0.00895009	0.0194492	0.03821	0.026506	0.0163511	0.0442341						0.356627	-0.243373	-0.101205	-0.339759	-0.0746988	1.96615	-1.05824	-0.903609	-4.13916
219	230		1342.68	9	7.92-7.99	0.0547523	0.0508701	0.140027	0.187818	0.302142		0.0192771	0.0789826	0.161981	0.225033	0.3083	219	230	0.0354752	-0.0281124	-0.0219545	-0.0372155	-0.00615797	219	230	0.0153949	0.00937082	0.00240964	0.00481928	0.024498	0.000669344	0.00963855	0.0156627	0.0085676	0.0172691						0.319277	-0.253012	-0.19759	-0.33494	-0.0554217	3.98748	-3.62213	-2.3996	-6.55738
226	240		1774.89	13	4.86-4.92	0.231974	0.361446	0.427155	0.501205	0.536608		0.19481	0.375162	0.439388	0.53494	0.558943	226	240	0.037164	-0.0137164	-0.0122335	-0.0337349	-0.0223355	226	240	0.0245598	0.0241891	0.00630213	0.00713624	0.00889713	0.0153846	0.0255792	0.0274328	0.0197405	0.0182576						0.483133	-0.178313	-0.159036	-0.438554	-0.290361	2.22115	-0.674829	-0.752792	-2.78363
226	242		2035.04	15	8.56-8.65	0.160402	0.259438	0.328594	0.385703	0.410924		0.135743	0.278072	0.337349	0.428594	0.422249	226	242	0.0246586	-0.0186345	-0.00875502	-0.0428916	-0.0113253	226	242	0.0194378	0.0191165	0.00554217	0.0257831	0.0163855	0.0125301	0.0183133	0.0102008	0.0118072	0.0450602						0.36988	-0.279518	-0.131325	-0.643373	-0.16988	1.84681	-1.21921	-1.30622	-2.61973
251	259		1021.55	6	12.57-12.59	0.0060241	0.0100402	0.0355422	0.161647	0.351807		0.00180723	0.011245	0.0439759	0.190763	0.365462	251	259	0.00421687	-0.00120482	-0.00843373	-0.0291165	-0.0136546	251	259	0.011245	0.00662651	0.0062249	0.00803213	0.00361446	0.00803213	0.00281124	0.00261044	0.00421687	0.0293173						0.0253012	-0.00722892	-0.0506024	-0.174699	-0.0819277	0.528535	-0.289908	-2.16407	-5.55913
251	260		1136.58	7	12.07-12.11	0.00516351	0.013253	0.0358003	0.127883	0.271256		0.00361446	0.0137694	0.0395869	0.151807	0.279862	251	260	0.00154905	-0.000516351	-0.00378657	-0.0239243	-0.00860585	251	260	0.00447504	0.00688468	0.00413081	0.00361446	0.00430293	0.00240964	0.00344234	0.0060241	0.00413081	0.0166954						0.0108434	-0.00361446	-0.026506	-0.16747	-0.060241	0.527892	-0.11619	-0.897897	-7.54944
251	261		1249.66	8	13.06-13.09	-0.00135542	0.0254518	0.0200301	0.100452	0.278012		0.0121988	0.0161145	0.0495482	0.136596	0.281928	251	261	-0.0135542	0.00933735	-0.0295181	-0.0361446	-0.00391566	251	261	0.00436747	0.0218373	0.00120482	0.0064759	0.0161145	0.0212349	0.0201807	0.015512	0.0340361	0.0123494						-0.108434	0.0746988	-0.236145	-0.289157	-0.0313253	-1.0829	0.543908	-3.28604	-1.80693
252	259		908.464	5	11.71-11.75	0.00337349	0.00698795	0.0491566	0.2	0.425542		-0.00481928	0.0053012	0.0491566	0.22747	0.438313	252	259	0.00819277	0.00168675	0	-0.0274699	-0.0127711	252	259	0.000963855	0.00409639	0.00144578	0.00361446	0.00361446	0.00168675	0.00361446	0.000722892	0.00578313	0.0253012						0.0409639	0.00843373	0	-0.137349	-0.0638554	7.30437	0.534782	0	-6.97669
252	260		1023.49	6	11.15-11.19	0.00100402	0.00461847	0.036747	0.147189	0.318675		0.000200803	0.00702811	0.037751	0.171687	0.330321	252	260	0.000803213	-0.00240964	-0.00100402	-0.024498	-0.0116466	252	260	0.00301205	0.00341365	0.000200803	0.00220884	0.00381526	0.00301205	0.00220884	0.00140562	0.00200803	0.0190763						0.00481928	-0.0144578	-0.0060241	-0.146988	-0.0698795	0.326599	-1.02648	-1.22474	-14.2143
252	261		1136.58	7	12.76-12.81	0.00413081	0.00688468	0.0364888	0.142857	0.354905		0.000172117	0.0106713	0.0438898	0.169707	0.378141	252	261	0.00395869	-0.00378657	-0.00740103	-0.0268503	-0.0232358	252	261	0.000344234	0.00223752	0.0020654	0.00258176	0.00774527	0.00120482	0.00154905	0.00327022	0.00619621	0.00619621						0.0277108	-0.026506	-0.0518072	-0.187952	-0.162651	5.47206	-2.40998	-3.31424	-6.9282
252	264		1464.75	10	12.85-12.88	-0.0013253	0.00361446	0.0463855	0.169036	0.332048		0.00493976	0.010241	0.0539759	0.190723	0.356747	252	264	-0.00626506	-0.00662651	-0.00759036	-0.0216867	-0.0246988	252	264	0.00204819	0.00445783	0.00289157	0.00385542	0.00277108	0.0114458	0.00168675	0.00120482	0.00542169	0.00759036						-0.0626506	-0.0662651	-0.0759036	-0.216867	-0.246988	-0.933245	-2.40805	-4.19689	-5.64618
265	278		1689.86	11	9.75-9.84	0.0535597	0.104162	0.2023	0.277108	0.301972		0.0455641	0.113143	0.212158	0.304819	0.309091	265	278	0.00799562	-0.00898138	-0.00985761	-0.0277108	-0.00711939	265	278	0.00481928	0.0108434	0.00843373	0.0060241	0.00547645	0.00711939	0.00646221	0.00876232	0.00920044	0.0219058						0.0879518	-0.0987952	-0.108434	-0.304819	-0.0783133	1.61086	-1.23237	-1.40391	-4.36445
265	279		1803.91	12	9.15-9.21	0.0792169	0.113253	0.225402	0.301908	0.375904		0.0655622	0.128414	0.241365	0.334036	0.380422	265	279	0.0136546	-0.0151606	-0.0159639	-0.0321285	-0.00451807	265	279	0.0165663	0.0155622	0.0181727	0.00742972	0.00863454	0.0104418	0.0115462	0.0213855	0.00522088	0.00190763						0.163855	-0.181928	-0.191566	-0.385542	-0.0542169	1.20774	-1.35511	-0.985255	-6.12821
279	288		1239.62	8	5.00-5.08	0.0837349	0.119428	0.113554	0.203313	0.358434		0.0531627	0.105271	0.131024	0.223494	0.369277	279	288	0.0305723	0.0141566	-0.0174699	-0.0201807	-0.0108434	279	288	0.0186747	0.0158133	0.00466867	0.00481928	0.00843373	0.00828313	0.0111446	0.00978916	0.0106928	0.022741						0.244578	0.113253	-0.139759	-0.161446	-0.086747	2.59201	1.26746	-2.78999	-2.98023
281	290		1209.64	8	8.58-8.65	0.00963855	0.0438253	0.117319	0.28494	0.507229		0.0263554	0.0450301	0.12259	0.285843	0.513102	281	290	-0.0167169	-0.00120482	-0.00527108	-0.000903614	-0.00587349	281	290	0.00361446	0.00286145	0.0100904	0.014759	0.00376506	0.0144578	0.00391566	0.00361446	0.0063253	0.0320783						-0.133735	-0.00963855	-0.0421687	-0.00722892	-0.046988	-1.94289	-0.43029	-0.851803	-0.0974697
282	288		884.399	5	4.99-5.02	0.0501205	0.0722892	0.120482	0.241205	0.459759		0.0660241	0.0954217	0.118554	0.253012	0.477349	282	288	-0.0159036	-0.0231325	0.00192771	-0.0118072	-0.0175904	282	288	0.0240964	0.0159036	0.0248193	0.0308434	0.00506024	0.0149398	0.0192771	0.0127711	0.0122892	0.0385542						-0.0795181	-0.115663	0.00963855	-0.0590361	-0.0879518	-0.971569	-1.60327	0.119621	-0.615958
285	291		816.471	5	4.63-4.66	0.00626506	0.00554217	0.0313253	0.169157	0.622651		0.00144578	0.00819277	0.0337349	0.194699	0.631566	285	291	0.00481928	-0.0026506	-0.00240964	-0.0255422	-0.00891566	285	291	0.0060241	0.000481928	0.00289157	0.00168675	0.00385542	0.00337349	0.00987952	0.00795181	0.00771084	0.0484337						0.0240964	-0.013253	-0.0120482	-0.127711	-0.0445783	1.20898	-0.464145	-0.493264	-5.60488
289	306		2179.11	15	6.35-6.49	0.0134137	0.0297189	0.0583936	0.103695	0.207149		0.00899598	0.0314056	0.0541365	0.105382	0.206185	289	306	0.00441767	-0.00168675	0.00425703	-0.00168675	0.000963855	289	306	0.00192771	0.0053012	0.00216867	0.000803213	0.00104418	0.00216867	0.00353414	0.00168675	0.00610442	0.01751						0.0662651	-0.0253012	0.0638554	-0.0253012	0.0144578	2.63705	-0.458549	2.68376	-0.474503
291	306		1966.95	13	6.36-6.41	0.00620945	0.0279889	0.0641335	0.115292	0.22975		0.0122335	0.0480074	0.0744208	0.13114	0.247081	291	306	-0.0060241	-0.0200185	-0.0102873	-0.015848	-0.0173309	291	306	0.0123262	0.010658	0.00648749	0.015848	0.0195551	0.00611677	0.00732159	0.00574606	0.00389249	0.0209453						-0.0783133	-0.260241	-0.133735	-0.206024	-0.225301	-0.758261	-2.68149	-2.05603	-1.68206
293	306		1737.85	11	5.02-5.10	0.0405257	0.0543264	0.0973713	0.152903	0.284995		0.0105148	0.0415115	0.0703176	0.150931	0.299562	293	306	0.030011	0.0128149	0.0270537	0.00197152	-0.0145674	293	306	0.0141292	0.0136911	0.00273823	0.00427163	0.00350493	0.00186199	0.0100767	0.00317634	0.0118291	0.0138007						0.33012	0.140964	0.29759	0.0216867	-0.160241	3.64739	1.30568	11.1735	0.271515
294	306		1606.81	10	4.72-4.81	-0.00626506	0.00614458	0.0422892	0.118434	0.282289		0.00385542	0.0257831	0.0544578	0.136265	0.293855	294	306	-0.0101205	-0.0196386	-0.0121687	-0.0178313	-0.0115663	294	306	0.00566265	0.00698795	0.00590361	0.00746988	0.00457831	0.00192771	0.00518072	0.0039759	0.00722892	0.0250602						-0.101205	-0.196386	-0.121687	-0.178313	-0.115663	-2.93043	-3.91025	-2.96121	-2.97111
298	319		2616.33	19	6.67-6.76	0.222765	0.303297	0.338998	0.352251	0.356563		0.184464	0.316677	0.342169	0.380913	0.361002	298	319	0.0383006	-0.0133798	-0.00317058	-0.028662	-0.00443881	298	319	0.0259353	0.0248573	0.0102727	0.0098922	0.00545339	0.0171211	0.0222575	0.0133164	0.0128091	0.0285986						0.727711	-0.254217	-0.060241	-0.544578	-0.0843373	2.13466	-0.694559	-0.326525	-3.06743
299	305		859.44	5	5.95-6.01	0.0455422	0.181928	0.353976	0.71012	0.876867		0.0431325	0.190602	0.366506	0.724096	0.865783	299	305	0.00240964	-0.0086747	-0.0125301	-0.0139759	0.0110843	299	305	0.00722892	0.0159036	0.0159036	0.00698795	0.00385542	0.00746988	0.0053012	0.0151807	0.00771084	0.0643373						0.0120482	-0.0433735	-0.0626506	-0.0698795	0.0554217	0.401502	-0.896273	-0.987124	-2.32621
307	316		1223.64	8	6.27-6.37	0.024247	0.0439759	0.115361	0.191416	0.363855		0.011747	0.0385542	0.109488	0.198193	0.376506	307	316	0.0125	0.00542169	0.00587349	-0.00677711	-0.0126506	307	316	0.00406627	0.00722892	0.0111446	0.0063253	0.00391566	0.00256024	0.00256024	0.00436747	0.00436747	0.0313253						0.1	0.0433735	0.046988	-0.0542169	-0.101205	4.50573	1.22451	0.849904	-1.52711
307	320		1709.89	11	10.21-10.27	0.0347207	0.124754	0.191347	0.239211	0.335487		0.0308872	0.131106	0.199124	0.257831	0.341402	307	320	0.00383352	-0.00635268	-0.00777656	-0.0186199	-0.00591457	307	320	0.00197152	0.00876232	0.00700986	0.00832421	0.00624315	0.00131435	0.00810515	0.00635268	0.00920044	0.0214677						0.0421687	-0.0698795	-0.0855422	-0.204819	-0.0650602	2.80224	-0.921836	-1.4238	-2.59934
307	321		1872.95	12	10.53-10.63	0.0271084	0.111044	0.170683	0.215361	0.299197		0.02249	0.121687	0.177008	0.231727	0.303414	307	321	0.00461847	-0.0106426	-0.0063253	-0.0163655	-0.00421687	307	321	0.00160643	0.0116466	0.00763052	0.00431727	0.00562249	0.00251004	0.00702811	0.0060241	0.00883534	0.0282129						0.0554217	-0.127711	-0.0759036	-0.196386	-0.0506024	2.6843	-1.35512	-1.12692	-2.88251
309	316		947.494	6	5.94-6.01	0.204819	0.322691	0.422892	0.581325	0.76245		0.165863	0.310643	0.4249	0.598193	0.754618	309	316	0.0389558	0.0120482	-0.00200803	-0.0168675	0.00783133	309	316	0.0196787	0.00923695	0.0164659	0.00160643	0.0134538	0.0172691	0.0246988	0.00542169	0.0170683	0.0417671						0.233735	0.0722892	-0.0120482	-0.101205	0.046988	2.57714	0.791371	-0.20063	-1.70414
321	328		1061.49	5	11.93-11.97	0.00987952	0.0313253	0.120723	0.160241	0.219036		0.00578313	0.0284337	0.135422	0.179277	0.223855	321	328	0.00409639	0.00289157	-0.0146988	-0.0190361	-0.00481928	321	328	0.00385542	0.00674699	0.00891566	0.00168675	0.00506024	0.000963855	0.0026506	0.00578313	0.0139759	0.0209639						0.0204819	0.0144578	-0.073494	-0.0951807	-0.0240964	1.78536	0.690904	-2.39569	-2.34218
321	330		1260.58	7	11.10-11.14	0.0177281	0.063167	0.193632	0.275904	0.395009		0.0134251	0.0693632	0.20895	0.304475	0.408262	321	330	0.00430293	-0.00619621	-0.0153184	-0.0285714	-0.013253	321	330	0.00533563	0.00447504	0.00447504	0.000688468	0.00533563	0.00327022	0.00240964	0.0101549	0.00877797	0.022031						0.0301205	-0.0433735	-0.107229	-0.2	-0.0927711	1.19093	-2.11157	-2.3909	-5.6204
321	331		1407.65	8	12.62-12.64	0.0268072	0.0635542	0.16009	0.243825	0.338102		0.00873494	0.0579819	0.165813	0.251205	0.34759	321	331	0.0180723	0.00557229	-0.00572289	-0.00737952	-0.00948795	321	331	0.0125	0.00918675	0.00436747	0.00421687	0.00421687	0.00240964	0.00271084	0.00737952	0.00451807	0.0177711						0.144578	0.0445783	-0.0457831	-0.0590361	-0.0759036	2.4589	1.00763	-1.15595	-2.06817
322	330		1097.52	6	10.26-10.31	0.0200803	0.0548193	0.141566	0.210442	0.339759		0.0126506	0.0624498	0.15261	0.226908	0.359839	322	330	0.00742972	-0.00763052	-0.0110442	-0.0164659	-0.0200803	322	330	0.00722892	0.0126506	0.00180723	0.00281124	0.00301205	0.00401606	0.00361446	0.0062249	0.00421687	0.0164659						0.0445783	-0.0457831	-0.0662651	-0.0987952	-0.120482	1.55614	-1.00453	-2.95114	-5.62736
322	331		1244.59	7	12.13-12.17	0.0311532	0.064716	0.139759	0.20241	0.310327		0.00774527	0.0423408	0.127711	0.193287	0.307573	322	331	0.0234079	0.0223752	0.0120482	0.0091222	0.00275387	322	331	0.00533563	0.00929432	0.00860585	0.00929432	0.00516351	0.00327022	0.00240964	0.010327	0.00499139	0.020654						0.163855	0.156627	0.0843373	0.0638554	0.0192771	6.47864	4.03631	1.55236	1.49767
324	330		849.405	4	7.36-7.39	0.0316265	0.0975904	0.200602	0.356024	0.500602		0.0292169	0.0861446	0.209337	0.328916	0.492771	324	330	0.00240964	0.0114458	-0.00873494	0.0271084	0.00783133	324	330	0.023494	0.0319277	0.0222892	0.0240964	0.00933735	0.00873494	0.0120482	0.0060241	0.0120482	0.0262048						0.00963855	0.0457831	-0.0349398	0.108434	0.0313253	0.16651	0.580937	-0.655266	1.74284
330	345		1865.99	14	7.19-7.27	0.0227194	0.111532	0.472117	0.67358	0.70938		0.0196213	0.135972	0.519191	0.704647	0.728227	330	345	0.00309811	-0.0244406	-0.047074	-0.0310671	-0.0188468	330	345	0.0142857	0.0192771	0.029346	0.0111876	0.0045611	0.0246127	0.0316695	0.0130809	0.0177281	0.022031						0.0433735	-0.342169	-0.659036	-0.43494	-0.263855	0.18856	-1.1418	-2.5377	-2.5669
331	337		854.454	5	9.30-9.39	0.0657831	0.33494	0.54506	0.678554	0.712289		0.053494	0.357831	0.569157	0.735181	0.736145	331	337	0.0122892	-0.0228916	-0.0240964	-0.0566265	-0.0238554	331	337	0.00795181	0.0257831	0.00819277	0.000963855	0.00698795	0.0086747	0.0142169	0.0224096	0.0115663	0.039759						0.0614458	-0.114458	-0.120482	-0.283133	-0.119277	1.80878	-1.34665	-1.74919	-8.45054
379	386		820.436	6	10.35-10.40	-0.00502008	-0.00220884	0.00923695	0.0341365	0.147992		-0.00963855	-0.00401606	0.00702811	0.0363454	0.149398	379	386	0.00461847	0.00180723	0.00220884	-0.00220884	-0.00140562	379	386	0.00100402	0.00502008	0.00963855	0.00542169	0.00361446	0.00180723	0.00281124	0.00120482	0.00180723	0.0118474						0.0277108	0.0108434	0.013253	-0.013253	-0.00843373	3.86933	0.544041	0.393863	-0.669439
387	396		1197.61	8	7.22-7.30	0.0393072	0.0831325	0.166114	0.293524	0.398193		0.0391566	0.0962349	0.174096	0.316416	0.416416	387	396	0.000150602	-0.0131024	-0.00798193	-0.0228916	-0.0182229	387	396	0.00873494	0.0143072	0.0063253	0.0108434	0.0063253	0.00963855	0.014006	0.00918675	0.00978916	0.025753						0.00120482	-0.104819	-0.0638554	-0.183133	-0.145783	0.0200535	-1.13348	-1.2395	-2.71414
387	398		1339.68	10	6.95-7.00	0.0184337	0.049759	0.123976	0.212771	0.308072		0.0177108	0.0518072	0.118434	0.236747	0.324096	387	398	0.000722892	-0.00204819	0.00554217	-0.0239759	-0.0160241	387	398	0.00554217	0.00253012	0.0224096	0.00554217	0.0073494	0.00325301	0.0026506	0.00240964	0.0060241	0.0280723						0.00722892	-0.0204819	0.0554217	-0.239759	-0.160241	0.194837	-0.968141	0.425902	-5.07319
389	398		1110.57	8	8.81-8.89	0.0439759	0.107078	0.156627	0.16506	0.170331		0.0385542	0.115361	0.153916	0.174849	0.170331	389	398	0.00542169	-0.00828313	0.00271084	-0.00978916	0	389	398	0.00707831	0.00888554	0.0060241	0.00436747	0.00316265	0.00391566	0.00707831	0.00737952	0.00798193	0.0125						0.0433735	-0.0662651	0.0216867	-0.0783133	0	1.16089	-1.26289	0.492889	-1.86349
399	408		1173.72	7	9.62-9.65	-0.00757315	-0.00636833	-0.0070568	0.00481928	0.072117		0.00688468	0.0134251	0.0165232	0.0275387	0.0815835	399	408	-0.0144578	-0.0197935	-0.02358	-0.0227194	-0.00946644	399	408	0.0165232	0.00447504	0.00981067	0.011704	0.00189329	0.00843373	0.0256454	0.0163511	0.0137694	0.0127367						-0.101205	-0.138554	-0.16506	-0.159036	-0.0662651	-1.34987	-1.31692	-2.14185	-2.17753
401	409		1044.68	6	9.11-9.18	0.00100402	-0.00120482	0.00200803	0.0130522	0.0823293		-0.00381526	-0.00180723	-0.00060241	0.0100402	0.0869478	401	409	0.00481928	0.00060241	0.00261044	0.00301205	-0.00461847	401	409	0.00381526	0.00301205	0.00401606	0.00682731	0.00421687	0.00180723	0.0062249	0.00281124	0.00160643	0.00863454						0.0289157	0.00361446	0.0156627	0.0180723	-0.0277108	1.97725	0.150883	0.922318	0.743827
401	411		1230.78	8	9.42-9.48	0.0337349	0.175602	0.221386	0.23494	0.292169		0.0274096	0.182982	0.22244	0.249247	0.298645	401	411	0.0063253	-0.00737952	-0.00105422	-0.0143072	-0.0064759	401	411	0.00391566	0.0123494	0.00180723	0.00316265	0.00406627	0.00105422	0.00542169	0.00783133	0.00331325	0.0177711						0.0506024	-0.0590361	-0.00843373	-0.114458	-0.0518072	2.70172	-0.947697	-0.22719	-5.4102
402	409		931.597	5	8.13-8.27	0.00168675	0.00409639	0.0060241	0.0125301	0.0860241		0.000963855	0.0060241	0.00361446	0.0159036	0.0893976	402	409	0.000722892	-0.00192771	0.00240964	-0.00337349	-0.00337349	402	409	0.00168675	0.00457831	0.00240964	0.00457831	0.00192771	0.00457831	0.00240964	0.00289157	0.0053012	0.00578313						0.00361446	-0.00963855	0.0120482	-0.0168675	-0.0168675	0.25662	-0.645357	1.10883	-0.834181
404	411		891.529	5	6.80-6.90	0.0561446	0.283614	0.366988	0.39759	0.468916		0.0378313	0.287711	0.361687	0.40241	0.460964	404	411	0.0183133	-0.00409639	0.0053012	-0.00481928	0.00795181	404	411	0.00361446	0.0214458	0.0053012	0.00120482	0.00120482	0.00457831	0.013253	0.0154217	0.00722892	0.0306024						0.0915663	-0.0204819	0.026506	-0.0240964	0.039759	5.43783	-0.281437	0.563055	-1.13899
415	422		989.555	5	9.58-9.62	0.000481928	-0.000481928	0.0026506	0.00385542	0.0185542		0.000481928	0.000963855	0.0026506	0.00650602	0.0214458	415	422	0	-0.00144578	0	-0.0026506	-0.00289157	415	422	0.00240964	0.00554217	0.00409639	0.000722892	0.00433735	0.00192771	0.00385542	0.000240964	0.00216867	0.000481928						0	-0.00722892	0	-0.013253	-0.0144578	0	-0.370917	0	-2.00832
415	425		1386.77	8	11.04-11.08	0.00406627	0.00587349	0.0128012	0.0347892	0.0831325		0.00451807	0.0106928	0.0143072	0.0436747	0.0829819	415	425	-0.000451807	-0.00481928	-0.00150602	-0.00888554	0.000150602	415	425	0.00331325	0.00391566	0.00527108	0.00587349	0.00587349	0.00406627	0.00466867	0.00165663	0.0115964	0.0060241						-0.00361446	-0.0385542	-0.0120482	-0.0710843	0.00120482	-0.149194	-1.36989	-0.472104	-1.18395
415	437		2668.41	19	9.30-9.40	-0.00298034	0.0171211	0.0378567	0.0618897	0.118199		0.018643	0.0353836	0.0675333	0.0897907	0.158719	415	437	-0.0216233	-0.0182625	-0.0296766	-0.0279011	-0.04052	415	437	0.00443881	0.0183259	0.00913126	0.00729233	0.0175016	0.000317058	0.00374128	0.00259987	0.0038681	0.014331						-0.410843	-0.346988	-0.563855	-0.53012	-0.76988	-8.41612	-1.69117	-5.41399	-5.85436
416	425		1273.68	7	10.86-10.91	-0.019105	-0.00929432	0.00292599	0.030809	0.0702238		-0.00481928	0.00895009	0.0137694	0.0459552	0.095525	416	425	-0.0142857	-0.0182444	-0.0108434	-0.0151463	-0.0253012	416	425	0.000860585	0.0110155	0.00757315	0.010327	0.00189329	0.00172117	0.00172117	0.000344234	0.00275387	0.0060241						-0.1	-0.127711	-0.0759036	-0.106024	-0.177108	-12.8583	-2.83432	-2.47742	-2.45457
422	428		844.408	5	10.22-10.27	0.00120482	0	0.000240964	0.00289157	0.00240964		-0.00337349	0.0026506	-0.00240964	-0.000240964	-0.00168675	422	428	0.00457831	-0.0026506	0.0026506	0.00313253	0.00409639	422	428	0.00409639	0.00457831	0.000963855	0.00409639	0.00216867	0.00313253	0.0053012	0.00168675	0.00192771	0.00385542						0.0228916	-0.013253	0.013253	0.0156627	0.0204819	1.53773	-0.655428	2.36318	1.19844
423	435		1496.78	10	7.01-7.07	0.0409639	0.0654217	0.123735	0.15241	0.208795		0.0280723	0.0678313	0.142169	0.159639	0.218795	423	435	0.0128916	-0.00240964	-0.0184337	-0.00722892	-0.01	423	435	0.00445783	0.00638554	0.00590361	0.00590361	0.00337349	0.00409639	0.00542169	0.023253	0.00481928	0.0175904						0.128916	-0.0240964	-0.184337	-0.0722892	-0.1	3.68819	-0.498239	-1.33085	-1.64296
424	435		1383.7	9	5.99-6.04	0.047925	0.0784471	0.136278	0.175502	0.246319		0.0289157	0.0677376	0.137216	0.177242	0.244712	424	435	0.0190094	0.0107095	-0.000937082	-0.00174029	0.00160643	424	435	0.0100402	0.0167336	0.00963855	0.00829987	0.0215529	0.0139224	0.00254351	0.00977242	0.00481928	0.0210174						0.171084	0.0963855	-0.00843373	-0.0156627	0.0144578	1.91816	1.09592	-0.118248	-0.314067
426	435		1099.57	7	5.49-5.53	0.0652324	0.118244	0.182272	0.221343	0.301549		0.0428571	0.110499	0.187435	0.234251	0.30809	426	435	0.0223752	0.00774527	-0.00516351	-0.0129088	-0.00654045	426	435	0.00671256	0.00877797	0.00774527	0.0104991	0.00430293	0.00361446	0.00757315	0.00395869	0.0139415	0.0196213						0.156627	0.0542169	-0.0361446	-0.0903614	-0.0457831	5.0834	1.15715	-1.02819	-1.2811
429	437		983.551	6	5.07-5.12	0.00361446	0.0283133	0.118876	0.153213	0.155622		-0.0108434	0.0359438	0.124096	0.140361	0.140161	429	437	0.0144578	-0.00763052	-0.00522088	0.0128514	0.0154618	429	437	0.00823293	0.00883534	0.00341365	0.00943775	0.00542169	0.00240964	0.0064257	0.0182731	0.00883534	0.0180723						0.086747	-0.0457831	-0.0313253	0.0771084	0.0927711	2.91919	-1.20976	-0.486456	1.72178
438	444		829.538	5	5.87-5.95	0.0115663	0.00650602	0.0163855	0.00795181	0.0125301		-0.000963855	0.00481928	0.000722892	0.00674699	0.0110843	438	444	0.0125301	0.00168675	0.0156627	0.00120482	0.00144578	438	444	0.00289157	0.00554217	0.000963855	0.00554217	0.00337349	0.00457831	0.00506024	0.00722892	0.00506024	0.00433735						0.0626506	0.00843373	0.0783133	0.0060241	0.00722892	4.00791	0.38929	3.71986	0.278064
438	445		942.623	6	7.32-7.36	0.00421687	0.000401606	0.00783133	0.0210843	0.0331325		-0.00763052	0.0062249	0.00843373	0.00803213	0.0283133	438	445	0.0118474	-0.00582329	-0.00060241	0.0130522	0.00481928	438	445	0.00542169	0.00562249	0.00863454	0.0108434	0.0062249	0.00240964	0.00763052	0.00903614	0.00321285	0.0126506						0.0710843	-0.0349398	-0.00361446	0.0783133	0.0289157	3.45864	-1.06415	-0.0834838	1.99898
438	446		1013.66	7	6.95-7.03	0.00120482	0.00258176	-0.000688468	0.00671256	0.041136		-0.00327022	-0.00740103	-0.00154905	-0.00223752	0.0423408	438	446	0.00447504	0.00998279	0.000860585	0.00895009	-0.00120482	438	446	0.0020654	0.00585198	0.00619621	0.00740103	0.00654045	0.0060241	0.00516351	0.0020654	0.00395869	0.00447504						0.0313253	0.0698795	0.0060241	0.0626506	-0.00843373	1.21712	2.21553	0.228218	1.84696
438	447		1126.74	8	8.91-9.00	-0.000451807	-0.00195783	0.0158133	0.0826807	0.152861		-0.00376506	0.00180723	0.0171687	0.096988	0.16747	438	447	0.00331325	-0.00376506	-0.00135542	-0.0143072	-0.0146084	438	447	0.00391566	0.00496988	0.000451807	0.00180723	0.00331325	0.00271084	0.00331325	0.000150602	0.000903614	0.00361446						0.026506	-0.0301205	-0.0108434	-0.114458	-0.116867	1.20499	-1.09178	-4.9295	-12.2644
439	447		1013.66	7	8.14-8.26	-0.00120482	0.00120482	0.0172117	0.0901893	0.172117		-0.00137694	0.000860585	0.0192771	0.106024	0.182788	439	447	0.000172117	0.000344234	-0.0020654	-0.0158348	-0.0106713	439	447	0.00154905	0.00636833	0.00120482	0.00137694	0.00292599	0.00189329	0.00309811	0.00361446	0.00378657	0.00654045						0.00120482	0.00240964	-0.0144578	-0.110843	-0.0746988	0.121867	0.0841903	-0.938953	-6.80704
441	447		756.511	5	8.73-8.82	-0.00240964	-0.00626506	0.0231325	0.122892	0.231566		0	0.00240964	0.0279518	0.16	0.254699	441	447	-0.00240964	-0.0086747	-0.00481928	-0.0371084	-0.0231325	441	447	0.00385542	0.00746988	0.00216867	0.00385542	0.00915663	0.00481928	0.00313253	0.00506024	0.00361446	0.0178313						-0.0120482	-0.0433735	-0.0240964	-0.185542	-0.115663	-0.676252	-1.85491	-1.5162	-12.1621
446	464		2258.23	15	10.66-10.70	0.0590361	0.114538	0.21992	0.3551	0.485783		0.0698795	0.149719	0.264257	0.416305	0.568353	446	464	-0.0108434	-0.0351807	-0.0443373	-0.0612048	-0.0825703	446	464	0.0116466	0.00963855	0.0165462	0.0075502	0.00417671	0.00409639	0.0179116	0.0141365	0.00843373	0.0015261						-0.162651	-0.527711	-0.66506	-0.918072	-1.23855	-1.52125	-2.99576	-3.52871	-9.36516
447	462		1961.03	12	8.56-8.59	0.112651	0.183534	0.313454	0.472791	0.590161		0.0952811	0.201205	0.340361	0.52751	0.642671	447	462	0.0173695	-0.0176707	-0.0269076	-0.0547189	-0.05251	447	462	0.0125502	0.0176707	0.00702811	0.00953815	0.00893574	0.00823293	0.0143574	0.0116466	0.010743	0.0216867						0.208434	-0.212048	-0.322892	-0.656627	-0.63012	2.00437	-1.34427	-3.42615	-6.59714
447	470		2775.53	19	11.16-11.21	0.0689918	0.104502	0.18643	0.291947	0.424604		0.0590996	0.112873	0.192771	0.325808	0.456944	447	470	0.0098922	-0.00837032	-0.00634115	-0.0338618	-0.0323399	447	470	0.0088142	0.0115409	0.00684845	0.00405834	0.00259987	0.00519975	0.00450222	0.0027267	0.0093215	0.0336715						0.187952	-0.159036	-0.120482	-0.643373	-0.614458	1.67426	-1.17031	-1.48999	-5.7689
448	468		2412.31	16	10.78-10.83	0.094503	0.124172	0.221837	0.351431	0.450151		0.0506024	0.106099	0.196611	0.336596	0.468976	448	468	0.0439006	0.0180723	0.0252259	0.0148343	-0.0188253	448	468	0.011747	0.00948795	0.0141566	0.00798193	0.00391566	0.00625	0.00707831	0.0060241	0.0126506	0.0164157						0.70241	0.289157	0.403614	0.237349	-0.301205	5.7145	2.64434	2.83994	1.7177
448	470		2662.45	18	11.00-11.11	0.0593708	0.089759	0.166064	0.278648	0.432062		0.0481258	0.0966533	0.173762	0.316131	0.475837	448	470	0.011245	-0.00689424	-0.00769746	-0.0374833	-0.0437751	448	470	0.00937082	0.00863454	0.00736278	0.00615797	0.00414993	0.00562249	0.0064257	0.00796519	0.00763052	0.0238956						0.20241	-0.124096	-0.138554	-0.674699	-0.787952	1.78227	-1.10945	-1.22914	-6.62116
458	470		1497.82	9	11.85-11.92	0.0307898	0.0396252	0.0493976	0.103213	0.232664		0.029585	0.0417671	0.0440428	0.116466	0.294244	458	470	0.00120482	-0.0021419	0.00535475	-0.013253	-0.0615797	458	470	0.0123159	0.0021419	0.00870147	0.0153949	0.0151272	0.0103079	0.00174029	0.00736278	0.011245	0.016332						0.0108434	-0.0192771	0.0481928	-0.119277	-0.554217	0.129935	-1.34427	0.813676	-1.20407
462	470		995.58	6	10.64-10.69	0.0311245	0.0393574	0.0443775	0.0859438	0.268876		0.0212851	0.0451807	0.0483936	0.117068	0.309036	462	470	0.00983936	-0.00582329	-0.00401606	-0.0311245	-0.0401606	462	470	0.00281124	0.00160643	0.00180723	0.00180723	0.00783133	0.0106426	0.00662651	0.0108434	0.0160643	0.0226908						0.0590361	-0.0349398	-0.0240964	-0.186747	-0.240964	1.54823	-1.47926	-0.632772	-3.33481
463	470		832.517	5	9.43-9.48	0.0479518	0.0549398	0.0689157	0.11494	0.349398		0.0375904	0.0573494	0.066747	0.146024	0.383133	463	470	0.0103614	-0.00240964	0.00216867	-0.0310843	-0.0337349	463	470	0.0060241	0.00939759	0.0060241	0.00361446	0.00433735	0.0086747	0.00963855	0.00506024	0.00361446	0.0322892						0.0518072	-0.0120482	0.0108434	-0.155422	-0.168675	1.69928	-0.310037	0.477446	-10.5328
465	476		1207.58	10	6.74-6.81	0.046747	0.0937349	0.128916	0.248554	0.440241		0.046506	0.110723	0.137229	0.272289	0.450964	465	476	0.000240964	-0.016988	-0.00831325	-0.0237349	-0.0107229	465	476	0.0104819	0.0101205	0.0039759	0.00301205	0.0143373	0.00240964	0.0112048	0.00554217	0.0104819	0.0395181						0.00240964	-0.16988	-0.0831325	-0.237349	-0.107229	0.0388051	-1.94877	-2.11104	-3.76946
471	477		732.329	5	6.17-6.23	0.0990361	0.15759	0.281928	0.313976	0.317831		0.0787952	0.168193	0.278072	0.333253	0.319036	471	477	0.020241	-0.0106024	0.00385542	-0.0192771	-0.00120482	471	477	0.019759	0.0156627	0.0110843	0.0171084	0.00722892	0.0127711	0.0161446	0.0175904	0.0106024	0.0253012						0.101205	-0.053012	0.0192771	-0.0963855	-0.0060241	1.49013	-0.816403	0.32118	-1.65888
474	482		1020.56	7	8.28-8.39	0.0158348	0.0743546	0.273838	0.517728	0.532874		0.00877797	0.0915663	0.32031	0.552151	0.544234	474	482	0.0070568	-0.0172117	-0.0464716	-0.0344234	-0.0113597	474	482	0.0137694	0.0091222	0.00860585	0.0118761	0.00378657	0.0020654	0.0060241	0.0108434	0.00998279	0.0380379						0.0493976	-0.120482	-0.325301	-0.240964	-0.0795181	0.877855	-2.72705	-5.81441	-3.84308
498	510		1558.77	11	9.72-9.78	0.0418401	0.0741512	0.166265	0.218839	0.251588		0.0337349	0.0950712	0.176451	0.247097	0.252355	498	510	0.00810515	-0.02092	-0.0101862	-0.0282585	-0.000766703	498	510	0.0105148	0.00810515	0.0156627	0.00251917	0.00920044	0.00317634	0.00974808	0.0100767	0.00799562	0.0184009						0.0891566	-0.23012	-0.112048	-0.310843	-0.00843373	1.27808	-2.85818	-0.947321	-5.83856
508	515		959.347	5	4.43-4.48	0.245783	0.341687	0.36988	0.392048	0.39012		0.195422	0.34241	0.344337	0.405542	0.384096	508	515	0.0503614	-0.000722892	0.0255422	-0.013494	0.0060241	508	515	0.0385542	0.0431325	0.0192771	0.0253012	0.0113253	0.0255422	0.0387952	0.033494	0.0253012	0.0414458						0.251807	-0.00361446	0.127711	-0.0674699	0.0301205	1.88613	-0.0215829	1.14478	-0.653197
515	530		1844.81	13	8.40-8.47	0.344393	0.390547	0.496015	0.621223	0.742539		0.32975	0.400185	0.506024	0.677294	0.767655	515	530	0.0146432	-0.00963855	-0.0100093	-0.0560704	-0.0251158	515	530	0.0151993	0.00936052	0.0111214	0.0119555	0.00417053	0.0012975	0.0113068	0.0167748	0.0116775	0.0329008						0.190361	-0.125301	-0.13012	-0.728916	-0.326506	1.66264	-1.13733	-0.861376	-5.81113
516	530		1715.76	12	8.08-8.18	0.14006	0.261345	0.299197	0.348594	0.410341		0.123695	0.277108	0.305823	0.392771	0.44006	516	530	0.0163655	-0.0157631	-0.00662651	-0.0441767	-0.0297189	516	530	0.0189759	0.0242972	0.0131526	0.0134538	0.00532129	0.0134538	0.0208835	0.0119478	0.0155622	0.0201807						0.196386	-0.189157	-0.0795181	-0.53012	-0.356627	1.21858	-0.852171	-0.645922	-3.71952
518	525		866.388	5	4.96-5.02	0.0648193	0.099759	0.11759	0.206988	0.43012		0.0431325	0.0862651	0.0949398	0.233253	0.442892	518	525	0.0216867	0.013494	0.0226506	-0.0262651	-0.0127711	518	525	0.0159036	0.013494	0.00674699	0.0103614	0.0125301	0.00144578	0.0118072	0.00385542	0.0118072	0.0306024						0.108434	0.0674699	0.113253	-0.131325	-0.0638554	2.35219	1.3035	5.04861	-2.89596
519	530		1358.61	9	7.42-7.48	0.110977	0.214056	0.259839	0.315395	0.40241		0.0962517	0.227711	0.258768	0.359973	0.421954	519	530	0.0147256	-0.0136546	0.00107095	-0.0445783	-0.0195448	519	530	0.0128514	0.0208835	0.0135207	0.016332	0.00589023	0.00615797	0.0199465	0.0131191	0.0190094	0.0396252						0.13253	-0.122892	0.00963855	-0.401205	-0.175904	1.78978	-0.818958	0.0984608	-3.08087
530	542		1521.83	11	8.45-8.53	0.165717	0.26276	0.36035	0.423001	0.415553		0.156298	0.284228	0.369551	0.458488	0.424754	530	542	0.0094195	-0.0214677	-0.00920044	-0.0354874	-0.00920044	530	542	0.0147864	0.0277108	0.0157722	0.00887185	0.00887185	0.0129244	0.0258488	0.0278204	0.0204819	0.0272727						0.103614	-0.236145	-0.101205	-0.390361	-0.101205	0.83076	-0.981207	-0.498296	-2.75375
545	556		1355.73	9	9.39-9.46	0.133199	0.149933	0.178447	0.223427	0.31834		0.10589	0.170683	0.183668	0.240562	0.331727	545	556	0.0273092	-0.0207497	-0.00522088	-0.0171352	-0.0133869	545	556	0.0105756	0.0202142	0.00789826	0.00843373	0.00348059	0.0137885	0.011245	0.0188755	0.0136546	0.0223561						0.245783	-0.186747	-0.046988	-0.154217	-0.120482	2.72202	-1.55371	-0.441947	-1.84926
545	564		2270.19	17	11.37-11.40	0.161871	0.274061	0.331892	0.384479	0.493125		0.139192	0.287243	0.347626	0.401772	0.495039	545	564	0.022679	-0.0131821	-0.0157335	-0.0172927	-0.00191354	545	564	0.0165131	0.0165131	0.00524451	0.00290574	0.00496102	0.0109851	0.0141743	0.0128278	0.0147413	0.0362155						0.385542	-0.224096	-0.26747	-0.293976	-0.0325301	1.98057	-1.04916	-1.9664	-1.99347
550	556		814.491	5	7.78-7.85	0.00144578	0.0922892	0.221446	0.357108	0.395181		0.00506024	0.0587952	0.199518	0.372771	0.442892	550	556	-0.00361446	0.033494	0.0219277	-0.0156627	-0.0477108	550	556	0.00795181	0.0253012	0.0185542	0.0318072	0.00578313	0.00361446	0.0187952	0.0144578	0.0137349	0.0228916						-0.0180723	0.16747	0.109639	-0.0783133	-0.238554	-0.716728	1.84062	1.61465	-0.783019
553	566		1604.84	12	7.65-7.72	0.0111446	0.0322289	0.0784137	0.124197	0.174197		0.00783133	0.0274096	0.0644578	0.101305	0.182631	553	566	0.00331325	0.00481928	0.0139558	0.0228916	-0.00843373	553	566	0.00150602	0.00391566	0.00953815	0.00251004	0.00742972	0.00190763	0.00261044	0.00763052	0.0110442	0.025502						0.039759	0.0578313	0.16747	0.274699	-0.101205	2.36116	1.77373	1.97893	3.50079
561	576		1865.99	14	7.20-7.32	0.0297762	0.106024	0.438554	0.640448	0.663941		0.00895009	0.137349	0.491308	0.681756	0.668158	561	576	0.0208262	-0.0313253	-0.0527539	-0.0413081	-0.00421687	561	576	0.0215146	0.0167814	0.0224613	0.0236661	0.0114458	0.0143718	0.0236661	0.00826162	0.00920826	0.0432014						0.291566	-0.438554	-0.738554	-0.578313	-0.0590361	1.39418	-1.87015	-3.81793	-2.81746
568	577		1146.61	8	6.61-6.74	0.117169	0.209337	0.332982	0.460843	0.556175		0.0893072	0.200151	0.321536	0.514157	0.597289	568	577	0.0278614	0.00918675	0.0114458	-0.0533133	-0.0411145	568	577	0.0129518	0.0195783	0.0131024	0.00572289	0.00557229	0.00677711	0.0100904	0.0114458	0.0131024	0.0453313						0.222892	0.073494	0.0915663	-0.426506	-0.328916	3.30129	0.722429	1.1395	-6.45846
574	589		1872.94	14	10.52-10.60	0.0263339	0.0962995	0.147504	0.186145	0.257917		0.0223752	0.105594	0.152238	0.199914	0.265146	574	589	0.00395869	-0.00929432	-0.00473322	-0.0137694	-0.00722892	574	589	0.00197935	0.00886403	0.00576592	0.00447504	0.00662651	0.00413081	0.00697074	0.00550775	0.00722892	0.0188468						0.0554217	-0.13012	-0.0662651	-0.192771	-0.101205	1.49691	-1.42758	-1.02814	-2.80515
575	589		1758.9	13	10.50-10.70	0.0278962	0.0820204	0.148285	0.209175	0.309639		0.0335496	0.0977757	0.146525	0.221872	0.317424	575	589	-0.00565338	-0.0157553	0.00176089	-0.0126969	-0.00778499	575	589	0.0118628	0.0111214	0.0137164	0.00667285	0.00982391	0.0191844	0.0162187	0.00658017	0.0094532	0.0235403						-0.073494	-0.204819	0.0228916	-0.16506	-0.101205	-0.434119	-1.38766	0.200482	-1.90058
578	584		847.426	5	9.73-9.79	0.0026506	0.00481928	0.0257831	0.115663	0.256867		-0.000481928	0.00698795	0.0636145	0.221446	0.363133	578	584	0.00313253	-0.00216867	-0.0378313	-0.105783	-0.106265	578	584	0.00361446	0.00698795	0.00240964	0.00313253	0.00506024	0.00771084	0.00192771	0.00626506	0.00578313	0.019759						0.0156627	-0.0108434	-0.189157	-0.528916	-0.531325	0.637122	-0.518178	-9.76179	-27.8578
578	585		960.51	6	11.12-11.16	-0.00140562	-0.00562249	0.0184739	0.0773092	0.195783		-0.00502008	0.00361446	0.0403614	0.155422	0.335141	578	585	0.00361446	-0.00923695	-0.0218876	-0.0781124	-0.139357	578	585	0.00301205	0.00863454	0.00341365	0.00763052	0.00180723	0.00341365	0.00783133	0.00582329	0.00682731	0.0176707						0.0216867	-0.0554217	-0.131325	-0.468675	-0.836145	1.37515	-1.37247	-5.61627	-13.2137
579	585		847.426	5	9.74-9.79	0.00168675	0.00819277	0.0250602	0.115181	0.256627		-0.000481928	0.00457831	0.0631325	0.224337	0.362651	579	585	0.00216867	0.00361446	-0.0380723	-0.109157	-0.106024	579	585	0.00361446	0.00216867	0.00240964	0.00289157	0.00433735	0.00746988	0.00144578	0.0053012	0.00313253	0.0195181						0.0108434	0.0180723	-0.190361	-0.545783	-0.53012	0.452648	2.40192	-11.3243	-44.3493
582	597		1945.98	14	10.02-10.08	0.0375215	0.0931153	0.120224	0.164544	0.235456		0.0324441	0.0957831	0.119535	0.196041	0.277367	582	597	0.00507745	-0.00266781	0.000688468	-0.0314974	-0.0419105	582	597	0.00516351	0.0123924	0.00318417	0.00765921	0.00507745	0.00387263	0.00585198	0.00421687	0.00757315	0.0091222						0.0710843	-0.0373494	0.00963855	-0.440964	-0.586747	1.36255	-0.337169	0.225673	-5.06497
584	597		1731.85	12	9.33-9.37	0.0404618	0.106325	0.135141	0.169177	0.221185		0.0251004	0.100301	0.122892	0.181124	0.199699	584	597	0.0153614	0.0060241	0.012249	-0.0119478	0.0214859	584	597	0.0113454	0.0126506	0.00843373	0.0060241	0.00471888	0.00552209	0.00853414	0.00953815	0.00993976	0.0175703						0.184337	0.0722892	0.146988	-0.143373	0.257831	2.10866	0.683749	1.66634	-1.78049
585	597		1584.78	11	8.60-8.67	0.0500548	0.12103	0.151479	0.193428	0.225849		0.0415115	0.124535	0.146112	0.199343	0.22092	585	597	0.00854326	-0.00350493	0.00536692	-0.00591457	0.00492881	585	597	0.00657174	0.0140197	0.0026287	0.00481928	0.00690033	0.00580504	0.00887185	0.00580504	0.00613363	0.0190581						0.0939759	-0.0385542	0.0590361	-0.0650602	0.0542169	1.68756	-0.365904	1.45874	-1.3133
585	598		1731.85	12	10.00-10.04	0.0312249	0.121586	0.141265	0.168574	0.23002		0.0172691	0.134137	0.156627	0.188253	0.271185	585	598	0.0139558	-0.0125502	-0.0153614	-0.0196787	-0.0411647	585	598	0.00251004	0.0154618	0.00341365	0.00993976	0.0126506	0.00461847	0.0161647	0.00863454	0.0164659	0.0288153						0.16747	-0.150602	-0.184337	-0.236145	-0.493976	4.59855	-0.97178	-2.86562	-1.77215
598	605		806.417	6	9.34-9.39	0.00823293	0.0588353	0.178916	0.322691	0.472892		0.00883534	0.0783133	0.192771	0.349197	0.539759	598	605	-0.00060241	-0.0194779	-0.0138554	-0.026506	-0.0668675	598	605	0.00341365	0.00441767	0.00903614	0.0106426	0.00742972	0.00381526	0.0124498	0.0140562	0.0301205	0.0383534						-0.00361446	-0.116867	-0.0831325	-0.159036	-0.401205	-0.20381	-2.55381	-1.43615	-1.43713
598	606		877.455	7	9.27-9.35	0.0129088	0.0672978	0.173838	0.355077	0.542513		0.00654045	0.0709122	0.172461	0.357659	0.579862	598	606	0.00636833	-0.00361446	0.00137694	-0.00258176	-0.0373494	598	606	0.00516351	0.00998279	0.00275387	0.00137694	0.0060241	0.00413081	0.0091222	0.00843373	0.00567986	0.0394148						0.0445783	-0.0253012	0.00963855	-0.0180723	-0.261446	1.66809	-0.462948	0.268816	-0.765134
598	607		1040.52	8	10.26-10.29	0.00978916	0.0605422	0.155723	0.320331	0.543072		0.0115964	0.0679217	0.159789	0.33238	0.58509	598	607	-0.00180723	-0.00737952	-0.00406627	-0.0120482	-0.0420181	598	607	0.00963855	0.0123494	0.00361446	0.00436747	0.014759	0.00557229	0.00963855	0.00301205	0.0106928	0.0275602						-0.0144578	-0.0590361	-0.0325301	-0.0963855	-0.336145	-0.281156	-0.815912	-1.49692	-1.80671
599	606		730.386	6	7.69-7.74	0.00763052	0.0654618	0.185542	0.378313	0.556827		0.00682731	0.0738956	0.191968	0.393976	0.60743	599	606	0.000803213	-0.00843373	-0.0064257	-0.0156627	-0.0506024	599	606	0.00321285	0.00502008	0.00522088	0.00160643	0.00381526	0.00381526	0.00321285	0.00863454	0.00682731	0.0343373						0.00481928	-0.0506024	-0.0385542	-0.0939759	-0.303614	0.278919	-2.45088	-1.10301	-3.8679
606	616		1209.6	9	11.10-11.13	0.186479	0.339759	0.453414	0.575234	0.650602		0.156091	0.370549	0.437349	0.601874	0.655288	606	616	0.0303882	-0.0307898	0.0160643	-0.0266399	-0.00468541	606	616	0.0231593	0.0227577	0.0148594	0.00455154	0.0107095	0.0182062	0.0182062	0.0216867	0.0186078	0.048996						0.273494	-0.277108	0.144578	-0.239759	-0.0421687	1.7867	-1.82986	1.05839	-2.40869
606	629		2618.32	21	11.55-11.64	0.058864	0.112048	0.215491	0.318359	0.412851		0.0506598	0.136546	0.213941	0.349053	0.434768	606	629	0.00820425	-0.024498	0.00154905	-0.0306942	-0.0219162	606	629	0.00252438	0.00877797	0.00671256	0.0144578	0.0111876	0.0064257	0.0101549	0.0115318	0.0101549	0.0267355						0.172289	-0.514458	0.0325301	-0.644578	-0.460241	2.05832	-3.16114	0.201079	-3.00909
607	616		1138.57	8	11.12-11.17	0.20512	0.374096	0.50753	0.6125	0.699247		0.175602	0.413554	0.494277	0.646536	0.718825	607	616	0.0295181	-0.0394578	0.013253	-0.0340361	-0.0195783	607	616	0.0240964	0.0338855	0.0126506	0.00918675	0.00707831	0.0177711	0.0216867	0.0168675	0.0128012	0.0474398						0.236145	-0.315663	0.106024	-0.272289	-0.156627	1.7076	-1.69876	1.08872	-3.74146
607	629		2547.29	20	11.58-11.63	0.0545783	0.111386	0.206807	0.319759	0.408313		0.0508434	0.131024	0.214096	0.346205	0.433855	607	629	0.00373494	-0.0196386	-0.00728916	-0.0264458	-0.0255422	607	629	0.0073494	0.0103012	0.00759036	0.00337349	0.00644578	0.00475904	0.00283133	0.00620482	0.00307229	0.0246386						0.0746988	-0.392771	-0.145783	-0.528916	-0.510843	0.738846	-3.18396	-1.28779	-10.0388
609	615		763.35	5	7.98-8.04	0.0383133	0.0440964	0.0472289	0.211566	0.335181		0.0349398	0.0486747	0.0718072	0.214699	0.322892	609	615	0.00337349	-0.00457831	-0.0245783	-0.00313253	0.0122892	609	615	0.0219277	0.0284337	0.0106024	0.0445783	0.0274699	0.0346988	0.0233735	0.0190361	0.026747	0.0171084						0.0168675	-0.0228916	-0.122892	-0.0156627	0.0614458	0.142352	-0.215441	-1.95373	-0.104367
615	629		1652.9	12	9.22-9.28	0.00903614	0.0245984	0.106225	0.234639	0.336546		0.00230924	0.0101406	0.114458	0.239659	0.345181	615	629	0.00672691	0.0144578	-0.00823293	-0.00502008	-0.00863454	615	629	0.00381526	0.00431727	0.00291165	0.00903614	0.00381526	0.00542169	0.0062249	0.00281124	0.00451807	0.0172691						0.0807229	0.173494	-0.0987952	-0.060241	-0.103614	1.75749	3.30562	-3.52329	-0.860663
617	626		1097.61	8	7.52-7.58	0.00406627	0.0143072	0.010241	0.0195783	0.143524		-0.00466867	0.000150602	0.00677711	0.0218373	0.168373	617	626	0.00873494	0.0141566	0.00346386	-0.00225904	-0.0248494	617	626	0.00527108	0.0123494	0.0189759	0.00361446	0.00572289	0.00391566	0.0063253	0.00421687	0.00798193	0.0121988						0.0698795	0.113253	0.0277108	-0.0180723	-0.198795	2.30408	1.7672	0.308639	-0.446553
617	629		1426.73	11	8.24-8.30	-0.0120482	-0.0041621	0.0516977	0.141731	0.23954		0.013253	0.0223439	0.0828039	0.176889	0.276561	617	629	-0.0253012	-0.026506	-0.0311062	-0.0351588	-0.0370208	617	629	0.00295728	0.00350493	0.00164294	0.00240964	0.00383352	0.0026287	0.00306681	0.00328587	0.00405257	0.0112815						-0.278313	-0.291566	-0.342169	-0.386747	-0.407229	-11.0756	-9.85773	-14.6657	-12.916
617	630		1573.8	12	10.34-10.41	0.00552209	0.00843373	0.0717871	0.172691	0.273795		0.00180723	0.0164659	0.0861446	0.180723	0.282831	617	630	0.00371486	-0.00803213	-0.0143574	-0.00803213	-0.00903614	617	630	0.00451807	0.00763052	0.00532129	0.00943775	0.00672691	0.00411647	0.00732932	0.0101406	0.00662651	0.0251004						0.0445783	-0.0963855	-0.172289	-0.0963855	-0.108434	1.05271	-1.3149	-2.17149	-1.20641
621	629		975.414	7	5.98-6.04	0.0091222	0.0270224	0.111188	0.237005	0.263855		0.0130809	0.0327022	0.135972	0.254389	0.259208	621	629	-0.00395869	-0.00567986	-0.0247849	-0.0173838	0.00464716	621	629	0.00327022	0.00688468	0.00361446	0.00189329	0.00240964	0.00258176	0.000516351	0.00843373	0.00258176	0.0141136						-0.0277108	-0.039759	-0.173494	-0.121687	0.0325301	-1.64566	-1.42494	-4.67855	-9.40468
630	636		788.516	5	9.23-9.31	-0.000963855	-0.00289157	0	0.000722892	0.0026506		-0.00192771	-0.00120482	-0.000722892	0.000481928	0.00409639	630	636	0.000963855	-0.00168675	0.000722892	0.000240964	-0.00144578	630	636	0.00361446	0.00168675	0.00144578	0.00240964	0.00192771	0.00216867	0.00409639	0.00168675	0.00144578	0.00144578						0.00481928	-0.00843373	0.00361446	0.00120482	-0.00722892	0.396059	-0.659478	0.563602	0.148522
630	637		951.579	6	9.82-9.88	-0.00441767	-0.00421687	-0.000200803	-0.00421687	-0.00361446		-0.00983936	-0.00883534	-0.00883534	-0.00903614	-0.00341365	630	637	0.00542169	0.00461847	0.00863454	0.00481928	-0.000200803	630	637	0.00120482	0.00401606	0.00481928	0.00381526	0.00120482	0.00200803	0.0064257	0.00341365	0.00200803	0.00562249						0.0325301	0.0277108	0.0518072	0.0289157	-0.00120482	4.0101	1.05568	2.53233	1.93607
630	638		1022.62	7	9.79-9.85	-0.00189329	-0.00413081	0.00172117	-0.00567986	-0.00172117		-0.0080895	-0.00860585	-0.00877797	-0.00550775	-0.00309811	630	638	0.00619621	0.00447504	0.0104991	-0.000172117	0.00137694	630	638	0.00258176	0.00533563	0.00275387	0.00172117	0.0010327	0.00172117	0.00430293	0.00361446	0.0020654	0.00154905						0.0433735	0.0313253	0.073494	-0.00120482	0.00963855	3.45877	1.13079	4.00197	-0.110883
632	638		776.48	5	9.77-9.85	0.000963855	-0.000481928	0.00144578	0.00385542	0.00746988		0.00337349	0.00674699	0.00120482	0.0026506	0.00120482	632	638	-0.00240964	-0.00722892	0.000240964	0.00120482	0.00626506	632	638	0.00168675	0.00144578	0.0053012	0.0053012	0.000481928	0.00192771	0.00144578	0.00192771	0.000722892	0.00289157						-0.0120482	-0.0361446	0.00120482	0.0060241	0.0313253	-1.62938	-6.12372	0.0739895	0.390038
633	639		776.48	5	9.78-9.84	0.00289157	0.00192771	0.00385542	0.0026506	0.0053012		0.00289157	0.00385542	0.0026506	0.00240964	0.00240964	633	639	0	-0.00192771	0.00120482	0.000240964	0.00289157	633	639	0.00240964	0.00240964	0.00554217	0.0053012	0.00337349	0.00289157	0.000722892	0.00240964	0.00216867	0.00361446						0	-0.00963855	0.0060241	0.00120482	0.0144578	0	-1.3272	0.345307	0.0728679
642	648		776.393	5	10.95-11.00	0.00674699	0.00698795	0.00746988	0.0378313	0.178554		-0.00216867	0.00192771	0.000240964	0.0298795	0.182169	642	648	0.00891566	0.00506024	0.00722892	0.00795181	-0.00361446	642	648	0.00771084	0.00987952	0.00819277	0.00674699	0.00891566	0.00240964	0.00216867	0.00409639	0.0060241	0.00650602						0.0445783	0.0253012	0.0361446	0.039759	-0.0180723	1.91152	0.866517	1.36694	1.52272
643	655		1526.79	10	8.35-8.41	0.0589157	0.125181	0.246627	0.443012	0.599759		0.0701205	0.176988	0.312651	0.567831	0.701446	643	655	-0.0112048	-0.0518072	-0.0660241	-0.124819	-0.101687	643	655	0.00710843	0.0131325	0.00975904	0.00180723	0.00445783	0.00204819	0.00963855	0.00951807	0.0128916	0.0159036						-0.112048	-0.518072	-0.660241	-1.24819	-1.01687	-2.62345	-5.50845	-8.38885	-16.6077
643	656		1673.86	11	9.88-9.93	0.0553122	0.117196	0.22793	0.413472	0.586309		0.0506024	0.138773	0.256188	0.474918	0.640635	643	656	0.00470975	-0.0215772	-0.0282585	-0.0614458	-0.0543264	643	656	0.00865279	0.0122673	0.0106243	0.0131435	0.00492881	0.00470975	0.00974808	0.0102957	0.00536692	0.00525739						0.0518072	-0.237349	-0.310843	-0.675904	-0.59759	0.828047	-2.38518	-3.30833	-7.49645
645	655		1295.72	8	7.77-7.85	0.0819277	0.15512	0.258886	0.465813	0.590211		0.0615964	0.161747	0.269277	0.50753	0.624548	645	655	0.0203313	-0.00662651	-0.0103916	-0.0417169	-0.0343373	645	655	0.0141566	0.0100904	0.00873494	0.00993976	0.00301205	0.00406627	0.00828313	0.00677711	0.0161145	0.0161145						0.162651	-0.053012	-0.0831325	-0.333735	-0.274699	2.39085	-0.87918	-1.628	-3.81631
645	656		1442.79	9	9.57-9.64	0.0528782	0.126238	0.210843	0.408969	0.568942		0.0524766	0.138019	0.231727	0.465863	0.622088	645	656	0.000401606	-0.0117805	-0.0208835	-0.0568942	-0.0531459	645	656	0.00749665	0.00937082	0.00749665	0.00977242	0.013253	0.0192771	0.0144578	0.00535475	0.0156627	0.016332						0.00361446	-0.106024	-0.187952	-0.512048	-0.478313	0.0336308	-1.1843	-3.92626	-5.33786
646	655		1182.64	7	7.04-7.10	0.0820998	0.180551	0.303614	0.541997	0.66179		0.0767642	0.192255	0.318072	0.600688	0.690189	646	655	0.00533563	-0.011704	-0.0144578	-0.0586919	-0.0283993	646	655	0.0108434	0.0134251	0.00826162	0.00895009	0.00774527	0.0144578	0.011704	0.00774527	0.010327	0.0142857						0.0373494	-0.0819277	-0.101205	-0.410843	-0.198795	0.511367	-1.13819	-2.21129	-7.43887
656	669		1543.75	10	11.44-11.48	0.00373494	0.0112048	0.0498795	0.0907229	0.10012		0.00819277	0.0192771	0.0585542	0.103614	0.109157	656	669	-0.00445783	-0.00807229	-0.0086747	-0.0128916	-0.00903614	656	669	0.00192771	0.00433735	0.00108434	0.000843373	0.00204819	0.00144578	0.00385542	0.000240964	0.0026506	0.00626506						-0.0445783	-0.0807229	-0.086747	-0.128916	-0.0903614	-3.20429	-2.4093	-13.5264	-8.02751
656	670		1729.83	11	12.62-12.64	0.00361446	0.013253	0.0444688	0.0728368	0.0765608		0.0163198	0.0484118	0.0700986	0.105915	0.125849	656	670	-0.0127054	-0.0351588	-0.0256298	-0.0330778	-0.0492881	656	670	0.0144578	0.011172	0.00843373	0.00920044	0.0185104	0.0242059	0.0101862	0.0134721	0.0162103	0.0148959						-0.139759	-0.386747	-0.281928	-0.363855	-0.542169	-0.780506	-4.02795	-2.79298	-3.07375
657	669		1396.68	9	10.74-10.83	0.0136546	0.0137885	0.060241	0.10415	0.106827		0.0139224	0.0176707	0.0647925	0.112182	0.111513	657	669	-0.000267738	-0.0038822	-0.00455154	-0.00803213	-0.00468541	657	669	0.000803213	0.00548862	0.0042838	0.00200803	0.00267738	0.00455154	0.00829987	0.00307898	0.00414993	0.00481928						-0.00240964	-0.0349398	-0.0409639	-0.0722892	-0.0421687	-0.100335	-0.67576	-1.49436	-3.01765
657	670		1582.76	10	12.23-12.27	0.00156627	0.000120482	0.0462651	0.0913253	0.0908434		0.00771084	0.0192771	0.0612048	0.108193	0.102169	657	670	-0.00614458	-0.0191566	-0.0149398	-0.0168675	-0.0113253	657	670	0.00204819	0.00361446	0.00698795	0.00337349	0.00506024	0.00373494	0.000843373	0.00506024	0.00385542	0.00638554						-0.0614458	-0.191566	-0.149398	-0.168675	-0.113253	-2.49848	-8.93974	-2.99922	-5.70282
660	669		1123.58	6	10.33-10.38	0.0162651	0.00441767	0.0793173	0.13996	0.142972		0.00281124	0.014257	0.0973896	0.136345	0.164257	660	669	0.0134538	-0.00983936	-0.0180723	0.00361446	-0.0212851	660	669	0.0114458	0.00843373	0.0186747	0.00943775	0.013253	0.00522088	0.00662651	0.00281124	0.00261044	0.0212851						0.0807229	-0.0590361	-0.108434	0.0216867	-0.127711	1.85232	-1.58893	-1.6575	0.639333
660	670		1309.66	7	11.95-12.00	0.00172117	0.0137694	0.0784854	0.13167	0.136317		-0.00550775	0.00740103	0.0784854	0.137522	0.132358	660	670	0.00722892	0.00636833	0	-0.00585198	0.00395869	660	670	0.00292599	0.00619621	0.00877797	0.00499139	0.011704	0.00223752	0.00275387	0.0060241	0.00172117	0.00895009						0.0506024	0.0445783	0	-0.0409639	0.0277108	3.3992	1.62673	0	-1.91975
662	669		939.464	5	10.27-10.31	-0.00578313	0.00409639	0.0795181	0.159518	0.158795		-0.00578313	0.0142169	0.0980723	0.169398	0.174458	662	669	0	-0.0101205	-0.0185542	-0.00987952	-0.0156627	662	669	0.000722892	0.00578313	0.00746988	0.0026506	0.00289157	0.00240964	0.00216867	0.00337349	0.00963855	0.00891566						0	-0.0506024	-0.0927711	-0.0493976	-0.0783133	0	-2.8381	-3.92089	-1.7118
670	678		1067.56	7	10.74-10.83	0.0246127	0.0270224	0.0251291	0.0184165	0.0314974		0.0175559	0.0339071	0.0173838	0.0232358	0.0507745	670	678	0.0070568	-0.00688468	0.00774527	-0.00481928	-0.0192771	670	678	0.0158348	0.0135972	0.0209983	0.016179	0.0189329	0.0270224	0.00963855	0.0177281	0.0173838	0.0020654						0.0493976	-0.0481928	0.0542169	-0.0337349	-0.13494	0.390252	-0.715465	0.488161	-0.351495
674	681		762.428	6	11.63-11.68	0.012249	0.0785141	0.303414	0.357831	0.378313		0.0140562	0.0941767	0.32992	0.38494	0.386747	674	681	-0.00180723	-0.0156627	-0.026506	-0.0271084	-0.00843373	674	681	0.0128514	0.0138554	0.0335341	0.0212851	0.0118474	0.010241	0.0104418	0.0253012	0.011245	0.013253						-0.0108434	-0.0939759	-0.159036	-0.162651	-0.0506024	-0.190486	-1.56365	-1.09288	-1.95045
679	691		1371.77	11	7.96-8.02	0.0365827	0.14874	0.255531	0.350274	0.482913		0.0342826	0.140854	0.255093	0.369441	0.480504	679	691	0.00230011	0.00788609	0.000438116	-0.0191676	0.00240964	679	691	0.00624315	0.00843373	0.00952903	0.0101862	0.00624315	0.00635268	0.00547645	0.00952903	0.00240964	0.0338445						0.0253012	0.086747	0.00481928	-0.210843	0.026506	0.447281	1.35833	0.0563101	-3.1717
680	689		1044.59	8	7.78-7.88	0.00165663	0.0516566	0.173645	0.278163	0.341566		0.0120482	0.0418675	0.155422	0.310392	0.375452	680	689	-0.0103916	0.00978916	0.0182229	-0.0322289	-0.0338855	680	689	0.00421687	0.00828313	0.00316265	0.0063253	0.00406627	0.00361446	0.00903614	0.00813253	0.00692771	0.021988						-0.0831325	0.0783133	0.145783	-0.257831	-0.271084	-3.24071	1.38319	3.61718	-5.95057
682	691		1058.57	8	6.57-6.62	0.0518072	0.193675	0.342922	0.480873	0.636747		0.0554217	0.210241	0.35994	0.528765	0.665813	682	691	-0.00361446	-0.0165663	-0.0170181	-0.0478916	-0.0290663	682	691	0.00376506	0.0165663	0.0149096	0.00286145	0.00978916	0.0135542	0.0129518	0.0156627	0.0100904	0.0362952						-0.0289157	-0.13253	-0.136145	-0.383133	-0.23253	-0.44503	-1.36452	-1.3631	-7.90891
682	692		1221.64	9	7.27-7.34	0.0318608	0.150602	0.27992	0.402945	0.579518		0.0338688	0.166801	0.302945	0.448594	0.608969	682	692	-0.00200803	-0.0161981	-0.0230254	-0.0456493	-0.0294511	682	692	0.00361446	0.0121821	0.00722892	0.00267738	0.00990629	0.00736278	0.00950469	0.0116466	0.0107095	0.037751						-0.0180723	-0.145783	-0.207229	-0.410843	-0.26506	-0.424038	-1.81577	-2.90941	-7.16243
693	705		1583.77	9	10.93-10.98	0.00200803	0.00200803	0.0129853	0.0451138	0.191566		0.00562249	-0.00294511	0.00803213	0.045917	0.197992	693	705	-0.00361446	0.00495315	0.00495315	-0.000803213	-0.0064257	693	705	0.00240964	0.00709505	0.00441767	0.00240964	0.00414993	0.00896921	0.0042838	0.00307898	0.00535475	0.0123159						-0.0325301	0.0445783	0.0445783	-0.00722892	-0.0578313	-0.674088	1.03513	1.59321	-0.236924
694	705		1480.76	8	10.35-10.38	0.0209337	0.0385542	0.0567771	0.101205	0.256024		0.0271084	0.047741	0.0712349	0.125301	0.274247	694	705	-0.0061747	-0.00918675	-0.0144578	-0.0240964	-0.0182229	694	705	0.00858434	0.00828313	0.0111446	0.0063253	0.00195783	0.0100904	0.0165663	0.0192771	0.00195783	0.0240964						-0.0493976	-0.073494	-0.115663	-0.192771	-0.145783	-0.807291	-0.859098	-1.12462	-6.30325
696	705		1239.58	7	10.67-10.72	0.00567986	0.00413081	0.0134251	0.0605852	0.227539		0.00533563	0.00860585	0.0141136	0.0654045	0.244234	696	705	0.000344234	-0.00447504	-0.000688468	-0.00481928	-0.0166954	696	705	0.00120482	0.00223752	0.00361446	0.0020654	0.00309811	0.000516351	0.00567986	0.00240964	0.0020654	0.0106713						0.00240964	-0.0313253	-0.00481928	-0.0337349	-0.116867	0.454859	-1.26968	-0.274505	-2.85774
706	716		1320.85	9	9.54-9.62	0.0843373	0.137082	0.317671	0.561178	0.857965		0.0795181	0.164793	0.393708	0.682731	0.884605	706	716	0.00481928	-0.0277108	-0.0760375	-0.121553	-0.0266399	706	716	0.00441767	0.00870147	0.0140562	0.0165997	0.00468541	0.00414993	0.00615797	0.0172691	0.0195448	0.0447122						0.0433735	-0.249398	-0.684337	-1.09398	-0.239759	1.37717	-4.50248	-5.91474	-8.21033
710	716		869.57	5	7.38-7.47	0.101928	0.174217	0.352771	0.524337	0.787952		0.0881928	0.19494	0.407711	0.646988	0.875663	710	716	0.0137349	-0.0207229	-0.0549398	-0.122651	-0.0877108	710	716	0.0118072	0.0122892	0.00795181	0.00168675	0.00409639	0.00746988	0.00578313	0.0173494	0.0101205	0.0086747						0.0686747	-0.103614	-0.274699	-0.613253	-0.438554	1.70269	-2.64272	-4.98606	-20.7052
710	717		982.654	6	8.71-8.79	0.0855422	0.148594	0.293574	0.450402	0.735944		0.0771084	0.172892	0.346988	0.564257	0.827108	710	717	0.00843373	-0.0242972	-0.0534137	-0.113855	-0.0911647	710	717	0.0116466	0.011245	0.00702811	0.00763052	0.00923695	0.00702811	0.00863454	0.0156627	0.00843373	0.0305221						0.0506024	-0.145783	-0.320482	-0.683133	-0.546988	1.07387	-2.96834	-5.38906	-17.3391
717	730		1588.88	11	9.11-9.17	0.0507119	0.121577	0.189923	0.263746	0.318182		0.0452355	0.13264	0.200438	0.281051	0.333844	717	730	0.00547645	-0.0110624	-0.0105148	-0.0173056	-0.0156627	717	730	0.00547645	0.0131435	0.0075575	0.00547645	0.0041621	0.00514786	0.00788609	0.0075575	0.00722892	0.0187295						0.060241	-0.121687	-0.115663	-0.190361	-0.172289	1.26202	-1.25006	-1.70399	-3.30508
718	729		1360.77	9	8.64-8.71	0.0764391	0.175904	0.248193	0.320616	0.384337		0.0668005	0.179116	0.267336	0.367336	0.402544	718	729	0.00963855	-0.00321285	-0.0191432	-0.0467202	-0.0182062	718	729	0.0116466	0.0211513	0.0207497	0.0115127	0.0174029	0.00548862	0.0178046	0.0216867	0.00776439	0.0309237						0.086747	-0.0289157	-0.172289	-0.420482	-0.163855	1.29665	-0.201278	-1.10471	-5.82747
719	730		1388.77	9	9.68-9.74	0.0338688	0.0871486	0.172289	0.221821	0.227175		0.027577	0.0943775	0.174029	0.240562	0.229317	719	730	0.00629183	-0.00722892	-0.00174029	-0.0187416	-0.0021419	719	730	0.00414993	0.00990629	0.00615797	0.00655957	0.00187416	0.00240964	0.00749665	0.00789826	0.00696118	0.0164659						0.0566265	-0.0650602	-0.0156627	-0.168675	-0.0192771	2.27095	-1.00787	-0.300972	-3.39384
731	741		1265.7	9	7.83-7.91	0.115663	0.289157	0.360241	0.452878	0.546185		0.0977242	0.302811	0.367604	0.478447	0.568675	731	741	0.0179384	-0.0136546	-0.00736278	-0.0255689	-0.02249	731	741	0.0137885	0.0239625	0.0103079	0.00789826	0.00562249	0.0064257	0.0196787	0.0164659	0.0140562	0.04083						0.161446	-0.122892	-0.0662651	-0.23012	-0.20241	2.04245	-0.762739	-0.65647	-2.74676
734	741		918.513	6	6.37-6.44	0.151807	0.392972	0.483735	0.565462	0.628112		0.13012	0.405221	0.471687	0.582932	0.638353	734	741	0.0216867	-0.012249	0.0120482	-0.0174699	-0.010241	734	741	0.0160643	0.0463855	0.0184739	0.0114458	0.0182731	0.0200803	0.0287149	0.0240964	0.0212851	0.0443775						0.13012	-0.073494	0.0722892	-0.104819	-0.0614458	1.4607	-0.388895	0.687283	-1.25205
742	764		2757.37	17	5.49-5.60	0.0660524	0.12679	0.165982	0.221899	0.237066		0.0665485	0.152445	0.184337	0.239192	0.259036	742	764	-0.000496102	-0.0256556	-0.0183558	-0.0172927	-0.0219702	742	764	0.00921332	0.0140326	0.00857548	0.00347271	0.0176471	0.0075124	0.0136782	0.00737066	0.0141743	0.0235294						-0.00843373	-0.436145	-0.312048	-0.293976	-0.373494	-0.0722816	-2.26763	-2.81162	-2.0524
748	770		2529.31	16	7.91-7.98	0.114608	0.243373	0.377861	0.513404	0.527786		0.103916	0.267395	0.391265	0.56009	0.544955	748	770	0.0106928	-0.0240211	-0.0134036	-0.0466867	-0.0171687	748	770	0.0164157	0.0249247	0.0137801	0.00911145	0.00481928	0.0104669	0.0206325	0.0153614	0.0124247	0.0408133						0.171084	-0.384337	-0.214458	-0.746988	-0.274699	0.951293	-1.28585	-1.12498	-5.24834
771	781		1246.7	9	6.71-6.82	0.00870147	0.0844712	0.183133	0.348728	0.559438		0.000267738	0.0943775	0.198929	0.410576	0.614726	771	781	0.00843373	-0.00990629	-0.0157965	-0.0618474	-0.0552878	771	781	0.00160643	0.0105756	0.00361446	0.0038822	0.0149933	0	0.000937082	0.0123159	0.00455154	0.00722892						0.0759036	-0.0891566	-0.142169	-0.556627	-0.49759	9.09327	-1.6161	-2.13164	-17.9066
771	782		1375.74	10	6.78-6.87	0.00421687	0.080241	0.190723	0.351928	0.520843		0.00614458	0.0696386	0.197831	0.393494	0.563494	771	782	-0.00192771	0.0106024	-0.00710843	-0.0415663	-0.0426506	771	782	0.00710843	0.00963855	0.00987952	0.0086747	0.00493976	0.0013253	0.00349398	0.0103614	0.0124096	0.00325301						-0.0192771	0.106024	-0.0710843	-0.415663	-0.426506	-0.461752	1.7912	-0.859994	-4.75497
771	783		1504.78	11	6.87-6.93	0.00865279	0.0818182	0.195071	0.336473	0.508543		0.00985761	0.0929901	0.208762	0.392004	0.56977	771	783	-0.00120482	-0.011172	-0.0136911	-0.0555312	-0.0612267	771	783	0.00164294	0.00657174	0.0129244	0.00799562	0.00898138	0.00153341	0.00503834	0.0104053	0.00624315	0.0060241						-0.013253	-0.122892	-0.150602	-0.610843	-0.673494	-0.928565	-2.33676	-1.42919	-9.48147
771	784		1633.82	12	6.93-6.97	0.00843373	0.0756024	0.173394	0.310141	0.46988		0.0060241	0.0829317	0.186948	0.352108	0.523494	771	784	0.00240964	-0.00732932	-0.0135542	-0.0419679	-0.0536145	771	784	0.00210843	0.00552209	0.00732932	0.00502008	0.00552209	0.00190763	0.00311245	0.00853414	0.00742972	0.00461847						0.0289157	-0.0879518	-0.162651	-0.503614	-0.643373	1.46786	-2.0027	-2.08691	-8.1067
771	789		2174.15	17	8.40-8.46	0.207087	0.263359	0.351169	0.473069	0.564635		0.201276	0.265273	0.337562	0.493196	0.577746	771	789	0.00581148	-0.00191354	0.0136074	-0.0201276	-0.0131113	771	789	0.00212615	0.00985117	0.00389794	0.0075124	0.00262225	0.00170092	0.00836286	0.0201276	0.00255138	0.0256556						0.0987952	-0.0325301	0.231325	-0.342169	-0.222892	3.69685	-0.256485	1.1496	-4.39409
788	794		836.447	5	10.70-10.78	0.00915663	0.0604819	0.164819	0.278795	0.348675		0.0139759	0.0624096	0.161928	0.294699	0.320723	788	794	-0.00481928	-0.00192771	0.00289157	-0.0159036	0.0279518	788	794	0.00361446	0.0115663	0.00313253	0.00433735	0.0113253	0.00361446	0.00192771	0.00457831	0.00891566	0.0212048						-0.0240964	-0.00963855	0.0144578	-0.0795181	0.139759	-1.63299	-0.284747	0.902826	-2.77828
798	821		2616.36	22	6.66-6.75	0.191457	0.262705	0.292662	0.305257	0.308434		0.158872	0.273111	0.295619	0.328916	0.311665	798	821	0.0325849	-0.0104053	-0.00295728	-0.0236583	-0.00323111	798	821	0.022563	0.021851	0.0084885	0.00892662	0.00520263	0.0161555	0.01977	0.0116101	0.0110624	0.0250274						0.716867	-0.228916	-0.0650602	-0.520482	-0.0710843	2.03379	-0.611608	-0.356145	-2.88271
799	815		1876.94	15	7.61-7.66	0.211647	0.241526	0.320643	0.362651	0.404498		0.19759	0.232851	0.314618	0.370361	0.404016	799	815	0.0140562	0.0086747	0.0060241	-0.00771084	0.000481928	799	815	0.0053012	0.0123695	0.0125301	0.00859438	0.00554217	0.00875502	0.00939759	0.00497992	0.00465863	0.0216064						0.210843	0.13012	0.0903614	-0.115663	0.00722892	2.37873	0.967207	0.77384	-1.36619
804	820		1876.93	15	7.61-7.66	0.213815	0.241044	0.325221	0.36739	0.407711		0.201847	0.232851	0.312691	0.370281	0.405863	804	820	0.0119679	0.00819277	0.0125301	-0.00289157	0.00184739	804	820	0.00522088	0.00417671	0.013012	0.00875502	0.00433735	0.00899598	0.0097992	0.00385542	0.0048996	0.0219277						0.179518	0.122892	0.187952	-0.0433735	0.0277108	1.99294	1.33215	1.59918	-0.499198
814	825		1170.66	10	6.61-6.75	0.0116867	0.0451807	0.0753012	0.179398	0.248193		0.0161446	0.0516867	0.0807229	0.20506	0.259157	814	825	-0.00445783	-0.00650602	-0.00542169	-0.0256627	-0.0109639	814	825	0.00277108	0.00506024	0.00325301	0.0026506	0.00204819	0.00192771	0.000963855	0.0086747	0.00313253	0.0172289						-0.0445783	-0.0650602	-0.0542169	-0.256627	-0.109639	-2.28732	-2.18759	-1.01361	-10.8321
822	832		1099.6	9	6.97-7.04	0.125837	0.349531	0.484873	0.745783	0.802276		0.110843	0.358768	0.489023	0.770147	0.822356	822	832	0.0149933	-0.00923695	-0.00414993	-0.0243641	-0.0200803	822	832	0.0172691	0.027577	0.0200803	0.0129853	0.00709505	0.0104418	0.0240964	0.0258367	0.0267738	0.0285141						0.13494	-0.0831325	-0.0373494	-0.219277	-0.180723	1.28685	-0.436872	-0.219663	-1.41817
822	833		1212.68	10	8.80-8.86	0.0866265	0.254217	0.407108	0.62747	0.676747		0.0655422	0.260723	0.391807	0.646506	0.664458	822	833	0.0210843	-0.00650602	0.0153012	-0.0190361	0.0122892	822	833	0.0108434	0.0151807	0.0162651	0.0308434	0.0127711	0.00831325	0.0196386	0.0181928	0.023494	0.0480723						0.210843	-0.0650602	0.153012	-0.190361	0.122892	2.67277	-0.453985	1.08601	-0.850393
824	830		743.429	5	3.83-3.86	0.0115663	0.198313	0.551566	0.719036	0.691084		0.00819277	0.210361	0.581446	0.723614	0.704096	824	830	0.00337349	-0.0120482	-0.0298795	-0.00457831	-0.013012	824	830	0.00915663	0.00385542	0.0122892	0.026747	0.0159036	0.000722892	0.00843373	0.0216867	0.0166265	0.0479518						0.0168675	-0.060241	-0.149398	-0.0228916	-0.0650602	0.636145	-2.25037	-2.0762	-0.251794
826	833		900.503	6	6.53-6.60	0.0180723	0.0783133	0.132129	0.159237	0.252008		0.00923695	0.060241	0.107028	0.135542	0.243574	826	833	0.00883534	0.0180723	0.0251004	0.0236948	0.00843373	826	833	0.0156627	0.0130522	0.0124498	0.0154618	0.0263052	0.0104418	0.0144578	0.00441767	0.00863454	0.00200803						0.053012	0.108434	0.150602	0.142169	0.0506024	0.812958	1.60706	3.29099	2.31744
827	833		787.419	5	7.53-7.60	0.0959036	0.296386	0.421446	0.618554	0.658313		0.0691566	0.307711	0.42	0.639036	0.691325	827	833	0.026747	-0.0113253	0.00144578	-0.0204819	-0.033012	827	833	0.0243373	0.0209639	0.0291566	0.0139759	0.0168675	0.00578313	0.0137349	0.0173494	0.0293976	0.0537349						0.133735	-0.0566265	0.00722892	-0.10241	-0.16506	1.85197	-0.782681	0.0738083	-1.08986
834	855		2605.4	19	4.01-4.06	0.294864	0.361699	0.423716	0.448763	0.450095		0.252441	0.388396	0.409575	0.439252	0.455295	834	855	0.0424223	-0.0266963	0.0141408	0.00951173	-0.00519975	834	855	0.020799	0.0105897	0.0179455	0.0152822	0.00837032	0.0178186	0.0187698	0.0105897	0.00856056	0.0370958						0.806024	-0.507229	0.268675	0.180723	-0.0987952	2.68284	-2.14557	1.17543	0.94053
868	877		1091.58	6	7.94-8.02	0.0518072	0.109639	0.183735	0.287149	0.392169		0.0391566	0.12751	0.1751	0.309036	0.381325	868	877	0.0126506	-0.0178715	0.00863454	-0.0218876	0.0108434	868	877	0.0148594	0.00722892	0.00943775	0.0202811	0.0323293	0.02751	0.0198795	0.0140562	0.00481928	0.023494						0.0759036	-0.107229	0.0518072	-0.131325	0.0650602	0.700794	-1.46335	0.883334	-1.8186
879	899		2188.04	17	8.89-8.96	0.024876	0.0768958	0.144507	0.187739	0.231042		0.0253012	0.0993622	0.154784	0.220269	0.24961	879	899	-0.00042523	-0.0224663	-0.0102764	-0.0325301	-0.0185684	879	899	0.00595322	0.00758327	0.00942594	0.00481928	0.00843373	0.00283487	0.00134656	0.00715804	0.0105599	0.0238129						-0.00722892	-0.381928	-0.174699	-0.553012	-0.315663	-0.1117	-5.05237	-1.50385	-4.85404
913	923		1221.74	7	9.04-9.10	0.0633391	0.0824441	0.12926	0.312737	0.324785		0.0654045	0.107745	0.14957	0.296386	0.333219	913	923	-0.0020654	-0.0253012	-0.0203098	0.0163511	-0.00843373	913	923	0.00774527	0.00688468	0.00963855	0.0148021	0.0172117	0.00567986	0.0170396	0.0110155	0.00860585	0.0172117						-0.0144578	-0.177108	-0.142169	0.114458	-0.0590361	-0.372463	-2.38455	-2.40333	1.65407
914	928		1621.98	11	7.65-7.71	-0.0107338	0.0341731	0.0254107	0.0903614	0.147974		-0.00295728	0.00514786	0.0159912	0.107448	0.150602	914	928	-0.00777656	0.0290252	0.0094195	-0.0170865	-0.0026287	914	928	0.00777656	0.0166484	0.0159912	0.0162103	0.0139102	0.00230011	0.00536692	0.00591457	0.0256298	0.0121577						-0.0855422	0.319277	0.103614	-0.187952	-0.0289157	-1.66092	2.87405	0.956895	-0.97589
927	939		1505.85	10	9.56-9.60	0.0556627	0.116867	0.221205	0.301205	0.308916		0.0579518	0.143735	0.244217	0.331566	0.316627	927	939	-0.00228916	-0.0268675	-0.023012	-0.0303614	-0.00771084	927	939	0.00710843	0.0136145	0.0133735	0.00650602	0.00903614	0.00180723	0.0116867	0.0116867	0.0107229	0.0212048						-0.0228916	-0.268675	-0.23012	-0.303614	-0.0771084	-0.540582	-2.59361	-2.24421	-4.19282
945	955		1400.72	9	5.40-5.46	0.00522088	0.0258367	0.126372	0.441901	0.745783		0.00669344	0.0441767	0.176975	0.557831	0.816332	945	955	-0.00147256	-0.01834	-0.0506024	-0.11593	-0.0705489	945	955	0.00348059	0.00455154	0.01834	0.00348059	0.00776439	0.00227577	0.00937082	0.0164659	0.00910308	0.0188755						-0.013253	-0.16506	-0.455422	-1.04337	-0.63494	-0.613324	-3.04922	-3.55603	-20.6035
945	957		1585.8	11	5.45-5.52	0.0143483	0.0726177	0.210296	0.475465	0.717306		0.0115005	0.0766703	0.231763	0.550821	0.780832	945	957	0.00284775	-0.00405257	-0.0214677	-0.075356	-0.0635268	945	957	0.0033954	0.00843373	0.0109529	0.0168675	0.00646221	0.00120482	0.00372399	0.0164294	0.0125958	0.0191676						0.0313253	-0.0445783	-0.236145	-0.828916	-0.698795	1.36905	-0.761364	-1.88311	-6.20004
947	957		1329.68	9	4.66-4.71	0.0021419	0.0718876	0.250201	0.560107	0.702945		0.0121821	0.0912985	0.271486	0.61834	0.771218	947	957	-0.0100402	-0.019411	-0.0212851	-0.0582329	-0.0682731	947	957	0.0116466	0.00749665	0.00963855	0.014324	0.0113788	0.00910308	0.00361446	0.0124498	0.00495315	0.0105756						-0.0903614	-0.174699	-0.191566	-0.524096	-0.614458	-1.17643	-4.03974	-2.34153	-6.65487
948	955		1031.52	6	4.01-4.05	0.0323293	0.0413655	0.234538	0.574297	0.788956		0.0218876	0.0708835	0.235944	0.681325	0.834538	948	955	0.0104418	-0.0295181	-0.00140562	-0.107028	-0.0455823	948	955	0.0190763	0.0273092	0.0114458	0.0062249	0.00401606	0.0202811	0.0110442	0.0196787	0.0144578	0.010241						0.0626506	-0.177108	-0.00843373	-0.642169	-0.273494	0.64956	-1.73559	-0.106944	-11.7768
948	957		1216.6	8	4.22-4.26	0.0200301	0.0938253	0.268976	0.545331	0.685392		0.0165663	0.0998494	0.288102	0.606777	0.741265	948	957	0.00346386	-0.0060241	-0.0191265	-0.0614458	-0.0558735	948	957	0.00346386	0.0137048	0.0135542	0.0131024	0.011747	0.00361446	0.00225904	0.0176205	0.013253	0.0143072						0.0277108	-0.0481928	-0.153012	-0.491566	-0.446988	1.19842	-0.751204	-1.4902	-5.71072
949	966		2220.06	16	5.25-5.35	0.0325301	0.0207831	0.028238	0.0975904	0.105648		0.00474398	0.0119729	0.0329819	0.0911898	0.111145	949	966	0.0277861	0.00881024	-0.00474398	0.0064006	-0.00549699	949	966	0.00323795	0.0275602	0.014006	0.00557229	0.00308735	0.000828313	0.00368976	0.00384036	0.00542169	0.00986446						0.444578	0.140964	-0.0759036	0.10241	-0.0879518	14.3997	0.548792	-0.56578	1.42594
962	985		2805.41	17	8.07-8.14	0.0437279	0.0974486	0.189298	0.218285	0.296031		0.0296244	0.103189	0.173919	0.235507	0.305528	962	985	0.0141035	-0.00574061	0.0153792	-0.0172218	-0.00949681	962	985	0.0178597	0.0141743	0.0107016	0.0170801	0.00347271	0.00637845	0.00595322	0.00439405	0.00765415	0.0235294						0.239759	-0.0975904	0.261446	-0.292771	-0.161446	1.28809	-0.646753	2.30257	-1.59371
967	985		2158.13	12	8.78-8.87	0.20241	0.433735	0.606225	0.641165	0.646888		0.179418	0.475502	0.621687	0.695181	0.68504	967	985	0.022992	-0.0417671	-0.0154618	-0.0540161	-0.0381526	967	985	0.0233936	0.0400602	0.0181727	0.0168675	0.0104418	0.0193775	0.0240964	0.0232932	0.0185743	0.00572289						0.275904	-0.501205	-0.185542	-0.648193	-0.457831	1.31098	-1.54747	-0.906484	-3.7289
970	985		1844.01	9	8.55-8.63	0.148059	0.4249	0.606292	0.680857	0.642303		0.166399	0.458902	0.614726	0.702811	0.666934	970	985	-0.01834	-0.0340027	-0.00843373	-0.0219545	-0.0246319	970	985	0.0141901	0.0199465	0.0176707	0.00522088	0.00896921	0.0157965	0.0261044	0.0190094	0.0211513	0.0423025						-0.16506	-0.306024	-0.0759036	-0.19759	-0.221687	-1.49598	-1.79268	-0.562829	-1.74544
986	997		1340.69	10	4.02-4.08	0.0459036	0.0649398	0.0753012	0.0856627	0.0998795		0.0392771	0.0659036	0.0724096	0.0889157	0.096506	986	997	0.00662651	-0.000963855	0.00289157	-0.00325301	0.00337349	986	997	0.0060241	0.00192771	0.0046988	0.00445783	0.00554217	0.00192771	0.00686747	0.00361446	0.00626506	0.0106024						0.0662651	-0.00963855	0.0289157	-0.0325301	0.0337349	1.81461	-0.234049	0.84484	-0.732769
986	1004		2196.15	17	4.86-4.94	0.0419561	0.0686747	0.102906	0.110631	0.120695		0.0323175	0.0698086	0.100921	0.115521	0.119064	986	1004	0.00963855	-0.00113395	0.00198441	-0.00489015	0.00163005	986	1004	0.00538625	0.0080085	0.00432318	0.00361446	0.00255138	0.00354359	0.00644933	0.00503189	0.0037562	0.0140326						0.163855	-0.0192771	0.0337349	-0.0831325	0.0277108	2.58934	-0.191009	0.518104	-1.62484
986	1007		2533.33	20	5.37-5.44	0.0288554	0.0564458	0.104518	0.121145	0.12759		0.0225904	0.060241	0.10494	0.129819	0.130301	986	1007	0.00626506	-0.00379518	-0.000421687	-0.0086747	-0.00271084	986	1007	0.0039759	0.0076506	0.00409639	0.00421687	0.00126506	0.00331325	0.00668675	0.00403614	0.00825301	0.0113253						0.125301	-0.0759036	-0.00843373	-0.173494	-0.0542169	2.0967	-0.646934	-0.127007	-1.62119
987	1007		2434.26	19	5.38-5.44	0.0291059	0.0447685	0.0949271	0.108624	0.1078		0.0230818	0.0593532	0.10799	0.128852	0.125174	987	1007	0.0060241	-0.0145847	-0.0130628	-0.0202283	-0.0173748	987	1007	0.0117945	0.0144578	0.0177552	0.0112873	0.0071655	0.000634115	0.0105897	0.0116677	0.0135701	0.00925808						0.114458	-0.277108	-0.248193	-0.384337	-0.33012	0.883374	-1.40958	-1.06493	-1.98498
1009	1027		2067.94	17	7.81-7.90	0.0786676	0.149043	0.201276	0.228774	0.247342		0.0698086	0.162084	0.204819	0.259887	0.250957	1009	1027	0.00885897	-0.0130404	-0.00354359	-0.0311127	-0.00361446	1009	1027	0.0101347	0.00885897	0.0092842	0.0097803	0.0164422	0.00956768	0.0107016	0.00815025	0.00878809	0.0218285						0.150602	-0.221687	-0.060241	-0.528916	-0.0614458	1.10093	-1.6258	-0.496814	-4.09845
1009	1032		2600.22	22	7.09-7.15	0.154929	0.253614	0.334721	0.373823	0.381709		0.152738	0.284995	0.328861	0.38023	0.376835	1009	1032	0.00219058	-0.0313801	0.0058598	-0.00640745	0.00487404	1009	1032	0.0136911	0.018839	0.0103505	0.0180175	0.00350493	0.0156079	0.0226725	0.0167579	0.00892662	0.0274918						0.0481928	-0.690361	0.128916	-0.140964	0.107229	0.182749	-1.84381	0.515287	-0.551932
1017	1036		2320.26	18	7.46-7.54	0.175703	0.288621	0.37008	0.442905	0.460509		0.165127	0.298862	0.351941	0.456158	0.471285	1017	1036	0.0105756	-0.010241	0.0181392	-0.013253	-0.0107764	1017	1036	0.0237617	0.0137885	0.00917001	0.023427	0.0105756	0.0119143	0.0145248	0.0108434	0.02249	0.0390897						0.190361	-0.184337	0.326506	-0.238554	-0.193976	0.689111	-0.885686	2.21239	-0.706848
1024	1031		894.448	6	5.34-5.39	0.0158635	0.0128514	0.0257028	0.0355422	0.163052		0.00702811	0.00863454	0.014257	0.0361446	0.167068	1024	1031	0.00883534	0.00421687	0.0114458	-0.00060241	-0.00401606	1024	1031	0.00903614	0.00502008	0.00502008	0.0110442	0.0118474	0.00481928	0.00261044	0.00180723	0.00702811	0.00983936						0.053012	0.0253012	0.0686747	-0.00361446	-0.0240964	1.49432	1.29083	3.71564	-0.0797053
1036	1045		1120.64	8	8.44-8.52	-0.00060241	0.00933735	0.0176205	0.0462349	0.216717		-0.000150602	0.00376506	0.014006	0.0448795	0.240361	1036	1045	-0.000451807	0.00557229	0.00361446	0.00135542	-0.0236446	1036	1045	0.000903614	0.0153614	0.00256024	0.0144578	0.00451807	0.00286145	0.00195783	0.00135542	0.00165663	0.0129518						-0.00361446	0.0445783	0.0289157	0.0108434	-0.189157	-0.260787	0.623251	2.16108	0.161324
1037	1049		1450.83	11	5.96-6.02	0.0363636	0.11391	0.221577	0.306134	0.379299		0.0277108	0.117525	0.220811	0.325082	0.377875	1037	1049	0.00865279	-0.00361446	0.000766703	-0.0189485	0.00142388	1037	1049	0.0041621	0.0138007	0.00843373	0.00481928	0.00547645	0.00317634	0.00525739	0.00799562	0.0121577	0.0243154						0.0951807	-0.039759	0.00843373	-0.208434	0.0156627	2.86249	-0.423914	0.114269	-2.50953
1037	1050		1597.89	12	7.91-7.99	0.0518072	0.15502	0.266767	0.346988	0.406024		0.0365462	0.159438	0.266365	0.359639	0.433534	1037	1050	0.015261	-0.00441767	0.000401606	-0.0126506	-0.02751	1037	1050	0.0168675	0.0170683	0.00853414	0.0062249	0.00763052	0.00411647	0.00712851	0.0116466	0.00542169	0.0207831						0.183133	-0.053012	0.00481928	-0.151807	-0.33012	1.52241	-0.413667	0.0481765	-2.65435
1038	1049		1349.78	10	5.75-5.82	0.0337349	0.111566	0.22988	0.318675	0.397108		0.0240964	0.116747	0.224458	0.334458	0.396506	1038	1049	0.00963855	-0.00518072	0.00542169	-0.0157831	0.00060241	1038	1049	0.00686747	0.0177108	0.0103614	0.00518072	0.000481928	0.00578313	0.00650602	0.0086747	0.00686747	0.02						0.0963855	-0.0518072	0.0542169	-0.157831	0.0060241	1.85946	-0.475581	0.694917	-3.17784
1038	1050		1496.85	11	7.86-7.93	0.0420591	0.125301	0.259474	0.342716	0.387404		0.035816	0.154655	0.264951	0.359584	0.415225	1038	1050	0.00624315	-0.0293538	-0.00547645	-0.0168675	-0.0278204	1038	1050	0.0190581	0.0121577	0.0202629	0.0217963	0.00120482	0.00952903	0.00744797	0.0112815	0.0104053	0.0196057						0.0686747	-0.322892	-0.060241	-0.185542	-0.306024	0.507494	-3.56594	-0.409003	-1.20961
1039	1049		1186.71	9	5.75-5.82	0.038822	0.112851	0.220616	0.315797	0.403614		0.0235609	0.117269	0.228514	0.331861	0.417537	1039	1049	0.015261	-0.00441767	-0.00789826	-0.0160643	-0.0139224	1039	1049	0.00749665	0.00977242	0.0159304	0.00749665	0.0109772	0.00508701	0.00722892	0.00977242	0.0186078	0.00736278						0.137349	-0.039759	-0.0710843	-0.144578	-0.125301	2.91765	-0.629476	-0.731993	-1.38697
1041	1054		1465.77	12	10.27-10.31	0.0298193	0.0299197	0.0437751	0.063755	0.12992		0.026506	0.0440763	0.0553213	0.0773092	0.140863	1041	1054	0.00331325	-0.0141566	-0.0115462	-0.0135542	-0.0109438	1041	1054	0.00783133	0.00983936	0.00973896	0.00662651	0.00140562	0.00793173	0.00391566	0.00833333	0.00813253	0.00983936						0.039759	-0.16988	-0.138554	-0.162651	-0.131325	0.51485	-2.31542	-1.56024	-2.23791
1050	1056		840.322	5	6.05-6.11	0.103614	0.221687	0.268916	0.323855	0.409398		0.0896386	0.240723	0.253253	0.354458	0.42506	1050	1056	0.0139759	-0.0190361	0.0156627	-0.0306024	-0.0156627	1050	1056	0.0137349	0.0272289	0.0106024	0.00891566	0.0113253	0.0106024	0.0226506	0.0144578	0.0175904	0.0171084						0.0698795	-0.0951807	0.0783133	-0.153012	-0.0783133	1.39513	-0.930916	1.51313	-2.68777
1057	1068		1170.62	10	9.23-9.28	0.00963855	0.0116867	0.0298795	0.119277	0.250361		0.00951807	0.0145783	0.0328916	0.133735	0.267229	1057	1068	0.000120482	-0.00289157	-0.00301205	-0.0144578	-0.0168675	1057	1068	0.000722892	0.00228916	0.00168675	0.00301205	0.00192771	0.000963855	0.00060241	0.00204819	0.00590361	0.0218072						0.00120482	-0.0289157	-0.0301205	-0.144578	-0.168675	0.173205	-2.11582	-1.96621	-3.7784
1066	1073		841.491	6	8.10-8.20	0.0849398	0.257229	0.434337	0.518474	0.580924		0.0672691	0.264659	0.456827	0.57008	0.616466	1066	1073	0.0176707	-0.00742972	-0.02249	-0.0516064	-0.0355422	1066	1073	0.0144578	0.0138554	0.00662651	0.000200803	0.00522088	0.00742972	0.00722892	0.0218876	0.0116466	0.0164659						0.106024	-0.0445783	-0.13494	-0.309639	-0.213253	1.88288	-0.823443	-1.70337	-7.67364
1069	1086		1955.16	13	7.21-7.29	0.251993	0.445783	0.584801	0.645783	0.668953		0.22975	0.482669	0.597498	0.703058	0.696756	1069	1086	0.0222428	-0.036886	-0.0126969	-0.0572753	-0.0278035	1069	1086	0.023911	0.0282669	0.0142725	0.0147359	0.00797034	0.0293791	0.0271548	0.0216867	0.0163114	0.0300278						0.289157	-0.479518	-0.16506	-0.744578	-0.361446	1.01706	-1.62993	-0.847079	-4.51295
1080	1097		2076.08	15	7.56-7.63	0.0671486	0.099759	0.128675	0.165703	0.231004		0.0491566	0.103695	0.134297	0.178554	0.23494	1080	1097	0.017992	-0.00393574	-0.00562249	-0.0128514	-0.00393574	1080	1097	0.00819277	0.00738956	0.00610442	0.0053012	0.0146185	0.0064257	0.00425703	0.0053012	0.00963855	0.0113253						0.26988	-0.0590361	-0.0843373	-0.192771	-0.0590361	2.99297	-0.79935	-1.20451	-2.02353
1087	1098		1361.66	10	6.65-6.72	0.11747	0.205422	0.271325	0.340602	0.353494		0.0920482	0.216024	0.28494	0.377108	0.380361	1087	1098	0.0254217	-0.0106024	-0.0136145	-0.036506	-0.0268675	1087	1098	0.0177108	0.0249398	0.0159036	0.0171084	0.0153012	0.00542169	0.0171084	0.0159036	0.0209639	0.0328916						0.254217	-0.106024	-0.136145	-0.36506	-0.268675	2.37725	-0.607195	-1.04846	-2.33677
1088	1097		1175.56	8	5.74-5.82	0.0941265	0.195934	0.305572	0.442922	0.457681		0.0929217	0.231476	0.314608	0.465964	0.476657	1088	1097	0.00120482	-0.0355422	-0.00903614	-0.0230422	-0.0189759	1088	1097	0.0123494	0.0207831	0.0176205	0.0159639	0.00993976	0.00753012	0.0189759	0.0207831	0.0186747	0.00813253						0.00963855	-0.284337	-0.0722892	-0.184337	-0.151807	0.144275	-2.18744	-0.574406	-1.62448
1088	1098		1274.63	9	6.55-6.62	0.0733601	0.145783	0.244177	0.352343	0.398795		0.0528782	0.160107	0.248059	0.388487	0.404284	1088	1098	0.0204819	-0.014324	-0.0038822	-0.0361446	-0.00548862	1088	1098	0.0160643	0.015261	0.00535475	0.0180723	0.00495315	0.0107095	0.011245	0.0178046	0.00977242	0.0271754						0.184337	-0.128916	-0.0349398	-0.325301	-0.0493976	1.83747	-1.30878	-0.361663	-3.04714
1097	1112		1742.79	14	8.73-8.77	0.0786575	0.147074	0.209725	0.24191	0.256454		0.0621343	0.149312	0.221084	0.263511	0.256971	1097	1112	0.0165232	-0.00223752	-0.0113597	-0.0216007	-0.000516351	1097	1112	0.0124785	0.0160929	0.00903614	0.0181583	0.0112737	0.00636833	0.0100688	0.00817556	0.0070568	0.0199656						0.231325	-0.0313253	-0.159036	-0.30241	-0.00722892	2.04282	-0.204154	-1.61465	-1.92047
1098	1112		1639.78	13	8.32-8.37	0.083874	0.164504	0.241335	0.271918	0.281186		0.0672845	0.157553	0.228823	0.279055	0.273216	1098	1112	0.0165894	0.00695088	0.0125116	-0.00713624	0.00797034	1098	1112	0.00750695	0.0222428	0.00750695	0.0068582	0.00565338	0.00676552	0.00991659	0.00889713	0.0107507	0.0192771						0.215663	0.0903614	0.162651	-0.0927711	0.103614	2.8433	0.49436	1.86158	-0.969289
1099	1112		1540.71	12	8.15-8.22	0.086747	0.16255	0.237952	0.266566	0.276406		0.0725904	0.169578	0.240361	0.286044	0.278112	1099	1112	0.0141566	-0.00702811	-0.00240964	-0.0194779	-0.00170683	1099	1112	0.0101406	0.0135542	0.0116466	0.00893574	0.00341365	0.0120482	0.0104418	0.00963855	0.00783133	0.0231928						0.16988	-0.0843373	-0.0289157	-0.233735	-0.0204819	1.55705	-0.711464	-0.276075	-2.83936
1102	1119		1871.89	16	6.62-6.68	0.00218373	0.00926205	0.0346386	0.194955	0.452937		0.010241	0.00625	0.0323042	0.183584	0.456325	1102	1119	-0.00805723	0.00301205	0.00233434	0.0113705	-0.00338855	1102	1119	0.00331325	0.00534639	0.00376506	0.00203313	0.0100151	0.00926205	0.000527108	0.000527108	0.00722892	0.0313253						-0.128916	0.0481928	0.0373494	0.181928	-0.0542169	-1.4187	0.971095	1.0635	2.62262
1112	1124		1349.7	11	5.71-5.81	0.0407448	0.106024	0.206243	0.289376	0.371303		0.028149	0.11391	0.215225	0.314677	0.361774	1112	1124	0.0125958	-0.00788609	-0.00898138	-0.0253012	0.00952903	1112	1124	0.0203724	0.0203724	0.016977	0.0135816	0.00974808	0.00799562	0.0127054	0.00613363	0.0094195	0.0325301						0.138554	-0.086747	-0.0987952	-0.278313	0.104819	0.996864	-0.568902	-0.86179	-2.65138
1113	1121		894.445	7	7.98-8.09	0.0118761	0.0118761	0.0363167	0.162651	0.244923		0.00929432	0.0148021	0.0404475	0.17074	0.250086	1113	1121	0.00258176	-0.00292599	-0.00413081	-0.0080895	-0.00516351	1113	1121	0.0010327	0.00309811	0.00327022	0.0020654	0.00258176	0.000860585	0.000860585	0.00240964	0.0020654	0.0166954						0.0180723	-0.0204819	-0.0289157	-0.0566265	-0.0361446	3.3265	-1.57615	-1.76134	-4.79692
1122	1143		2469.28	20	9.43-9.48	0.0613253	0.145542	0.231807	0.315904	0.353313		0.0557831	0.15512	0.23759	0.343795	0.363012	1122	1143	0.00554217	-0.00957831	-0.00578313	-0.0278916	-0.0096988	1122	1143	0.0086747	0.0108434	0.0110241	0.00620482	0.00186747	0.00415663	0.00584337	0.00807229	0.00975904	0.0274699						0.110843	-0.191566	-0.115663	-0.557831	-0.193976	0.997939	-1.34686	-0.733095	-4.17739
1132	1141		1197.65	8	7.22-7.28	0.0396084	0.086747	0.162651	0.295181	0.408735		0.039759	0.0957831	0.17997	0.327711	0.417771	1132	1141	-0.000150602	-0.00903614	-0.0173193	-0.0325301	-0.00903614	1132	1141	0.00240964	0.00768072	0.00587349	0.00572289	0.00496988	0.00195783	0.00466867	0.0191265	0.0106928	0.0240964						-0.00120482	-0.0722892	-0.138554	-0.260241	-0.0722892	-0.0840168	-1.74127	-1.49929	-4.64579
1132	1147		1815.99	14	6.74-6.82	0.0259036	0.0580034	0.0888124	0.105766	0.147504		0.0242685	0.0561962	0.0864888	0.114544	0.159552	1132	1147	0.00163511	0.00180723	0.00232358	-0.00877797	-0.0120482	1132	1147	0.00826162	0.0112737	0.00516351	0.0124785	0.0060241	0.00421687	0.00395869	0.00163511	0.0129088	0.0168675						0.0228916	0.0253012	0.0325301	-0.122892	-0.168675	0.305328	0.261975	0.743057	-0.846821
1133	1143		1296.72	9	7.95-8.03	0.0497992	0.164525	0.297992	0.380857	0.413922		0.0440428	0.181124	0.308568	0.414993	0.405622	1133	1143	0.00575636	-0.0165997	-0.0105756	-0.0341365	0.00829987	1133	1143	0.0064257	0.0128514	0.0119143	0.0108434	0.00348059	0.00575636	0.008166	0.00736278	0.0131191	0.0266399						0.0518072	-0.149398	-0.0951807	-0.307229	0.0746988	1.15571	-1.88828	-1.30786	-3.47387
1133	1148		1815.99	14	6.74-6.82	0.0259036	0.0580034	0.0888124	0.105766	0.147504		0.0242685	0.0561962	0.0864888	0.114544	0.159552	1133	1148	0.00163511	0.00180723	0.00232358	-0.00877797	-0.0120482	1133	1148	0.00826162	0.0112737	0.00516351	0.0124785	0.0060241	0.00421687	0.00395869	0.00163511	0.0129088	0.0168675						0.0228916	0.0253012	0.0325301	-0.122892	-0.168675	0.305328	0.261975	0.743057	-0.846821
1148	1155		970.433	6	9.31-9.39	0.0172691	0.0487952	0.145181	0.241165	0.338956		0.00843373	0.0504016	0.156627	0.269277	0.364458	1148	1155	0.00883534	-0.00160643	-0.0114458	-0.0281124	-0.025502	1148	1155	0.00200803	0.0128514	0.00361446	0.00261044	0.00481928	0.00542169	0.00120482	0.0062249	0.0064257	0.0216867						0.053012	-0.00963855	-0.0686747	-0.168675	-0.153012	2.64689	-0.215561	-2.75413	-7.02051
1156	1165		968.431	8	8.41-8.46	0.00436747	0.0209337	0.0590361	0.0643072	0.0759036		0.0114458	0.0368976	0.0625	0.0718373	0.0853916	1156	1165	-0.00707831	-0.0159639	-0.00346386	-0.00753012	-0.00948795	1156	1165	0.00451807	0.00798193	0.00572289	0.00451807	0.00286145	0.00225904	0.000903614	0.00406627	0.00135542	0.00572289						-0.0566265	-0.127711	-0.0277108	-0.060241	-0.0759036	-2.42707	-3.44211	-0.854592	-2.76501
1156	1167		1142.48	10	8.84-8.87	0.00759036	0.0244578	0.0550602	0.06	0.0759036		0.0046988	0.026747	0.0519277	0.0590361	0.0771084	1156	1167	0.00289157	-0.00228916	0.00313253	0.000963855	-0.00120482	1156	1167	0.000481928	0.00385542	0.000481928	0.00156627	0.00120482	0.00168675	0.00168675	0.000481928	0.00204819	0.00578313						0.0289157	-0.0228916	0.0313253	0.00963855	-0.0120482	2.85499	-0.942181	7.96084	0.647467
1161	1167		655.231	5	8.82-8.86	0.0313253	0.0390361	0.0648193	0.0836145	0.127952		0.019759	0.0106024	0.0884337	0.106265	0.111566	1161	1167	0.0115663	0.0284337	-0.0236145	-0.0226506	0.0163855	1161	1167	0.0195181	0.0139759	0.0204819	0.00963855	0.026988	0.0118072	0.013494	0.0209639	0.013494	0.00674699						0.0578313	0.142169	-0.118072	-0.113253	0.0819277	0.878212	2.53505	-1.39555	-2.36583
1168	1174		994.47	5	11.56-11.62	0.0060241	0.00192771	0.013012	0.019759	0.046506		0.00361446	0.0106024	0.0344578	0.0318072	0.0881928	1168	1174	0.00240964	-0.0086747	-0.0214458	-0.0120482	-0.0416867	1168	1174	0.02	0.0146988	0.00939759	0.0026506	0.00819277	0.0060241	0.00746988	0.000963855	0.00361446	0.0149398						0.0120482	-0.0433735	-0.107229	-0.060241	-0.208434	0.199814	-0.911271	-3.932	-4.65578
1168	1185		2167.02	14	9.20-9.28	0.00163511	0.0113597	0.0299484	0.0478485	0.0801205		0.00524957	0.00946644	0.030809	0.0577453	0.0925129	1168	1185	-0.00361446	0.00189329	-0.000860585	-0.00989673	-0.0123924	1168	1185	0.00309811	0.00154905	0.00421687	0.000258176	0.00421687	0.00154905	0.00387263	0.00430293	0.00378657	0.00765921						-0.0506024	0.026506	-0.0120482	-0.138554	-0.173494	-1.80739	0.786216	-0.247411	-4.51647
1170	1191		2647.42	18	7.06-7.14	0.0222222	0.0218876	0.0682062	0.126037	0.195515		0.00809906	0.0252343	0.0819277	0.131727	0.19498	1170	1191	0.0141232	-0.00334672	-0.0137216	-0.00568942	0.000535475	1170	1191	0.0205489	0.0123829	0.00883534	0.0236948	0.0321954	0.0114458	0.00669344	0.0133199	0.00568942	0.0218206						0.254217	-0.060241	-0.246988	-0.10241	0.00963855	1.03999	-0.41181	-1.4869	-0.404394
1171	1192		2647.42	18	7.04-7.14	0.00783133	0.0249665	0.0723561	0.130522	0.178648		0.00843373	0.0255689	0.0767738	0.132062	0.195315	1171	1192	-0.00060241	-0.00060241	-0.00441767	-0.00153949	-0.0166667	1171	1192	0.012249	0.011245	0.00910308	0.0232262	0.0151272	0.0114458	0.00669344	0.0227577	0.00568942	0.0218206						-0.0108434	-0.0108434	-0.0795181	-0.0277108	-0.3	-0.0622394	-0.0797324	-0.312174	-0.111508
1186	1198		1655.9	10	6.86-6.94	0.0674699	0.11494	0.215783	0.28988	0.383253		0.0662651	0.122048	0.230602	0.310602	0.383614	1186	1198	0.00120482	-0.00710843	-0.0148193	-0.0207229	-0.000361446	1186	1198	0.0156627	0.00337349	0.0120482	0.00698795	0.00433735	0.00373494	0.00975904	0.0131325	0.00421687	0.0214458						0.0120482	-0.0710843	-0.148193	-0.207229	-0.00361446	0.129601	-1.19239	-1.44023	-4.39775
1193	1199		929.439	5	9.13-9.20	0.151807	0.210843	0.334458	0.367952	0.433012		0.13759	0.23759	0.342169	0.396386	0.44747	1193	1199	0.0142169	-0.026747	-0.00771084	-0.0284337	-0.0144578	1193	1199	0.0231325	0.0103614	0.020241	0.0207229	0.00915663	0.0337349	0.013494	0.00891566	0.0187952	0.0209639						0.0710843	-0.133735	-0.0385542	-0.142169	-0.0722892	0.601999	-2.72302	-0.603845	-1.76034
1195	1211		1876.93	15	7.59-7.67	0.18988	0.243052	0.301928	0.34249	0.384177		0.198635	0.230683	0.310763	0.366988	0.40008	1195	1211	-0.00875502	0.0123695	-0.00883534	-0.024498	-0.0159036	1195	1211	0.0169478	0.0303614	0.0149398	0.00730924	0.00457831	0.00779116	0.00795181	0.00337349	0.00345382	0.0217671						-0.131325	0.185542	-0.13253	-0.36747	-0.238554	-0.812965	0.682627	-0.999175	-5.24875
1203	1209		730.325	5	4.10-4.12	0.0171084	0.0187952	0.0255422	0.0375904	0.118313		0.0122892	0.0187952	0.0224096	0.0450602	0.138795	1203	1209	0.00481928	0	0.00313253	-0.00746988	-0.0204819	1203	1209	0.0026506	0.00337349	0.00457831	0.00361446	0.00361446	0.00289157	0.0086747	0.00698795	0.00385542	0.0187952						0.0240964	0	0.0156627	-0.0373494	-0.10241	2.12798	0	0.649459	-2.44822
1213	1224		1525.7	10	9.97-10.04	0.00674699	0.0283133	0.0584337	0.106265	0.176747		0.00650602	0.0322892	0.0659036	0.126024	0.220964	1213	1224	0.000240964	-0.0039759	-0.00746988	-0.019759	-0.0442169	1213	1224	0.00156627	0.0060241	0.00337349	0.00361446	0.00927711	0.00204819	0.000963855	0.000722892	0.00361446	0.00963855						0.00240964	-0.039759	-0.0746988	-0.19759	-0.442169	0.161867	-1.1288	-3.75012	-6.69527
1213	1225		1711.78	11	11.48-11.54	0.00843373	0.0325301	0.0558598	0.100219	0.164513		0.00854326	0.0362541	0.0635268	0.120811	0.194962	1213	1225	-0.000109529	-0.00372399	-0.00766703	-0.0205915	-0.0304491	1213	1225	0.00317634	0.00722892	0.00164294	0.0033954	0.00153341	0.00175246	0.0026287	0.00186199	0.00613363	0.00854326						-0.00120482	-0.0409639	-0.0843373	-0.226506	-0.33494	-0.0522947	-0.838548	-5.34782	-5.08728
1213	1226		1782.81	12	11.28-11.32	0.00993976	0.027008	0.0596386	0.0963855	0.158735		0.00873494	0.0258032	0.0638554	0.112349	0.190763	1213	1226	0.00120482	0.00120482	-0.00421687	-0.0159639	-0.0320281	1213	1226	0.00170683	0.00853414	0.000301205	0.000702811	0.00251004	0.00341365	0.00401606	0.00491968	0.0061245	0.0144578						0.0144578	0.0144578	-0.0506024	-0.191566	-0.384337	0.546774	0.221251	-1.48184	-4.48525
1221	1227		879.46	5	8.63-8.71	0.0272289	0.0773494	0.0942169	0.13759	0.165542		0.00987952	0.0701205	0.0775904	0.125301	0.153253	1221	1227	0.0173494	0.00722892	0.0166265	0.0122892	0.0122892	1221	1227	0.00650602	0.0207229	0.00554217	0.00626506	0.00361446	0.00746988	0.0175904	0.00674699	0.00337349	0.0120482						0.086747	0.0361446	0.0831325	0.0614458	0.0614458	3.03354	0.460631	3.2982	2.99139
1224	1240		1815.92	11	6.74-6.83	0.0332968	0.0795181	0.113143	0.133625	0.191347		0.0309967	0.0780942	0.1069	0.13713	0.203724	1224	1240	0.00230011	0.00142388	0.00624315	-0.00350493	-0.0123768	1224	1240	0.0094195	0.0119387	0.00920044	0.00690033	0.00350493	0.00843373	0.00438116	0.00405257	0.0026287	0.011391						0.0253012	0.0156627	0.0686747	-0.0385542	-0.136145	0.315098	0.193929	1.0756	-0.822136
1225	1234		1043.49	6	8.13-8.23	0.155823	0.312851	0.45241	0.674699	0.698594		0.155823	0.30241	0.469679	0.695582	0.734137	1225	1234	0	0.0104418	-0.0172691	-0.0208835	-0.0355422	1225	1234	0.010241	0.0108434	0.00522088	0.0206827	0.0218876	0.010241	0.0146586	0.0212851	0.0184739	0.035743						0	0.0626506	-0.103614	-0.125301	-0.213253	0	0.991902	-1.36479	-1.30432
1225	1246		2359.16	16	9.36-9.41	0.0982681	0.179744	0.274172	0.372741	0.432078		0.104744	0.19887	0.295256	0.418223	0.449322	1225	1246	-0.0064759	-0.0191265	-0.0210843	-0.0454819	-0.017244	1225	1246	0.0115211	0.0142319	0.00873494	0.00700301	0.00256024	0.0159639	0.0107681	0.0111446	0.00941265	0.0305723						-0.103614	-0.306024	-0.337349	-0.727711	-0.275904	-0.569745	-1.85627	-2.57907	-6.7147
1235	1256		2301.12	16	9.02-9.16	0.0231175	0.0841114	0.15738	0.205798	0.25738		0.0525602	0.0945783	0.163931	0.229819	0.260166	1235	1256	-0.0294428	-0.0104669	-0.0065512	-0.0240211	-0.00278614	1235	1256	0.00338855	0.00745482	0.00625	0.0115964	0.00753012	0.014759	0.0060994	0.00737952	0.00933735	0.0229669						-0.471084	-0.16747	-0.104819	-0.384337	-0.0445783	-3.36765	-1.88216	-1.17336	-2.79452
1236	1256		2188.04	16	8.89-8.96	0.0176958	0.0764307	0.139684	0.188479	0.239834		0.0268072	0.101355	0.166265	0.233434	0.265889	1236	1256	-0.00911145	-0.0249247	-0.0265813	-0.0449548	-0.0260542	1236	1256	0.00150602	0.00963855	0.0159639	0.00376506	0.00685241	0.00263554	0.00685241	0.00760542	0.0112952	0.0248494						-0.145783	-0.398795	-0.425301	-0.719277	-0.416867	-5.19899	-3.65046	-2.60365	-6.53981
1247	1256		985.454	6	8.81-8.87	0.0578313	0.184137	0.278916	0.334337	0.342169		0.0465863	0.199398	0.283534	0.356627	0.341566	1247	1256	0.011245	-0.015261	-0.00461847	-0.0222892	0.00060241	1247	1256	0.00702811	0.0204819	0.0128514	0.014257	0.00722892	0.00522088	0.0164659	0.0180723	0.013253	0.0343373						0.0674699	-0.0915663	-0.0277108	-0.133735	0.00361446	2.22463	-1.00582	-0.360728	-1.9833
1257	1263		693.3	5	6.48-6.57	0.00409639	0.00650602	0.013012	0.0380723	0.175181		0.00481928	0.0106024	0.0166265	0.0385542	0.182169	1257	1263	-0.000722892	-0.00409639	-0.00361446	-0.000481928	-0.00698795	1257	1263	0.00481928	0.00240964	0.00240964	0.0086747	0.00216867	0.00506024	0.00626506	0.00337349	0.00409639	0.013253						-0.00361446	-0.0204819	-0.0180723	-0.00240964	-0.0349398	-0.179178	-1.05701	-1.5101	-0.0870114
1257	1267		1237.65	9	8.74-8.81	0.0274431	0.0242303	0.0552878	0.161044	0.248594		0.0176707	0.0157965	0.0603748	0.159572	0.254618	1257	1267	0.00977242	0.00843373	-0.00508701	0.00147256	-0.0060241	1257	1267	0.0190094	0.00281124	0.00548862	0.0135207	0.00990629	0.0157965	0.00562249	0.0174029	0.00535475	0.0270415						0.0879518	0.0759036	-0.0457831	0.013253	-0.0542169	0.68483	2.32379	-0.482847	0.175386
1273	1291		2034.95	16	8.56-8.61	0.130873	0.224021	0.295407	0.335392	0.389157		0.102937	0.236747	0.297666	0.366642	0.392922	1273	1291	0.0279367	-0.0127259	-0.00225904	-0.03125	-0.00376506	1273	1291	0.0173193	0.0240964	0.00903614	0.0142319	0.00338855	0.021762	0.00519578	0.00286145	0.0182229	0.0310241						0.446988	-0.203614	-0.0361446	-0.5	-0.060241	1.73978	-0.894188	-0.412809	-2.34092
1277	1290		1402.66	11	7.95-8.02	0.209639	0.340416	0.424315	0.556407	0.572946		0.184447	0.368565	0.466813	0.570427	0.567908	1277	1290	0.0251917	-0.028149	-0.0424973	-0.0140197	0.00503834	1277	1290	0.0249726	0.0205915	0.0201533	0.0249726	0.00317634	0.0247536	0.0202629	0.0222344	0.0140197	0.0257393						0.277108	-0.309639	-0.46747	-0.154217	0.0554217	1.24092	-1.68766	-2.45286	-0.847899
1281	1294		1530.77	11	6.19-6.25	0.0936473	0.140964	0.202957	0.28368	0.346112		0.0825849	0.156188	0.214348	0.313363	0.376451	1281	1294	0.0110624	-0.0152245	-0.011391	-0.0296824	-0.0303395	1281	1294	0.0120482	0.0115005	0.0109529	0.00832421	0.000985761	0.00481928	0.0123768	0.011391	0.0148959	0.00460022						0.121687	-0.16747	-0.125301	-0.326506	-0.333735	1.47659	-1.56078	-1.24852	-3.01285
1291	1300		1206.66	8	6.91-6.97	0.0697289	0.181476	0.268373	0.398042	0.584036		0.0578313	0.172892	0.262952	0.438404	0.60497	1291	1300	0.0118976	0.00858434	0.00542169	-0.0403614	-0.0209337	1291	1300	0.00888554	0.0120482	0.00587349	0.00903614	0.010994	0.0123494	0.0108434	0.0183735	0.0165663	0.0063253						0.0951807	0.0686747	0.0433735	-0.322892	-0.16747	1.35451	0.917289	0.486827	-3.70464
1335	1343		951.466	7	6.53-6.59	0.119793	0.326334	0.59105	0.709811	0.793115		0.114802	0.373666	0.631842	0.759725	0.827194	1335	1343	0.00499139	-0.0473322	-0.0407917	-0.0499139	-0.0340792	1335	1343	0.0127367	0.0213425	0.0108434	0.00447504	0.00464716	0.00740103	0.0163511	0.0149742	0.00981067	0.0232358						0.0349398	-0.331325	-0.285542	-0.349398	-0.238554	0.586887	-3.04923	-3.82159	-8.0175
1344	1368		2774.51	22	8.66-8.69	0.164732	0.242114	0.273658	0.285761	0.286911		0.141238	0.255586	0.28023	0.302519	0.288773	1344	1368	0.023494	-0.0134721	-0.00657174	-0.0167579	-0.00186199	1344	1368	0.016977	0.0190581	0.00673604	0.00536692	0.00153341	0.0123768	0.013034	0.0103505	0.010241	0.0159365						0.516867	-0.296386	-0.144578	-0.368675	-0.0409639	1.93687	-1.01063	-0.921714	-2.51042
1345	1356		1256.75	10	6.83-6.92	0.00951807	0.0114458	0.0139759	0.0162651	0.0425301		0.00542169	0.0109639	0.01	0.0178313	0.043012	1345	1356	0.00409639	0.000481928	0.0039759	-0.00156627	-0.000481928	1345	1356	0.00337349	0.0125301	0.00168675	0.00180723	0.00493976	0.00180723	0.00373494	0.00144578	0.00156627	0.00542169						0.0409639	0.00481928	0.039759	-0.0156627	-0.00481928	1.85393	0.0638415	3.09981	-1.13437
1345	1368		2627.44	21	7.90-7.96	0.17619	0.260815	0.294607	0.31027	0.315089		0.143029	0.266954	0.287608	0.318876	0.310843	1345	1368	0.0331612	-0.00613884	0.00699943	-0.00860585	0.00424555	1345	1368	0.0218015	0.0169822	0.00556512	0.00137694	0.00378657	0.0125072	0.0172117	0.0114171	0.00510614	0.0211704						0.696386	-0.128916	0.146988	-0.180723	0.0891566	2.2852	-0.439747	0.954505	-2.81851
1346	1364		2071.15	16	7.32-7.42	0.0281627	0.116717	0.225075	0.279367	0.291265		0.0222892	0.131551	0.220934	0.29759	0.298419	1346	1364	0.00587349	-0.0148343	0.00414157	-0.0182229	-0.00715361	1346	1364	0.0103163	0.00707831	0.00557229	0.00835843	0.00783133	0.00368976	0.00429217	0.00722892	0.0061747	0.0245482						0.0939759	-0.237349	0.0662651	-0.291566	-0.114458	0.928528	-3.10387	0.785928	-3.03728
1348	1368		2314.24	18	7.34-7.39	0.224431	0.310442	0.345181	0.363052	0.369746		0.178112	0.317135	0.346787	0.386948	0.375368	1348	1368	0.0463186	-0.00669344	-0.00160643	-0.0238956	-0.00562249	1348	1368	0.0317269	0.025502	0.0115127	0.00756359	0.00348059	0.0158635	0.0176707	0.0139224	0.008166	0.0253681						0.833735	-0.120482	-0.0289157	-0.43012	-0.101205	2.26169	-0.373668	-0.154015	-3.71841
1349	1356		872.508	6	6.03-6.10	0.0437751	0.122892	0.162851	0.181325	0.174297		0.0353414	0.124297	0.162851	0.185743	0.177108	1349	1356	0.00843373	-0.00140562	0	-0.00441767	-0.00281124	1349	1356	0.0104418	0.0140562	0.0226908	0.00662651	0.00823293	0.00923695	0.0214859	0.0184739	0.00843373	0.0246988						0.0506024	-0.00843373	0	-0.026506	-0.0168675	1.04782	-0.0948229	0	-0.713399
[truncated: 7 more columns]

## Sheet: VPS34_deuteration_table
				Date:			-		SD	0.0103697																														for STDEV	Threshold Value=		0.3
Global Color scale				Experiment date:			-			-0.00876552																															Threshold percent		0.05
0.1	0.35	0.7		Sample:			HSVPS34_FL											-0.1	-0.05	0.05	0.1																				t-threshold		2.776
				Instrument:			Waters Synapt G2 Si
																										STDEVS					STDEVS
		Max Frac Deut		0.83		a	ComplexII_rab5					b	ComplexII_solo						a-b differences							a	ComplexII_rab5				b	ComplexII_solo									Differences in Daltons (Differences >+/- 0.5Da Highlighted					t-test	*=assumes triplicate values, a p=0.05 test
Start	End	Mod	m/z	#D	RT	0.3	3	30	300	3000		0.3	3	30	300	3000	Start	End	0.3	3	30	300	3000	Start	End	0.3	3	30	300	3000	0.3	3	30	300	3000						0.005	0.05	0.5	5	50	0.005	0.05	0.5	5
15	21		813.46	5	10.21-10.26	0.0195181	0.145301	0.242892	0.373976	0.392289		0.0233735	0.148193	0.250843	0.398795	0.405301	15	21	-0.00385542	-0.00289157	-0.00795181	-0.0248193	-0.013012	15	21	0.00506024	0.0113253	0.0122892	0.00385542	0.00120482	0.000963855	0.00698795	0.00626506	0.00361446	0.0209639						-0.0192771	-0.0144578	-0.039759	-0.124096	-0.0650602	-1.29635	-0.37635	-0.998473	-8.1344
19	26		856.538	6	9.12-9.19	-0.00180723	0.00341365	0.00461847	0.0240964	0.0925703		-0.000803213	0.00160643	0.00562249	0.0230924	0.085743	19	26	-0.00100402	0.00180723	-0.00100402	0.00100402	0.00682731	19	26	0.00160643	0.00421687	0.000401606	0.00763052	0.013253	0.00301205	0.00180723	0.00843373	0.00481928	0.0106426						-0.0060241	0.0108434	-0.0060241	0.0060241	0.0409639	-0.509427	0.682288	-0.205963	0.192688
19	39		2373.37	19	7.26-7.32	0.0887127	0.184908	0.269689	0.354788	0.387191		0.0874445	0.209892	0.289981	0.396829	0.400951	19	39	0.00126823	-0.0249841	-0.0202917	-0.0420419	-0.0137603	19	39	0.0111604	0.0201649	0.0109068	0.0065948	0.0043754	0.0113507	0.0135701	0.012175	0.0102093	0.0315789						0.0240964	-0.474699	-0.385542	-0.798795	-0.261446	0.137994	-1.7804	-2.15015	-5.99132
20	39		2274.31	18	6.96-7.03	0.0986613	0.197122	0.285609	0.371419	0.41158		0.0894913	0.222892	0.306627	0.417202	0.427041	20	39	0.00917001	-0.0257697	-0.0210174	-0.0457831	-0.0154618	20	39	0.0138554	0.020415	0.00789826	0.0126506	0.0107764	0.00716198	0.0148594	0.0129853	0.0105756	0.0321285						0.16506	-0.463855	-0.378313	-0.824096	-0.278313	1.01833	-1.76769	-2.39516	-4.80924
21	38		2033.16	16	6.00-6.06	0.117244	0.234789	0.330648	0.427334	0.473268		0.104819	0.255648	0.346009	0.472741	0.501958	21	38	0.0124247	-0.0208584	-0.0153614	-0.0454066	-0.0286898	21	38	0.0185994	0.0191265	0.00963855	0.00926205	0.00120482	0.0153614	0.0181476	0.010994	0.0201807	0.00534639						0.198795	-0.333735	-0.245783	-0.726506	-0.459036	0.892109	-1.37025	-1.81979	-3.54189
21	39		2146.25	17	6.82-6.88	0.100354	0.211623	0.300992	0.390787	0.431821		0.0960312	0.234585	0.321474	0.439121	0.454926	21	39	0.00432318	-0.0229624	-0.0204819	-0.0483345	-0.0231042	21	39	0.0139617	0.0200567	0.00786676	0.00637845	0.00382707	0.00836286	0.0145996	0.0136782	0.0145996	0.0174344						0.073494	-0.390361	-0.348193	-0.821687	-0.392771	0.460097	-1.60322	-2.24827	-5.25466
22	39		2033.16	16	6.00-6.06	0.107907	0.226205	0.325904	0.421536	0.468223		0.101581	0.250151	0.343373	0.471235	0.492319	22	39	0.0063253	-0.0239458	-0.0174699	-0.0496988	-0.0240964	22	39	0.0143825	0.0209337	0.0121988	0.0110693	0.00512048	0.0148343	0.0182982	0.010241	0.01875	0.0173946						0.101205	-0.383133	-0.279518	-0.795181	-0.385542	0.530239	-1.49172	-1.89977	-3.95344
42	49		891.489	6	10.27-10.35	0.0126506	0.0297189	0.207028	0.591165	0.721687		0.0291165	0.0335341	0.280924	0.72751	0.801004	42	49	-0.0164659	-0.00381526	-0.0738956	-0.136345	-0.0793173	42	49	0.0128514	0.0120482	0.00903614	0.0138554	0.00983936	0.0198795	0.00542169	0.0138554	0.012249	0.0138554						-0.0987952	-0.0228916	-0.443373	-0.818072	-0.475904	-1.2048	-0.500173	-7.73752	-12.7697
50	57		957.375	6	8.03-8.09	0.194779	0.2751	0.361647	0.386546	0.391566		0.166466	0.297992	0.373896	0.426506	0.398394	50	57	0.0283133	-0.0228916	-0.012249	-0.0399598	-0.00682731	50	57	0.0232932	0.0212851	0.0124498	0.0062249	0.00341365	0.0144578	0.0202811	0.013253	0.0106426	0.0263052						0.16988	-0.137349	-0.073494	-0.239759	-0.0409639	1.78878	-1.3486	-1.16677	-5.61362
58	64		858.395	5	10.32-10.36	-0.00168675	-0.0101205	-0.00385542	-0.00457831	0.0359036		0.000481928	-0.000240964	0.00554217	0.0142169	0.0366265	58	64	-0.00216867	-0.00987952	-0.00939759	-0.0187952	-0.000722892	58	64	0.00361446	0.00891566	0.00578313	0.00506024	0.00987952	0.0106024	0.00891566	0.00554217	0.0103614	0.00240964						-0.0108434	-0.0493976	-0.046988	-0.0939759	-0.00361446	-0.335333	-1.35715	-2.0321	-2.82317
62	68		777.402	5	5.73-5.79	-0.000963855	-0.000240964	0.00361446	0.00554217	0.00216867		0.00337349	0.00554217	0.00337349	0.00674699	0.00192771	62	68	-0.00433735	-0.00578313	0.000240964	-0.00120482	0.000240964	62	68	0.0060241	0.00939759	0.00313253	0.00698795	0.00289157	0.00457831	0.00626506	0.00289157	0.00506024	0.00481928						-0.0216867	-0.0289157	0.00120482	-0.0060241	0.00120482	-0.992875	-0.886864	0.0979013	-0.241873
65	72		797.465	5	7.66-7.74	0.0127711	0.0339759	0.168193	0.408916	0.504096		0.00987952	0.0291566	0.168675	0.430361	0.51759	65	72	0.00289157	0.00481928	-0.000481928	-0.0214458	-0.013494	65	72	0.00361446	0.00361446	0.0142169	0.00939759	0.00192771	0.00168675	0.00240964	0.00506024	0.00795181	0.0272289						0.0144578	0.0240964	-0.00240964	-0.107229	-0.0674699	1.25564	1.92154	-0.0553142	-3.01738
73	87		1897.96	13	9.74-9.80	0.12734	0.215014	0.303614	0.355792	0.413438		0.112048	0.241149	0.316404	0.38582	0.433642	73	87	0.0152919	-0.0261353	-0.0127896	-0.0300278	-0.0202039	73	87	0.0141798	0.0193698	0.00917516	0.00574606	0.00315107	0.00732159	0.01038	0.0101019	0.00732159	0.0324374						0.198795	-0.339759	-0.166265	-0.390361	-0.262651	1.65971	-2.05989	-1.62327	-5.58815
73	90		2327.12	16	10.73-10.77	0.098494	0.186069	0.286596	0.346762	0.414608		0.0864458	0.208358	0.297741	0.38238	0.42741	73	90	0.0120482	-0.0222892	-0.0111446	-0.0356175	-0.0128012	73	90	0.0126506	0.0144578	0.00715361	0.00685241	0.00414157	0.00625	0.0103916	0.00918675	0.0143072	0.0293675						0.192771	-0.356627	-0.178313	-0.56988	-0.204819	1.47893	-2.16828	-1.65784	-3.88887
81	87		995.461	5	10.84-10.88	0.194217	0.33759	0.507952	0.540964	0.55253		0.18	0.384819	0.510602	0.571325	0.575663	81	87	0.0142169	-0.0472289	-0.0026506	-0.0303614	-0.0231325	81	87	0.0233735	0.0281928	0.0125301	0.0118072	0.00650602	0.0257831	0.0175904	0.0180723	0.0139759	0.00120482						0.0710843	-0.236145	-0.013253	-0.151807	-0.115663	0.707581	-2.4617	-0.208765	-2.8743
81	90		1424.63	8	11.91-11.97	0.130271	0.259488	0.438705	0.499247	0.537952		0.10738	0.296084	0.436446	0.536295	0.545633	81	90	0.0228916	-0.0365964	0.00225904	-0.0370482	-0.00768072	81	90	0.0176205	0.0189759	0.00662651	0.00798193	0.00963855	0.0150602	0.00828313	0.0201807	0.0149096	0.0362952						0.183133	-0.292771	0.0180723	-0.296386	-0.0614458	1.71053	-3.06143	0.18421	-3.79436
90	105		1937.09	11	8.92-8.97	0.018839	0.0663746	0.135049	0.215225	0.306243		0.00569551	0.0617744	0.128149	0.223111	0.317853	90	105	0.0131435	0.00460022	0.00690033	-0.00788609	-0.0116101	90	105	0.00405257	0.00536692	0.0124863	0.00668127	0.00974808	0.000985761	0.0060241	0.00317634	0.00273823	0.0174151						0.144578	0.0506024	0.0759036	-0.086747	-0.127711	5.45831	0.987575	0.927642	-1.89168
90	107		2107.19	13	9.14-9.18	0.0113994	0.0580167	0.117238	0.181557	0.267748		0.0205746	0.0710843	0.134198	0.211492	0.285079	90	107	-0.00917516	-0.0130677	-0.0169601	-0.0299351	-0.0173309	90	107	0.00278035	0.0100093	0.00463392	0.0116775	0.00741427	0.00574606	0.0105653	0.00518999	0.00305839	0.0253012						-0.119277	-0.16988	-0.220482	-0.389157	-0.225301	-2.48957	-1.55519	-4.22208	-4.29523
91	105		1751.01	10	7.66-7.72	0.016747	0.0510843	0.0808434	0.165904	0.282169		0.0149398	0.0546988	0.086988	0.185542	0.296988	91	105	0.00180723	-0.00361446	-0.00614458	-0.0196386	-0.0148193	91	105	0.00108434	0.00421687	0.00481928	0.00349398	0.00313253	0.00289157	0.00204819	0.00481928	0.00506024	0.0191566						0.0180723	-0.0361446	-0.0614458	-0.196386	-0.148193	1.01361	-1.33542	-1.56155	-5.53152
91	107		1921.11	12	7.99-8.06	0.010743	0.0398594	0.0667671	0.133835	0.229418		0.0128514	0.0457831	0.0722892	0.151004	0.239357	91	107	-0.00210843	-0.00592369	-0.00552209	-0.0171687	-0.00993976	91	107	0.00150602	0.00351406	0.00180723	0.00271084	0.00110442	0.00150602	0.00220884	0.000702811	0.00411647	0.015261						-0.0253012	-0.0710843	-0.0662651	-0.206024	-0.119277	-1.71464	-2.47196	-4.93252	-6.03321
91	108		2034.2	13	8.82-8.87	0.0144578	0.0447637	0.0781279	0.146617	0.241983		0.0177016	0.046988	0.0939759	0.184337	0.277757	91	108	-0.00324374	-0.00222428	-0.015848	-0.0377201	-0.0357739	91	108	0.00157553	0.0047266	0.0147359	0.0055607	0.0112141	0.00370714	0.00537535	0.0151993	0.0147359	0.00834106						-0.0421687	-0.0289157	-0.206024	-0.490361	-0.46506	-1.3948	-0.538228	-1.29663	-4.1481
94	105		1396.75	8	6.75-6.83	0.0153614	0.0480422	0.0920181	0.206024	0.335843		0.00301205	0.0451807	0.0849398	0.213554	0.348193	94	105	0.0123494	0.00286145	0.00707831	-0.00753012	-0.0123494	94	105	0.00722892	0.0121988	0.0061747	0.0100904	0.000903614	0.00436747	0.00150602	0.00316265	0.00225904	0.0292169						0.0987952	0.0228916	0.0566265	-0.060241	-0.0987952	2.53259	0.403222	1.7672	-1.26135
106	129		2399.31	20	11.70-11.74	0.0466867	0.100482	0.116145	0.135542	0.186205		0.0450602	0.111928	0.123434	0.159759	0.200301	106	129	0.00162651	-0.0114458	-0.00728916	-0.0242169	-0.0140964	106	129	0.00620482	0.00783133	0.0108434	0.0060241	0.0010241	0.00512048	0.00457831	0.00403614	0.00391566	0.00837349						0.0325301	-0.228916	-0.145783	-0.484337	-0.281928	0.350187	-2.1854	-1.09118	-5.83795
108	126		1930.02	15	10.67-10.77	0.0531727	0.104578	0.13261	0.156305	0.228514		0.0470683	0.112691	0.126506	0.182329	0.248755	108	126	0.00610442	-0.00811245	0.00610442	-0.0260241	-0.020241	108	126	0.00690763	0.0118876	0.0060241	0.00128514	0.00160643	0.00538153	0.0102008	0.00682731	0.00433735	0.0137349						0.0915663	-0.121687	0.0915663	-0.390361	-0.303614	1.20747	-0.897019	1.16124	-9.96412
108	129		2229.2	18	11.46-11.51	0.0668675	0.134538	0.158501	0.187149	0.244043		0.0587015	0.145917	0.164793	0.211111	0.260509	108	129	0.008166	-0.0113788	-0.00629183	-0.0239625	-0.0164659	108	129	0.00742972	0.0113119	0.00455154	0.004083	0.00187416	0.0064257	0.00997323	0.00635877	0.00381526	0.0175368						0.146988	-0.204819	-0.113253	-0.431325	-0.296386	1.43989	-1.30689	-1.3936	-7.42724
109	126		1816.94	14	9.69-9.75	0.0606713	0.124871	0.153356	0.186403	0.256885		0.0537866	0.134423	0.157745	0.21222	0.273064	109	126	0.00688468	-0.0095525	-0.00438898	-0.0258176	-0.016179	109	126	0.00697074	0.0111015	0.00292599	0.00421687	0.00524957	0.00567986	0.00817556	0.00542169	0.00481928	0.0164372						0.0963855	-0.133735	-0.0614458	-0.361446	-0.226506	1.32617	-1.20006	-1.23391	-6.98304
109	129		2116.12	17	10.78-10.82	0.0682495	0.140822	0.166478	0.195535	0.254855		0.0586818	0.149965	0.171013	0.220482	0.271722	109	129	0.00956768	-0.00914245	-0.00453579	-0.0249468	-0.0168675	109	129	0.00864635	0.0118356	0.00474841	0.00396882	0.00198441	0.00574061	0.00871722	0.00630758	0.00496102	0.0183558						0.162651	-0.155422	-0.0771084	-0.424096	-0.286747	1.59673	-1.07727	-0.995072	-6.80117
110	126		1715.89	13	9.16-9.22	0.0875811	0.146525	0.164133	0.205005	0.271733		0.060519	0.150602	0.177757	0.218072	0.281742	110	126	0.0270621	-0.00407785	-0.0136237	-0.0130677	-0.0100093	110	126	0.00908248	0.0104727	0.0118628	0.0094532	0.00778499	0.00658017	0.00861909	0.0109361	0.00732159	0.0151066						0.351807	-0.053012	-0.177108	-0.16988	-0.13012	4.17925	-0.520743	-1.46251	-1.89294
110	129		2015.07	16	10.43-10.53	0.0697289	0.147666	0.191114	0.194804	0.256175		0.0725904	0.166642	0.181627	0.230271	0.274172	110	129	-0.00286145	-0.0189759	0.00948795	-0.0354669	-0.017997	110	129	0.00775602	0.0104669	0.0131024	0.00391566	0.00248494	0.0171687	0.0136295	0.00775602	0.00301205	0.0112199						-0.0457831	-0.303614	0.151807	-0.56747	-0.287952	-0.263076	-1.91257	1.07932	-12.435
114	123		943.513	6	8.51-8.60	0.00120482	0.00742972	0.00502008	0.00542169	0.0158635		0.00160643	0.00361446	0.00542169	0.00502008	0.0100402	114	123	-0.000401606	0.00381526	-0.000401606	0.000401606	0.00582329	114	123	0.00100402	0.00261044	0.00301205	0.00441767	0.00120482	0.00301205	0.00120482	0.000803213	0.00220884	0.00200803						-0.00240964	0.0228916	-0.00240964	0.00240964	0.0349398	-0.219089	2.29846	-0.223142	0.140836
129	137		1117.57	7	12.29-12.32	0.013253	0.0337349	0.155422	0.278313	0.283477		0.0209983	0.0407917	0.173838	0.297074	0.308262	129	137	-0.00774527	-0.0070568	-0.0184165	-0.0187608	-0.0247849	129	137	0.00843373	0.0292599	0.019105	0.0149742	0.0144578	0.0120482	0.0154905	0.0182444	0.0158348	0.0153184						-0.0542169	-0.0493976	-0.128916	-0.131325	-0.173494	-0.912183	-0.369185	-1.20749	-1.49101
130	136		848.389	5	10.34-10.42	0.0756627	0.135181	0.174217	0.289398	0.443133		0.0616867	0.142651	0.176386	0.316145	0.452048	130	136	0.0139759	-0.00746988	-0.00216867	-0.026747	-0.00891566	130	136	0.00963855	0.0139759	0.00313253	0.00722892	0.00313253	0.00626506	0.00771084	0.0060241	0.013494	0.0349398						0.0698795	-0.0373494	-0.0108434	-0.133735	-0.0445783	2.10573	-0.810567	-0.553214	-3.02627
136	150		1854.92	12	8.54-8.58	0.0144578	0.0358434	0.0563253	0.0742972	0.142269		0.00963855	0.0379518	0.0540161	0.0791165	0.139859	136	150	0.00481928	-0.00210843	0.00230924	-0.00481928	0.00240964	136	150	0.00662651	0.0110442	0.00702811	0.00963855	0.00421687	0.0123494	0.00913655	0.0162651	0.00702811	0.00502008						0.0578313	-0.0253012	0.0277108	-0.0578313	0.0289157	0.595596	-0.254781	0.225736	-0.699755
143	167		2669.37	20	7.96-8.01	0.114277	0.165783	0.174398	0.229699	0.309217		0.0928916	0.140663	0.16512	0.241747	0.304639	143	167	0.0213855	0.0251205	0.00927711	-0.0120482	0.00457831	143	167	0.00487952	0.00927711	0.00668675	0.0180723	0.0127108	0.0174699	0.00337349	0.00873494	0.0154217	0.0269277						0.427711	0.50241	0.185542	-0.240964	0.0915663	2.04211	4.40766	1.46069	-0.878365
144	167		2556.28	19	7.17-7.24	0.108561	0.158339	0.191249	0.250539	0.357387		0.108434	0.173874	0.213126	0.288142	0.366265	144	167	0.000126823	-0.0155358	-0.021877	-0.037603	-0.00887762	144	167	0.0164236	0.0183893	0.0065948	0.00906785	0.0192137	0.00944832	0.0144578	0.00469245	0.0124921	0.0275206						0.00240964	-0.295181	-0.415663	-0.714458	-0.168675	0.0115933	-1.15033	-4.68158	-4.21931
145	153		985.451	6	8.79-8.83	0.0634538	0.192169	0.288153	0.350803	0.362249		0.0524096	0.211044	0.303414	0.373494	0.357229	145	153	0.0110442	-0.0188755	-0.015261	-0.0226908	0.00502008	145	153	0.014257	0.0166667	0.0214859	0.0232932	0.0130522	0.00682731	0.0188755	0.0162651	0.0136546	0.0329317						0.0662651	-0.113253	-0.0915663	-0.136145	0.0301205	1.21013	-1.29835	-0.980883	-1.45559
150	167		1832.88	14	5.50-5.55	0.193804	0.259811	0.313511	0.380034	0.472633		0.165318	0.272375	0.315146	0.431067	0.483735	150	167	0.0284854	-0.0125645	-0.00163511	-0.0510327	-0.0111015	150	167	0.022031	0.023494	0.0185886	0.00989673	0.0141997	0.0207401	0.0222031	0.0174699	0.0145439	0.0438898						0.398795	-0.175904	-0.0228916	-0.714458	-0.155422	1.63061	-0.673226	-0.111021	-5.02458
151	167		1703.83	13	5.43-5.50	0.194439	0.267563	0.32493	0.401854	0.485728		0.16126	0.284708	0.325394	0.443744	0.512141	151	167	0.0331789	-0.0171455	-0.000463392	-0.0418906	-0.0264133	151	167	0.0253012	0.0244671	0.0139018	0.0113068	0.00769231	0.013253	0.0256719	0.0189991	0.0139944	0.046988						0.431325	-0.222892	-0.0060241	-0.544578	-0.343373	2.01202	-0.837384	-0.0340931	-4.03288
152	167		1632.8	12	5.48-5.54	0.205321	0.288554	0.336546	0.415562	0.501406		0.171586	0.311747	0.341566	0.455723	0.520281	152	167	0.0337349	-0.0231928	-0.00502008	-0.0401606	-0.0188755	152	167	0.0257028	0.0311245	0.0179719	0.022992	0.0108434	0.0110442	0.026004	0.0242972	0.0217871	0.0154618						0.404819	-0.278313	-0.060241	-0.481928	-0.226506	2.08866	-0.990462	-0.28771	-2.19606
159	169		1134.55	9	5.90-6.00	0.0267738	0.21178	0.570147	0.675234	0.680589		0.0342704	0.282865	0.610442	0.713922	0.709639	159	169	-0.00749665	-0.0710843	-0.0402945	-0.0386881	-0.0290495	159	169	0.00401606	0.0141901	0.0125837	0.0125837	0.0038822	0.00615797	0.0123159	0.0269076	0.0123159	0.0148594						-0.0674699	-0.639759	-0.362651	-0.348193	-0.261446	-1.76617	-6.55273	-2.34953	-3.80571
176	187		1376.75	10	3.79-3.85	0.0190361	0.0987952	0.232892	0.358795	0.374578		0.0248193	0.135301	0.276386	0.393373	0.400723	176	187	-0.00578313	-0.036506	-0.043494	-0.0345783	-0.0261446	176	187	0.00240964	0.00795181	0.0136145	0.0109639	0.00879518	0.00373494	0.0122892	0.01	0.013494	0.0128916						-0.0578313	-0.36506	-0.43494	-0.345783	-0.261446	-2.25358	-4.31976	-4.45962	-3.44469
176	192		2004.08	15	6.08-6.15	0.0293976	0.12498	0.248112	0.337751	0.347631		0.0314859	0.149478	0.264096	0.363133	0.344819	176	192	-0.00208835	-0.024498	-0.0159839	-0.0253815	0.00281124	176	192	0.00369478	0.0139759	0.0147791	0.00907631	0.00457831	0.00666667	0.00931727	0.00923695	0.0153414	0.0293976						-0.0313253	-0.36747	-0.239759	-0.380723	0.0421687	-0.474561	-2.52616	-1.58851	-2.46629
176	193		2117.17	16	7.36-7.45	0.0222139	0.108208	0.224699	0.318373	0.332229		0.0233434	0.131551	0.247967	0.34616	0.342771	176	193	-0.00112952	-0.0233434	-0.0232681	-0.0277861	-0.0105422	176	193	0.00278614	0.0127259	0.00692771	0.00587349	0.00444277	0.00406627	0.00730422	0.00918675	0.00903614	0.0064006						-0.0180723	-0.373494	-0.372289	-0.444578	-0.168675	-0.396896	-2.75551	-3.50263	-4.4656
176	196		2501.38	19	8.20-8.30	0.0101458	0.074889	0.155231	0.214585	0.262397		0.0147115	0.0920101	0.171909	0.248827	0.296195	176	196	-0.00456563	-0.0171211	-0.0166772	-0.0342422	-0.0337984	176	196	0.00291693	0.0043754	0.00348763	0.00570704	0.00621433	0.00348763	0.00380469	0.00596068	0.0114141	0.00469245						-0.086747	-0.325301	-0.316867	-0.650602	-0.642169	-1.73928	-5.11441	-4.18269	-4.64758
176	200		3034.64	23	8.65-8.74	-0.00130959	0.0398114	0.1033	0.209848	0.330278		0.0129387	0.0760608	0.162284	0.281823	0.388318	176	200	-0.0142483	-0.0362493	-0.0589838	-0.0719749	-0.0580409	176	200	0.0121006	0.00686223	0.00770037	0.013934	0.00319539	0.00115244	0.0053955	0.00691461	0.0124149	0.0111577						-0.327711	-0.833735	-1.35663	-1.65542	-1.33494	-2.03028	-7.19248	-9.8715	-6.67996
178	193		1918.04	14	7.34-7.44	0.0236661	0.110757	0.232616	0.298881	0.319363		0.0351979	0.143115	0.24389	0.328399	0.322461	178	193	-0.0115318	-0.032358	-0.0112737	-0.0295181	-0.00309811	178	193	0.00481928	0.00774527	0.0186747	0.00963855	0.00851979	0.00447504	0.0154045	0.0095525	0.00576592	0.0189329						-0.161446	-0.453012	-0.157831	-0.413253	-0.0433735	-3.0371	-3.25053	-0.930898	-4.55207
188	198		1390.76	9	11.41-11.46	0.0204819	0.0651941	0.120348	0.233601	0.465328		0.0263722	0.0943775	0.164123	0.324364	0.554485	188	198	-0.00589023	-0.0291834	-0.0437751	-0.0907631	-0.0891566	188	198	0.00174029	0.00776439	0.00133869	0.00307898	0.0021419	0.00669344	0.0133869	0.0060241	0.0164659	0.0148594						-0.053012	-0.262651	-0.393976	-0.816867	-0.80241	-1.47516	-3.26625	-12.2865	-9.38474
194	200		935.482	5	6.90-7.01	0.0106024	-0.0053012	0.0506024	0.271807	0.604578		-0.0115663	0.00313253	0.123614	0.413012	0.758072	194	200	0.0221687	-0.00843373	-0.073012	-0.141205	-0.153494	194	200	0.013494	0.00578313	0.00361446	0.013253	0.0026506	0.0228916	0.00963855	0.0228916	0.0175904	0.0281928						0.110843	-0.0421687	-0.36506	-0.706024	-0.76747	1.44499	-1.29957	-5.45673	-11.1048
203	214		1440.67	10	6.09-6.19	0.162289	0.404337	0.527952	0.576265	0.567349		0.214578	0.474458	0.519518	0.589639	0.555542	203	214	-0.0522892	-0.0701205	0.00843373	-0.0133735	0.0118072	203	214	0.0116867	0.0198795	0.0256627	0.0238554	0.00831325	0.0106024	0.0209639	0.0272289	0.0171084	0.043012						-0.522892	-0.701205	0.0843373	-0.133735	0.118072	-5.73958	-4.20384	0.390408	-0.789055
221	232		1461.64	10	6.21-6.28	0.0263855	0.0904819	0.199639	0.33988	0.431325		0.0196386	0.0990361	0.220723	0.379398	0.450482	221	232	0.00674699	-0.00855422	-0.0210843	-0.0395181	-0.0191566	221	232	0.00759036	0.00698795	0.0140964	0.0101205	0.00542169	0.00409639	0.00204819	0.00192771	0.00771084	0.0174699						0.0674699	-0.0855422	-0.210843	-0.395181	-0.191566	1.35488	-2.03467	-2.56678	-5.3797
222	232		1314.57	9	4.94-4.98	0.0108434	0.0641232	0.177108	0.336145	0.487416		0.0196787	0.0978581	0.224766	0.387015	0.473896	222	232	-0.00883534	-0.0337349	-0.0476573	-0.0508701	0.0135207	222	232	0.0172691	0.0153949	0.0145917	0.0145917	0.00896921	0.00495315	0.00669344	0.00522088	0.0109772	0.0182062						-0.0795181	-0.303614	-0.428916	-0.457831	0.121687	-0.85182	-3.48069	-5.3263	-4.82536
236	247		1351.61	9	8.01-8.10	0.192771	0.330924	0.377644	0.390897	0.395582		0.163588	0.34498	0.374565	0.422356	0.402677	236	247	0.0291834	-0.0140562	0.00307898	-0.0314592	-0.00709505	236	247	0.0307898	0.0356091	0.0159304	0.0103079	0.00776439	0.0195448	0.0159304	0.00937082	0.013253	0.0309237						0.262651	-0.126506	0.0277108	-0.283133	-0.0638554	1.38602	-0.624098	0.288546	-3.24537
252	260		1025.56	5	7.86-7.89	0.0380723	0.0773494	0.183373	0.305783	0.453012		0.0291566	0.0809639	0.17253	0.328193	0.455663	252	260	0.00891566	-0.00361446	0.0108434	-0.0224096	-0.0026506	252	260	0.00626506	0.00843373	0.0060241	0.0168675	0.00554217	0.00289157	0.0115663	0.0125301	0.013253	0.0325301						0.0445783	-0.0180723	0.0542169	-0.112048	-0.013253	2.23798	-0.437347	1.35088	-1.80944
266	290		2778.46	21	4.77-4.81	0.127711	0.244349	0.301721	0.348996	0.36529		0.0998279	0.246357	0.286116	0.347562	0.355995	266	290	0.027883	-0.00200803	0.0156053	0.00143431	0.00929432	266	290	0.0183592	0.0263913	0.0205393	0.00946644	0.00671256	0.0125072	0.0185886	0.0070568	0.0263913	0.0358003						0.585542	-0.0421687	0.327711	0.0301205	0.195181	2.17401	-0.107743	1.24456	0.0886055
297	309		1472.82	9	8.11-8.19	0.0792503	0.217269	0.307229	0.403079	0.550602		0.0702811	0.229317	0.317135	0.431459	0.56158	297	309	0.00896921	-0.0120482	-0.00990629	-0.0283802	-0.0109772	297	309	0.0103079	0.0168675	0.0038822	0.00722892	0.00254351	0.00629183	0.0145917	0.0120482	0.00736278	0.0398929						0.0807229	-0.108434	-0.0891566	-0.255422	-0.0987952	1.2864	-0.935657	-1.3555	-4.76394
297	310		1635.89	10	8.92-8.98	0.135301	0.283012	0.366747	0.452651	0.567229		0.111084	0.293735	0.380843	0.488072	0.597108	297	310	0.0242169	-0.0107229	-0.0140964	-0.0354217	-0.0298795	297	310	0.0154217	0.0142169	0.00759036	0.00277108	0.00891566	0.0177108	0.0131325	0.0209639	0.00650602	0.0385542						0.242169	-0.107229	-0.140964	-0.354217	-0.298795	1.7861	-0.959619	-1.09509	-8.67588
297	311		1764.93	11	8.75-8.80	0.114458	0.28609	0.386528	0.460679	0.574918		0.0998905	0.303943	0.402081	0.503724	0.590361	297	311	0.0145674	-0.0178532	-0.0155531	-0.0430449	-0.0154436	297	311	0.0131435	0.0163198	0.011172	0.00350493	0.00186199	0.0108434	0.0189485	0.0187295	0.0094195	0.0447974						0.160241	-0.196386	-0.171084	-0.473494	-0.16988	1.4808	-1.23653	-1.23525	-7.41818
297	314		2137.06	14	8.57-8.66	0.089759	0.233391	0.316351	0.376592	0.489587		0.0875215	0.24716	0.325387	0.408606	0.503528	297	314	0.00223752	-0.0137694	-0.00903614	-0.0320138	-0.0139415	297	314	0.00946644	0.0174699	0.00757315	0.0100688	0.00611015	0.0045611	0.0139415	0.0137694	0.00593804	0.0337349						0.0313253	-0.192771	-0.126506	-0.448193	-0.195181	0.368816	-1.06704	-0.995958	-4.74357
315	326		1629.87	10	10.16-10.21	0.000963855	0.0275904	0.10012	0.163373	0.233976		0.0104819	0.0361446	0.108795	0.173976	0.239398	315	326	-0.00951807	-0.00855422	-0.0086747	-0.0106024	-0.00542169	315	326	0.00554217	0.00156627	0.00457831	0.00192771	0.00819277	0.00698795	0.00759036	0.000843373	0.00638554	0.00939759						-0.0951807	-0.0855422	-0.086747	-0.106024	-0.0542169	-1.84841	-1.91172	-3.22748	-2.75314
315	333		2447.34	17	10.24-10.32	0.0279235	0.0852587	0.145996	0.263147	0.4146		0.0253721	0.0900071	0.164848	0.287172	0.431751	315	333	0.00255138	-0.00474841	-0.0188519	-0.0240255	-0.017151	315	333	0.00892984	0.00524451	0.00460666	0.00212615	0.00439405	0.00361446	0.00779589	0.0109851	0.00722892	0.0318214						0.0433735	-0.0807229	-0.320482	-0.408434	-0.291566	0.45872	-0.875337	-2.74115	-5.52261
320	326		956.472	5	6.90-6.97	0.0144578	0.0831325	0.251566	0.360723	0.403133		0.0419277	0.0877108	0.254699	0.422651	0.457349	320	326	-0.0274699	-0.00457831	-0.00313253	-0.0619277	-0.0542169	320	326	0.00385542	0.00915663	0.0142169	0.00915663	0.00554217	0.00313253	0.0180723	0.00771084	0.0060241	0.00698795						-0.137349	-0.0228916	-0.0156627	-0.309639	-0.271084	-9.57792	-0.391413	-0.335472	-9.78619
320	333		1773.94	12	8.42-8.49	0.0225904	0.098494	0.161948	0.297992	0.497691		0.0281124	0.113052	0.181426	0.346486	0.521185	320	333	-0.00552209	-0.0145582	-0.0194779	-0.048494	-0.023494	320	333	0.00401606	0.00582329	0.00672691	0.013755	0.0176707	0.00542169	0.00381526	0.00722892	0.0178715	0.0217871						-0.0662651	-0.174699	-0.233735	-0.581928	-0.281928	-1.41758	-3.62198	-3.4165	-3.72447
322	333		1454.78	10	8.36-8.43	0.0557831	0.15012	0.213133	0.358675	0.585301		0.049759	0.160602	0.225542	0.393494	0.619277	322	333	0.0060241	-0.0104819	-0.0124096	-0.0348193	-0.0339759	322	333	0.0046988	0.0107229	0.00301205	0.00771084	0.0112048	0.00746988	0.00831325	0.0086747	0.000361446	0.013012						0.060241	-0.104819	-0.124096	-0.348193	-0.339759	1.18235	-1.33809	-2.34071	-7.81271
327	333		835.48	5	6.38-6.46	0.0026506	0.0785542	0.0715663	0.263855	0.568916		0.0209639	0.0592771	0.0990361	0.279036	0.606988	327	333	-0.0183133	0.0192771	-0.0274699	-0.0151807	-0.0380723	327	333	0.00457831	0.0108434	0.00337349	0.00361446	0.00457831	0.00915663	0.0122892	0.00915663	0.00578313	0.00626506						-0.0915663	0.0963855	-0.137349	-0.0759036	-0.190361	-3.09839	2.03727	-4.87577	-3.85554
334	347		1670.85	11	8.64-8.70	0.045126	0.0910186	0.187404	0.343812	0.517196		0.0409639	0.101424	0.205805	0.380504	0.557722	334	347	0.0041621	-0.0104053	-0.0184009	-0.0366922	-0.0405257	334	347	0.00536692	0.011391	0.00591457	0.0140197	0.00284775	0.00394304	0.00668127	0.00744797	0.0101862	0.00558598						0.0457831	-0.114458	-0.20241	-0.403614	-0.445783	1.08248	-1.36473	-3.35108	-3.66732
334	349		1854.97	13	9.73-9.79	0.0410565	0.0780352	0.153475	0.278128	0.439018		0.0341983	0.0823911	0.159129	0.303058	0.460612	334	349	0.0068582	-0.00435589	-0.00565338	-0.0249305	-0.0215941	334	349	0.00676552	0.00398517	0.00769231	0.00741427	0.00287303	0.00518999	0.00139018	0.00759963	0.0055607	0.021316						0.0891566	-0.0566265	-0.073494	-0.324096	-0.280723	1.39309	-1.78753	-0.905552	-4.65922
334	350		1984.01	14	9.97-10.02	0.0170396	0.0586919	0.121429	0.284682	0.487263		0.0370912	0.0758176	0.148107	0.309208	0.470654	334	350	-0.0200516	-0.0171256	-0.0266781	-0.0245267	0.0166093	334	350	0.0126506	0.0136833	0.0153184	0.0166954	0.0216867	0.00611015	0.00860585	0.014716	0.0107573	0.0267642						-0.280723	-0.239759	-0.373494	-0.343373	0.23253	-2.47211	-1.83503	-2.17533	-2.13895
337	347		1326.66	8	8.65-8.71	0.0777108	0.134639	0.254669	0.396235	0.561446		0.0573795	0.133584	0.250452	0.420482	0.577861	337	347	0.0203313	0.00105422	0.00421687	-0.024247	-0.0164157	337	347	0.014006	0.0103916	0.00798193	0.00557229	0.00346386	0.00557229	0.0204819	0.0061747	0.0159639	0.034488						0.162651	0.00843373	0.0337349	-0.193976	-0.131325	2.33617	0.0795027	0.723762	-2.48379
337	351		1752.9	12	11.41-11.46	0.0297189	0.0636546	0.143775	0.268775	0.456627		0.0227912	0.0712851	0.146386	0.296185	0.469679	337	351	0.00692771	-0.00763052	-0.00261044	-0.0274096	-0.0130522	337	351	0.00471888	0.00491968	0.00210843	0.00271084	0.00803213	0.00291165	0.00401606	0.00502008	0.00271084	0.0119478						0.0831325	-0.0915663	-0.0313253	-0.328916	-0.156627	2.16401	-2.08109	-0.830398	-12.3835
345	351		771.449	5	7.93-8.03	-0.00337349	0.0146988	0.0756627	0.248193	0.418795		0.00457831	0.0245783	0.093012	0.296145	0.43759	345	351	-0.00795181	-0.00987952	-0.0173494	-0.0479518	-0.0187952	345	351	0.00506024	0.00650602	0.0228916	0.0156627	0.0151807	0.0103614	0.00626506	0.0125301	0.026747	0.0301205						-0.039759	-0.0493976	-0.086747	-0.239759	-0.0939759	-1.19442	-1.89455	-1.1515	-2.67958
346	359		1655.91	11	6.83-6.93	0.0486309	0.0958379	0.193538	0.257065	0.344359		0.0599124	0.115663	0.214677	0.284118	0.36287	346	359	-0.0112815	-0.0198248	-0.0211391	-0.0270537	-0.0185104	346	359	0.0094195	0.00438116	0.0107338	0.00624315	0.0109529	0.0060241	0.0127054	0.00733844	0.00492881	0.00361446						-0.124096	-0.218072	-0.23253	-0.29759	-0.203614	-1.7476	-2.55496	-2.81589	-5.89098
350	363		1645.8	11	9.71-9.78	0.0324206	0.103067	0.294085	0.379628	0.38609		0.0315444	0.124535	0.311829	0.393866	0.396386	350	363	0.000876232	-0.0214677	-0.0177437	-0.0142388	-0.0102957	350	363	0.00470975	0.00569551	0.00909091	0.0110624	0.00142388	0.00460022	0.00470975	0.0138007	0.00821468	0.0234392						0.00963855	-0.236145	-0.195181	-0.156627	-0.113253	0.230524	-5.03116	-1.8597	-1.78986
352	359		973.505	5	7.17-7.25	0.0207229	0.033253	0.125542	0.279277	0.505783		0.0180723	0.0308434	0.119277	0.306265	0.518072	352	359	0.0026506	0.00240964	0.00626506	-0.026988	-0.0122892	352	359	0.0103614	0.00578313	0.00843373	0.0159036	0.0101205	0.00409639	0.00554217	0.0053012	0.013494	0.00698795						0.013253	0.0120482	0.0313253	-0.13494	-0.0614458	0.41205	0.52105	1.08934	-2.2412
352	364		1516.76	10	9.58-9.64	0.0240964	0.083253	0.165301	0.264096	0.413735		0.0226506	0.0931325	0.18241	0.288916	0.408072	352	364	0.00144578	-0.00987952	-0.0171084	-0.0248193	0.00566265	352	364	0.0116867	0.00566265	0.00542169	0.00240964	0.0157831	0.00710843	0.0198795	0.00313253	0.00433735	0.0240964						0.0144578	-0.0987952	-0.171084	-0.248193	0.0566265	0.183069	-0.827847	-4.73246	-8.66393
352	366		1758.89	12	10.50-10.57	0.0293173	0.0916667	0.163153	0.225803	0.345884		0.0257028	0.0906627	0.156827	0.247289	0.343675	352	366	0.00361446	0.00100402	0.0063253	-0.0214859	0.00220884	352	366	0.0128514	0.0171687	0.00993976	0.00722892	0.0119478	0.0103414	0.00993976	0.0064257	0.0232932	0.0274096						0.0433735	0.0120482	0.0759036	-0.257831	0.026506	0.379523	0.0876586	0.925637	-1.52587
353	359		860.421	4	7.17-7.26	0.00481928	0.0111446	0.0581325	0.208434	0.636747		0.00753012	0.0165663	0.0954819	0.262349	0.73012	353	359	-0.00271084	-0.00542169	-0.0373494	-0.0539157	-0.0933735	353	359	0.00512048	0.00813253	0.00391566	0.00783133	0.0256024	0.00180723	0.0063253	0.00783133	0.00963855	0.0204819						-0.0108434	-0.0216867	-0.149398	-0.215663	-0.373494	-0.864692	-0.911465	-7.38846	-7.5195
353	367		1758.89	12	10.50-10.64	0.0294177	0.0917671	0.163253	0.225904	0.344378		0.0284137	0.0926707	0.159639	0.24488	0.348394	353	367	0.00100402	-0.000903614	0.00361446	-0.0189759	-0.00401606	353	367	0.0128514	0.0171687	0.00993976	0.00722892	0.00933735	0.00993976	0.0110442	0.00672691	0.0138554	0.0176707						0.0120482	-0.0108434	0.0433735	-0.227711	-0.0481928	0.107037	-0.0766677	0.521611	-2.10312
365	382		2076.08	15	7.56-7.63	0.0639357	0.0982329	0.131165	0.164257	0.228594		0.0499598	0.103293	0.132851	0.177831	0.232289	365	382	0.0139759	-0.00506024	-0.00168675	-0.0135743	-0.00369478	365	382	0.00682731	0.00987952	0.0107631	0.00449799	0.0145382	0.00811245	0.00329317	0.00779116	0.00971888	0.0102008						0.209639	-0.0759036	-0.0253012	-0.203614	-0.0554217	2.28303	-0.841622	-0.219878	-2.19542
365	384		2345.26	17	7.94-8.01	0.0428065	0.0671864	0.0912119	0.114741	0.166761		0.0350106	0.0703756	0.092842	0.123388	0.16747	365	384	0.00779589	-0.00318923	-0.00163005	-0.00864635	-0.000708717	365	384	0.00552799	0.00729979	0.00524451	0.00233877	0.0065202	0.00595322	0.00389794	0.00255138	0.00517364	0.0118356						0.13253	-0.0542169	-0.0277108	-0.146988	-0.0120482	1.66209	-0.667516	-0.484094	-2.63767
366	382		1947.03	14	7.04-7.08	0.0753873	0.1142	0.144923	0.18494	0.258606		0.060327	0.132272	0.149742	0.195783	0.257401	366	382	0.0150602	-0.0180723	-0.00481928	-0.0108434	0.00120482	366	382	0.00791738	0.0187608	0.00499139	0.00938038	0.0111876	0.00395869	0.0136833	0.00585198	0.00929432	0.0322719						0.210843	-0.253012	-0.0674699	-0.151807	0.0168675	2.94684	-1.34803	-1.08525	-1.42227
366	383		2103.13	15	7.10-7.24	0.0461044	0.0873092	0.0928514	0.113494	0.169157		0.035502	0.0803213	0.0971084	0.128514	0.169398	366	383	0.0106024	0.00698795	-0.00425703	-0.0150201	-0.000240964	366	383	0.00803213	0.0225703	0.00337349	0.00361446	0.00104418	0.00522088	0.00779116	0.00248996	0.00369478	0.0258635						0.159036	0.104819	-0.0638554	-0.225301	-0.00361446	1.91694	0.506906	-1.75854	-5.03326
366	384		2216.22	16	7.48-7.56	0.0634789	0.079744	0.113479	0.140964	0.189383		0.0611446	0.0840361	0.105346	0.135467	0.179744	366	384	0.00233434	-0.00429217	0.00813253	0.00549699	0.00963855	366	384	0.0131024	0.0112199	0.00421687	0.00941265	0.00308735	0.0378012	0.00730422	0.00625	0.00888554	0.0141566						0.0373494	-0.0686747	0.13012	0.0879518	0.154217	0.101061	-0.555294	1.86828	0.73555
367	382		1833.95	13	6.49-6.57	0.0705283	0.105746	0.147729	0.177943	0.239852		0.0574606	0.120111	0.151344	0.191103	0.25051	367	382	0.0130677	-0.0143652	-0.00361446	-0.0131603	-0.010658	367	382	0.00759963	0.00936052	0.00565338	0.00231696	0.00889713	0.00926784	0.0100093	0.00908248	0.00333642	0.0167748						0.16988	-0.186747	-0.046988	-0.171084	-0.138554	1.88847	-1.81559	-0.585183	-5.61158
367	383		1990.05	14	6.85-6.92	0.0479346	0.0795181	0.110671	0.130895	0.184596		0.0373494	0.083821	0.110929	0.139243	0.188812	367	383	0.0105852	-0.00430293	-0.000258176	-0.00834768	-0.00421687	367	383	0.00645439	0.00791738	0.00232358	0.00172117	0.00430293	0.00421687	0.00748709	0.00430293	0.00507745	0.0143718						0.148193	-0.060241	-0.00361446	-0.116867	-0.0590361	2.37802	-0.683948	-0.0914425	-2.69687
367	384		2103.13	15	7.10-7.18	0.046988	0.0725301	0.0999197	0.121526	0.176386		0.0387952	0.0787149	0.102651	0.134538	0.18008	367	384	0.00819277	-0.00618474	-0.00273092	-0.013012	-0.00369478	367	384	0.00546185	0.00738956	0.00329317	0.00192771	0.00240964	0.00666667	0.00329317	0.00329317	0.00851406	0.0124498						0.122892	-0.0927711	-0.0409639	-0.195181	-0.0554217	1.64652	-1.32411	-1.01564	-2.58175
368	374		804.34	4	4.32-4.36	0.0162651	0.0641566	0.105723	0.124096	0.251205		0.0114458	0.0650602	0.096988	0.134337	0.253012	368	374	0.00481928	-0.000903614	0.00873494	-0.010241	-0.00180723	368	374	0.000301205	0.010241	0.0063253	0.00240964	0.00210843	0.00361446	0.0060241	0.00662651	0.0129518	0.0228916						0.0192771	-0.00361446	0.0349398	-0.0409639	-0.00722892	2.30142	-0.131728	1.65153	-1.34642
368	382		1720.86	12	6.13-6.22	0.0682731	0.125201	0.158333	0.188454	0.242068		0.0604418	0.121988	0.154618	0.202912	0.258735	368	382	0.00783133	0.00321285	0.00371486	-0.0144578	-0.0166667	368	382	0.011747	0.0194779	0.00773092	0.014257	0.00873494	0.00712851	0.00863454	0.00210843	0.00963855	0.0207831						0.0939759	0.0385542	0.0445783	-0.173494	-0.2	0.987157	0.261186	0.802958	-1.45511
368	384		1990.05	14	6.85-6.92	0.0479346	0.0798623	0.110929	0.129862	0.185714		0.0391566	0.0864028	0.11179	0.140189	0.191652	368	384	0.00877797	-0.00654045	-0.000860585	-0.010327	-0.00593804	368	384	0.00576592	0.0080895	0.00258176	0.00404475	0.00215146	0.00378657	0.00671256	0.00447504	0.00430293	0.0129088						0.122892	-0.0915663	-0.0120482	-0.144578	-0.0831325	2.20406	-1.07768	-0.288515	-3.02885
383	391		1116.52	7	4.36-4.40	0.035284	0.112737	0.224269	0.309639	0.411876		0.0302926	0.123408	0.230809	0.332358	0.42358	383	391	0.00499139	-0.0106713	-0.00654045	-0.0227194	-0.011704	383	391	0.00481928	0.0149742	0.00791738	0.0166954	0.00757315	0.0104991	0.0165232	0.0101549	0.00963855	0.0277108						0.0349398	-0.0746988	-0.0457831	-0.159036	-0.0819277	0.748361	-0.82888	-0.879765	-2.04126
383	392		1229.6	8	6.13-6.20	0.0266566	0.10753	0.190361	0.2875	0.35256		0.0349398	0.133735	0.218072	0.303313	0.383735	383	392	-0.00828313	-0.0262048	-0.0277108	-0.0158133	-0.0311747	383	392	0.00753012	0.0150602	0.00783133	0.0173193	0.00436747	0.00346386	0.00918675	0.0129518	0.0171687	0.0198795						-0.0662651	-0.209639	-0.221687	-0.126506	-0.249398	-1.73091	-2.57286	-3.17116	-1.12312
385	391		847.331	5	3.95-3.98	0.0493976	0.13012	0.210361	0.295181	0.440964		0.0419277	0.144096	0.213012	0.326506	0.464578	385	391	0.00746988	-0.0139759	-0.0026506	-0.0313253	-0.0236145	385	391	0.0115663	0.013494	0.0125301	0.0178313	0.0180723	0.00819277	0.0146988	0.0103614	0.02	0.0272289						0.0373494	-0.0698795	-0.013253	-0.156627	-0.118072	0.912818	-1.21317	-0.282361	-2.02492
385	392		960.415	6	6.19-6.25	0.0365462	0.0943775	0.163655	0.218273	0.342369		0.0297189	0.111647	0.156426	0.245382	0.347791	385	392	0.00682731	-0.0172691	0.00722892	-0.0271084	-0.00542169	385	392	0.00522088	0.0128514	0.00722892	0.0166667	0.00863454	0.00682731	0.0106426	0.00702811	0.0100402	0.0335341						0.0409639	-0.103614	0.0433735	-0.162651	-0.0325301	1.37587	-1.79257	1.24187	-2.41315
397	408		1464.8	10	11.04-11.07	0.230964	0.40253	0.525181	0.583253	0.650482		0.196145	0.435181	0.543373	0.634096	0.661687	397	408	0.0348193	-0.0326506	-0.0181928	-0.0508434	-0.0112048	397	408	0.0266265	0.0336145	0.00590361	0.0109639	0.00204819	0.0219277	0.0245783	0.0231325	0.0133735	0.039759						0.348193	-0.326506	-0.181928	-0.508434	-0.112048	1.74841	-1.35808	-1.31988	-5.09235
399	408		1223.65	8	9.34-9.42	0.0710843	0.137048	0.176657	0.200452	0.243373		0.0456325	0.112048	0.146687	0.185241	0.247741	399	408	0.0254518	0.025	0.0299699	0.0152108	-0.00436747	399	408	0.00963855	0.0115964	0.00783133	0.00903614	0.0228916	0.00150602	0.00768072	0.00316265	0.0060241	0.0248494						0.203614	0.2	0.239759	0.121687	-0.0349398	4.51887	3.11311	6.14615	2.42594
400	408		1110.57	7	8.82-8.91	0.0437177	0.11222	0.166437	0.172461	0.183133		0.0407917	0.120826	0.163167	0.192083	0.185542	400	408	0.00292599	-0.00860585	0.00327022	-0.0196213	-0.00240964	400	408	0.00447504	0.0135972	0.00378657	0.00791738	0.00344234	0.00929432	0.00327022	0.00516351	0.00998279	0.0160069						0.0204819	-0.060241	0.0228916	-0.137349	-0.0168675	0.491294	-1.06584	0.884598	-2.66732
441	457		1710.87	11	8.78-8.85	0.14655	0.347864	0.456517	0.489704	0.518401		0.134283	0.360898	0.453669	0.476561	0.491019	441	457	0.0122673	-0.013034	0.00284775	0.0131435	0.0273823	441	457	0.0119387	0.0242059	0.0075575	0.00887185	0.00142388	0.00963855	0.0216867	0.0175246	0.0296824	0.0504929						0.13494	-0.143373	0.0313253	0.144578	0.301205	1.38476	-0.694633	0.25845	0.734838
471	477		820.364	5	7.40-7.44	0.0448193	0.126747	0.14506	0.18747	0.334217		0.0387952	0.128434	0.145783	0.202169	0.347952	471	477	0.0060241	-0.00168675	-0.000722892	-0.0146988	-0.0137349	471	477	0.0053012	0.0122892	0.00795181	0.0026506	0.00915663	0.00409639	0.00361446	0.00578313	0.00433735	0.0310843						0.0301205	-0.00843373	-0.00361446	-0.073494	-0.0686747	1.55744	-0.228072	-0.127343	-5.00853
478	489		1351.73	10	7.96-8.04	0.0325301	0.0738554	0.10988	0.166024	0.22759		0.0273494	0.0813253	0.115301	0.184217	0.233855	478	489	0.00518072	-0.00746988	-0.00542169	-0.0181928	-0.00626506	478	489	0.00337349	0.00879518	0.0046988	0.00457831	0.00385542	0.00289157	0.0053012	0.00421687	0.00819277	0.0184337						0.0518072	-0.0746988	-0.0542169	-0.181928	-0.0626506	2.01957	-1.2599	-1.48738	-3.35749
479	489		1204.66	9	5.90-5.97	0.0380187	0.0890228	0.132798	0.195047	0.263855		0.0287818	0.0942436	0.131325	0.210576	0.268273	479	489	0.00923695	-0.00522088	0.00147256	-0.0155288	-0.00441767	479	489	0.00682731	0.0105756	0.00481928	0.00589023	0.00348059	0.00589023	0.00548862	0.00535475	0.0064257	0.0240964						0.0831325	-0.046988	0.013253	-0.139759	-0.039759	1.77429	-0.758941	0.354041	-3.08557
479	491		1389.74	11	5.32-5.36	0.0502738	0.0810515	0.117525	0.174042	0.234283		0.0312158	0.0819277	0.117525	0.181928	0.23965	479	491	0.0190581	-0.000876232	0	-0.00788609	-0.00536692	479	491	0.0146769	0.0067908	0.00854326	0.00591457	0.00635268	0.00481928	0.00832421	0.00350493	0.00525739	0.0234392						0.209639	-0.00963855	0	-0.086747	-0.0590361	2.13683	-0.141274	0	-1.72607
479	495		2015.03	15	11.09-11.17	-0.00200803	0.0183133	0.0488353	0.0595181	0.0831325		0.00417671	0.024739	0.0514859	0.0592771	0.0881124	479	495	-0.00618474	-0.0064257	-0.0026506	0.000240964	-0.00497992	479	495	0.0118072	0.00851406	0.00449799	0.00626506	0.00610442	0.0172691	0.0119679	0.00795181	0.0163052	0.015261						-0.0927711	-0.0963855	-0.039759	0.00361446	-0.0746988	-0.512068	-0.757769	-0.502525	0.0238937
480	492		1439.72	11	6.43-6.50	0.0274918	0.0766703	0.0892662	0.149945	0.160898		0.0277108	0.0608981	0.105696	0.163308	0.208762	480	492	-0.000219058	0.0157722	-0.0164294	-0.0133625	-0.0478642	480	492	0.00974808	0.00372399	0.00832421	0.0226725	0.0108434	0.0163198	0.00514786	0.00503834	0.0232202	0.00909091						-0.00240964	0.173494	-0.180723	-0.146988	-0.526506	-0.0199595	4.29963	-2.92455	-0.713166
482	489		891.46	6	4.58-4.64	0.0634538	0.137952	0.207631	0.290361	0.376908		0.0508032	0.149197	0.210442	0.323494	0.399598	482	489	0.0126506	-0.011245	-0.00281124	-0.0331325	-0.0226908	482	489	0.00923695	0.0222892	0.00722892	0.00321285	0.0060241	0.0106426	0.00823293	0.00883534	0.00722892	0.0365462						0.0759036	-0.0674699	-0.0168675	-0.198795	-0.136145	1.55488	-0.819698	-0.426533	-7.25435
501	515		1828.76	12	4.25-4.28	0.106827	0.277912	0.391767	0.457329	0.487149		0.0909639	0.293574	0.391165	0.491466	0.494277	501	515	0.0158635	-0.0156627	0.00060241	-0.0341365	-0.00712851	501	515	0.011747	0.0274096	0.0157631	0.0167671	0.0114458	0.00983936	0.0248996	0.0236948	0.0162651	0.0432731						0.190361	-0.187952	0.00722892	-0.409639	-0.0855422	1.7931	-0.732594	0.0366634	-2.5311
501	520		2449.06	17	7.79-7.88	0.0626506	0.156272	0.224522	0.259603	0.284408		0.0540751	0.176045	0.229908	0.288802	0.287385	501	520	0.00857548	-0.0197732	-0.00538625	-0.0291991	-0.00297661	501	520	0.00871722	0.0163714	0.00439405	0.0100638	0.00843373	0.00935507	0.0133239	0.00999291	0.0148122	0.0211198						0.145783	-0.336145	-0.0915663	-0.496386	-0.0506024	1.16158	-1.62252	-0.854616	-2.82419
502	515		1725.76	11	4.12-4.13	0.111829	0.289595	0.408543	0.474918	0.50471		0.0945235	0.303395	0.403943	0.501314	0.511062	502	515	0.0173056	-0.0138007	0.00460022	-0.0263965	-0.00635268	502	515	0.0105148	0.0178532	0.0108434	0.02092	0.00558598	0.0117196	0.0223439	0.0178532	0.0259584	0.0439211						0.190361	-0.151807	0.0506024	-0.290361	-0.0698795	1.90371	-0.83577	0.381451	-1.37137
518	528		1333.73	9	9.49-9.51	0.00455154	0.00240964	0.0113788	0.0527443	0.231727		0.0060241	0.00147256	0.00535475	0.0461847	0.26158	518	528	-0.00147256	0.000937082	0.0060241	0.00655957	-0.0298527	518	528	0.00307898	0.00281124	0.00120482	0.00789826	0.0021419	0.0038822	0.00187416	0.00495315	0.0042838	0.00696118						-0.013253	0.00843373	0.0542169	0.0590361	-0.268675	-0.514746	0.480384	2.04686	1.26447
521	542		2590.47	20	8.51-8.62	0.0904819	0.198916	0.346446	0.44747	0.551084		0.071988	0.214699	0.366506	0.490361	0.562229	521	542	0.018494	-0.0157831	-0.0200602	-0.0428916	-0.0111446	521	542	0.0115663	0.0153012	0.0134337	0.00831325	0.013012	0.00644578	0.00216867	0.0174699	0.0154217	0.0361446						0.36988	-0.315663	-0.401205	-0.857831	-0.222892	2.41917	-1.76892	-1.57663	-4.2404
528	537		1113.69	8	5.45-5.50	0.111295	0.320633	0.545482	0.623946	0.63991		0.0879518	0.325	0.529217	0.632229	0.629518	528	537	0.0233434	-0.00436747	0.0162651	-0.00828313	0.0103916	528	537	0.013253	0.022741	0.0100904	0.0144578	0.00587349	0.0115964	0.0198795	0.026506	0.0173193	0.0439759						0.186747	-0.0349398	0.13012	-0.0662651	0.0831325	2.29594	-0.250444	0.993309	-0.63592
528	542		1714.03	13	8.04-8.14	0.104819	0.275255	0.513438	0.618814	0.658665		0.0897127	0.304912	0.54152	0.656256	0.673772	528	542	0.0151066	-0.0296571	-0.0280816	-0.0374421	-0.0151066	528	542	0.0113994	0.00936052	0.00620945	0.0126043	0.0102873	0.00917516	0.00797034	0.031418	0.0240037	0.0375348						0.196386	-0.385542	-0.36506	-0.486747	-0.196386	1.78808	-4.17822	-1.51874	-2.39201
529	537		1000.6	7	5.42-5.48	0.116695	0.326162	0.530465	0.602582	0.611015		0.0950086	0.353356	0.546644	0.643718	0.619277	529	537	0.0216867	-0.0271945	-0.016179	-0.041136	-0.00826162	529	537	0.013253	0.0199656	0.0246127	0.0213425	0.00292599	0.0123924	0.016179	0.0211704	0.0256454	0.0306368						0.151807	-0.190361	-0.113253	-0.287952	-0.0578313	2.07022	-1.83292	-0.863173	-2.13549
530	542		1487.86	11	7.36-7.46	0.10701	0.278204	0.521687	0.625739	0.662212		0.0903614	0.314458	0.557174	0.664841	0.699452	530	542	0.0166484	-0.0362541	-0.0354874	-0.0391019	-0.0372399	530	542	0.0118291	0.00744797	0.00711939	0.00799562	0.011172	0.00777656	0.0170865	0.0245345	0.0129244	0.0460022						0.183133	-0.398795	-0.390361	-0.43012	-0.409639	2.03695	-3.36891	-2.40604	-4.45635
542	551		1147.6	8	9.07-9.13	0.0138554	0.0233434	0.0323795	0.0829819	0.167169		0.0123494	0.0281627	0.0237952	0.0894578	0.172892	542	551	0.00150602	-0.00481928	0.00858434	-0.0064759	-0.00572289	542	551	0.0150602	0.0120482	0.00783133	0.00361446	0.0123494	0.00436747	0.0207831	0.00662651	0.0149096	0.00150602						0.0120482	-0.0385542	0.0686747	-0.0518072	-0.0457831	0.166351	-0.34747	1.44936	-0.731128
543	555		1496.81	11	10.68-10.73	-0.00164294	0.00460022	0.0167579	0.0537788	0.140088		-0.000547645	0.00744797	0.0138007	0.0627601	0.150383	543	555	-0.00109529	-0.00284775	0.00295728	-0.00898138	-0.0102957	543	555	0.00164294	0.00492881	0.00284775	0.00306681	0.00372399	0.00230011	0.00525739	0.00328587	0.00383352	0.00810515						-0.0120482	-0.0313253	0.0325301	-0.0987952	-0.113253	-0.671156	-0.684448	1.178	-3.16872
549	555		850.503	5	7.46-7.55	0.00313253	0.00987952	0.0086747	0.02	0.0759036		-0.00361446	-0.00337349	0.000240964	0.0101205	0.0609639	549	555	0.00674699	0.013253	0.00843373	0.00987952	0.0149398	549	555	0.00144578	0.00144578	0.00746988	0.00819277	0.00433735	0.00192771	0.0026506	0.00216867	0.00433735	0.00385542						0.0337349	0.0662651	0.0421687	0.0493976	0.0746988	4.84974	7.6028	1.878	1.84592
553	573		2520.42	19	4.71-4.78	0.073811	0.207356	0.32955	0.445022	0.495054		0.0634115	0.206848	0.342486	0.481928	0.508751	553	573	0.0103995	0.000507292	-0.012936	-0.0369055	-0.0136969	553	573	0.0112238	0.0223209	0.011858	0.0065948	0.0076728	0.0060241	0.0220672	0.0161065	0.0141408	0.0356373						0.19759	0.00963855	-0.245783	-0.701205	-0.260241	1.41404	0.0279937	-1.12024	-4.0968
555	572		2171.21	16	3.94-3.98	0.0746988	0.208208	0.357681	0.463479	0.4875		0.0601657	0.230648	0.362575	0.497741	0.499322	555	572	0.0145331	-0.0224398	-0.00489458	-0.034262	-0.0118223	555	572	0.00896084	0.00918675	0.0143072	0.00835843	0.00625	0.00737952	0.0146084	0.021009	0.0183735	0.0400602						0.23253	-0.359036	-0.0783133	-0.548193	-0.189157	2.16845	-2.25224	-0.333529	-2.93993
556	573		2171.21	16	3.94-3.98	0.0746988	0.208208	0.357681	0.463479	0.4875		0.0601657	0.230648	0.362575	0.497741	0.499322	556	573	0.0145331	-0.0224398	-0.00489458	-0.034262	-0.0118223	556	573	0.00896084	0.00918675	0.0143072	0.00835843	0.00625	0.00737952	0.0146084	0.021009	0.0183735	0.0400602						0.23253	-0.359036	-0.0783133	-0.548193	-0.189157	2.16845	-2.25224	-0.333529	-2.93993
558	573		1912.07	14	3.92-3.96	0.0748709	0.222031	0.366093	0.464286	0.465146		0.076506	0.235112	0.375473	0.497935	0.479948	558	573	-0.00163511	-0.0130809	-0.00938038	-0.0336489	-0.0148021	558	573	0.0106713	0.0142857	0.0236661	0.00516351	0.01179	0.00981067	0.0254733	0.0198795	0.0301205	0.0462134						-0.0228916	-0.183133	-0.131325	-0.471084	-0.207229	-0.195375	-0.775766	-0.525673	-1.90713
574	585		1344.67	10	9.00-9.06	0.160964	0.335783	0.470843	0.614819	0.615301		0.126265	0.32988	0.456506	0.632892	0.632651	574	585	0.0346988	0.00590361	0.0143373	-0.0180723	-0.0173494	574	585	0.0204819	0.0346988	0.0187952	0.0220482	0.00542169	0.0171084	0.0250602	0.0222892	0.0183133	0.0128916						0.346988	0.0590361	0.143373	-0.180723	-0.173494	2.25202	0.238898	0.851733	-1.09212
588	599		1345.79	7	11.87-11.93	0.00946644	0.0557659	0.250258	0.450258	0.59432		0.0292599	0.0762478	0.258003	0.483993	0.614802	588	599	-0.0197935	-0.0204819	-0.00774527	-0.0337349	-0.0204819	588	599	0.0142857	0.0149742	0.0166954	0.0256454	0.019105	0.011704	0.013253	0.0203098	0.0182444	0.0473322						-0.138554	-0.143373	-0.0542169	-0.236145	-0.143373	-1.85637	-1.77408	-0.510256	-1.85653
588	608		2353.4	15	10.92-10.97	0.02249	0.102008	0.334056	0.62008	0.733976		0.0200803	0.112851	0.343133	0.651888	0.76755	588	608	0.00240964	-0.0108434	-0.00907631	-0.0318072	-0.0335743	588	608	0.000562249	0.00843373	0.0142169	0.00955823	0.00481928	0.00192771	0.00409639	0.0185542	0.0111647	0.00353414						0.0361446	-0.162651	-0.136145	-0.477108	-0.503614	2.07846	-2.00313	-0.672548	-3.74844
588	609		2424.44	16	10.93-10.97	0.0231175	0.114684	0.340211	0.600753	0.716416		0.0179217	0.125452	0.37884	0.643901	0.74488	588	609	0.00519578	-0.0107681	-0.0386295	-0.0431476	-0.0284639	588	609	0.000753012	0.0123494	0.0137801	0.0176205	0.00978916	0.00474398	0.0100151	0.0135542	0.0144578	0.0138554						0.0831325	-0.172289	-0.618072	-0.690361	-0.455422	1.87355	-1.17301	-3.46156	-3.27884
588	610		2525.48	17	10.80-10.88	0.0300496	0.124663	0.363714	0.625159	0.731184		0.0238129	0.133097	0.374415	0.658611	0.74146	588	610	0.00623671	-0.00843373	-0.0107016	-0.0334515	-0.0102764	588	610	0.00559887	0.0115521	0.00935507	0.0146704	0.00354359	0.000921332	0.00248051	0.0133239	0.0131821	0.0262934						0.106024	-0.143373	-0.181928	-0.568675	-0.174699	1.90377	-1.23632	-1.13855	-2.93769
590	611		2410.46	16	10.88-10.93	0.0298946	0.135542	0.41363	0.665512	0.755648		0.0245482	0.15113	0.42628	0.705873	0.773193	590	611	0.00534639	-0.0155873	-0.0126506	-0.0403614	-0.0175452	590	611	0.00474398	0.00888554	0.0163404	0.013253	0.00534639	0.00549699	0.00421687	0.014006	0.0176958	0.0487199						0.0855422	-0.249398	-0.20241	-0.645783	-0.280723	1.27533	-2.74499	-1.01812	-3.16205
612	621		1104.6	7	9.43-9.49	0.146644	0.262134	0.442169	0.565749	0.680895		0.120138	0.275904	0.455938	0.607401	0.688812	612	621	0.026506	-0.0137694	-0.0137694	-0.0416523	-0.00791738	612	621	0.0163511	0.0223752	0.00654045	0.0196213	0.00120482	0.0127367	0.0134251	0.0148021	0.0130809	0.0466437						0.185542	-0.0963855	-0.0963855	-0.291566	-0.0554217	2.21504	-0.913982	-1.47375	-3.05929
615	624		1164.64	7	9.01-9.09	0.095525	0.17401	0.270052	0.469535	0.584682		0.0726334	0.177625	0.273494	0.498279	0.590878	615	624	0.0228916	-0.00361446	-0.00344234	-0.0287435	-0.00619621	615	624	0.00774527	0.019105	0.0101549	0.00413081	0.00516351	0.0113597	0.0180723	0.0134251	0.0184165	0.0371773						0.160241	-0.0253012	-0.0240964	-0.201205	-0.0433735	2.88382	-0.238053	-0.3542	-2.63776
622	640		2199.06	16	7.89-7.94	0.0478163	0.105045	0.151657	0.211898	0.229217		0.0381024	0.109639	0.157756	0.240512	0.244578	622	640	0.00971386	-0.00459337	-0.0060994	-0.0286145	-0.0153614	622	640	0.00722892	0.00203313	0.00956325	0.0103163	0.00391566	0.00692771	0.00745482	0.00662651	0.0167169	0.0336596						0.155422	-0.073494	-0.0975904	-0.457831	-0.245783	1.68039	-1.02962	-0.908013	-2.52302
622	641		2312.15	17	8.59-8.64	0.0330971	0.0788094	0.129766	0.172785	0.223033		0.0305457	0.0890858	0.131184	0.185755	0.225868	622	641	0.00255138	-0.0102764	-0.00141743	-0.0129695	-0.00283487	622	641	0.00503189	0.0112686	0.00219702	0.00496102	0.00255138	0.00205528	0.00729979	0.00382707	0.00850461	0.0189936						0.0433735	-0.174699	-0.0240964	-0.220482	-0.0481928	0.813019	-1.32569	-0.556343	-2.28157
623	641		2165.08	16	8.10-8.16	0.0185241	0.0697289	0.11875	0.168148	0.202184		0.0271837	0.090738	0.126205	0.174473	0.207982	623	641	-0.00865964	-0.021009	-0.00745482	-0.0063253	-0.00579819	623	641	0.00414157	0.0125	0.00850904	0.00572289	0.00165663	0.00700301	0.00790663	0.00941265	0.0114458	0.0169428						-0.138554	-0.336145	-0.119277	-0.101205	-0.0927711	-1.84352	-2.46024	-1.01761	-0.856133
623	646		2805.41	21	8.07-8.14	0.0396443	0.0869765	0.170166	0.183534	0.247963		0.0204819	0.0856569	0.138153	0.188526	0.241423	623	646	0.0191624	0.00131956	0.0320138	-0.00499139	0.00654045	623	646	0.010327	0.0189902	0.0193345	0.00527826	0.00304073	0.00315548	0.00533563	0.00590935	0.00659782	0.0183018						0.40241	0.0277108	0.672289	-0.104819	0.137349	3.07363	0.115867	2.74266	-1.0232
632	640		1026.51	7	6.07-6.14	-0.0199656	-0.0285714	-0.0215146	-0.0115318	-0.00258176		-0.024957	-0.0246127	-0.0172117	-0.00791738	0.00619621	632	640	0.00499139	-0.00395869	-0.00430293	-0.00361446	-0.00877797	632	640	0.0125645	0.00567986	0.00740103	0.0180723	0.00516351	0.00895009	0.00585198	0.00946644	0.0101549	0.0201377						0.0349398	-0.0277108	-0.0301205	-0.0253012	-0.0614458	0.560428	-0.840776	-0.620237	-0.301999
632	641		1139.6	8	7.74-7.84	0.00451807	0.00301205	0.0129518	0.0260542	0.110693		-0.00512048	0.00406627	0.00722892	0.0263554	0.101054	632	641	0.00963855	-0.00105422	0.00572289	-0.000301205	0.00963855	632	641	0.00572289	0.010994	0.00376506	0.000903614	0.00346386	0.0061747	0.00858434	0.00150602	0.0061747	0.00180723						0.0771084	-0.00843373	0.0457831	-0.00240964	0.0771084	1.98297	-0.130908	2.44442	-0.0835998
632	645		1666.84	12	6.55-6.61	0.0207831	0.0294177	0.076004	0.103916	0.223594		0.00512048	0.0305221	0.0746988	0.112249	0.224799	632	645	0.0156627	-0.00110442	0.00130522	-0.00833333	-0.00120482	632	645	0.0178715	0.00311245	0.00763052	0.00190763	0.00512048	0.00140562	0.00301205	0.00200803	0.00522088	0.0165663						0.187952	-0.013253	0.0156627	-0.1	-0.0144578	1.5133	-0.441652	0.286517	-2.59671
632	646		1779.93	13	7.79-7.86	0.0179796	0.0286376	0.0646895	0.136423	0.222521		0.0102873	0.0284523	0.0674699	0.142725	0.191381	632	646	0.00769231	0.000185357	-0.00278035	-0.00630213	0.0311399	632	646	0.0108434	0.00648749	0.00898981	0.0203892	0.0223355	0.00379981	0.00722892	0.00463392	0.0195551	0.0134384						0.1	0.00240964	-0.0361446	-0.0819277	0.404819	1.15958	0.033053	-0.47615	-0.386378
632	648		2006.09	15	9.42-9.47	0.0208835	0.0232129	0.0719679	0.0926908	0.179357		0.0114056	0.0295582	0.0571888	0.0914056	0.173815	632	648	0.00947791	-0.00634538	0.0147791	0.00128514	0.00554217	632	648	0.0144578	0.00136546	0.00803213	0.0161446	0.0110843	0.00730924	0.00361446	0.00281124	0.00682731	0.00987952						0.142169	-0.0951807	0.221687	0.0192771	0.0831325	1.01332	-2.8445	3.00805	0.126987
642	648		884.508	5	9.06-9.15	0.000240964	0.00313253	0.00915663	0.0187952	0.0325301		0.00481928	0.00939759	0.0122892	0.0228916	0.0440964	642	648	-0.00457831	-0.00626506	-0.00313253	-0.00409639	-0.0115663	642	648	0.00506024	0.00674699	0.00506024	0.00698795	0.00240964	0.00240964	0.00168675	0.00144578	0.00289157	0.00457831						-0.0228916	-0.0313253	-0.0156627	-0.0204819	-0.0578313	-1.41487	-1.56031	-1.03097	-0.938191
647	653		798.521	5	11.71-11.74	0.00337349	0.00120482	0.0060241	0.0137349	0.0163855		0.00337349	0.00506024	0.00722892	0.00506024	0.0115663	647	653	0	-0.00385542	-0.00120482	0.0086747	0.00481928	647	653	0.00481928	0.00385542	0.00771084	0.00168675	0.00939759	0.00722892	0.00626506	0.00433735	0.00795181	0.000963855						0	-0.0192771	-0.0060241	0.0433735	0.0240964	0	-0.907763	-0.235877	1.84838
653	664		1486.82	10	7.86-7.94	-0.0120482	0.00927711	0.043494	0.10988	0.199398		-0.00518072	0.020241	0.0548193	0.133855	0.215422	653	664	-0.00686747	-0.0109639	-0.0113253	-0.0239759	-0.0160241	653	664	0.00204819	0.00614458	0.00819277	0.0155422	0.0046988	0.00144578	0.00506024	0.00337349	0.00638554	0.0103614						-0.0686747	-0.109639	-0.113253	-0.239759	-0.160241	-4.74451	-2.38567	-2.21396	-2.47146
654	663		1258.71	8	6.57-6.64	-0.000451807	0.0161145	0.0406627	0.145783	0.250753		0.00120482	0.0179217	0.0534639	0.142319	0.25497	654	663	-0.00165663	-0.00180723	-0.0128012	0.00346386	-0.00421687	654	663	0.00376506	0.00436747	0.0126506	0.00873494	0.00240964	0.00150602	0.014006	0.0260542	0.00496988	0.0123494						-0.013253	-0.0144578	-0.10241	0.0277108	-0.0337349	-0.707594	-0.213358	-0.765538	0.596983
654	665		1486.82	10	7.85-7.94	-0.00301205	0.00746988	0.0426506	0.119157	0.198554		-0.00518072	0.020241	0.0548193	0.133855	0.215422	654	665	0.00216867	-0.0127711	-0.0121687	-0.0146988	-0.0168675	654	665	0.00987952	0.00686747	0.00819277	0.0114458	0.0046988	0.00144578	0.00506024	0.00337349	0.00638554	0.0103614						0.0216867	-0.127711	-0.121687	-0.146988	-0.168675	0.376199	-2.59309	-2.37883	-1.94247
658	664		886.487	5	4.78-4.82	0.00771084	0.0460241	0.133253	0.280723	0.538795		-0.0053012	0.0462651	0.116386	0.283855	0.556386	658	664	0.013012	-0.000240964	0.0168675	-0.00313253	-0.0175904	658	664	0.0175904	0.0228916	0.013012	0.0209639	0.0240964	0.0060241	0.013012	0.00939759	0.0195181	0.0301205						0.0650602	-0.00120482	0.0843373	-0.0156627	-0.0879518	1.21213	-0.0158504	1.82018	-0.189423
664	673		1188.71	7	9.26-9.33	0.00481928	0.0173838	0.0428571	0.153873	0.292255		0.00533563	0.016179	0.0449225	0.168503	0.302065	664	673	-0.000516351	0.00120482	-0.0020654	-0.0146299	-0.00981067	664	673	0.00154905	0.00154905	0.00309811	0.00464716	0.00240964	0.00172117	0.00258176	0.000516351	0.0020654	0.0177281						-0.00361446	0.00843373	-0.0144578	-0.10241	-0.0686747	-0.386227	0.693103	-1.13899	-4.98279
664	684		2424.29	18	10.32-10.37	0.0195448	0.0463855	0.0706827	0.115462	0.204418		0.0157296	0.0488621	0.0722892	0.123561	0.208166	664	684	0.00381526	-0.00247657	-0.00160643	-0.00809906	-0.00374833	664	684	0.000401606	0.00575636	0.004083	0.00174029	0.00227577	0.0019411	0.004083	0.000669344	0.00301205	0.0123829						0.0686747	-0.0445783	-0.0289157	-0.145783	-0.0674699	3.33377	-0.607811	-0.672486	-4.03259
665	684		2309.26	17	9.65-9.71	0.0180014	0.0428774	0.0706591	0.108717	0.1927		0.0103473	0.0467045	0.0710135	0.112828	0.191708	665	684	0.00765415	-0.00382707	-0.000354359	-0.00411056	0.000992204	665	684	0.00127569	0.00481928	0.00113395	0.0032601	0.00262225	0.000779589	0.00297661	0.00566974	0.00113395	0.0128987						0.13012	-0.0650602	-0.0060241	-0.0698795	0.0168675	8.86756	-1.17023	-0.106151	-2.06268
666	673		960.601	5	7.65-7.74	0.0137349	0.0207229	0.060241	0.211084	0.401446		0.00915663	0.0224096	0.0640964	0.22747	0.423855	666	673	0.00457831	-0.00168675	-0.00385542	-0.0163855	-0.0224096	666	673	0.000481928	0.00650602	0.00578313	0.00313253	0.00481928	0.000240964	0.00361446	0.00409639	0.000481928	0.026747						0.0228916	-0.00843373	-0.0192771	-0.0819277	-0.112048	14.7173	-0.392541	-0.942264	-8.95461
666	684		2196.18	16	9.28-9.32	0.0168675	0.0441265	0.0709337	0.122816	0.206024		0.0164157	0.0515813	0.0719127	0.122364	0.209413	666	684	0.000451807	-0.00745482	-0.000978916	0.000451807	-0.00338855	666	684	0.00233434	0.00436747	0.000903614	0.021988	0.00715361	0.00436747	0.00316265	0.00218373	0.00745482	0.0129518						0.00722892	-0.119277	-0.0156627	0.00722892	-0.0542169	0.158022	-2.39454	-0.71744	0.0337056
666	685		2309.26	17	9.65-9.71	0.0180014	0.0428774	0.0706591	0.108717	0.1927		0.0103473	0.0467045	0.0710135	0.112828	0.191708	666	685	0.00765415	-0.00382707	-0.000354359	-0.00411056	0.000992204	666	685	0.00127569	0.00481928	0.00113395	0.0032601	0.00262225	0.000779589	0.00297661	0.00566974	0.00113395	0.0128987						0.13012	-0.0650602	-0.0060241	-0.0698795	0.0168675	8.86756	-1.17023	-0.106151	-2.06268
683	696		1544.81	11	10.23-10.29	0.033954	0.101533	0.159912	0.19989	0.289376		0.0231106	0.10241	0.150493	0.1977	0.283352	683	696	0.0108434	-0.000876232	0.0094195	0.00219058	0.0060241	683	696	0.0115005	0.00898138	0.00963855	0.0102957	0.00503834	0.00624315	0.0106243	0.0199343	0.00821468	0.0238773						0.119277	-0.00963855	0.103614	0.0240964	0.0662651	1.43523	-0.109092	0.73683	0.288066
685	691		712.412	4	6.67-6.73	0.0409639	0.133735	0.201506	0.228012	0.266265		0.0322289	0.148494	0.209639	0.244277	0.300602	685	691	0.00873494	-0.014759	-0.00813253	-0.0162651	-0.0343373	685	691	0.0325301	0.0171687	0.0216867	0.00722892	0.0063253	0.00180723	0.00451807	0.00933735	0.00240964	0.0207831						0.0349398	-0.0590361	-0.0325301	-0.0650602	-0.137349	0.464372	-1.43993	-0.596573	-3.69713
685	692		841.455	5	6.56-6.63	0.0250602	0.0946988	0.153253	0.17494	0.293012		0.0166265	0.102169	0.157831	0.193012	0.309639	685	692	0.00843373	-0.00746988	-0.00457831	-0.0180723	-0.0166265	685	692	0.00457831	0.00891566	0.000963855	0.00168675	0.00120482	0.00192771	0.00313253	0.00698795	0.00433735	0.0224096						0.0421687	-0.0373494	-0.0228916	-0.0903614	-0.0831325	2.94059	-1.36913	-1.12415	-6.72616
685	694		1053.61	7	9.82-9.86	0.0156627	0.0581756	0.0982788	0.114458	0.206024		0.0104991	0.0681583	0.102238	0.128571	0.218244	685	694	0.00516351	-0.00998279	-0.00395869	-0.0141136	-0.0122203	685	694	0.00189329	0.00654045	0.00258176	0.000860585	0.00120482	0.00154905	0.00258176	0.00309811	0.00240964	0.0135972						0.0361446	-0.0698795	-0.0277108	-0.0987952	-0.0855422	3.656	-2.45901	-1.70021	-9.55385
693	703		1221.59	9	9.47-9.53	0.0164659	0.0626506	0.233333	0.442303	0.559036		0.013253	0.0728246	0.249531	0.457831	0.559973	693	703	0.00321285	-0.010174	-0.0161981	-0.0155288	-0.000937082	693	703	0.00147256	0.00441767	0.00709505	0.00870147	0.0103079	0.000803213	0.00200803	0.00977242	0.0200803	0.0410977						0.0289157	-0.0915663	-0.145783	-0.139759	-0.00843373	3.31758	-3.63142	-2.3232	-1.22902
695	703		1009.44	7	8.70-8.73	0.0113597	0.0741824	0.258348	0.441136	0.551463		0.00998279	0.0767642	0.271773	0.478141	0.551119	695	703	0.00137694	-0.00258176	-0.0134251	-0.0370052	0.000344234	695	703	0.0020654	0.00929432	0.0127367	0.00447504	0.00344234	0.000860585	0.0010327	0.00757315	0.00671256	0.0358003						0.00963855	-0.0180723	-0.0939759	-0.259036	0.00240964	1.06588	-0.478183	-1.56923	-7.94482
704	718		1635.8	11	6.19-6.26	0.0909091	0.152464	0.224973	0.33034	0.40701		0.0752464	0.166156	0.224096	0.354217	0.411281	704	718	0.0156627	-0.0136911	0.000876232	-0.0238773	-0.00427163	704	718	0.0136911	0.0166484	0.00952903	0.0125958	0.00438116	0.00887185	0.0150055	0.0124863	0.0110624	0.0350493						0.172289	-0.150602	0.00963855	-0.262651	-0.046988	1.66287	-1.05804	0.0966243	-2.46699
704	719		1706.84	12	6.51-6.57	0.104618	0.206627	0.28253	0.377209	0.449197		0.0861446	0.217771	0.283835	0.413353	0.460743	704	719	0.0184739	-0.0111446	-0.00130522	-0.0361446	-0.0115462	704	719	0.0186747	0.0165663	0.00532129	0.012249	0.00471888	0.0118474	0.0181727	0.0140562	0.0165663	0.0363454						0.221687	-0.133735	-0.0156627	-0.433735	-0.138554	1.44683	-0.78498	-0.150416	-3.03861
704	720		1835.88	13	6.45-6.50	0.126969	0.230399	0.304263	0.39759	0.463577		0.109546	0.246154	0.309453	0.431696	0.472104	704	720	0.0174235	-0.0157553	-0.00518999	-0.0341057	-0.00852641	704	720	0.0147359	0.0218721	0.0121409	0.0104727	0.00518999	0.0113068	0.0176089	0.0125116	0.0118628	0.0355885						0.226506	-0.204819	-0.0674699	-0.443373	-0.110843	1.62478	-0.971846	-0.515624	-3.73308
709	718		970.436	7	9.31-9.39	0.0166954	0.0407917	0.128227	0.212048	0.293115		0.0111876	0.0454389	0.13821	0.23253	0.326506	709	718	0.00550775	-0.00464716	-0.00998279	-0.0204819	-0.0333907	709	718	0.0060241	0.0108434	0.00447504	0.00344234	0.00481928	0.00344234	0.00137694	0.00361446	0.00447504	0.0010327						0.0385542	-0.0325301	-0.0698795	-0.143373	-0.233735	1.37494	-0.736394	-3.00581	-6.2835
725	731		726.337	5	4.55-4.60	-0.000481928	0.000963855	0.0103614	0.00771084	0.00722892		-0.00626506	-0.00216867	0.00240964	0.00192771	0.00650602	725	731	0.00578313	0.00313253	0.00795181	0.00578313	0.000722892	725	731	0.00240964	0.0053012	0.0026506	0.00144578	0.00240964	0.0026506	0.00337349	0.00216867	0.000722892	0.00361446						0.0289157	0.0156627	0.039759	0.0289157	0.00361446	2.79625	0.863475	4.0216	6.19677
725	732		889.4	6	6.21-6.27	0.00863454	0.0106426	0.0126506	0.0140562	0.0116466		0.00361446	0.00180723	0.0100402	0.00863454	0.00722892	725	732	0.00502008	0.00883534	0.00261044	0.00542169	0.00441767	725	732	0.00261044	0.00100402	0.00542169	0.00923695	0.00722892	0.00120482	0.00381526	0.00401606	0.00140562	0.00120482						0.0301205	0.053012	0.0156627	0.0325301	0.026506	3.02429	3.879	0.670127	1.00507
732	749		2063.05	16	12.41-12.45	0.0283886	0.0579066	0.0807982	0.101807	0.180422		0.0323795	0.0586596	0.0725151	0.102937	0.181702	732	749	-0.00399096	-0.000753012	0.00828313	-0.00112952	-0.00128012	732	749	0.00504518	0.0164157	0.00813253	0.00218373	0.0159639	0.00798193	0.00572289	0.0149096	0.00971386	0.0110693						-0.0638554	-0.0120482	0.13253	-0.0180723	-0.0204819	-0.732051	-0.0750234	0.844755	-0.196497
732	750		2176.14	17	12.71-12.77	0.0301914	0.0520907	0.0721474	0.096669	0.169667		0.0362863	0.054713	0.0742027	0.1073	0.179022	732	750	-0.00609497	-0.00262225	-0.00205528	-0.0106308	-0.00935507	732	750	0.00354359	0.00779589	0.00163005	0.00510276	0.0080085	0.00382707	0.0135365	0.00630758	0.00737066	0.0134656						-0.103614	-0.0445783	-0.0349398	-0.180723	-0.159036	-2.02404	-0.290756	-0.546425	-2.05396
733	750		2013.07	16	12.35-12.43	0.0318524	0.0487952	0.0750753	0.098494	0.182078		0.028238	0.0554217	0.078991	0.106702	0.1875	733	750	0.00361446	-0.00662651	-0.00391566	-0.00820783	-0.00542169	733	750	0.00195783	0.00466867	0.00248494	0.00376506	0.00180723	0.00338855	0.00233434	0.00466867	0.0059488	0.0142319						0.0578313	-0.106024	-0.0626506	-0.131325	-0.086747	1.5997	-2.19886	-1.28236	-2.01933
735	750		1810.99	14	10.81-11.05	0.0256454	0.0345095	0.0422547	0.0592943	0.131067		0.0267642	0.0407917	0.0425129	0.0637694	0.129088	735	750	-0.00111876	-0.00628227	-0.000258176	-0.00447504	0.00197935	735	750	0.00550775	0.00499139	0.00395869	0.00731497	0.00550775	0.00189329	0.00438898	0.00533563	0.0035284	0.013253						-0.0156627	-0.0879518	-0.00361446	-0.0626506	0.0277108	-0.332714	-1.63711	-0.0673068	-0.954383
736	750		1697.91	13	10.34-10.39	0.0295644	0.039759	0.0484708	0.0651529	0.143281		0.0246525	0.0399444	0.0490269	0.0696015	0.142725	736	750	0.00491196	-0.000185357	-0.00055607	-0.00444856	0.00055607	736	750	0.00231696	0.00278035	0.00287303	0.0012975	0.00101946	0.000648749	0.000926784	0.00194625	0.00305839	0.0094532						0.0638554	-0.00240964	-0.00722892	-0.0578313	0.00722892	3.53595	-0.109545	-0.277548	-2.31926
736	751		1810.99	14	11.02-11.07	0.0212565	0.0363167	0.0405336	0.0543029	0.127539		0.0182444	0.0303787	0.0379518	0.0610155	0.12315	736	751	0.00301205	0.00593804	0.00258176	-0.00671256	0.00438898	736	751	0.0020654	0.00283993	0.00370052	0.00215146	0.00223752	0.00309811	0.00645439	0.00593804	0.0060241	0.00989673						0.0421687	0.0831325	0.0361446	-0.0939759	0.0614458	1.40112	1.45854	0.639118	-1.81756
737	749		1483.78	11	9.19-9.25	0.0322015	0.0456736	0.0601314	0.0803943	0.174261		0.0276013	0.0487404	0.0606791	0.0884995	0.17667	737	749	0.00460022	-0.00306681	-0.000547645	-0.00810515	-0.00240964	737	749	0.0041621	0.00558598	0.00153341	0.0026287	0.00131435	0.00317634	0.00230011	0.00142388	0.00361446	0.0144578						0.0506024	-0.0337349	-0.0060241	-0.0891566	-0.026506	1.52183	-0.879304	-0.453298	-3.14113
737	750		1596.86	12	10.29-10.33	0.027008	0.0364458	0.0466867	0.0624498	0.142871		0.0222892	0.0398594	0.0473896	0.0683735	0.144277	737	750	0.00471888	-0.00341365	-0.000702811	-0.00592369	-0.00140562	737	750	0.00301205	0.00281124	0.00190763	0.00210843	0.00281124	0.00220884	0.00251004	0.00210843	0.00281124	0.00993976						0.0566265	-0.0409639	-0.00843373	-0.0710843	-0.0168675	2.18822	-1.56886	-0.428126	-2.91974
737	751		1709.95	13	10.97-11.02	0.0257646	0.0367006	0.0476367	0.0664504	0.140408		0.0211307	0.0385542	0.0512512	0.0721038	0.144022	737	751	0.00463392	-0.00185357	-0.00361446	-0.00565338	-0.00361446	737	751	0.00417053	0.00435589	0.00148285	0.00352178	0.00250232	0.00305839	0.00176089	0.00240964	0.00268767	0.00231696						0.060241	-0.0240964	-0.046988	-0.073494	-0.046988	1.55193	-0.68332	-2.21267	-2.21028
738	750		1433.8	11	9.77-9.82	0.0282585	0.0404162	0.0518072	0.0726177	0.15575		0.0245345	0.0447974	0.053012	0.0814896	0.159365	738	750	0.00372399	-0.00438116	-0.00120482	-0.00887185	-0.00361446	738	750	0.00306681	0.00525739	0.00164294	0.00306681	0.00142388	0.0041621	0.00306681	0.00230011	0.00120482	0.0110624						0.0409639	-0.0481928	-0.013253	-0.0975904	-0.039759	1.24762	-1.24676	-0.738272	-4.6636
738	751		1546.88	12	10.59-10.67	0.0340361	0.0354418	0.0476908	0.0717871	0.139357		0.0248996	0.0406627	0.0498996	0.0785141	0.147892	738	751	0.00913655	-0.00522088	-0.00220884	-0.00672691	-0.00853414	738	751	0.00953815	0.00251004	0.00903614	0.00953815	0.00592369	0.00180723	0.0060241	0.0135542	0.0151606	0.0106426						0.109639	-0.0626506	-0.026506	-0.0807229	-0.10241	1.63012	-1.38564	-0.234855	-0.650496
739	751		1433.8	11	9.77-9.82	0.0305586	0.0427163	0.0541073	0.0751369	0.157722		0.0266156	0.046988	0.0545455	0.0835706	0.161884	739	751	0.00394304	-0.00427163	-0.000438116	-0.00843373	-0.0041621	739	751	0.00306681	0.00525739	0.00164294	0.00219058	0.00164294	0.00405257	0.00306681	0.00295728	0.00131435	0.011391						0.0433735	-0.046988	-0.00481928	-0.0927711	-0.0457831	1.34382	-1.21559	-0.224309	-5.7181
750	757		872.569	6	6.02-6.11	0.0497992	0.150402	0.184137	0.18996	0.20241		0.0477912	0.163253	0.188956	0.210843	0.207028	750	757	0.00200803	-0.0128514	-0.00481928	-0.0208835	-0.00461847	750	757	0.00722892	0.00963855	0.0060241	0.00522088	0.00321285	0.00401606	0.00742972	0.00502008	0.0064257	0.0196787						0.0120482	-0.0771084	-0.0289157	-0.125301	-0.0277108	0.420579	-1.82907	-1.06448	-4.36887
750	763		1588.9	12	9.49-9.54	0.00502008	0.0374498	0.062249	0.129016	0.154418		0.00592369	0.0394578	0.065261	0.122791	0.177811	750	763	-0.000903614	-0.00200803	-0.00301205	0.0062249	-0.0233936	750	763	0.00100402	0.00130522	0.0138554	0.0390562	0.00662651	0.00702811	0.00692771	0.0113454	0.0173695	0.0209839						-0.0108434	-0.0240964	-0.0361446	0.0746988	-0.280723	-0.220454	-0.493364	-0.291326	0.25224
751	757		759.485	5	4.84-4.88	0.0607229	0.172289	0.212771	0.225301	0.232289		0.0484337	0.181687	0.21494	0.239277	0.236867	751	757	0.0122892	-0.00939759	-0.00216867	-0.0139759	-0.00457831	751	757	0.0053012	0.0139759	0.00626506	0.00554217	0.00385542	0.00578313	0.00987952	0.0101205	0.00722892	0.0180723						0.0614458	-0.046988	-0.0108434	-0.0698795	-0.0228916	2.71318	-0.951031	-0.315579	-2.6575
751	762		1418.79	10	9.49-9.54	0.00638554	0.03	0.0409639	0.0478313	0.083012		0.00204819	0.0336145	0.04	0.0477108	0.0780723	751	762	0.00433735	-0.00361446	0.000963855	0.000120482	0.00493976	751	762	0.00180723	0.00301205	0.0013253	0.00373494	0.00216867	0.00566265	0.00120482	0.00445783	0.00361446	0.00650602						0.0433735	-0.0361446	0.00963855	0.00120482	0.0493976	1.26387	-1.9298	0.358969	0.0401502
751	763		1475.81	11	9.15-9.21	0.00777656	0.0260679	0.0473165	0.0803943	0.136911		0.00481928	0.0322015	0.0474261	0.098138	0.127273	751	763	0.00295728	-0.00613363	-0.000109529	-0.0177437	0.00963855	751	763	0.00470975	0.00240964	0.0104053	0.00536692	0.0124863	0.00197152	0.0102957	0.00514786	0.00591457	0.00230011						0.0325301	-0.0674699	-0.00120482	-0.195181	0.106024	1.00322	-1.00471	-0.0163416	-3.84806
752	763		1362.73	10	8.99-9.07	0.000843373	0.0108434	0.0281928	0.0662651	0.123494		-0.00578313	0.013253	0.0183133	0.0714458	0.110241	752	763	0.00662651	-0.00240964	0.00987952	-0.00518072	0.013253	752	763	0.00120482	0.00819277	0.00168675	0.00409639	0.0139759	0.00168675	0.00542169	0.0104819	0.00542169	0.0060241						0.0662651	-0.0240964	0.0987952	-0.0518072	0.13253	5.53704	-0.424827	1.61177	-1.32053
764	771		960.539	5	5.79-5.85	0.150843	0.274458	0.39494	0.496145	0.704578		0.0925301	0.263373	0.385542	0.560723	0.78241	764	771	0.0583133	0.0110843	0.00939759	-0.0645783	-0.0778313	764	771	0.0125301	0.00674699	0.013494	0.0110843	0.00915663	0.0149398	0.0108434	0.00963855	0.0216867	0.0146988						0.291566	0.0554217	0.046988	-0.322892	-0.389157	5.1799	1.50329	0.981566	-4.59256
780	794		1623.69	13	6.42-6.48	0.111863	0.182576	0.268953	0.320389	0.406024		0.0930491	0.194069	0.273031	0.34569	0.415477	780	794	0.0188137	-0.0114921	-0.00407785	-0.0253012	-0.0094532	780	794	0.0137164	0.0167748	0.00806302	0.00806302	0.00834106	0.00926784	0.0142725	0.0136237	0.00926784	0.0334569						0.244578	-0.149398	-0.053012	-0.328916	-0.122892	1.96849	-0.903746	-0.446155	-3.56738
780	797		2043.85	16	7.14-7.19	0.104744	0.163705	0.23878	0.294955	0.422214		0.0824548	0.166943	0.23637	0.309488	0.423117	780	797	0.0222892	-0.00323795	0.00240964	-0.0145331	-0.000903614	780	797	0.0104669	0.0138554	0.00768072	0.00805723	0.00542169	0.00865964	0.0106928	0.0112952	0.00903614	0.0353916						0.356627	-0.0518072	0.0385542	-0.23253	-0.0144578	2.84187	-0.320444	0.305553	-2.0792
783	794		1252.51	10	6.46-6.50	0.16	0.244458	0.334337	0.373012	0.445904		0.141566	0.262169	0.342289	0.413253	0.444096	783	794	0.0184337	-0.0177108	-0.00795181	-0.040241	0.00180723	783	794	0.0216867	0.0273494	0.0161446	0.0246988	0.00445783	0.0142169	0.0279518	0.016988	0.0086747	0.0416867						0.184337	-0.177108	-0.0795181	-0.40241	0.0180723	1.23126	-0.784431	-0.587687	-2.66253
783	797		1672.67	13	7.40-7.44	0.138462	0.196942	0.274977	0.332067	0.45431		0.106024	0.207507	0.270528	0.332252	0.453012	783	797	0.0324374	-0.0105653	0.00444856	-0.000185357	0.0012975	783	797	0.0131603	0.0159407	0.00518999	0.010658	0.00222428	0.00759963	0.0125116	0.0081557	0.0124189	0.0355885						0.421687	-0.137349	0.0578313	-0.00240964	0.0168675	3.697	-0.903048	0.797053	-0.0196176
808	815		1057.58	6	5.50-5.59	0.0210843	0.0767068	0.140361	0.334739	0.445181		0.0114458	0.087751	0.138956	0.359237	0.451807	808	815	0.00963855	-0.0110442	0.00140562	-0.024498	-0.00662651	808	815	0.0134538	0.00903614	0.013253	0.00502008	0.00702811	0.0060241	0.00823293	0.00823293	0.0104418	0.0160643						0.0578313	-0.0662651	0.00843373	-0.146988	-0.039759	1.13252	-1.56484	0.156044	-3.66238
823	833		1170.6	8	10.85-10.88	0.0254518	0.0563253	0.138404	0.284337	0.5125		0.0186747	0.0850904	0.133283	0.275602	0.499096	823	833	0.00677711	-0.0287651	0.00512048	0.00873494	0.0134036	823	833	0.0179217	0.010994	0.0137048	0.0194277	0.00060241	0.00195783	0.013253	0.0121988	0.0177711	0.0158133						0.0542169	-0.23012	0.0409639	0.0698795	0.107229	0.651104	-2.89339	0.483385	0.574614
823	846		2713.44	20	9.00-9.08	-0.000843373	0.0366265	0.143253	0.31488	0.467169		0.0278916	0.053012	0.166928	0.315783	0.482349	823	846	-0.0287349	-0.0163855	-0.0236747	-0.000903614	-0.0151807	823	846	0.00644578	0.0113855	0.00873494	0.0105422	0.0142169	0.0278313	0.00626506	0.0160843	0.0253614	0.0312048						-0.574699	-0.327711	-0.473494	-0.0180723	-0.303614	-1.74217	-2.18389	-2.24037	-0.0569849
824	846		2582.4	19	8.78-8.84	0.0240964	0.0748256	0.163855	0.262651	0.426379		0.0213063	0.0748256	0.162651	0.273684	0.426696	824	846	0.00279011	0	0.00120482	-0.0110336	-0.000317058	824	846	0.00247305	0.00608751	0.00526316	0.00215599	0.00488269	0.0043754	0.00450222	0.0100824	0.0106531	0.0236525						0.053012	0	0.0228916	-0.209639	-0.0060241	0.961533	0	0.18348	-1.75826
824	848		2851.58	21	9.42-9.48	0.0214573	0.0742972	0.168617	0.266437	0.433333		0.0232932	0.0799771	0.185255	0.304877	0.453528	824	848	-0.00183592	-0.00567986	-0.016638	-0.0384395	-0.0201951	824	848	0.00252438	0.0126793	0.00585198	0.0182444	0.0156627	0.00286862	0.0114171	0.0109007	0.00699943	0.0288009						-0.0385542	-0.119277	-0.349398	-0.807229	-0.424096	-0.832175	-0.576589	-2.32924	-3.40715
826	846		2368.3	17	8.52-8.60	0.0362863	0.0725726	0.167399	0.276045	0.441743		0.0148831	0.0592488	0.145996	0.280298	0.428065	826	846	0.0214033	0.0133239	0.0214033	-0.0042523	0.0136782	826	846	0.00722892	0.0149539	0.0107016	0.0105599	0.00885897	0.00269313	0.0109142	0.00900071	0.0104181	0.0379164						0.363855	0.226506	0.363855	-0.0722892	0.23253	4.80557	1.24655	2.6511	-0.496507
826	848		2637.49	19	9.19-9.26	0.0197844	0.0715916	0.15428	0.253773	0.425808		0.00399493	0.0523779	0.151046	0.266709	0.436969	826	848	0.0157895	0.0192137	0.00323399	-0.012936	-0.0111604	826	848	0.00462904	0.0150919	0.0209258	0.00805327	0.0150919	0.00798985	0.00621433	0.0128091	0.0147749	0.00526316						0.3	0.36506	0.0614458	-0.245783	-0.212048	2.9617	2.039	0.228304	-1.33152
826	850		2865.6	21	9.73-9.84	0.0128514	0.0481928	0.141824	0.251406	0.419334		0.0120482	0.0547332	0.147332	0.258635	0.416638	826	850	0.000803213	-0.00654045	-0.00550775	-0.00722892	0.0026965	826	850	0.000344234	0.00447504	0.00470453	0.00946644	0.00585198	0.0020654	0.00275387	0.00751578	0.0100975	0.0222605						0.0168675	-0.137349	-0.115663	-0.151807	0.0566265	0.664411	-2.15594	-1.07589	-0.90462
847	853		846.408	5	6.93-7.01	0.0621687	0.192289	0.296867	0.388434	0.370843		0.046747	0.189157	0.292048	0.40506	0.407229	847	853	0.0154217	0.00313253	0.00481928	-0.0166265	-0.0363855	847	853	0.0228916	0.026506	0.0122892	0.0127711	0.00457831	0.00457831	0.0190361	0.0226506	0.0192771	0.0207229						0.0771084	0.0156627	0.0240964	-0.0831325	-0.181928	1.1442	0.166262	0.323918	-1.24538
847	854		975.451	6	7.07-7.12	0.0570281	0.153213	0.295984	0.376104	0.371687		0.0329317	0.18012	0.29257	0.375904	0.404418	847	854	0.0240964	-0.0269076	0.00341365	0.000200803	-0.0327309	847	854	0.0136546	0.0253012	0.0204819	0.0313253	0.00943775	0.0180723	0.0136546	0.0178715	0.0136546	0.0220884						0.144578	-0.161446	0.0204819	0.00120482	-0.196386	1.8426	-1.62102	0.217514	0.010178
864	871		916.429	6	10.01-10.06	0.0512048	0.317871	0.546586	0.644378	0.844177		0.0720884	0.369277	0.586145	0.686948	0.832329	864	871	-0.0208835	-0.0514056	-0.0395582	-0.0425703	0.0118474	864	871	0.010241	0.015261	0.0210843	0.0174699	0.0154618	0.00522088	0.0216867	0.015261	0.0204819	0.0413655						-0.125301	-0.308434	-0.237349	-0.255422	0.0710843	-3.1467	-3.35759	-2.63244	-2.73896
866	872		743.397	5	8.76-8.85	0.204096	0.459277	0.641446	0.690361	0.692289		0.151325	0.448916	0.653735	0.717108	0.727229	866	872	0.0527711	0.0103614	-0.0122892	-0.026747	-0.0349398	866	872	0.00578313	0.0168675	0.0163855	0.00915663	0.00722892	0.0108434	0.0224096	0.026506	0.00554217	0.0175904						0.263855	0.0518072	-0.0614458	-0.133735	-0.174699	7.43763	0.639846	-0.683063	-4.32833
872	884		1502.79	11	8.44-8.52	0.4931	0.774918	0.845345	0.86517	0.889814		0.438116	0.779956	0.835926	0.913034	0.901205	872	884	0.0549836	-0.00503834	0.0094195	-0.0478642	-0.011391	872	884	0.0125958	0.0135816	0.0162103	0.02092	0.0194962	0.0100767	0.00799562	0.0167579	0.0119387	0.0221249						0.604819	-0.0554217	0.103614	-0.526506	-0.125301	5.90398	-0.553708	0.699758	-3.44183
872	887		1973.06	14	8.70-8.83	0.154905	0.330207	0.434079	0.486145	0.486403		0.135198	0.335972	0.459122	0.509811	0.493976	872	887	0.0197074	-0.00576592	-0.025043	-0.0236661	-0.00757315	872	887	0.022117	0.0357143	0.013253	0.0105852	0.00499139	0.0246988	0.0114458	0.0116179	0.0158348	0.0372633						0.275904	-0.0807229	-0.350602	-0.331325	-0.106024	1.02956	-0.266291	-2.46113	-2.1521
874	883		1197.65	8	7.22-7.28	0.0396084	0.086747	0.162651	0.295181	0.408735		0.039759	0.0956325	0.17997	0.32756	0.417771	874	883	-0.000150602	-0.00888554	-0.0173193	-0.0323795	-0.00903614	874	883	0.00240964	0.00768072	0.00587349	0.00572289	0.00496988	0.00195783	0.00466867	0.0191265	0.0106928	0.0240964						-0.00120482	-0.0710843	-0.138554	-0.259036	-0.0722892	-0.0840168	-1.71224	-1.49929	-4.62428
[truncated: 7 more columns]

## Sheet: HD Data
Protein	Start	End	Sequence	Modification	Fragment	MaxUptake	Peptide mass	State	Exposure	Center	Center SD	Uptake	Uptake SD	RT
HSBECLIN1_FL	17	31	VCQRCSQPLKLDTSF			12	1723.84	ComplexII_rab5	0			0	0	8.828
HSBECLIN1_FL	17	31	VCQRCSQPLKLDTSF			12	1723.84	ComplexII_rab5	0.3			0.673	0.096	8.822
HSBECLIN1_FL	17	31	VCQRCSQPLKLDTSF			12	1723.84	ComplexII_rab5	3			1.201	0.089	8.8202
HSBECLIN1_FL	17	31	VCQRCSQPLKLDTSF			12	1723.84	ComplexII_rab5	30			1.622	0.073	8.815
HSBECLIN1_FL	17	31	VCQRCSQPLKLDTSF			12	1723.84	ComplexII_rab5	300			1.985	0.033	8.8084
HSBECLIN1_FL	17	31	VCQRCSQPLKLDTSF			12	1723.84	ComplexII_rab5	3000			2.739	0.06	8.8125
HSBECLIN1_FL	17	31	VCQRCSQPLKLDTSF			12	1723.84	ComplexII_solo	0			0	0	8.8498
HSBECLIN1_FL	17	31	VCQRCSQPLKLDTSF			12	1723.84	ComplexII_solo	0.3			0.567	0.045	8.8299
HSBECLIN1_FL	17	31	VCQRCSQPLKLDTSF			12	1723.84	ComplexII_solo	3			1.215	0.064	8.8679
HSBECLIN1_FL	17	31	VCQRCSQPLKLDTSF			12	1723.84	ComplexII_solo	30			1.63	0.09	8.8381
HSBECLIN1_FL	17	31	VCQRCSQPLKLDTSF			12	1723.84	ComplexII_solo	300			2.12	0.072	8.8335
HSBECLIN1_FL	17	31	VCQRCSQPLKLDTSF			12	1723.84	ComplexII_solo	3000			2.747	0.188	8.8163
HSBECLIN1_FL	32	41	KILDRVTIQE			8	1213.7	ComplexII_rab5	0			0	0	7.1802
HSBECLIN1_FL	32	41	KILDRVTIQE			8	1213.7	ComplexII_rab5	0.3			0.679	0.068	7.169
HSBECLIN1_FL	32	41	KILDRVTIQE			8	1213.7	ComplexII_rab5	3			1.766	0.136	7.1761
HSBECLIN1_FL	32	41	KILDRVTIQE			8	1213.7	ComplexII_rab5	30			3.099	0.085	7.1531
HSBECLIN1_FL	32	41	KILDRVTIQE			8	1213.7	ComplexII_rab5	300			4.743	0.091	7.1465
HSBECLIN1_FL	32	41	KILDRVTIQE			8	1213.7	ComplexII_rab5	3000			5.397	0.026	7.1558
HSBECLIN1_FL	32	41	KILDRVTIQE			8	1213.7	ComplexII_solo	0			0	0	7.2072
HSBECLIN1_FL	32	41	KILDRVTIQE			8	1213.7	ComplexII_solo	0.3			0.567	0.054	7.1822
HSBECLIN1_FL	32	41	KILDRVTIQE			8	1213.7	ComplexII_solo	3			1.848	0.084	7.2063
HSBECLIN1_FL	32	41	KILDRVTIQE			8	1213.7	ComplexII_solo	30			3.141	0.12	7.1832
HSBECLIN1_FL	32	41	KILDRVTIQE			8	1213.7	ComplexII_solo	300			4.838	0.066	7.1736
HSBECLIN1_FL	32	41	KILDRVTIQE			8	1213.7	ComplexII_solo	3000			5.409	0.376	7.1598
HSBECLIN1_FL	35	41	DRVTIQE			5	859.44	ComplexII_rab5	0			0	0	5.9707
HSBECLIN1_FL	35	41	DRVTIQE			5	859.44	ComplexII_rab5	0.3			0.189	0.03	5.9597
HSBECLIN1_FL	35	41	DRVTIQE			5	859.44	ComplexII_rab5	3			0.755	0.066	5.9805
HSBECLIN1_FL	35	41	DRVTIQE			5	859.44	ComplexII_rab5	30			1.469	0.066	5.9545
HSBECLIN1_FL	35	41	DRVTIQE			5	859.44	ComplexII_rab5	300			2.947	0.029	5.9585
HSBECLIN1_FL	35	41	DRVTIQE			5	859.44	ComplexII_rab5	3000			3.639	0.016	5.9501
HSBECLIN1_FL	35	41	DRVTIQE			5	859.44	ComplexII_solo	0			0	0	6.004
HSBECLIN1_FL	35	41	DRVTIQE			5	859.44	ComplexII_solo	0.3			0.179	0.031	5.98
HSBECLIN1_FL	35	41	DRVTIQE			5	859.44	ComplexII_solo	3			0.791	0.022	6.0105
HSBECLIN1_FL	35	41	DRVTIQE			5	859.44	ComplexII_solo	30			1.521	0.063	5.9942
HSBECLIN1_FL	35	41	DRVTIQE			5	859.44	ComplexII_solo	300			3.005	0.032	5.9816
HSBECLIN1_FL	35	41	DRVTIQE			5	859.44	ComplexII_solo	3000			3.593	0.267	5.9766
HSBECLIN1_FL	60	72	EETNSGEEPFIET			10	1480.62	ComplexII_rab5	0			0	0	8.9257
HSBECLIN1_FL	60	72	EETNSGEEPFIET			10	1480.62	ComplexII_rab5	0.3			2.121	0.322	8.9089
HSBECLIN1_FL	60	72	EETNSGEEPFIET			10	1480.62	ComplexII_rab5	3			3.354	0.317	8.9197
HSBECLIN1_FL	60	72	EETNSGEEPFIET			10	1480.62	ComplexII_rab5	30			3.726	0.127	8.9194
HSBECLIN1_FL	60	72	EETNSGEEPFIET			10	1480.62	ComplexII_rab5	300			3.957	0.108	8.8888
HSBECLIN1_FL	60	72	EETNSGEEPFIET			10	1480.62	ComplexII_rab5	3000			3.959	0.042	8.9069
HSBECLIN1_FL	60	72	EETNSGEEPFIET			10	1480.62	ComplexII_solo	0			0	0	8.9573
HSBECLIN1_FL	60	72	EETNSGEEPFIET			10	1480.62	ComplexII_solo	0.3			1.779	0.205	8.9427
HSBECLIN1_FL	60	72	EETNSGEEPFIET			10	1480.62	ComplexII_solo	3			3.527	0.308	8.9513
HSBECLIN1_FL	60	72	EETNSGEEPFIET			10	1480.62	ComplexII_solo	30			3.742	0.226	8.9167
HSBECLIN1_FL	60	72	EETNSGEEPFIET			10	1480.62	ComplexII_solo	300			4.238	0.164	8.9068
HSBECLIN1_FL	60	72	EETNSGEEPFIET			10	1480.62	ComplexII_solo	3000			3.955	0.287	8.9085
HSBECLIN1_FL	73	79	PRQDGVS			5	757.372	ComplexII_rab5	0			0	0	4.2157
HSBECLIN1_FL	73	79	PRQDGVS			5	757.372	ComplexII_rab5	0.3			0.897	0.109	4.2023
HSBECLIN1_FL	73	79	PRQDGVS			5	757.372	ComplexII_rab5	3			1.536	0.206	4.1942
HSBECLIN1_FL	73	79	PRQDGVS			5	757.372	ComplexII_rab5	30			2.1	0.079	4.1891
HSBECLIN1_FL	73	79	PRQDGVS			5	757.372	ComplexII_rab5	300			2.366	0.093	4.2002
HSBECLIN1_FL	73	79	PRQDGVS			5	757.372	ComplexII_rab5	3000			2.361	0.045	4.1895
HSBECLIN1_FL	73	79	PRQDGVS			5	757.372	ComplexII_solo	0			0	0	4.2176
HSBECLIN1_FL	73	79	PRQDGVS			5	757.372	ComplexII_solo	0.3			0.758	0.09	4.1959
HSBECLIN1_FL	73	79	PRQDGVS			5	757.372	ComplexII_solo	3			1.61	0.133	4.2123
HSBECLIN1_FL	73	79	PRQDGVS			5	757.372	ComplexII_solo	30			2.092	0.109	4.2204
HSBECLIN1_FL	73	79	PRQDGVS			5	757.372	ComplexII_solo	300			2.55	0.09	4.2157
HSBECLIN1_FL	73	79	PRQDGVS			5	757.372	ComplexII_solo	3000			2.409	0.222	4.1981
HSBECLIN1_FL	73	88	PRQDGVSRRFIPPARM			12	1882.01	ComplexII_rab5	0			0	0	6.7776
HSBECLIN1_FL	73	88	PRQDGVSRRFIPPARM			12	1882.01	ComplexII_rab5	0.3			1.585	0.165	6.7419
HSBECLIN1_FL	73	88	PRQDGVSRRFIPPARM			12	1882.01	ComplexII_rab5	3			2.948	0.243	6.7647
HSBECLIN1_FL	73	88	PRQDGVSRRFIPPARM			12	1882.01	ComplexII_rab5	30			4.332	0.221	6.7415
HSBECLIN1_FL	73	88	PRQDGVSRRFIPPARM			12	1882.01	ComplexII_rab5	300			4.919	0.221	6.7471
HSBECLIN1_FL	73	88	PRQDGVSRRFIPPARM			12	1882.01	ComplexII_rab5	3000			5.67	0.057	6.7475
HSBECLIN1_FL	73	88	PRQDGVSRRFIPPARM			12	1882.01	ComplexII_solo	0			0	0	6.8081
HSBECLIN1_FL	73	88	PRQDGVSRRFIPPARM			12	1882.01	ComplexII_solo	0.3			1.318	0.142	6.7829
HSBECLIN1_FL	73	88	PRQDGVSRRFIPPARM			12	1882.01	ComplexII_solo	3			3.105	0.227	6.8106
HSBECLIN1_FL	73	88	PRQDGVSRRFIPPARM			12	1882.01	ComplexII_solo	30			4.2	0.173	6.7961
HSBECLIN1_FL	73	88	PRQDGVSRRFIPPARM			12	1882.01	ComplexII_solo	300			5.039	0.175	6.7796
HSBECLIN1_FL	73	88	PRQDGVSRRFIPPARM			12	1882.01	ComplexII_solo	3000			5.506	0.429	6.7607
HSBECLIN1_FL	97	112	FTLIGEASDGGTMENL			14	1653.76	ComplexII_rab5	0			0	0	11.2426
HSBECLIN1_FL	97	112	FTLIGEASDGGTMENL			14	1653.76	ComplexII_rab5	0.3			4.845	0.59	11.1601
HSBECLIN1_FL	97	112	FTLIGEASDGGTMENL			14	1653.76	ComplexII_rab5	3			6.212	0.483	11.144
HSBECLIN1_FL	97	112	FTLIGEASDGGTMENL			14	1653.76	ComplexII_rab5	30			6.917	0.192	11.1657
HSBECLIN1_FL	97	112	FTLIGEASDGGTMENL			14	1653.76	ComplexII_rab5	300			7.098	0.223	11.1453
HSBECLIN1_FL	97	112	FTLIGEASDGGTMENL			14	1653.76	ComplexII_rab5	3000			7.125	0.072	11.1579
HSBECLIN1_FL	97	112	FTLIGEASDGGTMENL			14	1653.76	ComplexII_solo	0			0	0	11.216
HSBECLIN1_FL	97	112	FTLIGEASDGGTMENL			14	1653.76	ComplexII_solo	0.3			3.757	0.36	11.1619
HSBECLIN1_FL	97	112	FTLIGEASDGGTMENL			14	1653.76	ComplexII_solo	3			6.166	0.518	11.169
HSBECLIN1_FL	97	112	FTLIGEASDGGTMENL			14	1653.76	ComplexII_solo	30			6.443	0.343	11.1607
HSBECLIN1_FL	97	112	FTLIGEASDGGTMENL			14	1653.76	ComplexII_solo	300			7.076	0.322	11.1297
HSBECLIN1_FL	97	112	FTLIGEASDGGTMENL			14	1653.76	ComplexII_solo	3000			6.865	0.565	11.1316
HSBECLIN1_FL	100	112	IGEASDGGTMENL			11	1292.56	ComplexII_rab5	0			0	0	8.6185
HSBECLIN1_FL	100	112	IGEASDGGTMENL			11	1292.56	ComplexII_rab5	0.3			3.375	0.489	8.6177
HSBECLIN1_FL	100	112	IGEASDGGTMENL			11	1292.56	ComplexII_rab5	3			4.038	0.523	8.6316
HSBECLIN1_FL	100	112	IGEASDGGTMENL			11	1292.56	ComplexII_rab5	30			4.433	0.178	8.5984
HSBECLIN1_FL	100	112	IGEASDGGTMENL			11	1292.56	ComplexII_rab5	300			4.718	0.263	8.5952
HSBECLIN1_FL	100	112	IGEASDGGTMENL			11	1292.56	ComplexII_rab5	3000			4.664	0.077	8.6151
HSBECLIN1_FL	100	112	IGEASDGGTMENL			11	1292.56	ComplexII_solo	0			0	0	8.6349
HSBECLIN1_FL	100	112	IGEASDGGTMENL			11	1292.56	ComplexII_solo	0.3			2.783	0.222	8.6221
HSBECLIN1_FL	100	112	IGEASDGGTMENL			11	1292.56	ComplexII_solo	3			4.184	0.413	8.6409
HSBECLIN1_FL	100	112	IGEASDGGTMENL			11	1292.56	ComplexII_solo	30			4.235	0.358	8.6408
HSBECLIN1_FL	100	112	IGEASDGGTMENL			11	1292.56	ComplexII_solo	300			4.79	0.293	8.6152
HSBECLIN1_FL	100	112	IGEASDGGTMENL			11	1292.56	ComplexII_solo	3000			4.601	0.372	8.5928
HSBECLIN1_FL	113	122	SRRLKVTGDL			8	1143.67	ComplexII_rab5	0			0	0	6.0844
HSBECLIN1_FL	113	122	SRRLKVTGDL			8	1143.67	ComplexII_rab5	0.3			0.897	0.107	6.0515
HSBECLIN1_FL	113	122	SRRLKVTGDL			8	1143.67	ComplexII_rab5	3			2.92	0.221	6.081
HSBECLIN1_FL	113	122	SRRLKVTGDL			8	1143.67	ComplexII_rab5	30			3.829	0.18	6.0543
HSBECLIN1_FL	113	122	SRRLKVTGDL			8	1143.67	ComplexII_rab5	300			4.228	0.083	6.0512
HSBECLIN1_FL	113	122	SRRLKVTGDL			8	1143.67	ComplexII_rab5	3000			4.261	0.024	6.0537
HSBECLIN1_FL	113	122	SRRLKVTGDL			8	1143.67	ComplexII_solo	0			0	0	6.0685
HSBECLIN1_FL	113	122	SRRLKVTGDL			8	1143.67	ComplexII_solo	0.3			0.817	0.089	6.0831
HSBECLIN1_FL	113	122	SRRLKVTGDL			8	1143.67	ComplexII_solo	3			3.056	0.181	6.128
HSBECLIN1_FL	113	122	SRRLKVTGDL			8	1143.67	ComplexII_solo	30			3.9	0.166	6.117
HSBECLIN1_FL	113	122	SRRLKVTGDL			8	1143.67	ComplexII_solo	300			4.432	0.11	6.0987
HSBECLIN1_FL	113	122	SRRLKVTGDL			8	1143.67	ComplexII_solo	3000			4.239	0.44	6.077
HSBECLIN1_FL	119	125	TGDLFDI			5	779.37	ComplexII_rab5	0			0	0	10.6165
HSBECLIN1_FL	119	125	TGDLFDI			5	779.37	ComplexII_rab5	0.3			0.13	0.038	10.5863
HSBECLIN1_FL	119	125	TGDLFDI			5	779.37	ComplexII_rab5	3			0.515	0.056	10.5964
HSBECLIN1_FL	119	125	TGDLFDI			5	779.37	ComplexII_rab5	30			1.295	0.043	10.5883
HSBECLIN1_FL	119	125	TGDLFDI			5	779.37	ComplexII_rab5	300			1.928	0.018	10.5799
HSBECLIN1_FL	119	125	TGDLFDI			5	779.37	ComplexII_rab5	3000			2.195	0.02	10.5876
HSBECLIN1_FL	119	125	TGDLFDI			5	779.37	ComplexII_solo	0			0	0	10.6333
HSBECLIN1_FL	119	125	TGDLFDI			5	779.37	ComplexII_solo	0.3			0.085	0.022	10.5863
HSBECLIN1_FL	119	125	TGDLFDI			5	779.37	ComplexII_solo	3			0.555	0.034	10.6075
HSBECLIN1_FL	119	125	TGDLFDI			5	779.37	ComplexII_solo	30			1.298	0.058	10.6079
HSBECLIN1_FL	119	125	TGDLFDI			5	779.37	ComplexII_solo	300			2.069	0.062	10.575
HSBECLIN1_FL	119	125	TGDLFDI			5	779.37	ComplexII_solo	3000			2.205	0.154	10.57
HSBECLIN1_FL	122	128	LFDIMSG			5	781.368	ComplexII_rab5	0			0	0	8.2517
HSBECLIN1_FL	122	128	LFDIMSG			5	781.368	ComplexII_rab5	0.3			0.017	0.007	8.2265
HSBECLIN1_FL	122	128	LFDIMSG			5	781.368	ComplexII_rab5	3			0.414	0.077	8.2545
HSBECLIN1_FL	122	128	LFDIMSG			5	781.368	ComplexII_rab5	30			0.979	0.033	8.2248
HSBECLIN1_FL	122	128	LFDIMSG			5	781.368	ComplexII_rab5	300			1.474	0.065	8.2477
HSBECLIN1_FL	122	128	LFDIMSG			5	781.368	ComplexII_rab5	3000			1.525	0.051	8.2449
HSBECLIN1_FL	122	128	LFDIMSG			5	781.368	ComplexII_solo	0			0	0	8.3032
HSBECLIN1_FL	122	128	LFDIMSG			5	781.368	ComplexII_solo	0.3			0.041	0.024	8.3235
HSBECLIN1_FL	122	128	LFDIMSG			5	781.368	ComplexII_solo	3			0.427	0.027	8.3423
HSBECLIN1_FL	122	128	LFDIMSG			5	781.368	ComplexII_solo	30			0.792	0.028	8.3264
HSBECLIN1_FL	122	128	LFDIMSG			5	781.368	ComplexII_solo	300			1.355	0.052	8.3219
HSBECLIN1_FL	122	128	LFDIMSG			5	781.368	ComplexII_solo	3000			1.429	0.119	8.2838
HSBECLIN1_FL	123	136	FDIMSGQTDVDHPL			11	1573.71	ComplexII_rab5	0			0	0	9.8489
HSBECLIN1_FL	123	136	FDIMSGQTDVDHPL			11	1573.71	ComplexII_rab5	0.3			0.099	0.044	9.8815
HSBECLIN1_FL	123	136	FDIMSGQTDVDHPL			11	1573.71	ComplexII_rab5	3			0.103	0.06	9.8463
HSBECLIN1_FL	123	136	FDIMSGQTDVDHPL			11	1573.71	ComplexII_rab5	30			0.216	0.085	9.8292
HSBECLIN1_FL	123	136	FDIMSGQTDVDHPL			11	1573.71	ComplexII_rab5	300			1.021	0.165	9.8332
HSBECLIN1_FL	123	136	FDIMSGQTDVDHPL			11	1573.71	ComplexII_rab5	3000			2.223	0.216	9.8285
HSBECLIN1_FL	123	136	FDIMSGQTDVDHPL			11	1573.71	ComplexII_solo	0			0	0	9.8791
HSBECLIN1_FL	123	136	FDIMSGQTDVDHPL			11	1573.71	ComplexII_solo	0.3			0.109	0.16	9.8201
HSBECLIN1_FL	123	136	FDIMSGQTDVDHPL			11	1573.71	ComplexII_solo	3			0.081	0.048	9.8573
HSBECLIN1_FL	123	136	FDIMSGQTDVDHPL			11	1573.71	ComplexII_solo	30			0.328	0.045	9.8419
HSBECLIN1_FL	123	136	FDIMSGQTDVDHPL			11	1573.71	ComplexII_solo	300			1.189	0.164	9.8247
HSBECLIN1_FL	123	136	FDIMSGQTDVDHPL			11	1573.71	ComplexII_solo	3000			2.397	0.267	9.8093
HSBECLIN1_FL	123	137	FDIMSGQTDVDHPLC			12	1676.72	ComplexII_rab5	0			0	0	10.0359
HSBECLIN1_FL	123	137	FDIMSGQTDVDHPLC			12	1676.72	ComplexII_rab5	0.3			0.087	0.026	10.0078
HSBECLIN1_FL	123	137	FDIMSGQTDVDHPLC			12	1676.72	ComplexII_rab5	3			0.211	0.018	10.0556
HSBECLIN1_FL	123	137	FDIMSGQTDVDHPLC			12	1676.72	ComplexII_rab5	30			0.368	0.017	10.0198
HSBECLIN1_FL	123	137	FDIMSGQTDVDHPLC			12	1676.72	ComplexII_rab5	300			1.266	0.31	10.0377
HSBECLIN1_FL	123	137	FDIMSGQTDVDHPLC			12	1676.72	ComplexII_rab5	3000			2.353	0.036	10.0226
HSBECLIN1_FL	123	137	FDIMSGQTDVDHPLC			12	1676.72	ComplexII_solo	0			0	0	10.0329
HSBECLIN1_FL	123	137	FDIMSGQTDVDHPLC			12	1676.72	ComplexII_solo	0.3			0.098	0.024	10.0044
HSBECLIN1_FL	123	137	FDIMSGQTDVDHPLC			12	1676.72	ComplexII_solo	3			0.21	0.012	10.0575
HSBECLIN1_FL	123	137	FDIMSGQTDVDHPLC			12	1676.72	ComplexII_solo	30			0.442	0.098	10.0115
HSBECLIN1_FL	123	137	FDIMSGQTDVDHPLC			12	1676.72	ComplexII_solo	300			1.172	0.123	10.0035
HSBECLIN1_FL	123	137	FDIMSGQTDVDHPLC			12	1676.72	ComplexII_solo	3000			2.481	0.331	10.0295
HSBECLIN1_FL	123	139	FDIMSGQTDVDHPLCEE			14	1934.8	ComplexII_rab5	0			0	0	9.8838
HSBECLIN1_FL	123	139	FDIMSGQTDVDHPLCEE			14	1934.8	ComplexII_rab5	0.3			0.076	0.024	9.8483
HSBECLIN1_FL	123	139	FDIMSGQTDVDHPLCEE			14	1934.8	ComplexII_rab5	3			0.255	0.065	9.8743
HSBECLIN1_FL	123	139	FDIMSGQTDVDHPLCEE			14	1934.8	ComplexII_rab5	30			0.612	0.056	9.907
HSBECLIN1_FL	123	139	FDIMSGQTDVDHPLCEE			14	1934.8	ComplexII_rab5	300			1.45	0.076	9.8472
HSBECLIN1_FL	123	139	FDIMSGQTDVDHPLCEE			14	1934.8	ComplexII_rab5	3000			2.878	0.054	9.8617
HSBECLIN1_FL	123	139	FDIMSGQTDVDHPLCEE			14	1934.8	ComplexII_solo	0			0	0	9.9074
HSBECLIN1_FL	123	139	FDIMSGQTDVDHPLCEE			14	1934.8	ComplexII_solo	0.3			0.076	0.024	9.8687
HSBECLIN1_FL	123	139	FDIMSGQTDVDHPLCEE			14	1934.8	ComplexII_solo	3			0.281	0.015	9.9023
HSBECLIN1_FL	123	139	FDIMSGQTDVDHPLCEE			14	1934.8	ComplexII_solo	30			0.625	0.031	9.8647
HSBECLIN1_FL	123	139	FDIMSGQTDVDHPLCEE			14	1934.8	ComplexII_solo	300			1.539	0.069	9.8697
HSBECLIN1_FL	123	139	FDIMSGQTDVDHPLCEE			14	1934.8	ComplexII_solo	3000			2.932	0.26	9.846
HSBECLIN1_FL	124	139	DIMSGQTDVDHPLCEE			13	1787.73	ComplexII_rab5	0			0	0	8.7774
HSBECLIN1_FL	124	139	DIMSGQTDVDHPLCEE			13	1787.73	ComplexII_rab5	0.3			0.09	0.063	8.719
HSBECLIN1_FL	124	139	DIMSGQTDVDHPLCEE			13	1787.73	ComplexII_rab5	3			0.311	0.067	8.7503
HSBECLIN1_FL	124	139	DIMSGQTDVDHPLCEE			13	1787.73	ComplexII_rab5	30			0.691	0.075	8.7417
HSBECLIN1_FL	124	139	DIMSGQTDVDHPLCEE			13	1787.73	ComplexII_rab5	300			1.515	0.091	8.7385
HSBECLIN1_FL	124	139	DIMSGQTDVDHPLCEE			13	1787.73	ComplexII_rab5	3000			2.933	0.079	8.7357
HSBECLIN1_FL	124	139	DIMSGQTDVDHPLCEE			13	1787.73	ComplexII_solo	0			0	0	8.7869
HSBECLIN1_FL	124	139	DIMSGQTDVDHPLCEE			13	1787.73	ComplexII_solo	0.3			0.174	0.033	8.7636
HSBECLIN1_FL	124	139	DIMSGQTDVDHPLCEE			13	1787.73	ComplexII_solo	3			0.373	0.052	8.7892
HSBECLIN1_FL	124	139	DIMSGQTDVDHPLCEE			13	1787.73	ComplexII_solo	30			0.794	0.103	8.7647
HSBECLIN1_FL	124	139	DIMSGQTDVDHPLCEE			13	1787.73	ComplexII_solo	300			1.738	0.064	8.7496
HSBECLIN1_FL	124	139	DIMSGQTDVDHPLCEE			13	1787.73	ComplexII_solo	3000			3.029	0.276	8.7394
HSBECLIN1_FL	127	138	SGQTDVDHPLCE			9	1299.54	ComplexII_rab5	0			0	0	6.9671
HSBECLIN1_FL	127	138	SGQTDVDHPLCE			9	1299.54	ComplexII_rab5	0.3			0.014	0.1	6.9496
HSBECLIN1_FL	127	138	SGQTDVDHPLCE			9	1299.54	ComplexII_rab5	3			0.184	0.017	6.9699
HSBECLIN1_FL	127	138	SGQTDVDHPLCE			9	1299.54	ComplexII_rab5	30			0.361	0.105	6.9477
HSBECLIN1_FL	127	138	SGQTDVDHPLCE			9	1299.54	ComplexII_rab5	300			0.986	0.117	6.9533
HSBECLIN1_FL	127	138	SGQTDVDHPLCE			9	1299.54	ComplexII_rab5	3000			2.057	0.072	6.9504
HSBECLIN1_FL	127	138	SGQTDVDHPLCE			9	1299.54	ComplexII_solo	0			0	0	7.0181
HSBECLIN1_FL	127	138	SGQTDVDHPLCE			9	1299.54	ComplexII_solo	0.3			0.195	0.082	7.0018
HSBECLIN1_FL	127	138	SGQTDVDHPLCE			9	1299.54	ComplexII_solo	3			0.242	0.037	7.0221
HSBECLIN1_FL	127	138	SGQTDVDHPLCE			9	1299.54	ComplexII_solo	30			0.407	0.077	7.0114
HSBECLIN1_FL	127	138	SGQTDVDHPLCE			9	1299.54	ComplexII_solo	300			1.293	0.105	6.9936
HSBECLIN1_FL	127	138	SGQTDVDHPLCE			9	1299.54	ComplexII_solo	3000			2.206	0.257	6.9806
HSBECLIN1_FL	127	139	SGQTDVDHPLCEE			10	1428.58	ComplexII_rab5	0			0	0	7.1418
HSBECLIN1_FL	127	139	SGQTDVDHPLCEE			10	1428.58	ComplexII_rab5	0.3			0.074	0.088	7.1637
HSBECLIN1_FL	127	139	SGQTDVDHPLCEE			10	1428.58	ComplexII_rab5	3			0.227	0.082	7.1394
HSBECLIN1_FL	127	139	SGQTDVDHPLCEE			10	1428.58	ComplexII_rab5	30			0.611	0.11	7.1199
HSBECLIN1_FL	127	139	SGQTDVDHPLCEE			10	1428.58	ComplexII_rab5	300			1.424	0.044	7.1343
HSBECLIN1_FL	127	139	SGQTDVDHPLCEE			10	1428.58	ComplexII_rab5	3000			2.309	0.083	7.1174
HSBECLIN1_FL	127	139	SGQTDVDHPLCEE			10	1428.58	ComplexII_solo	0			0	0	7.1601
HSBECLIN1_FL	127	139	SGQTDVDHPLCEE			10	1428.58	ComplexII_solo	0.3			0.016	0.066	7.1333
HSBECLIN1_FL	127	139	SGQTDVDHPLCEE			10	1428.58	ComplexII_solo	3			0.289	0.04	7.1627
HSBECLIN1_FL	127	139	SGQTDVDHPLCEE			10	1428.58	ComplexII_solo	30			0.738	0.066	7.1483
HSBECLIN1_FL	127	139	SGQTDVDHPLCEE			10	1428.58	ComplexII_solo	300			1.489	0.08	7.137
HSBECLIN1_FL	127	139	SGQTDVDHPLCEE			10	1428.58	ComplexII_solo	3000			2.534	0.184	7.1214
HSBECLIN1_FL	133	146	DHPLCEECTDTLLD			11	1602.65	ComplexII_rab5	0			0	0	9.5975
HSBECLIN1_FL	133	146	DHPLCEECTDTLLD			11	1602.65	ComplexII_rab5	0.3			0.796	0.109	9.5565
HSBECLIN1_FL	133	146	DHPLCEECTDTLLD			11	1602.65	ComplexII_rab5	3			1.386	0.179	9.5653
HSBECLIN1_FL	133	146	DHPLCEECTDTLLD			11	1602.65	ComplexII_rab5	30			1.797	0.079	9.5583
HSBECLIN1_FL	133	146	DHPLCEECTDTLLD			11	1602.65	ComplexII_rab5	300			2.522	0.045	9.5413
HSBECLIN1_FL	133	146	DHPLCEECTDTLLD			11	1602.65	ComplexII_rab5	3000			3.5	0.044	9.5542
HSBECLIN1_FL	133	146	DHPLCEECTDTLLD			11	1602.65	ComplexII_solo	0			0	0	9.6419
HSBECLIN1_FL	133	146	DHPLCEECTDTLLD			11	1602.65	ComplexII_solo	0.3			0.657	0.085	9.5684
HSBECLIN1_FL	133	146	DHPLCEECTDTLLD			11	1602.65	ComplexII_solo	3			1.439	0.117	9.6094
HSBECLIN1_FL	133	146	DHPLCEECTDTLLD			11	1602.65	ComplexII_solo	30			1.74	0.087	9.5835
HSBECLIN1_FL	133	146	DHPLCEECTDTLLD			11	1602.65	ComplexII_solo	300			2.695	0.092	9.5749
HSBECLIN1_FL	133	146	DHPLCEECTDTLLD			11	1602.65	ComplexII_solo	3000			3.503	0.27	9.5421
HSBECLIN1_FL	139	145	ECTDTLL			5	793.353	ComplexII_rab5	0			0	0	9.4124
HSBECLIN1_FL	139	145	ECTDTLL			5	793.353	ComplexII_rab5	0.3			0.059	0.027	9.415
HSBECLIN1_FL	139	145	ECTDTLL			5	793.353	ComplexII_rab5	3			0.023	0.01	9.4238
HSBECLIN1_FL	139	145	ECTDTLL			5	793.353	ComplexII_rab5	30			0.13	0.022	9.4047
HSBECLIN1_FL	139	145	ECTDTLL			5	793.353	ComplexII_rab5	300			0.511	0.022	9.4033
HSBECLIN1_FL	139	145	ECTDTLL			5	793.353	ComplexII_rab5	3000			0.671	0.034	9.397
HSBECLIN1_FL	139	145	ECTDTLL			5	793.353	ComplexII_solo	0			0	0	9.4533
HSBECLIN1_FL	139	145	ECTDTLL			5	793.353	ComplexII_solo	0.3			0.012	0.011	9.4338
HSBECLIN1_FL	139	145	ECTDTLL			5	793.353	ComplexII_solo	3			0.01	0.008	9.4802
HSBECLIN1_FL	139	145	ECTDTLL			5	793.353	ComplexII_solo	30			0.089	0.008	9.4402
HSBECLIN1_FL	139	145	ECTDTLL			5	793.353	ComplexII_solo	300			0.551	0.039	9.444
HSBECLIN1_FL	139	145	ECTDTLL			5	793.353	ComplexII_solo	3000			0.656	0.067	9.4112
HSBECLIN1_FL	146	152	DQLDTQL			5	831.397	ComplexII_rab5	0			0	0	8.3652
HSBECLIN1_FL	146	152	DQLDTQL			5	831.397	ComplexII_rab5	0.3			0.043	0.013	8.3592
HSBECLIN1_FL	146	152	DQLDTQL			5	831.397	ComplexII_rab5	3			0.022	0.033	8.368
HSBECLIN1_FL	146	152	DQLDTQL			5	831.397	ComplexII_rab5	30			0.143	0.037	8.361
HSBECLIN1_FL	146	152	DQLDTQL			5	831.397	ComplexII_rab5	300			0.782	0.067	8.363
HSBECLIN1_FL	146	152	DQLDTQL			5	831.397	ComplexII_rab5	3000			1.828	0.084	8.3549
HSBECLIN1_FL	146	152	DQLDTQL			5	831.397	ComplexII_solo	0			0	0	8.3992
HSBECLIN1_FL	146	152	DQLDTQL			5	831.397	ComplexII_solo	0.3			0.086	0.016	8.3933
HSBECLIN1_FL	146	152	DQLDTQL			5	831.397	ComplexII_solo	3			0.181	0.041	8.4017
HSBECLIN1_FL	146	152	DQLDTQL			5	831.397	ComplexII_solo	30			0.308	0.066	8.4155
HSBECLIN1_FL	146	152	DQLDTQL			5	831.397	ComplexII_solo	300			1.05	0.036	8.3865
HSBECLIN1_FL	146	152	DQLDTQL			5	831.397	ComplexII_solo	3000			2.068	0.125	8.3745
HSBECLIN1_FL	149	157	DTQLNVTEN			7	1032.47	ComplexII_rab5	0			0	0	7.739
HSBECLIN1_FL	149	157	DTQLNVTEN			7	1032.47	ComplexII_rab5	0.3			1.386	0.08	7.7278
HSBECLIN1_FL	149	157	DTQLNVTEN			7	1032.47	ComplexII_rab5	3			2.629	0.2	7.7505
HSBECLIN1_FL	149	157	DTQLNVTEN			7	1032.47	ComplexII_rab5	30			2.905	0.107	7.7206
HSBECLIN1_FL	149	157	DTQLNVTEN			7	1032.47	ComplexII_rab5	300			3.095	0.094	7.7174
HSBECLIN1_FL	149	157	DTQLNVTEN			7	1032.47	ComplexII_rab5	3000			2.93	0.076	7.7215
HSBECLIN1_FL	149	157	DTQLNVTEN			7	1032.47	ComplexII_solo	0			0	0	7.8638
HSBECLIN1_FL	149	157	DTQLNVTEN			7	1032.47	ComplexII_solo	0.3			1.057	0.199	7.8387
HSBECLIN1_FL	149	157	DTQLNVTEN			7	1032.47	ComplexII_solo	3			2.645	0.108	7.8488
HSBECLIN1_FL	149	157	DTQLNVTEN			7	1032.47	ComplexII_solo	30			2.73	0.143	7.777
HSBECLIN1_FL	149	157	DTQLNVTEN			7	1032.47	ComplexII_solo	300			3.047	0.111	7.7725
HSBECLIN1_FL	149	157	DTQLNVTEN			7	1032.47	ComplexII_solo	3000			2.877	0.258	7.7517
HSBECLIN1_FL	153	161	NVTENECQN			7	1049.41	ComplexII_rab5	0			0	0	5.0968
HSBECLIN1_FL	153	161	NVTENECQN			7	1049.41	ComplexII_rab5	0.3			0.05	0.005	5.1009
HSBECLIN1_FL	153	161	NVTENECQN			7	1049.41	ComplexII_rab5	3			0.178	0.037	5.1066
HSBECLIN1_FL	153	161	NVTENECQN			7	1049.41	ComplexII_rab5	30			0.833	0.038	5.1023
HSBECLIN1_FL	153	161	NVTENECQN			7	1049.41	ComplexII_rab5	300			2.719	0.029	5.098
HSBECLIN1_FL	153	161	NVTENECQN			7	1049.41	ComplexII_rab5	3000			4.639	0.027	5.0894
HSBECLIN1_FL	153	161	NVTENECQN			7	1049.41	ComplexII_solo	0			0	0	5.0994
HSBECLIN1_FL	153	161	NVTENECQN			7	1049.41	ComplexII_solo	0.3			0.022	0.011	5.1136
HSBECLIN1_FL	153	161	NVTENECQN			7	1049.41	ComplexII_solo	3			0.217	0.022	5.1335
HSBECLIN1_FL	153	161	NVTENECQN			7	1049.41	ComplexII_solo	30			1.124	0.053	5.1315
HSBECLIN1_FL	153	161	NVTENECQN			7	1049.41	ComplexII_solo	300			3.406	0.037	5.099
HSBECLIN1_FL	153	161	NVTENECQN			7	1049.41	ComplexII_solo	3000			5	0.039	5.0799
HSBECLIN1_FL	162	169	YKRCLEIL			6	1036.57	ComplexII_rab5	0			0	0	8.8088
HSBECLIN1_FL	162	169	YKRCLEIL			6	1036.57	ComplexII_rab5	0.3			0.119	0.063	8.7853
HSBECLIN1_FL	162	169	YKRCLEIL			6	1036.57	ComplexII_rab5	3			0.049	0.038	8.8045
HSBECLIN1_FL	162	169	YKRCLEIL			6	1036.57	ComplexII_rab5	30			0.126	0.14	8.808
HSBECLIN1_FL	162	169	YKRCLEIL			6	1036.57	ComplexII_rab5	300			0.42	0.041	8.7875
HSBECLIN1_FL	162	169	YKRCLEIL			6	1036.57	ComplexII_rab5	3000			1.957	0.091	8.7741
HSBECLIN1_FL	162	169	YKRCLEIL			6	1036.57	ComplexII_solo	0			0	0	8.8446
HSBECLIN1_FL	162	169	YKRCLEIL			6	1036.57	ComplexII_solo	0.3			0.024	0.026	8.8177
HSBECLIN1_FL	162	169	YKRCLEIL			6	1036.57	ComplexII_solo	3			0.114	0.087	8.8291
HSBECLIN1_FL	162	169	YKRCLEIL			6	1036.57	ComplexII_solo	30			0.057	0.041	8.8468
HSBECLIN1_FL	162	169	YKRCLEIL			6	1036.57	ComplexII_solo	300			0.65	0.061	8.8335
HSBECLIN1_FL	162	169	YKRCLEIL			6	1036.57	ComplexII_solo	3000			2.165	0.13	8.7988
HSBECLIN1_FL	173	180	NEDDSEQL			6	948.367	ComplexII_rab5	0			0	0	6.8404
HSBECLIN1_FL	173	180	NEDDSEQL			6	948.367	ComplexII_rab5	0.3			1.303	0.19	6.8396
HSBECLIN1_FL	173	180	NEDDSEQL			6	948.367	ComplexII_rab5	3			2.273	0.083	6.8258
HSBECLIN1_FL	173	180	NEDDSEQL			6	948.367	ComplexII_rab5	30			2.932	0.023	6.8219
HSBECLIN1_FL	173	180	NEDDSEQL			6	948.367	ComplexII_rab5	300			3.206	0.048	6.8205
HSBECLIN1_FL	173	180	NEDDSEQL			6	948.367	ComplexII_rab5	3000			3.079	0.064	6.8262
HSBECLIN1_FL	173	180	NEDDSEQL			6	948.367	ComplexII_solo	0			0	0	6.8587
HSBECLIN1_FL	173	180	NEDDSEQL			6	948.367	ComplexII_solo	0.3			1.024	0.091	6.8318
HSBECLIN1_FL	173	180	NEDDSEQL			6	948.367	ComplexII_solo	3			2.254	0.122	6.8473
HSBECLIN1_FL	173	180	NEDDSEQL			6	948.367	ComplexII_solo	30			3.022	0.132	6.8415
HSBECLIN1_FL	173	180	NEDDSEQL			6	948.367	ComplexII_solo	300			3.304	0.026	6.8407
HSBECLIN1_FL	173	180	NEDDSEQL			6	948.367	ComplexII_solo	3000			3.146	0.145	6.8305
HSBECLIN1_FL	181	187	QMELKEL			5	889.458	ComplexII_rab5	0			0	0	6.2397
HSBECLIN1_FL	181	187	QMELKEL			5	889.458	ComplexII_rab5	0.3			0.034	0.021	6.2144
HSBECLIN1_FL	181	187	QMELKEL			5	889.458	ComplexII_rab5	3			0.045	0.009	6.2287
HSBECLIN1_FL	181	187	QMELKEL			5	889.458	ComplexII_rab5	30			0.057	0.005	6.2176
HSBECLIN1_FL	181	187	QMELKEL			5	889.458	ComplexII_rab5	300			0.052	0.019	6.2129
HSBECLIN1_FL	181	187	QMELKEL			5	889.458	ComplexII_rab5	3000			0.055	0.018	6.2184
HSBECLIN1_FL	181	187	QMELKEL			5	889.458	ComplexII_solo	0			0	0	6.2577
HSBECLIN1_FL	181	187	QMELKEL			5	889.458	ComplexII_solo	0.3			0.028	0.009	6.2416
HSBECLIN1_FL	181	187	QMELKEL			5	889.458	ComplexII_solo	3			0.036	0.023	6.2764
HSBECLIN1_FL	181	187	QMELKEL			5	889.458	ComplexII_solo	30			0.05	0.029	6.2619
HSBECLIN1_FL	181	187	QMELKEL			5	889.458	ComplexII_solo	300			0.041	0.012	6.2454
HSBECLIN1_FL	181	187	QMELKEL			5	889.458	ComplexII_solo	3000			0.052	0.005	6.2299
HSBECLIN1_FL	185	202	KELALEEERLIQELEDVE			16	2184.12	ComplexII_rab5	0			0	0	10.4419
HSBECLIN1_FL	185	202	KELALEEERLIQELEDVE			16	2184.12	ComplexII_rab5	0.3			1.867	0.298	10.3943
HSBECLIN1_FL	185	202	KELALEEERLIQELEDVE			16	2184.12	ComplexII_rab5	3			2.693	0.209	10.4201
HSBECLIN1_FL	185	202	KELALEEERLIQELEDVE			16	2184.12	ComplexII_rab5	30			3.064	0.058	10.4101
HSBECLIN1_FL	185	202	KELALEEERLIQELEDVE			16	2184.12	ComplexII_rab5	300			3.762	0.166	10.3965
HSBECLIN1_FL	185	202	KELALEEERLIQELEDVE			16	2184.12	ComplexII_rab5	3000			3.94	0.083	10.3955
HSBECLIN1_FL	185	202	KELALEEERLIQELEDVE			16	2184.12	ComplexII_solo	0			0	0	10.4586
HSBECLIN1_FL	185	202	KELALEEERLIQELEDVE			16	2184.12	ComplexII_solo	0.3			1.374	0.146	10.396
HSBECLIN1_FL	185	202	KELALEEERLIQELEDVE			16	2184.12	ComplexII_solo	3			2.828	0.382	10.4329
HSBECLIN1_FL	185	202	KELALEEERLIQELEDVE			16	2184.12	ComplexII_solo	30			3.103	0.189	10.4123
HSBECLIN1_FL	185	202	KELALEEERLIQELEDVE			16	2184.12	ComplexII_solo	300			4.065	0.151	10.4126
HSBECLIN1_FL	185	202	KELALEEERLIQELEDVE			16	2184.12	ComplexII_solo	3000			4.218	0.338	10.3884
HSBECLIN1_FL	187	198	LALEEERLIQEL			10	1454.8	ComplexII_rab5	0			0	0	8.3932
HSBECLIN1_FL	187	198	LALEEERLIQEL			10	1454.8	ComplexII_rab5	0.3			0.481	0.047	8.3609
HSBECLIN1_FL	187	198	LALEEERLIQEL			10	1454.8	ComplexII_rab5	3			1.249	0.115	8.3837
HSBECLIN1_FL	187	198	LALEEERLIQEL			10	1454.8	ComplexII_rab5	30			1.783	0.028	8.3732
HSBECLIN1_FL	187	198	LALEEERLIQEL			10	1454.8	ComplexII_rab5	300			3.054	0.026	8.3857
HSBECLIN1_FL	187	198	LALEEERLIQEL			10	1454.8	ComplexII_rab5	3000			4.903	0.026	8.341
HSBECLIN1_FL	187	198	LALEEERLIQEL			10	1454.8	ComplexII_solo	0			0	0	8.4376
HSBECLIN1_FL	187	198	LALEEERLIQEL			10	1454.8	ComplexII_solo	0.3			0.445	0.075	8.5156
HSBECLIN1_FL	187	198	LALEEERLIQEL			10	1454.8	ComplexII_solo	3			1.324	0.071	8.4244
HSBECLIN1_FL	187	198	LALEEERLIQEL			10	1454.8	ComplexII_solo	30			1.888	0.068	8.412
HSBECLIN1_FL	187	198	LALEEERLIQEL			10	1454.8	ComplexII_solo	300			3.277	0.013	8.3987
HSBECLIN1_FL	187	198	LALEEERLIQEL			10	1454.8	ComplexII_solo	3000			5.131	0.135	8.399
HSBECLIN1_FL	195	212	IQELEDVEKNRKIVAENL			16	2139.15	ComplexII_rab5	0			0	0	8.4718
HSBECLIN1_FL	195	212	IQELEDVEKNRKIVAENL			16	2139.15	ComplexII_rab5	0.3			0.321	0.138	8.4063
HSBECLIN1_FL	195	212	IQELEDVEKNRKIVAENL			16	2139.15	ComplexII_rab5	3			0.291	0.143	8.4256
HSBECLIN1_FL	195	212	IQELEDVEKNRKIVAENL			16	2139.15	ComplexII_rab5	30			0.188	0.214	8.4186
HSBECLIN1_FL	195	212	IQELEDVEKNRKIVAENL			16	2139.15	ComplexII_rab5	300			0.566	0.083	8.4101
HSBECLIN1_FL	195	212	IQELEDVEKNRKIVAENL			16	2139.15	ComplexII_rab5	3000			1.285	0.126	8.43
HSBECLIN1_FL	195	212	IQELEDVEKNRKIVAENL			16	2139.15	ComplexII_solo	0			0	0	8.469
HSBECLIN1_FL	195	212	IQELEDVEKNRKIVAENL			16	2139.15	ComplexII_solo	0.3			0.279	0.042	8.4562
HSBECLIN1_FL	195	212	IQELEDVEKNRKIVAENL			16	2139.15	ComplexII_solo	3			0.023	0.017	8.4837
HSBECLIN1_FL	195	212	IQELEDVEKNRKIVAENL			16	2139.15	ComplexII_solo	30			0.13	0.106	8.4697
HSBECLIN1_FL	195	212	IQELEDVEKNRKIVAENL			16	2139.15	ComplexII_solo	300			0.468	0.099	8.4598
HSBECLIN1_FL	195	212	IQELEDVEKNRKIVAENL			16	2139.15	ComplexII_solo	3000			1.195	0.037	8.4025
HSBECLIN1_FL	199	212	EDVEKNRKIVAENL			12	1655.88	ComplexII_rab5	0			0	0	6.6693
HSBECLIN1_FL	199	212	EDVEKNRKIVAENL			12	1655.88	ComplexII_rab5	0.3			0.337	0.052	6.7226
HSBECLIN1_FL	199	212	EDVEKNRKIVAENL			12	1655.88	ComplexII_rab5	3			0.249	0.128	6.7123
HSBECLIN1_FL	199	212	EDVEKNRKIVAENL			12	1655.88	ComplexII_rab5	30			0.151	0.217	6.6803
HSBECLIN1_FL	199	212	EDVEKNRKIVAENL			12	1655.88	ComplexII_rab5	300			0.341	0.02	6.6633
HSBECLIN1_FL	199	212	EDVEKNRKIVAENL			12	1655.88	ComplexII_rab5	3000			1.194	0.074	6.6706
HSBECLIN1_FL	199	212	EDVEKNRKIVAENL			12	1655.88	ComplexII_solo	0			0	0	6.705
HSBECLIN1_FL	199	212	EDVEKNRKIVAENL			12	1655.88	ComplexII_solo	0.3			0.082	0.072	6.6834
HSBECLIN1_FL	199	212	EDVEKNRKIVAENL			12	1655.88	ComplexII_solo	3			0.231	0.043	6.7007
HSBECLIN1_FL	199	212	EDVEKNRKIVAENL			12	1655.88	ComplexII_solo	30			0.208	0.023	6.7001
HSBECLIN1_FL	199	212	EDVEKNRKIVAENL			12	1655.88	ComplexII_solo	300			0.354	0.018	6.6783
HSBECLIN1_FL	199	212	EDVEKNRKIVAENL			12	1655.88	ComplexII_solo	3000			1.347	0.053	6.6768
HSBECLIN1_FL	201	212	VEKNRKIVAENL			10	1411.81	ComplexII_rab5	0			0	0	6.0227
HSBECLIN1_FL	201	212	VEKNRKIVAENL			10	1411.81	ComplexII_rab5	0.3			-0.008	0.019	5.9956
HSBECLIN1_FL	201	212	VEKNRKIVAENL			10	1411.81	ComplexII_rab5	3			0.006	0.026	6.0343
HSBECLIN1_FL	201	212	VEKNRKIVAENL			10	1411.81	ComplexII_rab5	30			0.04	0.015	6.0075
HSBECLIN1_FL	201	212	VEKNRKIVAENL			10	1411.81	ComplexII_rab5	300			0.146	0.002	6.0115
HSBECLIN1_FL	201	212	VEKNRKIVAENL			10	1411.81	ComplexII_rab5	3000			0.922	0.015	5.9943
HSBECLIN1_FL	201	212	VEKNRKIVAENL			10	1411.81	ComplexII_solo	0			0	0	6.0512
HSBECLIN1_FL	201	212	VEKNRKIVAENL			10	1411.81	ComplexII_solo	0.3			-0.031	0.021	6.0368
HSBECLIN1_FL	201	212	VEKNRKIVAENL			10	1411.81	ComplexII_solo	3			-0.002	0.016	6.0555
HSBECLIN1_FL	201	212	VEKNRKIVAENL			10	1411.81	ComplexII_solo	30			0.022	0.039	6.0427
HSBECLIN1_FL	201	212	VEKNRKIVAENL			10	1411.81	ComplexII_solo	300			0.14	0.012	6.0545
HSBECLIN1_FL	201	212	VEKNRKIVAENL			10	1411.81	ComplexII_solo	3000			0.999	0.093	6.0355
HSBECLIN1_FL	213	219	EKVQAEA			5	773.392	ComplexII_rab5	0			0	0	4.5736
HSBECLIN1_FL	213	219	EKVQAEA			5	773.392	ComplexII_rab5	0.3			0.045	0.035	4.5778
HSBECLIN1_FL	213	219	EKVQAEA			5	773.392	ComplexII_rab5	3			-0.03	0.026	4.5818
HSBECLIN1_FL	213	219	EKVQAEA			5	773.392	ComplexII_rab5	30			0.047	0.021	4.5734
HSBECLIN1_FL	213	219	EKVQAEA			5	773.392	ComplexII_rab5	300			0.388	0.056	4.5793
HSBECLIN1_FL	213	219	EKVQAEA			5	773.392	ComplexII_rab5	3000			1.379	0.013	4.5617
HSBECLIN1_FL	213	219	EKVQAEA			5	773.392	ComplexII_solo	0			0	0	4.5741
HSBECLIN1_FL	213	219	EKVQAEA			5	773.392	ComplexII_solo	0.3			-0.002	0.022	4.58
HSBECLIN1_FL	213	219	EKVQAEA			5	773.392	ComplexII_solo	3			0.004	0.022	4.5929
HSBECLIN1_FL	213	219	EKVQAEA			5	773.392	ComplexII_solo	30			0.034	0.039	4.5958
HSBECLIN1_FL	213	219	EKVQAEA			5	773.392	ComplexII_solo	300			0.418	0.071	4.5841
HSBECLIN1_FL	213	219	EKVQAEA			5	773.392	ComplexII_solo	3000			1.443	0.07	4.5791
HSBECLIN1_FL	213	222	EKVQAEAERL			8	1171.62	ComplexII_rab5	0			0	0	6.3061
HSBECLIN1_FL	213	222	EKVQAEAERL			8	1171.62	ComplexII_rab5	0.3			-0.002	0.104	6.3017
HSBECLIN1_FL	213	222	EKVQAEAERL			8	1171.62	ComplexII_rab5	3			-0.053	0.013	6.3159
HSBECLIN1_FL	213	222	EKVQAEAERL			8	1171.62	ComplexII_rab5	30			0.094	0.057	6.2962
HSBECLIN1_FL	213	222	EKVQAEAERL			8	1171.62	ComplexII_rab5	300			0.856	0.053	6.2932
HSBECLIN1_FL	213	222	EKVQAEAERL			8	1171.62	ComplexII_rab5	3000			2.975	0.11	6.2935
HSBECLIN1_FL	213	222	EKVQAEAERL			8	1171.62	ComplexII_solo	0			0	0	6.3957
HSBECLIN1_FL	213	222	EKVQAEAERL			8	1171.62	ComplexII_solo	0.3			0.012	0.026	6.3377
HSBECLIN1_FL	213	222	EKVQAEAERL			8	1171.62	ComplexII_solo	3			0.053	0.046	6.3759
HSBECLIN1_FL	213	222	EKVQAEAERL			8	1171.62	ComplexII_solo	30			0.079	0.025	6.3579
HSBECLIN1_FL	213	222	EKVQAEAERL			8	1171.62	ComplexII_solo	300			0.596	0.018	6.3396
HSBECLIN1_FL	213	222	EKVQAEAERL			8	1171.62	ComplexII_solo	3000			2.779	0.177	6.3154
HSBECLIN1_FL	213	228	EKVQAEAERLDQEEAQ			14	1871.89	ComplexII_rab5	0			0	0	6.6396
HSBECLIN1_FL	213	228	EKVQAEAERLDQEEAQ			14	1871.89	ComplexII_rab5	0.3			0.105	0.03	6.6283
HSBECLIN1_FL	213	228	EKVQAEAERLDQEEAQ			14	1871.89	ComplexII_rab5	3			0.176	0.073	6.6442
HSBECLIN1_FL	213	228	EKVQAEAERLDQEEAQ			14	1871.89	ComplexII_rab5	30			0.525	0.024	6.6227
HSBECLIN1_FL	213	228	EKVQAEAERLDQEEAQ			14	1871.89	ComplexII_rab5	300			2.638	0.024	6.6162
HSBECLIN1_FL	213	228	EKVQAEAERLDQEEAQ			14	1871.89	ComplexII_rab5	3000			6.057	0.111	6.6165
HSBECLIN1_FL	213	228	EKVQAEAERLDQEEAQ			14	1871.89	ComplexII_solo	0			0	0	6.6683
HSBECLIN1_FL	213	228	EKVQAEAERLDQEEAQ			14	1871.89	ComplexII_solo	0.3			0.039	0.015	6.6537
HSBECLIN1_FL	213	228	EKVQAEAERLDQEEAQ			14	1871.89	ComplexII_solo	3			0.111	0.053	6.6675
HSBECLIN1_FL	213	228	EKVQAEAERLDQEEAQ			14	1871.89	ComplexII_solo	30			0.43	0.034	6.653
HSBECLIN1_FL	213	228	EKVQAEAERLDQEEAQ			14	1871.89	ComplexII_solo	300			2.435	0.072	6.6556
HSBECLIN1_FL	213	228	EKVQAEAERLDQEEAQ			14	1871.89	ComplexII_solo	3000			5.945	0.356	6.6384
HSBECLIN1_FL	214	220	KVQAEAE			5	773.392	ComplexII_rab5	0			0	0	4.5771
HSBECLIN1_FL	214	220	KVQAEAE			5	773.392	ComplexII_rab5	0.3			0.072	0.027	4.5567
HSBECLIN1_FL	214	220	KVQAEAE			5	773.392	ComplexII_rab5	3			0.027	0.018	4.5713
HSBECLIN1_FL	214	220	KVQAEAE			5	773.392	ComplexII_rab5	30			0.046	0.04	4.5699
HSBECLIN1_FL	214	220	KVQAEAE			5	773.392	ComplexII_rab5	300			0.339	0.06	4.5811
HSBECLIN1_FL	214	220	KVQAEAE			5	773.392	ComplexII_rab5	3000			1.382	0.037	4.5547
HSBECLIN1_FL	214	220	KVQAEAE			5	773.392	ComplexII_solo	0			0	0	4.5863
HSBECLIN1_FL	214	220	KVQAEAE			5	773.392	ComplexII_solo	0.3			0.03	0.044	4.5835
HSBECLIN1_FL	214	220	KVQAEAE			5	773.392	ComplexII_solo	3			0.01	0.007	4.5964
HSBECLIN1_FL	214	220	KVQAEAE			5	773.392	ComplexII_solo	30			0.084	0.057	4.5958
HSBECLIN1_FL	214	220	KVQAEAE			5	773.392	ComplexII_solo	300			0.467	0.052	4.5859
HSBECLIN1_FL	214	220	KVQAEAE			5	773.392	ComplexII_solo	3000			1.435	0.081	4.5756
HSBECLIN1_FL	229	248	YQREYSEFKRQQLELDDELK			18	2616.28	ComplexII_rab5	0			0	0	9.374
HSBECLIN1_FL	229	248	YQREYSEFKRQQLELDDELK			18	2616.28	ComplexII_rab5	0.3			1.645	0.374	9.3119
HSBECLIN1_FL	229	248	YQREYSEFKRQQLELDDELK			18	2616.28	ComplexII_rab5	3			3.33	0.274	9.3418
HSBECLIN1_FL	229	248	YQREYSEFKRQQLELDDELK			18	2616.28	ComplexII_rab5	30			4.333	0.065	9.347
HSBECLIN1_FL	229	248	YQREYSEFKRQQLELDDELK			18	2616.28	ComplexII_rab5	300			5.426	0.142	9.323
HSBECLIN1_FL	229	248	YQREYSEFKRQQLELDDELK			18	2616.28	ComplexII_rab5	3000			5.96	0.071	9.3411
HSBECLIN1_FL	229	248	YQREYSEFKRQQLELDDELK			18	2616.28	ComplexII_solo	0			0	0	9.4009
HSBECLIN1_FL	229	248	YQREYSEFKRQQLELDDELK			18	2616.28	ComplexII_solo	0.3			1.533	0.319	9.3377
HSBECLIN1_FL	229	248	YQREYSEFKRQQLELDDELK			18	2616.28	ComplexII_solo	3			3.412	0.228	9.3632
HSBECLIN1_FL	229	248	YQREYSEFKRQQLELDDELK			18	2616.28	ComplexII_solo	30			4.366	0.18	9.3564
HSBECLIN1_FL	229	248	YQREYSEFKRQQLELDDELK			18	2616.28	ComplexII_solo	300			5.798	0.283	9.3078
HSBECLIN1_FL	229	248	YQREYSEFKRQQLELDDELK			18	2616.28	ComplexII_solo	3000			5.992	0.634	9.2977
HSBECLIN1_FL	237	243	KRQQLEL			5	913.534	ComplexII_rab5	0			0	0	7.0825
HSBECLIN1_FL	237	243	KRQQLEL			5	913.534	ComplexII_rab5	0.3			0.05	0.021	7.0646
HSBECLIN1_FL	237	243	KRQQLEL			5	913.534	ComplexII_rab5	3			0.025	0.013	7.101
HSBECLIN1_FL	237	243	KRQQLEL			5	913.534	ComplexII_rab5	30			0.065	0.027	7.0728
HSBECLIN1_FL	237	243	KRQQLEL			5	913.534	ComplexII_rab5	300			0.075	0.018	7.0819
HSBECLIN1_FL	237	243	KRQQLEL			5	913.534	ComplexII_rab5	3000			0.349	0.02	7.079
HSBECLIN1_FL	237	243	KRQQLEL			5	913.534	ComplexII_solo	0			0	0	7.1095
HSBECLIN1_FL	237	243	KRQQLEL			5	913.534	ComplexII_solo	0.3			-0.003	0.04	7.1281
HSBECLIN1_FL	237	243	KRQQLEL			5	913.534	ComplexII_solo	3			0.038	0.033	7.1278
HSBECLIN1_FL	237	243	KRQQLEL			5	913.534	ComplexII_solo	30			0.047	0.017	7.1728
HSBECLIN1_FL	237	243	KRQQLEL			5	913.534	ComplexII_solo	300			0.115	0.024	7.1579
HSBECLIN1_FL	237	243	KRQQLEL			5	913.534	ComplexII_solo	3000			0.299	0.035	7.1319
HSBECLIN1_FL	244	261	DDELKSVENQMRYAQTQL			16	2167.02	ComplexII_rab5	0			0	0	10.2987
HSBECLIN1_FL	244	261	DDELKSVENQMRYAQTQL			16	2167.02	ComplexII_rab5	0.3			0.009	0.002	10.2808
HSBECLIN1_FL	244	261	DDELKSVENQMRYAQTQL			16	2167.02	ComplexII_rab5	3			0.006	0.016	10.2734
HSBECLIN1_FL	244	261	DDELKSVENQMRYAQTQL			16	2167.02	ComplexII_rab5	30			0.076	0.013	10.2582
HSBECLIN1_FL	244	261	DDELKSVENQMRYAQTQL			16	2167.02	ComplexII_rab5	300			0.323	0.041	10.2359
HSBECLIN1_FL	244	261	DDELKSVENQMRYAQTQL			16	2167.02	ComplexII_rab5	3000			1.598	0.036	10.2611
HSBECLIN1_FL	244	261	DDELKSVENQMRYAQTQL			16	2167.02	ComplexII_solo	0			0	0	10.2752
HSBECLIN1_FL	244	261	DDELKSVENQMRYAQTQL			16	2167.02	ComplexII_solo	0.3			0.005	0.004	10.2441
HSBECLIN1_FL	244	261	DDELKSVENQMRYAQTQL			16	2167.02	ComplexII_solo	3			0.018	0.009	10.267
HSBECLIN1_FL	244	261	DDELKSVENQMRYAQTQL			16	2167.02	ComplexII_solo	30			0.063	0.015	10.2657
HSBECLIN1_FL	244	261	DDELKSVENQMRYAQTQL			16	2167.02	ComplexII_solo	300			0.373	0.012	10.2555
HSBECLIN1_FL	244	261	DDELKSVENQMRYAQTQL			16	2167.02	ComplexII_solo	3000			1.677	0.142	10.2243
HSBECLIN1_FL	248	254	KSVENQM			5	834.391	ComplexII_rab5	0			0	0	5.4372
HSBECLIN1_FL	248	254	KSVENQM			5	834.391	ComplexII_rab5	0.3			0.098	0.013	5.417
HSBECLIN1_FL	248	254	KSVENQM			5	834.391	ComplexII_rab5	3			0.128	0.099	5.4226
HSBECLIN1_FL	248	254	KSVENQM			5	834.391	ComplexII_rab5	30			0.204	0.051	5.4131
HSBECLIN1_FL	248	254	KSVENQM			5	834.391	ComplexII_rab5	300			0.289	0.023	5.4188
HSBECLIN1_FL	248	254	KSVENQM			5	834.391	ComplexII_rab5	3000			0.242	0.047	5.4155
HSBECLIN1_FL	248	254	KSVENQM			5	834.391	ComplexII_solo	0			0	0	5.4622
HSBECLIN1_FL	248	254	KSVENQM			5	834.391	ComplexII_solo	0.3			0.041	0.022	5.4509
HSBECLIN1_FL	248	254	KSVENQM			5	834.391	ComplexII_solo	3			0.031	0.041	5.46
HSBECLIN1_FL	248	254	KSVENQM			5	834.391	ComplexII_solo	30			0.112	0.062	5.4507
HSBECLIN1_FL	248	254	KSVENQM			5	834.391	ComplexII_solo	300			0.17	0.035	5.439
HSBECLIN1_FL	248	254	KSVENQM			5	834.391	ComplexII_solo	3000			0.173	0.015	5.4379
HSBECLIN1_FL	248	261	KSVENQMRYAQTQL			12	1694.84	ComplexII_rab5	0			0	0	7.753
HSBECLIN1_FL	248	261	KSVENQMRYAQTQL			12	1694.84	ComplexII_rab5	0.3			0.166	0.125	7.7435
HSBECLIN1_FL	248	261	KSVENQMRYAQTQL			12	1694.84	ComplexII_rab5	3			0.099	0.073	7.7522
HSBECLIN1_FL	248	261	KSVENQMRYAQTQL			12	1694.84	ComplexII_rab5	30			0.314	0.077	7.7066
HSBECLIN1_FL	248	261	KSVENQMRYAQTQL			12	1694.84	ComplexII_rab5	300			0.25	0.037	7.7419
HSBECLIN1_FL	248	261	KSVENQMRYAQTQL			12	1694.84	ComplexII_rab5	3000			1.424	0.046	7.732
HSBECLIN1_FL	248	261	KSVENQMRYAQTQL			12	1694.84	ComplexII_solo	0			0	0	7.8027
HSBECLIN1_FL	248	261	KSVENQMRYAQTQL			12	1694.84	ComplexII_solo	0.3			0.026	0.056	7.781
HSBECLIN1_FL	248	261	KSVENQMRYAQTQL			12	1694.84	ComplexII_solo	3			0.037	0.045	7.8139
HSBECLIN1_FL	248	261	KSVENQMRYAQTQL			12	1694.84	ComplexII_solo	30			0.081	0.011	7.7893
HSBECLIN1_FL	248	261	KSVENQMRYAQTQL			12	1694.84	ComplexII_solo	300			0.335	0.045	7.7777
HSBECLIN1_FL	248	261	KSVENQMRYAQTQL			12	1694.84	ComplexII_solo	3000			1.602	0.071	7.7639
HSBECLIN1_FL	255	261	RYAQTQL			5	878.461	ComplexII_rab5	0			0	0	6.4912
HSBECLIN1_FL	255	261	RYAQTQL			5	878.461	ComplexII_rab5	0.3			0.057	0.009	6.4815
HSBECLIN1_FL	255	261	RYAQTQL			5	878.461	ComplexII_rab5	3			0.027	0.011	6.5028
HSBECLIN1_FL	255	261	RYAQTQL			5	878.461	ComplexII_rab5	30			0.058	0.025	6.483
HSBECLIN1_FL	255	261	RYAQTQL			5	878.461	ComplexII_rab5	300			0.248	0.015	6.4817
HSBECLIN1_FL	255	261	RYAQTQL			5	878.461	ComplexII_rab5	3000			1.103	0.017	6.4733
HSBECLIN1_FL	255	261	RYAQTQL			5	878.461	ComplexII_solo	0			0	0	6.5303
HSBECLIN1_FL	255	261	RYAQTQL			5	878.461	ComplexII_solo	0.3			0.036	0.036	6.5175
HSBECLIN1_FL	255	261	RYAQTQL			5	878.461	ComplexII_solo	3			0.016	0.018	6.5383
HSBECLIN1_FL	255	261	RYAQTQL			5	878.461	ComplexII_solo	30			0.069	0.026	6.5395
HSBECLIN1_FL	255	261	RYAQTQL			5	878.461	ComplexII_solo	300			0.283	0.027	6.5195
HSBECLIN1_FL	255	261	RYAQTQL			5	878.461	ComplexII_solo	3000			1.16	0.077	6.5092
HSBECLIN1_FL	262	269	DKLKKTNV			6	944.566	ComplexII_rab5	0			0	0	4.2069
HSBECLIN1_FL	262	269	DKLKKTNV			6	944.566	ComplexII_rab5	0.3			0.705	0.122	4.1866
HSBECLIN1_FL	262	269	DKLKKTNV			6	944.566	ComplexII_rab5	3			1.566	0.125	4.2012
HSBECLIN1_FL	262	269	DKLKKTNV			6	944.566	ComplexII_rab5	30			2.127	0.044	4.1856
HSBECLIN1_FL	262	269	DKLKKTNV			6	944.566	ComplexII_rab5	300			2.739	0.054	4.1984
HSBECLIN1_FL	262	269	DKLKKTNV			6	944.566	ComplexII_rab5	3000			3.177	0.036	4.1877
HSBECLIN1_FL	262	269	DKLKKTNV			6	944.566	ComplexII_solo	0			0	0	4.2229
HSBECLIN1_FL	262	269	DKLKKTNV			6	944.566	ComplexII_solo	0.3			0.668	0.031	4.1959
HSBECLIN1_FL	262	269	DKLKKTNV			6	944.566	ComplexII_solo	3			1.63	0.117	4.2123
HSBECLIN1_FL	262	269	DKLKKTNV			6	944.566	ComplexII_solo	30			2.193	0.098	4.2152
HSBECLIN1_FL	262	269	DKLKKTNV			6	944.566	ComplexII_solo	300			2.91	0.075	4.1947
HSBECLIN1_FL	262	269	DKLKKTNV			6	944.566	ComplexII_solo	3000			3.301	0.098	4.1632
HSBECLIN1_FL	262	274	DKLKKTNVFNATF			11	1524.83	ComplexII_rab5	0			0	0	8.6744
HSBECLIN1_FL	262	274	DKLKKTNVFNATF			11	1524.83	ComplexII_rab5	0.3			0.58	0.11	8.6229
HSBECLIN1_FL	262	274	DKLKKTNVFNATF			11	1524.83	ComplexII_rab5	3			1.498	0.124	8.6456
HSBECLIN1_FL	262	274	DKLKKTNVFNATF			11	1524.83	ComplexII_rab5	30			2.41	0.081	8.6298
HSBECLIN1_FL	262	274	DKLKKTNVFNATF			11	1524.83	ComplexII_rab5	300			3.32	0.029	8.6302
HSBECLIN1_FL	262	274	DKLKKTNVFNATF			11	1524.83	ComplexII_rab5	3000			4.503	0.071	8.622
HSBECLIN1_FL	262	274	DKLKKTNVFNATF			11	1524.83	ComplexII_solo	0			0	0	8.7048
HSBECLIN1_FL	262	274	DKLKKTNVFNATF			11	1524.83	ComplexII_solo	0.3			0.541	0.007	8.6553
HSBECLIN1_FL	262	274	DKLKKTNVFNATF			11	1524.83	ComplexII_solo	3			1.591	0.141	8.6915
HSBECLIN1_FL	262	274	DKLKKTNVFNATF			11	1524.83	ComplexII_solo	30			2.508	0.114	8.6757
HSBECLIN1_FL	262	274	DKLKKTNVFNATF			11	1524.83	ComplexII_solo	300			3.552	0.066	8.6484
HSBECLIN1_FL	262	274	DKLKKTNVFNATF			11	1524.83	ComplexII_solo	3000			4.628	0.153	8.6766
HSBECLIN1_FL	271	287	NATFHIWHSGQFGTINN			15	1942.91	ComplexII_rab5	0			0	0	9.3862
HSBECLIN1_FL	271	287	NATFHIWHSGQFGTINN			15	1942.91	ComplexII_rab5	0.3			0.645	0.098	9.3067
HSBECLIN1_FL	271	287	NATFHIWHSGQFGTINN			15	1942.91	ComplexII_rab5	3			1.094	0.079	9.3331
HSBECLIN1_FL	271	287	NATFHIWHSGQFGTINN			15	1942.91	ComplexII_rab5	30			1.538	0.144	9.3156
HSBECLIN1_FL	271	287	NATFHIWHSGQFGTINN			15	1942.91	ComplexII_rab5	300			2.055	0.051	9.2968
HSBECLIN1_FL	271	287	NATFHIWHSGQFGTINN			15	1942.91	ComplexII_rab5	3000			2.697	0.088	9.2992
HSBECLIN1_FL	271	287	NATFHIWHSGQFGTINN			15	1942.91	ComplexII_solo	0			0	0	9.3817
HSBECLIN1_FL	271	287	NATFHIWHSGQFGTINN			15	1942.91	ComplexII_solo	0.3			0.611	0.078	9.3045
HSBECLIN1_FL	271	287	NATFHIWHSGQFGTINN			15	1942.91	ComplexII_solo	3			1.027	0.124	9.3422
HSBECLIN1_FL	271	287	NATFHIWHSGQFGTINN			15	1942.91	ComplexII_solo	30			1.631	0.183	9.3424
HSBECLIN1_FL	271	287	NATFHIWHSGQFGTINN			15	1942.91	ComplexII_solo	300			2.218	0.192	9.3252
HSBECLIN1_FL	271	287	NATFHIWHSGQFGTINN			15	1942.91	ComplexII_solo	3000			2.664	0.22	9.3134
HSBECLIN1_FL	275	282	HIWHSGQF			6	1010.47	ComplexII_rab5	0			0	0	7.5312
HSBECLIN1_FL	275	282	HIWHSGQF			6	1010.47	ComplexII_rab5	0.3			0.301	0.106	7.5077
HSBECLIN1_FL	275	282	HIWHSGQF			6	1010.47	ComplexII_rab5	3			0.388	0.084	7.534
HSBECLIN1_FL	275	282	HIWHSGQF			6	1010.47	ComplexII_rab5	30			0.589	0.006	7.5127
HSBECLIN1_FL	275	282	HIWHSGQF			6	1010.47	ComplexII_rab5	300			1.15	0.041	7.5201
HSBECLIN1_FL	275	282	HIWHSGQF			6	1010.47	ComplexII_rab5	3000			1.438	0.047	7.5277
HSBECLIN1_FL	275	282	HIWHSGQF			6	1010.47	ComplexII_solo	0			0	0	7.6053
HSBECLIN1_FL	275	282	HIWHSGQF			6	1010.47	ComplexII_solo	0.3			0.198	0.04	7.568
HSBECLIN1_FL	275	282	HIWHSGQF			6	1010.47	ComplexII_solo	3			0.39	0.037	7.5939
HSBECLIN1_FL	275	282	HIWHSGQF			6	1010.47	ComplexII_solo	30			0.585	0.081	7.5798
HSBECLIN1_FL	275	282	HIWHSGQF			6	1010.47	ComplexII_solo	300			1.122	0.055	7.5682
HSBECLIN1_FL	275	282	HIWHSGQF			6	1010.47	ComplexII_solo	3000			1.402	0.032	7.5597
HSBECLIN1_FL	275	287	HIWHSGQFGTINN			11	1509.71	ComplexII_rab5	0			0	0	7.6587
HSBECLIN1_FL	275	287	HIWHSGQFGTINN			11	1509.71	ComplexII_rab5	0.3			0.333	0.028	7.6177
HSBECLIN1_FL	275	287	HIWHSGQFGTINN			11	1509.71	ComplexII_rab5	3			0.513	0.06	7.6387
HSBECLIN1_FL	275	287	HIWHSGQFGTINN			11	1509.71	ComplexII_rab5	30			0.945	0.043	7.6227
HSBECLIN1_FL	275	287	HIWHSGQFGTINN			11	1509.71	ComplexII_rab5	300			1.376	0.036	7.6249
HSBECLIN1_FL	275	287	HIWHSGQFGTINN			11	1509.71	ComplexII_rab5	3000			1.813	0.032	7.622
HSBECLIN1_FL	275	287	HIWHSGQFGTINN			11	1509.71	ComplexII_solo	0			0	0	7.7014
HSBECLIN1_FL	275	287	HIWHSGQFGTINN			11	1509.71	ComplexII_solo	0.3			0.288	0.036	7.671
HSBECLIN1_FL	275	287	HIWHSGQFGTINN			11	1509.71	ComplexII_solo	3			0.578	0.032	7.6986
HSBECLIN1_FL	275	287	HIWHSGQFGTINN			11	1509.71	ComplexII_solo	30			0.943	0.052	7.6723
HSBECLIN1_FL	275	287	HIWHSGQFGTINN			11	1509.71	ComplexII_solo	300			1.485	0.077	7.6625
HSBECLIN1_FL	275	287	HIWHSGQFGTINN			11	1509.71	ComplexII_solo	3000			1.836	0.154	7.6435
HSBECLIN1_FL	275	288	HIWHSGQFGTINNF			12	1656.78	ComplexII_rab5	0			0	0	9.3129
HSBECLIN1_FL	275	288	HIWHSGQFGTINNF			12	1656.78	ComplexII_rab5	0.3			0.617	0.052	9.2805
HSBECLIN1_FL	275	288	HIWHSGQFGTINNF			12	1656.78	ComplexII_rab5	3			0.839	0.162	9.3016
HSBECLIN1_FL	275	288	HIWHSGQFGTINNF			12	1656.78	ComplexII_rab5	30			1.139	0.083	9.2824
HSBECLIN1_FL	275	288	HIWHSGQFGTINNF			12	1656.78	ComplexII_rab5	300			1.548	0.068	9.2636
HSBECLIN1_FL	275	288	HIWHSGQFGTINNF			12	1656.78	ComplexII_rab5	3000			1.988	0.086	9.2905
HSBECLIN1_FL	275	288	HIWHSGQFGTINNF			12	1656.78	ComplexII_solo	0			0	0	9.3189
HSBECLIN1_FL	275	288	HIWHSGQFGTINNF			12	1656.78	ComplexII_solo	0.3			0.487	0.041	9.2748
HSBECLIN1_FL	275	288	HIWHSGQFGTINNF			12	1656.78	ComplexII_solo	3			0.793	0.158	9.3318
HSBECLIN1_FL	275	288	HIWHSGQFGTINNF			12	1656.78	ComplexII_solo	30			1.203	0.076	9.3144
HSBECLIN1_FL	275	288	HIWHSGQFGTINNF			12	1656.78	ComplexII_solo	300			1.732	0.084	9.2991
HSBECLIN1_FL	275	288	HIWHSGQFGTINNF			12	1656.78	ComplexII_solo	3000			1.916	0.193	9.2803
HSBECLIN1_FL	288	300	FRLGRLPSVPVEW			9	1554.87	ComplexII_rab5	0			0	0	10.9247
HSBECLIN1_FL	288	300	FRLGRLPSVPVEW			9	1554.87	ComplexII_rab5	0.3			0.854	0.09	10.8697
HSBECLIN1_FL	288	300	FRLGRLPSVPVEW			9	1554.87	ComplexII_rab5	3			1.231	0.109	10.9374
HSBECLIN1_FL	288	300	FRLGRLPSVPVEW			9	1554.87	ComplexII_rab5	30			1.878	0.052	10.8822
HSBECLIN1_FL	288	300	FRLGRLPSVPVEW			9	1554.87	ComplexII_rab5	300			3.059	0.055	10.894
HSBECLIN1_FL	288	300	FRLGRLPSVPVEW			9	1554.87	ComplexII_rab5	3000			3.495	0.02	10.8679
HSBECLIN1_FL	288	300	FRLGRLPSVPVEW			9	1554.87	ComplexII_solo	0			0	0	10.8945
HSBECLIN1_FL	288	300	FRLGRLPSVPVEW			9	1554.87	ComplexII_solo	0.3			0.702	0.065	10.832
HSBECLIN1_FL	288	300	FRLGRLPSVPVEW			9	1554.87	ComplexII_solo	3			1.288	0.076	10.8961
HSBECLIN1_FL	288	300	FRLGRLPSVPVEW			9	1554.87	ComplexII_solo	30			1.927	0.091	10.8764
HSBECLIN1_FL	288	300	FRLGRLPSVPVEW			9	1554.87	ComplexII_solo	300			3.288	0.062	10.8327
HSBECLIN1_FL	288	300	FRLGRLPSVPVEW			9	1554.87	ComplexII_solo	3000			3.559	0.245	10.8189
HSBECLIN1_FL	288	302	FRLGRLPSVPVEWNE			11	1797.95	ComplexII_rab5	0			0	0	10.1922
HSBECLIN1_FL	288	302	FRLGRLPSVPVEWNE			11	1797.95	ComplexII_rab5	0.3			1.228	0.166	10.1603
HSBECLIN1_FL	288	302	FRLGRLPSVPVEWNE			11	1797.95	ComplexII_rab5	3			1.693	0.234	10.1879
HSBECLIN1_FL	288	302	FRLGRLPSVPVEWNE			11	1797.95	ComplexII_rab5	30			2.474	0.05	10.1622
HSBECLIN1_FL	288	302	FRLGRLPSVPVEWNE			11	1797.95	ComplexII_rab5	300			4.041	0.072	10.1364
HSBECLIN1_FL	288	302	FRLGRLPSVPVEWNE			11	1797.95	ComplexII_rab5	3000			4.478	0.071	10.158
HSBECLIN1_FL	288	302	FRLGRLPSVPVEWNE			11	1797.95	ComplexII_solo	0			0	0	10.2159
HSBECLIN1_FL	288	302	FRLGRLPSVPVEWNE			11	1797.95	ComplexII_solo	0.3			0.93	0.084	10.1568
HSBECLIN1_FL	288	302	FRLGRLPSVPVEWNE			11	1797.95	ComplexII_solo	3			1.716	0.114	10.1885
HSBECLIN1_FL	288	302	FRLGRLPSVPVEWNE			11	1797.95	ComplexII_solo	30			2.479	0.102	10.1679
HSBECLIN1_FL	288	302	FRLGRLPSVPVEWNE			11	1797.95	ComplexII_solo	300			4.309	0.044	10.1525
HSBECLIN1_FL	288	302	FRLGRLPSVPVEWNE			11	1797.95	ComplexII_solo	3000			4.685	0.05	10.1667
HSBECLIN1_FL	288	304	FRLGRLPSVPVEWNEIN			13	2025.08	ComplexII_rab5	0			0	0	10.5292
HSBECLIN1_FL	288	304	FRLGRLPSVPVEWNEIN			13	2025.08	ComplexII_rab5	0.3			1.229	0.144	10.4344
HSBECLIN1_FL	288	304	FRLGRLPSVPVEWNEIN			13	2025.08	ComplexII_rab5	3			1.706	0.138	10.455
HSBECLIN1_FL	288	304	FRLGRLPSVPVEWNEIN			13	2025.08	ComplexII_rab5	30			2.501	0.089	10.4398
HSBECLIN1_FL	288	304	FRLGRLPSVPVEWNEIN			13	2025.08	ComplexII_rab5	300			4.126	0.09	10.4175
HSBECLIN1_FL	288	304	FRLGRLPSVPVEWNEIN			13	2025.08	ComplexII_rab5	3000			4.549	0.012	10.4409
HSBECLIN1_FL	288	304	FRLGRLPSVPVEWNEIN			13	2025.08	ComplexII_solo	0			0	0	10.4918
HSBECLIN1_FL	288	304	FRLGRLPSVPVEWNEIN			13	2025.08	ComplexII_solo	0.3			1.058	0.112	10.4344
HSBECLIN1_FL	288	304	FRLGRLPSVPVEWNEIN			13	2025.08	ComplexII_solo	3			1.802	0.095	10.4538
HSBECLIN1_FL	288	304	FRLGRLPSVPVEWNEIN			13	2025.08	ComplexII_solo	30			2.59	0.102	10.4385
HSBECLIN1_FL	288	304	FRLGRLPSVPVEWNEIN			13	2025.08	ComplexII_solo	300			4.395	0.088	10.4179
HSBECLIN1_FL	288	304	FRLGRLPSVPVEWNEIN			13	2025.08	ComplexII_solo	3000			4.839	0.024	10.3675
HSBECLIN1_FL	288	312	FRLGRLPSVPVEWNEINAAWGQTVL			21	2851.51	ComplexII_rab5	0			0	0	12.2755
HSBECLIN1_FL	288	312	FRLGRLPSVPVEWNEINAAWGQTVL			21	2851.51	ComplexII_rab5	0.3			1.273	0.128	12.2262
HSBECLIN1_FL	288	312	FRLGRLPSVPVEWNEINAAWGQTVL			21	2851.51	ComplexII_rab5	3			1.738	0.132	12.2311
HSBECLIN1_FL	288	312	FRLGRLPSVPVEWNEINAAWGQTVL			21	2851.51	ComplexII_rab5	30			2.607	0.121	12.2408
HSBECLIN1_FL	288	312	FRLGRLPSVPVEWNEINAAWGQTVL			21	2851.51	ComplexII_rab5	300			4.223	0.044	12.1993
HSBECLIN1_FL	288	312	FRLGRLPSVPVEWNEINAAWGQTVL			21	2851.51	ComplexII_rab5	3000			4.557	0.052	12.2466
HSBECLIN1_FL	288	312	FRLGRLPSVPVEWNEINAAWGQTVL			21	2851.51	ComplexII_solo	0			0	0	12.2927
HSBECLIN1_FL	288	312	FRLGRLPSVPVEWNEINAAWGQTVL			21	2851.51	ComplexII_solo	0.3			1.064	0.084	12.228
HSBECLIN1_FL	288	312	FRLGRLPSVPVEWNEINAAWGQTVL			21	2851.51	ComplexII_solo	3			1.816	0.11	12.2526
HSBECLIN1_FL	288	312	FRLGRLPSVPVEWNEINAAWGQTVL			21	2851.51	ComplexII_solo	30			2.72	0.111	12.203
HSBECLIN1_FL	288	312	FRLGRLPSVPVEWNEINAAWGQTVL			21	2851.51	ComplexII_solo	300			4.283	0.214	12.2449
HSBECLIN1_FL	288	312	FRLGRLPSVPVEWNEINAAWGQTVL			21	2851.51	ComplexII_solo	3000			4.615	0.28	12.1855
HSBECLIN1_FL	289	300	RLGRLPSVPVEW			8	1407.8	ComplexII_rab5	0			0	0	9.9162
HSBECLIN1_FL	289	300	RLGRLPSVPVEW			8	1407.8	ComplexII_rab5	0.3			0.77	0.115	9.8623
HSBECLIN1_FL	289	300	RLGRLPSVPVEW			8	1407.8	ComplexII_rab5	3			1.091	0.13	9.9088
HSBECLIN1_FL	289	300	RLGRLPSVPVEW			8	1407.8	ComplexII_rab5	30			1.916	0.085	9.8848
HSBECLIN1_FL	289	300	RLGRLPSVPVEW			8	1407.8	ComplexII_rab5	300			3.057	0.052	9.8559
HSBECLIN1_FL	289	300	RLGRLPSVPVEW			8	1407.8	ComplexII_rab5	3000			3.43	0.017	9.891
HSBECLIN1_FL	289	300	RLGRLPSVPVEW			8	1407.8	ComplexII_solo	0			0	0	9.935
HSBECLIN1_FL	289	300	RLGRLPSVPVEW			8	1407.8	ComplexII_solo	0.3			0.734	0.03	9.8849
HSBECLIN1_FL	289	300	RLGRLPSVPVEW			8	1407.8	ComplexII_solo	3			1.309	0.111	9.9386
HSBECLIN1_FL	289	300	RLGRLPSVPVEW			8	1407.8	ComplexII_solo	30			2.104	0.094	9.9145
HSBECLIN1_FL	289	300	RLGRLPSVPVEW			8	1407.8	ComplexII_solo	300			3.481	0.078	9.8806
HSBECLIN1_FL	289	300	RLGRLPSVPVEW			8	1407.8	ComplexII_solo	3000			3.749	0.053	9.8966
HSBECLIN1_FL	313	325	LLHALANKMGLKF			11	1454.84	ComplexII_rab5	0			0	0	9.1977
HSBECLIN1_FL	313	325	LLHALANKMGLKF			11	1454.84	ComplexII_rab5	0.3			0.174	0.044	9.1722
HSBECLIN1_FL	313	325	LLHALANKMGLKF			11	1454.84	ComplexII_rab5	3			0.747	0.071	9.1812
HSBECLIN1_FL	313	325	LLHALANKMGLKF			11	1454.84	ComplexII_rab5	30			1.238	0.038	9.1689
HSBECLIN1_FL	313	325	LLHALANKMGLKF			11	1454.84	ComplexII_rab5	300			1.775	0.054	9.1501
HSBECLIN1_FL	313	325	LLHALANKMGLKF			11	1454.84	ComplexII_rab5	3000			2.359	0.036	9.1631
HSBECLIN1_FL	313	325	LLHALANKMGLKF			11	1454.84	ComplexII_solo	0			0	0	9.2001
HSBECLIN1_FL	313	325	LLHALANKMGLKF			11	1454.84	ComplexII_solo	0.3			0.146	0.025	9.1577
HSBECLIN1_FL	313	325	LLHALANKMGLKF			11	1454.84	ComplexII_solo	3			0.914	0.129	9.1973
HSBECLIN1_FL	313	325	LLHALANKMGLKF			11	1454.84	ComplexII_solo	30			1.218	0.101	9.1956
HSBECLIN1_FL	313	325	LLHALANKMGLKF			11	1454.84	ComplexII_solo	300			1.888	0.051	9.1804
HSBECLIN1_FL	313	325	LLHALANKMGLKF			11	1454.84	ComplexII_solo	3000			2.378	0.159	9.1528
HSBECLIN1_FL	315	339	HALANKMGLKFQRYRLVPYGNHSYL			22	2975.57	ComplexII_rab5	0			0	0	8.4369
HSBECLIN1_FL	315	339	HALANKMGLKFQRYRLVPYGNHSYL			22	2975.57	ComplexII_rab5	0.3			0.243	0.165	8.4203
HSBECLIN1_FL	315	339	HALANKMGLKFQRYRLVPYGNHSYL			22	2975.57	ComplexII_rab5	3			1.042	0.072	8.4134
HSBECLIN1_FL	315	339	HALANKMGLKFQRYRLVPYGNHSYL			22	2975.57	ComplexII_rab5	30			1.802	0.06	8.3976
HSBECLIN1_FL	315	339	HALANKMGLKFQRYRLVPYGNHSYL			22	2975.57	ComplexII_rab5	300			3.449	0.123	8.3857
HSBECLIN1_FL	315	339	HALANKMGLKFQRYRLVPYGNHSYL			22	2975.57	ComplexII_rab5	3000			4.88	0.025	8.4056
HSBECLIN1_FL	315	339	HALANKMGLKFQRYRLVPYGNHSYL			22	2975.57	ComplexII_solo	0			0	0	8.4638
HSBECLIN1_FL	315	339	HALANKMGLKFQRYRLVPYGNHSYL			22	2975.57	ComplexII_solo	0.3			0.271	0.026	8.43
HSBECLIN1_FL	315	339	HALANKMGLKFQRYRLVPYGNHSYL			22	2975.57	ComplexII_solo	3			1.194	0.065	8.468
HSBECLIN1_FL	315	339	HALANKMGLKFQRYRLVPYGNHSYL			22	2975.57	ComplexII_solo	30			1.994	0.089	8.4592
HSBECLIN1_FL	315	339	HALANKMGLKFQRYRLVPYGNHSYL			22	2975.57	ComplexII_solo	300			3.682	0.066	8.4302
HSBECLIN1_FL	315	339	HALANKMGLKFQRYRLVPYGNHSYL			22	2975.57	ComplexII_solo	3000			4.901	0.348	8.4112
HSBECLIN1_FL	340	359	ESLTDKSKELPLYCSGGLRF			17	2242.13	ComplexII_rab5	0			0	0	10.2393
HSBECLIN1_FL	340	359	ESLTDKSKELPLYCSGGLRF			17	2242.13	ComplexII_rab5	0.3			3.619	0.425	10.2109
HSBECLIN1_FL	340	359	ESLTDKSKELPLYCSGGLRF			17	2242.13	ComplexII_rab5	3			4.996	0.463	10.2315
HSBECLIN1_FL	340	359	ESLTDKSKELPLYCSGGLRF			17	2242.13	ComplexII_rab5	30			6.22	0.182	10.2041
HSBECLIN1_FL	340	359	ESLTDKSKELPLYCSGGLRF			17	2242.13	ComplexII_rab5	300			6.821	0.179	10.1975
HSBECLIN1_FL	340	359	ESLTDKSKELPLYCSGGLRF			17	2242.13	ComplexII_rab5	3000			7.129	0.076	10.2244
HSBECLIN1_FL	340	359	ESLTDKSKELPLYCSGGLRF			17	2242.13	ComplexII_solo	0			0	0	10.2525
HSBECLIN1_FL	340	359	ESLTDKSKELPLYCSGGLRF			17	2242.13	ComplexII_solo	0.3			3.01	0.283	10.2196
HSBECLIN1_FL	340	359	ESLTDKSKELPLYCSGGLRF			17	2242.13	ComplexII_solo	3			5.225	0.347	10.2391
HSBECLIN1_FL	340	359	ESLTDKSKELPLYCSGGLRF			17	2242.13	ComplexII_solo	30			6.22	0.231	10.2395
HSBECLIN1_FL	340	359	ESLTDKSKELPLYCSGGLRF			17	2242.13	ComplexII_solo	300			7.191	0.295	10.238
HSBECLIN1_FL	340	359	ESLTDKSKELPLYCSGGLRF			17	2242.13	ComplexII_solo	3000			7.202	0.56	10.2016
HSBECLIN1_FL	342	359	LTDKSKELPLYCSGGLRF			15	2026.06	ComplexII_rab5	0			0	0	9.9874
HSBECLIN1_FL	342	359	LTDKSKELPLYCSGGLRF			15	2026.06	ComplexII_rab5	0.3			2.972	0.346	9.965
HSBECLIN1_FL	342	359	LTDKSKELPLYCSGGLRF			15	2026.06	ComplexII_rab5	3			4.081	0.353	9.9817
HSBECLIN1_FL	342	359	LTDKSKELPLYCSGGLRF			15	2026.06	ComplexII_rab5	30			5.048	0.179	9.9752
HSBECLIN1_FL	342	359	LTDKSKELPLYCSGGLRF			15	2026.06	ComplexII_rab5	300			5.413	0.119	9.9599
HSBECLIN1_FL	342	359	LTDKSKELPLYCSGGLRF			15	2026.06	ComplexII_rab5	3000			5.646	0.075	9.9724
HSBECLIN1_FL	342	359	LTDKSKELPLYCSGGLRF			15	2026.06	ComplexII_solo	0			0	0	9.9936
HSBECLIN1_FL	342	359	LTDKSKELPLYCSGGLRF			15	2026.06	ComplexII_solo	0.3			2.469	0.168	9.9803
HSBECLIN1_FL	342	359	LTDKSKELPLYCSGGLRF			15	2026.06	ComplexII_solo	3			4.247	0.205	9.9994
HSBECLIN1_FL	342	359	LTDKSKELPLYCSGGLRF			15	2026.06	ComplexII_solo	30			5.075	0.223	9.9725
HSBECLIN1_FL	342	359	LTDKSKELPLYCSGGLRF			15	2026.06	ComplexII_solo	300			5.799	0.185	9.9532
HSBECLIN1_FL	342	359	LTDKSKELPLYCSGGLRF			15	2026.06	ComplexII_solo	3000			5.736	0.44	9.9452
HSBECLIN1_FL	351	357	LYCSGGL			5	711.326	ComplexII_rab5	0			0	0	7.87
HSBECLIN1_FL	351	357	LYCSGGL			5	711.326	ComplexII_rab5	0.3			0.027	0.019	7.8535
HSBECLIN1_FL	351	357	LYCSGGL			5	711.326	ComplexII_rab5	3			0.012	0.017	7.8814
HSBECLIN1_FL	351	357	LYCSGGL			5	711.326	ComplexII_rab5	30			0.025	0.019	7.8656
HSBECLIN1_FL	351	357	LYCSGGL			5	711.326	ComplexII_rab5	300			0.065	0.031	7.8589
HSBECLIN1_FL	351	357	LYCSGGL			5	711.326	ComplexII_rab5	3000			0.203	0.013	7.8578
HSBECLIN1_FL	351	357	LYCSGGL			5	711.326	ComplexII_solo	0			0	0	7.9162
HSBECLIN1_FL	351	357	LYCSGGL			5	711.326	ComplexII_solo	0.3			-0.019	0.024	7.9086
HSBECLIN1_FL	351	357	LYCSGGL			5	711.326	ComplexII_solo	3			-0.017	0.023	7.9344
HSBECLIN1_FL	351	357	LYCSGGL			5	711.326	ComplexII_solo	30			-0.021	0.03	7.9132
HSBECLIN1_FL	351	357	LYCSGGL			5	711.326	ComplexII_solo	300			-0.01	0.006	7.9131
HSBECLIN1_FL	351	357	LYCSGGL			5	711.326	ComplexII_solo	3000			0.133	0.015	7.8932
HSBECLIN1_FL	360	369	FWDNKFDHAM			8	1309.56	ComplexII_rab5	0			0	0	9.2082
HSBECLIN1_FL	360	369	FWDNKFDHAM			8	1309.56	ComplexII_rab5	0.3			0.279	0.044	9.1653
HSBECLIN1_FL	360	369	FWDNKFDHAM			8	1309.56	ComplexII_rab5	3			0.449	0.08	9.1864
HSBECLIN1_FL	360	369	FWDNKFDHAM			8	1309.56	ComplexII_rab5	30			0.662	0.024	9.1759
HSBECLIN1_FL	360	369	FWDNKFDHAM			8	1309.56	ComplexII_rab5	300			1.102	0.024	9.1711
HSBECLIN1_FL	360	369	FWDNKFDHAM			8	1309.56	ComplexII_rab5	3000			1.219	0.02	9.191
HSBECLIN1_FL	360	369	FWDNKFDHAM			8	1309.56	ComplexII_solo	0			0	0	9.2455
HSBECLIN1_FL	360	369	FWDNKFDHAM			8	1309.56	ComplexII_solo	0.3			0.227	0.043	9.1927
HSBECLIN1_FL	360	369	FWDNKFDHAM			8	1309.56	ComplexII_solo	3			0.475	0.023	9.2357
HSBECLIN1_FL	360	369	FWDNKFDHAM			8	1309.56	ComplexII_solo	30			0.708	0.009	9.2061
HSBECLIN1_FL	360	369	FWDNKFDHAM			8	1309.56	ComplexII_solo	300			1.227	0.036	9.1943
HSBECLIN1_FL	360	369	FWDNKFDHAM			8	1309.56	ComplexII_solo	3000			1.249	0.101	9.1808
HSBECLIN1_FL	360	371	FWDNKFDHAMVA			10	1479.66	ComplexII_rab5	0			0	0	9.4596
HSBECLIN1_FL	360	371	FWDNKFDHAMVA			10	1479.66	ComplexII_rab5	0.3			0.344	0.115	9.443
HSBECLIN1_FL	360	371	FWDNKFDHAMVA			10	1479.66	ComplexII_rab5	3			0.535	0.066	9.4535
HSBECLIN1_FL	360	371	FWDNKFDHAMVA			10	1479.66	ComplexII_rab5	30			0.755	0.147	9.4431
HSBECLIN1_FL	360	371	FWDNKFDHAMVA			10	1479.66	ComplexII_rab5	300			1.038	0.138	9.4539
HSBECLIN1_FL	360	371	FWDNKFDHAMVA			10	1479.66	ComplexII_rab5	3000			1.222	0.049	9.4511
HSBECLIN1_FL	360	371	FWDNKFDHAMVA			10	1479.66	ComplexII_solo	0			0	0	9.4708
HSBECLIN1_FL	360	371	FWDNKFDHAMVA			10	1479.66	ComplexII_solo	0.3			0.12	0.044	9.4513
HSBECLIN1_FL	360	371	FWDNKFDHAMVA			10	1479.66	ComplexII_solo	3			0.488	0.113	9.4679
HSBECLIN1_FL	360	371	FWDNKFDHAMVA			10	1479.66	ComplexII_solo	30			0.689	0.126	9.4647
HSBECLIN1_FL	360	371	FWDNKFDHAMVA			10	1479.66	ComplexII_solo	300			1.079	0.078	9.4544
HSBECLIN1_FL	360	371	FWDNKFDHAMVA			10	1479.66	ComplexII_solo	3000			1.232	0.115	9.4618
HSBECLIN1_FL	360	372	FWDNKFDHAMVAF			11	1626.73	ComplexII_rab5	0			0	0	10.9994
HSBECLIN1_FL	360	372	FWDNKFDHAMVAF			11	1626.73	ComplexII_rab5	0.3			0.327	0.065	10.9727
HSBECLIN1_FL	360	372	FWDNKFDHAMVAF			11	1626.73	ComplexII_rab5	3			0.429	0.079	11.0261
HSBECLIN1_FL	360	372	FWDNKFDHAMVAF			11	1626.73	ComplexII_rab5	30			0.648	0.045	10.9765
HSBECLIN1_FL	360	372	FWDNKFDHAMVAF			11	1626.73	ComplexII_rab5	300			1.04	0.079	10.9617
HSBECLIN1_FL	360	372	FWDNKFDHAMVAF			11	1626.73	ComplexII_rab5	3000			1.162	0.027	10.9862
HSBECLIN1_FL	360	372	FWDNKFDHAMVAF			11	1626.73	ComplexII_solo	0			0	0	10.981
HSBECLIN1_FL	360	372	FWDNKFDHAMVAF			11	1626.73	ComplexII_solo	0.3			0.197	0.09	10.9731
HSBECLIN1_FL	360	372	FWDNKFDHAMVAF			11	1626.73	ComplexII_solo	3			0.437	0.017	10.9974
HSBECLIN1_FL	360	372	FWDNKFDHAMVAF			11	1626.73	ComplexII_solo	30			0.752	0.11	10.9633
HSBECLIN1_FL	360	372	FWDNKFDHAMVAF			11	1626.73	ComplexII_solo	300			1.174	0.105	10.9606
HSBECLIN1_FL	360	372	FWDNKFDHAMVAF			11	1626.73	ComplexII_solo	3000			1.114	0.095	10.9506
HSBECLIN1_FL	373	396	LDCVQQFKEEVEKGETRFCLPYRM			21	2947.4	ComplexII_rab5	0			0	0	11.295
HSBECLIN1_FL	373	396	LDCVQQFKEEVEKGETRFCLPYRM			21	2947.4	ComplexII_rab5	0.3			1.941	0.174	11.2456
HSBECLIN1_FL	373	396	LDCVQQFKEEVEKGETRFCLPYRM			21	2947.4	ComplexII_rab5	3			3.645	0.358	11.2679
HSBECLIN1_FL	373	396	LDCVQQFKEEVEKGETRFCLPYRM			21	2947.4	ComplexII_rab5	30			4.774	0.109	11.26
HSBECLIN1_FL	373	396	LDCVQQFKEEVEKGETRFCLPYRM			21	2947.4	ComplexII_rab5	300			6.062	0.234	11.2448
HSBECLIN1_FL	373	396	LDCVQQFKEEVEKGETRFCLPYRM			21	2947.4	ComplexII_rab5	3000			6.542	0.018	11.2504
HSBECLIN1_FL	373	396	LDCVQQFKEEVEKGETRFCLPYRM			21	2947.4	ComplexII_solo	0			0	0	11.2981
HSBECLIN1_FL	373	396	LDCVQQFKEEVEKGETRFCLPYRM			21	2947.4	ComplexII_solo	0.3			1.773	0.174	11.2423
HSBECLIN1_FL	373	396	LDCVQQFKEEVEKGETRFCLPYRM			21	2947.4	ComplexII_solo	3			4.006	0.37	11.2877
HSBECLIN1_FL	373	396	LDCVQQFKEEVEKGETRFCLPYRM			21	2947.4	ComplexII_solo	30			5.126	0.255	11.2411
HSBECLIN1_FL	373	396	LDCVQQFKEEVEKGETRFCLPYRM			21	2947.4	ComplexII_solo	300			6.459	0.109	11.2327
HSBECLIN1_FL	373	396	LDCVQQFKEEVEKGETRFCLPYRM			21	2947.4	ComplexII_solo	3000			6.742	0.511	11.198
HSBECLIN1_FL	374	380	DCVQQFK			5	866.396	ComplexII_rab5	0			0	0	4.9892
HSBECLIN1_FL	374	380	DCVQQFK			5	866.396	ComplexII_rab5	0.3			0.323	0.018	4.9602
HSBECLIN1_FL	374	380	DCVQQFK			5	866.396	ComplexII_rab5	3			0.412	0.006	4.986
HSBECLIN1_FL	374	380	DCVQQFK			5	866.396	ComplexII_rab5	30			0.447	0.031	4.965
HSBECLIN1_FL	374	380	DCVQQFK			5	866.396	ComplexII_rab5	300			0.827	0.014	4.9812
HSBECLIN1_FL	374	380	DCVQQFK			5	866.396	ComplexII_rab5	3000			1.758	0.032	4.9826
HSBECLIN1_FL	374	380	DCVQQFK			5	866.396	ComplexII_solo	0			0	0	5.0011
HSBECLIN1_FL	374	380	DCVQQFK			5	866.396	ComplexII_solo	0.3			0.177	0.017	4.9944
HSBECLIN1_FL	374	380	DCVQQFK			5	866.396	ComplexII_solo	3			0.313	0.02	5.0225
HSBECLIN1_FL	374	380	DCVQQFK			5	866.396	ComplexII_solo	30			0.347	0.013	5.0241
HSBECLIN1_FL	374	380	DCVQQFK			5	866.396	ComplexII_solo	300			0.926	0.023	4.9944
HSBECLIN1_FL	374	380	DCVQQFK			5	866.396	ComplexII_solo	3000			1.878	0.041	4.9945
HSBECLIN1_FL	374	390	DCVQQFKEEVEKGETRF			15	2070.97	ComplexII_rab5	0			0	0	10.1294
HSBECLIN1_FL	374	390	DCVQQFKEEVEKGETRF			15	2070.97	ComplexII_rab5	0.3			1.579	0.148	10.0839
HSBECLIN1_FL	374	390	DCVQQFKEEVEKGETRF			15	2070.97	ComplexII_rab5	3			2.326	0.2	10.1093
HSBECLIN1_FL	374	390	DCVQQFKEEVEKGETRF			15	2070.97	ComplexII_rab5	30			2.809	0.069	10.0945
HSBECLIN1_FL	374	390	DCVQQFKEEVEKGETRF			15	2070.97	ComplexII_rab5	300			3.464	0.05	10.0582
HSBECLIN1_FL	374	390	DCVQQFKEEVEKGETRF			15	2070.97	ComplexII_rab5	3000			3.709	0.044	10.0799
HSBECLIN1_FL	374	390	DCVQQFKEEVEKGETRF			15	2070.97	ComplexII_solo	0			0	0	10.139
HSBECLIN1_FL	374	390	DCVQQFKEEVEKGETRF			15	2070.97	ComplexII_solo	0.3			1.36	0.067	10.0682
HSBECLIN1_FL	374	390	DCVQQFKEEVEKGETRF			15	2070.97	ComplexII_solo	3			2.458	0.189	10.1169
HSBECLIN1_FL	374	390	DCVQQFKEEVEKGETRF			15	2070.97	ComplexII_solo	30			2.818	0.132	10.0824
HSBECLIN1_FL	374	390	DCVQQFKEEVEKGETRF			15	2070.97	ComplexII_solo	300			3.754	0.244	10.0617
HSBECLIN1_FL	374	390	DCVQQFKEEVEKGETRF			15	2070.97	ComplexII_solo	3000			3.813	0.277	10.0645
HSBECLIN1_FL	379	390	FKEEVEKGETRF			10	1497.75	ComplexII_rab5	0			0	0	6.5331
HSBECLIN1_FL	379	390	FKEEVEKGETRF			10	1497.75	ComplexII_rab5	0.3			1.403	0.146	6.4955
HSBECLIN1_FL	379	390	FKEEVEKGETRF			10	1497.75	ComplexII_rab5	3			2.061	0.137	6.5202
HSBECLIN1_FL	379	390	FKEEVEKGETRF			10	1497.75	ComplexII_rab5	30			2.36	0.061	6.497
HSBECLIN1_FL	379	390	FKEEVEKGETRF			10	1497.75	ComplexII_rab5	300			2.958	0.145	6.5044
HSBECLIN1_FL	379	390	FKEEVEKGETRF			10	1497.75	ComplexII_rab5	3000			3.167	0.061	6.4925
HSBECLIN1_FL	379	390	FKEEVEKGETRF			10	1497.75	ComplexII_solo	0			0	0	6.56
HSBECLIN1_FL	379	390	FKEEVEKGETRF			10	1497.75	ComplexII_solo	0.3			1.199	0.039	6.5297
HSBECLIN1_FL	379	390	FKEEVEKGETRF			10	1497.75	ComplexII_solo	3			2.121	0.174	6.5488
HSBECLIN1_FL	379	390	FKEEVEKGETRF			10	1497.75	ComplexII_solo	30			2.405	0.041	6.5308
HSBECLIN1_FL	379	390	FKEEVEKGETRF			10	1497.75	ComplexII_solo	300			3.176	0.219	6.5282
HSBECLIN1_FL	379	390	FKEEVEKGETRF			10	1497.75	ComplexII_solo	3000			3.301	0.247	6.5214
HSBECLIN1_FL	379	396	FKEEVEKGETRFCLPYRM			15	2261.1	ComplexII_rab5	0			0	0	8.9135
HSBECLIN1_FL	379	396	FKEEVEKGETRFCLPYRM			15	2261.1	ComplexII_rab5	0.3			1.86	0.164	8.8551
HSBECLIN1_FL	379	396	FKEEVEKGETRFCLPYRM			15	2261.1	ComplexII_rab5	3			3.38	0.266	8.8831
HSBECLIN1_FL	379	396	FKEEVEKGETRFCLPYRM			15	2261.1	ComplexII_rab5	30			4.45	0.336	8.8639
HSBECLIN1_FL	379	396	FKEEVEKGETRFCLPYRM			15	2261.1	ComplexII_rab5	300			5.419	0.191	8.8434
HSBECLIN1_FL	379	396	FKEEVEKGETRFCLPYRM			15	2261.1	ComplexII_rab5	3000			5.83	0.197	8.8563
HSBECLIN1_FL	379	396	FKEEVEKGETRFCLPYRM			15	2261.1	ComplexII_solo	0			0	0	8.9437
HSBECLIN1_FL	379	396	FKEEVEKGETRFCLPYRM			15	2261.1	ComplexII_solo	0.3			1.435	0.174	8.8858
HSBECLIN1_FL	379	396	FKEEVEKGETRFCLPYRM			15	2261.1	ComplexII_solo	3			3.476	0.268	8.9151
HSBECLIN1_FL	379	396	FKEEVEKGETRFCLPYRM			15	2261.1	ComplexII_solo	30			4.288	0.22	8.8975
HSBECLIN1_FL	379	396	FKEEVEKGETRFCLPYRM			15	2261.1	ComplexII_solo	300			5.521	0.092	8.8737
HSBECLIN1_FL	379	396	FKEEVEKGETRFCLPYRM			15	2261.1	ComplexII_solo	3000			5.568	0.372	8.8425
HSBECLIN1_FL	382	396	EVEKGETRFCLPYRM			12	1856.89	ComplexII_rab5	0			0	0	9.1557
HSBECLIN1_FL	382	396	EVEKGETRFCLPYRM			12	1856.89	ComplexII_rab5	0.3			1.621	0.377	9.1164
HSBECLIN1_FL	382	396	EVEKGETRFCLPYRM			12	1856.89	ComplexII_rab5	3			3.329	0.228	9.1393
HSBECLIN1_FL	382	396	EVEKGETRFCLPYRM			12	1856.89	ComplexII_rab5	30			4.238	0.137	9.127
HSBECLIN1_FL	382	396	EVEKGETRFCLPYRM			12	1856.89	ComplexII_rab5	300			5.07	0.335	9.1117
HSBECLIN1_FL	382	396	EVEKGETRFCLPYRM			12	1856.89	ComplexII_rab5	3000			5.114	0.288	9.1194
HSBECLIN1_FL	382	396	EVEKGETRFCLPYRM			12	1856.89	ComplexII_solo	0			0	0	9.1775
HSBECLIN1_FL	382	396	EVEKGETRFCLPYRM			12	1856.89	ComplexII_solo	0.3			1.218	0.07	9.1157
HSBECLIN1_FL	382	396	EVEKGETRFCLPYRM			12	1856.89	ComplexII_solo	3			3.25	0.236	9.1659
HSBECLIN1_FL	382	396	EVEKGETRFCLPYRM			12	1856.89	ComplexII_solo	30			3.978	0.156	9.1327
HSBECLIN1_FL	382	396	EVEKGETRFCLPYRM			12	1856.89	ComplexII_solo	300			5.055	0.134	9.1367
HSBECLIN1_FL	382	396	EVEKGETRFCLPYRM			12	1856.89	ComplexII_solo	3000			5.036	0.044	9.1249
HSBECLIN1_FL	397	412	DVEKGKIEDTGGSGGS			14	1534.71	ComplexII_rab5	0			0	0	4.8966
HSBECLIN1_FL	397	412	DVEKGKIEDTGGSGGS			14	1534.71	ComplexII_rab5	0.3			1.556	0.211	4.8868
HSBECLIN1_FL	397	412	DVEKGKIEDTGGSGGS			14	1534.71	ComplexII_rab5	3			2.631	0.372	4.8873
HSBECLIN1_FL	397	412	DVEKGKIEDTGGSGGS			14	1534.71	ComplexII_rab5	30			3.258	0.194	4.8776
HSBECLIN1_FL	397	412	DVEKGKIEDTGGSGGS			14	1534.71	ComplexII_rab5	300			3.835	0.197	4.8903
HSBECLIN1_FL	397	412	DVEKGKIEDTGGSGGS			14	1534.71	ComplexII_rab5	3000			4.612	0.103	4.8887
HSBECLIN1_FL	397	412	DVEKGKIEDTGGSGGS			14	1534.71	ComplexII_solo	0			0	0	4.9054
HSBECLIN1_FL	397	412	DVEKGKIEDTGGSGGS			14	1534.71	ComplexII_solo	0.3			1.234	0.145	4.91
HSBECLIN1_FL	397	412	DVEKGKIEDTGGSGGS			14	1534.71	ComplexII_solo	3			2.686	0.242	4.9155
HSBECLIN1_FL	397	412	DVEKGKIEDTGGSGGS			14	1534.71	ComplexII_solo	30			3.098	0.246	4.917
HSBECLIN1_FL	397	412	DVEKGKIEDTGGSGGS			14	1534.71	ComplexII_solo	300			4.064	0.202	4.9137
HSBECLIN1_FL	397	412	DVEKGKIEDTGGSGGS			14	1534.71	ComplexII_solo	3000			4.633	0.467	4.8953
HSBECLIN1_FL	397	413	DVEKGKIEDTGGSGGSY			15	1697.77	ComplexII_rab5	0			0	0	6.0087
HSBECLIN1_FL	397	413	DVEKGKIEDTGGSGGSY			15	1697.77	ComplexII_rab5	0.3			1.42	0.203	5.9799
HSBECLIN1_FL	397	413	DVEKGKIEDTGGSGGSY			15	1697.77	ComplexII_rab5	3			2.395	0.327	5.9893
HSBECLIN1_FL	397	413	DVEKGKIEDTGGSGGSY			15	1697.77	ComplexII_rab5	30			3.046	0.15	5.9778
HSBECLIN1_FL	397	413	DVEKGKIEDTGGSGGSY			15	1697.77	ComplexII_rab5	300			3.726	0.159	5.9651
HSBECLIN1_FL	397	413	DVEKGKIEDTGGSGGSY			15	1697.77	ComplexII_rab5	3000			4.864	0.134	5.986
HSBECLIN1_FL	397	413	DVEKGKIEDTGGSGGSY			15	1697.77	ComplexII_solo	0			0	0	6.0407
HSBECLIN1_FL	397	413	DVEKGKIEDTGGSGGSY			15	1697.77	ComplexII_solo	0.3			1.175	0.147	5.9984
HSBECLIN1_FL	397	413	DVEKGKIEDTGGSGGSY			15	1697.77	ComplexII_solo	3			2.559	0.248	6.0122
HSBECLIN1_FL	397	413	DVEKGKIEDTGGSGGSY			15	1697.77	ComplexII_solo	30			2.953	0.209	5.9877
HSBECLIN1_FL	397	413	DVEKGKIEDTGGSGGSY			15	1697.77	ComplexII_solo	300			4.031	0.226	5.9833
HSBECLIN1_FL	397	413	DVEKGKIEDTGGSGGSY			15	1697.77	ComplexII_solo	3000			4.941	0.443	5.9814
HSBECLIN1_FL	397	419	DVEKGKIEDTGGSGGSYSIKTQF			21	2402.16	ComplexII_rab5	0			0	0	7.842
HSBECLIN1_FL	397	419	DVEKGKIEDTGGSGGSYSIKTQF			21	2402.16	ComplexII_rab5	0.3			1.757	0.301	7.8273
HSBECLIN1_FL	397	419	DVEKGKIEDTGGSGGSYSIKTQF			21	2402.16	ComplexII_rab5	3			3.514	0.43	7.8517
HSBECLIN1_FL	397	419	DVEKGKIEDTGGSGGSYSIKTQF			21	2402.16	ComplexII_rab5	30			4.4	0.183	7.8184
HSBECLIN1_FL	397	419	DVEKGKIEDTGGSGGSYSIKTQF			21	2402.16	ComplexII_rab5	300			5.411	0.242	7.8135
HSBECLIN1_FL	397	419	DVEKGKIEDTGGSGGSYSIKTQF			21	2402.16	ComplexII_rab5	3000			8.161	0.232	7.8089
HSBECLIN1_FL	397	419	DVEKGKIEDTGGSGGSYSIKTQF			21	2402.16	ComplexII_solo	0			0	0	7.8927
HSBECLIN1_FL	397	419	DVEKGKIEDTGGSGGSYSIKTQF			21	2402.16	ComplexII_solo	0.3			1.453	0.168	7.8527
HSBECLIN1_FL	397	419	DVEKGKIEDTGGSGGSYSIKTQF			21	2402.16	ComplexII_solo	3			3.626	0.307	7.8925
HSBECLIN1_FL	397	419	DVEKGKIEDTGGSGGSYSIKTQF			21	2402.16	ComplexII_solo	30			4.227	0.267	7.8626
HSBECLIN1_FL	397	419	DVEKGKIEDTGGSGGSYSIKTQF			21	2402.16	ComplexII_solo	300			5.666	0.298	7.8703
HSBECLIN1_FL	397	419	DVEKGKIEDTGGSGGSYSIKTQF			21	2402.16	ComplexII_solo	3000			8.155	0.75	7.8338
HSBECLIN1_FL	413	419	YSIKTQF			5	885.46	ComplexII_rab5	0			0	0	8.319
HSBECLIN1_FL	413	419	YSIKTQF			5	885.46	ComplexII_rab5	0.3			0.232	0.02	8.2789
HSBECLIN1_FL	413	419	YSIKTQF			5	885.46	ComplexII_rab5	3			0.652	0.071	8.3069
HSBECLIN1_FL	413	419	YSIKTQF			5	885.46	ComplexII_rab5	30			0.753	0.043	8.2876
HSBECLIN1_FL	413	419	YSIKTQF			5	885.46	ComplexII_rab5	300			1.059	0.009	8.2914
HSBECLIN1_FL	413	419	YSIKTQF			5	885.46	ComplexII_rab5	3000			2.538	0.049	8.2886
HSBECLIN1_FL	413	419	YSIKTQF			5	885.46	ComplexII_solo	0			0	0	8.3512
HSBECLIN1_FL	413	419	YSIKTQF			5	885.46	ComplexII_solo	0.3			0.225	0.021	8.327
HSBECLIN1_FL	413	419	YSIKTQF			5	885.46	ComplexII_solo	3			0.699	0.076	8.3598
HSBECLIN1_FL	413	419	YSIKTQF			5	885.46	ComplexII_solo	30			0.755	0.016	8.3386
HSBECLIN1_FL	413	419	YSIKTQF			5	885.46	ComplexII_solo	300			1.121	0.06	8.3289
HSBECLIN1_FL	413	419	YSIKTQF			5	885.46	ComplexII_solo	3000			2.605	0.183	8.3327
HSBECLIN1_FL	420	431	NSEEQWTKALKF			10	1479.74	ComplexII_rab5	0			0	0	9.9944
HSBECLIN1_FL	420	431	NSEEQWTKALKF			10	1479.74	ComplexII_rab5	0.3			0.102	0.05	9.9541
HSBECLIN1_FL	420	431	NSEEQWTKALKF			10	1479.74	ComplexII_rab5	3			0.381	0.045	9.9664
HSBECLIN1_FL	420	431	NSEEQWTKALKF			10	1479.74	ComplexII_rab5	30			0.73	0.044	9.9546
HSBECLIN1_FL	420	431	NSEEQWTKALKF			10	1479.74	ComplexII_rab5	300			1.09	0.025	9.9327
HSBECLIN1_FL	420	431	NSEEQWTKALKF			10	1479.74	ComplexII_rab5	3000			1.143	0.039	9.9504
HSBECLIN1_FL	420	431	NSEEQWTKALKF			10	1479.74	ComplexII_solo	0			0	0	10.0145
HSBECLIN1_FL	420	431	NSEEQWTKALKF			10	1479.74	ComplexII_solo	0.3			0.091	0.02	9.9733
HSBECLIN1_FL	420	431	NSEEQWTKALKF			10	1479.74	ComplexII_solo	3			0.479	0.02	10.0186
HSBECLIN1_FL	420	431	NSEEQWTKALKF			10	1479.74	ComplexII_solo	30			0.776	0.017	9.9892
HSBECLIN1_FL	420	431	NSEEQWTKALKF			10	1479.74	ComplexII_solo	300			1.181	0.039	9.9672
HSBECLIN1_FL	420	431	NSEEQWTKALKF			10	1479.74	ComplexII_solo	3000			1.148	0.073	9.9618
HSBECLIN1_FL	426	441	TKALKFMLTNLKWGLA			14	1834.05	ComplexII_rab5	0			0	0	8.4596
HSBECLIN1_FL	426	441	TKALKFMLTNLKWGLA			14	1834.05	ComplexII_rab5	0.3			0.267	0.034	8.4378
HSBECLIN1_FL	426	441	TKALKFMLTNLKWGLA			14	1834.05	ComplexII_rab5	3			0.957	0.112	8.4623
HSBECLIN1_FL	426	441	TKALKFMLTNLKWGLA			14	1834.05	ComplexII_rab5	30			2.215	0.067	8.4395
HSBECLIN1_FL	426	441	TKALKFMLTNLKWGLA			14	1834.05	ComplexII_rab5	300			3.87	0.093	8.4258
HSBECLIN1_FL	426	441	TKALKFMLTNLKWGLA			14	1834.05	ComplexII_rab5	3000			5.254	0.055	8.437
HSBECLIN1_FL	426	441	TKALKFMLTNLKWGLA			14	1834.05	ComplexII_solo	0			0	0	8.5057
HSBECLIN1_FL	426	441	TKALKFMLTNLKWGLA			14	1834.05	ComplexII_solo	0.3			0.28	0.054	8.4509
HSBECLIN1_FL	426	441	TKALKFMLTNLKWGLA			14	1834.05	ComplexII_solo	3			1.115	0.05	8.4907
HSBECLIN1_FL	426	441	TKALKFMLTNLKWGLA			14	1834.05	ComplexII_solo	30			2.338	0.088	8.4732
HSBECLIN1_FL	426	441	TKALKFMLTNLKWGLA			14	1834.05	ComplexII_solo	300			4.111	0.108	8.4424
HSBECLIN1_FL	426	441	TKALKFMLTNLKWGLA			14	1834.05	ComplexII_solo	3000			5.354	0.366	8.4322
HSBECLIN1_FL	432	441	MLTNLKWGLA			8	1145.63	ComplexII_rab5	0			0	0	10.7736
HSBECLIN1_FL	432	441	MLTNLKWGLA			8	1145.63	ComplexII_rab5	0.3			0.122	0.015	10.7365
HSBECLIN1_FL	432	441	MLTNLKWGLA			8	1145.63	ComplexII_rab5	3			0.185	0.031	10.7343
HSBECLIN1_FL	432	441	MLTNLKWGLA			8	1145.63	ComplexII_rab5	30			0.522	0.006	10.7122
HSBECLIN1_FL	432	441	MLTNLKWGLA			8	1145.63	ComplexII_rab5	300			0.676	0.012	10.7232
HSBECLIN1_FL	432	441	MLTNLKWGLA			8	1145.63	ComplexII_rab5	3000			0.744	0.01	10.7395
HSBECLIN1_FL	432	441	MLTNLKWGLA			8	1145.63	ComplexII_solo	0			0	0	10.8009
HSBECLIN1_FL	432	441	MLTNLKWGLA			8	1145.63	ComplexII_solo	0.3			0.105	0.011	10.7242
HSBECLIN1_FL	432	441	MLTNLKWGLA			8	1145.63	ComplexII_solo	3			0.191	0.039	10.7681
HSBECLIN1_FL	432	441	MLTNLKWGLA			8	1145.63	ComplexII_solo	30			0.521	0.011	10.7441
HSBECLIN1_FL	432	441	MLTNLKWGLA			8	1145.63	ComplexII_solo	300			0.69	0.022	10.7235
HSBECLIN1_FL	432	441	MLTNLKWGLA			8	1145.63	ComplexII_solo	3000			0.729	0.062	10.7498
HSBECLIN1_FL	441	447	AWVSSQF			5	823.386	ComplexII_rab5	0			0	0	10.0909
HSBECLIN1_FL	441	447	AWVSSQF			5	823.386	ComplexII_rab5	0.3			0.963	0.112	10.0717
HSBECLIN1_FL	441	447	AWVSSQF			5	823.386	ComplexII_rab5	3			1.776	0.095	10.0814
HSBECLIN1_FL	441	447	AWVSSQF			5	823.386	ComplexII_rab5	30			2.429	0.067	10.084
HSBECLIN1_FL	441	447	AWVSSQF			5	823.386	ComplexII_rab5	300			2.778	0.011	10.0621
HSBECLIN1_FL	441	447	AWVSSQF			5	823.386	ComplexII_rab5	3000			3.346	0.05	10.0694
HSBECLIN1_FL	441	447	AWVSSQF			5	823.386	ComplexII_solo	0			0	0	10.1006
HSBECLIN1_FL	441	447	AWVSSQF			5	823.386	ComplexII_solo	0.3			0.864	0.051	10.0615
HSBECLIN1_FL	441	447	AWVSSQF			5	823.386	ComplexII_solo	3			1.868	0.078	10.1082
HSBECLIN1_FL	441	447	AWVSSQF			5	823.386	ComplexII_solo	30			2.485	0.095	10.0932
HSBECLIN1_FL	441	447	AWVSSQF			5	823.386	ComplexII_solo	300			2.926	0.06	10.0638
HSBECLIN1_FL	441	447	AWVSSQF			5	823.386	ComplexII_solo	3000			3.362	0.198	10.0505
Protein	Start	End	Sequence	Modification	Fragment	MaxUptake	Peptide mass	State	Exposure	Center	Center SD	Uptake	Uptake SD	RT
HSUVRAG_FL	11	19	VPQPPPGPA			3	858.46	ComplexII_rab5	0			0	0	9.6184
HSUVRAG_FL	11	19	VPQPPPGPA			3	858.46	ComplexII_rab5	0.3			0.055	0.044	9.6002
HSUVRAG_FL	11	19	VPQPPPGPA			3	858.46	ComplexII_rab5	3			0.029	0.024	9.6141
HSUVRAG_FL	11	19	VPQPPPGPA			3	858.46	ComplexII_rab5	30			0.083	0.032	9.6037
HSUVRAG_FL	11	19	VPQPPPGPA			3	858.46	ComplexII_rab5	300			0.056	0.044	9.5903
HSUVRAG_FL	11	19	VPQPPPGPA			3	858.46	ComplexII_rab5	3000			0.139	0.05	9.5786
HSUVRAG_FL	11	19	VPQPPPGPA			3	858.46	ComplexII_solo	0			0	0	9.6279
HSUVRAG_FL	11	19	VPQPPPGPA			3	858.46	ComplexII_solo	0.3			0.003	0.018	9.5981
HSUVRAG_FL	11	19	VPQPPPGPA			3	858.46	ComplexII_solo	3			0.03	0.032	9.6408
HSUVRAG_FL	11	19	VPQPPPGPA			3	858.46	ComplexII_solo	30			0.052	0.007	9.6149
HSUVRAG_FL	11	19	VPQPPPGPA			3	858.46	ComplexII_solo	300			0.056	0.034	9.6011
HSUVRAG_FL	11	19	VPQPPPGPA			3	858.46	ComplexII_solo	3000			0.074	0.05	9.5858
HSUVRAG_FL	15	25	PPGPAAALPPG			6	943.513	ComplexII_rab5	0			0	0	8.5347
HSUVRAG_FL	15	25	PPGPAAALPPG			6	943.513	ComplexII_rab5	0.3			0.006	0.005	8.5059
HSUVRAG_FL	15	25	PPGPAAALPPG			6	943.513	ComplexII_rab5	3			0.037	0.013	8.5496
HSUVRAG_FL	15	25	PPGPAAALPPG			6	943.513	ComplexII_rab5	30			0.025	0.015	8.5216
HSUVRAG_FL	15	25	PPGPAAALPPG			6	943.513	ComplexII_rab5	300			0.027	0.022	8.5149
HSUVRAG_FL	15	25	PPGPAAALPPG			6	943.513	ComplexII_rab5	3000			0.079	0.006	8.5382
HSUVRAG_FL	15	25	PPGPAAALPPG			6	943.513	ComplexII_solo	0			0	0	8.5773
HSUVRAG_FL	15	25	PPGPAAALPPG			6	943.513	ComplexII_solo	0.3			0.008	0.015	8.5435
HSUVRAG_FL	15	25	PPGPAAALPPG			6	943.513	ComplexII_solo	3			0.018	0.006	8.5955
HSUVRAG_FL	15	25	PPGPAAALPPG			6	943.513	ComplexII_solo	30			0.027	0.004	8.5709
HSUVRAG_FL	15	25	PPGPAAALPPG			6	943.513	ComplexII_solo	300			0.025	0.011	8.5576
HSUVRAG_FL	15	25	PPGPAAALPPG			6	943.513	ComplexII_solo	3000			0.05	0.01	8.5352
HSUVRAG_FL	28	50	ARALHVELPSQQRRLRHLRNIAA			20	2704.56	ComplexII_rab5	0			0	0	6.5733
HSUVRAG_FL	28	50	ARALHVELPSQQRRLRHLRNIAA			20	2704.56	ComplexII_rab5	0.3			1.341	0.16	6.5584
HSUVRAG_FL	28	50	ARALHVELPSQQRRLRHLRNIAA			20	2704.56	ComplexII_rab5	3			2.467	0.14	6.5866
HSUVRAG_FL	28	50	ARALHVELPSQQRRLRHLRNIAA			20	2704.56	ComplexII_rab5	30			3.465	0.066	6.5633
HSUVRAG_FL	28	50	ARALHVELPSQQRRLRHLRNIAA			20	2704.56	ComplexII_rab5	300			4.283	0.091	6.5586
HSUVRAG_FL	28	50	ARALHVELPSQQRRLRHLRNIAA			20	2704.56	ComplexII_rab5	3000			5.435	0.058	6.5519
HSUVRAG_FL	28	50	ARALHVELPSQQRRLRHLRNIAA			20	2704.56	ComplexII_solo	0			0	0	6.6124
HSUVRAG_FL	28	50	ARALHVELPSQQRRLRHLRNIAA			20	2704.56	ComplexII_solo	0.3			1.082	0.058	6.6031
HSUVRAG_FL	28	50	ARALHVELPSQQRRLRHLRNIAA			20	2704.56	ComplexII_solo	3			2.569	0.113	6.6186
HSUVRAG_FL	28	50	ARALHVELPSQQRRLRHLRNIAA			20	2704.56	ComplexII_solo	30			3.644	0.131	6.6076
HSUVRAG_FL	28	50	ARALHVELPSQQRRLRHLRNIAA			20	2704.56	ComplexII_solo	300			4.643	0.154	6.5963
HSUVRAG_FL	28	50	ARALHVELPSQQRRLRHLRNIAA			20	2704.56	ComplexII_solo	3000			5.619	0.372	6.5703
HSUVRAG_FL	28	52	ARALHVELPSQQRRLRHLRNIAARN			22	2974.7	ComplexII_rab5	0			0	0	6.4406
HSUVRAG_FL	28	52	ARALHVELPSQQRRLRHLRNIAARN			22	2974.7	ComplexII_rab5	0.3			1.136	0.142	6.3803
HSUVRAG_FL	28	52	ARALHVELPSQQRRLRHLRNIAARN			22	2974.7	ComplexII_rab5	3			2.34	0.204	6.4155
HSUVRAG_FL	28	52	ARALHVELPSQQRRLRHLRNIAARN			22	2974.7	ComplexII_rab5	30			3.494	0.086	6.4009
HSUVRAG_FL	28	52	ARALHVELPSQQRRLRHLRNIAARN			22	2974.7	ComplexII_rab5	300			4.181	0.104	6.4189
HSUVRAG_FL	28	52	ARALHVELPSQQRRLRHLRNIAARN			22	2974.7	ComplexII_rab5	3000			5.562	0.051	6.3878
HSUVRAG_FL	28	52	ARALHVELPSQQRRLRHLRNIAARN			22	2974.7	ComplexII_solo	0			0	0	6.4831
HSUVRAG_FL	28	52	ARALHVELPSQQRRLRHLRNIAARN			22	2974.7	ComplexII_solo	0.3			1.054	0.101	6.4616
HSUVRAG_FL	28	52	ARALHVELPSQQRRLRHLRNIAARN			22	2974.7	ComplexII_solo	3			2.622	0.131	6.4807
HSUVRAG_FL	28	52	ARALHVELPSQQRRLRHLRNIAARN			22	2974.7	ComplexII_solo	30			3.734	0.128	6.454
HSUVRAG_FL	28	52	ARALHVELPSQQRRLRHLRNIAARN			22	2974.7	ComplexII_solo	300			4.688	0.126	6.4392
HSUVRAG_FL	28	52	ARALHVELPSQQRRLRHLRNIAARN			22	2974.7	ComplexII_solo	3000			5.878	0.442	6.4272
HSUVRAG_FL	29	49	RALHVELPSQQRRLRHLRNIA			18	2562.48	ComplexII_rab5	0			0	0	6.5506
HSUVRAG_FL	29	49	RALHVELPSQQRRLRHLRNIA			18	2562.48	ComplexII_rab5	0.3			1.243	0.257	6.5514
HSUVRAG_FL	29	49	RALHVELPSQQRRLRHLRNIA			18	2562.48	ComplexII_rab5	3			2.339	0.253	6.5586
HSUVRAG_FL	29	49	RALHVELPSQQRRLRHLRNIA			18	2562.48	ComplexII_rab5	30			3.058	0.121	6.5249
HSUVRAG_FL	29	49	RALHVELPSQQRRLRHLRNIA			18	2562.48	ComplexII_rab5	300			3.579	0.121	6.5289
HSUVRAG_FL	29	49	RALHVELPSQQRRLRHLRNIA			18	2562.48	ComplexII_rab5	3000			4.657	0.116	6.1427
HSUVRAG_FL	29	49	RALHVELPSQQRRLRHLRNIA			18	2562.48	ComplexII_solo	0			0	0	6.5687
HSUVRAG_FL	29	49	RALHVELPSQQRRLRHLRNIA			18	2562.48	ComplexII_solo	0.3			0.98	0.187	6.5734
HSUVRAG_FL	29	49	RALHVELPSQQRRLRHLRNIA			18	2562.48	ComplexII_solo	3			2.209	0.063	6.5837
HSUVRAG_FL	29	49	RALHVELPSQQRRLRHLRNIA			18	2562.48	ComplexII_solo	30			3.175	0.099	6.5709
HSUVRAG_FL	29	49	RALHVELPSQQRRLRHLRNIA			18	2562.48	ComplexII_solo	300			4.063	0.178	6.5614
HSUVRAG_FL	29	49	RALHVELPSQQRRLRHLRNIA			18	2562.48	ComplexII_solo	3000			5.012	0.368	6.1573
HSUVRAG_FL	32	52	HVELPSQQRRLRHLRNIAARN			18	2563.44	ComplexII_rab5	0			0	0	5.9725
HSUVRAG_FL	32	52	HVELPSQQRRLRHLRNIAARN			18	2563.44	ComplexII_rab5	0.3			0.193	0.019	5.9305
HSUVRAG_FL	32	52	HVELPSQQRRLRHLRNIAARN			18	2563.44	ComplexII_rab5	3			0.768	0.076	5.9481
HSUVRAG_FL	32	52	HVELPSQQRRLRHLRNIAARN			18	2563.44	ComplexII_rab5	30			1.687	0.083	5.9353
HSUVRAG_FL	32	52	HVELPSQQRRLRHLRNIAARN			18	2563.44	ComplexII_rab5	300			2.396	0.037	5.927
HSUVRAG_FL	32	52	HVELPSQQRRLRHLRNIAARN			18	2563.44	ComplexII_rab5	3000			3.862	0.009	5.9357
HSUVRAG_FL	32	52	HVELPSQQRRLRHLRNIAARN			18	2563.44	ComplexII_solo	0			0	0	6.0005
HSUVRAG_FL	32	52	HVELPSQQRRLRHLRNIAARN			18	2563.44	ComplexII_solo	0.3			0.213	0.074	5.9712
HSUVRAG_FL	32	52	HVELPSQQRRLRHLRNIAARN			18	2563.44	ComplexII_solo	3			1.059	0.231	5.9471
HSUVRAG_FL	32	52	HVELPSQQRRLRHLRNIAARN			18	2563.44	ComplexII_solo	30			1.894	0.062	5.9566
HSUVRAG_FL	32	52	HVELPSQQRRLRHLRNIAARN			18	2563.44	ComplexII_solo	300			2.711	0.083	6.0231
HSUVRAG_FL	32	52	HVELPSQQRRLRHLRNIAARN			18	2563.44	ComplexII_solo	3000			3.985	0.387	5.9197
HSUVRAG_FL	36	52	PSQQRRLRHLRNIAARN			15	2085.19	ComplexII_rab5	0			0	0	5.0014
HSUVRAG_FL	36	52	PSQQRRLRHLRNIAARN			15	2085.19	ComplexII_rab5	0.3			0.047	0.013	4.9528
HSUVRAG_FL	36	52	PSQQRRLRHLRNIAARN			15	2085.19	ComplexII_rab5	3			0.196	0.019	4.9742
HSUVRAG_FL	36	52	PSQQRRLRHLRNIAARN			15	2085.19	ComplexII_rab5	30			0.572	0.051	4.9558
HSUVRAG_FL	36	52	PSQQRRLRHLRNIAARN			15	2085.19	ComplexII_rab5	300			1.131	0.015	4.9305
HSUVRAG_FL	36	52	PSQQRRLRHLRNIAARN			15	2085.19	ComplexII_rab5	3000			2.434	0.034	4.939
HSUVRAG_FL	36	52	PSQQRRLRHLRNIAARN			15	2085.19	ComplexII_solo	0			0	0	5.0258
HSUVRAG_FL	36	52	PSQQRRLRHLRNIAARN			15	2085.19	ComplexII_solo	0.3			0.051	0.029	5.0171
HSUVRAG_FL	36	52	PSQQRRLRHLRNIAARN			15	2085.19	ComplexII_solo	3			0.237	0.027	5.0571
HSUVRAG_FL	36	52	PSQQRRLRHLRNIAARN			15	2085.19	ComplexII_solo	30			0.686	0.026	5.0276
HSUVRAG_FL	36	52	PSQQRRLRHLRNIAARN			15	2085.19	ComplexII_solo	300			1.204	0.007	5.026
HSUVRAG_FL	36	52	PSQQRRLRHLRNIAARN			15	2085.19	ComplexII_solo	3000			2.524	0.155	5.0042
HSUVRAG_FL	47	55	NIAARNIVN			7	983.551	ComplexII_rab5	0			0	0	5.0985
HSUVRAG_FL	47	55	NIAARNIVN			7	983.551	ComplexII_rab5	0.3			0.009	0.011	5.0817
HSUVRAG_FL	47	55	NIAARNIVN			7	983.551	ComplexII_rab5	3			0.133	0.051	5.1014
HSUVRAG_FL	47	55	NIAARNIVN			7	983.551	ComplexII_rab5	30			0.589	0.023	5.0726
HSUVRAG_FL	47	55	NIAARNIVN			7	983.551	ComplexII_rab5	300			0.76	0.03	5.0784
HSUVRAG_FL	47	55	NIAARNIVN			7	983.551	ComplexII_rab5	3000			0.782	0.015	5.0751
HSUVRAG_FL	47	55	NIAARNIVN			7	983.551	ComplexII_solo	0			0	0	5.1252
HSUVRAG_FL	47	55	NIAARNIVN			7	983.551	ComplexII_solo	0.3			0.002	0.026	5.0962
HSUVRAG_FL	47	55	NIAARNIVN			7	983.551	ComplexII_solo	3			0.219	0.038	5.1335
HSUVRAG_FL	47	55	NIAARNIVN			7	983.551	ComplexII_solo	30			0.699	0.102	5.1005
HSUVRAG_FL	47	55	NIAARNIVN			7	983.551	ComplexII_solo	300			0.763	0.027	5.0968
HSUVRAG_FL	47	55	NIAARNIVN			7	983.551	ComplexII_solo	3000			0.745	0.033	5.0869
HSUVRAG_FL	50	64	ARNIVNRNGHQLLDT			13	1719.91	ComplexII_rab5	0			0	0	6.4493
HSUVRAG_FL	50	64	ARNIVNRNGHQLLDT			13	1719.91	ComplexII_rab5	0.3			1.139	0.113	6.4361
HSUVRAG_FL	50	64	ARNIVNRNGHQLLDT			13	1719.91	ComplexII_rab5	3			2.106	0.207	6.4486
HSUVRAG_FL	50	64	ARNIVNRNGHQLLDT			13	1719.91	ComplexII_rab5	30			2.389	0.095	6.4428
HSUVRAG_FL	50	64	ARNIVNRNGHQLLDT			13	1719.91	ComplexII_rab5	300			2.567	0.037	6.4398
HSUVRAG_FL	50	64	ARNIVNRNGHQLLDT			13	1719.91	ComplexII_rab5	3000			2.729	0.012	6.4454
HSUVRAG_FL	50	64	ARNIVNRNGHQLLDT			13	1719.91	ComplexII_solo	0			0	0	6.5006
HSUVRAG_FL	50	64	ARNIVNRNGHQLLDT			13	1719.91	ComplexII_solo	0.3			1.02	0.136	6.4599
HSUVRAG_FL	50	64	ARNIVNRNGHQLLDT			13	1719.91	ComplexII_solo	3			2.246	0.185	6.4912
HSUVRAG_FL	50	64	ARNIVNRNGHQLLDT			13	1719.91	ComplexII_solo	30			2.449	0.162	6.4732
HSUVRAG_FL	50	64	ARNIVNRNGHQLLDT			13	1719.91	ComplexII_solo	300			2.775	0.111	6.4671
HSUVRAG_FL	50	64	ARNIVNRNGHQLLDT			13	1719.91	ComplexII_solo	3000			2.757	0.218	6.4534
HSUVRAG_FL	53	64	IVNRNGHQLLDT			10	1378.73	ComplexII_rab5	0			0	0	6.5261
HSUVRAG_FL	53	64	IVNRNGHQLLDT			10	1378.73	ComplexII_rab5	0.3			1.093	0.135	6.4955
HSUVRAG_FL	53	64	IVNRNGHQLLDT			10	1378.73	ComplexII_rab5	3			1.926	0.227	6.4696
HSUVRAG_FL	53	64	IVNRNGHQLLDT			10	1378.73	ComplexII_rab5	30			2.233	0.087	6.5039
HSUVRAG_FL	53	64	IVNRNGHQLLDT			10	1378.73	ComplexII_rab5	300			2.326	0.073	6.5114
HSUVRAG_FL	53	64	IVNRNGHQLLDT			10	1378.73	ComplexII_rab5	3000			2.441	0.061	6.5135
HSUVRAG_FL	53	64	IVNRNGHQLLDT			10	1378.73	ComplexII_solo	0			0	0	6.5739
HSUVRAG_FL	53	64	IVNRNGHQLLDT			10	1378.73	ComplexII_solo	0.3			0.95	0.11	6.5524
HSUVRAG_FL	53	64	IVNRNGHQLLDT			10	1378.73	ComplexII_solo	3			2.095	0.161	6.5819
HSUVRAG_FL	53	64	IVNRNGHQLLDT			10	1378.73	ComplexII_solo	30			2.249	0.108	6.5657
HSUVRAG_FL	53	64	IVNRNGHQLLDT			10	1378.73	ComplexII_solo	300			2.581	0.113	6.5456
HSUVRAG_FL	53	64	IVNRNGHQLLDT			10	1378.73	ComplexII_solo	3000			2.531	0.23	6.5424
HSUVRAG_FL	53	65	IVNRNGHQLLDTY			11	1541.8	ComplexII_rab5	0			0	0	7.6386
HSUVRAG_FL	53	65	IVNRNGHQLLDTY			11	1541.8	ComplexII_rab5	0.3			0.975	0.126	7.6195
HSUVRAG_FL	53	65	IVNRNGHQLLDTY			11	1541.8	ComplexII_rab5	3			1.732	0.159	7.644
HSUVRAG_FL	53	65	IVNRNGHQLLDTY			11	1541.8	ComplexII_rab5	30			1.956	0.054	7.6227
HSUVRAG_FL	53	65	IVNRNGHQLLDTY			11	1541.8	ComplexII_rab5	300			2.083	0.086	7.6249
HSUVRAG_FL	53	65	IVNRNGHQLLDTY			11	1541.8	ComplexII_rab5	3000			2.195	0.1	7.6185
HSUVRAG_FL	53	65	IVNRNGHQLLDTY			11	1541.8	ComplexII_solo	0			0	0	7.6918
HSUVRAG_FL	53	65	IVNRNGHQLLDTY			11	1541.8	ComplexII_solo	0.3			0.818	0.114	7.6623
HSUVRAG_FL	53	65	IVNRNGHQLLDTY			11	1541.8	ComplexII_solo	3			1.833	0.144	7.7039
HSUVRAG_FL	53	65	IVNRNGHQLLDTY			11	1541.8	ComplexII_solo	30			1.977	0.096	7.6828
HSUVRAG_FL	53	65	IVNRNGHQLLDTY			11	1541.8	ComplexII_solo	300			2.276	0.167	7.6747
HSUVRAG_FL	53	65	IVNRNGHQLLDTY			11	1541.8	ComplexII_solo	3000			2.231	0.186	7.6522
HSUVRAG_FL	53	66	IVNRNGHQLLDTYF			12	1688.86	ComplexII_rab5	0			0	0	10.2335
HSUVRAG_FL	53	66	IVNRNGHQLLDTYF			12	1688.86	ComplexII_rab5	0.3			1.129	0.069	9.7902
HSUVRAG_FL	53	66	IVNRNGHQLLDTYF			12	1688.86	ComplexII_rab5	3			1.133	0.123	9.942
HSUVRAG_FL	53	66	IVNRNGHQLLDTYF			12	1688.86	ComplexII_rab5	30			1.89	0.105	9.9319
HSUVRAG_FL	53	66	IVNRNGHQLLDTYF			12	1688.86	ComplexII_rab5	300			1.798	0.166	9.9135
HSUVRAG_FL	53	66	IVNRNGHQLLDTYF			12	1688.86	ComplexII_rab5	3000			2.203	0.09	9.8897
HSUVRAG_FL	53	66	IVNRNGHQLLDTYF			12	1688.86	ComplexII_solo	0			0	0	10.1324
HSUVRAG_FL	53	66	IVNRNGHQLLDTYF			12	1688.86	ComplexII_solo	0.3			1.129	0.064	9.9255
HSUVRAG_FL	53	66	IVNRNGHQLLDTYF			12	1688.86	ComplexII_solo	3			1.409	0.125	9.9377
HSUVRAG_FL	53	66	IVNRNGHQLLDTYF			12	1688.86	ComplexII_solo	30			1.724	0.203	9.9739
HSUVRAG_FL	53	66	IVNRNGHQLLDTYF			12	1688.86	ComplexII_solo	300			2.041	0.183	9.9365
HSUVRAG_FL	53	66	IVNRNGHQLLDTYF			12	1688.86	ComplexII_solo	3000			2.233	0.328	9.9311
HSUVRAG_FL	71	80	CSTEKIYKEF			8	1246.59	ComplexII_rab5	0			0	0	7.8979
HSUVRAG_FL	71	80	CSTEKIYKEF			8	1246.59	ComplexII_rab5	0.3			0.957	0.096	7.8675
HSUVRAG_FL	71	80	CSTEKIYKEF			8	1246.59	ComplexII_rab5	3			2.936	0.148	7.8902
HSUVRAG_FL	71	80	CSTEKIYKEF			8	1246.59	ComplexII_rab5	30			3.916	0.057	7.8516
HSUVRAG_FL	71	80	CSTEKIYKEF			8	1246.59	ComplexII_rab5	300			4.201	0.034	7.8502
HSUVRAG_FL	71	80	CSTEKIYKEF			8	1246.59	ComplexII_rab5	3000			4.278	0.07	7.8717
HSUVRAG_FL	71	80	CSTEKIYKEF			8	1246.59	ComplexII_solo	0			0	0	7.9319
HSUVRAG_FL	71	80	CSTEKIYKEF			8	1246.59	ComplexII_solo	0.3			0.814	0.128	7.9138
HSUVRAG_FL	71	80	CSTEKIYKEF			8	1246.59	ComplexII_solo	3			3.214	0.093	7.9134
HSUVRAG_FL	71	80	CSTEKIYKEF			8	1246.59	ComplexII_solo	30			4.144	0.1	7.8901
HSUVRAG_FL	71	80	CSTEKIYKEF			8	1246.59	ComplexII_solo	300			4.433	0.081	7.9069
HSUVRAG_FL	71	80	CSTEKIYKEF			8	1246.59	ComplexII_solo	3000			4.325	0.114	7.9194
HSUVRAG_FL	80	94	FYRSEVIKNSLNPTW			12	1852.95	ComplexII_rab5	0			0	0	9.2658
HSUVRAG_FL	80	94	FYRSEVIKNSLNPTW			12	1852.95	ComplexII_rab5	0.3			0.215	0.066	9.2229
HSUVRAG_FL	80	94	FYRSEVIKNSLNPTW			12	1852.95	ComplexII_rab5	3			0.583	0.139	9.2615
HSUVRAG_FL	80	94	FYRSEVIKNSLNPTW			12	1852.95	ComplexII_rab5	30			1.424	0.098	9.2318
HSUVRAG_FL	80	94	FYRSEVIKNSLNPTW			12	1852.95	ComplexII_rab5	300			2.495	0.115	9.2514
HSUVRAG_FL	80	94	FYRSEVIKNSLNPTW			12	1852.95	ComplexII_rab5	3000			3.738	0.163	9.2364
HSUVRAG_FL	80	94	FYRSEVIKNSLNPTW			12	1852.95	ComplexII_solo	0			0	0	9.284
HSUVRAG_FL	80	94	FYRSEVIKNSLNPTW			12	1852.95	ComplexII_solo	0.3			0.066	0.003	9.2521
HSUVRAG_FL	80	94	FYRSEVIKNSLNPTW			12	1852.95	ComplexII_solo	3			0.544	0.19	9.3248
HSUVRAG_FL	80	94	FYRSEVIKNSLNPTW			12	1852.95	ComplexII_solo	30			1.462	0.182	9.283
HSUVRAG_FL	80	94	FYRSEVIKNSLNPTW			12	1852.95	ComplexII_solo	300			2.522	0.081	9.2502
HSUVRAG_FL	80	94	FYRSEVIKNSLNPTW			12	1852.95	ComplexII_solo	3000			3.8	0.258	9.2349
HSUVRAG_FL	80	98	FYRSEVIKNSLNPTWRSLD			16	2324.19	ComplexII_rab5	0			0	0	8.8908
HSUVRAG_FL	80	98	FYRSEVIKNSLNPTWRSLD			16	2324.19	ComplexII_rab5	0.3			0.415	0.047	8.8691
HSUVRAG_FL	80	98	FYRSEVIKNSLNPTWRSLD			16	2324.19	ComplexII_rab5	3			1.351	0.187	8.8674
HSUVRAG_FL	80	98	FYRSEVIKNSLNPTWRSLD			16	2324.19	ComplexII_rab5	30			2.77	0.093	8.8797
HSUVRAG_FL	80	98	FYRSEVIKNSLNPTWRSLD			16	2324.19	ComplexII_rab5	300			4.591	0.079	8.8452
HSUVRAG_FL	80	98	FYRSEVIKNSLNPTWRSLD			16	2324.19	ComplexII_rab5	3000			5.926	0.003	8.8615
HSUVRAG_FL	80	98	FYRSEVIKNSLNPTWRSLD			16	2324.19	ComplexII_solo	0			0	0	8.9276
HSUVRAG_FL	80	98	FYRSEVIKNSLNPTWRSLD			16	2324.19	ComplexII_solo	0.3			0.345	0.053	8.8806
HSUVRAG_FL	80	98	FYRSEVIKNSLNPTWRSLD			16	2324.19	ComplexII_solo	3			1.329	0.085	8.9356
HSUVRAG_FL	80	98	FYRSEVIKNSLNPTWRSLD			16	2324.19	ComplexII_solo	30			2.856	0.095	8.8954
HSUVRAG_FL	80	98	FYRSEVIKNSLNPTWRSLD			16	2324.19	ComplexII_solo	300			4.941	0.058	8.8806
HSUVRAG_FL	80	98	FYRSEVIKNSLNPTWRSLD			16	2324.19	ComplexII_solo	3000			6.205	0.409	8.8635
HSUVRAG_FL	80	99	FYRSEVIKNSLNPTWRSLDF			17	2471.26	ComplexII_rab5	0			0	0	10.2254
HSUVRAG_FL	80	99	FYRSEVIKNSLNPTWRSLDF			17	2471.26	ComplexII_rab5	0.3			0.547	0.035	10.2057
HSUVRAG_FL	80	99	FYRSEVIKNSLNPTWRSLDF			17	2471.26	ComplexII_rab5	3			1.641	0.154	10.2333
HSUVRAG_FL	80	99	FYRSEVIKNSLNPTWRSLDF			17	2471.26	ComplexII_rab5	30			3.197	0.159	10.2041
HSUVRAG_FL	80	99	FYRSEVIKNSLNPTWRSLDF			17	2471.26	ComplexII_rab5	300			4.971	0.067	10.2027
HSUVRAG_FL	80	99	FYRSEVIKNSLNPTWRSLDF			17	2471.26	ComplexII_rab5	3000			6.27	0.049	10.2087
HSUVRAG_FL	80	99	FYRSEVIKNSLNPTWRSLDF			17	2471.26	ComplexII_solo	0			0	0	10.2578
HSUVRAG_FL	80	99	FYRSEVIKNSLNPTWRSLDF			17	2471.26	ComplexII_solo	0.3			0.445	0.028	10.2004
HSUVRAG_FL	80	99	FYRSEVIKNSLNPTWRSLDF			17	2471.26	ComplexII_solo	3			1.724	0.103	10.2443
HSUVRAG_FL	80	99	FYRSEVIKNSLNPTWRSLDF			17	2471.26	ComplexII_solo	30			3.184	0.157	10.2342
HSUVRAG_FL	80	99	FYRSEVIKNSLNPTWRSLDF			17	2471.26	ComplexII_solo	300			5.346	0.113	10.2049
HSUVRAG_FL	80	99	FYRSEVIKNSLNPTWRSLDF			17	2471.26	ComplexII_solo	3000			6.678	0.17	10.2505
HSUVRAG_FL	81	94	YRSEVIKNSLNPTW			11	1705.88	ComplexII_rab5	0			0	0	8.7756
HSUVRAG_FL	81	94	YRSEVIKNSLNPTW			11	1705.88	ComplexII_rab5	0.3			0.016	0.011	8.7434
HSUVRAG_FL	81	94	YRSEVIKNSLNPTW			11	1705.88	ComplexII_rab5	3			0.315	0.046	8.7626
HSUVRAG_FL	81	94	YRSEVIKNSLNPTW			11	1705.88	ComplexII_rab5	30			0.903	0.022	8.7661
HSUVRAG_FL	81	94	YRSEVIKNSLNPTW			11	1705.88	ComplexII_rab5	300			1.734	0.01	8.7368
HSUVRAG_FL	81	94	YRSEVIKNSLNPTW			11	1705.88	ComplexII_rab5	3000			2.978	0.029	8.7496
HSUVRAG_FL	81	94	YRSEVIKNSLNPTW			11	1705.88	ComplexII_solo	0			0	0	8.8079
HSUVRAG_FL	81	94	YRSEVIKNSLNPTW			11	1705.88	ComplexII_solo	0.3			0.042	0.017	8.7793
HSUVRAG_FL	81	94	YRSEVIKNSLNPTW			11	1705.88	ComplexII_solo	3			0.343	0.02	8.8068
HSUVRAG_FL	81	94	YRSEVIKNSLNPTW			11	1705.88	ComplexII_solo	30			0.974	0.028	8.7805
HSUVRAG_FL	81	94	YRSEVIKNSLNPTW			11	1705.88	ComplexII_solo	300			1.95	0.071	8.7671
HSUVRAG_FL	81	94	YRSEVIKNSLNPTW			11	1705.88	ComplexII_solo	3000			3.324	0.011	8.7883
HSUVRAG_FL	81	99	YRSEVIKNSLNPTWRSLDF			16	2324.19	ComplexII_rab5	0			0	0	10.024
HSUVRAG_FL	81	99	YRSEVIKNSLNPTWRSLDF			16	2324.19	ComplexII_rab5	0.3			0.449	0.061	9.9641
HSUVRAG_FL	81	99	YRSEVIKNSLNPTWRSLDF			16	2324.19	ComplexII_rab5	3			1.506	0.148	9.9813
HSUVRAG_FL	81	99	YRSEVIKNSLNPTWRSLDF			16	2324.19	ComplexII_rab5	30			2.802	0.086	9.966
HSUVRAG_FL	81	99	YRSEVIKNSLNPTWRSLDF			16	2324.19	ComplexII_rab5	300			4.404	0.076	9.9735
HSUVRAG_FL	81	99	YRSEVIKNSLNPTWRSLDF			16	2324.19	ComplexII_rab5	3000			5.625	0.052	9.9776
HSUVRAG_FL	81	99	YRSEVIKNSLNPTWRSLDF			16	2324.19	ComplexII_solo	0			0	0	10.0093
HSUVRAG_FL	81	99	YRSEVIKNSLNPTWRSLDF			16	2324.19	ComplexII_solo	0.3			0.393	0.047	9.9658
HSUVRAG_FL	81	99	YRSEVIKNSLNPTWRSLDF			16	2324.19	ComplexII_solo	3			1.56	0.086	10.022
HSUVRAG_FL	81	99	YRSEVIKNSLNPTWRSLDF			16	2324.19	ComplexII_solo	30			2.805	0.12	9.9874
HSUVRAG_FL	81	99	YRSEVIKNSLNPTWRSLDF			16	2324.19	ComplexII_solo	300			4.722	0.094	9.9685
HSUVRAG_FL	81	99	YRSEVIKNSLNPTWRSLDF			16	2324.19	ComplexII_solo	3000			5.868	0.245	10.0386
HSUVRAG_FL	84	99	EVIKNSLNPTWRSLDF			13	1917.99	ComplexII_rab5	0			0	0	10.4069
HSUVRAG_FL	84	99	EVIKNSLNPTWRSLDF			13	1917.99	ComplexII_rab5	0.3			0.476	0.05	10.3716
HSUVRAG_FL	84	99	EVIKNSLNPTWRSLDF			13	1917.99	ComplexII_rab5	3			1.479	0.102	10.4044
HSUVRAG_FL	84	99	EVIKNSLNPTWRSLDF			13	1917.99	ComplexII_rab5	30			2.45	0.087	10.4066
HSUVRAG_FL	84	99	EVIKNSLNPTWRSLDF			13	1917.99	ComplexII_rab5	300			3.522	0.109	10.3773
HSUVRAG_FL	84	99	EVIKNSLNPTWRSLDF			13	1917.99	ComplexII_rab5	3000			4.58	0.013	10.3816
HSUVRAG_FL	84	99	EVIKNSLNPTWRSLDF			13	1917.99	ComplexII_solo	0			0	0	10.415
HSUVRAG_FL	84	99	EVIKNSLNPTWRSLDF			13	1917.99	ComplexII_solo	0.3			0.454	0.017	10.3803
HSUVRAG_FL	84	99	EVIKNSLNPTWRSLDF			13	1917.99	ComplexII_solo	3			1.62	0.079	10.4032
HSUVRAG_FL	84	99	EVIKNSLNPTWRSLDF			13	1917.99	ComplexII_solo	30			2.554	0.075	10.4123
HSUVRAG_FL	84	99	EVIKNSLNPTWRSLDF			13	1917.99	ComplexII_solo	300			3.884	0.081	10.3777
HSUVRAG_FL	84	99	EVIKNSLNPTWRSLDF			13	1917.99	ComplexII_solo	3000			4.874	0.283	10.3727
HSUVRAG_FL	99	106	FGIMPDRL			5	947.49	ComplexII_rab5	0			0	0	10.2753
HSUVRAG_FL	99	106	FGIMPDRL			5	947.49	ComplexII_rab5	0.3			0.69	0.08	10.2947
HSUVRAG_FL	99	106	FGIMPDRL			5	947.49	ComplexII_rab5	3			1.867	0.145	10.3083
HSUVRAG_FL	99	106	FGIMPDRL			5	947.49	ComplexII_rab5	30			2.616	0.084	10.2949
HSUVRAG_FL	99	106	FGIMPDRL			5	947.49	ComplexII_rab5	300			2.797	0.043	10.2638
HSUVRAG_FL	99	106	FGIMPDRL			5	947.49	ComplexII_rab5	3000			2.794	0.024	10.2786
HSUVRAG_FL	99	106	FGIMPDRL			5	947.49	ComplexII_solo	0			0	0	10.2552
HSUVRAG_FL	99	106	FGIMPDRL			5	947.49	ComplexII_solo	0.3			0.589	0.1	10.2982
HSUVRAG_FL	99	106	FGIMPDRL			5	947.49	ComplexII_solo	3			2.006	0.123	10.3229
HSUVRAG_FL	99	106	FGIMPDRL			5	947.49	ComplexII_solo	30			2.667	0.082	10.3006
HSUVRAG_FL	99	106	FGIMPDRL			5	947.49	ComplexII_solo	300			2.972	0.048	10.2974
HSUVRAG_FL	99	106	FGIMPDRL			5	947.49	ComplexII_solo	3000			2.948	0.034	10.2261
HSUVRAG_FL	100	112	GIMPDRLDTSVSC			10	1392.64	ComplexII_rab5	0			0	0	8.7372
HSUVRAG_FL	100	112	GIMPDRLDTSVSC			10	1392.64	ComplexII_rab5	0.3			1.188	0.117	8.7259
HSUVRAG_FL	100	112	GIMPDRLDTSVSC			10	1392.64	ComplexII_rab5	3			3.15	0.199	8.7364
HSUVRAG_FL	100	112	GIMPDRLDTSVSC			10	1392.64	ComplexII_rab5	30			4.54	0.066	8.7312
HSUVRAG_FL	100	112	GIMPDRLDTSVSC			10	1392.64	ComplexII_rab5	300			5.734	0.152	8.7123
HSUVRAG_FL	100	112	GIMPDRLDTSVSC			10	1392.64	ComplexII_rab5	3000			6.143	0.039	8.7199
HSUVRAG_FL	100	112	GIMPDRLDTSVSC			10	1392.64	ComplexII_solo	0			0	0	8.7765
HSUVRAG_FL	100	112	GIMPDRLDTSVSC			10	1392.64	ComplexII_solo	0.3			0.862	0.067	8.7356
HSUVRAG_FL	100	112	GIMPDRLDTSVSC			10	1392.64	ComplexII_solo	3			3.128	0.208	8.777
HSUVRAG_FL	100	112	GIMPDRLDTSVSC			10	1392.64	ComplexII_solo	30			4.627	0.216	8.7455
HSUVRAG_FL	100	112	GIMPDRLDTSVSC			10	1392.64	ComplexII_solo	300			5.957	0.136	8.7339
HSUVRAG_FL	100	112	GIMPDRLDTSVSC			10	1392.64	ComplexII_solo	3000			6.448	0.117	8.7482
HSUVRAG_FL	103	112	PDRLDTSVSC			8	1091.49	ComplexII_rab5	0			0	0	6.891
HSUVRAG_FL	103	112	PDRLDTSVSC			8	1091.49	ComplexII_rab5	0.3			0.209	0.086	6.885
HSUVRAG_FL	103	112	PDRLDTSVSC			8	1091.49	ComplexII_rab5	3			0.792	0.033	6.9008
HSUVRAG_FL	103	112	PDRLDTSVSC			8	1091.49	ComplexII_rab5	30			1.29	0.08	6.8847
HSUVRAG_FL	103	112	PDRLDTSVSC			8	1091.49	ComplexII_rab5	300			1.853	0.066	6.8887
HSUVRAG_FL	103	112	PDRLDTSVSC			8	1091.49	ComplexII_rab5	3000			1.906	0.053	6.884
HSUVRAG_FL	103	112	PDRLDTSVSC			8	1091.49	ComplexII_solo	0			0	0	6.9372
HSUVRAG_FL	103	112	PDRLDTSVSC			8	1091.49	ComplexII_solo	0.3			0.239	0.042	6.9729
HSUVRAG_FL	103	112	PDRLDTSVSC			8	1091.49	ComplexII_solo	3			0.921	0.048	6.9451
HSUVRAG_FL	103	112	PDRLDTSVSC			8	1091.49	ComplexII_solo	30			1.431	0.201	6.9651
HSUVRAG_FL	103	112	PDRLDTSVSC			8	1091.49	ComplexII_solo	300			1.872	0.053	6.9402
HSUVRAG_FL	103	112	PDRLDTSVSC			8	1091.49	ComplexII_solo	3000			1.894	0.111	6.9265
HSUVRAG_FL	107	113	DTSVSCF			5	757.295	ComplexII_rab5	0			0	0	9.2343
HSUVRAG_FL	107	113	DTSVSCF			5	757.295	ComplexII_rab5	0.3			0.089	0.073	9.1775
HSUVRAG_FL	107	113	DTSVSCF			5	757.295	ComplexII_rab5	3			0.68	0.049	9.2126
HSUVRAG_FL	107	113	DTSVSCF			5	757.295	ComplexII_rab5	30			1.302	0.064	9.2056
HSUVRAG_FL	107	113	DTSVSCF			5	757.295	ComplexII_rab5	300			2.352	0.061	9.213
HSUVRAG_FL	107	113	DTSVSCF			5	757.295	ComplexII_rab5	3000			2.644	0.089	9.2084
HSUVRAG_FL	107	113	DTSVSCF			5	757.295	ComplexII_solo	0			0	0	9.2979
HSUVRAG_FL	107	113	DTSVSCF			5	757.295	ComplexII_solo	0.3			0.123	0.023	9.2818
HSUVRAG_FL	107	113	DTSVSCF			5	757.295	ComplexII_solo	3			0.693	0.027	9.3056
HSUVRAG_FL	107	113	DTSVSCF			5	757.295	ComplexII_solo	30			1.333	0.04	9.2812
HSUVRAG_FL	107	113	DTSVSCF			5	757.295	ComplexII_solo	300			2.411	0.034	9.2851
HSUVRAG_FL	107	113	DTSVSCF			5	757.295	ComplexII_solo	3000			2.737	0.031	9.2262
HSUVRAG_FL	113	124	FVVKIWGGKENI			10	1388.78	ComplexII_rab5	0			0	0	9.7337
HSUVRAG_FL	113	124	FVVKIWGGKENI			10	1388.78	ComplexII_rab5	0.3			0.215	0.037	9.6841
HSUVRAG_FL	113	124	FVVKIWGGKENI			10	1388.78	ComplexII_rab5	3			0.621	0.07	9.7119
HSUVRAG_FL	113	124	FVVKIWGGKENI			10	1388.78	ComplexII_rab5	30			1.245	0.04	9.6876
HSUVRAG_FL	113	124	FVVKIWGGKENI			10	1388.78	ComplexII_rab5	300			1.626	0.041	9.6812
HSUVRAG_FL	113	124	FVVKIWGGKENI			10	1388.78	ComplexII_rab5	3000			1.67	0.005	9.6817
HSUVRAG_FL	113	124	FVVKIWGGKENI			10	1388.78	ComplexII_solo	0			0	0	9.7485
HSUVRAG_FL	113	124	FVVKIWGGKENI			10	1388.78	ComplexII_solo	0.3			0.207	0.021	9.6908
HSUVRAG_FL	113	124	FVVKIWGGKENI			10	1388.78	ComplexII_solo	3			0.704	0.059	9.7334
HSUVRAG_FL	113	124	FVVKIWGGKENI			10	1388.78	ComplexII_solo	30			1.296	0.056	9.7022
HSUVRAG_FL	113	124	FVVKIWGGKENI			10	1388.78	ComplexII_solo	300			1.795	0.054	9.6797
HSUVRAG_FL	113	124	FVVKIWGGKENI			10	1388.78	ComplexII_solo	3000			1.717	0.107	9.6644
HSUVRAG_FL	113	127	FVVKIWGGKENIYQL			13	1792.99	ComplexII_rab5	0			0	0	10.6287
HSUVRAG_FL	113	127	FVVKIWGGKENIYQL			13	1792.99	ComplexII_rab5	0.3			0.23	0.03	10.5968
HSUVRAG_FL	113	127	FVVKIWGGKENIYQL			13	1792.99	ComplexII_rab5	3			0.908	0.066	10.6208
HSUVRAG_FL	113	127	FVVKIWGGKENIYQL			13	1792.99	ComplexII_rab5	30			2.506	0.083	10.611
HSUVRAG_FL	113	127	FVVKIWGGKENIYQL			13	1792.99	ComplexII_rab5	300			3.19	0.023	10.5782
HSUVRAG_FL	113	127	FVVKIWGGKENIYQL			13	1792.99	ComplexII_rab5	3000			3.309	0.042	10.6085
HSUVRAG_FL	113	127	FVVKIWGGKENIYQL			13	1792.99	ComplexII_solo	0			0	0	10.6315
HSUVRAG_FL	113	127	FVVKIWGGKENIYQL			13	1792.99	ComplexII_solo	0.3			0.229	0.028	10.5758
HSUVRAG_FL	113	127	FVVKIWGGKENIYQL			13	1792.99	ComplexII_solo	3			1.052	0.053	10.6232
HSUVRAG_FL	113	127	FVVKIWGGKENIYQL			13	1792.99	ComplexII_solo	30			2.705	0.083	10.6131
HSUVRAG_FL	113	127	FVVKIWGGKENIYQL			13	1792.99	ComplexII_solo	300			3.458	0.064	10.5733
HSUVRAG_FL	113	127	FVVKIWGGKENIYQL			13	1792.99	ComplexII_solo	3000			3.523	0.009	10.5456
HSUVRAG_FL	113	128	FVVKIWGGKENIYQLL			14	1906.07	ComplexII_rab5	0			0	0	11.6215
HSUVRAG_FL	113	128	FVVKIWGGKENIYQLL			14	1906.07	ComplexII_rab5	0.3			0.235	0.033	11.5756
HSUVRAG_FL	113	128	FVVKIWGGKENIYQLL			14	1906.07	ComplexII_rab5	3			0.89	0.088	11.6101
HSUVRAG_FL	113	128	FVVKIWGGKENIYQLL			14	1906.07	ComplexII_rab5	30			2.452	0.18	11.6249
HSUVRAG_FL	113	128	FVVKIWGGKENIYQLL			14	1906.07	ComplexII_rab5	300			3.185	0.039	11.5608
HSUVRAG_FL	113	128	FVVKIWGGKENIYQLL			14	1906.07	ComplexII_rab5	3000			3.351	0.009	11.5873
HSUVRAG_FL	113	128	FVVKIWGGKENIYQLL			14	1906.07	ComplexII_solo	0			0	0	11.6272
HSUVRAG_FL	113	128	FVVKIWGGKENIYQLL			14	1906.07	ComplexII_solo	0.3			0.217	0.028	11.6054
HSUVRAG_FL	113	128	FVVKIWGGKENIYQLL			14	1906.07	ComplexII_solo	3			1.011	0.058	11.6247
HSUVRAG_FL	113	128	FVVKIWGGKENIYQLL			14	1906.07	ComplexII_solo	30			2.657	0.105	11.615
HSUVRAG_FL	113	128	FVVKIWGGKENIYQLL			14	1906.07	ComplexII_solo	300			3.45	0.087	11.5575
HSUVRAG_FL	113	128	FVVKIWGGKENIYQLL			14	1906.07	ComplexII_solo	3000			3.616	0.045	11.4808
HSUVRAG_FL	114	124	VVKIWGGKENI			9	1241.71	ComplexII_rab5	0			0	0	8.2945
HSUVRAG_FL	114	124	VVKIWGGKENI			9	1241.71	ComplexII_rab5	0.3			0.252	0.033	8.2544
HSUVRAG_FL	114	124	VVKIWGGKENI			9	1241.71	ComplexII_rab5	3			0.699	0.082	8.2702
HSUVRAG_FL	114	124	VVKIWGGKENI			9	1241.71	ComplexII_rab5	30			1.388	0.054	8.2649
HSUVRAG_FL	114	124	VVKIWGGKENI			9	1241.71	ComplexII_rab5	300			1.77	0.058	8.2652
HSUVRAG_FL	114	124	VVKIWGGKENI			9	1241.71	ComplexII_rab5	3000			1.818	0.011	8.2624
HSUVRAG_FL	114	124	VVKIWGGKENI			9	1241.71	ComplexII_solo	0			0	0	8.3198
HSUVRAG_FL	114	124	VVKIWGGKENI			9	1241.71	ComplexII_solo	0.3			0.234	0.029	8.2921
HSUVRAG_FL	114	124	VVKIWGGKENI			9	1241.71	ComplexII_solo	3			0.774	0.08	8.3249
HSUVRAG_FL	114	124	VVKIWGGKENI			9	1241.71	ComplexII_solo	30			1.404	0.043	8.3002
HSUVRAG_FL	114	124	VVKIWGGKENI			9	1241.71	ComplexII_solo	300			1.861	0.076	8.2852
HSUVRAG_FL	114	124	VVKIWGGKENI			9	1241.71	ComplexII_solo	3000			1.876	0.037	8.2314
HSUVRAG_FL	114	127	VVKIWGGKENIYQL			12	1645.92	ComplexII_rab5	0			0	0	9.7756
HSUVRAG_FL	114	127	VVKIWGGKENIYQL			12	1645.92	ComplexII_rab5	0.3			0.261	0.041	9.7155
HSUVRAG_FL	114	127	VVKIWGGKENIYQL			12	1645.92	ComplexII_rab5	3			0.969	0.091	9.7538
HSUVRAG_FL	114	127	VVKIWGGKENIYQL			12	1645.92	ComplexII_rab5	30			2.607	0.055	9.7296
HSUVRAG_FL	114	127	VVKIWGGKENIYQL			12	1645.92	ComplexII_rab5	300			3.312	0.048	9.7406
HSUVRAG_FL	114	127	VVKIWGGKENIYQL			12	1645.92	ComplexII_rab5	3000			3.429	0.032	9.7516
HSUVRAG_FL	114	127	VVKIWGGKENIYQL			12	1645.92	ComplexII_solo	0			0	0	9.7869
HSUVRAG_FL	114	127	VVKIWGGKENIYQL			12	1645.92	ComplexII_solo	0.3			0.231	0.048	9.7327
HSUVRAG_FL	114	127	VVKIWGGKENIYQL			12	1645.92	ComplexII_solo	3			1.099	0.063	9.7822
HSUVRAG_FL	114	127	VVKIWGGKENIYQL			12	1645.92	ComplexII_solo	30			2.768	0.092	9.7441
HSUVRAG_FL	114	127	VVKIWGGKENIYQL			12	1645.92	ComplexII_solo	300			3.556	0.092	9.7356
HSUVRAG_FL	114	127	VVKIWGGKENIYQL			12	1645.92	ComplexII_solo	3000			3.625	0.016	9.6783
HSUVRAG_FL	114	128	VVKIWGGKENIYQLL			13	1759	ComplexII_rab5	0			0	0	11.0103
HSUVRAG_FL	114	128	VVKIWGGKENIYQLL			13	1759	ComplexII_rab5	0.3			0.262	0.031	10.9818
HSUVRAG_FL	114	128	VVKIWGGKENIYQLL			13	1759	ComplexII_rab5	3			0.984	0.085	11.0111
HSUVRAG_FL	114	128	VVKIWGGKENIYQLL			13	1759	ComplexII_rab5	30			2.688	0.099	10.9818
HSUVRAG_FL	114	128	VVKIWGGKENIYQLL			13	1759	ComplexII_rab5	300			3.379	0.039	10.9552
HSUVRAG_FL	114	128	VVKIWGGKENIYQLL			13	1759	ComplexII_rab5	3000			3.519	0.028	10.9914
HSUVRAG_FL	114	128	VVKIWGGKENIYQLL			13	1759	ComplexII_solo	0			0	0	11.0168
HSUVRAG_FL	114	128	VVKIWGGKENIYQLL			13	1759	ComplexII_solo	0.3			0.225	0.024	10.9797
HSUVRAG_FL	114	128	VVKIWGGKENIYQLL			13	1759	ComplexII_solo	3			1.112	0.038	11.0183
HSUVRAG_FL	114	128	VVKIWGGKENIYQLL			13	1759	ComplexII_solo	30			2.847	0.097	10.9873
HSUVRAG_FL	114	128	VVKIWGGKENIYQLL			13	1759	ComplexII_solo	300			3.652	0.066	10.9668
HSUVRAG_FL	114	128	VVKIWGGKENIYQLL			13	1759	ComplexII_solo	3000			3.686	0.118	10.9237
HSUVRAG_FL	118	126	WGGKENIYQ			7	1093.52	ComplexII_rab5	0			0	0	10.7404
HSUVRAG_FL	118	126	WGGKENIYQ			7	1093.52	ComplexII_rab5	0.3			0.055	0.012	10.7347
HSUVRAG_FL	118	126	WGGKENIYQ			7	1093.52	ComplexII_rab5	3			0.065	0.044	10.7046
HSUVRAG_FL	118	126	WGGKENIYQ			7	1093.52	ComplexII_rab5	30			0.041	0.033	10.6965
HSUVRAG_FL	118	126	WGGKENIYQ			7	1093.52	ComplexII_rab5	300			0.173	0.078	10.6778
HSUVRAG_FL	118	126	WGGKENIYQ			7	1093.52	ComplexII_rab5	3000			0.769	0.014	10.7115
HSUVRAG_FL	118	126	WGGKENIYQ			7	1093.52	ComplexII_solo	0			0	0	10.7136
HSUVRAG_FL	118	126	WGGKENIYQ			7	1093.52	ComplexII_solo	0.3			0.037	0.045	10.6788
HSUVRAG_FL	118	126	WGGKENIYQ			7	1093.52	ComplexII_solo	3			0.03	0.027	10.714
HSUVRAG_FL	118	126	WGGKENIYQ			7	1093.52	ComplexII_solo	30			0.053	0.038	10.7162
HSUVRAG_FL	118	126	WGGKENIYQ			7	1093.52	ComplexII_solo	300			0.218	0.024	10.7078
HSUVRAG_FL	118	126	WGGKENIYQ			7	1093.52	ComplexII_solo	3000			0.796	0.078	10.6817
HSUVRAG_FL	128	135	LIEWKVCL			6	1002.56	ComplexII_rab5	0			0	0	11.5639
HSUVRAG_FL	128	135	LIEWKVCL			6	1002.56	ComplexII_rab5	0.3			0.003	0.006	11.5163
HSUVRAG_FL	128	135	LIEWKVCL			6	1002.56	ComplexII_rab5	3			-0.012	0.032	11.5438
HSUVRAG_FL	128	135	LIEWKVCL			6	1002.56	ComplexII_rab5	30			0.032	0.01	11.5428
HSUVRAG_FL	128	135	LIEWKVCL			6	1002.56	ComplexII_rab5	300			0.109	0.016	11.5136
HSUVRAG_FL	128	135	LIEWKVCL			6	1002.56	ComplexII_rab5	3000			0.815	0.012	11.521
HSUVRAG_FL	128	135	LIEWKVCL			6	1002.56	ComplexII_solo	0			0	0	11.5826
HSUVRAG_FL	128	135	LIEWKVCL			6	1002.56	ComplexII_solo	0.3			-0.004	0.016	11.5059
HSUVRAG_FL	128	135	LIEWKVCL			6	1002.56	ComplexII_solo	3			-0.017	0.015	11.5549
HSUVRAG_FL	128	135	LIEWKVCL			6	1002.56	ComplexII_solo	30			-0.014	0.035	11.5101
HSUVRAG_FL	128	135	LIEWKVCL			6	1002.56	ComplexII_solo	300			0.103	0.038	11.5068
HSUVRAG_FL	128	135	LIEWKVCL			6	1002.56	ComplexII_solo	3000			0.803	0.05	11.5
HSUVRAG_FL	136	155	DGLKYLGQQIHARNQNEIIF			18	2356.23	ComplexII_rab5	0			0	0	9.8245
HSUVRAG_FL	136	155	DGLKYLGQQIHARNQNEIIF			18	2356.23	ComplexII_rab5	0.3			1.159	0.087	9.7732
HSUVRAG_FL	136	155	DGLKYLGQQIHARNQNEIIF			18	2356.23	ComplexII_rab5	3			2.865	0.247	9.759
HSUVRAG_FL	136	155	DGLKYLGQQIHARNQNEIIF			18	2356.23	ComplexII_rab5	30			4.164	0.23	9.775
HSUVRAG_FL	136	155	DGLKYLGQQIHARNQNEIIF			18	2356.23	ComplexII_rab5	300			4.716	0.102	9.7232
HSUVRAG_FL	136	155	DGLKYLGQQIHARNQNEIIF			18	2356.23	ComplexII_rab5	3000			5.759	0.291	9.7726
HSUVRAG_FL	136	155	DGLKYLGQQIHARNQNEIIF			18	2356.23	ComplexII_solo	0			0	0	9.8183
HSUVRAG_FL	136	155	DGLKYLGQQIHARNQNEIIF			18	2356.23	ComplexII_solo	0.3			1.115	0.122	9.8096
HSUVRAG_FL	136	155	DGLKYLGQQIHARNQNEIIF			18	2356.23	ComplexII_solo	3			3.113	0.106	9.7927
HSUVRAG_FL	136	155	DGLKYLGQQIHARNQNEIIF			18	2356.23	ComplexII_solo	30			4.1	0.186	9.7878
HSUVRAG_FL	136	155	DGLKYLGQQIHARNQNEIIF			18	2356.23	ComplexII_solo	300			4.993	0.208	9.7723
HSUVRAG_FL	136	155	DGLKYLGQQIHARNQNEIIF			18	2356.23	ComplexII_solo	3000			5.866	0.402	9.7534
HSUVRAG_FL	139	152	KYLGQQIHARNQNE			12	1697.86	ComplexII_rab5	0			0	0	5.1684
HSUVRAG_FL	139	152	KYLGQQIHARNQNE			12	1697.86	ComplexII_rab5	0.3			1.004	0.087	5.1708
HSUVRAG_FL	139	152	KYLGQQIHARNQNE			12	1697.86	ComplexII_rab5	3			2.4	0.172	5.1782
HSUVRAG_FL	139	152	KYLGQQIHARNQNE			12	1697.86	ComplexII_rab5	30			3.449	0.126	5.1599
HSUVRAG_FL	139	152	KYLGQQIHARNQNE			12	1697.86	ComplexII_rab5	300			3.791	0.088	5.1761
HSUVRAG_FL	139	152	KYLGQQIHARNQNE			12	1697.86	ComplexII_rab5	3000			4.522	0.043	5.1484
HSUVRAG_FL	139	152	KYLGQQIHARNQNE			12	1697.86	ComplexII_solo	0			0	0	5.202
HSUVRAG_FL	139	152	KYLGQQIHARNQNE			12	1697.86	ComplexII_solo	0.3			0.774	0.115	5.173
HSUVRAG_FL	139	152	KYLGQQIHARNQNE			12	1697.86	ComplexII_solo	3			2.548	0.179	5.2155
HSUVRAG_FL	139	152	KYLGQQIHARNQNE			12	1697.86	ComplexII_solo	30			3.429	0.178	5.1922
HSUVRAG_FL	139	152	KYLGQQIHARNQNE			12	1697.86	ComplexII_solo	300			4.067	0.152	5.1824
HSUVRAG_FL	139	152	KYLGQQIHARNQNE			12	1697.86	ComplexII_solo	3000			4.674	0.375	5.1742
HSUVRAG_FL	153	161	IIFGLNDGY			7	1010.51	ComplexII_rab5	0			0	0	11.2461
HSUVRAG_FL	153	161	IIFGLNDGY			7	1010.51	ComplexII_rab5	0.3			0.225	0.038	11.2351
HSUVRAG_FL	153	161	IIFGLNDGY			7	1010.51	ComplexII_rab5	3			0.562	0.082	11.24
HSUVRAG_FL	153	161	IIFGLNDGY			7	1010.51	ComplexII_rab5	30			0.871	0.032	11.2565
HSUVRAG_FL	153	161	IIFGLNDGY			7	1010.51	ComplexII_rab5	300			1.072	0.029	11.2343
HSUVRAG_FL	153	161	IIFGLNDGY			7	1010.51	ComplexII_rab5	3000			1.2	0.021	11.2347
HSUVRAG_FL	153	161	IIFGLNDGY			7	1010.51	ComplexII_solo	0			0	0	11.2597
HSUVRAG_FL	153	161	IIFGLNDGY			7	1010.51	ComplexII_solo	0.3			0.204	0.022	11.2283
HSUVRAG_FL	153	161	IIFGLNDGY			7	1010.51	ComplexII_solo	3			0.617	0.058	11.2598
HSUVRAG_FL	153	161	IIFGLNDGY			7	1010.51	ComplexII_solo	30			0.861	0.046	11.2289
HSUVRAG_FL	153	161	IIFGLNDGY			7	1010.51	ComplexII_solo	300			1.181	0.062	11.2327
HSUVRAG_FL	153	161	IIFGLNDGY			7	1010.51	ComplexII_solo	3000			1.218	0.096	11.2102
HSUVRAG_FL	153	174	IIFGLNDGYYGAPFEHKGYSNA			19	2432.14	ComplexII_rab5	0			0	0	10.4611
HSUVRAG_FL	153	174	IIFGLNDGYYGAPFEHKGYSNA			19	2432.14	ComplexII_rab5	0.3			2.202	0.466	10.4589
HSUVRAG_FL	153	174	IIFGLNDGYYGAPFEHKGYSNA			19	2432.14	ComplexII_rab5	3			2.721	0.257	10.4323
HSUVRAG_FL	153	174	IIFGLNDGYYGAPFEHKGYSNA			19	2432.14	ComplexII_rab5	30			3.198	0.148	10.4258
HSUVRAG_FL	153	174	IIFGLNDGYYGAPFEHKGYSNA			19	2432.14	ComplexII_rab5	300			3.57	0.116	10.4105
HSUVRAG_FL	153	174	IIFGLNDGYYGAPFEHKGYSNA			19	2432.14	ComplexII_rab5	3000			3.944	0.083	10.4322
HSUVRAG_FL	153	174	IIFGLNDGYYGAPFEHKGYSNA			19	2432.14	ComplexII_solo	0			0	0	10.4499
HSUVRAG_FL	153	174	IIFGLNDGYYGAPFEHKGYSNA			19	2432.14	ComplexII_solo	0.3			1.771	0.179	10.4064
HSUVRAG_FL	153	174	IIFGLNDGYYGAPFEHKGYSNA			19	2432.14	ComplexII_solo	3			2.914	0.196	10.4137
HSUVRAG_FL	153	174	IIFGLNDGYYGAPFEHKGYSNA			19	2432.14	ComplexII_solo	30			3.221	0.092	10.4211
HSUVRAG_FL	153	174	IIFGLNDGYYGAPFEHKGYSNA			19	2432.14	ComplexII_solo	300			3.962	0.152	10.4004
HSUVRAG_FL	153	174	IIFGLNDGYYGAPFEHKGYSNA			19	2432.14	ComplexII_solo	3000			4.004	0.319	10.3919
HSUVRAG_FL	155	179	FGLNDGYYGAPFEHKGYSNAQKTIL			22	2789.34	ComplexII_rab5	0			0	0	10.386
HSUVRAG_FL	155	179	FGLNDGYYGAPFEHKGYSNAQKTIL			22	2789.34	ComplexII_rab5	0.3			3.834	0.39	10.3698
HSUVRAG_FL	155	179	FGLNDGYYGAPFEHKGYSNAQKTIL			22	2789.34	ComplexII_rab5	3			5.277	0.313	10.3694
HSUVRAG_FL	155	179	FGLNDGYYGAPFEHKGYSNAQKTIL			22	2789.34	ComplexII_rab5	30			6.187	0.185	10.3682
HSUVRAG_FL	155	179	FGLNDGYYGAPFEHKGYSNAQKTIL			22	2789.34	ComplexII_rab5	300			6.645	0.151	10.3371
HSUVRAG_FL	155	179	FGLNDGYYGAPFEHKGYSNAQKTIL			22	2789.34	ComplexII_rab5	3000			7.141	0.041	10.3833
HSUVRAG_FL	155	179	FGLNDGYYGAPFEHKGYSNAQKTIL			22	2789.34	ComplexII_solo	0			0	0	10.3975
HSUVRAG_FL	155	179	FGLNDGYYGAPFEHKGYSNAQKTIL			22	2789.34	ComplexII_solo	0.3			3.253	0.373	10.3471
HSUVRAG_FL	155	179	FGLNDGYYGAPFEHKGYSNAQKTIL			22	2789.34	ComplexII_solo	3			5.712	0.398	10.391
HSUVRAG_FL	155	179	FGLNDGYYGAPFEHKGYSNAQKTIL			22	2789.34	ComplexII_solo	30			6.315	0.249	10.3512
HSUVRAG_FL	155	179	FGLNDGYYGAPFEHKGYSNAQKTIL			22	2789.34	ComplexII_solo	300			7.263	0.166	10.3515
HSUVRAG_FL	155	179	FGLNDGYYGAPFEHKGYSNAQKTIL			22	2789.34	ComplexII_solo	3000			7.172	0.469	10.3535
HSUVRAG_FL	156	174	GLNDGYYGAPFEHKGYSNA			16	2058.91	ComplexII_rab5	0			0	0	8.4473
HSUVRAG_FL	156	174	GLNDGYYGAPFEHKGYSNA			16	2058.91	ComplexII_rab5	0.3			2.379	0.236	8.4063
HSUVRAG_FL	156	174	GLNDGYYGAPFEHKGYSNA			16	2058.91	ComplexII_rab5	3			2.893	0.267	8.4623
HSUVRAG_FL	156	174	GLNDGYYGAPFEHKGYSNA			16	2058.91	ComplexII_rab5	30			3.417	0.148	8.4448
HSUVRAG_FL	156	174	GLNDGYYGAPFEHKGYSNA			16	2058.91	ComplexII_rab5	300			3.723	0.082	8.4311
HSUVRAG_FL	156	174	GLNDGYYGAPFEHKGYSNA			16	2058.91	ComplexII_rab5	3000			4.199	0.079	8.4422
HSUVRAG_FL	156	174	GLNDGYYGAPFEHKGYSNA			16	2058.91	ComplexII_solo	0			0	0	8.4917
HSUVRAG_FL	156	174	GLNDGYYGAPFEHKGYSNA			16	2058.91	ComplexII_solo	0.3			1.956	0.232	8.4806
HSUVRAG_FL	156	174	GLNDGYYGAPFEHKGYSNA			16	2058.91	ComplexII_solo	3			3.1	0.238	8.4872
HSUVRAG_FL	156	174	GLNDGYYGAPFEHKGYSNA			16	2058.91	ComplexII_solo	30			3.469	0.096	8.4627
HSUVRAG_FL	156	174	GLNDGYYGAPFEHKGYSNA			16	2058.91	ComplexII_solo	300			4.215	0.143	8.4354
HSUVRAG_FL	156	174	GLNDGYYGAPFEHKGYSNA			16	2058.91	ComplexII_solo	3000			4.234	0.322	8.4374
HSUVRAG_FL	156	179	GLNDGYYGAPFEHKGYSNAQKTIL			21	2642.28	ComplexII_rab5	0			0	0	8.9683
HSUVRAG_FL	156	179	GLNDGYYGAPFEHKGYSNAQKTIL			21	2642.28	ComplexII_rab5	0.3			3.939	0.462	8.9329
HSUVRAG_FL	156	179	GLNDGYYGAPFEHKGYSNAQKTIL			21	2642.28	ComplexII_rab5	3			5.528	0.445	8.9413
HSUVRAG_FL	156	179	GLNDGYYGAPFEHKGYSNAQKTIL			21	2642.28	ComplexII_rab5	30			6.425	0.153	8.947
HSUVRAG_FL	156	179	GLNDGYYGAPFEHKGYSNAQKTIL			21	2642.28	ComplexII_rab5	300			6.95	0.135	8.9133
HSUVRAG_FL	156	179	GLNDGYYGAPFEHKGYSNAQKTIL			21	2642.28	ComplexII_rab5	3000			7.388	0.078	8.9275
HSUVRAG_FL	156	179	GLNDGYYGAPFEHKGYSNAQKTIL			21	2642.28	ComplexII_solo	0			0	0	8.9988
HSUVRAG_FL	156	179	GLNDGYYGAPFEHKGYSNAQKTIL			21	2642.28	ComplexII_solo	0.3			3.338	0.319	8.9269
HSUVRAG_FL	156	179	GLNDGYYGAPFEHKGYSNAQKTIL			21	2642.28	ComplexII_solo	3			5.79	0.322	8.9767
HSUVRAG_FL	156	179	GLNDGYYGAPFEHKGYSNAQKTIL			21	2642.28	ComplexII_solo	30			6.52	0.241	8.9627
HSUVRAG_FL	156	179	GLNDGYYGAPFEHKGYSNAQKTIL			21	2642.28	ComplexII_solo	300			7.532	0.19	8.9441
HSUVRAG_FL	156	179	GLNDGYYGAPFEHKGYSNAQKTIL			21	2642.28	ComplexII_solo	3000			7.532	0.459	8.8767
HSUVRAG_FL	159	174	DGYYGAPFEHKGYSNA			13	1774.76	ComplexII_rab5	0			0	0	7.9707
HSUVRAG_FL	159	174	DGYYGAPFEHKGYSNA			13	1774.76	ComplexII_rab5	0.3			2.177	0.187	7.9478
HSUVRAG_FL	159	174	DGYYGAPFEHKGYSNA			13	1774.76	ComplexII_rab5	3			2.633	0.199	7.9513
HSUVRAG_FL	159	174	DGYYGAPFEHKGYSNA			13	1774.76	ComplexII_rab5	30			2.764	0.141	7.946
HSUVRAG_FL	159	174	DGYYGAPFEHKGYSNA			13	1774.76	ComplexII_rab5	300			2.938	0.028	7.9533
HSUVRAG_FL	159	174	DGYYGAPFEHKGYSNA			13	1774.76	ComplexII_rab5	3000			3.251	0.103	7.94
HSUVRAG_FL	159	174	DGYYGAPFEHKGYSNA			13	1774.76	ComplexII_solo	0			0	0	7.9879
HSUVRAG_FL	159	174	DGYYGAPFEHKGYSNA			13	1774.76	ComplexII_solo	0.3			1.898	0.249	7.9641
HSUVRAG_FL	159	174	DGYYGAPFEHKGYSNA			13	1774.76	ComplexII_solo	3			2.755	0.18	7.993
HSUVRAG_FL	159	174	DGYYGAPFEHKGYSNA			13	1774.76	ComplexII_solo	30			2.853	0.155	7.9604
HSUVRAG_FL	159	174	DGYYGAPFEHKGYSNA			13	1774.76	ComplexII_solo	300			3.393	0.065	7.9777
HSUVRAG_FL	159	174	DGYYGAPFEHKGYSNA			13	1774.76	ComplexII_solo	3000			3.429	0.246	7.9592
HSUVRAG_FL	159	179	DGYYGAPFEHKGYSNAQKTIL			18	2358.13	ComplexII_rab5	0			0	0	8.6866
HSUVRAG_FL	159	179	DGYYGAPFEHKGYSNAQKTIL			18	2358.13	ComplexII_rab5	0.3			3.769	0.387	8.6264
HSUVRAG_FL	159	179	DGYYGAPFEHKGYSNAQKTIL			18	2358.13	ComplexII_rab5	3			5.164	0.443	8.656
HSUVRAG_FL	159	179	DGYYGAPFEHKGYSNAQKTIL			18	2358.13	ComplexII_rab5	30			5.862	0.118	8.6509
HSUVRAG_FL	159	179	DGYYGAPFEHKGYSNAQKTIL			18	2358.13	ComplexII_rab5	300			6.183	0.146	8.6704
HSUVRAG_FL	159	179	DGYYGAPFEHKGYSNAQKTIL			18	2358.13	ComplexII_rab5	3000			6.589	0.074	8.6483
HSUVRAG_FL	159	179	DGYYGAPFEHKGYSNAQKTIL			18	2358.13	ComplexII_solo	0			0	0	8.7083
HSUVRAG_FL	159	179	DGYYGAPFEHKGYSNAQKTIL			18	2358.13	ComplexII_solo	0.3			3.243	0.301	8.7216
HSUVRAG_FL	159	179	DGYYGAPFEHKGYSNAQKTIL			18	2358.13	ComplexII_solo	3			5.492	0.335	8.7159
HSUVRAG_FL	159	179	DGYYGAPFEHKGYSNAQKTIL			18	2358.13	ComplexII_solo	30			5.978	0.266	8.6984
HSUVRAG_FL	159	179	DGYYGAPFEHKGYSNAQKTIL			18	2358.13	ComplexII_solo	300			6.719	0.216	8.6885
HSUVRAG_FL	159	179	DGYYGAPFEHKGYSNAQKTIL			18	2358.13	ComplexII_solo	3000			6.859	0.206	8.612
HSUVRAG_FL	162	179	YGAPFEHKGYSNAQKTIL			15	2023.02	ComplexII_rab5	0			0	0	7.787
HSUVRAG_FL	162	179	YGAPFEHKGYSNAQKTIL			15	2023.02	ComplexII_rab5	0.3			3.771	0.407	7.7453
HSUVRAG_FL	162	179	YGAPFEHKGYSNAQKTIL			15	2023.02	ComplexII_rab5	3			5.069	0.374	7.7662
HSUVRAG_FL	162	179	YGAPFEHKGYSNAQKTIL			15	2023.02	ComplexII_rab5	30			5.814	0.144	7.7468
HSUVRAG_FL	162	179	YGAPFEHKGYSNAQKTIL			15	2023.02	ComplexII_rab5	300			6.071	0.134	7.7453
HSUVRAG_FL	162	179	YGAPFEHKGYSNAQKTIL			15	2023.02	ComplexII_rab5	3000			6.269	0.08	7.7739
HSUVRAG_FL	162	179	YGAPFEHKGYSNAQKTIL			15	2023.02	ComplexII_solo	0			0	0	7.8237
HSUVRAG_FL	162	179	YGAPFEHKGYSNAQKTIL			15	2023.02	ComplexII_solo	0.3			3.141	0.276	7.8178
HSUVRAG_FL	162	179	YGAPFEHKGYSNAQKTIL			15	2023.02	ComplexII_solo	3			5.27	0.357	7.8331
HSUVRAG_FL	162	179	YGAPFEHKGYSNAQKTIL			15	2023.02	ComplexII_solo	30			5.773	0.25	7.805
HSUVRAG_FL	162	179	YGAPFEHKGYSNAQKTIL			15	2023.02	ComplexII_solo	300			6.531	0.099	7.8022
HSUVRAG_FL	162	179	YGAPFEHKGYSNAQKTIL			15	2023.02	ComplexII_solo	3000			6.339	0.418	7.8024
HSUVRAG_FL	166	172	FEHKGYS			5	866.392	ComplexII_rab5	0			0	0	4.9905
HSUVRAG_FL	166	172	FEHKGYS			5	866.392	ComplexII_rab5	0.3			0.261	0.076	4.9689
HSUVRAG_FL	166	172	FEHKGYS			5	866.392	ComplexII_rab5	3			0.411	0.057	4.9934
HSUVRAG_FL	166	172	FEHKGYS			5	866.392	ComplexII_rab5	30			0.486	0.042	4.9615
[truncated: 7,030 more rows]
