# Supplementary figures and images for: A novel RAB5 binding site in human VPS34-CII that is likely the primordial site in eukaryotic evolution
Source: eLife journal article supplement (doi:10.7554/elife.110040), 2026-02-19

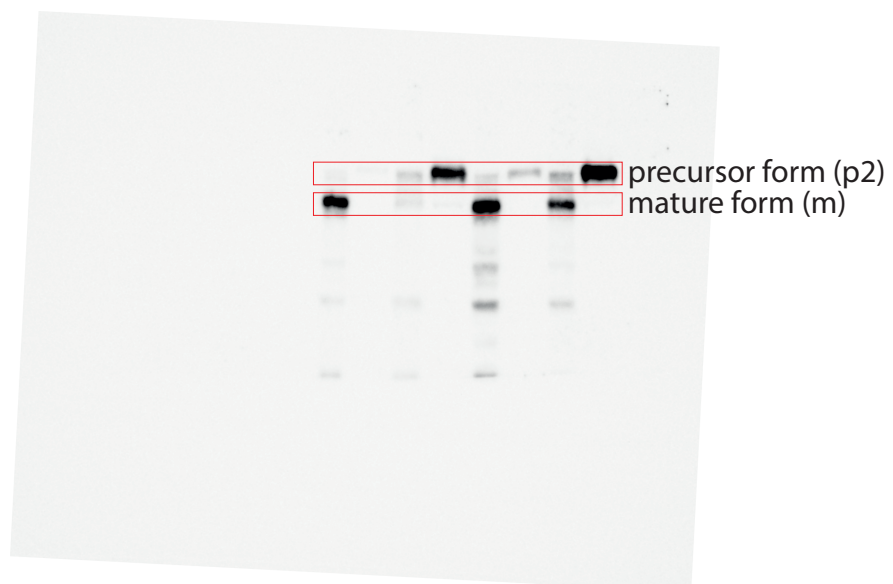

Supplement: fig2-data3 [file anti-CPY.pdf › Figure2-source-data_2/anti-CPY.pdf]

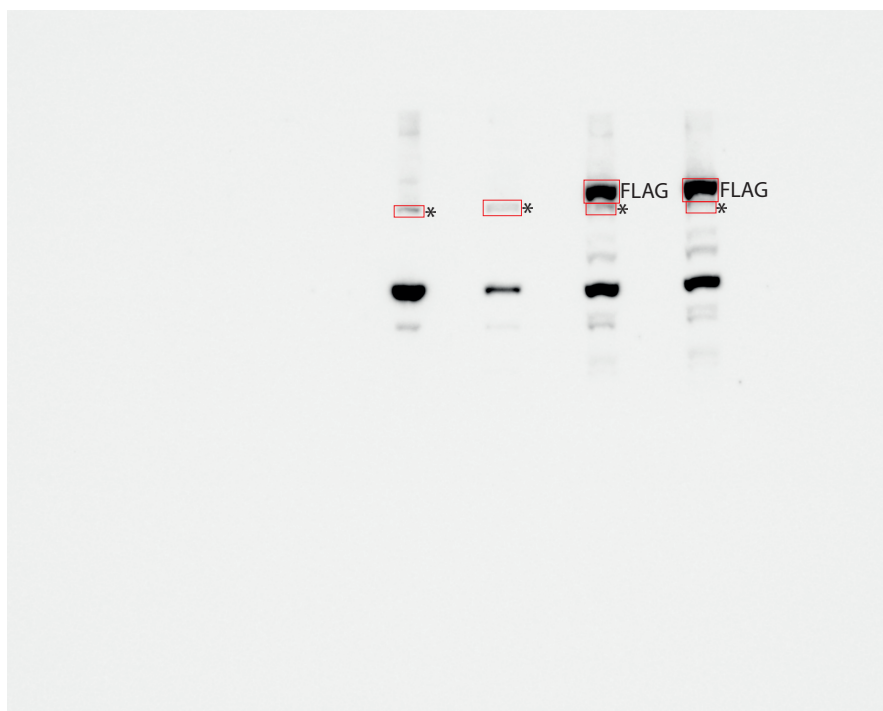

\* = non-specific cross-react

Supplement: fig2-data3 [file anti-FLAG.pdf › Figure2-source-data_2/anti-FLAG.pdf]

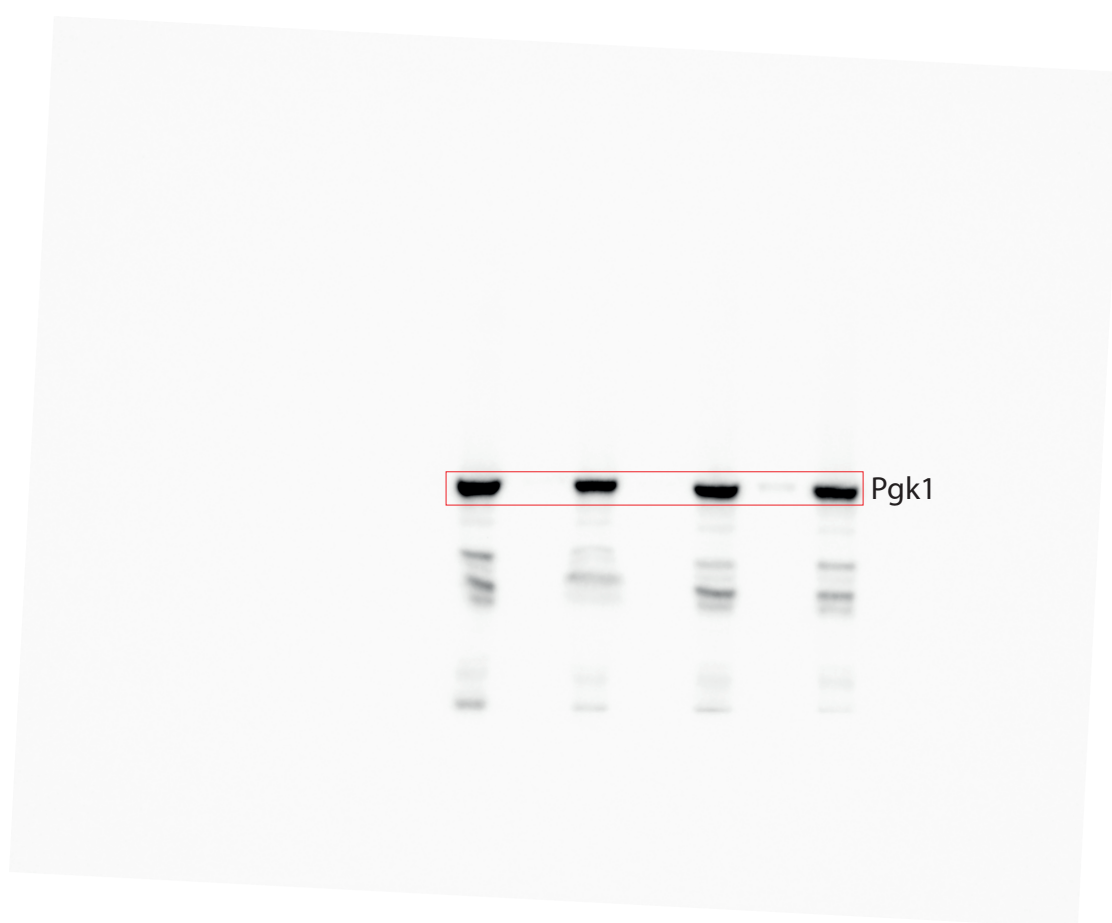

Supplement: fig2-data3 [file anti-Pgk1.pdf › Figure2-source-data_2/anti-Pgk1.pdf]
